# Supplementary material for: Drought-Induced Leaf Proteome Changes in Switchgrass Seedlings
Source: Int J Mol Sci. 2016 Aug 2;17(8):1251. doi: 10.3390/ijms17081251 (PMC5000649; doi:10.3390/ijms17081251)
Supplement: Supplementary file 1 [file ijms-17-01251-s001.zip]

Archive with 4 entries (4 files):
- Supplemental Table S2.xlsx
- Supplemental Table S3.xlsx
- ijms-139535-supp-fig.pdf
- Supplemental Table S1.xlsx
