# Supplementary material for: Drought-Induced Leaf Proteome Changes in Switchgrass Seedlings
Source: Int J Mol Sci. 2016 Aug 2;17(8):1251. doi: 10.3390/ijms17081251 (PMC5000649; doi:10.3390/ijms17081251)
Supplement: Supplementary file 1 [file ijms-17-01251-s001.zip › Supplemental Table S1.xlsx]

## Sheet: Table S1-1
Table S1-1. Proteins identified in crude leaf extract proteome from switchgrass plants under drought treatment conditions.
Protein ID	Accessiona	Protein Hit Number	No. Peptides	Log2Ratio(T/C)b	Fold changec	t-test-P-value	FDR	Functional Pathway (MapMan)d	Annotation (A. thaliana database) e
									Accession	Description
30209649	Pavir.Ia00532.1	828	5	-2.662	0.158	<.0001	<.0001	protein.degradation.cysteine protease	AT5G45890.1	senescence-associated gene 12
30292536	Pavir.Ba01669.1	3934	4	-2.55724	0.1699	<.0001	<.0001	protein.degradation.cysteine protease	AT1G06260.1	Cysteine proteinases superfamily protein
30221620	Pavir.Gb00328.1	314	49	-2.41581	0.1874	<.0001	<.0001	amino acid metabolism.degradation.aspartate family.asparagine.L-asparaginase	AT3G16150.1	N-terminal nucleophile aminohydrolases (Ntn hydrolases) superfamily protein
30274737	Pavir.J09494.1	5226	1	-2.17723	0.2211	<.0001	<.0001	protein.postranslational modification	AT1G47380.1	Protein phosphatase 2C family protein
30256951	Pavir.J07398.1	3645	2	-1.92303	0.2637	<.0001	<.0001	signalling.light	AT2G30520.1	Phototropic-responsive NPH3 family protein
30192408	Pavir.Da02354.1	4569	1	-1.86986	0.2736	0.008	0.0287	stress.abiotic	AT5G52060.1	BCL-2-associated athanogene 1
30193463	Pavir.Da00224.1	4674	1	-1.72738	0.302	0.0065	0.0243	secondary metabolism.flavonoids.chalcones	AT5G05270.1	Chalcone-flavanone isomerase family protein
30274447	Pavir.J08461.1	1043	22	-1.69572	0.3087	<.0001	<.0001	N/A	N/A	N/A
30240634	Pavir.Ib00587.1	3646	6	-1.68409	0.3112	<.0001	<.0001	minor CHO metabolism.myo-inositol.InsP Synthases	AT2G22240.1	myo-inositol-1-phosphate synthase 2
30223588	Pavir.Gb01774.1	5386	1	-1.52575	0.3473	0.0054	0.0209	N/A	AT3G09980.1	Family of unknown function (DUF662)
30225215	Pavir.J08126.1	736	5	-1.46913	0.3612	<.0001	<.0001	protein.degradation.cysteine protease	AT5G45890.1	senescence-associated gene 12
30318267	Pavir.Ha00814.1	2773	6	-1.44575	0.3671	<.0001	<.0001	tetrapyrrole synthesis.regulation	AT3G59400.1	enzyme binding;tetrapyrrole binding
30194923	Pavir.J41040.1	2276	13	-1.41773	0.3743	<.0001	<.0001	N/A	N/A	N/A
30265539	Pavir.Hb01323.1	4738	1	-1.40583	0.3774	0.047	0.1218	tetrapyrrole synthesis.regulation	AT3G59400.1	enzyme binding;tetrapyrrole binding
30311575	Pavir.Eb01684.1	3884	7	-1.33461	0.3965	<.0001	<.0001	N/A	N/A	N/A
30269394	Pavir.Cb00685.1	4208	6	-1.30972	0.4034	0.0016	0.0074	N/A	N/A	N/A
30305852	Pavir.Ga00666.1	3083	9	-1.30436	0.4049	<.0001	<.0001	N/A	AT3G15040.1	Protein of unknown function, DUF584
30222739	Pavir.Gb00643.1	5109	2	-1.27265	0.4139	0.0004	0.0022	secondary metabolism.phenylpropanoids.lignin biosynthesis.PAL	AT3G53260.1	phenylalanine ammonia-lyase 2
30240907	Pavir.Ib03730.1	4781	2	-1.18935	0.4385	<.0001	<.0001	N/A	AT5G24660.1	response to low sulfur 2
30305393	Pavir.Ga00090.1	5335	1	-1.18115	0.441	0.4512	0.6168	N/A	AT3G50120.1	Plant protein of unknown function (DUF247)
30316160	Pavir.Ha01806.1	2272	3	-1.17299	0.4435	0.009	0.0319	not assigned.no ontology	AT3G48420.1	Haloacid dehalogenase-like hydrolase (HAD) superfamily protein
30277137	Pavir.J19731.1	3800	2	-1.16101	0.4472	<.0001	<.0001	N/A	AT5G59790.1	Domain of unknown function (DUF966)
30252669	Pavir.Aa00641.1	2456	7	-1.1565	0.4486	<.0001	<.0001	protein.targeting.chloroplast	AT3G52420.1	outer envelope membrane protein 7
30195242	Pavir.J34591.1	4053	3	-1.13258	0.4561	0.0018	0.0082	signalling.receptor kinases.DUF 26	AT4G23180.1	cysteine-rich RLK (RECEPTOR-like protein kinase) 10
30229305	Pavir.Ea03280.1	4309	1	-1.12281	0.4592	<.0001	<.0001	RNA.regulation of transcription.WRKY domain transcription factor family	AT2G38470.1	WRKY DNA-binding protein 33
30249014	Pavir.Aa00796.1	5299	1	-1.11497	0.4617	0.0263	0.0767	cell.organisation	AT3G27960.1	Tetratricopeptide repeat (TPR)-like superfamily protein
30202848	Pavir.J37543.1	1196	3	-1.09727	0.4674	<.0001	<.0001	protein.targeting.secretory pathway.unspecified	AT4G09160.1	SEC14 cytosolic factor family protein / phosphoglyceride transfer family protein
30293316	Pavir.Ba01379.1	3822	4	-1.09357	0.4686	<.0001	<.0001	RNA.regulation of transcription.Nucleosome/chromatin assembly factor group	AT1G20696.3	high mobility group B3
30232423	Pavir.Ab03111.1	2798	7	-1.09142	0.4693	<.0001	<.0001	N/A	AT1G64980.1	Nucleotide-diphospho-sugar transferases superfamily protein
30256265	Pavir.J25534.1	3115	2	-1.07613	0.4743	0.0003	0.0017	secondary metabolism.phenylpropanoids.lignin biosynthesis.PAL	AT3G53260.1	phenylalanine ammonia-lyase 2
30237743	Pavir.Ib02473.1	4023	1	-1.074	0.475	0.0513	0.1301	N/A	AT5G52780.1	Protein of unknown function (DUF3464)
30215299	Pavir.Ia01092.1	1861	1	-1.06492	0.478	0.0011	0.0054	cell.organisation	AT5G23860.1	tubulin beta 8
30231098	Pavir.Ea01593.1	1976	1	-1.05349	0.4818	0.0132	0.0435	protein.targeting.chloroplast	AT4G02510.1	translocon at the outer envelope membrane of chloroplasts 159
30235206	Pavir.Ab02777.1	1950	1	-1.04901	0.4833	0.0114	0.0385	cell.vesicle transport	AT5G46860.1	Syntaxin/t-SNARE family protein
30313914	Pavir.Eb00285.1	4010	2	-1.04543	0.4845	<.0001	<.0001	N/A	AT1G17620.1	Late embryogenesis abundant (LEA) hydroxyproline-rich glycoprotein family
30198130	Pavir.J15706.1	4409	4	-1.04424	0.4849	<.0001	<.0001	N/A	AT5G53420.1	CCT motif family protein
30237176	Pavir.Ib03226.1	4922	2	-1.04186	0.4857	0.0001	0.0006	signalling.receptor kinases.DUF 26	AT1G70520.1	cysteine-rich RLK (RECEPTOR-like protein kinase) 2
30231504	Pavir.Ea00263.1	5015	1	-1.02797	0.4904	0.0094	0.033	TCA / org transformation.other organic acid transformatons.malic	AT1G79750.1	NADP-malic enzyme 4
30296206	Pavir.J03896.1	748	17	-1.0221	0.4924	<.0001	<.0001	protein.targeting.secretory pathway.unspecified	AT4G09160.1	SEC14 cytosolic factor family protein / phosphoglyceride transfer family protein
30219586	Pavir.J22672.1	2800	3	-1.01479	0.4949	0.058	0.1429	hormone metabolism.ethylene.synthesis-degradation	AT5G59530.1	2-oxoglutarate (2OG) and Fe(II)-dependent oxygenase superfamily protein
30259413	Pavir.J02321.1	4552	3	-1.01421	0.4951	0.0013	0.0062	RNA.regulation of transcription.unclassified	AT5G50020.2	DHHC-type zinc finger family protein
30253591	Pavir.Aa00220.1	2425	3	-1.00723	0.4975	<.0001	<.0001	N/A	AT4G28080.1	Tetratricopeptide repeat (TPR)-like superfamily protein
30300175	Pavir.Bb01857.1	5398	1	-1.00491	0.4983	0.0021	0.0094	protein.degradation	AT1G76140.1
30200504	Pavir.J21702.1	4487	1	-1.00318	0.4989	0.1094	0.2302	not assigned.no ontology.tetratricopeptide repeat (TPR)	AT4G37210.1	Tetratricopeptide repeat (TPR)-like superfamily protein
30231124	Pavir.Ea01477.1	1816	8	-0.995678	0.5015	<.0001	<.0001	misc.peroxidases	AT3G21770.1	Peroxidase superfamily protein
30250830	Pavir.Aa00280.1	4926	4	-0.994528	0.5019	0.0183	0.0568	cell.cycle	AT3G18730.1	tetratricopeptide repeat (TPR)-containing protein
30289315	Pavir.Ba01478.1	3755	1	-0.993666	0.5022	0.0004	0.0022	RNA.regulation of transcription.C2H2 zinc finger family	AT2G02080.1	indeterminate(ID)-domain 4
30238046	Pavir.Ib01000.1	5244	1	-0.99223	0.5027	0.056	0.1396	N/A	AT5G22340.1	N/A
30289563	Pavir.Ba01564.1	3590	1	-0.98965	0.5036	0.0648	0.1556	N/A	N/A	N/A
30249038	Pavir.Aa01274.1	1700	5	-0.987932	0.5042	<.0001	<.0001	secondary metabolism.phenylpropanoids.lignin biosynthesis.PAL	AT2G37040.1	PHE ammonia lyase 1
30262615	Pavir.Db01039.1	5387	1	-0.983646	0.5057	0.5154	0.6724	development.unspecified	AT3G47650.1	DnaJ/Hsp40 cysteine-rich domain superfamily protein
30293348	Pavir.Ba00161.1	986	11	-0.982506	0.5061	<.0001	<.0001	not assigned.no ontology	AT3G05500.1	Rubber elongation factor protein (REF)
30245209	Pavir.J38936.1	3133	6	-0.961283	0.5136	0.0061	0.023	cell wall.cell wall proteins.LRR	AT4G06744.1	Leucine-rich repeat (LRR) family protein
30227923	Pavir.Ea01561.1	3460	5	-0.954277	0.5161	<.0001	<.0001	signalling.receptor kinases.DUF 26	AT4G23180.1	cysteine-rich RLK (RECEPTOR-like protein kinase) 10
30244271	Pavir.J17749.1	2553	3	-0.94675	0.5188	<.0001	<.0001	protein.postranslational modification	AT4G27800.1	thylakoid-associated phosphatase 38
30204809	Pavir.Ca00335.1	5178	1	-0.945082	0.5194	0.0186	0.0576	N/A	AT1G33800.1	Protein of unknown function (DUF579)
30247585	Pavir.J15625.1	4588	1	-0.944804	0.5195	0.005	0.0196	nucleotide metabolism.synthesis.purine.amidophosphoribosyltransferase	AT2G16570.1	GLN phosphoribosyl pyrophosphate amidotransferase 1
30262148	Pavir.Db00040.1	5526	1	-0.940922	0.5209	0.1327	0.2678	RNA.regulation of transcription.Nucleosome/chromatin assembly factor group	AT1G20696.2	high mobility group B3
30262521	Pavir.Db02350.1	2101	8	-0.935117	0.523	<.0001	<.0001	DNA.synthesis/chromatin structure.histone.H1	AT2G18050.1	histone H1-3
30293631	Pavir.Ba03810.1	5315	1	-0.930985	0.5245	0.0138	0.0451	stress.biotic.PR-proteins	AT1G50180.1	NB-ARC domain-containing disease resistance protein
30267394	Pavir.J05562.1	1828	11	-0.927414	0.5258	<.0001	<.0001	DNA.synthesis/chromatin structure.histone.H1	AT2G18050.1	histone H1-3
30252463	Pavir.Aa00986.1	1256	20	-0.921663	0.5279	<.0001	<.0001	not assigned.no ontology	AT5G16730.1	Plant protein of unknown function (DUF827)
30241384	Pavir.Ib01438.1	966	8	-0.917297	0.5295	0.0574	0.1421	PS.calvin cycle	AT2G47400.1	CP12 domain-containing protein 1
30256564	Pavir.J13364.1	1592	11	-0.910231	0.5321	0.0454	0.1185	N/A	N/A	N/A
30229346	Pavir.Ea01855.1	3359	3	-0.905088	0.534	0.0066	0.0246	protein.degradation.cysteine protease	AT1G62710.1	beta vacuolar processing enzyme
30272241	Pavir.J13317.1	5246	1	-0.903738	0.5345	0.0029	0.0123	not assigned.no ontology.BSD domain-containing protein	AT1G03350.1	BSD domain-containing protein
30225960	Pavir.Ea03723.1	2389	1	-0.901042	0.5355	0.1456	0.2855	nucleotide metabolism.phosphotransfer and pyrophosphatases.misc	AT2G46860.1	pyrophosphorylase 3
30312760	Pavir.Eb02168.1	5548	1	-0.899157	0.5362	0.0591	0.1451	secondary metabolism.flavonoids.dihydroflavonols	AT1G01390.1	UDP-Glycosyltransferase superfamily protein
30228858	Pavir.Ea02629.1	2810	10	-0.893786	0.5382	<.0001	<.0001	secondary metabolism.sulfur-containing.misc.alliinase	AT1G34060.1	Pyridoxal phosphate (PLP)-dependent transferases superfamily protein
30258311	Pavir.J19993.1	3781	4	-0.891911	0.5389	<.0001	<.0001	signalling.receptor kinases.leucine rich repeat X	AT3G28450.1	Leucine-rich repeat protein kinase family protein
30227401	Pavir.Ea02412.1	1423	14	-0.890305	0.5395	<.0001	<.0001	secondary metabolism.flavonoids.dihydroflavonols.dihydroflavonol 4-reductase	AT5G42800.1	dihydroflavonol 4-reductase
30210620	Pavir.Ia04357.1	4860	1	-0.890038	0.5396	0.0132	0.0435	not assigned.no ontology	AT5G21950.1	alpha/beta-Hydrolases superfamily protein
30235445	Pavir.Ab00954.1	2476	8	-0.886833	0.5408	<.0001	<.0001	glycolysis.cytosolic branch.phospho-enol-pyruvate carboxylase (PEPC)	AT3G14940.1	phosphoenolpyruvate carboxylase 3
30257904	Pavir.J27567.1	5613	1	-0.884967	0.5415	0.0523	0.1323	stress.biotic	AT3G11660.1	NDR1/HIN1-like 1
30300847	Pavir.Bb02343.1	5198	1	-0.884168	0.5418	0.2186	0.3783	N/A	AT3G48690.1	alpha/beta-Hydrolases superfamily protein
30297273	Pavir.Bb02052.1	3024	5	-0.879648	0.5435	0.0002	0.0012	development.unspecified	AT1G78020.1	Protein of unknown function (DUF581)
30208775	Pavir.J38412.1	4611	2	-0.875143	0.5452	<.0001	<.0001	secondary metabolism.phenylpropanoids.lignin biosynthesis.4CL	AT1G65060.1	4-coumarate:CoA ligase 3
30239692	Pavir.Ib00061.1	602	28	-0.874878	0.5453	<.0001	<.0001	protein.synthesis.elongation	AT3G49470.1	nascent polypeptide-associated complex subunit alpha-like protein 2
30255468	Pavir.J03649.1	3868	3	-0.873027	0.546	<.0001	<.0001	not assigned.no ontology.ABC1 family protein	AT3G24190.1	Protein kinase superfamily protein
30263309	Pavir.J00252.1	4215	5	-0.872499	0.5462	<.0001	<.0001	secondary metabolism.flavonoids.flavonols.flavonol synthase (FLS)	AT5G08640.1	flavonol synthase 1
30209765	Pavir.Ia00660.1	1318	13	-0.872235	0.5463	<.0001	<.0001	N/A	AT3G07030.1	Alba DNA/RNA-binding protein
30230206	Pavir.Ea00813.1	238	2	-0.870915	0.5468	0.0943	0.2055	amino acid metabolism.synthesis.serine-glycine-cysteine group.cysteine.OASTL	AT2G43750.1	O-acetylserine (thiol) lyase B
30235309	Pavir.Ab00296.1	1597	15	-0.863021	0.5498	<.0001	<.0001	N/A	N/A	N/A
30250814	Pavir.Aa01371.1	1158	10	-0.857521	0.5519	<.0001	<.0001	N/A	AT5G17710.2	Co-chaperone GrpE family protein
30259670	Pavir.J04053.1	5211	3	-0.856998	0.5521	<.0001	<.0001	N/A	AT1G80120.1	Protein of unknown function (DUF567)
30297743	Pavir.Bb03603.1	826	6	-0.855693	0.5526	<.0001	<.0001	misc.peroxidases	AT5G05340.1	Peroxidase superfamily protein
30224950	Pavir.J11223.1	4223	3	-0.841922	0.5579	0.0002	0.0012	misc.peroxidases	AT5G05340.1	Peroxidase superfamily protein
30310360	Pavir.Eb01351.1	1422	7	-0.835214	0.5605	<.0001	<.0001	protein.postranslational modification	AT4G27800.1	thylakoid-associated phosphatase 38
30225404	Pavir.J14834.1	4386	1	-0.832642	0.5615	0.1749	0.3242	nucleotide metabolism.synthesis.purine.SAICAR synthetase	AT3G21110.1	purin 7
30295519	Pavir.J12221.1	4876	1	-0.831871	0.5618	0.0282	0.0813	N/A	AT1G26355.1	SPIRAL1-like1
30293518	Pavir.Ba01986.1	4555	1	-0.821891	0.5657	0.0397	0.1067	stress.abiotic.heat	AT2G01710.1	Chaperone DnaJ-domain superfamily protein
30187802	Pavir.Fa00633.1	4235	3	-0.821381	0.5659	<.0001	<.0001	RNA.regulation of transcription.HB Homeobox transcription factor family	AT4G40060.1	homeobox protein 16
30214623	Pavir.Ia00442.1	3398	1	-0.805913	0.572	0.0115	0.0388	cell.organisation	AT4G14960.2	Tubulin/FtsZ family protein
30244558	Pavir.J23107.1	1397	11	-0.803393	0.573	<.0001	<.0001	mitochondrial electron transport / ATP synthesis.uncoupling protein	AT4G24570.1	dicarboxylate carrier 2
30304502	Pavir.Ga01385.1	2348	2	-0.802638	0.5733	<.0001	<.0001	not assigned.no ontology	AT3G11330.1	plant intracellular ras group-related LRR 9
30212572	Pavir.Ia02721.1	4652	1	-0.802135	0.5735	0.0028	0.0119	N/A	N/A	N/A
30233488	Pavir.Ab02256.1	2385	1	-0.797614	0.5753	0.0141	0.0457	RNA.regulation of transcription.unclassified	AT4G32720.1	La protein 1
30185341	Pavir.J01370.1	4019	2	-0.792857	0.5772	0.0002	0.0012	N/A	AT3G19550.1	N/A
30251195	Pavir.Aa03374.1	4025	3	-0.790609	0.5781	0.0004	0.0022	lipid metabolism.Phospholipid synthesis.choline-phosphate cytidylyltransferase	AT2G32260.1	phosphorylcholine cytidylyltransferase
30300176	Pavir.Bb03675.1	903	14	-0.787866	0.5792	<.0001	<.0001	not assigned.no ontology	AT3G05500.1	Rubber elongation factor protein (REF)
30317231	Pavir.Ha00402.1	5025	1	-0.786124	0.5799	0.0036	0.0148	signalling.receptor kinases.DUF 26	AT4G23160.1	cysteine-rich RLK (RECEPTOR-like protein kinase) 8
30268629	Pavir.Cb01454.1	378	7	-0.781405	0.5818	<.0001	<.0001	N/A	AT5G12470.1	Protein of unknown function (DUF3411)
30293868	Pavir.Ba02582.1	4621	1	-0.780661	0.5821	0.0114	0.0385	transport.ABC transporters and multidrug resistance systems	AT1G15520.1	pleiotropic drug resistance 12
30197876	Pavir.J34443.1	2591	3	-0.775713	0.5841	<.0001	<.0001	protein.synthesis.ribosomal protein.prokaryotic.unknown organellar.30S subunit.S1	AT1G71720.1	Nucleic acid-binding proteins superfamily
30222382	Pavir.Gb00127.1	3711	2	-0.773491	0.585	<.0001	<.0001	cell.division	AT1G19880.1	Regulator of chromosome condensation (RCC1) family protein
30211963	Pavir.Ia00503.1	5499	1	-0.771027	0.586	0.0665	0.1588	not assigned.no ontology	AT1G17210.1	IAP-like protein 1
30262158	Pavir.Db00648.1	1163	2	-0.771027	0.586	<.0001	<.0001	RNA.regulation of transcription.HB Homeobox transcription factor family	AT5G25220.1	KNOTTED1-like homeobox gene 3
30313819	Pavir.Eb00984.1	3718	5	-0.771027	0.586	<.0001	<.0001	secondary metabolism.phenylpropanoids	AT4G35160.1	O-methyltransferase family protein
30230850	Pavir.Ea01021.1	5259	1	-0.766848	0.5877	0.0427	0.1131	not assigned.no ontology	AT4G05220.1	Late embryogenesis abundant (LEA) hydroxyproline-rich glycoprotein family
30252137	Pavir.Aa01399.1	4407	1	-0.763416	0.5891	0.0114	0.0385	protein.postranslational modification	AT2G31800.1	Integrin-linked protein kinase family
30253832	Pavir.Aa01044.1	3381	3	-0.762192	0.5896	<.0001	<.0001	hormone metabolism.abscisic acid.synthesis-degradation.synthesis.9-cis-epoxycarotenoid dioxygenase	AT4G19170.1	nine-cis-epoxycarotenoid dioxygenase 4
30285468	Pavir.J26103.1	5447	1	-0.759747	0.5906	0.0589	0.1448	N/A	N/A	N/A
30226896	Pavir.Ea00465.1	2268	5	-0.753409	0.5932	<.0001	<.0001	RNA.processing.splicing	AT2G37340.1	arginine/serine-rich zinc knuckle-containing protein 33
30294237	Pavir.J06822.1	3865	5	-0.750009	0.5946	<.0001	<.0001	major CHO metabolism.synthesis.starch.starch synthase	AT5G24300.1	Glycogen/starch synthases, ADP-glucose type
30299021	Pavir.Bb00317.1	1018	24	-0.740818	0.5984	<.0001	<.0001	N/A	AT3G52380.1	chloroplast RNA-binding protein 33
30256310	Pavir.J12246.1	5614	1	-0.739613	0.5989	0.0144	0.0464	N/A	AT5G17070.1	N/A
30282875	Pavir.J33316.1	3194	9	-0.739131	0.5991	<.0001	<.0001	protein.degradation.aspartate protease	AT2G03200.1	Eukaryotic aspartyl protease family protein
30290691	Pavir.Ba00494.1	1327	16	-0.73889	0.5992	<.0001	<.0001	mitochondrial electron transport / ATP synthesis.cytochrome c oxidase	AT1G22450.1	cytochrome C oxidase 6B
30290048	Pavir.Ba03442.1	2449	2	-0.73889	0.5992	0.0022	0.0098	RNA.processing	AT1G08370.1	decapping 1
30310101	Pavir.Eb03282.1	4247	4	-0.738168	0.5995	<.0001	<.0001	N/A	AT1G16520.1	N/A
30266504	Pavir.Hb00623.1	4898	4	-0.737928	0.5996	<.0001	<.0001	not assigned.no ontology	AT5G12410.1	THUMP domain-containing protein
30310296	Pavir.Eb03467.1	2718	2	-0.736244	0.6003	0.0192	0.059	protein.degradation	AT1G79330.1	metacaspase 5
30290799	Pavir.Ba03005.1	5374	1	-0.731685	0.6022	0.1333	0.2685	misc.acid and other phosphatases	AT1G15080.1	lipid phosphate phosphatase 2
30244370	Pavir.J34802.1	4676	2	-0.730249	0.6028	0.0001	0.0006	cell.organisation	AT5G19780.1	tubulin alpha-5
30302322	Pavir.Ga02657.1	4203	2	-0.728813	0.6034	0.0056	0.0215	hormone metabolism.brassinosteroid.synthesis-degradation.sterols.SMT2	AT5G13710.1	sterol methyltransferase 1
30197651	Pavir.J21371.1	3097	4	-0.726424	0.6044	0.0018	0.0082	misc.glutathione S transferases	AT3G62760.1	Glutathione S-transferase family protein
30264828	Pavir.Hb00621.1	2481	7	-0.724516	0.6052	<.0001	<.0001	N/A	AT2G35880.1	TPX2 (targeting protein for Xklp2) protein family
30227615	Pavir.Ea03573.1	4061	7	-0.724516	0.6052	<.0001	<.0001	N/A	AT2G30695.1	N/A
30258280	Pavir.J00476.1	3172	3	-0.719519	0.6073	<.0001	<.0001	not assigned.no ontology	AT5G38520.1	alpha/beta-Hydrolases superfamily protein
30230120	Pavir.Ea01062.1	1663	2	-0.718094	0.6079	0.0002	0.0012	cell.organisation	AT5G12250.1	beta-6 tubulin
30270364	Pavir.Cb01123.1	2158	2	-0.71762	0.6081	0.008	0.0287	secondary metabolism.isoprenoids.terpenoids	AT1G78510.1	solanesyl diphosphate synthase 1
30264004	Pavir.J01285.1	2366	5	-0.717382	0.6082	<.0001	<.0001	stress.abiotic.unspecified	AT1G18970.1	germin-like protein 4
30276414	Pavir.J15843.1	4298	3	-0.716908	0.6084	0.0057	0.0218	signalling.calcium	AT1G05990.1	EF hand calcium-binding protein family
30240729	Pavir.Ib03783.1	1114	31	-0.71596	0.6088	<.0001	<.0001	protein.synthesis.ribosomal protein.prokaryotic.chloroplast.30S subunit.S5	AT2G33800.1	Ribosomal protein S5 family protein
30195289	Pavir.J26830.1	5582	1	-0.713829	0.6097	0.1053	0.2237	N/A	N/A	N/A
30236602	Pavir.Ab02260.1	3539	6	-0.712173	0.6104	<.0001	<.0001	N/A	AT3G08010.1	RNA binding
30238447	Pavir.Ib00976.1	5352	1	-0.707218	0.6125	0.0001	0.0006	misc.peroxidases	AT5G19890.1	Peroxidase superfamily protein
30241982	Pavir.Ib00720.1	1591	2	-0.70557	0.6132	0.0574	0.1421	development.unspecified	AT2G03440.1	nodulin-related protein 1
30251480	Pavir.Aa00181.1	1973	10	-0.703924	0.6139	<.0001	<.0001	transport.H+ transporting pyrophosphatase	AT1G15690.1	Inorganic H pyrophosphatase family protein
30287678	Pavir.J01827.1	2608	7	-0.698295	0.6163	<.0001	<.0001	protein.synthesis.elongation	AT3G12390.1	Nascent polypeptide-associated complex (NAC), alpha subunit family protein
30210648	Pavir.Ia02037.1	3858	2	-0.696891	0.6169	<.0001	<.0001	N/A	AT5G09960.1	N/A
30258334	Pavir.J01147.1	2568	3	-0.695956	0.6173	<.0001	<.0001	N/A	AT3G07030.1	Alba DNA/RNA-binding protein
30189239	Pavir.J38370.1	5301	2	-0.692688	0.6187	0.0012	0.0058	signalling.calcium	AT3G52290.1	IQ-domain 3
30305043	Pavir.Ga00973.1	5088	3	-0.692688	0.6187	<.0001	<.0001	N/A	AT2G46100.1	Nuclear transport factor 2 (NTF2) family protein
30264292	Pavir.Hb00067.1	3160	6	-0.692455	0.6188	<.0001	<.0001	development.unspecified	AT1G66330.1	senescence-associated family protein
30203657	Pavir.Ca02805.1	2367	1	-0.690824	0.6195	0.0682	0.1617	protein.degradation	AT5G09640.1	serine carboxypeptidase-like 19
30274627	Pavir.J07465.1	3797	3	-0.688264	0.6206	0.0012	0.0058	N/A	AT4G24370.1	N/A
30257159	Pavir.J09775.1	4369	4	-0.6878	0.6208	<.0001	<.0001	N/A	AT4G38225.3	N/A
30234681	Pavir.Ab03022.1	4645	1	-0.68571	0.6217	0.2001	0.3557	not assigned.no ontology.BSD domain-containing protein	AT1G26300.1	BSD domain-containing protein
30263775	Pavir.J32574.1	2781	2	-0.685477	0.6218	0.0099	0.0343	misc.short chain dehydrogenase/reductase (SDR)	AT3G61220.1	NAD(P)-binding Rossmann-fold superfamily protein
30250291	Pavir.Aa03358.1	320	62	-0.684318	0.6223	<.0001	<.0001	N/A	ATCG01060.1	iron-sulfur cluster binding;electron carriers;4 iron, 4 sulfur cluster binding
30250827	Pavir.Aa00252.1	3843	2	-0.683159	0.6228	0.0007	0.0036	lipid metabolism.Phospholipid synthesis.diacylglycerol kinase	AT4G30340.1	diacylglycerol kinase 7
30206918	Pavir.Ca01816.1	3343	6	-0.682001	0.6233	<.0001	<.0001	PS.lightreaction.state transition	AT1G68830.1	STT7 homolog STN7
30300507	Pavir.Bb00154.1	4128	1	-0.67992	0.6242	0.118	0.2441	not assigned.no ontology.tetratricopeptide repeat (TPR)	AT4G37210.1	Tetratricopeptide repeat (TPR)-like superfamily protein
30214955	Pavir.Ia01316.1	2660	1	-0.678534	0.6248	0.0245	0.0724	major CHO metabolism.degradation.sucrose.fructokinase	AT1G69200.1	fructokinase-like 2
30212277	Pavir.Ia00147.1	4467	2	-0.676918	0.6255	0.0105	0.036	signalling.G-proteins	AT5G18570.1	GTP1/OBG family protein
30262479	Pavir.Db01835.1	5123	1	-0.675996	0.6259	0.0242	0.0717	not assigned.no ontology.glycine rich proteins	AT2G15780.1	Cupredoxin superfamily protein
30277950	Pavir.J20423.1	5269	2	-0.675535	0.6261	0.2271	0.3891	N/A	AT3G18170.1	Glycosyltransferase family 61 protein
30224959	Pavir.J17345.1	5150	2	-0.674844	0.6264	0.0323	0.0906	protein.postranslational modification	AT1G27070.1	5\'-AMP-activated protein kinase-related
30192865	Pavir.Da00479.1	5450	1	-0.673693	0.6269	0.0798	0.1815	protein.degradation	AT4G04210.1	plant UBX domain containing protein 4
30295130	Pavir.J12637.1	1257	5	-0.670704	0.6282	<.0001	<.0001	stress.abiotic.heat	AT1G21080.1	DNAJ heat shock N-terminal domain-containing protein
30257775	Pavir.J22104.1	4870	2	-0.670475	0.6283	0.0061	0.023	N/A	N/A	N/A
30244280	Pavir.J19997.1	1892	2	-0.670015	0.6285	0.0022	0.0098	lipid metabolism.lipid degradation.lysophospholipases	AT4G38690.1	PLC-like phosphodiesterases superfamily protein
30288611	Pavir.Ba00973.1	2321	9	-0.668409	0.6292	<.0001	<.0001	protein.aa activation.asparagine-tRNA ligase	AT4G17300.1	Class II aminoacyl-tRNA and biotin synthetases superfamily protein
30301238	Pavir.Bb02605.1	5545	1	-0.667263	0.6297	0.0901	0.1984	not assigned.no ontology	AT1G30910.1	Molybdenum cofactor sulfurase family protein
30299610	Pavir.Bb01095.1	5379	1	-0.666576	0.63	0.0189	0.0583	transport.potassium	AT5G41330.1	BTB/POZ domain with WD40/YVTN repeat-like protein
30240377	Pavir.Ib04023.1	5604	1	-0.666347	0.6301	0.0687	0.1623	RNA.regulation of transcription.unclassified	AT4G20380.2	LSD1 zinc finger family protein
30233576	Pavir.Ab00511.1	4836	1	-0.666347	0.6301	0.0737	0.1703	N/A	AT2G19270.1	N/A
30280088	Pavir.Fb01942.1	4954	2	-0.666118	0.6302	<.0001	<.0001	N/A	AT3G57990.1	N/A
30208002	Pavir.J27089.1	4706	3	-0.664288	0.631	0.0002	0.0012	N/A	AT5G05200.1	Protein kinase superfamily protein
30300129	Pavir.Bb00728.1	1505	9	-0.664059	0.6311	<.0001	<.0001	RNA.processing	AT1G08370.1	decapping 1
30267280	Pavir.J21391.1	3187	3	-0.661319	0.6323	0.0002	0.0012	hormone metabolism.jasmonate.synthesis-degradation.12-Oxo-PDA-reductase	AT1G76690.1	12-oxophytodienoate reductase 2
30217537	Pavir.J36207.1	3077	4	-0.661091	0.6324	<.0001	<.0001	secondary metabolism.phenylpropanoids.lignin biosynthesis.4CL	AT1G51680.1	4-coumarate:CoA ligase 1
30301723	Pavir.J20535.1	2749	6	-0.660178	0.6328	0.0017	0.0078	N/A	AT1G15230.1	N/A
30194517	Pavir.Da00552.1	5180	2	-0.659495	0.6331	0.0021	0.0094	N/A	AT5G11270.1	overexpressor of cationic peroxidase 3
30244149	Pavir.J40233.1	2855	8	-0.65699	0.6342	<.0001	<.0001	N/A	N/A	N/A
30205557	Pavir.Ca01412.1	412	8	-0.656308	0.6345	<.0001	<.0001	N/A	AT5G12470.1	Protein of unknown function (DUF3411)
30239112	Pavir.Ib03466.1	3158	2	-0.654717	0.6352	0.0005	0.0027	not assigned.no ontology	AT5G43850.1	RmlC-like cupins superfamily protein
30215920	Pavir.Ia02169.1	3714	2	-0.654263	0.6354	0.043	0.1136	misc.oxidases - copper flavone etc	AT1G63370.1	Flavin-binding monooxygenase family protein
30290589	Pavir.Ba01545.1	4049	2	-0.652448	0.6362	0.0246	0.0726	RNA.regulation of transcription.unclassified	AT3G26935.1	DHHC-type zinc finger family protein
30238568	Pavir.Ib00038.1	219	78	-0.651541	0.6366	<.0001	<.0001	DNA.synthesis/chromatin structure.histone.core.H4	AT3G53730.1	Histone superfamily protein
30215621	Pavir.Ia01895.1	5522	1	-0.649729	0.6374	0.0202	0.0614	stress.abiotic.heat	AT5G04890.1	HSP20-like chaperones superfamily protein
30213571	Pavir.Ia00714.1	4336	1	-0.649503	0.6375	0.0269	0.0782	N/A	AT5G65840.1	Thioredoxin superfamily protein
30210105	Pavir.Ia00502.1	3416	4	-0.648598	0.6379	0.0044	0.0176	RNA.regulation of transcription.unclassified	AT2G34620.1	Mitochondrial transcription termination factor family protein
30293090	Pavir.Ba00050.1	1653	1	-0.646564	0.6388	0.0748	0.1721	protein.degradation.ubiquitin.ubiquitin	AT5G57860.1	Ubiquitin-like superfamily protein
30213618	Pavir.Ia00568.1	5381	1	-0.645209	0.6394	0.0104	0.0358	N/A	AT1G55370.1	NDH-dependent cyclic electron flow 5
30188379	Pavir.Fa00493.1	3509	1	-0.643631	0.6401	0.2035	0.3594	RNA.regulation of transcription.bHLH Basic Helix-Loop-Helix family	AT2G42280.1	basic helix-loop-helix (bHLH) DNA-binding superfamily protein
30313994	Pavir.Eb01858.1	1152	10	-0.642279	0.6407	<.0001	<.0001	protein.targeting.chloroplast	AT4G02510.1	translocon at the outer envelope membrane of chloroplasts 159
30300220	Pavir.Bb00586.1	5212	1	-0.640254	0.6416	0.0228	0.0681	protein.degradation.subtilases	AT4G10540.1	Subtilase family protein
30188229	Pavir.Fa00160.1	2642	13	-0.63958	0.6419	<.0001	<.0001	N/A	AT1G27950.1	glycosylphosphatidylinositol-anchored lipid protein transfer 1
30230543	Pavir.Ea00508.1	4069	4	-0.638905	0.6422	0.0003	0.0017	RNA.regulation of transcription.unclassified	AT1G32130.1	Transcription elongation factor (TFIIS) family protein
30188151	Pavir.Fa00645.1	1994	10	-0.638456	0.6424	<.0001	<.0001	transport.metabolite transporters at the mitochondrial membrane	AT2G22500.1	uncoupling protein 5
30185788	Pavir.Fa02159.1	14	29	-0.636661	0.6432	<.0001	<.0001	nucleotide metabolism.phosphotransfer and pyrophosphatases.adenylate kinase	AT5G47840.1	adenosine monophosphate kinase
30212757	Pavir.Ia04864.1	5542	1	-0.635988	0.6435	0.4643	0.6283	N/A	N/A	N/A
30269396	Pavir.Cb00561.1	5227	1	-0.635764	0.6436	0.0623	0.151	mitochondrial electron transport / ATP synthesis.cytochrome c oxidase	AT2G47380.1	Cytochrome c oxidase subunit Vc family protein
30290339	Pavir.Ba02224.1	4164	3	-0.634867	0.644	0.0072	0.0263	N/A	AT4G31560.1	high chlorophyll fluorescence 153
30227678	Pavir.Ea00191.1	4251	2	-0.634867	0.644	0.0013	0.0062	N/A	AT3G14920.1	Peptide-N4-(N-acetyl-beta-glucosaminyl)asparagine amidase A protein
30188694	Pavir.Fa00603.1	4573	2	-0.634867	0.644	0.0897	0.1976	N/A	N/A	N/A
30202228	Pavir.J24487.1	5070	1	-0.632629	0.645	0.0092	0.0325	N/A	N/A	N/A
30224681	Pavir.Gb01117.1	3002	2	-0.632629	0.645	0.0013	0.0062	cell.organisation	AT4G00030.1	Plastid-lipid associated protein PAP / fibrillin family protein
30243732	Pavir.J04216.1	4211	1	-0.632182	0.6452	0.0445	0.1166	N/A	AT4G10080.1	N/A
30300910	Pavir.Bb03138.1	5135	1	-0.631511	0.6455	0.0882	0.1958	N/A	AT3G63170.1	Chalcone-flavanone isomerase family protein
30211062	Pavir.Ia02703.1	2582	5	-0.630841	0.6458	0.0034	0.0141	not assigned.no ontology	AT3G13200.1	Cwf15 / Cwc15 cell cycle control family protein
30290916	Pavir.Ba03250.1	3680	3	-0.625934	0.648	<.0001	<.0001	misc.GCN5-related N-acetyltransferase	AT1G72030.1	Acyl-CoA N-acyltransferases (NAT) superfamily protein
30211536	Pavir.Ia04917.1	5267	2	-0.622599	0.6495	0.0741	0.1709	not assigned.no ontology	AT3G21290.1	dentin sialophosphoprotein-related
30230338	Pavir.Ea00503.1	156	5	-0.620601	0.6504	0.0016	0.0074	glycolysis.cytosolic branch.triosephosphate isomerase (TPI)	AT3G55440.1	triosephosphate isomerase
30232287	Pavir.Ab03078.1	1584	20	-0.619049	0.6511	<.0001	<.0001	protein.targeting.chloroplast	AT3G52420.1	outer envelope membrane protein 7
30281874	Pavir.J03319.1	2397	2	-0.618827	0.6512	0.0429	0.1136	signalling.calcium	AT1G08450.1	calreticulin 3
30217222	Pavir.J00692.1	1156	26	-0.617499	0.6518	<.0001	<.0001	protein.degradation.subtilases	AT2G05920.1	Subtilase family protein
30299373	Pavir.Bb01314.1	3310	2	-0.616614	0.6522	0.0216	0.065	not assigned.no ontology	AT3G13200.1	Cwf15 / Cwc15 cell cycle control family protein
30274895	Pavir.J35267.1	2833	1	-0.612858	0.6539	0.1878	0.3411	not assigned.no ontology	AT1G33290.1	P-loop containing nucleoside triphosphate hydrolases superfamily protein
30239598	Pavir.Ib00478.1	697	35	-0.609332	0.6555	<.0001	<.0001	N/A	AT2G26340.1	N/A
30188133	Pavir.Fa01095.1	5557	1	-0.607573	0.6563	0.0669	0.1595	N/A	AT5G55210.1	N/A
30193086	Pavir.Da00290.1	3740	1	-0.607573	0.6563	0.1715	0.3198	cell.organisation	AT4G30160.2	villin 4
30271193	Pavir.J32877.1	3802	4	-0.607353	0.6564	0.1159	0.241	signalling.misc	AT4G15800.1	ralf-like 33
30266234	Pavir.Hb01685.1	2405	6	-0.606474	0.6568	<.0001	<.0001	signalling.calcium	AT4G09570.1	calcium-dependent protein kinase 4
30222788	Pavir.Gb02215.1	4918	2	-0.606254	0.6569	0.0001	0.0006	misc.UDP glucosyl and glucoronyl transferases	AT1G22360.1	UDP-glucosyl transferase 85A2
30210824	Pavir.Ia00572.1	579	6	-0.604498	0.6577	<.0001	<.0001	PS.lightreaction.photosystem II.PSII polypeptide subunits	AT1G05385.1	photosystem II 11 kDa protein-related
30209361	Pavir.Ia01708.1	5313	1	-0.603402	0.6582	0.0686	0.1621	protein.degradation.ubiquitin.E3.RING	AT2G45530.1	RING/U-box superfamily protein
30253917	Pavir.Aa00954.1	797	16	-0.600993	0.6593	<.0001	<.0001	DNA.synthesis/chromatin structure.histone.core.H4	AT5G59970.1	Histone superfamily protein
30291855	Pavir.Ba00282.1	3208	5	-0.600993	0.6593	<.0001	<.0001	signalling.in sugar and nutrient physiology.pyruvate dehydrogenase kinase	AT3G06483.1	pyruvate dehydrogenase kinase
30303340	Pavir.Ga00983.1	2152	19	-0.600337	0.6596	<.0001	<.0001	DNA.synthesis/chromatin structure.histone.H1	AT2G18050.1	histone H1-3
30233097	Pavir.Ab00644.1	1419	3	-0.599462	0.66	0.0025	0.0109	not assigned.no ontology	AT4G32190.1	Myosin heavy chain-related protein
30188408	Pavir.Fa00465.1	1218	2	-0.598588	0.6604	0.0086	0.0307	stress.abiotic.heat	AT1G21080.1	DNAJ heat shock N-terminal domain-containing protein
30192292	Pavir.Da01081.1	2176	4	-0.597278	0.661	<.0001	<.0001	not assigned.no ontology	AT2G34460.1	NAD(P)-binding Rossmann-fold superfamily protein
30186732	Pavir.Fa00066.1	929	31	-0.596623	0.6613	<.0001	<.0001	PS.lightreaction.cyclic electron flow-chlororespiration	AT2G05620.1	proton gradient regulation 5
30204866	Pavir.Ca00303.1	2929	3	-0.595097	0.662	0.0072	0.0263	N/A	N/A	N/A
30206365	Pavir.Ca02227.1	3931	6	-0.594661	0.6622	<.0001	<.0001	N/A	AT5G16720.1	Protein of unknown function, DUF593
30186523	Pavir.Fa00605.1	4399	4	-0.593137	0.6629	0.0031	0.013	RNA.processing.splicing	AT5G64200.1	ortholog of human splicing factor SC35
30217813	Pavir.J01524.1	4966	2	-0.593137	0.6629	0.0006	0.0032	not assigned.no ontology	AT3G10730.1	SAD1/UNC-84 domain protein 2
30305390	Pavir.Ga00876.1	542	13	-0.591832	0.6635	<.0001	<.0001	misc.short chain dehydrogenase/reductase (SDR)	AT3G61220.2	NAD(P)-binding Rossmann-fold superfamily protein
30208097	Pavir.J15391.1	3974	3	-0.590745	0.664	<.0001	<.0001	hormone metabolism.brassinosteroid.synthesis-degradation.sterols.DWF1	AT3G19820.1	cell elongation protein / DWARF1 / DIMINUTO (DIM)
30284624	Pavir.J02069.1	3894	2	-0.589876	0.6644	0.0188	0.058	N/A	AT3G48200.1	N/A
30261064	Pavir.Db01337.1	1635	10	-0.589008	0.6648	<.0001	<.0001	glycolysis.plastid branch.phosphoglucomutase (PGM)	AT1G70820.1	phosphoglucomutase, putative / glucose phosphomutase, putative
30238327	Pavir.Ib01619.1	2392	10	-0.587923	0.6653	<.0001	<.0001	not assigned.no ontology	AT3G06130.1	Heavy metal transport/detoxification superfamily protein
30191611	Pavir.Da00549.1	3371	2	-0.587706	0.6654	0.0001	0.0006	RNA.regulation of transcription.bZIP transcription factor family	AT5G11260.1	Basic-leucine zipper (bZIP) transcription factor family protein
30300744	Pavir.Bb02822.1	2827	6	-0.586406	0.666	<.0001	<.0001	S-assimilation.APR	AT4G21990.1	APS reductase 3
30303455	Pavir.Ga00730.1	4805	2	-0.584241	0.667	0.0229	0.0683	mitochondrial electron transport / ATP synthesis.alternative oxidase	AT3G22370.1	alternative oxidase 1A
30289222	Pavir.Ba02786.1	4185	1	-0.58208	0.668	0.0154	0.049	N/A	N/A	N/A
30226043	Pavir.Ea02601.1	1627	8	-0.580785	0.6686	<.0001	<.0001	PS.photorespiration.glycine cleavage.P subunit	AT2G26080.1	glycine decarboxylase P-protein 2
30233993	Pavir.Ab01767.1	3701	3	-0.580785	0.6686	<.0001	<.0001	RNA.regulation of transcription.AT-rich interaction domain containing transcription factor family	AT1G04880.1	HMG (high mobility group) box protein with ARID/BRIGHT DNA-binding domain
30303545	Pavir.Ga01034.1	5228	1	-0.580569	0.6687	0.0129	0.0427	signalling.calcium	AT1G76040.2	calcium-dependent protein kinase 29
30286803	Pavir.J23999.1	2724	10	-0.579922	0.669	<.0001	<.0001	minor CHO metabolism.others	AT1G04420.1	NAD(P)-linked oxidoreductase superfamily protein
30303555	Pavir.Ga00529.1	751	27	-0.579491	0.6692	<.0001	<.0001	RNA.regulation of transcription.putative transcription regulator	AT5G46640.1	AT hook motif DNA-binding family protein
30281243	Pavir.Fb01288.1	3898	4	-0.578844	0.6695	0.0011	0.0054	cell wall.cell wall proteins.AGPs.AGP	AT5G55730.1	FASCICLIN-like arabinogalactan 1
30213562	Pavir.Ia02091.1	4950	3	-0.578844	0.6695	0.0002	0.0012	misc.invertase/pectin methylesterase inhibitor family protein	AT5G62350.1	Plant invertase/pectin methylesterase inhibitor superfamily protein
30188324	Pavir.Fa00288.1	4988	1	-0.578629	0.6696	0.156	0.3004	protein.degradation.ubiquitin	AT1G04850.1	ubiquitin-associated (UBA)/TS-N domain-containing protein
30185077	Pavir.J02049.1	5422	1	-0.577767	0.67	0.1907	0.3442	N/A	AT3G13740.1	Ribonuclease III family protein
30224836	Pavir.Gb00472.1	4355	2	-0.577552	0.6701	0.001	0.0049	metal handling.binding chelation and storage	AT1G30470.1	SIT4 phosphatase-associated family protein
30308710	Pavir.Eb02202.1	1214	2	-0.576906	0.6704	0.0211	0.0638	protein.degradation.aspartate protease	AT1G62290.1	Saposin-like aspartyl protease family protein
30208150	Pavir.J34159.1	2214	3	-0.576906	0.6704	0.0156	0.0495	N/A	N/A	N/A
30186348	Pavir.Fa01109.1	3522	3	-0.575185	0.6712	0.0058	0.0221	N/A	AT5G38060.1	N/A
30272698	Pavir.J00951.1	2893	4	-0.573252	0.6721	0.0003	0.0017	RNA.regulation of transcription.B3 transcription factor family	AT5G58280.1	AP2/B3-like transcriptional factor family protein
30312840	Pavir.Eb01171.1	711	30	-0.571965	0.6727	0.0009	0.0045	PS.calvin cycle	AT3G62410.1	CP12 domain-containing protein 2
30233393	Pavir.Ab02271.1	1279	4	-0.571322	0.673	0.0077	0.0279	N/A	AT5G17710.2	Co-chaperone GrpE family protein
30312797	Pavir.Eb01151.1	1775	5	-0.571322	0.673	0.0026	0.0112	tetrapyrrole synthesis.magnesium-protoporphyrin IX monomethyl ester (oxidative) cyclase	AT3G56940.1	dicarboxylate diiron protein, putative (Crd1)
30279574	Pavir.Fb00122.1	13	29	-0.570893	0.6732	<.0001	<.0001	nucleotide metabolism.phosphotransfer and pyrophosphatases.adenylate kinase	AT5G47840.1	adenosine monophosphate kinase
30195928	Pavir.J10112.1	4683	1	-0.569394	0.6739	0.0811	0.1839	cell.organisation	AT4G19150.1	Ankyrin repeat family protein
30246245	Pavir.J32588.1	3088	5	-0.568965	0.6741	0.0065	0.0243	protein.degradation.AAA type	AT5G16930.1	AAA-type ATPase family protein
30197605	Pavir.J39140.1	3890	4	-0.568324	0.6744	0.0067	0.0249	not assigned.no ontology	AT1G14060.1	GCK domain-containing protein
30243934	Pavir.J07391.1	467	9	-0.567254	0.6749	0.089	0.1965	PS.calvin cycle	AT3G62410.1	CP12 domain-containing protein 2
30297666	Pavir.Bb02256.1	4472	3	-0.567254	0.6749	0.0003	0.0017	hormone metabolism.abscisic acid.signal transduction	AT5G20910.1	RING/U-box superfamily protein
30286485	Pavir.J16702.1	3504	4	-0.565332	0.6758	0.0001	0.0006	glycolysis.plastid branch.phosphoglucomutase (PGM)	AT1G70820.1	phosphoglucomutase, putative / glucose phosphomutase, putative
30200474	Pavir.J07772.1	2179	19	-0.563838	0.6765	<.0001	<.0001	N/A	ATCG00160.1	ribosomal protein S2
30291182	Pavir.Ba00834.1	4557	2	-0.563199	0.6768	0.0273	0.0792	signalling.calcium	AT3G20410.1	calmodulin-domain protein kinase 9
30225201	Pavir.J28422.1	4790	1	-0.560005	0.6783	0.0881	0.1958	OPP.oxidative PP.6-phosphogluconate dehydrogenase	AT4G29120.1	6-phosphogluconate dehydrogenase family protein
30268676	Pavir.Cb01481.1	3433	1	-0.559792	0.6784	0.0095	0.0333	cell.cycle.peptidylprolyl isomerase	AT5G35100.1	Cyclophilin-like peptidyl-prolyl cis-trans isomerase family protein
30273303	Pavir.J12212.1	3839	7	-0.558517	0.679	<.0001	<.0001	misc.peroxidases	AT5G15180.1	Peroxidase superfamily protein
30315277	Pavir.J21432.1	2227	6	-0.557879	0.6793	<.0001	<.0001	signalling.receptor kinases.leucine rich repeat III	AT1G48480.1	receptor-like kinase 1
30257384	Pavir.J09042.1	4356	1	-0.557667	0.6794	0.2038	0.3597	protein.synthesis.initiation	AT5G38640.1	NagB/RpiA/CoA transferase-like superfamily protein
30293541	Pavir.Ba00609.1	4538	3	-0.557667	0.6794	0.0045	0.0179	N/A	AT3G63170.1	Chalcone-flavanone isomerase family protein
30262041	Pavir.Db00653.1	293	77	-0.55703	0.6797	<.0001	<.0001	N/A	AT5G54770.1	thiazole biosynthetic enzyme, chloroplast (ARA6) (THI1) (THI4)
30208479	Pavir.J24789.1	4256	1	-0.556393	0.68	0.0172	0.054	misc.peroxidases	AT4G33420.1	Peroxidase superfamily protein
30199288	Pavir.J26499.1	5540	1	-0.555969	0.6802	0.055	0.138	N/A	N/A	N/A
30203675	Pavir.Ca01037.1	1801	7	-0.555969	0.6802	<.0001	<.0001	nucleotide metabolism.salvage.phosphoribosyltransferases.hgprt	AT1G71750.1	Hypoxanthine-guanine phosphoribosyltransferase
30234880	Pavir.Ab02078.1	1023	21	-0.555757	0.6803	<.0001	<.0001	lipid metabolism.lipid degradation.lysophospholipases.glycerophosphodiester phosphodiesterase	AT5G55480.1	SHV3-like 1
30297073	Pavir.Bb00485.1	2078	16	-0.555333	0.6805	<.0001	<.0001	DNA.synthesis/chromatin structure.histone.H1	AT1G06760.1	winged-helix DNA-binding transcription factor family protein
30185924	Pavir.Fa00632.1	3103	1	-0.554697	0.6808	0.1028	0.2197	RNA.regulation of transcription.putative transcription regulator	AT2G33620.1	AT hook motif DNA-binding family protein
30312435	Pavir.Eb01207.1	2725	7	-0.553638	0.6813	<.0001	<.0001	misc.peroxidases	AT4G33420.1	Peroxidase superfamily protein
30301409	Pavir.Bb02676.1	4051	5	-0.552368	0.6819	0.0001	0.0006	not assigned.no ontology.C2 domain-containing protein	AT2G20990.1	synaptotagmin A
30252958	Pavir.Aa01745.1	4620	1	-0.552156	0.682	0.1551	0.2991	N/A	AT3G18170.1	Glycosyltransferase family 61 protein
30202872	Pavir.J02534.1	235	4	-0.551733	0.6822	0.2275	0.3894	not assigned.no ontology	AT4G02530.1	chloroplast thylakoid lumen protein
30250845	Pavir.Aa01233.1	4347	1	-0.551522	0.6823	0.2272	0.3892	DNA.synthesis/chromatin structure	AT4G00660.1	RNAhelicase-like 8
30260482	Pavir.Db00270.1	1541	17	-0.550465	0.6828	<.0001	<.0001	transport.ABC transporters and multidrug resistance systems	AT1G67940.1	non-intrinsic ABC protein 3
30247754	Pavir.J13104.1	5144	2	-0.548565	0.6837	0.0004	0.0022	signalling.receptor kinases.S-locus glycoprotein like	AT4G21380.1	receptor kinase 3
30188358	Pavir.Fa00441.1	3975	3	-0.547932	0.684	<.0001	<.0001	signalling.receptor kinases	AT4G35470.1	plant intracellular ras group-related LRR 4
30239700	Pavir.Ib03894.1	2407	8	-0.547299	0.6843	<.0001	<.0001	amino acid metabolism.degradation.aspartate family.asparagine.L-asparaginase	AT5G08100.1	N-terminal nucleophile aminohydrolases (Ntn hydrolases) superfamily protein
30235090	Pavir.Ab00145.1	5573	1	-0.545824	0.685	0.0439	0.1153	N/A	AT5G60540.1	pyridoxine biosynthesis 2
30293132	Pavir.Ba01746.1	3852	13	-0.545614	0.6851	<.0001	<.0001	PS.lightreaction.photosystem I.PSI polypeptide subunits	AT1G55670.1	photosystem I subunit G
30309168	Pavir.Eb01754.1	4065	3	-0.544351	0.6857	0.0108	0.0369	cell.organisation	AT5G10470.2	kinesin like protein for actin based chloroplast movement 1
30236980	Pavir.Ib00446.1	3749	6	-0.543299	0.6862	<.0001	<.0001	RNA.regulation of transcription.C2C2(Zn) DOF zinc finger family	AT3G47500.1	cycling DOF factor 3
30253897	Pavir.Aa02779.1	1339	16	-0.542668	0.6865	<.0001	<.0001	misc.peroxidases	AT5G05340.1	Peroxidase superfamily protein
30223524	Pavir.Gb01732.1	1497	2	-0.542248	0.6867	0.0006	0.0032	not assigned.no ontology	AT2G33550.1	Homeodomain-like superfamily protein
30195882	Pavir.J18618.1	3946	1	-0.542038	0.6868	0.1209	0.2487	N/A	AT2G30170.1	Protein phosphatase 2C family protein
30239650	Pavir.Ib01857.1	2222	11	-0.540778	0.6874	<.0001	<.0001	DNA.synthesis/chromatin structure.histone.core.H3	AT4G40030.2	Histone superfamily protein
30303132	Pavir.Ga01483.1	5214	1	-0.53952	0.688	0.2198	0.3799	signalling.light	AT4G08920.1	cryptochrome 1
30228504	Pavir.Ea01307.1	3301	10	-0.53931	0.6881	<.0001	<.0001	N/A	AT3G05625.1	Tetratricopeptide repeat (TPR)-like superfamily protein
30312831	Pavir.Eb01085.1	4468	1	-0.538262	0.6886	0.0627	0.1516	transport.metabolite transporters at the mitochondrial membrane	AT5G01500.1	thylakoid ATP/ADP carrier
30259232	Pavir.J01579.1	5296	1	-0.538052	0.6887	0.0886	0.1962	DNA.synthesis/chromatin structure	AT5G62410.1	structural maintenance of chromosomes 2
30215687	Pavir.Ia01554.1	3994	2	-0.537424	0.689	0.0051	0.0199	stress.biotic	AT5G17540.1	HXXXD-type acyl-transferase family protein
30217133	Pavir.J40230.1	3435	3	-0.537424	0.689	0.0097	0.0338	N/A	N/A	N/A
30270168	Pavir.Cb01011.1	5098	1	-0.536796	0.6893	0.1111	0.2329	RNA.regulation of transcription.General Transcription	AT1G07480.1	Transcription factor IIA, alpha/beta subunit
30302558	Pavir.Ga00070.1	5541	1	-0.536796	0.6893	0.2545	0.4188	N/A	AT3G22210.1	N/A
30318292	Pavir.Ha01581.1	5391	1	-0.536168	0.6896	0.111	0.2328	RNA.regulation of transcription.B3 transcription factor family	AT3G18990.1	AP2/B3-like transcriptional factor family protein
30301293	Pavir.Bb03363.1	2460	6	-0.535332	0.69	0.0003	0.0017	amino acid metabolism.synthesis.aromatic aa.chorismate.3-deoxy-D-arabino-heptulosonate 7-phosphate synthase	AT1G22410.1	Class-II DAHP synthetase family protein
30308740	Pavir.Eb01150.1	4154	1	-0.534287	0.6905	0.1441	0.2834	signalling.light.COP9 signalosome	AT2G26990.1	proteasome family protein
30191141	Pavir.J10341.1	401	2	-0.533451	0.6909	0.0005	0.0027	metal handling.binding chelation and storage	AT3G17390.1	S-adenosylmethionine synthetase family protein
30297742	Pavir.Bb02804.1	4532	1	-0.53199	0.6916	0.2653	0.4309	not assigned.no ontology	AT3G05270.1	Plant protein of unknown function (DUF869)
30258564	Pavir.J09810.1	49	9	-0.531365	0.6919	<.0001	<.0001	mitochondrial electron transport / ATP synthesis.F1-ATPase	AT5G08670.1	ATP synthase alpha/beta family protein
30242960	Pavir.Ib04506.1	2530	4	-0.530114	0.6925	0.0061	0.023	secondary metabolism.flavonoids.chalcones.chalcone isomerase	AT3G55120.1	Chalcone-flavanone isomerase family protein
30306132	Pavir.J08783.1	5451	1	-0.529073	0.693	0.2739	0.4407	amino acid metabolism.synthesis.aromatic aa.tryptophan.anthranilate synthase	AT5G57890.1	Glutamine amidotransferase type 1 family protein
30253294	Pavir.Aa02966.1	3303	1	-0.528865	0.6931	0.0726	0.1686	RNA.regulation of transcription.bZIP transcription factor family	AT5G11260.1	Basic-leucine zipper (bZIP) transcription factor family protein
30278312	Pavir.Fb01003.1	3279	2	-0.5272	0.6939	0.0085	0.0303	not assigned.no ontology	AT5G13020.1	Emsy N Terminus (ENT)/ plant Tudor-like domains-containing protein
30234167	Pavir.Ab00129.1	3313	6	-0.526161	0.6944	<.0001	<.0001	N/A	AT1G32260.1	N/A
30225164	Pavir.J07322.1	4812	1	-0.525746	0.6946	0.0265	0.0772	redox.ascorbate and glutathione	AT4G18260.1	Cytochrome b561/ferric reductase transmembrane protein family
30310525	Pavir.Eb02683.1	1189	21	-0.52533	0.6948	<.0001	<.0001	protein.degradation	AT5G46390.2	Peptidase S41 family protein
30249067	Pavir.Aa00119.1	683	11	-0.52533	0.6948	<.0001	<.0001	N/A	N/A	N/A
30207061	Pavir.Ca01384.1	4670	3	-0.524915	0.695	0.0103	0.0355	protein.synthesis.ribosomal protein.prokaryotic.chloroplast.50S subunit.L22	AT1G52370.1	Ribosomal protein L22p/L17e family protein
30245425	Pavir.J11129.1	3782	4	-0.524708	0.6951	<.0001	<.0001	signalling.receptor kinases.leucine rich repeat VIII.VIII-1	AT1G06840.1	Leucine-rich repeat protein kinase family protein
30265840	Pavir.Hb01912.1	942	18	-0.5245	0.6952	<.0001	<.0001	RNA.regulation of transcription.HB Homeobox transcription factor family	AT2G35940.1	BEL1-like homeodomain 1
30286846	Pavir.J01083.1	1420	5	-0.523878	0.6955	<.0001	<.0001	misc.peroxidases	AT4G33420.1	Peroxidase superfamily protein
30233602	Pavir.Ab02263.1	3331	4	-0.523048	0.6959	0.0144	0.0464	mitochondrial electron transport / ATP synthesis.cytochrome c oxidase	AT1G22450.1	cytochrome C oxidase 6B
30278287	Pavir.Fb00835.1	3211	3	-0.522841	0.696	0.0457	0.1191	amino acid metabolism.synthesis.central amino acid metabolism.GABA.GABA transaminase	AT3G22200.1	Pyridoxal phosphate (PLP)-dependent transferases superfamily protein
30213801	Pavir.Ia00822.1	2604	11	-0.520562	0.6971	<.0001	<.0001	not assigned.no ontology	AT1G15200.1	protein-protein interaction regulator family protein
30253827	Pavir.Aa01955.1	2830	7	-0.520149	0.6973	<.0001	<.0001	not assigned.no ontology.C2 domain-containing protein	AT1G20080.1	Calcium-dependent lipid-binding (CaLB domain) family protein
30253631	Pavir.Aa00450.1	3855	3	-0.519321	0.6977	<.0001	<.0001	N/A	AT3G20930.1	RNA-binding (RRM/RBD/RNP motifs) family protein
30193277	Pavir.Da00029.1	1232	16	-0.519321	0.6977	<.0001	<.0001	cell.organisation	AT5G62690.1	tubulin beta chain 2
30220251	Pavir.J15772.1	3071	1	-0.518701	0.698	0.0146	0.0468	RNA.regulation of transcription.Methyl binding domain proteins	AT5G35330.1	methyl-CPG-binding domain protein 02
30285279	Pavir.J06456.1	3063	4	-0.518701	0.698	<.0001	<.0001	N/A	AT1G09700.1	dsRNA-binding domain-like superfamily protein
30285106	Pavir.J19262.1	4100	3	-0.518701	0.698	0.0001	0.0006	N/A	AT2G32640.1	Lycopene beta/epsilon cyclase protein
30264706	Pavir.Hb01466.1	629	2	-0.517875	0.6984	0.0246	0.0726	protein.synthesis.ribosomal protein.eukaryotic.40S subunit.S5	AT2G37270.1	ribosomal protein 5B
30234523	Pavir.Ab00470.1	3573	2	-0.517668	0.6985	0.0182	0.0566	minor CHO metabolism.myo-inositol.inositol phosphatase	AT1G31190.1	myo-inositol monophosphatase like 1
30193803	Pavir.Da00014.1	5101	2	-0.517255	0.6987	0.002	0.009	stress.abiotic.cold	AT1G05260.1	Peroxidase superfamily protein
30213207	Pavir.Ia02656.1	4817	2	-0.516842	0.6989	0.0067	0.0249	stress.abiotic.heat	AT4G27670.1	heat shock protein 21
30277198	Pavir.J03131.1	3798	5	-0.516017	0.6993	<.0001	<.0001	RNA.regulation of transcription.TCP transcription factor family	AT3G27010.1	TEOSINTE BRANCHED 1, cycloidea, PCF (TCP)-domain family protein 20
30313903	Pavir.Eb01787.1	3234	4	-0.515398	0.6996	0.0364	0.0997	transport.metabolite transporters at the mitochondrial membrane	AT1G64220.1	translocase of outer membrane 7 kDa subunit 2
30244668	Pavir.J29111.1	3867	1	-0.514985	0.6998	0.0343	0.0951	not assigned.no ontology	AT5G16730.1	Plant protein of unknown function (DUF827)
30236939	Pavir.Ib00270.1	3589	6	-0.512102	0.7012	<.0001	<.0001	RNA.regulation of transcription.putative transcription regulator	AT1G20220.1	Alba DNA/RNA-binding protein
30218782	Pavir.J20729.1	1838	2	-0.512102	0.7012	0.0008	0.0041	protein.postranslational modification	AT4G25130.1	peptide met sulfoxide reductase 4
30242892	Pavir.Ib01770.1	4908	2	-0.511691	0.7014	0.0629	0.1519	N/A	AT3G21550.1	DUF679 domain membrane protein 2
30195068	Pavir.J26189.1	2581	2	-0.511279	0.7016	0.2707	0.437	N/A	AT5G02530.1	RNA-binding (RRM/RBD/RNP motifs) family protein
30213488	Pavir.Ia03589.1	1942	10	-0.510868	0.7018	<.0001	<.0001	signalling.G-proteins	AT5G58590.1	RAN binding protein 1
30191272	Pavir.J05710.1	4869	2	-0.509225	0.7026	<.0001	<.0001	transport.ABC transporters and multidrug resistance systems	AT4G25450.1	non-intrinsic ABC protein 8
30282000	Pavir.J00649.1	4899	2	-0.509019	0.7027	0.0768	0.176	not assigned.no ontology	AT1G05720.1	selenoprotein family protein
30298377	Pavir.Bb02818.1	3693	3	-0.508814	0.7028	<.0001	<.0001	N/A	N/A	N/A
30186741	Pavir.Fa00608.1	2132	4	-0.508198	0.7031	0.0028	0.0119	not assigned.no ontology	AT4G39970.1	Haloacid dehalogenase-like hydrolase (HAD) superfamily protein
30202723	Pavir.J40325.1	2016	6	-0.507788	0.7033	<.0001	<.0001	signalling.receptor kinases.leucine rich repeat III	AT2G26730.1	Leucine-rich repeat protein kinase family protein
30186418	Pavir.Fa00803.1	3609	7	-0.507378	0.7035	<.0001	<.0001	development.unspecified	AT1G56220.3	Dormancy/auxin associated family protein
30250557	Pavir.Aa01236.1	580	17	-0.506968	0.7037	<.0001	<.0001	redox.ascorbate and glutathione	AT3G48890.1	membrane-associated progesterone binding protein 3
30220841	Pavir.J27730.1	696	13	-0.506558	0.7039	<.0001	<.0001	signalling.calcium	AT5G61790.1	calnexin 1
30281388	Pavir.J00071.1	2820	1	-0.506148	0.7041	0.0655	0.157	misc.peroxidases	AT4G11290.1	Peroxidase superfamily protein
30246598	Pavir.J30741.1	680	14	-0.504714	0.7048	<.0001	<.0001	lipid metabolism.'exotics'(steroids. squalene etc)	AT4G36750.1	Quinone reductase family protein
30288599	Pavir.Ba03103.1	4515	4	-0.5041	0.7051	0.0015	0.007	protein.aa activation.histidine-tRNA ligase	AT3G46100.1	Histidyl-tRNA synthetase 1
30314610	Pavir.J38004.1	4423	2	-0.503078	0.7056	0.0172	0.054	cell.organisation	AT1G51110.1	Plastid-lipid associated protein PAP / fibrillin family protein
30264037	Pavir.J00968.1	4196	4	-0.502669	0.7058	<.0001	<.0001	N/A	AT1G34320.1	Protein of unknown function (DUF668)
30279995	Pavir.Fb01499.1	4638	3	-0.502464	0.7059	0.0683	0.1617	development.unspecified	AT1G56220.3	Dormancy/auxin associated family protein
30250823	Pavir.Aa00668.1	5241	2	-0.50226	0.706	0.0894	0.1971	RNA.regulation of transcription.unclassified	AT5G10770.1	Eukaryotic aspartyl protease family protein
30210025	Pavir.Ia01867.1	2319	3	-0.50226	0.706	0.1537	0.2975	N/A	AT2G16940.1	Splicing factor, CC1-like
30291680	Pavir.Ba02133.1	411	12	-0.501851	0.7062	0.0002	0.0012	redox.thioredoxin	AT1G76080.1	chloroplastic drought-induced stress protein of 32 kD
30227414	Pavir.Ea03919.1	1832	3	-0.501851	0.7062	0.0195	0.0597	protein.targeting.mitochondria	AT1G27390.1	translocase outer membrane 20-2
30310233	Pavir.Eb01170.1	5142	1	-0.500422	0.7069	0.1182	0.2445	mitochondrial electron transport / ATP synthesis.NADH-DH.complex I.carbonic anhydrase	AT1G19580.1	gamma carbonic anhydrase 1
30252135	Pavir.Aa00378.1	5261	2	-0.498994	0.7076	0.0986	0.2126	signalling.MAP kinases	AT3G21220.1	MAP kinase kinase 5
30232823	Pavir.Ab00364.1	2797	4	-0.498994	0.7076	0.0051	0.0199	N/A	AT2G43760.1	molybdopterin biosynthesis MoaE family protein
30249739	Pavir.Aa00032.1	3569	3	-0.49879	0.7077	0.0058	0.0221	protein.degradation	AT5G65620.1	Zincin-like metalloproteases family protein
30192175	Pavir.Da01086.1	4672	3	-0.497975	0.7081	0.0247	0.0728	N/A	AT1G20430.1	N/A
30191561	Pavir.Da01373.1	2599	3	-0.497771	0.7082	0.0003	0.0017	N/A	AT1G26110.2	decapping 5
30247217	Pavir.J06226.1	1619	17	-0.496549	0.7088	<.0001	<.0001	RNA.processing.RNA helicase	AT5G26742.1	DEAD box RNA helicase (RH3)
30186567	Pavir.Fa00880.1	788	10	-0.496549	0.7088	<.0001	<.0001	PS.lightreaction.photosystem I.LHC-I	AT3G47470.1	light-harvesting chlorophyll-protein complex I subunit A4
30188542	Pavir.Fa02211.1	4007	6	-0.496346	0.7089	<.0001	<.0001	N/A	AT4G00830.1	RNA-binding (RRM/RBD/RNP motifs) family protein
30230404	Pavir.Ea00566.1	4048	3	-0.496142	0.709	<.0001	<.0001	RNA.regulation of transcription.HB Homeobox transcription factor family	AT4G34610.1	BEL1-like homeodomain 6
30259971	Pavir.Db00930.1	3943	3	-0.496142	0.709	0.0028	0.0119	hormone metabolism.abscisic acid.induced-regulated-responsive-activated	AT1G74520.1	HVA22 homologue A
30292942	Pavir.Ba00540.1	5312	2	-0.495939	0.7091	0.0032	0.0133	not assigned.no ontology	AT5G19850.1	alpha/beta-Hydrolases superfamily protein
30290826	Pavir.Ba00168.1	325	48	-0.495939	0.7091	<.0001	<.0001	misc.peroxidases	AT5G05340.1	Peroxidase superfamily protein
30234415	Pavir.Ab00228.1	1351	12	-0.495939	0.7091	<.0001	<.0001	RNA.processing.splicing	AT5G52040.2	RNA-binding (RRM/RBD/RNP motifs) family protein
30242719	Pavir.Ib01492.1	5075	2	-0.495532	0.7093	0.0049	0.0193	cell wall.degradation.mannan-xylose-arabinose-fucose	AT3G10740.1	alpha-L-arabinofuranosidase 1
30285969	Pavir.J39304.1	2070	1	-0.493703	0.7102	0.0126	0.0418	secondary metabolism.isoprenoids.carotenoids	AT1G57770.1	FAD/NAD(P)-binding oxidoreductase family protein
30299682	Pavir.Bb00569.1	3299	7	-0.493703	0.7102	<.0001	<.0001	N/A	ATCG01110.1	NAD(P)H dehydrogenase subunit H
30242267	Pavir.Ib04384.1	4373	1	-0.4935	0.7103	0.0066	0.0246	signalling.receptor kinases.leucine rich repeat II	AT5G10290.1	leucine-rich repeat transmembrane protein kinase family protein
30236747	Pavir.J36164.1	4678	2	-0.4935	0.7103	0.0047	0.0186	RNA.regulation of transcription.C2H2 zinc finger family	AT5G57520.1	zinc finger protein 2
30204581	Pavir.Ca00644.1	712	14	-0.492484	0.7108	<.0001	<.0001	DNA.synthesis/chromatin structure.histone.core.H2A	AT5G02560.1	histone H2A 12
30291518	Pavir.Ba01954.1	2806	7	-0.492079	0.711	<.0001	<.0001	N/A	AT1G60000.1	RNA-binding (RRM/RBD/RNP motifs) family protein
30255418	Pavir.J21011.1	4834	1	-0.490456	0.7118	0.0432	0.1139	not assigned.no ontology.C2 domain-containing protein	AT1G63220.1	Calcium-dependent lipid-binding (CaLB domain) family protein
30233621	Pavir.Ab00020.1	1210	25	-0.490456	0.7118	<.0001	<.0001	not assigned.no ontology.pentatricopeptide (PPR) repeat-containing protein	AT4G22670.1	HSP70-interacting protein 1
30235576	Pavir.Ab01211.1	851	23	-0.490253	0.7119	<.0001	<.0001	misc.peroxidases	AT5G05340.1	Peroxidase superfamily protein
30238745	Pavir.Ib02411.1	4474	3	-0.488633	0.7127	0.0006	0.0032	misc.rhodanese	AT5G03455.1	Rhodanese/Cell cycle control phosphatase superfamily protein
30250510	Pavir.Aa00118.1	638	7	-0.487621	0.7132	<.0001	<.0001	protein.degradation.serine protease	AT4G17740.1	Peptidase S41 family protein
30273911	Pavir.J08211.1	3020	4	-0.486408	0.7138	0.0003	0.0017	RNA.regulation of transcription.HB Homeobox transcription factor family	AT2G23760.1	BEL1-like homeodomain 4
30221130	Pavir.J06703.1	3788	5	-0.486206	0.7139	0.0001	0.0006	nucleotide metabolism.phosphotransfer and pyrophosphatases.misc	AT4G29680.1	Alkaline-phosphatase-like family protein
30240992	Pavir.Ib01232.1	3487	4	-0.4856	0.7142	0.002	0.009	signalling.calcium	AT5G49480.1	Ca2+-binding protein 1
30292419	Pavir.Ba00366.1	3105	5	-0.4856	0.7142	<.0001	<.0001	protein.synthesis.ribosomal protein.eukaryotic.40S subunit.S9	AT5G39850.1	Ribosomal protein S4
30196320	Pavir.J25900.1	3080	3	-0.485398	0.7143	<.0001	<.0001	misc.peroxidases	AT4G33420.1	Peroxidase superfamily protein
30275471	Pavir.J02703.1	1261	2	-0.485398	0.7143	0.0773	0.177	PS.lightreaction.photosystem I.PSI polypeptide subunits	AT1G52230.1	photosystem I subunit H2
30245001	Pavir.J03853.1	5133	1	-0.485196	0.7144	0.203	0.3589	N/A	AT1G67785.1	N/A
30227271	Pavir.Ea00712.1	4054	6	-0.484994	0.7145	<.0001	<.0001	protein.aa activation.leucine-tRNA ligase	AT4G04350.1	tRNA synthetase class I (I, L, M and V) family protein
30240600	Pavir.Ib04498.1	1479	4	-0.484994	0.7145	0.0012	0.0058	RNA.processing	AT1G09760.1	U2 small nuclear ribonucleoprotein A
30292994	Pavir.Ba03951.1	3932	1	-0.484792	0.7146	0.1949	0.3494	not assigned.no ontology.tetratricopeptide repeat (TPR)	AT4G37210.1	Tetratricopeptide repeat (TPR)-like superfamily protein
30240898	Pavir.Ib00332.1	742	5	-0.484792	0.7146	0.0008	0.0041	misc.glutathione S transferases	AT2G30860.1	glutathione S-transferase PHI 9
30223882	Pavir.Gb00191.1	1617	14	-0.48459	0.7147	<.0001	<.0001	transport.p- and v-ATPases.H+-exporting ATPase	AT4G30190.1	H(+)-ATPase 2
30192569	Pavir.Da00216.1	5584	1	-0.484388	0.7148	0.147	0.2877	N/A	AT5G43400.1	Uncharacterised conserved protein UCP015417, vWA
30290517	Pavir.Ba01392.1	3905	6	-0.484388	0.7148	<.0001	<.0001	cell.organisation	AT1G42550.1	plastid movement impaired1
30309864	Pavir.Eb01816.1	3789	5	-0.483783	0.7151	0.0004	0.0022	N/A	N/A	N/A
30245863	Pavir.J14687.1	4064	2	-0.483581	0.7152	0.0053	0.0205	RNA.regulation of transcription.putative transcription regulator	AT4G39680.1	SAP domain-containing protein
30239995	Pavir.Ib00309.1	2395	1	-0.48338	0.7153	0.2048	0.361	N/A	AT2G16940.2	Splicing factor, CC1-like
30282096	Pavir.J08823.1	443	1	-0.482976	0.7155	0.209	0.3662	protein.synthesis.ribosomal protein.eukaryotic.60S subunit.P0	AT2G40010.1	Ribosomal protein L10 family protein
30211812	Pavir.Ia00240.1	1478	1	-0.482775	0.7156	0.0001	0.0006	nucleotide metabolism.degradation	AT5G28050.1	Cytidine/deoxycytidylate deaminase family protein
30312803	Pavir.Eb00088.1	5184	1	-0.482775	0.7156	0.0584	0.1438	misc.cytochrome P450	AT3G48280.1	cytochrome P450, family 71, subfamily A, polypeptide 25
30185142	Pavir.J00140.1	526	69	-0.48217	0.7159	<.0001	<.0001	protein.targeting.secretory pathway.unspecified	AT5G14670.1	ADP-ribosylation factor A1B
30274316	Pavir.J11666.1	4286	4	-0.48217	0.7159	0.0102	0.0352	misc.gluco- galacto- and mannosidases	AT5G36890.1	beta glucosidase 42
30212273	Pavir.Ia00185.1	1907	6	-0.48076	0.7166	0.0031	0.013	secondary metabolism.flavonoids.chalcones.chalcone isomerase	AT3G55120.1	Chalcone-flavanone isomerase family protein
30318201	Pavir.Ha00455.1	3930	6	-0.480357	0.7168	<.0001	<.0001	protein.degradation.ubiquitin.E3.SCF.FBOX	AT5G50270.1	F-box/RNI-like/FBD-like domains-containing protein
30222435	Pavir.Gb01565.1	5341	1	-0.480156	0.7169	0.1032	0.2203	cell.division	AT1G22260.1	Myosin heavy chain-related protein
30314169	Pavir.Eb00019.1	374	15	-0.479553	0.7172	0.0013	0.0062	signalling.phosphinositides	AT4G20260.5	plasma-membrane associated cation-binding protein 1
30188745	Pavir.Fa00016.1	3121	3	-0.478346	0.7178	0.007	0.0257	RNA.regulation of transcription.C2H2 zinc finger family	AT2G02070.1	indeterminate(ID)-domain 5
30284004	Pavir.J03001.1	1542	14	-0.478145	0.7179	<.0001	<.0001	transport.misc	AT1G80300.1	nucleotide transporter 1
30219928	Pavir.J38905.1	1486	17	-0.477944	0.718	<.0001	<.0001	N/A	ATCG00720.1	photosynthetic electron transfer B
30298010	Pavir.Bb00952.1	4263	3	-0.477342	0.7183	0.0032	0.0133	signalling.calcium	AT3G61050.1	Calcium-dependent lipid-binding (CaLB domain) family protein
30231024	Pavir.Ea00827.1	4513	1	-0.476538	0.7187	0.0573	0.1421	RNA.regulation of transcription.GeBP like	AT3G04930.1	DNA-binding storekeeper protein-related transcriptional regulator
30217391	Pavir.J18609.1	1411	22	-0.476538	0.7187	<.0001	<.0001	RNA.regulation of transcription.putative transcription regulator	AT2G41870.1	Remorin family protein
30308359	Pavir.J05379.1	2238	7	-0.475736	0.7191	<.0001	<.0001	N/A	AT4G25910.1	NFU domain protein 3
30302000	Pavir.J27210.1	5363	1	-0.474733	0.7196	0.0702	0.1649	PS.photorespiration.hydroxypyruvate reductase	AT1G12550.1	D-isomer specific 2-hydroxyacid dehydrogenase family protein
30298858	Pavir.Bb01740.1	4243	2	-0.474733	0.7196	0.0969	0.2098	protein.postranslational modification	AT1G16270.1	Protein kinase superfamily protein with octicosapeptide/Phox/Bem1p domain
30318153	Pavir.Ha01822.1	1167	15	-0.474532	0.7197	<.0001	<.0001	RNA.regulation of transcription.HB Homeobox transcription factor family	AT2G35940.1	BEL1-like homeodomain 1
30243497	Pavir.J07888.1	4687	1	-0.474132	0.7199	0.2486	0.4127	N/A	AT5G08400.2	Protein of unknown function (DUF3531)
30227045	Pavir.Ea00487.1	2984	3	-0.47293	0.7205	0.0001	0.0006	redox.ascorbate and glutathione.glutathione	AT4G29210.1	gamma-glutamyl transpeptidase 4
30229724	Pavir.Ea03478.1	5290	1	-0.472729	0.7206	0.0059	0.0224	transport.ABC transporters and multidrug resistance systems	AT1G70610.1	transporter associated with antigen processing protein 1
30191568	Pavir.Da01860.1	1924	12	-0.472729	0.7206	<.0001	<.0001	secondary metabolism.flavonoids.flavonols.flavonol-3-O-rhamnosyltransferase	AT5G17050.1	UDP-glucosyl transferase 78D2
30187777	Pavir.Fa00468.1	4799	1	-0.472329	0.7208	0.0002	0.0012	N/A	AT4G31115.1	Protein of unknown function (DUF1997)
30204254	Pavir.Ca00615.1	3351	4	-0.472129	0.7209	0.4255	0.5917	N/A	AT5G02160.1	N/A
30290196	Pavir.Ba01783.1	4485	2	-0.471929	0.721	0.0058	0.0221	N/A	AT5G60840.1	N/A
30228385	Pavir.Ea01634.1	3876	3	-0.471529	0.7212	0.0008	0.0041	misc.peroxidases	AT5G66390.1	Peroxidase superfamily protein
30188088	Pavir.Fa00193.1	1438	25	-0.467334	0.7233	<.0001	<.0001	N/A	AT4G24770.1	31-kDa RNA binding protein
30312900	Pavir.Eb01487.1	2641	13	-0.466736	0.7236	<.0001	<.0001	misc.glutathione S transferases	AT3G62760.1	Glutathione S-transferase family protein
30225373	Pavir.J34884.1	3429	8	-0.466536	0.7237	0.0008	0.0041	lipid metabolism.'exotics' (steroids. squalene etc).phosphatidylcholinesterol O-acyltransferase	AT1G27480.1	alpha/beta-Hydrolases superfamily protein
30227351	Pavir.Ea03905.1	4306	2	-0.466536	0.7237	0.0081	0.029	not assigned.no ontology	AT5G63490.1	CBS / octicosapeptide/Phox/Bemp1 (PB1) domains-containing protein
30219385	Pavir.J15841.1	1651	5	-0.465739	0.7241	0.001	0.0049	not assigned.no ontology	AT3G07170.1	Sterile alpha motif (SAM) domain-containing protein
30303871	Pavir.Ga01990.1	1125	37	-0.464743	0.7246	<.0001	<.0001	secondary metabolism.isoprenoids.carotenoids.violaxanthin de-epoxidase	AT1G08550.1	non-photochemical quenching 1
30289608	Pavir.Ba03987.1	2199	10	-0.464146	0.7249	<.0001	<.0001	protein.postranslational modification	AT5G67380.1	casein kinase alpha 1
30205489	Pavir.Ca00739.1	2507	2	-0.464146	0.7249	0.0724	0.1682	N/A	AT1G50732.1	N/A
30289865	Pavir.Ba00102.1	421	3	-0.463549	0.7252	0.0094	0.033	protein.synthesis.ribosomal protein.eukaryotic.60S subunit.P0	AT2G40010.1	Ribosomal protein L10 family protein
30200345	Pavir.J05468.1	2782	3	-0.463151	0.7254	0.001	0.0049	N/A	AT4G31530.1	NAD(P)-binding Rossmann-fold superfamily protein
30194083	Pavir.Da02267.1	3863	5	-0.461561	0.7262	0.001	0.0049	RNA.processing	AT4G34730.1	ribosome-binding factor A family protein
30233194	Pavir.Ab01954.1	2811	10	-0.460965	0.7265	<.0001	<.0001	signalling.calcium	AT5G57580.1	Calmodulin-binding protein
30264314	Pavir.Hb01244.1	3870	8	-0.460767	0.7266	0.0025	0.0109	N/A	AT1G32520.1	N/A
30202066	Pavir.J00423.1	2986	1	-0.459774	0.7271	0.0131	0.0432	N/A	AT3G10650.1	N/A
30220134	Pavir.J20521.1	5297	1	-0.459774	0.7271	0.1658	0.3132	N/A	N/A	N/A
30210111	Pavir.Ia04787.1	4518	2	-0.459179	0.7274	0.022	0.0661	N/A	AT2G26570.1	Plant protein of unknown function (DUF827)
30234090	Pavir.Ab00809.1	4700	3	-0.458981	0.7275	0.0017	0.0078	protein.postranslational modification	AT1G79630.1	Protein phosphatase 2C family protein
30279639	Pavir.Fb00477.1	3354	8	-0.458584	0.7277	<.0001	<.0001	N/A	N/A	N/A
30280383	Pavir.Fb00411.1	5248	1	-0.457791	0.7281	0.1406	0.2785	protein.degradation.ubiquitin.E3.RING	AT1G32360.1	Zinc finger (CCCH-type) family protein
30210143	Pavir.Ia01197.1	4153	5	-0.457791	0.7281	0.0008	0.0041	development.unspecified	AT5G58230.1	Transducin/WD40 repeat-like superfamily protein
30187107	Pavir.Fa02400.1	1440	12	-0.457593	0.7282	<.0001	<.0001	misc.GCN5-related N-acetyltransferase	AT1G26220.1	Acyl-CoA N-acyltransferases (NAT) superfamily protein
30238969	Pavir.Ib03607.1	3476	6	-0.457395	0.7283	0.0383	0.1039	protein.synthesis.ribosomal protein.prokaryotic.unknown organellar.30S subunit.S18	AT1G07210.1	Ribosomal protein S18
30292796	Pavir.Ba03378.1	2741	7	-0.457197	0.7284	<.0001	<.0001	N/A	AT5G05200.1	Protein kinase superfamily protein
30219824	Pavir.J05930.1	5359	1	-0.456603	0.7287	0.0432	0.1139	signalling.calcium	AT5G19450.1	calcium-dependent protein kinase 19
30208845	Pavir.J40478.1	1109	12	-0.456603	0.7287	0.0002	0.0012	N/A	AT2G26340.2	N/A
30209408	Pavir.Ia04318.1	3513	2	-0.456603	0.7287	0.0408	0.109	N/A	AT5G09960.1	N/A
30304879	Pavir.Ga02248.1	4856	1	-0.456405	0.7288	0.1407	0.2785	protein.postranslational modification	AT5G58140.1	phototropin 2
30250680	Pavir.Aa03301.1	4549	2	-0.456405	0.7288	0.0281	0.0811	protein.degradation.cysteine protease	AT1G50670.1	OTU-like cysteine protease family protein
30278788	Pavir.Fb00352.1	1436	14	-0.455614	0.7292	<.0001	<.0001	cell.vesicle transport	AT4G21450.1	PapD-like superfamily protein
30236919	Pavir.Ib01363.1	2229	7	-0.454822	0.7296	0.0006	0.0032	signalling.G-proteins	AT5G58590.1	RAN binding protein 1
30313180	Pavir.Eb01883.1	5412	1	-0.454625	0.7297	0.4109	0.5768	PS.lightreaction.photosystem I.LHC-I	AT1G34000.1	one-helix protein 2
30239425	Pavir.Ib01813.1	2365	6	-0.454625	0.7297	0.0116	0.039	major CHO metabolism.degradation.sucrose.Susy	AT3G43190.1	sucrose synthase 4
30215210	Pavir.Ia02827.1	4343	2	-0.454427	0.7298	0.0023	0.0102	not assigned.no ontology	AT1G14870.1	PLANT CADMIUM RESISTANCE 2
30284955	Pavir.J08750.1	2196	5	-0.454032	0.73	<.0001	<.0001	protein.targeting.secretory pathway.unspecified	AT4G09160.1	SEC14 cytosolic factor family protein / phosphoglyceride transfer family protein
30254087	Pavir.J02713.1	4968	3	-0.453044	0.7305	0.0439	0.1153	protein.postranslational modification	AT1G53050.1	Protein kinase superfamily protein
30252749	Pavir.Aa03160.1	1161	3	-0.452846	0.7306	0.0003	0.0017	RNA.regulation of transcription.HB Homeobox transcription factor family	AT5G25220.2	KNOTTED1-like homeobox gene 3
30301532	Pavir.Bb00399.1	5425	1	-0.45107	0.7315	0.2014	0.3573	RNA.regulation of transcription.PHD finger transcription factor	AT4G14920.1	Acyl-CoA N-acyltransferase with RING/FYVE/PHD-type zinc finger protein
30231077	Pavir.Ea03616.1	4641	3	-0.45107	0.7315	0.0002	0.0012	N/A	AT1G22850.1	SNARE associated Golgi protein family
30239269	Pavir.Ib03052.1	2790	7	-0.450873	0.7316	0.0042	0.0169	mitochondrial electron transport / ATP synthesis.NADH-DH.localisation not clear	AT3G03100.1	NADH:ubiquinone oxidoreductase, 17.2kDa subunit
30229196	Pavir.Ea02319.1	3955	5	-0.450873	0.7316	<.0001	<.0001	not assigned.no ontology	AT5G62840.1	Phosphoglycerate mutase family protein
30230384	Pavir.Ea01407.1	2862	14	-0.450676	0.7317	<.0001	<.0001	protein.aa activation.asparagine-tRNA ligase	AT5G56680.1	Class II aminoacyl-tRNA and biotin synthetases superfamily protein
30290272	Pavir.Ba02824.1	3364	1	-0.450479	0.7318	0.0419	0.1113	signalling.G-proteins	AT1G50300.1	TBP-associated factor 15
30232653	Pavir.Ab00650.1	4473	1	-0.449296	0.7324	0.0508	0.1291	misc.UDP glucosyl and glucoronyl transferases	AT4G15480.1	UDP-Glycosyltransferase superfamily protein
30300302	Pavir.Bb00338.1	5336	2	-0.449296	0.7324	0.0662	0.1584	protein.aa activation.valine-tRNA ligase	AT5G16715.1	ATP binding;valine-tRNA ligases;aminoacyl-tRNA ligases;nucleotide binding;ATP binding;aminoacyl-tRNA ligases
30254061	Pavir.J20022.1	5239	1	-0.448902	0.7326	0.0715	0.1666	N/A	AT2G11890.1	adenylate cyclases
30285945	Pavir.J27974.1	3319	2	-0.448902	0.7326	0.0003	0.0017	secondary metabolism.isoprenoids.carotenoids.lycopene beta cyclase	AT3G10230.1	lycopene cyclase
30210282	Pavir.Ia03166.1	1755	14	-0.448902	0.7326	<.0001	<.0001	RNA.regulation of transcription.putative transcription regulator	AT4G39680.1	SAP domain-containing protein
30303295	Pavir.Ga02311.1	4089	1	-0.448705	0.7327	0.2787	0.4461	N/A	AT3G15040.1	Protein of unknown function, DUF584
30208701	Pavir.J28247.1	5062	1	-0.447525	0.7333	0.0041	0.0166	secondary metabolism.phenylpropanoids.lignin biosynthesis.CCR1	AT5G58490.1	NAD(P)-binding Rossmann-fold superfamily protein
30209374	Pavir.Ia01557.1	1005	6	-0.447525	0.7333	0.002	0.009	redox.ascorbate and glutathione	AT5G52240.1	membrane steroid binding protein 1
30268587	Pavir.Cb00133.1	1737	10	-0.446345	0.7339	<.0001	<.0001	transport.p- and v-ATPases	AT5G62670.1	H(+)-ATPase 11
30271357	Pavir.J25902.1	4047	3	-0.446345	0.7339	0.0023	0.0102	secondary metabolism.flavonoids.dihydroflavonols	AT5G54010.1	UDP-Glycosyltransferase superfamily protein
30215797	Pavir.Ia00927.1	4296	1	-0.445558	0.7343	0.0122	0.0408	signalling.receptor kinases.leucine rich repeat II	AT5G10290.1	leucine-rich repeat transmembrane protein kinase family protein
30254558	Pavir.J00228.1	5446	1	-0.445558	0.7343	0.1148	0.2393	misc.UDP glucosyl and glucoronyl transferases	AT2G15480.2	UDP-glucosyl transferase 73B5
30229922	Pavir.Ea03604.1	2690	1	-0.445362	0.7344	0.0183	0.0568	N/A	AT2G48070.1	resistance to phytophthora 1
30253729	Pavir.Aa00082.1	5014	1	-0.445166	0.7345	0.4083	0.5748	not assigned.no ontology	AT5G04420.1	Galactose oxidase/kelch repeat superfamily protein
30257461	Pavir.J25131.1	3114	3	-0.443988	0.7351	0.0004	0.0022	not assigned.no ontology	AT4G39720.1	VQ motif-containing protein
30209548	Pavir.Ia03699.1	3254	5	-0.443399	0.7354	0.0001	0.0006	tetrapyrrole synthesis.divinyl chlorophyllide-a 8-vinyl-reductase	AT5G18660.1	NAD(P)-binding Rossmann-fold superfamily protein
30296018	Pavir.J05934.1	4780	1	-0.442222	0.736	0.2876	0.455	protein.degradation.serine protease	AT3G07950.1	rhomboid protein-related
30255288	Pavir.J27666.1	3986	3	-0.44183	0.7362	0.0175	0.0547	mitochondrial electron transport / ATP synthesis.NADH-DH.type II.internal matrix	AT1G07180.1	alternative NAD(P)H dehydrogenase 1
30304707	Pavir.Ga00526.1	4636	2	-0.441634	0.7363	0.0527	0.1331	lipid metabolism.FA synthesis and FA elongation.acyl coa ligase	AT3G48990.1	AMP-dependent synthetase and ligase family protein
30317850	Pavir.Ha01691.1	2049	18	-0.441243	0.7365	<.0001	<.0001	N/A	N/A	N/A
30265486	Pavir.Hb01725.1	4107	3	-0.440263	0.737	0.005	0.0196	hormone metabolism.gibberelin.synthesis-degradation	AT1G52820.1	2-oxoglutarate (2OG) and Fe(II)-dependent oxygenase superfamily protein
30201867	Pavir.J20529.1	1681	4	-0.440263	0.737	0.0007	0.0036	gluconeogenesis / glyoxylate cycle.Malate DH	AT5G09660.1	peroxisomal NAD-malate dehydrogenase 2
30293088	Pavir.Ba01978.1	777	9	-0.440263	0.737	<.0001	<.0001	glycolysis.plastid branch.glucose-6-phosphate isomerase	AT4G24620.1	phosphoglucose isomerase 1
30305071	Pavir.Ga00514.1	4146	3	-0.440068	0.7371	0.0067	0.0249	not assigned.no ontology.C2 domain-containing protein	AT1G63220.1	Calcium-dependent lipid-binding (CaLB domain) family protein
30185729	Pavir.Fa00616.1	5181	2	-0.440068	0.7371	0.013	0.043	signalling.in sugar and nutrient physiology	AT5G64260.1	EXORDIUM like 2
30290234	Pavir.Ba01572.1	2920	8	-0.440068	0.7371	0.0059	0.0224	N/A	AT2G33180.1	N/A
30244315	Pavir.J40566.1	4694	2	-0.440068	0.7371	0.0595	0.1457	N/A	AT2G41120.1	N/A
30281078	Pavir.Fb02029.1	920	22	-0.439285	0.7375	<.0001	<.0001	secondary metabolism.isoprenoids.carotenoids.carotenoid cleavage dioxygenase	AT3G63520.1	carotenoid cleavage dioxygenase 1
30230268	Pavir.Ea02709.1	5456	2	-0.439285	0.7375	0.0303	0.0863	mitochondrial electron transport / ATP synthesis.NADH-DH.localisation not clear	AT5G11770.1	NADH-ubiquinone oxidoreductase 20 kDa subunit, mitochondrial
30215237	Pavir.Ia01507.1	5225	1	-0.438894	0.7377	0.0285	0.0819	misc.cytochrome P450	AT1G64950.1	cytochrome P450, family 89, subfamily A, polypeptide 5
30230060	Pavir.Ea02399.1	2586	4	-0.438894	0.7377	0.0094	0.033	RNA.processing.splicing	AT5G06160.1	splicing factor-related
30280027	Pavir.Fb01410.1	515	10	-0.438698	0.7378	<.0001	<.0001	N/A	AT1G15980.1	NDH-dependent cyclic electron flow 1
30235072	Pavir.Ab02915.1	3707	4	-0.438112	0.7381	0.002	0.009	protein.targeting.secretory pathway.unspecified	AT5G37680.1	ADP-ribosylation factor-like A1A
30216897	Pavir.J01603.1	2107	1	-0.437526	0.7384	0.1005	0.2157	secondary metabolism.isoprenoids.carotenoids	AT1G57770.1	FAD/NAD(P)-binding oxidoreductase family protein
30311800	Pavir.Eb03248.1	536	4	-0.43733	0.7385	0.0064	0.024	N/A	AT5G39210.1	chlororespiratory reduction 7
30296941	Pavir.Bb02408.1	729	1	-0.43694	0.7387	0.1585	0.3036	stress.abiotic.heat	AT5G56030.1	heat shock protein 81-2
30230642	Pavir.Ea02715.1	1599	3	-0.436549	0.7389	0.0002	0.0012	N/A	AT3G24430.1	ATP binding
30281531	Pavir.J15451.1	4112	6	-0.436549	0.7389	0.0057	0.0218	RNA.regulation of transcription.unclassified	AT4G00850.1	GRF1-interacting factor 3
30284642	Pavir.J09661.1	2794	11	-0.436549	0.7389	<.0001	<.0001	N/A	N/A	N/A
30228881	Pavir.Ea02525.1	5222	1	-0.435963	0.7392	0.1673	0.3147	RNA.processing	AT5G55100.2	SWAP (Suppressor-of-White-APricot)/surp domain-containing protein
30223629	Pavir.Gb00410.1	3442	1	-0.435963	0.7392	0.1746	0.3239	secondary metabolism.flavonoids.anthocyanins.anthocyanidin reductase	AT1G61720.1	NAD(P)-binding Rossmann-fold superfamily protein
30221903	Pavir.Gb00377.1	2954	5	-0.435573	0.7394	0.0045	0.0179	tetrapyrrole synthesis.glu-tRNA synthetase	AT3G25660.1	Amidase family protein
30213073	Pavir.Ia00858.1	4270	3	-0.434988	0.7397	0.0105	0.036	cell.vesicle transport	AT1G62020.1	Coatomer, alpha subunit
30212840	Pavir.Ia03388.1	2611	6	-0.434793	0.7398	<.0001	<.0001	not assigned.no ontology	AT3G06130.1	Heavy metal transport/detoxification superfamily protein
30290190	Pavir.Ba00793.1	814	1	-0.434598	0.7399	0.117	0.2428	DNA.synthesis/chromatin structure.histone.core.H2A	AT1G51060.1	histone H2A 10
30267128	Pavir.J04689.1	4313	1	-0.434403	0.74	0.1741	0.3232	signalling.light.COP9 signalosome	AT5G43310.2	COP1-interacting protein-related
30273991	Pavir.J00664.1	5417	1	-0.433623	0.7404	0.045	0.1178	RNA.regulation of transcription.C2C2(Zn) GATA transcription factor family	AT3G21175.1	ZIM-like 1
30250852	Pavir.Aa03248.1	3188	7	-0.433234	0.7406	0.0002	0.0012	not assigned.no ontology	AT5G22140.1	FAD/NAD(P)-binding oxidoreductase family protein
30249629	Pavir.Aa00509.1	1628	3	-0.433234	0.7406	0.0039	0.0158	protein.synthesis.ribosomal protein.prokaryotic.chloroplast.50S subunit.L29	AT5G65220.1	Ribosomal L29 family protein
30308942	Pavir.Eb03274.1	1211	7	-0.432649	0.7409	0.0006	0.0032	not assigned.no ontology	AT5G65770.1	little nuclei4
30289069	Pavir.Ba01171.1	3467	5	-0.432649	0.7409	<.0001	<.0001	N/A	AT3G09140.2	Protein of unknown function (DUF674)
30311626	Pavir.Eb00571.1	5558	1	-0.432455	0.741	0.1035	0.2209	protein.synthesis.ribosome biogenesis	AT5G38290.2	Peptidyl-tRNA hydrolase family protein
30268593	Pavir.Cb01593.1	111	83	-0.432065	0.7412	<.0001	<.0001	PS.calvin cycle.rubisco small subunit	AT1G67090.1	ribulose bisphosphate carboxylase small chain 1A
30221385	Pavir.Gb00333.1	624	15	-0.431871	0.7413	<.0001	<.0001	protein.degradation.cysteine protease	AT5G43060.1	Granulin repeat cysteine protease family protein
30301014	Pavir.Bb03601.1	402	38	-0.431871	0.7413	<.0001	<.0001	misc.peroxidases	AT5G05340.1	Peroxidase superfamily protein
30289452	Pavir.Ba01256.1	1802	15	-0.431481	0.7415	<.0001	<.0001	N/A	AT4G24090.1	N/A
30307489	Pavir.J03033.1	5	370	-0.431287	0.7416	<.0001	<.0001	N/A	ATCG00480.1	ATP synthase subunit beta
30280227	Pavir.Fb00062.1	2043	5	-0.431287	0.7416	0.0055	0.0212	RNA.processing.splicing	AT5G42820.1	Zinc finger C-x8-C-x5-C-x3-H type family protein
30313824	Pavir.Eb02349.1	1648	5	-0.43012	0.7422	0.0006	0.0032	cell wall.precursor synthesis.UXS	AT3G62830.1	NAD(P)-binding Rossmann-fold superfamily protein
30275383	Pavir.J11337.1	2704	2	-0.429537	0.7425	0.0664	0.1586	N/A	AT5G53620.1	N/A
30215960	Pavir.Ia02497.1	2345	5	-0.429343	0.7426	0.0005	0.0027	protein.postranslational modification	AT4G33500.1	Protein phosphatase 2C family protein
30255872	Pavir.J22283.1	2722	5	-0.427789	0.7434	0.0003	0.0017	N/A	AT5G10730.1	NAD(P)-binding Rossmann-fold superfamily protein
30219386	Pavir.J01374.1	5480	1	-0.427401	0.7436	0.0026	0.0112	development.unspecified	AT1G75900.1	GDSL-like Lipase/Acylhydrolase superfamily protein
30205261	Pavir.Ca00990.1	4144	6	-0.427401	0.7436	<.0001	<.0001	not assigned.no ontology.hydroxyproline rich proteins	AT3G25690.1	Hydroxyproline-rich glycoprotein family protein
30244627	Pavir.J19278.1	4762	1	-0.427207	0.7437	0.0405	0.1085	transport.ABC transporters and multidrug resistance systems	AT1G79600.1	Protein kinase superfamily protein
30303606	Pavir.Ga01744.1	5382	2	-0.427207	0.7437	0.0825	0.1861	N/A	AT2G23390.1	N/A
30236826	Pavir.Ib00721.1	2688	12	-0.427013	0.7438	<.0001	<.0001	N/A	AT2G03420.1	N/A
30185151	Pavir.J00145.1	4623	2	-0.426238	0.7442	0.039	0.1054	redox.misc	AT5G17770.1	NADH:cytochrome B5 reductase 1
30257880	Pavir.J00184.1	5115	3	-0.426044	0.7443	0.0016	0.0074	not assigned.no ontology	AT5G05520.1	Outer membrane OMP85 family protein
30236280	Pavir.Ab00583.1	3783	2	-0.425656	0.7445	0.1054	0.2238	protein.synthesis.ribosomal protein.eukaryotic.60S subunit.L27A	AT1G70600.1	Ribosomal protein L18e/L15 superfamily protein
30268689	Pavir.Cb00900.1	5107	2	-0.425462	0.7446	0.0012	0.0058	development.unspecified	AT1G61040.1	plus-3 domain-containing protein
30239714	Pavir.Ib02630.1	3940	3	-0.425462	0.7446	0.0014	0.0066	not assigned.no ontology	AT3G29240.1	Protein of unknown function (DUF179)
30223941	Pavir.Gb00365.1	5190	1	-0.425075	0.7448	0.162	0.3083	not assigned.no ontology.C2 domain-containing protein	AT1G05500.1	Calcium-dependent lipid-binding (CaLB domain) family protein
30301725	Pavir.J20457.1	2950	2	-0.425075	0.7448	0.0536	0.1349	fermentation.LDH	AT4G17260.1	Lactate/malate dehydrogenase family protein
30245206	Pavir.J15521.1	1009	20	-0.424881	0.7449	<.0001	<.0001	N/A	N/A	N/A
30272576	Pavir.J02343.1	5556	1	-0.424494	0.7451	0.0528	0.1333	not assigned.no ontology.pentatricopeptide (PPR) repeat-containing protein	AT3G46790.1	Tetratricopeptide repeat (TPR)-like superfamily protein
30297204	Pavir.Bb01489.1	3332	5	-0.42372	0.7455	0.0004	0.0022	protein.degradation.cysteine protease	AT5G45890.1	senescence-associated gene 12
30237673	Pavir.Ib00144.1	1393	13	-0.423139	0.7458	<.0001	<.0001	misc.protease inhibitor/seed storage/lipid transfer protein (LTP) family protein	AT1G66850.1	Bifunctional inhibitor/lipid-transfer protein/seed storage 2S albumin superfamily protein
30295305	Pavir.J04566.1	722	14	-0.422559	0.7461	<.0001	<.0001	N/A	AT3G59780.1	Rhodanese/Cell cycle control phosphatase superfamily protein
30189876	Pavir.J03114.1	4947	1	-0.422366	0.7462	0.0707	0.1653	misc.gluco- galacto- and mannosidases.beta-galactosidase	AT1G72990.1	beta-galactosidase 17
30226535	Pavir.Ea01995.1	3150	9	-0.422172	0.7463	<.0001	<.0001	RNA.regulation of transcription.CCAAT box binding factor family HAP5	AT3G12480.1	nuclear factor Y, subunit C11
30207098	Pavir.Ca00628.1	1204	18	-0.422172	0.7463	<.0001	<.0001	protein.targeting.chloroplast	AT2G28900.1	outer plastid envelope protein 16-1
30296357	Pavir.J14843.1	5578	1	-0.421786	0.7465	0.1658	0.3132	signalling.receptor kinases.misc	AT1G03430.1	histidine-containing phosphotransfer factor 5
30290284	Pavir.Ba01363.1	4553	2	-0.421399	0.7467	0.0135	0.0443	not assigned.no ontology	AT2G17120.1	lysm domain GPI-anchored protein 2 precursor
30186398	Pavir.Fa00051.1	3903	4	-0.421013	0.7469	0.0003	0.0017	stress.abiotic.cold	AT5G23950.1	Calcium-dependent lipid-binding (CaLB domain) family protein
30304073	Pavir.Ga01186.1	1033	6	-0.42082	0.747	<.0001	<.0001	RNA.transcription	AT4G13670.1	plastid transcriptionally active 5
30192406	Pavir.Da02076.1	4924	2	-0.420241	0.7473	0.0988	0.2129	N/A	AT2G25170.1	chromatin remodeling factor CHD3 (PICKLE)
30197542	Pavir.J17943.1	5510	1	-0.420048	0.7474	0.1137	0.2372	signalling.receptor kinases.leucine rich repeat XI	AT1G09970.2	Leucine-rich receptor-like protein kinase family protein
30309394	Pavir.Eb00987.1	3736	6	-0.419276	0.7478	0.0022	0.0098	protein.targeting.nucleus	AT1G71480.1	Nuclear transport factor 2 (NTF2) family protein
30301670	Pavir.Bb02421.1	2807	8	-0.419083	0.7479	0.0005	0.0027	N/A	AT5G56210.1	WPP domain interacting protein 2
30246889	Pavir.J13853.1	1284	3	-0.418504	0.7482	0.0292	0.0838	stress.abiotic.heat	AT3G44110.1	DNAJ homologue 3
30250632	Pavir.Aa00825.1	5145	1	-0.417926	0.7485	0.0495	0.1263	N/A	N/A	N/A
30300364	Pavir.Bb00287.1	4582	2	-0.417926	0.7485	0.0909	0.1998	not assigned.no ontology	AT1G34770.1	N/A
30250184	Pavir.Aa02873.1	4851	1	-0.41754	0.7487	0.1782	0.3283	protein.postranslational modification	AT5G19680.1	Leucine-rich repeat (LRR) family protein
30260155	Pavir.Db01579.1	471	14	-0.41754	0.7487	<.0001	<.0001	PS.lightreaction.photosystem I.LHC-I	AT1G61520.1	photosystem I light harvesting complex gene 3
30223660	Pavir.Gb00126.1	4600	1	-0.416962	0.749	0.0951	0.2068	signalling.calcium	AT1G19870.1	IQ-domain 32
30203727	Pavir.Ca02844.1	1727	10	-0.416962	0.749	<.0001	<.0001	secondary metabolism.isoprenoids.tocopherol biosynthesis.MPBQ/MSBQ methyltransferase	AT3G63410.1	S-adenosyl-L-methionine-dependent methyltransferases superfamily protein
30287024	Pavir.J12118.1	4928	2	-0.416962	0.749	0.0009	0.0045	N/A	N/A	N/A
30200804	Pavir.J13834.1	1173	28	-0.416577	0.7492	<.0001	<.0001	misc.protease inhibitor/seed storage/lipid transfer protein (LTP) family protein	AT4G12520.1	Bifunctional inhibitor/lipid-transfer protein/seed storage 2S albumin superfamily protein
30187276	Pavir.Fa00799.1	4088	3	-0.416385	0.7493	0.0022	0.0098	transport.metabolite transporters at the envelope membrane	AT5G33320.1	Glucose-6-phosphate/phosphate translocator-related
30201136	Pavir.J11452.1	3095	2	-0.415807	0.7496	0.0023	0.0102	RNA.processing.RNA helicase	AT5G08610.1	P-loop containing nucleoside triphosphate hydrolases superfamily protein
30234829	Pavir.Ab00346.1	4406	3	-0.415615	0.7497	0.0503	0.1281	signalling.G-proteins	AT3G22942.1	G-protein gamma subunit 2
30209234	Pavir.Ia01856.1	2318	3	-0.414845	0.7501	0.0023	0.0102	signalling.G-proteins	AT3G54840.1	Ras-related small GTP-binding family protein
30214594	Pavir.Ia04239.1	3151	7	-0.414461	0.7503	<.0001	<.0001	N/A	AT5G04440.1	Protein of unknown function (DUF1997)
30249972	Pavir.Aa01461.1	1048	1	-0.414268	0.7504	0.0166	0.0523	TCA / org transformation.TCA.IDH	AT4G35260.1	isocitrate dehydrogenase 1
30222943	Pavir.Gb00458.1	287	2	-0.414076	0.7505	0.034	0.0944	PS.photorespiration.glycine cleavage.T subunit	AT1G11860.1	Glycine cleavage T-protein family
30313090	Pavir.Eb03120.1	4452	4	-0.414076	0.7505	0.0093	0.0327	stress.biotic	AT4G23630.1	VIRB2-interacting protein 1
30186366	Pavir.Fa00618.1	3205	3	-0.413692	0.7507	0.0026	0.0112	amino acid metabolism.synthesis.aromatic aa.chorismate.3-deoxy-D-arabino-heptulosonate 7-phosphate synthase	AT1G22410.1	Class-II DAHP synthetase family protein
30221488	Pavir.Gb00227.1	348	36	-0.413307	0.7509	<.0001	<.0001	transport.potassium	AT4G00630.1	K+ efflux antiporter 2
30236851	Pavir.Ib00030.1	3582	5	-0.413115	0.751	0.0005	0.0027	not assigned.no ontology	AT3G61080.1	Protein kinase superfamily protein
30270940	Pavir.J34526.1	4456	3	-0.412923	0.7511	0.0073	0.0267	secondary metabolism.phenylpropanoids.lignin biosynthesis.CAD	AT4G34230.1	cinnamyl alcohol dehydrogenase 5
30262310	Pavir.Db01434.1	3320	5	-0.412923	0.7511	0.0007	0.0036	N/A	ATCG00770.1	ribosomal protein S8
30312838	Pavir.Eb01154.1	4708	2	-0.412539	0.7513	0.0188	0.058	amino acid metabolism.synthesis.aromatic aa.phenylalanine and tyrosine	AT1G80360.1	Pyridoxal phosphate (PLP)-dependent transferases superfamily protein
30269210	Pavir.Cb00478.1	1019	40	-0.412155	0.7515	<.0001	<.0001	N/A	AT5G08050.1	Protein of unknown function (DUF1118)
30194757	Pavir.J00746.1	2138	10	-0.410812	0.7522	0.0005	0.0027	protein.degradation	AT5G35220.1	Peptidase M50 family protein
30269884	Pavir.Cb00828.1	2144	10	-0.409853	0.7527	<.0001	<.0001	protein.synthesis.ribosomal protein.eukaryotic.40S subunit.S9	AT5G39850.1	Ribosomal protein S4
30290864	Pavir.Ba01670.1	3388	4	-0.40947	0.7529	0.0047	0.0186	N/A	AT4G12590.1	Protein of unknown function DUF106, transmembrane
30289339	Pavir.Ba01113.1	2871	1	-0.409087	0.7531	0.1037	0.2212	N/A	AT1G06130.1	glyoxalase 2-4
30254842	Pavir.J02421.1	3850	3	-0.408321	0.7535	0.0061	0.023	RNA.regulation of transcription.General Transcription	AT5G09380.1	RNA polymerase III RPC4
30281719	Pavir.J25916.1	1377	13	-0.407938	0.7537	<.0001	<.0001	N/A	ATMG00070.1	NADH dehydrogenase subunit 9
30237212	Pavir.Ib00452.1	3092	7	-0.406981	0.7542	0.0001	0.0006	N/A	AT1G14345.1	NAD(P)-linked oxidoreductase superfamily protein
30208327	Pavir.J03777.1	2034	11	-0.406407	0.7545	<.0001	<.0001	major CHO metabolism.degradation.starch.starch phosphorylase	AT3G46970.1	alpha-glucan phosphorylase 2
30193625	Pavir.Da02270.1	4558	2	-0.406216	0.7546	0.1301	0.2642	RNA.regulation of transcription.General Transcription TBP-binding protein	AT5G45600.1	YEATS family protein
30290033	Pavir.Ba01834.1	3995	3	-0.40526	0.7551	0.0058	0.0221	protein.synthesis.ribosomal protein.eukaryotic.60S subunit.L34	AT5G39785.1	Protein of unknown function (DUF1666)
30293933	Pavir.Ba02442.1	30	1	-0.404305	0.7556	0.0535	0.1347	PS.lightreaction.photosystem I.PSI polypeptide subunits	AT2G20260.1	photosystem I subunit E-2
30192228	Pavir.Da00056.1	3720	2	-0.404305	0.7556	0.0589	0.1448	misc.gluco- galacto- and mannosidases.alpha-galactosidase	AT5G11720.1	Glycosyl hydrolases family 31 protein
30214070	Pavir.Ia03134.1	2965	4	-0.403924	0.7558	0.0007	0.0036	transport.metal	AT4G33520.1	P-type ATP-ase 1
30238801	Pavir.Ib00609.1	4643	2	-0.403351	0.7561	0.0235	0.07	protein.targeting.secretory pathway.unspecified	AT5G52280.1	Myosin heavy chain-related protein
30261255	Pavir.Db01293.1	5243	2	-0.402779	0.7564	0.006	0.0227	misc.short chain dehydrogenase/reductase (SDR)	AT4G09750.1	NAD(P)-binding Rossmann-fold superfamily protein
30292768	Pavir.Ba00317.1	3417	6	-0.401825	0.7569	0.0005	0.0027	N/A	AT5G13610.1	Protein of unknown function (DUF155)
30293398	Pavir.Ba01007.1	5598	1	-0.401444	0.7571	0.0372	0.1012	misc.nitrilases *nitrile lyases berberine bridge enzymes reticuline oxidases troponine reductases	AT4G34880.1	Amidase family protein
30211291	Pavir.Ia02372.1	2020	3	-0.401063	0.7573	0.0199	0.0607	misc.glutathione S transferases	AT3G03190.1	glutathione S-transferase F11
30270236	Pavir.Cb00208.1	5324	1	-0.400873	0.7574	0.1772	0.3273	amino acid metabolism.synthesis.aspartate family.lysine.diaminopimelate decarboxylase	AT3G14390.1	Pyridoxal-dependent decarboxylase family protein
30189656	Pavir.J35066.1	356	1	-0.400682	0.7575	0.1882	0.3416	PS.lightreaction.photosystem II.PSII polypeptide subunits	AT4G15510.1	Photosystem II reaction center PsbP family protein
30300862	Pavir.Bb01424.1	3763	7	-0.400682	0.7575	<.0001	<.0001	stress.abiotic.cold	AT5G23950.1	Calcium-dependent lipid-binding (CaLB domain) family protein
30215239	Pavir.Ia00423.1	350	6	-0.400682	0.7575	<.0001	<.0001	amino acid metabolism.synthesis.aspartate family.methionine.S-adenosylmethionine synthetase	AT1G02500.1	S-adenosylmethionine synthetase 1
30222711	Pavir.Gb01080.1	5264	1	-0.399921	0.7579	0.2576	0.4219	redox.thioredoxin	AT3G53220.1	Thioredoxin superfamily protein
30224455	Pavir.Gb00411.1	3838	2	-0.39973	0.758	0.0555	0.1386	secondary metabolism.flavonoids.anthocyanins.anthocyanidin reductase	AT1G61720.1	NAD(P)-binding Rossmann-fold superfamily protein
30265799	Pavir.Hb01943.1	1829	21	-0.398589	0.7586	<.0001	<.0001	metal handling	AT5G19140.1	Aluminium induced protein with YGL and LRDR motifs
30270556	Pavir.J04925.1	4576	3	-0.398589	0.7586	0.0001	0.0006	not assigned.no ontology.C2 domain-containing protein	AT1G07310.1	Calcium-dependent lipid-binding (CaLB domain) family protein
30247482	Pavir.J00623.1	4742	1	-0.397828	0.759	0.1941	0.3483	not assigned.no ontology	AT3G19080.1	SWIB complex BAF60b domain-containing protein
30253440	Pavir.Aa00714.1	5435	1	-0.397068	0.7594	0.0882	0.1958	signalling.MAP kinases	AT1G18160.1	Protein kinase superfamily protein
30200356	Pavir.J31760.1	2121	1	-0.397068	0.7594	0.2028	0.3589	N/A	N/A	N/A
30241432	Pavir.Ib04370.1	2867	1	-0.397068	0.7594	0.2634	0.4284	cell.organisation	AT3G26070.1	Plastid-lipid associated protein PAP / fibrillin family protein
30297649	Pavir.Bb01766.1	2869	5	-0.397068	0.7594	0.0098	0.0341	transport.metal	AT3G19490.1	sodium:hydrogen antiporter 1
30314426	Pavir.J36229.1	83	13	-0.396688	0.7596	0.0004	0.0022	PS.lightreaction.photosystem I.PSI polypeptide subunits	AT4G02770.1	photosystem I subunit D-1
30185266	Pavir.J29868.1	1439	15	-0.396498	0.7597	<.0001	<.0001	not assigned.no ontology	AT2G33255.1	Haloacid dehalogenase-like hydrolase (HAD) superfamily protein
30287763	Pavir.J34919.1	3166	3	-0.396498	0.7597	0.0121	0.0405	transport.peptides and oligopeptides	AT1G65730.1	YELLOW STRIPE like 7
30294904	Pavir.J11132.1	4871	1	-0.395739	0.7601	0.0269	0.0782	PS.lightreaction.photosystem II.PSII polypeptide subunits	AT5G11450.1	Mog1/PsbP/DUF1795-like photosystem II reaction center PsbP family protein
30227677	Pavir.Ea00580.1	3064	8	-0.395739	0.7601	0.0029	0.0123	not assigned.no ontology	AT3G55605.1	Mitochondrial glycoprotein family protein
30232044	Pavir.Ab00121.1	4991	2	-0.395739	0.7601	0.0284	0.0817	not assigned.no ontology.pentatricopeptide (PPR) repeat-containing protein	AT1G56570.1	Tetratricopeptide repeat (TPR)-like superfamily protein
30283757	Pavir.J13632.1	1717	5	-0.39517	0.7604	<.0001	<.0001	signalling.receptor kinases.leucine rich repeat III	AT2G26730.1	Leucine-rich repeat protein kinase family protein
30236274	Pavir.Ab00009.1	4715	4	-0.39479	0.7606	0.0001	0.0006	N/A	AT1G33230.1	TMPIT-like protein
30259609	Pavir.J03679.1	1188	16	-0.3946	0.7607	<.0001	<.0001	N/A	N/A	N/A
30290790	Pavir.Ba00936.1	2240	11	-0.394411	0.7608	<.0001	<.0001	misc.oxidases - copper flavone etc	AT2G35660.1	FAD/NAD(P)-binding oxidoreductase family protein
30211482	Pavir.Ia02331.1	5076	3	-0.393842	0.7611	0.0091	0.0322	signalling.phosphinositides.inositol-1 3 4-trisphosphate 5/6-kinase	AT5G16760.1	Inositol 1,3,4-trisphosphate 5/6-kinase family protein
30238078	Pavir.Ib03542.1	2646	5	-0.393653	0.7612	0.0034	0.0141	protein.degradation.ubiquitin.E3.RING	AT3G19950.1	RING/U-box superfamily protein
30289273	Pavir.Ba00684.1	4711	2	-0.393653	0.7612	0.0567	0.1411	protein.postranslational modification	AT2G19130.1	S-locus lectin protein kinase family protein
30272618	Pavir.J37127.1	1126	9	-0.393463	0.7613	<.0001	<.0001	N/A	AT5G55220.1	trigger factor type chaperone family protein
30271621	Pavir.J30562.1	3518	6	-0.393463	0.7613	0.0026	0.0112	protein.synthesis.ribosomal protein.unknown.unknown	AT3G56010.1	N/A
30193912	Pavir.Da00296.1	2631	7	-0.392895	0.7616	<.0001	<.0001	secondary metabolism.phenylpropanoids.lignin biosynthesis.4CL	AT1G51680.1	4-coumarate:CoA ligase 1
30218083	Pavir.J09198.1	5168	2	-0.392895	0.7616	0.3073	0.475	major CHO metabolism.synthesis.starch.AGPase	AT1G27680.1	ADPGLC-PPase large subunit
30238932	Pavir.Ib00653.1	2458	5	-0.392705	0.7617	0.0012	0.0058	stress.abiotic.light	AT1G75100.1	J-domain protein required for chloroplast accumulation response 1
30228230	Pavir.Ea04002.1	2244	1	-0.39138	0.7624	0.4029	0.5702	amino acid metabolism.degradation.glutamate family.arginine	AT5G14800.1	pyrroline-5- carboxylate (P5C) reductase
30194391	Pavir.Da01626.1	1234	8	-0.391191	0.7625	<.0001	<.0001	N/A	AT5G55220.1	trigger factor type chaperone family protein
30223326	Pavir.Gb01346.1	5001	1	-0.390623	0.7628	0.2914	0.4585	not assigned.no ontology	AT5G14440.1	Surfeit locus protein 2 (SURF2)
30290534	Pavir.Ba02322.1	4829	3	-0.390434	0.7629	0.0011	0.0054	misc.misc2	AT5G20960.1	aldehyde oxidase 1
30214027	Pavir.Ia00495.1	4551	2	-0.390434	0.7629	0.0748	0.1721	misc.oxidases - copper flavone etc	AT1G56000.1	FAD/NAD(P)-binding oxidoreductase family protein
30232985	Pavir.Ab03278.1	725	7	-0.390245	0.763	0.0016	0.0074	protein.degradation.serine protease	AT4G17740.1	Peptidase S41 family protein
30298198	Pavir.Bb02017.1	3976	2	-0.390056	0.7631	0.0699	0.1642	N/A	AT2G25800.1	Protein of unknown function (DUF810)
30306109	Pavir.J00994.1	2793	2	-0.389867	0.7632	0.0346	0.0956	not assigned.no ontology	AT5G62740.1	SPFH/Band 7/PHB domain-containing membrane-associated protein family
30226989	Pavir.Ea03150.1	553	51	-0.389867	0.7632	<.0001	<.0001	N/A	AT5G44650.1	N/A
30192008	Pavir.Da02394.1	5347	1	-0.389489	0.7634	0.1762	0.3259	not assigned.no ontology	AT4G24340.1	Phosphorylase superfamily protein
30296098	Pavir.J36988.1	449	1	-0.388922	0.7637	0.3598	0.5275	N/A	AT5G43750.1	NAD(P)H dehydrogenase 18
30218665	Pavir.J35846.1	5504	1	-0.388544	0.7639	0.1651	0.3123	N/A	AT4G01995.1	N/A
30235930	Pavir.Ab00143.1	4268	8	-0.387978	0.7642	<.0001	<.0001	N/A	AT5G17670.1	alpha/beta-Hydrolases superfamily protein
30260474	Pavir.Db00190.1	2606	10	-0.387978	0.7642	<.0001	<.0001	N/A	AT5G24460.1	N/A
30187521	Pavir.Fa01731.1	5304	1	-0.3876	0.7644	0.1485	0.2899	signalling.receptor kinases.DUF 26	AT4G23200.1	cysteine-rich RLK (RECEPTOR-like protein kinase) 12
30228548	Pavir.Ea02302.1	2667	3	-0.387412	0.7645	0.0274	0.0794	RNA.processing.RNA helicase	AT5G08610.1	P-loop containing nucleoside triphosphate hydrolases superfamily protein
30272567	Pavir.J04806.1	1555	28	-0.386657	0.7649	<.0001	<.0001	secondary metabolism.phenylpropanoids.lignin biosynthesis.CCoAOMT	AT4G34050.1	S-adenosyl-L-methionine-dependent methyltransferases superfamily protein
30260669	Pavir.Db00170.1	3862	2	-0.386657	0.7649	0.0616	0.1497	N/A	N/A	N/A
30224405	Pavir.Gb01798.1	784	12	-0.386468	0.765	<.0001	<.0001	signalling.calcium	AT5G61790.1	calnexin 1
30225449	Pavir.J02207.1	3	29	-0.38596	0.76527	<.0001	<.0001	gluconeogenesis / glyoxylate cycle.pyruvate dikinase	AT4G15530.1	pyruvate orthophosphate dikinase
30185247	Pavir.J22707.1	4392	5	-0.385714	0.7654	<.0001	<.0001	N/A	N/A	N/A
30239958	Pavir.Ib01499.1	4626	2	-0.385149	0.7657	0.0213	0.0643	N/A	AT2G27090.1	Protein of unknown function (DUF630 and DUF632)
30265960	Pavir.Hb01335.1	2561	8	-0.384395	0.7661	<.0001	<.0001	redox.thioredoxin	AT1G19730.1	Thioredoxin superfamily protein
30235048	Pavir.Ab00225.1	5475	1	-0.384207	0.7662	0.2913	0.4585	N/A	AT3G61870.1	N/A
30313249	Pavir.Eb04014.1	5517	1	-0.384207	0.7662	0.3252	0.4939	transport.metabolite transporters at the mitochondrial membrane	AT5G42130.1	Mitochondrial substrate carrier family protein
30203824	Pavir.Ca02868.1	4931	2	-0.384207	0.7662	0.1513	0.2943	stress.abiotic.heat	AT2G27140.1	HSP20-like chaperones superfamily protein
30231451	Pavir.Ea02500.1	1795	8	-0.384019	0.7663	<.0001	<.0001	N/A	AT1G66840.1	Plant protein of unknown function (DUF827)
30203516	Pavir.Ca02468.1	2518	12	-0.383642	0.7665	<.0001	<.0001	RNA.processing.splicing	AT3G55460.1	SC35-like splicing factor 30
30234325	Pavir.Ab00822.1	2815	10	-0.383266	0.7667	<.0001	<.0001	stress.abiotic.unspecified	AT2G26040.1	PYR1-like 2
30241651	Pavir.Ib03228.1	1899	12	-0.383078	0.7668	<.0001	<.0001	RNA.regulation of transcription.unclassified	AT5G10770.1	Eukaryotic aspartyl protease family protein
30240987	Pavir.Ib02480.1	2058	9	-0.381573	0.7676	<.0001	<.0001	misc.glutathione S transferases	AT1G10370.1	Glutathione S-transferase family protein
30231290	Pavir.Ea03820.1	4166	3	-0.381198	0.7678	0.0089	0.0316	N/A	AT3G48710.1	DEK domain-containing chromatin associated protein
30263016	Pavir.Db00827.1	3849	3	-0.381198	0.7678	0.0007	0.0036	N/A	AT1G76460.1	RNA-binding (RRM/RBD/RNP motifs) family protein
30188777	Pavir.Fa00923.1	4597	2	-0.38101	0.7679	0.2224	0.3831	signalling.calcium	AT3G18430.1	Calcium-binding EF-hand family protein
30307217	Pavir.J36784.1	2543	2	-0.38101	0.7679	0.0011	0.0054	N-metabolism.ammonia metabolism.glutamine synthetase	AT5G37600.1	glutamine synthase clone R1
30263058	Pavir.Db02232.1	1576	1	-0.380634	0.7681	0.0673	0.1601	N/A	AT5G27560.1	Domain of unknown function (DUF1995)
30302637	Pavir.Ga00875.1	1011	13	-0.380634	0.7681	<.0001	<.0001	misc.short chain dehydrogenase/reductase (SDR)	AT3G61220.2	NAD(P)-binding Rossmann-fold superfamily protein
30262370	Pavir.Db00283.1	2889	3	-0.380634	0.7681	0.003	0.0126	N/A	AT4G25910.1	NFU domain protein 3
30187552	Pavir.Fa00666.1	3414	4	-0.380258	0.7683	0.0076	0.0276	N/A	AT3G48690.1	alpha/beta-Hydrolases superfamily protein
30273961	Pavir.J00824.1	3466	2	-0.380258	0.7683	0.0044	0.0176	cell.organisation	AT1G50010.1	tubulin alpha-2 chain
30250654	Pavir.Aa00784.1	1471	10	-0.379695	0.7686	<.0001	<.0001	mitochondrial electron transport / ATP synthesis.alternative oxidase	AT3G22370.1	alternative oxidase 1A
30238057	Pavir.Ib02369.1	5114	3	-0.379507	0.7687	0.0099	0.0343	cell.organisation	AT1G42550.1	plastid movement impaired1
30290625	Pavir.Ba00827.1	5138	2	-0.37932	0.7688	0.0321	0.0902	N/A	AT1G11700.1	Protein of unknown function, DUF584
30238285	Pavir.Ib03921.1	3224	7	-0.37932	0.7688	<.0001	<.0001	protein.degradation.subtilases	AT5G67360.1	Subtilase family protein
30211046	Pavir.Ia01674.1	4425	1	-0.378944	0.769	0.1094	0.2302	protein.aa activation.tyrosine-tRNA ligase	AT3G02660.1	Tyrosyl-tRNA synthetase, class Ib, bacterial/mitochondrial
30192067	Pavir.Da00437.1	4574	3	-0.378944	0.769	0.0003	0.0017	protein.degradation	AT2G24280.1	alpha/beta-Hydrolases superfamily protein
30275783	Pavir.J12739.1	984	8	-0.378944	0.769	<.0001	<.0001	protein.degradation.metalloprotease	AT3G47060.1	FTSH protease 7
30283199	Pavir.J04080.1	707	6	-0.378944	0.769	0.0004	0.0022	protein.synthesis.ribosomal protein.eukaryotic.40S subunit.S4	AT5G58420.1	Ribosomal protein S4 (RPS4A) family protein
30239847	Pavir.Ib04408.1	4471	4	-0.378382	0.7693	0.0001	0.0006	nucleotide metabolism.synthesis.purine.adenylosuccinate synthase	AT3G57610.1	adenylosuccinate synthase
30194500	Pavir.Da01072.1	5007	2	-0.377819	0.7696	0.0612	0.149	not assigned.no ontology	AT5G42570.1	B-cell receptor-associated 31-like
30311882	Pavir.Eb01146.1	4810	2	-0.377819	0.7696	0.011	0.0374	signalling.calcium	AT5G56360.1	calmodulin-binding protein
30295705	Pavir.J36245.1	5442	1	-0.37707	0.77	0.2823	0.4496	redox.thioredoxin	AT1G19730.1	Thioredoxin superfamily protein
30298543	Pavir.Bb03059.1	2843	3	-0.37707	0.77	0.0009	0.0045	nucleotide metabolism.degradation	AT4G05090.1	Inositol monophosphatase family protein
30278284	Pavir.Fb02381.1	3052	5	-0.37632	0.7704	0.0002	0.0012	RNA.regulation of transcription.C2H2 zinc finger family	AT2G02070.1	indeterminate(ID)-domain 5
30232613	Pavir.Ab01524.1	4972	1	-0.376133	0.7705	0.092	0.2017	metal handling.binding chelation and storage	AT5G63530.1	farnesylated protein 3
30252900	Pavir.Aa01968.1	2633	9	-0.376133	0.7705	<.0001	<.0001	stress.abiotic.unspecified	AT3G10080.1	RmlC-like cupins superfamily protein
30206281	Pavir.Ca01064.1	4187	2	-0.375572	0.7708	0.1238	0.2535	stress.biotic	AT2G36800.1	don-glucosyltransferase 1
30200506	Pavir.J25820.1	4272	3	-0.375384	0.7709	0.0192	0.059	not assigned.no ontology	AT4G24930.1	thylakoid lumenal 17.9 kDa protein, chloroplast
30223398	Pavir.Gb02423.1	1164	3	-0.374823	0.7712	0.0024	0.0105	N/A	AT2G32910.1	DCD (Development and Cell Death) domain protein
30241120	Pavir.Ib03416.1	4134	5	-0.374823	0.7712	0.0828	0.1866	misc.oxidases - copper flavone etc	AT3G03080.1	Zinc-binding dehydrogenase family protein
30208996	Pavir.Ia00859.1	5232	1	-0.374262	0.7715	0.2365	0.3997	protein.postranslational modification	AT3G17850.1	Protein kinase superfamily protein
30196155	Pavir.J28560.1	2299	1	-0.374262	0.7715	0.4039	0.5711	N/A	N/A	N/A
30232297	Pavir.Ab00683.1	1715	5	-0.374262	0.7715	0.011	0.0374	TCA / org transformation.TCA.CS	AT2G44350.1	Citrate synthase family protein
30241776	Pavir.Ib00851.1	698	5	-0.373701	0.7718	0.0007	0.0036	amino acid metabolism.degradation.branched chain group.shared	AT2G33150.1	peroxisomal 3-ketoacyl-CoA thiolase 3
30227011	Pavir.Ea01726.1	1213	3	-0.373514	0.7719	0.5457	0.698	N/A	AT1G51510.1	RNA-binding (RRM/RBD/RNP motifs) family protein
30228744	Pavir.Ea01074.1	3675	5	-0.37314	0.7721	<.0001	<.0001	RNA.regulation of transcription.bZIP transcription factor family	AT5G06950.1	bZIP transcription factor family protein
30247219	Pavir.J29503.1	458	11	-0.37314	0.7721	0.001	0.0049	lipid metabolism.'exotics'(steroids. squalene etc)	AT4G36750.1	Quinone reductase family protein
30236791	Pavir.Ib02285.1	4561	2	-0.372954	0.7722	0.1391	0.2768	glycolysis.plastid branch.pyruvate kinase (PK)	AT1G32440.1	plastidial pyruvate kinase 3
30306867	Pavir.J39609.1	5300	2	-0.3715	0.772978	0.0068	0.0252	N/A	AT5G48540.1	receptor-like protein kinase-related family protein
30210393	Pavir.Ia02380.1	3702	4	-0.371273	0.7731	0.0036	0.0148	N/A	AT3G10405.1	N/A
30225752	Pavir.J37157.1	1455	5	-0.371086	0.7732	0.0008	0.0041	not assigned.no ontology	AT4G32190.1	Myosin heavy chain-related protein
30192823	Pavir.Da00156.1	5622	1	-0.370713	0.7734	0.1494	0.2911	RNA.transcription	AT3G59600.1	RNA polymerase Rpb8
30194851	Pavir.J03814.1	4697	2	-0.37034	0.7736	0.1083	0.2288	major CHO metabolism.degradation.starch.D enzyme	AT5G01260.2	Carbohydrate-binding-like fold
30301077	Pavir.Bb02394.1	3189	8	-0.37034	0.7736	<.0001	<.0001	N/A	AT1G60000.1	RNA-binding (RRM/RBD/RNP motifs) family protein
30310171	Pavir.Eb01809.1	1995	15	-0.369967	0.7738	<.0001	<.0001	transport.unspecified cations	AT2G26900.1	Sodium Bile acid symporter family
30282385	Pavir.J34423.1	2947	3	-0.369408	0.7741	0.0559	0.1394	glycolysis.cytosolic branch.phospho-enol-pyruvate carboxylase (PEPC)	AT1G53310.1	phosphoenolpyruvate carboxylase 1
30293452	Pavir.Ba03900.1	4457	3	-0.369408	0.7741	0.0051	0.0199	not assigned.no ontology	AT2G30880.1	Pleckstrin homology (PH) domain-containing protein
30275287	Pavir.J38193.1	3184	4	-0.368849	0.7744	0.0052	0.0202	signalling.receptor kinases.DUF 26	AT4G23210.2	cysteine-rich RLK (RECEPTOR-like protein kinase) 13
30264152	Pavir.Hb00702.1	3280	5	-0.36829	0.7747	0.001	0.0049	development.storage proteins	AT1G33270.1	Acyl transferase/acyl hydrolase/lysophospholipase superfamily protein
30198368	Pavir.J40434.1	3461	4	-0.368104	0.7748	0.0005	0.0027	DNA.repair	AT1G01490.1	Heavy metal transport/detoxification superfamily protein
30223630	Pavir.Gb01855.1	247	1	-0.367732	0.775	0.4239	0.5901	protein.synthesis.ribosomal protein.eukaryotic.60S subunit.L12	AT3G53430.1	Ribosomal protein L11 family protein
30275428	Pavir.J21901.1	3465	5	-0.367732	0.775	0.002	0.009	N/A	AT1G08640.1	Chloroplast J-like domain 1
30229739	Pavir.Ea00481.1	4052	3	-0.367732	0.775	0.0748	0.1721	protein.aa activation.aspartate-tRNA ligase	AT4G33760.1	tRNA synthetase class II (D, K and N) family protein
30193862	Pavir.Da00382.1	269	13	-0.367546	0.7751	<.0001	<.0001	N/A	AT5G45680.1	FK506-binding protein 13
30188181	Pavir.Fa01352.1	5147	2	-0.36736	0.7752	0.0938	0.2048	N/A	AT4G30240.1	Syntaxin/t-SNARE family protein
30268788	Pavir.Cb01723.1	2183	4	-0.366615	0.7756	0.0032	0.0133	N/A	AT5G53160.2	regulatory components of ABA receptor 3
30201059	Pavir.J08224.1	5331	1	-0.366429	0.7757	0.1634	0.3101	N/A	AT1G44920.1	N/A
30302546	Pavir.Ga00895.1	422	14	-0.365128	0.7764	<.0001	<.0001	protein.synthesis.elongation	AT1G62750.1	Translation elongation factor EFG/EF2 protein
30206437	Pavir.Ca00693.1	2703	2	-0.364942	0.7765	0.0084	0.03	RNA.processing.splicing	AT2G37340.1	arginine/serine-rich zinc knuckle-containing protein 33
30252746	Pavir.Aa03395.1	2944	6	-0.364942	0.7765	<.0001	<.0001	N/A	AT4G19830.1	FKBP-like peptidyl-prolyl cis-trans isomerase family protein
30240548	Pavir.Ib00244.1	4329	4	-0.364756	0.7766	0.014	0.0455	protein.postranslational modification	AT3G58500.1	protein phosphatase 2A-4
30268078	Pavir.Cb01642.1	4310	2	-0.364385	0.7768	0.0042	0.0169	development.unspecified	AT2G48120.1	pale cress protein (PAC)
30304153	Pavir.Ga01421.1	4794	1	-0.364013	0.777	0.2229	0.3837	N/A	AT5G08170.1	porphyromonas-type peptidyl-arginine deiminase family protein
30190587	Pavir.J02537.1	3844	5	-0.363642	0.7772	0.0018	0.0082	N/A	AT5G55660.1	DEK domain-containing chromatin associated protein
30313313	Pavir.Eb02881.1	5130	1	-0.363457	0.7773	0.0754	0.1734	amino acid metabolism.degradation.aspartate family.methionine	AT1G66520.1	formyltransferase, putative
30310162	Pavir.Eb01999.1	3130	2	-0.363457	0.7773	0.1555	0.2995	PS.lightreaction.photosystem II.LHC-II	AT2G34430.1	light-harvesting chlorophyll-protein complex II subunit B1
30199719	Pavir.J18856.1	5048	1	-0.363085	0.7775	0.1163	0.2416	not assigned.no ontology	AT1G28280.1	VQ motif-containing protein
30219220	Pavir.J10396.1	2648	7	-0.362529	0.7778	<.0001	<.0001	not assigned.no ontology	AT1G52510.1	alpha/beta-Hydrolases superfamily protein
30303683	Pavir.Ga00767.1	571	3	-0.362529	0.7778	0.0209	0.0632	N/A	AT2G35410.1	RNA-binding (RRM/RBD/RNP motifs) family protein
30208254	Pavir.J03103.1	4721	1	-0.362343	0.7779	0.1365	0.273	development.unspecified	AT3G09090.1	defective in exine formation protein (DEX1)
30189508	Pavir.J12821.1	2705	1	-0.362343	0.7779	0.1493	0.291	not assigned.no ontology	AT5G23890.1	N/A
30253196	Pavir.Aa02228.1	594	19	-0.362343	0.7779	<.0001	<.0001	signalling.phosphinositides	AT4G20260.1	plasma-membrane associated cation-binding protein 1
30230808	Pavir.Ea03930.1	3378	8	-0.361973	0.7781	<.0001	<.0001	not assigned.no ontology	AT4G12830.1	alpha/beta-Hydrolases superfamily protein
30313872	Pavir.Eb03441.1	3989	3	-0.361416	0.7784	<.0001	<.0001	misc.plastocyanin-like	AT3G20570.1	early nodulin-like protein 9
30289630	Pavir.Ba02622.1	429	55	-0.361416	0.7784	<.0001	<.0001	minor CHO metabolism.others	AT2G27680.1	NAD(P)-linked oxidoreductase superfamily protein
30209078	Pavir.Ia00943.1	5111	2	-0.361416	0.7784	0.1794	0.3295	N/A	AT4G33640.1	N/A
30250441	Pavir.Aa00117.1	3222	5	-0.36012	0.7791	0.0184	0.057	not assigned.no ontology	AT5G38890.1	Nucleic acid-binding, OB-fold-like protein
30205577	Pavir.Ca01250.1	4804	2	-0.359564	0.7794	0.0201	0.0612	N/A	AT1G48300.1	N/A
30199049	Pavir.J15849.1	4	27	-0.35925	0.77957	<.0001	<.0001	gluconeogenesis / glyoxylate cycle.pyruvate dikinase	AT4G15530.5	pyruvate orthophosphate dikinase
30283128	Pavir.J02777.1	1293	23	-0.358084	0.7802	<.0001	<.0001	misc.GCN5-related N-acetyltransferase	AT1G32070.3	nuclear shuttle interacting
30185609	Pavir.Fa00392.1	3983	4	-0.357714	0.7804	0.001	0.0049	stress.biotic	AT3G25070.1	RPM1 interacting protein 4
30227065	Pavir.Ea02001.1	4586	2	-0.357345	0.7806	0.0168	0.0529	not assigned.no ontology	AT5G19290.1	alpha/beta-Hydrolases superfamily protein
30316733	Pavir.Ha00163.1	3626	7	-0.356606	0.781	0.0003	0.0017	misc.nitrilases *nitrile lyases berberine bridge enzymes reticuline oxidases troponine reductases	AT2G29360.1	NAD(P)-binding Rossmann-fold superfamily protein
30193466	Pavir.Da00527.1	4453	1	-0.356421	0.7811	0.0116	0.039	N/A	AT1G76460.1	RNA-binding (RRM/RBD/RNP motifs) family protein
30228836	Pavir.Ea03569.1	1069	11	-0.356236	0.7812	<.0001	<.0001	N/A	AT3G59780.1	Rhodanese/Cell cycle control phosphatase superfamily protein
30233125	Pavir.Ab02941.1	3346	4	-0.356236	0.7812	0.0055	0.0212	protein.degradation	AT1G73990.1	signal peptide peptidase
30273250	Pavir.J04106.1	2547	6	-0.355867	0.7814	0.048	0.1234	N/A	N/A	N/A
30251344	Pavir.Aa00918.1	4496	3	-0.355498	0.7816	0.0113	0.0383	cell wall.precursor synthesis.UER	AT1G63000.1	nucleotide-rhamnose synthase/epimerase-reductase
30242849	Pavir.Ib03998.1	3132	6	-0.354944	0.7819	0.0005	0.0027	N/A	AT1G47720.1	Primosome PriB/single-strand DNA-binding
30249232	Pavir.Aa01714.1	5497	1	-0.354575	0.7821	0.1513	0.2943	RNA.regulation of transcription.MYB domain transcription factor family	AT1G58220.1	Homeodomain-like superfamily protein
30287731	Pavir.J02799.1	5559	1	-0.354391	0.7822	0.4142	0.5798	protein.degradation.aspartate protease	AT1G03220.1	Eukaryotic aspartyl protease family protein
30220667	Pavir.J29542.1	4669	3	-0.353837	0.7825	0.0128	0.0424	N/A	ATCG00800.1	structural constituent of ribosome
30306042	Pavir.Ga01820.1	5041	2	-0.353837	0.7825	0.1903	0.344	protein.degradation.subtilases	AT3G14240.1	Subtilase family protein
30211477	Pavir.Ia02868.1	3615	3	-0.353653	0.7826	0.0047	0.0186	transport.sugars	AT4G35300.1	tonoplast monosaccharide transporter2
30298896	Pavir.Bb02390.1	5495	1	-0.353284	0.7828	0.1266	0.2581	misc.oxidases - copper flavone etc	AT2G32300.1	uclacyanin 1
30250131	Pavir.Aa02225.1	7	366	-0.353284	0.7828	<.0001	<.0001	N/A	ATCG00480.1	ATP synthase subunit beta
30318445	Pavir.Ha01293.1	4057	3	-0.352732	0.7831	0.0391	0.1055	minor CHO metabolism.others	AT5G53850.2	haloacid dehalogenase-like hydrolase family protein
30268366	Pavir.Cb01535.1	4302	2	-0.352732	0.7831	0.0334	0.093	N/A	AT5G24690.1	Protein of unknown function (DUF3411)
30204691	Pavir.Ca01121.1	2375	5	-0.352547	0.7832	0.0148	0.0473	misc.peroxidases	AT5G66390.1	Peroxidase superfamily protein
30186676	Pavir.Fa00380.1	5291	1	-0.352179	0.7834	0.0345	0.0954	nucleotide metabolism.salvage.phosphoribosyltransferases.upp	AT3G27190.1	uridine kinase-like 2
30298593	Pavir.Bb00888.1	5466	1	-0.352179	0.7834	0.3442	0.5131	development.unspecified	AT3G48140.1	B12D protein
30224237	Pavir.Gb00017.1	5407	1	-0.351443	0.7838	0.2802	0.4473	N/A	AT4G33480.1	N/A
30304198	Pavir.Ga01327.1	3459	8	-0.350522	0.7843	<.0001	<.0001	cell wall.cell wall proteins.LRR	AT4G06744.1	Leucine-rich repeat (LRR) family protein
30194182	Pavir.Da00431.1	396	20	-0.350522	0.7843	<.0001	<.0001	PS.lightreaction.photosystem I.LHC-I	AT1G61520.1	photosystem I light harvesting complex gene 3
30224682	Pavir.Gb02224.1	17	283	-0.350155	0.7845	<.0001	<.0001	N/A	ATCG00480.1	ATP synthase subunit beta
30206347	Pavir.Ca00901.1	3436	3	-0.349419	0.7849	0.0685	0.162	N/A	AT4G28910.1	novel interactor of JAZ
30204416	Pavir.Ca00191.1	3357	10	-0.349052	0.7851	<.0001	<.0001	stress.biotic.PR-proteins	AT1G65870.1	Disease resistance-responsive (dirigent-like protein) family protein
30231069	Pavir.Ea02805.1	971	32	-0.348868	0.7852	<.0001	<.0001	DNA.synthesis/chromatin structure	AT2G03390.1	uvrB/uvrC motif-containing protein
30268214	Pavir.Cb00474.1	4172	4	-0.348868	0.7852	0.0057	0.0218	N/A	AT5G61040.1	N/A
30261825	Pavir.Db00008.1	2352	1	-0.3485	0.7854	0.0436	0.1149	stress.abiotic.heat	AT4G24190.1	Chaperone protein htpG family protein
30245980	Pavir.J02619.1	5036	1	-0.348317	0.7855	0.1451	0.285	protein.degradation.metalloprotease	AT4G37040.1	methionine aminopeptidase 1D
30299956	Pavir.Bb03604.1	444	51	-0.348317	0.7855	<.0001	<.0001	misc.peroxidases	AT5G05340.1	Peroxidase superfamily protein
30224391	Pavir.Gb00738.1	845	24	-0.34795	0.7857	<.0001	<.0001	RNA.regulation of transcription.putative transcription regulator	AT3G61260.1	Remorin family protein
30191388	Pavir.Da00123.1	4992	1	-0.347582	0.7859	0.0685	0.162	transport.metal	AT4G37270.1	heavy metal atpase 1
30292946	Pavir.Ba00663.1	3735	1	-0.347399	0.786	0.1134	0.2368	cell.vesicle transport	AT4G21450.1	PapD-like superfamily protein
30258573	Pavir.J38070.1	2734	3	-0.346848	0.7863	0.2433	0.407	RNA.processing	AT1G03330.1	Small nuclear ribonucleoprotein family protein
30208193	Pavir.J11716.1	1362	5	-0.346481	0.7865	<.0001	<.0001	not assigned.no ontology	AT2G33550.1	Homeodomain-like superfamily protein
30234270	Pavir.Ab00454.1	3726	1	-0.345564	0.787	0.1532	0.2968	amino acid metabolism.degradation.serine-glycine-cysteine group.cysteine	AT1G79230.1	mercaptopyruvate sulfurtransferase 1
30234808	Pavir.Ab00518.1	4186	5	-0.345015	0.7873	<.0001	<.0001	not assigned.no ontology	AT3G10730.1	SAD1/UNC-84 domain protein 2
30209583	Pavir.Ia03536.1	3270	6	-0.344648	0.7875	0.0002	0.0012	amino acid metabolism.synthesis.glutamate family.arginine.argininosuccinate lyase	AT5G10920.1	L-Aspartase-like family protein
30251724	Pavir.Aa00053.1	4059	4	-0.344465	0.7876	0.0474	0.1225	RNA.processing.splicing	AT4G21660.1	proline-rich spliceosome-associated (PSP) family protein
30303465	Pavir.Ga00342.1	1568	18	-0.344099	0.7878	<.0001	<.0001	cell wall.degradation.mannan-xylose-arabinose-fucose	AT5G64570.1	beta-D-xylosidase 4
30291223	Pavir.Ba02029.1	2491	6	-0.343732	0.788	0.0039	0.0158	hormone metabolism.abscisic acid.signal transduction	AT3G19290.1	ABRE binding factor 4
30204805	Pavir.Ca00468.1	4656	1	-0.343549	0.7881	0.1716	0.3198	not assigned.no ontology	AT5G11560.1	catalytics
30251199	Pavir.Aa00880.1	2626	3	-0.343366	0.7882	0.0169	0.0531	secondary metabolism.isoprenoids.non-mevalonate pathway.geranylgeranyl pyrophosphate synthase	AT4G38460.1	geranylgeranyl reductase
30276072	Pavir.J18755.1	1050	8	-0.343183	0.7883	0.0012	0.0058	signalling.G-proteins	AT1G52380.1	NUP50 (Nucleoporin 50 kDa) protein
30299150	Pavir.Bb03374.1	3324	3	-0.342817	0.7885	0.126	0.2572	RNA.processing.splicing	AT5G64200.1	ortholog of human splicing factor SC35
30300760	Pavir.Bb01741.1	4431	1	-0.342634	0.7886	0.1367	0.2733	cell.organisation	AT1G04780.1	Ankyrin repeat family protein
30241218	Pavir.Ib01100.1	4332	2	-0.342451	0.7887	0.002	0.009	lipid metabolism.lipid degradation.lysophospholipases.phospholipase A2	AT2G06925.1	Phospholipase A2 family protein
30249592	Pavir.Aa01791.1	5276	1	-0.342269	0.7888	0.0147	0.0471	N/A	N/A	N/A
30241056	Pavir.Ib01878.1	5481	1	-0.342086	0.7889	0.2523	0.4168	development.unspecified	AT4G37650.1	GRAS family transcription factor
30312427	Pavir.Eb02165.1	1732	15	-0.342086	0.7889	<.0001	<.0001	RNA.regulation of transcription.MYB-related transcription factor family	AT5G53200.1	Homeodomain-like superfamily protein
30223987	Pavir.Gb01474.1	2695	3	-0.34172	0.7891	0.0182	0.0566	N/A	AT3G12640.1	RNA binding (RRM/RBD/RNP motifs) family protein
30252620	Pavir.Aa01016.1	3350	4	-0.341172	0.7894	0.0109	0.0372	N/A	AT2G35585.1	N/A
30269257	Pavir.Cb01781.1	31	2	-0.340806	0.7896	0.3528	0.5202	stress.abiotic.heat	AT4G24280.1	chloroplast heat shock protein 70-1
30223986	Pavir.Gb00881.1	4577	1	-0.340258	0.7899	0.155	0.2991	RNA.regulation of transcription.Nucleosome/chromatin assembly factor group	AT1G20696.1	high mobility group B3
30242908	Pavir.Ib03545.1	2280	6	-0.339893	0.7901	<.0001	<.0001	cell.organisation	AT3G19960.1	myosin 1
30314932	Pavir.J01925.1	3671	6	-0.339528	0.7903	0.0001	0.0006	N/A	AT1G65590.1	beta-hexosaminidase 3
30190986	Pavir.J40166.1	4593	3	-0.338615	0.7908	0.0361	0.099	misc.oxidases - copper flavone etc	AT5G06580.1	FAD-linked oxidases family protein
30205564	Pavir.Ca00889.1	3363	4	-0.338433	0.7909	0.008	0.0287	N/A	AT4G20300.2	Protein of unknown function (DUF1639)
30220131	Pavir.J01005.1	2302	10	-0.338433	0.7909	0.0001	0.0006	cell.vesicle transport	AT5G58060.1	SNARE-like superfamily protein
30226145	Pavir.Ea02989.1	4408	2	-0.338068	0.7911	0.1522	0.2956	protein.synthesis.ribosome biogenesis.Pre-rRNA processing and modifications.snoRNPs	AT2G20490.2	nucleolar RNA-binding Nop10p family protein
30223541	Pavir.Gb01842.1	2814	7	-0.338068	0.7911	0.002	0.009	signalling.MAP kinases	AT1G49740.1	PLC-like phosphodiesterases superfamily protein
30305412	Pavir.Ga00741.1	3598	6	-0.337886	0.7912	0.0059	0.0224	not assigned.no ontology	AT2G04940.1	scramblase-related
30227460	Pavir.Ea03777.1	5437	1	-0.337703	0.7913	0.0724	0.1682	signalling.lipids	AT5G05710.1	Pleckstrin homology (PH) domain superfamily protein
30190206	Pavir.J20811.1	260	24	-0.337703	0.7913	0.0125	0.0416	redox.peroxiredoxin	AT3G52960.1	Thioredoxin superfamily protein
30189142	Pavir.J38927.1	4454	1	-0.336974	0.7917	0.5239	0.68	N/A	AT3G03890.1	FMN binding
30292573	Pavir.Ba00545.1	4811	1	-0.336428	0.792	0.2234	0.3841	secondary metabolism.isoprenoids.tocopherol biosynthesis	AT3G11945.1	homogentisate prenyltransferase
30206858	Pavir.Ca00621.1	4001	5	-0.336246	0.7921	0.0005	0.0027	RNA.processing	AT2G47640.2	Small nuclear ribonucleoprotein family protein
30230626	Pavir.Ea01831.1	2030	6	-0.335517	0.7925	0.0074	0.027	nucleotide metabolism.synthesis.purine.GAR Synthetase	AT1G09830.1	Glycinamide ribonucleotide (GAR) synthetase
30195005	Pavir.J04287.1	541	2	-0.335335	0.7926	0.0639	0.1539	protein.targeting.chloroplast	AT5G03940.1	chloroplast signal recognition particle 54 kDa subunit
30269631	Pavir.Cb00609.1	1363	6	-0.33388	0.7934	0.0052	0.0202	cell.vesicle transport	AT4G12780.1	Chaperone DnaJ-domain superfamily protein
30251625	Pavir.Aa03577.1	1412	2	-0.333516	0.7936	0.0579	0.1428	fermentation.LDH	AT4G17260.1	Lactate/malate dehydrogenase family protein
30214537	Pavir.Ia03270.1	4262	2	-0.333334	0.7937	0.0848	0.1901	N/A	AT5G15270.1	RNA-binding KH domain-containing protein
30216932	Pavir.J01620.1	4853	2	-0.333153	0.7938	0.008	0.0287	N/A	AT2G48070.1	resistance to phytophthora 1
30260942	Pavir.Db02130.1	2751	8	-0.332789	0.794	0.0001	0.0006	N/A	AT3G02645.1	Plant protein of unknown function (DUF247)
30206785	Pavir.Ca01862.1	4930	1	-0.332244	0.7943	0.2405	0.4039	RNA.processing.ribonucleases	AT3G60500.1	3\'-5\'-exoribonuclease family protein
30310464	Pavir.Eb03662.1	2	86	-0.332244	0.7943	<.0001	<.0001	PS.lightreaction.photosystem II.PSII polypeptide subunits	AT3G50820.1	photosystem II subunit O-2
30210096	Pavir.Ia04860.1	2273	3	-0.332062	0.7944	0.008	0.0287	misc.glutathione S transferases	AT2G47730.1	glutathione S-transferase phi 8
30195944	Pavir.J03245.1	4622	3	-0.332062	0.7944	0.0006	0.0032	misc.acid and other phosphatases	AT1G13750.1	Purple acid phosphatases superfamily protein
30288481	Pavir.Ba00549.1	5322	1	-0.331881	0.7945	0.3758	0.5438	PS.lightreaction.photosystem I.LHC-I	AT3G61470.1	photosystem I light harvesting complex gene 2
30299009	Pavir.Bb03178.1	689	38	-0.331881	0.7945	<.0001	<.0001	N/A	AT3G03890.1	FMN binding
30200405	Pavir.J20263.1	4137	2	-0.331518	0.7947	0.5808	0.7294	redox.ascorbate and glutathione	AT1G06620.1	2-oxoglutarate (2OG) and Fe(II)-dependent oxygenase superfamily protein
30213320	Pavir.Ia00715.1	1644	4	-0.331518	0.7947	<.0001	<.0001	N/A	AT5G65840.1	Thioredoxin superfamily protein
30254978	Pavir.J23402.1	1128	13	-0.331336	0.7948	<.0001	<.0001	cell.organisation	AT2G35490.1	Plastid-lipid associated protein PAP / fibrillin family protein
30255376	Pavir.J22721.1	4305	4	-0.331155	0.7949	0.0011	0.0054	redox.thioredoxin	AT5G51010.1	Rubredoxin-like superfamily protein
30306064	Pavir.Ga00880.1	912	18	-0.330973	0.795	<.0001	<.0001	RNA.regulation of transcription.putative transcription regulator	AT3G61260.1	Remorin family protein
30304614	Pavir.Ga00191.1	2201	12	-0.330792	0.7951	<.0001	<.0001	N/A	AT5G38660.1	acclimation of photosynthesis to environment
30233070	Pavir.Ab00398.1	5525	1	-0.33061	0.7952	0.1431	0.2819	protein.degradation.ubiquitin.E3.RING	AT5G24870.1	RING/U-box superfamily protein
30298389	Pavir.Bb01722.1	355	14	-0.33061	0.7952	<.0001	<.0001	N/A	AT4G24770.1	31-kDa RNA binding protein
30292273	Pavir.Ba00243.1	726	2	-0.330429	0.7953	0.1659	0.3132	C1-metabolism	AT5G16450.1	Ribonuclease E inhibitor RraA/Dimethylmenaquinone methyltransferase
30230226	Pavir.Ea04149.1	1685	15	-0.330248	0.7954	<.0001	<.0001	protein.targeting.chloroplast	AT3G20320.1	trigalactosyldiacylglycerol2
30194889	Pavir.J17782.1	5167	1	-0.330066	0.7955	0.5112	0.6684	misc.glutathione S transferases	AT3G62760.1	Glutathione S-transferase family protein
30239525	Pavir.Ib01141.1	767	35	-0.330066	0.7955	<.0001	<.0001	PS.calvin cycle.FBPase	AT3G54050.1	high cyclic electron flow 1
30307550	Pavir.J24884.1	4803	2	-0.329885	0.7956	0.0683	0.1617	N/A	N/A	N/A
30229300	Pavir.Ea00711.1	3584	4	-0.328978	0.7961	0.0293	0.0839	protein.aa activation.alanine-tRNA ligase	AT3G16565.2	alanine-tRNA ligases;nucleic acid binding;ligases, forming aminoacyl-tRNA and related compounds;nucleotide binding;ATP binding
30298158	Pavir.Bb00255.1	1045	15	-0.328435	0.7964	<.0001	<.0001	minor CHO metabolism.others	AT1G06690.1	NAD(P)-linked oxidoreductase superfamily protein
30313276	Pavir.Eb01104.1	2141	10	-0.328435	0.7964	<.0001	<.0001	not assigned.no ontology	AT5G04990.1	SAD1/UNC-84 domain protein 1
30284504	Pavir.J30516.1	4291	2	-0.328254	0.7965	0.3418	0.5106	misc.misc2	AT3G23570.1	alpha/beta-Hydrolases superfamily protein
30293747	Pavir.Ba03858.1	154	4	-0.328073	0.7966	0.0081	0.029	RNA.regulation of transcription.unclassified	AT3G52150.1	RNA-binding (RRM/RBD/RNP motifs) family protein
30267915	Pavir.Cb01952.1	468	24	-0.327892	0.7967	<.0001	<.0001	N/A	N/A	N/A
30224722	Pavir.Gb00303.1	4090	4	-0.32771	0.7968	0.0108	0.0369	protein.degradation.cysteine protease	AT1G47128.1	Granulin repeat cysteine protease family protein
30250569	Pavir.Aa02113.1	4616	2	-0.327348	0.797	0.0615	0.1495	protein.synthesis.elongation	AT5G13650.2	elongation factor family protein
30233444	Pavir.Ab02811.1	2042	3	-0.327167	0.7971	0.0042	0.0169	mitochondrial electron transport / ATP synthesis.alternative oxidase	AT3G22370.1	alternative oxidase 1A
30243708	Pavir.J00377.1	4469	3	-0.327167	0.7971	0.0204	0.062	RNA.regulation of transcription.bHLH Basic Helix-Loop-Helix family	AT2G42280.1	basic helix-loop-helix (bHLH) DNA-binding superfamily protein
30311870	Pavir.Eb02102.1	639	33	-0.326986	0.7972	<.0001	<.0001	RNA.regulation of transcription.SNF7	AT4G29160.1	SNF7 family protein
30279466	Pavir.Fb01688.1	2661	8	-0.326624	0.7974	<.0001	<.0001	N/A	AT2G30170.1	Protein phosphatase 2C family protein
30237034	Pavir.Ib01608.1	4162	6	-0.326082	0.7977	<.0001	<.0001	RNA.processing.splicing	AT1G09140.1	SERINE-ARGININE PROTEIN 30
30196674	Pavir.J36881.1	5560	1	-0.325901	0.7978	0.1237	0.2534	hormone metabolism.abscisic acid.synthesis-degradation	AT1G04580.1	aldehyde oxidase 4
30315740	Pavir.J02399.1	4828	1	-0.325901	0.7978	0.3838	0.5516	N/A	AT4G32900.2	Peptidyl-tRNA hydrolase II (PTH2) family protein
30294807	Pavir.J04653.1	2444	11	-0.324816	0.7984	<.0001	<.0001	N/A	AT5G05480.1	Peptide-N4-(N-acetyl-beta-glucosaminyl)asparagine amidase A protein
30202376	Pavir.J24083.1	4213	5	-0.324455	0.7986	0.0016	0.0074	secondary metabolism.phenylpropanoids.lignin biosynthesis.CAD	AT4G37990.1	elicitor-activated gene 3-2
30239049	Pavir.Ib01819.1	2858	8	-0.323372	0.7992	0.0333	0.0928	not assigned.no ontology.glycine rich proteins	AT4G02450.1	HSP20-like chaperones superfamily protein
30213499	Pavir.Ia01232.1	5339	1	-0.323191	0.7993	0.422	0.5883	not assigned.no ontology	AT5G28750.1	Bacterial sec-independent translocation protein mttA/Hcf106
30201448	Pavir.J24907.1	4858	1	-0.322469	0.7997	0.0377	0.1025	not assigned.no ontology	AT5G21090.1	Leucine-rich repeat (LRR) family protein
30291253	Pavir.Ba00842.1	23	112	-0.322469	0.7997	<.0001	<.0001	PS.lightreaction.ATP synthase.gamma chain	AT4G04640.1	ATPase, F1 complex, gamma subunit protein
30226541	Pavir.Ea03561.1	2896	8	-0.322289	0.7998	0.0002	0.0012	protein.synthesis.ribosomal protein.eukaryotic.60S subunit.L5	AT5G39740.1	ribosomal protein L5 B
30308479	Pavir.J09362.1	5530	1	-0.322108	0.7999	0.1934	0.3476	N/A	AT5G48540.1	receptor-like protein kinase-related family protein
30282489	Pavir.J00298.1	1608	14	-0.322108	0.7999	<.0001	<.0001	N/A	AT5G59750.1	DHBP synthase RibB-like alpha/beta domain;GTP cyclohydrolase II
30215889	Pavir.Ia02501.1	5439	1	-0.321928	0.8	0.3332	0.503	N/A	AT1G23360.1	S-adenosyl-L-methionine-dependent methyltransferases superfamily protein
30302557	Pavir.Ga02465.1	4750	1	-0.321748	0.8001	0.3973	0.5649	N/A	AT5G15320.1	N/A
30227472	Pavir.Ea04034.1	2391	11	-0.321567	0.8002	<.0001	<.0001	N/A	AT1G31010.1	organellar single-stranded DNA binding protein 4
30238143	Pavir.Ib01020.1	4806	2	-0.321387	0.8003	0.0012	0.0058	lipid metabolism.FA synthesis and FA elongation.acyl-CoA binding protein	AT5G53470.1	acyl-CoA binding protein 1
30285728	Pavir.J30437.1	1664	9	-0.321387	0.8003	0.0001	0.0006	stress.abiotic.heat	AT4G24190.2	Chaperone protein htpG family protein
30302438	Pavir.Ga00345.1	2841	7	-0.321027	0.8005	<.0001	<.0001	N/A	AT2G21960.1	N/A
30271168	Pavir.J18270.1	2408	8	-0.320846	0.8006	<.0001	<.0001	fermentation.aldehyde dehydrogenase	AT1G44170.3	aldehyde dehydrogenase 3H1
30212799	Pavir.Ia00386.1	3967	3	-0.320846	0.8006	0.0206	0.0625	N/A	AT3G29185.1	Domain of unknown function (DUF3598)
30258588	Pavir.J01395.1	5479	1	-0.320486	0.8008	0.1922	0.346	N/A	AT3G57990.1	N/A
30256328	Pavir.J32345.1	3296	4	-0.320486	0.8008	0.0265	0.0772	PS.lightreaction.photosystem I.LHC-I	AT1G19150.1	photosystem I light harvesting complex gene 6
30249949	Pavir.Aa00215.1	1073	28	-0.320486	0.8008	<.0001	<.0001	protein.synthesis.initiation	AT2G24060.1	Translation initiation factor 3 protein
30299172	Pavir.Bb01323.1	1690	2	-0.320306	0.8009	0.002	0.009	development.unspecified	AT4G16280.4	RNA binding;abscisic acid binding
30226279	Pavir.Ea00621.1	3081	7	-0.320126	0.801	0.0008	0.0041	not assigned.no ontology	AT1G16430.1	Surfeit locus protein 5 subunit 22 of Mediator complex
30218843	Pavir.J35213.1	4376	3	-0.319946	0.8011	0.0648	0.1556	cell.organisation	AT5G10470.2	kinesin like protein for actin based chloroplast movement 1
30196105	Pavir.J34840.1	2572	7	-0.319766	0.8012	0.0042	0.0169	N/A	AT5G64130.1	cAMP-regulated phosphoprotein 19-related protein
30264904	Pavir.Hb01947.1	923	25	-0.319406	0.8014	<.0001	<.0001	not assigned.no ontology	AT3G48420.1	Haloacid dehalogenase-like hydrolase (HAD) superfamily protein
30186379	Pavir.Fa01938.1	1659	3	-0.319046	0.8016	0.0034	0.0141	redox.ascorbate and glutathione.ascorbate.GME	AT5G28840.1	GDP-D-mannose 3\',5\'-epimerase
30204342	Pavir.Ca02356.1	1051	3	-0.318866	0.8017	0.0101	0.0349	DNA.synthesis/chromatin structure.histone.core.H2A	AT1G08880.1	Histone superfamily protein
30226719	Pavir.Ea02417.1	4689	2	-0.318866	0.8017	0.1263	0.2577	protein.degradation	AT5G46390.1	Peptidase S41 family protein
30207716	Pavir.J33035.1	1532	2	-0.318686	0.8018	0.3095	0.4774	not assigned.no ontology	AT3G12050.1	Aha1 domain-containing protein
30205789	Pavir.Ca00483.1	4855	2	-0.318686	0.8018	0.03	0.0856	protein.degradation.ubiquitin.E2	AT5G41700.1	ubiquitin conjugating enzyme 8
30228842	Pavir.Ea00538.1	4459	2	-0.318326	0.802	0.0964	0.2091	protein.synthesis.ribosomal protein.eukaryotic.60S subunit.L26	AT3G49910.1	Translation protein SH3-like family protein
30224333	Pavir.Gb01712.1	3731	3	-0.318146	0.8021	0.0383	0.1039	not assigned.no ontology	AT2G35450.1	catalytics;hydrolases
30240625	Pavir.Ib00768.1	4879	2	-0.317966	0.8022	0.0395	0.1064	misc.gluco- galacto- and mannosidases.alpha-galactosidase	AT5G63840.1	Glycosyl hydrolases family 31 protein
30195685	Pavir.J01466.1	48	12	-0.316708	0.8029	0.0001	0.0006	mitochondrial electron transport / ATP synthesis.F1-ATPase	AT5G08690.1	ATP synthase alpha/beta family protein
30229975	Pavir.Ea03252.1	2559	9	-0.315092	0.8038	<.0001	<.0001	signalling.receptor kinases.leucine rich repeat III	AT5G58300.1	Leucine-rich repeat protein kinase family protein
30200344	Pavir.J17962.1	2111	12	-0.315092	0.8038	<.0001	<.0001	misc.peroxidases	AT2G39040.1	Peroxidase superfamily protein
30291361	Pavir.Ba02554.1	2901	5	-0.314912	0.8039	0.0346	0.0956	RNA.regulation of transcription.G2-like transcription factor family GARP	AT4G28610.1	phosphate starvation response 1
30265931	Pavir.Hb00223.1	420	42	-0.314912	0.8039	<.0001	<.0001	N/A	N/A	N/A
30233671	Pavir.Ab01295.1	1093	3	-0.314374	0.8042	0.0059	0.0224	not assigned.no ontology	AT2G33550.1	Homeodomain-like superfamily protein
30305821	Pavir.Ga01516.1	3704	2	-0.313656	0.8046	0.0909	0.1998	stress.biotic	AT3G54420.1	homolog of carrot EP3-3 chitinase
30223650	Pavir.Gb00511.1	4797	1	-0.313477	0.8047	0.2093	0.3665	signalling.receptor kinases.leucine rich repeat VIII.VIII-2	AT1G56130.1	Leucine-rich repeat transmembrane protein kinase
30317620	Pavir.Ha00863.1	5489	1	-0.312939	0.805	0.0812	0.184	stress.abiotic	AT3G01420.1	Peroxidase superfamily protein
30274757	Pavir.J00283.1	4264	3	-0.312939	0.805	0.003	0.0126	RNA.regulation of transcription.bHLH Basic Helix-Loop-Helix family	AT4G02590.1	basic helix-loop-helix (bHLH) DNA-binding superfamily protein
30230324	Pavir.Ea03825.1	2809	7	-0.312939	0.805	<.0001	<.0001	not assigned.no ontology.C2 domain-containing protein	AT3G16510.1	Calcium-dependent lipid-binding (CaLB domain) family protein
30197560	Pavir.J07933.1	475	14	-0.312939	0.805	<.0001	<.0001	misc.glutathione S transferases	AT3G03190.1	glutathione S-transferase F11
30318020	Pavir.Ha01274.1	2096	11	-0.312223	0.8054	<.0001	<.0001	stress.abiotic.heat	AT4G09350.1	Chaperone DnaJ-domain superfamily protein
30288389	Pavir.Ba01565.1	4317	2	-0.312044	0.8055	0.0972	0.2103	signalling.calcium	AT2G44310.1	Calcium-binding EF-hand family protein
30297818	Pavir.Bb02402.1	527	10	-0.311864	0.8056	0.0006	0.0032	misc.peroxidases	AT2G22420.1	Peroxidase superfamily protein
30317193	Pavir.Ha00327.1	549	36	-0.311864	0.8056	<.0001	<.0001	mitochondrial electron transport / ATP synthesis.uncoupling protein	AT3G54110.1	plant uncoupling mitochondrial protein 1
30188511	Pavir.Fa00205.1	1047	27	-0.311327	0.8059	<.0001	<.0001	not assigned.no ontology	AT4G35250.1	NAD(P)-binding Rossmann-fold superfamily protein
30287166	Pavir.J26278.1	3964	2	-0.311148	0.806	0.1196	0.2468	protein.degradation.cysteine protease	AT1G47128.1	Granulin repeat cysteine protease family protein
30211258	Pavir.Ia04798.1	1691	10	-0.310969	0.8061	0.0246	0.0726	misc.protease inhibitor/seed storage/lipid transfer protein (LTP) family protein	AT1G66850.1	Bifunctional inhibitor/lipid-transfer protein/seed storage 2S albumin superfamily protein
30268190	Pavir.Cb00397.1	4722	3	-0.310969	0.8061	0.0198	0.0604	RNA.regulation of transcription.unclassified	AT1G56460.1	HIT zinc finger ;PAPA-1-like conserved region
30317201	Pavir.Ha01690.1	1803	12	-0.31079	0.8062	0.0003	0.0017	N/A	N/A	N/A
30204781	Pavir.Ca01179.1	4041	3	-0.310611	0.8063	0.1334	0.2686	hormone metabolism.ethylene.synthesis-degradation.1-aminocyclopropane-1-carboxylate oxidase	AT1G77330.1	2-oxoglutarate (2OG) and Fe(II)-dependent oxygenase superfamily protein
30209033	Pavir.Ia02573.1	2488	1	-0.310432	0.8064	0.1751	0.3244	misc.gluco- galacto- and mannosidases.alpha-mannosidase	AT5G66150.1	Glycosyl hydrolase family 38 protein
30312032	Pavir.Eb00683.1	3670	6	-0.310432	0.8064	0.0247	0.0728	C1-metabolism.formate-tetrahydrofolate ligase	AT1G50480.1	10-formyltetrahydrofolate synthetase
30247418	Pavir.J34160.1	2347	12	-0.310432	0.8064	<.0001	<.0001	protein.degradation.metalloprotease	AT5G53170.1	FTSH protease 11
30233199	Pavir.Ab02966.1	393	12	-0.310432	0.8064	<.0001	<.0001	TCA / org transformation.TCA.pyruvate DH.E1	AT1G59900.1	pyruvate dehydrogenase complex E1 alpha subunit
30308737	Pavir.Eb00698.1	4815	2	-0.310432	0.8064	0.0877	0.1951	not assigned.no ontology	AT3G18260.1	Reticulon family protein
30266732	Pavir.Hb01734.1	271	15	-0.309538	0.8069	<.0001	<.0001	PS.calvin cycle.aldolase	AT2G21330.1	fructose-bisphosphate aldolase 1
30229226	Pavir.Ea00392.1	5612	1	-0.308823	0.8073	0.535	0.6884	lipid metabolism.lipid degradation.lysophospholipases.phospholipase D	AT3G15730.1	phospholipase D alpha 1
30290259	Pavir.Ba01135.1	3199	7	-0.308823	0.8073	0.0155	0.0492	misc.UDP glucosyl and glucoronyl transferases	AT3G16520.3	UDP-glucosyl transferase 88A1
30281742	Pavir.J30377.1	2327	1	-0.308287	0.8076	0.1967	0.3511	nucleotide metabolism.synthesis.pyrimidine.carbamoyl phosphate synthetase	AT3G27740.1	carbamoyl phosphate synthetase A
30289433	Pavir.Ba02366.1	4800	3	-0.307751	0.8079	0.0026	0.0112	signalling.calcium	AT3G61050.1	Calcium-dependent lipid-binding (CaLB domain) family protein
30308395	Pavir.J04954.1	968	6	-0.307751	0.8079	0.0037	0.0152	transport.potassium	AT1G01790.1	K+ efflux antiporter 1
30253163	Pavir.Aa02744.1	3807	3	-0.307573	0.808	0.1114	0.2335	misc.GDSL-motif lipase	AT5G45910.1	GDSL-like Lipase/Acylhydrolase superfamily protein
30281753	Pavir.J04623.1	78	30	-0.307394	0.8081	<.0001	<.0001	PS.lightreaction.photosystem I.PSI polypeptide subunits	AT1G31330.1	photosystem I subunit F
30252005	Pavir.Aa01280.1	991	9	-0.306859	0.8084	0.002	0.009	protein.synthesis.ribosomal protein.eukaryotic.60S subunit.L14	AT2G20450.1	Ribosomal protein L14
30315800	Pavir.J03846.1	1848	1	-0.30668	0.8085	0.0929	0.2034	DNA.synthesis/chromatin structure	AT1G77180.1	chromatin protein family
30187451	Pavir.Fa01339.1	519	13	-0.30668	0.8085	<.0001	<.0001	N/A	AT1G15980.1	NDH-dependent cyclic electron flow 1
30211493	Pavir.Ia02272.1	5278	1	-0.306502	0.8086	0.3109	0.4789	protein.synthesis.initiation	AT5G27640.1	translation initiation factor 3B1
30211243	Pavir.Ia04283.1	3048	3	-0.306502	0.8086	0.0148	0.0473	redox.ascorbate and glutathione.glutathione	AT3G54660.1	glutathione reductase
30235233	Pavir.Ab01308.1	1610	1	-0.306323	0.8087	0.2144	0.3728	RNA.regulation of transcription.Zn-finger(CCHC)	AT5G07350.1	TUDOR-SN protein 1
30208547	Pavir.J07416.1	2629	6	-0.305967	0.8089	0.0028	0.0119	N/A	AT5G62440.1	Protein of unknown function (DUF3223)
30212103	Pavir.Ia00841.1	4404	2	-0.305788	0.809	0.0045	0.0179	protein.targeting.chloroplast	AT3G17970.1	translocon at the outer membrane of chloroplasts 64-III
30261597	Pavir.Db01853.1	1906	7	-0.305432	0.8092	0.0084	0.03	not assigned.no ontology	AT2G34460.1	NAD(P)-binding Rossmann-fold superfamily protein
30240546	Pavir.Ib00078.1	560	18	-0.304897	0.8095	0.0002	0.0012	protein.synthesis.ribosomal protein.prokaryotic.chloroplast.50S subunit.L5	AT4G01310.1	Ribosomal L5P family protein
30292850	Pavir.Ba01894.1	5608	1	-0.304719	0.8096	0.0368	0.1005	N/A	N/A	N/A
30309905	Pavir.Eb00036.1	2647	2	-0.304719	0.8096	0.4462	0.6121	N/A	AT5G42070.1	N/A
30238118	Pavir.Ib02295.1	1281	7	-0.304541	0.8097	<.0001	<.0001	N/A	AT5G46790.1	PYR1-like 1
30239236	Pavir.Ib00039.1	5521	1	-0.304362	0.8098	0.2901	0.4575	cell.cycle	AT3G48750.1	cell division control 2
30253031	Pavir.Aa00685.1	4598	3	-0.304184	0.8099	0.0287	0.0824	RNA.regulation of transcription.SET-domain transcriptional regulator family	AT3G07670.1	Rubisco methyltransferase family protein
30299145	Pavir.Bb01945.1	5411	1	-0.304006	0.81	0.2226	0.3833	protein.postranslational modification	AT5G08160.1	serine/threonine protein kinase 3
30276516	Pavir.J07393.1	4095	4	-0.303828	0.8101	0.1058	0.2246	not assigned.no ontology	AT4G24930.1	thylakoid lumenal 17.9 kDa protein, chloroplast
30252492	Pavir.Aa01639.1	2917	2	-0.303294	0.8104	0.0324	0.0908	protein.degradation.serine protease	AT1G33360.1	ATP-dependent Clp protease
30206046	Pavir.Ca02217.1	5292	1	-0.302582	0.8108	0.1595	0.3047	N/A	AT3G19340.1	Protein of unknown function (DUF3754)
30200119	Pavir.J19574.1	5514	1	-0.302226	0.811	0.1625	0.309	RNA.regulation of transcription.putative transcription regulator	AT3G08020.1	PHD finger family protein
30208576	Pavir.J08432.1	4280	2	-0.302226	0.811	0.1672	0.3147	protein.postranslational modification	AT3G17850.1	Protein kinase superfamily protein
30298546	Pavir.Bb02529.1	4736	4	-0.301693	0.8113	<.0001	<.0001	N/A	AT4G35240.1	Protein of unknown function (DUF630 and DUF632)
30223921	Pavir.Gb01729.1	97	3	-0.301515	0.8114	0.0084	0.03	protein.degradation.serine protease	AT5G50920.1	CLPC homologue 1
30271334	Pavir.J02106.1	4200	5	-0.301515	0.8114	0.0284	0.0817	N/A	AT5G02580.1	Plant protein 1589 of unknown function
30296809	Pavir.Bb01576.1	1948	13	-0.301515	0.8114	<.0001	<.0001	N/A	AT2G04410.1	RPM1-interacting protein 4 (RIN4) family protein
30187079	Pavir.Fa00502.1	4690	2	-0.301159	0.8116	0.1937	0.3481	protein.postranslational modification	AT3G20830.1	AGC (cAMP-dependent, cGMP-dependent and protein kinase C) kinase family protein
30279215	Pavir.Fb01387.1	1345	5	-0.301159	0.8116	0.0618	0.1501	hormone metabolism.ethylene.induced-regulated-responsive-activated	AT2G42680.1	multiprotein bridging factor 1A
30254531	Pavir.J38007.1	4850	1	-0.300626	0.8119	0.3176	0.486	N/A	AT1G05205.1	N/A
30312155	Pavir.Eb01214.1	1300	5	-0.300626	0.8119	0.0045	0.0179	stress.abiotic.cold	AT1G05260.1	Peroxidase superfamily protein
30231523	Pavir.Ea02465.1	2211	18	-0.300448	0.812	<.0001	<.0001	PS.photorespiration.glycerate kinase	AT1G80380.2	P-loop containing nucleoside triphosphate hydrolases superfamily protein
30227156	Pavir.Ea03207.1	5250	1	-0.300271	0.8121	0.3445	0.5131	N/A	AT5G17910.1	N/A
30270353	Pavir.Cb01537.1	446	34	-0.300093	0.8122	<.0001	<.0001	PS.photorespiration.aminotransferases peroxisomal	AT2G13360.1	alanine:glyoxylate aminotransferase
30284525	Pavir.J23563.1	1536	7	-0.300093	0.8122	0.0133	0.0437	N/A	AT4G37200.1	Thioredoxin superfamily protein
30205593	Pavir.Ca01273.1	1282	9	-0.299915	0.8123	0.0003	0.0017	misc.oxidases - copper flavone etc	AT4G12280.1	copper amine oxidase family protein
30197317	Pavir.J00078.1	4640	2	-0.299738	0.8124	0.3344	0.5042	protein.degradation.cysteine protease	AT3G12490.2	cystatin B
30236891	Pavir.Ib02257.1	5486	1	-0.29956	0.8125	0.2457	0.4095	N/A	AT3G60340.1	alpha/beta-Hydrolases superfamily protein
30223473	Pavir.Gb00637.1	3533	1	-0.299383	0.8126	0.1101	0.2315	stress.biotic.PR-proteins	AT5G42510.1	Disease resistance-responsive (dirigent-like protein) family protein
30291116	Pavir.Ba01236.1	914	9	-0.299383	0.8126	<.0001	<.0001	DNA.synthesis/chromatin structure.histone.core.H2A	AT5G02560.1	histone H2A 12
30311562	Pavir.Eb01523.1	3856	2	-0.299028	0.8128	0.1331	0.2683	RNA.processing.RNA helicase	AT3G06480.1	DEAD box RNA helicase family protein
30277841	Pavir.J06280.1	3356	2	-0.299028	0.8128	0.1798	0.33	protein.postranslational modification	AT1G31160.1	HISTIDINE TRIAD NUCLEOTIDE-BINDING 2
30305657	Pavir.Ga01797.1	4843	2	-0.298673	0.813	0.1309	0.2654	misc.glutathione S transferases	AT1G77290.1	Glutathione S-transferase family protein
30303791	Pavir.Ga00286.1	1514	13	-0.29814	0.8133	0.0002	0.0012	amino acid metabolism.synthesis.serine-glycine-cysteine group.serine.phosphoglycerate dehydrogenase	AT3G19480.1	D-3-phosphoglycerate dehydrogenase
30277579	Pavir.J15755.1	3069	1	-0.297608	0.8136	0.3586	0.5265	misc.glutathione S transferases	AT3G62760.1	Glutathione S-transferase family protein
30248634	Pavir.J22492.1	4997	1	-0.297431	0.8137	0.1927	0.3468	RNA.regulation of transcription.zf-HD	AT3G28920.1	homeobox protein 34
30268118	Pavir.Cb01726.1	5395	1	-0.297431	0.8137	0.6106	0.7527	N/A	AT5G41850.1	alpha/beta-Hydrolases superfamily protein
30242003	Pavir.Ib04508.1	865	2	-0.297431	0.8137	0.2972	0.464	signalling.G-proteins	AT5G59840.1	Ras-related small GTP-binding family protein
30219009	Pavir.J00248.1	1999	21	-0.297431	0.8137	<.0001	<.0001	DNA.synthesis/chromatin structure.histone.H1	AT2G30620.1	winged-helix DNA-binding transcription factor family protein
30186084	Pavir.Fa00243.1	4604	1	-0.297254	0.8138	0.288	0.4552	protein.synthesis.ribosomal protein.eukaryotic.60S subunit.L38	AT3G59540.1	Ribosomal L38e protein family
30250799	Pavir.Aa00017.1	2678	6	-0.296722	0.8141	0.0016	0.0074	minor CHO metabolism.callose	AT5G13000.1	glucan synthase-like 12
30254443	Pavir.J19520.1	5420	1	-0.296013	0.8145	0.2127	0.3707	N/A	AT2G39080.1	NAD(P)-binding Rossmann-fold superfamily protein
30233408	Pavir.Ab02249.1	4570	4	-0.295836	0.8146	0.0001	0.0006	N/A	AT2G43950.1	chloroplast outer envelope protein 37
30196064	Pavir.J35466.1	2904	6	-0.295836	0.8146	0.0003	0.0017	amino acid metabolism.synthesis.aromatic aa.phenylalanine and tyrosine	AT1G80360.1	Pyridoxal phosphate (PLP)-dependent transferases superfamily protein
30301964	Pavir.J39615.1	2846	4	-0.295659	0.8147	0.0127	0.0422	N/A	AT4G31530.1	NAD(P)-binding Rossmann-fold superfamily protein
30269358	Pavir.Cb01473.1	5370	1	-0.295482	0.8148	0.4973	0.6573	N/A	AT1G07090.1	Protein of unknown function (DUF640)
30303443	Pavir.Ga00361.1	567	16	-0.295128	0.815	0.0001	0.0006	N/A	AT4G21445.1	N/A
30291971	Pavir.Ba00488.1	3936	2	-0.294951	0.8151	0.1804	0.3305	major CHO metabolism.degradation.starch.D enzyme	AT5G64860.1	disproportionating enzyme
30188199	Pavir.Fa00991.1	3664	4	-0.294597	0.8153	0.0017	0.0078	not assigned.no ontology	AT5G13020.1	Emsy N Terminus (ENT)/ plant Tudor-like domains-containing protein
30261067	Pavir.Db01232.1	3551	4	-0.294243	0.8155	0.1963	0.3509	N/A	AT1G15400.3	N/A
30314109	Pavir.Eb00050.1	5388	1	-0.293889	0.8157	0.3538	0.5214	glycolysis.unclear/dually targeted.phosphoglycerate mutase	AT5G22620.1	phosphoglycerate/bisphosphoglycerate mutase family protein
30309944	Pavir.Eb01979.1	3794	1	-0.293536	0.8159	0.2859	0.4533	minor CHO metabolism.others	AT5G66530.1	Galactose mutarotase-like superfamily protein
30247361	Pavir.J13477.1	3412	7	-0.293536	0.8159	0.0005	0.0027	N/A	AT2G43945.1	N/A
30311818	Pavir.Eb03897.1	746	48	-0.293359	0.816	<.0001	<.0001	PS.lightreaction.NADH DH	AT1G74880.1	NAD(P)H:plastoquinone dehydrogenase complex subunit O
30214843	Pavir.Ia00485.1	1089	24	-0.293182	0.8161	<.0001	<.0001	PS.calvin cycle.Rib5P Isomerase	AT5G44520.1	NagB/RpiA/CoA transferase-like superfamily protein
30280415	Pavir.Fb00688.1	896	5	-0.293182	0.8161	0.003	0.0126	TCA / org transformation.TCA.pyruvate DH.E1	AT5G50850.1	Transketolase family protein
30275764	Pavir.J38870.1	897	28	-0.293005	0.8162	<.0001	<.0001	minor CHO metabolism.others	AT1G06690.1	NAD(P)-linked oxidoreductase superfamily protein
30241167	Pavir.Ib00399.1	2259	12	-0.292829	0.8163	<.0001	<.0001	not assigned.no ontology	AT5G43745.1	Protein of unknown function (DUF1012)
30312363	Pavir.Eb01081.1	1936	2	-0.292475	0.8165	0.1742	0.3233	signalling.G-proteins	AT5G19320.1	RAN GTPase activating protein 2
30191398	Pavir.Da00569.1	283	6	-0.292299	0.8166	0.0004	0.0022	PS.calvin cycle.aldolase	AT4G26530.1	Aldolase superfamily protein
30271905	Pavir.J05691.1	2821	5	-0.292299	0.8166	0.0003	0.0017	N/A	AT2G38540.1	lipid transfer protein 1
30263653	Pavir.J15418.1	2831	7	-0.292299	0.8166	0.0007	0.0036	protein.degradation.metalloprotease	AT1G05140.1	Peptidase M50 family protein
30205274	Pavir.Ca00874.1	43	12	-0.292122	0.8167	0.0013	0.0062	mitochondrial electron transport / ATP synthesis.F1-ATPase	AT5G08690.1	ATP synthase alpha/beta family protein
30259800	Pavir.J36679.1	1972	2	-0.292122	0.8167	0.169	0.3166	RNA.regulation of transcription.MYB-related transcription factor family	AT1G09770.1	cell division cycle 5
30226656	Pavir.Ea00204.1	1866	7	-0.291945	0.8168	0.002	0.009	transport.metabolite transporters at the mitochondrial membrane	AT5G19760.1	Mitochondrial substrate carrier family protein
30248508	Pavir.J12792.1	4748	2	-0.291945	0.8168	0.2799	0.4472	N/A	AT3G12650.1	N/A
30286165	Pavir.J34635.1	612	14	-0.291769	0.8169	<.0001	<.0001	tetrapyrrole synthesis.glu-tRNA synthetase	AT1G48520.1	GLU-ADT subunit B
30309816	Pavir.Eb02429.1	3297	2	-0.291415	0.8171	0.0389	0.1053	N/A	AT3G51500.1	N/A
30239823	Pavir.Ib00352.1	2765	1	-0.291062	0.8173	0.2615	0.4267	misc.glutathione S transferases	AT2G47730.1	glutathione S-transferase phi 8
30217897	Pavir.J33992.1	405	1	-0.290886	0.8174	0.2791	0.4464	PS.photorespiration.hydroxypyruvate reductase	AT1G68010.1	hydroxypyruvate reductase
30256287	Pavir.J04617.1	2041	10	-0.290709	0.8175	<.0001	<.0001	signalling.calcium	AT4G23650.1	calcium-dependent protein kinase 6
30286707	Pavir.J24854.1	4704	3	-0.290533	0.8176	0.0102	0.0352	signalling.calcium	AT5G03040.1	IQ-domain 2
30212606	Pavir.Ia02215.1	3396	5	-0.290004	0.8179	0.0009	0.0045	RNA.regulation of transcription.MYB-related transcription factor family	AT5G47390.1	myb-like transcription factor family protein
30277529	Pavir.J02127.1	4995	2	-0.289827	0.818	0.0939	0.2049	development.unspecified	AT5G12130.1	integral membrane TerC family protein
30200052	Pavir.J02817.1	811	4	-0.289475	0.8182	0.0138	0.0451	secondary metabolism.isoprenoids.non-mevalonate pathway.CMS	AT2G02500.1	Nucleotide-diphospho-sugar transferases superfamily protein
30303812	Pavir.Ga01310.1	3050	5	-0.289298	0.8183	0.0018	0.0082	TCA / org transformation.TCA.IDH	AT5G14590.1	Isocitrate/isopropylmalate dehydrogenase family protein
30232065	Pavir.Ab02410.1	827	10	-0.289298	0.8183	0.0002	0.0012	redox.ascorbate and glutathione	AT3G48890.1	membrane-associated progesterone binding protein 3
30265622	Pavir.Hb00643.1	3213	3	-0.288946	0.8185	0.1402	0.2779	N/A	N/A	N/A
30290485	Pavir.Ba03746.1	3345	5	-0.288593	0.8187	0.0145	0.0466	misc.beta 1 3 glucan hydrolases.glucan endo-1 3-beta-glucosidase	AT2G19440.1	O-Glycosyl hydrolases family 17 protein
30226227	Pavir.Ea02023.1	4206	4	-0.288417	0.8188	0.2245	0.3856	N/A	AT2G39080.1	NAD(P)-binding Rossmann-fold superfamily protein
30239577	Pavir.Ib02425.1	4479	1	-0.288241	0.8189	0.0956	0.2076	protein.postranslational modification.kinase.receptor like cytoplasmatic kinase II	AT4G35230.1	BR-signaling kinase 1
30311469	Pavir.Eb02622.1	2178	1	-0.288065	0.819	0.0432	0.1139	PS.photorespiration.glycine cleavage.P subunit	AT2G26080.1	glycine decarboxylase P-protein 2
30212033	Pavir.Ia04676.1	406	1	-0.288065	0.819	0.4583	0.6233	protein.targeting.mitochondria	AT3G02090.1	Insulinase (Peptidase family M16) protein
30267881	Pavir.Cb00991.1	4198	2	-0.288065	0.819	0.0017	0.0078	C1-metabolism.glycine hydroxymethyltransferase	AT4G13930.1	serine hydroxymethyltransferase 4
30217826	Pavir.J00025.1	3979	2	-0.288065	0.819	0.0099	0.0343	RNA.regulation of transcription.TCP transcription factor family	AT1G58100.1	TCP family transcription factor
30187559	Pavir.Fa01512.1	1569	18	-0.287889	0.8191	0.0025	0.0109	RNA.regulation of transcription.CCAAT box binding factor family DR1	AT5G08190.2	nuclear factor Y, subunit B12
30296727	Pavir.Bb03172.1	4182	3	-0.287712	0.8192	0.0097	0.0338	S-assimilation.AKN	AT3G03900.1	adenosine-5\'-phosphosulfate (APS) kinase 3
30292548	Pavir.Ba02292.1	5051	2	-0.28736	0.8194	0.0575	0.1423	stress.abiotic.unspecified	AT3G62020.1	germin-like protein 10
30307646	Pavir.J01706.1	2220	2	-0.287184	0.8195	0.1254	0.2563	signalling.G-proteins	AT1G09630.1	RAB GTPase 11C
30186121	Pavir.Fa01202.1	2885	3	-0.287184	0.8195	0.3467	0.5154	N/A	N/A	N/A
30260676	Pavir.Db01883.1	4852	2	-0.286656	0.8198	0.2405	0.4039	N/A	AT3G48690.1	alpha/beta-Hydrolases superfamily protein
30289403	Pavir.Ba02450.1	4839	3	-0.286656	0.8198	0.0345	0.0954	N/A	AT3G52155.1	Phosphoglycerate mutase family protein
30215244	Pavir.Ia00078.1	454	56	-0.28648	0.8199	<.0001	<.0001	PS.lightreaction.cyclic electron flow-chlororespiration	AT4G22890.5	PGR5-LIKE A
30209722	Pavir.Ia02555.1	4220	3	-0.28648	0.8199	0.1836	0.3352	N/A	ATCG00270.1	photosystem II reaction center protein D
30191579	Pavir.Da02222.1	771	26	-0.286304	0.82	<.0001	<.0001	N/A	AT5G27560.1	Domain of unknown function (DUF1995)
30214261	Pavir.Ia01336.1	4393	2	-0.286128	0.8201	0.0538	0.1353	not assigned.no ontology	AT1G55930.1	CBS domain-containing protein / transporter associated domain-containing protein
30189139	Pavir.J09513.1	482	49	-0.285952	0.8202	<.0001	<.0001	N/A	ATCG00270.1	photosystem II reaction center protein D
30291416	Pavir.Ba01376.1	2847	7	-0.285952	0.8202	0.0553	0.1382	protein.aa activation.valine-tRNA ligase	AT1G14610.1	valyl-tRNA synthetase / valine--tRNA ligase (VALRS)
30207094	Pavir.Ca02037.1	4289	3	-0.285952	0.8202	0.008	0.0287	RNA.regulation of transcription.C3H zinc finger family	AT3G02830.1	zinc finger protein 1
30285754	Pavir.J34994.1	1673	2	-0.285601	0.8204	0.3519	0.5196	N/A	AT2G37660.1	NAD(P)-binding Rossmann-fold superfamily protein
30278243	Pavir.Fb01087.1	3428	4	-0.285601	0.8204	0.0002	0.0012	nucleotide metabolism.synthesis.pyrimidine.aspartate transcarbamoylase	AT3G20330.1	PYRIMIDINE B
30222393	Pavir.Gb00853.1	3681	6	-0.285073	0.8207	0.0092	0.0325	signalling.calcium	AT4G35310.1	calmodulin-domain protein kinase 5
30243624	Pavir.J35977.1	3613	7	-0.285073	0.8207	0.0038	0.0155	N/A	ATMG00640.1	hydrogen ion transporting ATP synthases, rotational mechanism;zinc ion binding
30284019	Pavir.J24274.1	3605	3	-0.285073	0.8207	0.1546	0.2985	N/A	AT3G48200.1	N/A
30229467	Pavir.Ea03681.1	1489	11	-0.284546	0.821	<.0001	<.0001	protein.targeting.secretory pathway.unspecified	AT4G09160.1	SEC14 cytosolic factor family protein / phosphoglyceride transfer family protein
30220128	Pavir.J01004.1	341	1	-0.284019	0.8213	0.3472	0.5157	cell.organisation	AT5G09810.1	actin 7
30296264	Pavir.J03017.1	2922	1	-0.283843	0.8214	0.469	0.632	protein.targeting.peroxisomes	AT5G62810.1	peroxin 14
30308980	Pavir.Eb03232.1	140	50	-0.283843	0.8214	<.0001	<.0001	amino acid metabolism.synthesis.central amino acid metabolism.aspartate.aspartate aminotransferase	AT5G11520.1	aspartate aminotransferase 3
30220164	Pavir.J28511.1	3481	5	-0.283668	0.8215	0.0221	0.0664	tetrapyrrole synthesis.magnesium chelatase	AT5G13630.1	magnesium-chelatase subunit chlH, chloroplast, putative / Mg-protoporphyrin IX chelatase, putative (CHLH)
30318635	Pavir.Ha01744.1	5027	2	-0.283492	0.8216	0.0147	0.0471	RNA.regulation of transcription.putative transcription regulator	AT5G09850.1	Transcription elongation factor (TFIIS) family protein
30297117	Pavir.Bb00671.1	3026	4	-0.283316	0.8217	0.0349	0.0961	RNA.transcription	AT3G52090.1	DNA-directed RNA polymerase, RBP11-like
30306102	Pavir.J00993.1	1303	25	-0.283316	0.8217	<.0001	<.0001	stress.abiotic.heat	AT5G04890.1	HSP20-like chaperones superfamily protein
30254131	Pavir.J02160.1	4210	1	-0.282965	0.8219	0.1402	0.2779	N/A	AT5G37480.1	N/A
30302818	Pavir.Ga01591.1	1590	2	-0.28279	0.822	0.0819	0.1851	protein.synthesis.initiation	AT3G26400.1	eukaryotic translation initiation factor 4B1
30227579	Pavir.Ea02392.1	4977	1	-0.282614	0.8221	0.317	0.4854	lipid metabolism.FA synthesis and FA elongation.long chain fatty acid CoA ligase	AT4G23850.1	AMP-dependent synthetase and ligase family protein
30266106	Pavir.Hb00355.1	4290	1	-0.282439	0.8222	0.4977	0.6575	protein.aa activation.serine-tRNA ligase	AT1G11870.2	Seryl-tRNA synthetase
30277138	Pavir.J19730.1	3025	4	-0.282439	0.8222	0.0403	0.1081	protein.synthesis.ribosomal protein.prokaryotic.unknown organellar.50S subunit.L17	AT5G64650.1	Ribosomal protein L17 family protein
30278309	Pavir.Fb02055.1	3291	7	-0.282263	0.8223	0.0004	0.0022	DNA.synthesis/chromatin structure.histone.core.H2B	AT5G59910.1	Histone superfamily protein
30215824	Pavir.Ia02214.1	5591	2	-0.282088	0.8224	0.5246	0.6804	N/A	N/A	N/A
30192393	Pavir.Da02251.1	4789	1	-0.281737	0.8226	0.2375	0.4008	nucleotide metabolism.salvage.NUDIX hydrolases	AT5G20070.1	nudix hydrolase homolog 19
30203810	Pavir.Ca00381.1	4619	3	-0.281386	0.8228	0.0394	0.1061	misc.oxidases - copper flavone etc	AT5G16970.1	alkenal reductase
30242087	Pavir.Ib01718.1	3587	4	-0.281211	0.8229	0.005	0.0196	N/A	N/A	N/A
30317145	Pavir.Ha00431.1	363	10	-0.281036	0.823	<.0001	<.0001	cell.organisation	AT3G23400.1	Plastid-lipid associated protein PAP / fibrillin family protein
30314039	Pavir.Eb00348.1	2163	18	-0.281036	0.823	<.0001	<.0001	N/A	AT2G25670.1	N/A
30250445	Pavir.Aa00426.1	3264	3	-0.28086	0.8231	0.092	0.2017	development.unspecified	AT1G70680.1	Caleosin-related family protein
30273640	Pavir.J01132.1	1893	2	-0.28086	0.8231	0.0209	0.0632	signalling.G-proteins	AT4G17170.1	RAB GTPase homolog B1C
30279249	Pavir.Fb02222.1	243	55	-0.280685	0.8232	<.0001	<.0001	redox.dismutases and catalases	AT2G28190.1	copper/zinc superoxide dismutase 2
30230605	Pavir.Ea03471.1	3730	5	-0.28051	0.8233	0.0018	0.0082	N/A	AT1G65230.1	Uncharacterized conserved protein (DUF2358)
30205476	Pavir.Ca00388.1	62	5	-0.280335	0.8234	0.0057	0.0218	protein.degradation.serine protease	AT5G50920.1	CLPC homologue 1
30317344	Pavir.Ha00878.1	4543	3	-0.280335	0.8234	0.0046	0.0183	misc.short chain dehydrogenase/reductase (SDR)	AT5G02540.1	NAD(P)-binding Rossmann-fold superfamily protein
30289512	Pavir.Ba03415.1	3627	4	-0.280335	0.8234	0.2518	0.4165	N/A	N/A	N/A
30253241	Pavir.Aa00008.1	2926	7	-0.279984	0.8236	0.0026	0.0112	cell.division.plastid	AT2G21280.1	NAD(P)-binding Rossmann-fold superfamily protein
30204592	Pavir.Ca01080.1	5056	2	-0.279984	0.8236	0.0024	0.0105	N/A	N/A	N/A
30201532	Pavir.J09586.1	4493	3	-0.279809	0.8237	0.0242	0.0717	N/A	AT5G58990.1	N/A
30296996	Pavir.Bb02867.1	114	28	-0.279459	0.8239	<.0001	<.0001	PS.lightreaction.ATP synthase.gamma chain	AT4G04640.1	ATPase, F1 complex, gamma subunit protein
30220755	Pavir.J10267.1	3815	3	-0.279459	0.8239	0.065	0.1561	not assigned.no ontology	AT5G16730.1	Plant protein of unknown function (DUF827)
30241486	Pavir.Ib03344.1	2067	6	-0.279459	0.8239	0.0286	0.0822	N/A	AT2G16940.2	Splicing factor, CC1-like
30243199	Pavir.J01025.1	3893	3	-0.279459	0.8239	0.118	0.2441	protein.targeting.secretory pathway.vacuole	AT1G75850.1	VPS35 homolog B
30268976	Pavir.Cb01040.1	5328	1	-0.279284	0.824	0.2006	0.3565	RNA.regulation of transcription.unclassified	AT5G63260.2	Zinc finger C-x8-C-x5-C-x3-H type family protein
30317020	Pavir.Ha00406.1	4681	1	-0.279284	0.824	0.2215	0.3818	transport.ABC transporters and multidrug resistance systems	AT5G64840.1	general control non-repressible 5
30305438	Pavir.Ga01495.1	1157	1	-0.278934	0.8242	0.2054	0.362	protein.synthesis.ribosomal protein.eukaryotic.60S subunit.L14	AT2G20450.1	Ribosomal protein L14
30226772	Pavir.Ea02825.1	1039	12	-0.278934	0.8242	0.0023	0.0102	not assigned.no ontology	AT5G65770.1	little nuclei4
30291238	Pavir.Ba04043.1	116	56	-0.278759	0.8243	<.0001	<.0001	N/A	AT5G01410.1	Aldolase-type TIM barrel family protein
30191168	Pavir.J01051.1	4953	2	-0.278759	0.8243	0.0668	0.1593	misc.gluco- galacto- and mannosidases	AT1G02850.2	beta glucosidase 11
30211224	Pavir.Ia03619.1	1901	19	-0.278409	0.8245	<.0001	<.0001	not assigned.no ontology	AT2G37240.1	Thioredoxin superfamily protein
30225901	Pavir.J30404.1	4116	3	-0.278234	0.8246	0.167	0.3146	lipid metabolism.FA synthesis and FA elongation.acyl coa ligase	AT3G23790.1	AMP-dependent synthetase and ligase family protein
30201365	Pavir.J39839.1	2080	8	-0.278234	0.8246	<.0001	<.0001	N/A	AT1G29700.1	Metallo-hydrolase/oxidoreductase superfamily protein
30297790	Pavir.Bb01166.1	2006	11	-0.278059	0.8247	<.0001	<.0001	misc.short chain dehydrogenase/reductase (SDR)	AT4G03140.1	NAD(P)-binding Rossmann-fold superfamily protein
30297635	Pavir.Bb00644.1	4539	4	-0.277884	0.8248	0.0275	0.0796	cell.vesicle transport	AT2G32670.1	vesicle-associated membrane protein 725
30244300	Pavir.J15987.1	3253	4	-0.277534	0.825	0.0227	0.0679	major CHO metabolism.degradation.starch.starch phosphorylase	AT3G29320.1	Glycosyl transferase, family 35
30239479	Pavir.Ib04494.1	1371	7	-0.277359	0.8251	0.0096	0.0335	cell.organisation	AT4G35450.1	ankyrin repeat-containing protein 2
30221005	Pavir.J39566.1	1980	3	-0.277359	0.8251	0.043	0.1136	not assigned.no ontology	AT5G12040.1	Nitrilase/cyanide hydratase and apolipoprotein N-acyltransferase family protein
30304157	Pavir.Ga01795.1	1666	16	-0.277359	0.8251	<.0001	<.0001	stress.abiotic.light	AT5G63860.1	Regulator of chromosome condensation (RCC1) family protein
30232633	Pavir.Ab00382.1	3756	2	-0.277009	0.8253	0.089	0.1965	N/A	AT5G24630.6	double-stranded DNA binding
30288748	Pavir.Ba01704.1	610	10	-0.277009	0.8253	<.0001	<.0001	N/A	AT2G17350.1	N/A
30276420	Pavir.J40529.1	1794	1	-0.27666	0.8255	0.1866	0.3395	redox.thioredoxin	AT1G50320.1	thioredoxin X
30310796	Pavir.Eb02057.1	4240	2	-0.27666	0.8255	0.0518	0.1312	N/A	AT2G34090.1	maternal effect embryo arrest 18
30276961	Pavir.J30141.1	772	56	-0.276485	0.8256	<.0001	<.0001	protein.degradation.serine protease	AT5G23140.1	nuclear-encoded CLP protease P7
30225644	Pavir.J10467.1	585	3	-0.276485	0.8256	0.1618	0.3081	protein.synthesis.ribosomal protein.eukaryotic.40S subunit.S18	AT1G34030.1	Ribosomal protein S13/S18 family
30297231	Pavir.Bb01875.1	1184	26	-0.276136	0.8258	<.0001	<.0001	secondary metabolism.phenylpropanoids.lignin biosynthesis.CAD	AT4G37980.1	elicitor-activated gene 3-1
30230417	Pavir.Ea01806.1	3669	4	-0.275961	0.8259	0.0594	0.1457	not assigned.no ontology	AT3G47560.1	alpha/beta-Hydrolases superfamily protein
30194122	Pavir.Da01316.1	3631	2	-0.275961	0.8259	0.0111	0.0377	signalling.in sugar and nutrient physiology	AT4G08950.1	Phosphate-responsive 1 family protein
30199849	Pavir.J02788.1	4759	2	-0.275786	0.826	0.0201	0.0612	RNA.regulation of transcription.WRKY domain transcription factor family	AT1G62300.1	WRKY family transcription factor
30236492	Pavir.Ab02467.1	4959	1	-0.275612	0.8261	0.0044	0.0176	lipid metabolism.lipid degradation.beta-oxidation.enoyl CoA hydratase	AT4G16800.1	ATP-dependent caseinolytic (Clp) protease/crotonase family protein
30223152	Pavir.Gb00190.1	2540	1	-0.275612	0.8261	0.0727	0.1686	N/A	AT4G31430.2	N/A
30263492	Pavir.J05511.1	3272	1	-0.275437	0.8262	0.0888	0.1964	N/A	AT3G10650.1	N/A
30238910	Pavir.Ib00203.1	3821	4	-0.275437	0.8262	0.037	0.1008	misc.glutathione S transferases	AT2G47730.1	glutathione S-transferase phi 8
30223474	Pavir.Gb00086.1	2745	8	-0.275262	0.8263	0.0222	0.0666	nucleotide metabolism.phosphotransfer and pyrophosphatases.adenylate kinase	AT2G39270.1	P-loop containing nucleoside triphosphate hydrolases superfamily protein
30304609	Pavir.Ga00202.1	5235	1	-0.274739	0.8266	0.2292	0.3918	protein.degradation	AT1G14570.1	UBX domain-containing protein
30205882	Pavir.Ca02289.1	4495	1	-0.274739	0.8266	0.2313	0.3945	RNA.regulation of transcription.unclassified	AT5G10770.1	Eukaryotic aspartyl protease family protein
30297692	Pavir.Bb00960.1	2784	8	-0.274739	0.8266	0.0027	0.0116	major CHO metabolism.synthesis.starch.starch synthase	AT1G32900.1	UDP-Glycosyltransferase superfamily protein
30208723	Pavir.J40505.1	864	4	-0.27439	0.8268	0.0017	0.0078	not assigned.no ontology	AT5G62740.1	SPFH/Band 7/PHB domain-containing membrane-associated protein family
30189797	Pavir.J20466.1	1022	2	-0.273343	0.8274	0.2116	0.3692	signalling.14-3-3 proteins	AT3G02520.1	general regulatory factor 7
30304432	Pavir.Ga01080.1	2898	1	-0.27282	0.8277	0.169	0.3166	cell.organisation	AT4G00030.1	Plastid-lipid associated protein PAP / fibrillin family protein
30288428	Pavir.Ba00210.1	2310	1	-0.272646	0.8278	0.3977	0.5654	cell wall.precursor synthesis.UXS	AT3G62830.1	NAD(P)-binding Rossmann-fold superfamily protein
30240355	Pavir.Ib00606.1	1539	13	-0.272646	0.8278	<.0001	<.0001	major CHO metabolism.degradation.starch.laforin like phosphoglucan phosphatase (SEX4)	AT3G52180.1	dual specificity protein phosphatase (DsPTP1) family protein
30300715	Pavir.Bb01334.1	2245	2	-0.272646	0.8278	0.1151	0.2396	RNA.regulation of transcription.HB Homeobox transcription factor family	AT3G18380.1	sequence-specific DNA binding transcription factors;sequence-specific DNA binding
30309033	Pavir.Eb02693.1	5519	1	-0.272472	0.8279	0.0679	0.1612	N/A	AT2G42975.1	N/A
30304290	Pavir.Ga00276.1	5008	1	-0.272472	0.8279	0.0698	0.1642	protein.synthesis.ribosomal protein.eukaryotic.60S subunit.L19	AT1G02780.1	Ribosomal protein L19e family protein
30258869	Pavir.J12068.1	4483	1	-0.272472	0.8279	0.3602	0.5279	cell wall.pectin*esterases.PME	AT2G26440.1	Plant invertase/pectin methylesterase inhibitor superfamily
30247688	Pavir.J31252.1	1773	2	-0.272123	0.8281	0.0415	0.1106	N/A	AT1G01080.1	RNA-binding (RRM/RBD/RNP motifs) family protein
30301049	Pavir.Bb00776.1	3630	5	-0.272123	0.8281	0.009	0.0319	RNA.regulation of transcription.SNF7	AT2G06530.1	SNF7 family protein
30217581	Pavir.J40502.1	3089	12	-0.271775	0.8283	0.0004	0.0022	N/A	N/A	N/A
30226966	Pavir.Ea04129.1	4902	1	-0.271252	0.8286	0.2373	0.4006	N/A	N/A	N/A
30242027	Pavir.Ib01301.1	1908	2	-0.271078	0.8287	0.1613	0.3072	PS.lightreaction.photosystem II.PSII polypeptide subunits	AT2G39470.1	PsbP-like protein 2
30269177	Pavir.Cb00570.1	3045	7	-0.271078	0.8287	0.0071	0.026	N/A	N/A	N/A
30204806	Pavir.Ca01671.1	3577	10	-0.27073	0.8289	<.0001	<.0001	N/A	ATCG01120.1	chloroplast ribosomal protein S15
30201668	Pavir.J01407.1	4675	2	-0.27073	0.8289	0.1967	0.3511	protein.synthesis	AT1G64790.1	ILITYHIA
30303225	Pavir.Ga01035.1	3889	2	-0.27073	0.8289	0.1717	0.3198	secondary metabolism.isoprenoids.carotenoids.phytoene dehydrogenase	AT4G14210.1	phytoene desaturase 3
30213725	Pavir.Ia01588.1	4964	2	-0.270556	0.829	0.0026	0.0112	N/A	AT3G60600.1	vesicle associated protein
30227194	Pavir.Ea02003.1	2592	6	-0.270208	0.8292	0.0262	0.0765	protein.targeting.chloroplast	AT4G01800.1	Albino or Glassy Yellow 1
30213873	Pavir.Ia04185.1	2607	4	-0.270034	0.8293	0.0843	0.1892	signalling.calcium	AT3G13460.1	evolutionarily conserved C-terminal region 2
30313091	Pavir.Eb01941.1	2555	5	-0.269338	0.8297	0.0354	0.0974	protein.degradation.metalloprotease	AT5G53170.1	FTSH protease 11
30204606	Pavir.Ca01754.1	5512	1	-0.269164	0.8298	0.3059	0.4736	N/A	AT2G46540.1	N/A
30273756	Pavir.J13446.1	4152	2	-0.269164	0.8298	0.3656	0.5337	N/A	AT4G13220.1	N/A
30272970	Pavir.J04930.1	2839	8	-0.268991	0.8299	<.0001	<.0001	stress.abiotic.touch/wounding	AT1G21610.2	wound-responsive family protein
30222824	Pavir.Gb00533.1	5503	1	-0.268643	0.8301	0.6336	0.7688	misc.protease inhibitor/seed storage/lipid transfer protein (LTP) family protein	AT3G22142.1	Bifunctional inhibitor/lipid-transfer protein/seed storage 2S albumin superfamily protein
30244555	Pavir.J09852.1	1274	15	-0.268643	0.8301	<.0001	<.0001	transport.metabolite transporters at the mitochondrial membrane	AT5G46800.1	Mitochondrial substrate carrier family protein
30300287	Pavir.Bb03211.1	2697	2	-0.268643	0.8301	0.1635	0.3102	DNA.synthesis/chromatin structure	AT5G67630.1	P-loop containing nucleoside triphosphate hydrolases superfamily protein
30260080	Pavir.Db02015.1	3498	1	-0.268295	0.8303	0.4142	0.5798	not assigned.no ontology	AT5G03370.1	acylphosphatase family
30302784	Pavir.Ga01031.1	2942	6	-0.268295	0.8303	0.0078	0.0282	secondary metabolism.phenylpropanoids.lignin biosynthesis	AT3G50740.1	UDP-glucosyl transferase 72E1
30234336	Pavir.Ab02988.1	1219	20	-0.267948	0.8305	<.0001	<.0001	N/A	AT1G18730.1	NDH dependent flow 6
30185928	Pavir.Fa00375.1	5284	2	-0.267948	0.8305	0.0452	0.1181	signalling.in sugar and nutrient physiology	AT4G15900.1	pleiotropic regulatory locus 1
30287750	Pavir.J12172.1	1944	14	-0.267253	0.8309	0.0002	0.0012	amino acid metabolism.synthesis.central amino acid metabolism.aspartate.aspartate aminotransferase	AT2G30970.1	aspartate aminotransferase 1
30206816	Pavir.Ca00257.1	1288	22	-0.267253	0.8309	<.0001	<.0001	nucleotide metabolism.degradation	AT5G63980.1	Inositol monophosphatase family protein
30306560	Pavir.J08581.1	518	14	-0.267253	0.8309	<.0001	<.0001	N/A	AT4G15545.1	N/A
30208305	Pavir.J25136.1	3496	5	-0.26708	0.831	0.0143	0.0462	not assigned.no ontology	AT3G57910.1	D111/G-patch domain-containing protein
30281205	Pavir.Fb00091.1	4170	7	-0.26708	0.831	0.0353	0.0971	signalling.phosphinositides.phosphoinositide phospholipase C	AT4G36945.1	PLC-like phosphodiesterases superfamily protein
30224763	Pavir.Gb01223.1	5575	1	-0.266732	0.8312	0.0954	0.2072	transport.unspecified cations	AT1G16010.1	magnesium transporter 2
30296879	Pavir.Bb02184.1	4907	2	-0.266732	0.8312	0.0014	0.0066	protein.synthesis.ribosomal protein.eukaryotic.60S subunit.L34	AT5G39785.1	Protein of unknown function (DUF1666)
30252741	Pavir.Aa00697.1	3322	3	-0.266559	0.8313	0.0472	0.1221	not assigned.no ontology.BSD domain-containing protein	AT1G26300.1	BSD domain-containing protein
30304074	Pavir.Ga00297.1	961	9	-0.266559	0.8313	0.0013	0.0062	protein.degradation.cysteine protease	AT1G47128.1	Granulin repeat cysteine protease family protein
30186465	Pavir.Fa00721.1	3330	5	-0.266559	0.8313	0.0216	0.065	hormone metabolism.jasmonate.synthesis-degradation.12-Oxo-PDA-reductase	AT2G06050.1	oxophytodienoate-reductase 3
30251996	Pavir.Aa01557.1	3456	5	-0.266385	0.8314	0.007	0.0257	signalling.receptor kinases.leucine rich repeat II	AT1G71830.1	somatic embryogenesis receptor-like kinase 1
30236911	Pavir.Ib04241.1	5588	1	-0.266212	0.8315	0.5367	0.6898	N/A	N/A	N/A
30251486	Pavir.Aa00420.1	2612	7	-0.266038	0.8316	0.0035	0.0144	N-metabolism.ammonia metabolism.glutamine synthetase	AT5G37600.1	glutamine synthase clone R1
30205294	Pavir.Ca02041.1	4318	3	-0.265865	0.8317	0.1727	0.321	major CHO metabolism.degradation.starch.glucan water dikinase	AT5G26570.1	catalytics;carbohydrate kinases;phosphoglucan, water dikinases
30316333	Pavir.Ha00864.1	4714	4	-0.265518	0.8319	0.2969	0.464	stress.biotic.PR-proteins	AT1G65870.1	Disease resistance-responsive (dirigent-like protein) family protein
30224559	Pavir.Gb00029.1	3739	6	-0.265345	0.832	0.0018	0.0082	protein.degradation.cysteine protease	AT5G43060.1	Granulin repeat cysteine protease family protein
30303246	Pavir.Ga02554.1	2849	8	-0.264651	0.8324	<.0001	<.0001	N/A	ATCG00800.1	structural constituent of ribosome
30307258	Pavir.J08809.1	520	3	-0.264478	0.8325	0.0062	0.0233	TCA / org transformation.TCA.pyruvate DH.E1	AT1G59900.1	pyruvate dehydrogenase complex E1 alpha subunit
30197223	Pavir.J05437.1	4227	3	-0.264305	0.8326	0.1414	0.2794	nucleotide metabolism.degradation	AT2G26230.1	uricase / urate oxidase / nodulin 35, putative
30249313	Pavir.Aa02392.1	3043	7	-0.263958	0.8328	0.0129	0.0427	mitochondrial electron transport / ATP synthesis.NADH-DH.complex I.carbonic anhydrase	AT3G48680.1	gamma carbonic anhydrase-like 2
30236629	Pavir.Ab00791.1	957	3	-0.263612	0.833	0.0096	0.0335	protein.synthesis.elongation	AT1G57720.1	Translation elongation factor EF1B, gamma chain
30229173	Pavir.Ea03210.1	4827	1	-0.263265	0.8332	0.3339	0.5039	not assigned.no ontology	AT3G08640.1	Protein of unknown function (DUF3411)
30279281	Pavir.Fb01263.1	2525	1	-0.262919	0.8334	0.296	0.463	redox.thioredoxin	AT3G06730.1	Thioredoxin z
30205810	Pavir.Ca01036.1	1078	12	-0.262746	0.8335	0.0005	0.0027	not assigned.no ontology	AT4G39470.1	Tetratricopeptide repeat (TPR)-like superfamily protein
30289593	Pavir.Ba00045.1	5298	1	-0.262573	0.8336	0.1544	0.2983	protein.degradation	AT1G56700.1	Peptidase C15, pyroglutamyl peptidase I-like
30269606	Pavir.Cb01444.1	2384	7	-0.2624	0.8337	0.0042	0.0169	lipid metabolism.glycolipid synthesis.UDP-sulfoquinovose synthase	AT4G33030.1	sulfoquinovosyldiacylglycerol 1
30242831	Pavir.Ib00100.1	3729	3	-0.262227	0.8338	0.2435	0.4072	protein.postranslational modification	AT4G10730.1	Protein kinase superfamily protein
30239636	Pavir.Ib03376.1	2736	4	-0.262227	0.8338	0.0107	0.0367	lipid metabolism.'exotics'(steroids. squalene etc)	AT4G36750.1	Quinone reductase family protein
30188525	Pavir.Fa00637.1	534	14	-0.262054	0.8339	0.0001	0.0006	N/A	AT4G09040.1	RNA-binding (RRM/RBD/RNP motifs) family protein
30291380	Pavir.Ba03478.1	1146	3	-0.261881	0.834	0.0068	0.0252	mitochondrial electron transport / ATP synthesis.cytochrome c reductase	AT5G25450.1	Cytochrome bd ubiquinol oxidase, 14kDa subunit
30290547	Pavir.Ba01068.1	1509	5	-0.261881	0.834	0.0361	0.099	protein.synthesis.release	AT3G26618.1	eukaryotic release factor 1-3
30310636	Pavir.Eb00490.1	4888	2	-0.261881	0.834	0.005	0.0196	RNA.regulation of transcription.MYB-related transcription factor family	AT1G49950.1	telomere repeat binding factor 1
30307000	Pavir.J10835.1	3112	6	-0.261881	0.834	0.0002	0.0012	N/A	N/A	N/A
30294814	Pavir.J07644.1	2260	1	-0.261708	0.8341	0.0539	0.1355	signalling.G-proteins	AT3G18820.1	RAB GTPase homolog G3F
30269084	Pavir.Cb00491.1	2128	18	-0.261535	0.8342	<.0001	<.0001	protein.synthesis.ribosomal protein.eukaryotic.60S subunit.L8	AT4G36130.1	Ribosomal protein L2 family
30289348	Pavir.Ba02391.1	2237	8	-0.261362	0.8343	0.0022	0.0098	N/A	AT2G45990.1	N/A
30266709	Pavir.Hb00045.1	1696	17	-0.261189	0.8344	0.0001	0.0006	RNA.processing.splicing	AT3G55460.1	SC35-like splicing factor 30
30231802	Pavir.J00315.1	5355	1	-0.260843	0.8346	0.2389	0.402	RNA.regulation of transcription.unclassified	AT5G59710.1	VIRE2 interacting protein 2
30229084	Pavir.Ea01469.1	1765	3	-0.260843	0.8346	0.1241	0.254	misc.peroxidases	AT4G11290.1	Peroxidase superfamily protein
30311877	Pavir.Eb02153.1	5000	1	-0.26067	0.8347	0.1991	0.3542	N/A	AT4G16144.1	associated molecule with the SH3 domain of STAM 3
30229028	Pavir.Ea00280.1	3743	5	-0.260497	0.8348	0.0069	0.0254	protein.aa activation.glutamine-tRNA ligase	AT1G25350.1	glutamine-tRNA ligase, putative / glutaminyl-tRNA synthetase, putative / GlnRS, putative
30198224	Pavir.J08170.1	4770	2	-0.260325	0.8349	0.0861	0.1923	protein.synthesis.initiation	AT1G36730.1	Translation initiation factor IF2/IF5
30208767	Pavir.J25917.1	2092	5	-0.260152	0.835	0.0093	0.0327	not assigned.no ontology	AT4G22360.1	SWIB complex BAF60b domain-containing protein
30242558	Pavir.Ib01082.1	5365	1	-0.259979	0.8351	0.4966	0.6573	amino acid metabolism.synthesis.histidine.N'-5'-phosphoribosyl-formimino-5-aminoimidazole-4-carboxamide ribonucleotide isomerase	AT4G26900.1	HIS HF
30309498	Pavir.Eb03162.1	4929	2	-0.259979	0.8351	0.0823	0.1858	cell wall.cell wall proteins.HRGP	AT4G28300.1	Protein of unknown function (DUF1421)
30297596	Pavir.Bb00687.1	4301	2	-0.259461	0.8354	0.071	0.1658	protein.degradation	AT3G05350.1	Metallopeptidase M24 family protein
30239758	Pavir.Ib00025.1	1935	17	-0.259288	0.8355	<.0001	<.0001	amino acid metabolism.synthesis.aspartate family.lysine.dihydrodipicolinate reductase	AT5G52100.1	Dihydrodipicolinate reductase, bacterial/plant
30204477	Pavir.Ca02766.1	3786	4	-0.259288	0.8355	<.0001	<.0001	N/A	AT5G57040.1	Lactoylglutathione lyase / glyoxalase I family protein
30186001	Pavir.Fa01357.1	3366	4	-0.258598	0.8359	0.0485	0.1244	N-metabolism.ammonia metabolism.unspecified	AT4G25840.1	glycerol-3-phosphatase 1
30282017	Pavir.J11959.1	2564	3	-0.258598	0.8359	0.002	0.009	N/A	AT1G06130.1	glyoxalase 2-4
30282301	Pavir.J38909.1	829	5	-0.258425	0.836	0.0694	0.1635	signalling.G-proteins	AT1G52380.1	NUP50 (Nucleoporin 50 kDa) protein
30252139	Pavir.Aa02263.1	4475	1	-0.258253	0.8361	0.3972	0.5649	signalling.G-proteins	AT5G46070.1	Guanylate-binding family protein
30312478	Pavir.Eb02662.1	1396	9	-0.258253	0.8361	<.0001	<.0001	N/A	AT1G66840.1	Plant protein of unknown function (DUF827)
30232364	Pavir.Ab00635.1	4011	3	-0.25808	0.8362	0.0417	0.1109	misc.beta 1 3 glucan hydrolases.glucan endo-1 3-beta-glucosidase	AT3G15800.1	Glycosyl hydrolase superfamily protein
30190823	Pavir.J14626.1	6	80	-0.257735	0.8364	<.0001	<.0001	PS.calvin cycle.phosphoglycerate kinase	AT1G56190.1	Phosphoglycerate kinase family protein
30314506	Pavir.J29669.1	635	5	-0.257735	0.8364	0.0292	0.0838	protein.synthesis.ribosomal protein.eukaryotic.40S subunit.S13	AT4G00100.1	ribosomal protein S13A
30205375	Pavir.Ca00431.1	12	65	-0.257045	0.8368	<.0001	<.0001	stress.abiotic.heat	AT4G24280.1	chloroplast heat shock protein 70-1
30288320	Pavir.J30655.1	3911	2	-0.257045	0.8368	0.234	0.397	protein.degradation.serine protease	AT5G53350.1	CLP protease regulatory subunit X
30241301	Pavir.Ib03624.1	40	58	-0.2567	0.837	<.0001	<.0001	TCA / org transformation.other organic acid transformatons.malic	AT4G00570.1	NAD-dependent malic enzyme 2
30239879	Pavir.Ib01294.1	837	2	-0.256528	0.8371	0.1417	0.2797	amino acid metabolism.synthesis.glutamate family.arginine.acetylglutamate kinase	AT2G37500.1	arginine biosynthesis protein ArgJ family
30221522	Pavir.Gb01231.1	4661	1	-0.256356	0.8372	0.4552	0.6207	N/A	AT1G55790.2	Domain of unknown function (DUF2431)
30231181	Pavir.Ea03411.1	2099	5	-0.256356	0.8372	0.0238	0.0708	major CHO metabolism.degradation.starch.starch phosphorylase	AT3G46970.1	alpha-glucan phosphorylase 2
30272258	Pavir.J04525.1	3499	1	-0.256183	0.8373	0.5985	0.7428	protein.aa activation.glycine-tRNA ligase	AT1G29880.1	glycyl-tRNA synthetase / glycine--tRNA ligase
30278581	Pavir.Fb01597.1	766	12	-0.256183	0.8373	0.0005	0.0027	PS.lightreaction.photosystem I.LHC-I	AT3G47470.1	light-harvesting chlorophyll-protein complex I subunit A4
30290918	Pavir.Ba02335.1	5394	1	-0.256011	0.8374	0.1562	0.3004	N/A	AT1G78915.1	Tetratricopeptide repeat (TPR)-like superfamily protein
30209461	Pavir.Ia00664.1	749	33	-0.255667	0.8376	<.0001	<.0001	major CHO metabolism.synthesis.starch.AGPase	AT5G19220.1	ADP glucose pyrophosphorylase large subunit 1
30265297	Pavir.Hb01303.1	338	17	-0.255667	0.8376	<.0001	<.0001	misc. other Ferredoxins and Rieske domain	AT1G71500.1	Rieske (2Fe-2S) domain-containing protein
30310693	Pavir.Eb02604.1	3937	3	-0.255494	0.8377	0.0489	0.1251	major CHO metabolism.degradation.starch.starch cleavage.alpha amylase	AT1G69830.1	alpha-amylase-like 3
30222273	Pavir.Gb01723.1	4125	1	-0.255322	0.8378	0.4627	0.6272	protein.targeting.peroxisomes	AT1G12830.1	N/A
30228224	Pavir.Ea02363.1	1565	14	-0.255322	0.8378	0.0005	0.0027	PS.lightreaction.ATP synthase	AT2G31040.1	ATP synthase protein I -related
30241186	Pavir.Ib00746.1	2133	15	-0.255322	0.8378	0.0002	0.0012	mitochondrial electron transport / ATP synthesis.F1-ATPase	AT2G33040.1	gamma subunit of Mt ATP synthase
30212912	Pavir.Ia04272.1	5576	1	-0.25515	0.8379	0.0978	0.2112	N/A	AT3G22430.1	N/A
30270719	Pavir.J01067.1	223	37	-0.254978	0.838	<.0001	<.0001	gluconeogenesis / glyoxylate cycle.Malate DH	AT5G09660.4	peroxisomal NAD-malate dehydrogenase 2
30289580	Pavir.Ba01861.1	1821	17	-0.254978	0.838	0.0002	0.0012	N/A	AT3G43540.1	Protein of unknown function (DUF1350)
30318255	Pavir.Ha00502.1	5197	1	-0.254806	0.8381	0.1118	0.2339	protein.synthesis.ribosomal protein.prokaryotic.unknown organellar.50S subunit.L4	AT2G20060.1	Ribosomal protein L4/L1 family
30280145	Pavir.Fb01186.1	5038	1	-0.254806	0.8381	0.2826	0.4497	amino acid metabolism.synthesis.aspartate family.methionine.homocysteine S-methyltransferase	AT1G78140.1	S-adenosyl-L-methionine-dependent methyltransferases superfamily protein
30261273	Pavir.Db00220.1	3315	4	-0.254634	0.8382	0.0469	0.1217	N/A	AT1G16720.1	high chlorophyll fluorescence phenotype 173
30318367	Pavir.Ha01689.1	899	45	-0.254461	0.8383	<.0001	<.0001	N/A	N/A	N/A
30279174	Pavir.Fb01817.1	2147	5	-0.254117	0.8385	0.0134	0.044	not assigned.no ontology	AT4G39970.1	Haloacid dehalogenase-like hydrolase (HAD) superfamily protein
30228209	Pavir.Ea02064.1	1577	15	-0.254117	0.8385	<.0001	<.0001	RNA.regulation of transcription.MYB-related transcription factor family	AT1G49950.1	telomere repeat binding factor 1
30287513	Pavir.J34549.1	4945	2	-0.253945	0.8386	0.1198	0.2469	stress.biotic.PR-proteins	AT5G42510.1	Disease resistance-responsive (dirigent-like protein) family protein
30313448	Pavir.Eb03247.1	2939	4	-0.253945	0.8386	0.073	0.1691	lipid metabolism.lipid degradation.lysophospholipases.glycerophosphodiester phosphodiesterase	AT5G08030.1	PLC-like phosphodiesterases superfamily protein
30291683	Pavir.Ba02066.1	5423	1	-0.253773	0.8387	0.0933	0.2039	RNA.processing	AT5G15390.1	tRNA/rRNA methyltransferase (SpoU) family protein
30294609	Pavir.J35626.1	1272	9	-0.253773	0.8387	0.0138	0.0451	protein.degradation.ubiquitin.proteasom	AT1G29150.1	non-ATPase subunit 9
30259464	Pavir.J11701.1	1127	15	-0.253429	0.8389	<.0001	<.0001	N/A	AT3G25680.1	N/A
30287314	Pavir.J05890.1	5493	1	-0.253257	0.839	0.511	0.6684	N/A	N/A	N/A
30203356	Pavir.Ca01406.1	2556	2	-0.253085	0.8391	0.2155	0.3744	protein.degradation.cysteine protease	AT1G09850.1	xylem bark cysteine peptidase 3
30235663	Pavir.Ab03250.1	1738	4	-0.252913	0.8392	0.0882	0.1958	N/A	AT1G06190.1	Rho termination factor
30201045	Pavir.J07916.1	5490	1	-0.252742	0.8393	0.4041	0.5712	N/A	AT2G42040.1	N/A
30186664	Pavir.Fa00505.1	626	8	-0.252742	0.8393	0.0454	0.1185	N/A	AT3G63540.1	Mog1/PsbP/DUF1795-like photosystem II reaction center PsbP family protein
30278920	Pavir.Fb00533.1	4156	7	-0.252742	0.8393	0.0029	0.0123	N/A	AT5G46190.1	RNA-binding KH domain-containing protein
30185814	Pavir.Fa01381.1	3637	4	-0.252742	0.8393	0.0279	0.0806	signalling.G-proteins	AT3G49180.1	Transducin/WD40 repeat-like superfamily protein
30185705	Pavir.Fa02288.1	5333	1	-0.252226	0.8396	0.4855	0.6468	development.unspecified	AT1G11430.1	plastid developmental protein DAG, putative
30238162	Pavir.Ib03645.1	3255	5	-0.252226	0.8396	0.1041	0.222	RNA.processing.splicing	AT3G19840.1	pre-mRNA-processing protein 40C
30215472	Pavir.Ia00113.1	1731	3	-0.252226	0.8396	0.1491	0.2907	RNA.processing	AT1G09760.1	U2 small nuclear ribonucleoprotein A
30303203	Pavir.Ga01019.1	3425	4	-0.252054	0.8397	0.0706	0.1653	RNA.regulation of transcription.Nucleosome/chromatin assembly factor group	AT1G20696.1	high mobility group B3
30211230	Pavir.Ia00226.1	1311	4	-0.251882	0.8398	0.0451	0.118	not assigned.no ontology	AT3G06610.1	DNA-binding enhancer protein-related
30245857	Pavir.J17001.1	3996	3	-0.251711	0.8399	0.093	0.2034	N/A	AT1G49820.1	S-methyl-5-thioribose kinase
30288981	Pavir.Ba03722.1	1067	6	-0.251024	0.8403	0.0136	0.0446	PS.calvin cycle.Rib5P Isomerase	AT3G04790.1	Ribose 5-phosphate isomerase, type A protein
30194962	Pavir.J08658.1	4662	2	-0.250852	0.8404	0.1572	0.3019	cell.vesicle transport	AT5G50380.1	exocyst subunit exo70 family protein F1
30191788	Pavir.Da01917.1	3220	7	-0.250852	0.8404	0.0763	0.1751	PS.lightreaction.photosystem II.PSII polypeptide subunits	AT5G02120.1	one helix protein
30315447	Pavir.J01315.1	4734	2	-0.250852	0.8404	0.092	0.2017	N/A	AT4G00830.1	RNA-binding (RRM/RBD/RNP motifs) family protein
30237498	Pavir.Ib00367.1	1808	9	-0.25068	0.8405	0.0119	0.0399	signalling.calcium	AT3G13460.1	evolutionarily conserved C-terminal region 2
30247000	Pavir.J11540.1	3349	12	-0.25068	0.8405	0.0004	0.0022	amino acid metabolism.synthesis.central amino acid metabolism.GABA.gamma-hydroxybutyrate DH	AT1G17650.1	glyoxylate reductase 2
30283016	Pavir.J28281.1	5071	1	-0.250337	0.8407	0.4791	0.6417	transport.misc	AT1G61250.1	secretory carrier 3
30257296	Pavir.J01073.1	1491	3	-0.250337	0.8407	0.0578	0.1427	cell.organisation	AT4G35450.1	ankyrin repeat-containing protein 2
30188611	Pavir.Fa00471.1	4575	2	-0.250337	0.8407	0.3238	0.4926	RNA.regulation of transcription.unclassified	AT1G67325.1	Ran BP2/NZF zinc finger-like superfamily protein
30229869	Pavir.Ea03229.1	5309	1	-0.250165	0.8408	0.1541	0.2981	signalling.G-proteins	AT5G17790.1	zinc finger (Ran-binding) family protein
30236008	Pavir.Ab02600.1	3725	2	-0.250165	0.8408	0.2261	0.3878	stress.abiotic.heat	AT3G44110.1	DNAJ homologue 3
30244834	Pavir.J17043.1	3558	5	-0.249994	0.8409	0.0331	0.0923	protein.degradation.ubiquitin.E3.RING	AT1G76410.1	RING/U-box superfamily protein
30251651	Pavir.Aa00431.1	5139	1	-0.249822	0.841	0.2065	0.3634	not assigned.no ontology.SET domain-containing protein	AT1G24610.1	Rubisco methyltransferase family protein
30204539	Pavir.Ca02035.1	2610	5	-0.249822	0.841	0.0468	0.1216	PS.lightreaction.photosystem I.PSI polypeptide subunits	AT4G12800.1	photosystem I subunit l
30284951	Pavir.J24144.1	4831	1	-0.249651	0.8411	0.4785	0.6412	RNA.regulation of transcription.NIN-like bZIP-related family	AT1G74480.1	RWP-RK domain-containing protein
30208446	Pavir.J13280.1	2008	21	-0.249136	0.8414	<.0001	<.0001	misc.misc2	AT1G35420.2	alpha/beta-Hydrolases superfamily protein
30221470	Pavir.Gb01736.1	2182	6	-0.249136	0.8414	0.0328	0.0917	protein.aa activation.glycine-tRNA ligase	AT1G29880.1	glycyl-tRNA synthetase / glycine--tRNA ligase
30305310	Pavir.Ga01211.1	5119	1	-0.248965	0.8415	0.2925	0.4596	tetrapyrrole synthesis.protoporphyrin IX oxidase	AT5G14220.1	Flavin containing amine oxidoreductase family
30275243	Pavir.J09133.1	5043	2	-0.248965	0.8415	0.2248	0.3859	protein.degradation	AT4G33090.1	aminopeptidase M1
30215317	Pavir.Ia00932.1	4074	2	-0.248451	0.8418	0.1553	0.2992	N/A	AT1G55265.1	Protein of unknown function, DUF538
30270001	Pavir.Cb01956.1	439	67	-0.248279	0.8419	<.0001	<.0001	PS.lightreaction.photosystem I.PSI polypeptide subunits	AT5G64040.1	photosystem I reaction center subunit PSI-N, chloroplast, putative / PSI-N, putative (PSAN)
30293895	Pavir.Ba02980.1	1984	2	-0.248279	0.8419	0.2331	0.3959	RNA.regulation of transcription.HB Homeobox transcription factor family	AT3G18380.1	sequence-specific DNA binding transcription factors;sequence-specific DNA binding
30227492	Pavir.Ea02402.1	311	16	-0.248279	0.8419	0.037	0.1008	not assigned.no ontology	AT2G21530.1	SMAD/FHA domain-containing protein
30266879	Pavir.J21512.1	3335	5	-0.248108	0.842	0.0132	0.0435	misc.oxidases - copper flavone etc	AT4G12290.1	Copper amine oxidase family protein
30260197	Pavir.Db00958.1	3139	6	-0.248108	0.842	0.0393	0.106	PS.lightreaction.photosystem I.LHC-I	AT3G54890.4	photosystem I light harvesting complex gene 1
30216893	Pavir.J40778.1	687	10	-0.247937	0.8421	0.0251	0.0737	DNA.synthesis/chromatin structure	AT2G47450.1	chloroplast signal recognition particle component (CAO)
30206418	Pavir.Ca00654.1	4484	3	-0.247594	0.8423	0.0797	0.1814	signalling.MAP kinases	AT5G56580.1	MAP kinase kinase 6
30311023	Pavir.Eb00744.1	3666	4	-0.247423	0.8424	0.0328	0.0917	protein.targeting.chloroplast	AT2G28800.1	63 kDa inner membrane family protein
30203917	Pavir.Ca00868.1	1982	6	-0.247251	0.8425	0.0606	0.1478	development.unspecified	AT1G18080.1	Transducin/WD40 repeat-like superfamily protein
30227042	Pavir.Ea02583.1	2536	6	-0.247251	0.8425	0.0606	0.1478	development.unspecified	AT1G18080.1	Transducin/WD40 repeat-like superfamily protein
30206298	Pavir.Ca00278.1	4374	1	-0.246224	0.8431	0.1578	0.3026	cell.vesicle transport	AT3G11820.1	syntaxin of plants 121
30243477	Pavir.J03414.1	266	6	-0.246224	0.8431	0.0004	0.0022	N/A	AT4G39710.1	FK506-binding protein 16-2
30236406	Pavir.Ab00437.1	4814	3	-0.245369	0.8436	0.1251	0.2557	RNA.regulation of transcription.unclassified	AT3G21810.1	Zinc finger C-x8-C-x5-C-x3-H type family protein
30259374	Pavir.J15010.1	2117	1	-0.245198	0.8437	0.2802	0.4473	not assigned.no ontology	AT2G27285.1	Coiled-coil domain-containing protein 55 (DUF2040)
30296724	Pavir.Bb01345.1	2585	5	-0.245198	0.8437	0.0322	0.0904	minor CHO metabolism.others	AT5G66530.1	Galactose mutarotase-like superfamily protein
30188858	Pavir.J00566.1	8	52	-0.245198	0.8437	<.0001	<.0001	PS.calvin cycle.phosphoglycerate kinase	AT1G56190.1	Phosphoglycerate kinase family protein
30209519	Pavir.Ia03660.1	582	41	-0.245198	0.8437	<.0001	<.0001	N/A	AT5G02530.1	RNA-binding (RRM/RBD/RNP motifs) family protein
30304175	Pavir.Ga00323.1	1960	9	-0.245027	0.8438	0.0336	0.0934	misc.protease inhibitor/seed storage/lipid transfer protein (LTP) family protein	AT3G22142.1	Bifunctional inhibitor/lipid-transfer protein/seed storage 2S albumin superfamily protein
30197930	Pavir.J04781.1	5151	3	-0.245027	0.8438	0.0001	0.0006	cell wall.cell wall proteins.LRR	AT4G13340.1	Leucine-rich repeat (LRR) family protein
30235632	Pavir.Ab00052.1	1246	5	-0.245027	0.8438	0.0119	0.0399	N/A	AT2G45060.1	Uncharacterised conserved protein UCP022280
30206011	Pavir.Ca00590.1	3193	8	-0.244685	0.844	0.0002	0.0012	nucleotide metabolism.phosphotransfer and pyrophosphatases.uridylate kinase	AT5G26667.1	P-loop containing nucleoside triphosphate hydrolases superfamily protein
30309405	Pavir.Eb03229.1	4148	6	-0.244685	0.844	0.0952	0.2069	RNA.regulation of transcription.putative transcription regulator	AT1G29220.1	transcriptional regulator family protein
30310774	Pavir.Eb00641.1	4205	4	-0.244172	0.8443	0.1525	0.2959	not assigned.no ontology	AT4G21585.1	endonuclease 4
30306055	Pavir.Ga00481.1	3386	3	-0.243831	0.8445	0.0883	0.1958	not assigned.no ontology	AT3G23840.1	HXXXD-type acyl-transferase family protein
30303723	Pavir.Ga00544.1	757	4	-0.243831	0.8445	0.0569	0.1415	amino acid metabolism.synthesis.branched chain group.leucine specific.3-isopropylmalate dehydrogenase	AT1G80560.1	isopropylmalate dehydrogenase 2
30218402	Pavir.J02454.1	3982	2	-0.243831	0.8445	0.2058	0.3624	protein.synthesis.ribosomal protein.eukaryotic.60S subunit.L30	AT1G77940.1	Ribosomal protein L7Ae/L30e/S12e/Gadd45 family protein
30234798	Pavir.Ab01674.1	5597	1	-0.24366	0.8446	0.1049	0.2231	N/A	AT1G28510.1	Optic atrophy 3 protein (OPA3)
30225237	Pavir.J07098.1	4776	3	-0.24366	0.8446	0.0454	0.1185	C1-metabolism.glycine hydroxymethyltransferase	AT4G13930.1	serine hydroxymethyltransferase 4
30233606	Pavir.Ab00467.1	4566	2	-0.243489	0.8447	0.0033	0.0137	N/A	AT2G39440.1	N/A
30227852	Pavir.Ea00775.1	1745	4	-0.243318	0.8448	0.0045	0.0179	cell.cycle.peptidylprolyl isomerase	AT1G74070.1	Cyclophilin-like peptidyl-prolyl cis-trans isomerase family protein
30214522	Pavir.Ia03654.1	783	12	-0.243318	0.8448	<.0001	<.0001	DNA.synthesis/chromatin structure.histone.core.H2A	AT5G02560.1	histone H2A 12
30246871	Pavir.J08113.1	5242	2	-0.242465	0.8453	0.2477	0.4116	RNA.processing	AT2G03870.1	Small nuclear ribonucleoprotein family protein
30205225	Pavir.Ca00406.1	1772	7	-0.242294	0.8454	0.0176	0.055	amino acid metabolism.synthesis.glutamate family.arginine.arginosuccinate synthase	AT4G24830.1	arginosuccinate synthase family
30240495	Pavir.Ib00952.1	1538	12	-0.242123	0.8455	0.0051	0.0199	not assigned.no ontology	AT5G42770.1	Maf-like protein
30197662	Pavir.J40504.1	1	107	-0.242123	0.8455	<.0001	<.0001	PS.lightreaction.photosystem II.PSII polypeptide subunits	AT3G50820.1	photosystem II subunit O-2
30242321	Pavir.Ib01348.1	2915	7	-0.242123	0.8455	0.01	0.0346	misc.rhodanese	AT3G08920.1	Rhodanese/Cell cycle control phosphatase superfamily protein
30253231	Pavir.Aa01229.1	3810	1	-0.241953	0.8456	0.4319	0.598	RNA.regulation of transcription.putative transcription regulator	AT3G61260.1	Remorin family protein
30191930	Pavir.Da01080.1	3561	10	-0.241953	0.8456	0.0245	0.0724	RNA.regulation of transcription	AT5G17560.1	BolA-like family protein
30198166	Pavir.J03342.1	945	2	-0.241953	0.8456	0.1718	0.3198	PS.lightreaction.photosystem II.biogenesis	AT5G23120.1	photosystem II stability/assembly factor, chloroplast (HCF136)
30305090	Pavir.Ga01599.1	2262	8	-0.241782	0.8457	0.5917	0.7381	N/A	N/A	N/A
30194067	Pavir.Da00693.1	591	8	-0.241612	0.8458	0.0055	0.0212	N/A	AT1G29250.1	Alba DNA/RNA-binding protein
30305099	Pavir.Ga01827.1	440	12	-0.241612	0.8458	0.0001	0.0006	PS.lightreaction.photosystem II.PSII polypeptide subunits	AT2G28605.1	Photosystem II reaction center PsbP family protein
30214385	Pavir.Ia01046.1	4026	2	-0.240588	0.8464	0.0258	0.0755	N/A	AT1G76200.1	N/A
30291945	Pavir.Ba00418.1	5389	1	-0.240248	0.8466	0.39	0.5579	RNA.transcription	AT3G16980.1	RNA polymerases M/15 Kd subunit
30304890	Pavir.Ga02242.1	2218	7	-0.240248	0.8466	0.0011	0.0054	protein.postranslational modification	AT5G58140.4	phototropin 2
30190438	Pavir.J10058.1	801	17	-0.240248	0.8466	0.0005	0.0027	N/A	AT1G62780.1	N/A
30213222	Pavir.Ia02671.1	5003	1	-0.239566	0.847	0.3375	0.5068	cell.organisation	AT4G19150.1	Ankyrin repeat family protein
30280115	Pavir.Fb00040.1	1575	21	-0.239566	0.847	0.1892	0.3427	PS.lightreaction.other electron carrier (ox/red).ferredoxin	AT1G60950.1	2Fe-2S ferredoxin-like superfamily protein
30240463	Pavir.Ib03479.1	5140	2	-0.239566	0.847	0.1228	0.2518	N/A	AT5G64850.1	N/A
30206960	Pavir.Ca01467.1	2287	8	-0.239226	0.8472	0.0008	0.0041	N/A	AT2G47010.1	N/A
30236108	Pavir.Ab02808.1	76	29	-0.239055	0.8473	0.0001	0.0006	PS.calvin cycle.PRK	AT1G32060.1	phosphoribulokinase
30253939	Pavir.Aa01206.1	1450	1	-0.238885	0.8474	0.0588	0.1446	protein.degradation.metalloprotease	AT3G47060.1	FTSH protease 7
30216885	Pavir.J07967.1	1231	18	-0.238545	0.8476	<.0001	<.0001	N/A	AT1G18730.1	NDH dependent flow 6
30212037	Pavir.Ia03213.1	190	22	-0.238545	0.8476	0.001	0.0049	RNA.regulation of transcription.CCAAT box binding factor family HAP3	AT4G14540.1	nuclear factor Y, subunit B3
30220221	Pavir.J00504.1	717	34	-0.238374	0.8477	<.0001	<.0001	major CHO metabolism.degradation.sucrose.hexokinase	AT4G29130.1	hexokinase 1
30187020	Pavir.Fa00987.1	34	98	-0.238204	0.8478	<.0001	<.0001	RNA.transcription	AT3G46780.1	plastid transcriptionally active 16
30245215	Pavir.J26133.1	2361	5	-0.237864	0.848	0.0413	0.1101	protein.degradation.cysteine protease	AT1G09850.1	xylem bark cysteine peptidase 3
30268844	Pavir.Cb00099.1	5617	1	-0.237524	0.8482	0.1572	0.3019	stress.biotic.PR-proteins	AT3G50950.1	HOPZ-ACTIVATED RESISTANCE 1
30276593	Pavir.J32967.1	5488	1	-0.237524	0.8482	0.2512	0.4157	N/A	AT5G39410.1	Saccharopine dehydrogenase
30238907	Pavir.Ib00218.1	4771	3	-0.237354	0.8483	0.0744	0.1716	protein.synthesis.ribosomal protein.eukaryotic.60S subunit.L21	AT1G57660.1	Translation protein SH3-like family protein
30213251	Pavir.Ia00849.1	4481	2	-0.237183	0.8484	0.187	0.3398	cell.organisation	AT1G13330.1	Arabidopsis Hop2 homolog
30236684	Pavir.J02008.1	3599	3	-0.237183	0.8484	0.1208	0.2486	RNA.regulation of transcription.PWWP domain protein	AT5G02950.1	Tudor/PWWP/MBT superfamily protein
30206721	Pavir.Ca00967.1	4121	1	-0.236843	0.8486	0.0726	0.1686	N/A	AT5G52960.1	N/A
30217699	Pavir.J20454.1	5173	1	-0.236843	0.8486	0.1863	0.3391	secondary metabolism.isoprenoids.carotenoids.carotenoid cleavage dioxygenase	AT3G63520.1	carotenoid cleavage dioxygenase 1
30219812	Pavir.J13115.1	2823	7	-0.236673	0.8487	0.1421	0.2804	protein.synthesis.ribosomal protein.eukaryotic.40S subunit.S26	AT3G56340.1	Ribosomal protein S26e family protein
30285817	Pavir.J00765.1	1865	19	-0.236673	0.8487	<.0001	<.0001	RNA.processing.splicing	AT2G47580.1	spliceosomal protein U1A
30282790	Pavir.J22260.1	4862	2	-0.236333	0.8489	0.317	0.4854	protein.degradation	AT3G05350.1	Metallopeptidase M24 family protein
30228644	Pavir.Ea02442.1	5444	1	-0.236164	0.849	0.349	0.5176	secondary metabolism.isoprenoids.mevalonate pathway.farnesyl pyrophosphate synthetase	AT5G47770.1	farnesyl diphosphate synthase 1
30292957	Pavir.Ba00043.1	4327	2	-0.235824	0.8492	0.1094	0.2302	nucleotide metabolism.phosphotransfer and pyrophosphatases.thymidylate kinase	AT5G59440.3	P-loop containing nucleoside triphosphate hydrolases superfamily protein
30282137	Pavir.J33510.1	5086	1	-0.235484	0.8494	0.2895	0.4567	protein.postranslational modification	AT1G69220.2	Protein kinase superfamily protein
30278011	Pavir.Fb01956.1	1834	6	-0.235484	0.8494	0.0031	0.013	RNA.regulation of transcription.C2H2 zinc finger family	AT2G27100.1	C2H2 zinc-finger protein SERRATE (SE)
30236318	Pavir.Ab02375.1	628	3	-0.235484	0.8494	0.165	0.3123	protein.degradation	AT1G16470.1	proteasome subunit PAB1
30199081	Pavir.J15539.1	1097	12	-0.235314	0.8495	0.0003	0.0017	N/A	AT3G59780.1	Rhodanese/Cell cycle control phosphatase superfamily protein
30310977	Pavir.Eb03215.1	4308	2	-0.235314	0.8495	0.0959	0.2081	N/A	AT4G21470.1	riboflavin kinase/FMN hydrolase
30260770	Pavir.Db00955.1	2897	8	-0.235314	0.8495	0.0043	0.0173	N/A	AT5G42850.1	Thioredoxin superfamily protein
30268502	Pavir.Cb00601.1	4339	1	-0.235144	0.8496	0.284	0.4517	N/A	AT3G17900.1	N/A
30252519	Pavir.Aa02612.1	1072	5	-0.235144	0.8496	0.001	0.0049	amino acid metabolism.synthesis.aspartate family.lysine.dihydrodipicolinate reductase	AT3G59890.1	Dihydrodipicolinate reductase, bacterial/plant
30316650	Pavir.Ha00831.1	3654	5	-0.235144	0.8496	0.0021	0.0094	lipid metabolism.FA synthesis and FA elongation.long chain fatty acid CoA ligase	AT1G77590.1	long chain acyl-CoA synthetase 9
30254398	Pavir.J00136.1	1702	13	-0.234975	0.8497	0.0016	0.0074	stress.abiotic.heat	AT5G04890.1	HSP20-like chaperones superfamily protein
30224772	Pavir.Gb01624.1	2017	3	-0.234805	0.8498	0.2235	0.3841	not assigned.no ontology	AT2G27285.1	Coiled-coil domain-containing protein 55 (DUF2040)
30236031	Pavir.Ab03334.1	2796	6	-0.234805	0.8498	0.0028	0.0119	protein.degradation	AT5G65620.1	Zincin-like metalloproteases family protein
30315092	Pavir.J20077.1	447	21	-0.234465	0.85	<.0001	<.0001	signalling.phosphinositides	AT4G20260.4	plasma-membrane associated cation-binding protein 1
30275947	Pavir.J03829.1	2495	8	-0.234126	0.8502	0.0614	0.1494	RNA.regulation of transcription.unclassified	AT1G13920.1	Remorin family protein
30278086	Pavir.Fb01031.1	2040	1	-0.233956	0.8503	0.2935	0.4605	minor CHO metabolism.others	AT5G57330.1	Galactose mutarotase-like superfamily protein
30251009	Pavir.Aa01132.1	3665	4	-0.233786	0.8504	0.0552	0.1381	not assigned.no ontology	AT4G31040.1	CemA-like proton extrusion protein-related
30239390	Pavir.Ib00918.1	4523	1	-0.233617	0.8505	0.1129	0.2358	mitochondrial electron transport / ATP synthesis.cytochrome c oxidase	AT1G69750.1	cytochrome c oxidase 19-2
30191590	Pavir.Da01269.1	3492	5	-0.233617	0.8505	0.0028	0.0119	development.unspecified	AT1G70670.1	Caleosin-related family protein
30296389	Pavir.J24273.1	5205	2	-0.233617	0.8505	0.6751	0.7957	N/A	AT2G44525.1	Protein of unknown function (DUF498/DUF598)
30226954	Pavir.Ea00976.1	1446	11	-0.233447	0.8506	<.0001	<.0001	stress.abiotic.unspecified	AT1G09560.1	germin-like protein 5
30224154	Pavir.Gb02365.1	1079	14	-0.233278	0.8507	<.0001	<.0001	protein.postranslational modification	AT5G58140.4	phototropin 2
30315542	Pavir.J25571.1	5164	1	-0.232939	0.8509	0.677	0.797	N/A	AT1G02160.1	Cox19 family protein (CHCH motif)
30250285	Pavir.Aa03469.1	352	13	-0.232939	0.8509	0.0125	0.0416	N/A	AT3G13470.1	TCP-1/cpn60 chaperonin family protein
30294440	Pavir.J00062.1	2027	11	-0.232769	0.851	0.0285	0.0819	N-metabolism.N-degradation.glutamate dehydrogenase	AT5G18170.1	glutamate dehydrogenase 1
30223025	Pavir.Gb00792.1	2919	1	-0.23243	0.8512	0.3773	0.5453	not assigned.no ontology.epsin N-terminal homology (ENTH) domain-containing protein	AT5G11710.1	ENTH/VHS family protein
30249808	Pavir.Aa01018.1	69	38	-0.23243	0.8512	<.0001	<.0001	PS.calvin cycle.PRK	AT1G32060.1	phosphoribulokinase
30254712	Pavir.J24422.1	947	23	-0.23243	0.8512	0.0002	0.0012	N/A	N/A	N/A
30316112	Pavir.Ha01737.1	1331	29	-0.231922	0.8515	<.0001	<.0001	RNA.regulation of transcription.putative transcription regulator	AT1G76010.1	Alba DNA/RNA-binding protein
30249898	Pavir.Aa03387.1	4239	1	-0.231752	0.8516	0.3664	0.5343	minor CHO metabolism.myo-inositol.inositol phosphatase	AT1G31190.1	myo-inositol monophosphatase like 1
30235136	Pavir.Ab03101.1	5434	2	-0.231583	0.8517	0.2618	0.4268	not assigned.no ontology.pentatricopeptide (PPR) repeat-containing protein	AT1G71060.1	Tetratricopeptide repeat (TPR)-like superfamily protein
30284307	Pavir.J18717.1	2192	6	-0.231413	0.8518	0.0164	0.0517	N/A	N/A	N/A
30215553	Pavir.Ia01553.1	46	63	-0.230736	0.8522	<.0001	<.0001	TCA / org transformation.other organic acid transformatons.malic	AT4G00570.1	NAD-dependent malic enzyme 2
30236648	Pavir.Ab00130.1	3846	5	-0.230736	0.8522	0.1321	0.2667	N/A	AT4G17960.1	N/A
30198620	Pavir.J23958.1	1822	2	-0.230228	0.8525	0.3905	0.5583	signalling.G-proteins	AT3G63130.1	RAN GTPase activating protein 1
30261712	Pavir.Db00824.1	5500	1	-0.230059	0.8526	0.292	0.4589	RNA.regulation of transcription.AT-rich interaction domain containing transcription factor family	AT2G17410.1	ARID/BRIGHT DNA-binding domain-containing protein
30315478	Pavir.J22916.1	2013	6	-0.230059	0.8526	0.0098	0.0341	RNA.regulation of transcription.HB Homeobox transcription factor family	AT2G23760.1	BEL1-like homeodomain 4
30266118	Pavir.Hb00822.1	2562	5	-0.22989	0.8527	<.0001	<.0001	stress.biotic.respiratory burst	AT5G47910.1	respiratory burst oxidase homologue D
30208476	Pavir.J31286.1	1769	13	-0.22989	0.8527	0.0004	0.0022	DNA.synthesis/chromatin structure.histone.H1	AT1G06760.1	winged-helix DNA-binding transcription factor family protein
30317428	Pavir.Ha01042.1	5176	2	-0.229721	0.8528	0.0365	0.0999	protein.degradation.serine protease	AT5G27660.1	Trypsin family protein with PDZ domain
30241624	Pavir.Ib01822.1	1637	11	-0.229551	0.8529	0.0008	0.0041	RNA.regulation of transcription.putative transcription regulator	AT4G39680.1	SAP domain-containing protein
30291214	Pavir.Ba02513.1	1298	3	-0.229551	0.8529	0.0295	0.0844	N/A	N/A	N/A
30313538	Pavir.Eb02804.1	5023	1	-0.229382	0.853	0.2012	0.3572	protein.synthesis.ribosomal protein.eukaryotic.60S subunit.L28	AT2G19730.1	Ribosomal L28e protein family
30294449	Pavir.J20023.1	270	14	-0.229044	0.8532	0.0109	0.0372	not assigned.no ontology	AT2G21530.1	SMAD/FHA domain-containing protein
30264193	Pavir.Hb00060.1	3592	1	-0.228537	0.8535	0.5573	0.708	TCA / org transformation.other organic acid transformatons.atp-citrate lyase	AT1G09430.1	ATP-citrate lyase A-3
30297165	Pavir.Bb03400.1	2656	3	-0.228537	0.8535	0.2403	0.4039	signalling.G-proteins	AT4G39520.1	GTP-binding protein-related
30206984	Pavir.Ca00776.1	1606	2	-0.228537	0.8535	0.422	0.5883	misc.peroxidases	AT4G33420.1	Peroxidase superfamily protein
30235488	Pavir.Ab01240.1	4261	1	-0.228368	0.8536	0.0937	0.2046	protein.postranslational modification	AT5G53140.1	Protein phosphatase 2C family protein
30248358	Pavir.J19276.1	1159	19	-0.228368	0.8536	<.0001	<.0001	not assigned.no ontology	AT5G04990.1	SAD1/UNC-84 domain protein 1
30274331	Pavir.J26780.1	4637	2	-0.22803	0.8538	0.2584	0.4228	protein.aa activation.valine-tRNA ligase	AT1G14610.1	valyl-tRNA synthetase / valine--tRNA ligase (VALRS)
30223962	Pavir.Gb01394.1	737	41	-0.227692	0.854	<.0001	<.0001	PS.photorespiration.phosphoglycolate phosphatase	AT5G36700.1	2-phosphoglycolate phosphatase 1
30308756	Pavir.Eb00788.1	528	34	-0.227523	0.8541	<.0001	<.0001	stress.abiotic.unspecified	AT1G09560.1	germin-like protein 5
30217873	Pavir.J02571.1	2882	9	-0.227523	0.8541	0.0063	0.0237	nucleotide metabolism.salvage.NUDIX hydrolases	AT3G12600.1	nudix hydrolase homolog 16
30260797	Pavir.Db02020.1	2905	5	-0.227523	0.8541	0.0866	0.193	N/A	AT4G01150.1	N/A
30259827	Pavir.J37141.1	1015	7	-0.227354	0.8542	0.0352	0.0969	stress.abiotic.cold	AT1G05260.1	Peroxidase superfamily protein
30203253	Pavir.Ca01313.1	2029	10	-0.227354	0.8542	0.0113	0.0383	S-assimilation.sulfite redox	AT5G04590.1	sulfite reductase
30192185	Pavir.Da01617.1	3104	5	-0.227016	0.8544	0.004	0.0162	protein.degradation	AT3G57680.1	Peptidase S41 family protein
30223861	Pavir.Gb01492.1	3753	2	-0.227016	0.8544	0.4133	0.5791	N/A	AT5G08170.1	porphyromonas-type peptidyl-arginine deiminase family protein
30269649	Pavir.Cb00389.1	4101	5	-0.226848	0.8545	0.0205	0.0622	N/A	AT1G56420.1	N/A
30222793	Pavir.Gb00164.1	3171	4	-0.226679	0.8546	0.1933	0.3476	cell wall.cell wall proteins.RGP	AT5G16510.1	Alpha-1,4-glucan-protein synthase family protein
30246960	Pavir.J01932.1	502	2	-0.22651	0.8547	0.1608	0.3066	protein.degradation.ubiquitin.proteasom	AT3G05530.1	regulatory particle triple-A ATPase 5A
30204744	Pavir.Ca01240.1	3362	7	-0.22651	0.8547	0.0018	0.0082	RNA.regulation of transcription.Chromatin Remodeling Factors	AT3G17590.1	transcription regulatory protein SNF5, putative (BSH)
30238294	Pavir.Ib03580.1	4567	2	-0.226341	0.8548	0.2314	0.3945	N/A	AT5G15270.1	RNA-binding KH domain-containing protein
30243646	Pavir.J26938.1	1787	2	-0.226341	0.8548	0.5233	0.6794	not assigned.no ontology	AT4G39470.1	Tetratricopeptide repeat (TPR)-like superfamily protein
30198132	Pavir.J15705.1	1337	4	-0.226172	0.8549	0.5026	0.6611	nucleotide metabolism.phosphotransfer and pyrophosphatases.nucleoside diphosphate kinase	AT4G23900.1	Nucleoside diphosphate kinase family protein
30199377	Pavir.J23887.1	1462	6	-0.226172	0.8549	0.1691	0.3167	cell.organisation	AT2G35490.1	Plastid-lipid associated protein PAP / fibrillin family protein
30290556	Pavir.Ba03581.1	3046	6	-0.226004	0.855	0.0103	0.0355	not assigned.no ontology	AT4G36400.1	FAD-linked oxidases family protein
30256395	Pavir.J37980.1	3576	7	-0.226004	0.855	0.0087	0.0309	RNA.regulation of transcription.Histone acetyltransferases	AT4G37280.1	MRG family protein
30231446	Pavir.Ea02478.1	3142	7	-0.225835	0.8551	0.0197	0.0602	amino acid metabolism.degradation.aspartate family.methionine	AT1G66520.1	formyltransferase, putative
30290880	Pavir.Ba00708.1	1370	19	-0.225498	0.8553	0.0006	0.0032	transport.p- and v-ATPases.H+-transporting two-sector ATPase.subunit H	AT3G42050.1	vacuolar ATP synthase subunit H family protein
30264949	Pavir.Hb00014.1	47	23	-0.224654	0.8558	0.0005	0.0027	PS.calvin cycle.rubisco interacting	AT2G39730.2	rubisco activase
30215641	Pavir.Ia03745.1	4274	2	-0.224317	0.856	0.138	0.2754	RNA.processing.splicing	AT5G18810.1	SC35-like splicing factor 28
30191837	Pavir.Da02164.1	2246	4	-0.224149	0.8561	0.1758	0.3255	DNA.repair	AT1G30480.1	D111/G-patch domain-containing protein
30232232	Pavir.Ab01313.1	4259	1	-0.223643	0.8564	0.7163	0.8233	lipid metabolism.FA synthesis and FA elongation.acyl coa ligase	AT5G36880.2	acetyl-CoA synthetase
30310305	Pavir.Eb03500.1	5310	1	-0.223475	0.8565	0.3289	0.498	RNA.transcription	AT3G22320.1	Eukaryotic rpb5 RNA polymerase subunit family protein
30316917	Pavir.Ha00314.1	4464	3	-0.223306	0.8566	0.0551	0.1381	misc.beta 1 3 glucan hydrolases.glucan endo-1 3-beta-glucosidase	AT3G46570.1	Glycosyl hydrolase superfamily protein
30236843	Pavir.Ib00447.1	3066	6	-0.223306	0.8566	0.0095	0.0333	DNA.synthesis/chromatin structure	AT3G47490.1	HNH endonuclease
30245253	Pavir.J15310.1	5607	1	-0.223138	0.8567	0.2794	0.4468	protein.postranslational modification	AT5G04510.2	3\'-phosphoinositide-dependent protein kinase 1
30201385	Pavir.J38332.1	3241	5	-0.223138	0.8567	0.0231	0.0688	not assigned.no ontology	AT3G45740.1	hydrolase family protein / HAD-superfamily protein
30254206	Pavir.J02576.1	4938	2	-0.223138	0.8567	0.2971	0.464	RNA.transcription	AT4G24440.1	transcription initiation factor IIA gamma chain / TFIIA-gamma (TFIIA-S)
30288352	Pavir.J24769.1	3874	1	-0.22297	0.8568	0.3476	0.5159	C1-metabolism.Methylenetetrahydrofolate dehydrogenase & Methenyltetrahydrofolate cyclohydrolase	AT4G00620.1	Amino acid dehydrogenase family protein
30284617	Pavir.J02066.1	2538	3	-0.22297	0.8568	0.1814	0.332	DNA.synthesis/chromatin structure	AT5G11170.1	DEAD/DEAH box RNA helicase family protein
30285869	Pavir.J10550.1	4696	3	-0.222801	0.8569	0.0178	0.0555	protein.synthesis.ribosomal protein.eukaryotic.60S subunit.L19	AT3G16780.1	Ribosomal protein L19e family protein
30306182	Pavir.J02478.1	3062	6	-0.222633	0.857	0.0038	0.0155	amino acid metabolism.synthesis.central amino acid metabolism.aspartate.aspartate aminotransferase	AT2G22250.2	aspartate aminotransferase
30280575	Pavir.Fb02172.1	4004	1	-0.222296	0.8572	0.4702	0.633	protein.degradation	AT1G63770.3	Peptidase M1 family protein
30221462	Pavir.Gb02404.1	5458	1	-0.22196	0.8574	0.433	0.599	signalling.receptor kinases.legume-lectin	AT5G10530.1	Concanavalin A-like lectin protein kinase family protein
30294664	Pavir.J06387.1	5311	1	-0.221791	0.8575	0.46	0.6247	signalling.light	AT5G65540.1	N/A
30284164	Pavir.J00842.1	2009	7	-0.221791	0.8575	0.0074	0.027	not assigned.no ontology	AT4G34480.1	O-Glycosyl hydrolases family 17 protein
30239936	Pavir.Ib01289.1	100	74	-0.221623	0.8576	<.0001	<.0001	PS.lightreaction.ATP synthase.subunit B_ (ATPX)	AT4G32260.1	ATPase, F0 complex, subunit B/B\', bacterial/chloroplast
30299893	Pavir.Bb02908.1	5019	1	-0.221119	0.8579	0.3984	0.5662	N/A	AT1G61667.1	Protein of unknown function, DUF538
30185234	Pavir.J10034.1	2206	8	-0.22095	0.858	0.0336	0.0934	N/A	AT5G61030.1	glycine-rich RNA-binding protein 3
30274976	Pavir.J30430.1	4863	4	-0.220782	0.8581	0.2912	0.4585	N/A	AT4G01037.1	Ubiquitin carboxyl-terminal hydrolase family protein
30310192	Pavir.Eb00745.1	3036	2	-0.220446	0.8583	0.2443	0.408	redox.ascorbate and glutathione.glutathione	AT4G29210.1	gamma-glutamyl transpeptidase 4
30289343	Pavir.Ba00725.1	552	11	-0.220278	0.8584	<.0001	<.0001	DNA.synthesis/chromatin structure.histone.core.H2A	AT4G27230.1	histone H2A 2
30318173	Pavir.Ha00962.1	598	1	-0.219942	0.8586	0.515	0.6721	misc. other Ferredoxins and Rieske domain	AT1G71500.1	Rieske (2Fe-2S) domain-containing protein
30206511	Pavir.Ca01881.1	4489	3	-0.219942	0.8586	0.2038	0.3597	amino acid metabolism.synthesis.serine-glycine-cysteine group.cysteine.SAT	AT5G56760.1	serine acetyltransferase 1;1
30235951	Pavir.Ab03105.1	4462	3	-0.219774	0.8587	0.166	0.3132	stress.abiotic.heat	AT4G16660.1	heat shock protein 70 (Hsp 70) family protein
30231539	Pavir.Ea03598.1	599	10	-0.219606	0.8588	0.0039	0.0158	secondary metabolism.isoprenoids.non-mevalonate pathway.CMS	AT2G02500.1	Nucleotide-diphospho-sugar transferases superfamily protein
30300500	Pavir.Bb03115.1	4936	2	-0.21927	0.859	0.314	0.4826	RNA.regulation of transcription.putative transcription regulator	AT2G41870.1	Remorin family protein
30269771	Pavir.Cb00879.1	2437	11	-0.21927	0.859	0.0014	0.0066	N/A	AT4G15790.1	N/A
30240922	Pavir.Ib03533.1	2991	3	-0.219102	0.8591	0.0668	0.1593	not assigned.no ontology	AT1G17330.1	Metal-dependent phosphohydrolase
30205157	Pavir.Ca00108.1	4036	3	-0.218934	0.8592	0.0782	0.1787	glycolysis.cytosolic branch.pyruvate kinase (PK)	AT3G52990.1	Pyruvate kinase family protein
30299043	Pavir.Bb03092.1	4337	2	-0.218766	0.8593	0.2561	0.4206	not assigned.no ontology	AT1G11090.1	alpha/beta-Hydrolases superfamily protein
30237415	Pavir.Ib02524.1	4022	3	-0.218766	0.8593	0.1394	0.277	DNA.repair	AT1G01490.1	Heavy metal transport/detoxification superfamily protein
30293342	Pavir.Ba00128.1	2679	14	-0.218598	0.8594	0.0009	0.0045	major CHO metabolism.degradation.starch.D enzyme	AT2G40840.1	disproportionating enzyme 2
30190223	Pavir.J03914.1	2124	23	-0.218598	0.8594	0.0002	0.0012	tetrapyrrole synthesis.magnesium protoporphyrin IX methyltransferase	AT4G25080.1	magnesium-protoporphyrin IX methyltransferase
30303347	Pavir.Ga01926.1	1326	15	-0.218598	0.8594	0.0139	0.0453	major CHO metabolism.synthesis.starch.starch branching	AT5G03650.1	starch branching enzyme 2.2
30272025	Pavir.J13575.1	5128	1	-0.21843	0.8595	0.434	0.6	not assigned.no ontology.pentatricopeptide (PPR) repeat-containing protein	AT1G04590.1	N/A
30213740	Pavir.Ia01238.1	2508	8	-0.218095	0.8597	0.0733	0.1696	development.unspecified	AT1G08780.1	ABI3-interacting protein 3
30192252	Pavir.Da00491.1	3683	6	-0.218095	0.8597	0.0831	0.1871	protein.degradation	AT5G42390.1	Insulinase (Peptidase family M16) family protein
30240765	Pavir.Ib01126.1	1238	19	-0.218095	0.8597	0.0117	0.0393	protein.synthesis.ribosomal protein.prokaryotic.chloroplast.50S subunit.L4	AT1G07320.1	ribosomal protein L4
30248886	Pavir.J20382.1	1817	7	-0.218095	0.8597	0.0192	0.059	protein.synthesis.ribosomal protein.eukaryotic.40S subunit.S16	AT2G09990.1	Ribosomal protein S5 domain 2-like superfamily protein
30210701	Pavir.Ia00209.1	3500	7	-0.217759	0.8599	0.3612	0.5288	OPP.electron transfer	AT2G27510.1	ferredoxin 3
30300552	Pavir.Bb02933.1	2368	14	-0.217759	0.8599	0.0002	0.0012	misc.beta 1 3 glucan hydrolases	AT5G55180.1	O-Glycosyl hydrolases family 17 protein
30270987	Pavir.J04642.1	5208	1	-0.217256	0.8602	0.3574	0.5252	lipid metabolism.lipid degradation.lysophospholipases.carboxylesterase	AT5G20060.1	alpha/beta-Hydrolases superfamily protein
30284262	Pavir.J29410.1	2197	8	-0.217256	0.8602	0.0038	0.0155	protein.aa activation.bifunctional aminoacyl-tRNA synthetase	AT5G52520.1	Class II aaRS and biotin synthetases superfamily protein
30302767	Pavir.Ga01733.1	3007	5	-0.217088	0.8603	0.0047	0.0186	N/A	AT4G10000.1	Thioredoxin family protein
30251876	Pavir.Aa01736.1	2851	4	-0.216921	0.8604	0.0404	0.1083	N/A	N/A	N/A
30283279	Pavir.J03876.1	5187	1	-0.216753	0.8605	0.3385	0.5078	lipid metabolism.lipid degradation.lysophospholipases.carboxylesterase	AT5G20060.1	alpha/beta-Hydrolases superfamily protein
30243009	Pavir.Ib00962.1	2506	6	-0.216418	0.8607	0.0342	0.0949	not assigned.no ontology	AT4G34480.1	O-Glycosyl hydrolases family 17 protein
30312205	Pavir.Eb02624.1	1255	15	-0.216418	0.8607	0.0001	0.0006	N/A	AT4G29590.1	S-adenosyl-L-methionine-dependent methyltransferases superfamily protein
30312072	Pavir.Eb03592.1	5580	2	-0.216418	0.8607	0.0438	0.1152	hormone metabolism.auxin.signal transduction	AT5G07120.1	sorting nexin 2B
30272775	Pavir.J41024.1	1297	1	-0.21625	0.8608	0.3209	0.4894	mitochondrial electron transport / ATP synthesis.cytochrome c reductase	AT5G25450.1	Cytochrome bd ubiquinol oxidase, 14kDa subunit
30244118	Pavir.J34940.1	1729	10	-0.21625	0.8608	0.0646	0.1554	misc.glutathione S transferases	AT3G55040.1	glutathione transferase lambda 2
30194880	Pavir.J35577.1	2026	1	-0.216082	0.8609	0.5912	0.7379	secondary metabolism.phenylpropanoids.lignin biosynthesis.COMT	AT5G54160.1	O-methyltransferase 1
30234504	Pavir.Ab00037.1	3292	5	-0.216082	0.8609	0.101	0.2165	misc.cytochrome P450	AT4G15440.1	hydroperoxide lyase 1
30301820	Pavir.J39962.1	2548	2	-0.216082	0.8609	0.1532	0.2968	transport.p- and v-ATPases	AT1G78900.1	vacuolar ATP synthase subunit A
30280423	Pavir.Fb00666.1	3617	4	-0.215915	0.861	0.108	0.2286	transport.metabolite transporters at the envelope membrane	AT5G33320.1	Glucose-6-phosphate/phosphate translocator-related
30188238	Pavir.Fa00450.1	3734	6	-0.215915	0.861	0.0006	0.0032	N/A	AT2G33585.1	N/A
30296237	Pavir.J24466.1	2235	8	-0.215747	0.8611	0.0009	0.0045	misc.beta 1 3 glucan hydrolases	AT5G55180.2	O-Glycosyl hydrolases family 17 protein
30219748	Pavir.J01725.1	2045	1	-0.21558	0.8612	0.2914	0.4585	protein.synthesis.ribosomal protein.eukaryotic.40S subunit.S2	AT3G57490.1	Ribosomal protein S5 family protein
30299065	Pavir.Bb03118.1	5408	1	-0.215245	0.8614	0.5693	0.7185	N/A	AT5G19855.1	Chaperonin-like RbcX protein
30259153	Pavir.J37766.1	3239	2	-0.21491	0.8616	0.171	0.3191	protein.degradation.serine protease	AT2G47940.1	DEGP protease 2
30200922	Pavir.J39022.1	794	35	-0.214742	0.8617	<.0001	<.0001	protein.synthesis.ribosomal protein.eukaryotic.60S subunit.L9	AT1G33140.1	Ribosomal protein L6 family
30232246	Pavir.Ab02022.1	178	91	-0.214408	0.8619	<.0001	<.0001	PS.lightreaction.photosystem II.PSII polypeptide subunits	AT1G14150.1	PsbQ-like 2
30297321	Pavir.Bb03425.1	673	15	-0.21424	0.862	0.0022	0.0098	RNA.regulation of transcription.unclassified	AT3G53460.1	chloroplast RNA-binding protein 29
30190018	Pavir.J20606.1	1429	11	-0.21424	0.862	0.04	0.1074	not assigned.no ontology	AT5G52970.1	thylakoid lumen 15.0 kDa protein
30304584	Pavir.Ga00421.1	294	3	-0.214073	0.8621	0.088	0.1957	PS.photorespiration.glycine cleavage.T subunit	AT1G11860.1	Glycine cleavage T-protein family
30270805	Pavir.J02063.1	1573	4	-0.213404	0.8625	0.0775	0.1773	signalling.calcium	AT3G59820.1	LETM1-like protein
30199084	Pavir.J08773.1	2254	9	-0.213404	0.8625	0.0003	0.0017	PS.calvin cycle.rubisco interacting	AT1G14030.1	Rubisco methyltransferase family protein
30251760	Pavir.Aa03565.1	110	15	-0.213236	0.8626	<.0001	<.0001	PS.lightreaction.other electron carrier (ox/red).ferredoxin reductase	AT5G66190.1	ferredoxin-NADP(+)-oxidoreductase 1
30215947	Pavir.Ia04783.1	1888	15	-0.213069	0.8627	0.0003	0.0017	N/A	AT2G32500.1	Stress responsive alpha-beta barrel domain protein
30291842	Pavir.Ba01662.1	3215	2	-0.2124	0.8631	0.0831	0.1871	RNA.regulation of transcription.C2H2 zinc finger family	AT1G30970.1	zinc finger (C2H2 type) family protein
30241799	Pavir.Ib00958.1	4562	3	-0.212233	0.8632	0.0546	0.1371	N/A	AT1G12530.1	N/A
30185527	Pavir.Fa02360.1	5082	1	-0.212066	0.8633	0.4607	0.6253	N/A	AT1G64680.1	N/A
30281157	Pavir.Fb02404.1	358	1	-0.212066	0.8633	0.4955	0.6562	not assigned.no ontology.proline rich family	AT1G21320.1	nucleotide binding;nucleic acid binding
30291410	Pavir.Ba01078.1	4752	2	-0.212066	0.8633	0.0076	0.0276	protein.aa activation.threonine-tRNA ligase	AT2G04842.1	threonyl-tRNA synthetase, putative / threonine--tRNA ligase, putative
30305030	Pavir.Ga02060.1	2908	8	-0.212066	0.8633	0.0554	0.1384	N/A	N/A	N/A
30240647	Pavir.Ib02288.1	4971	2	-0.211565	0.8636	0.3107	0.4789	signalling.receptor kinases	AT4G35470.1	plant intracellular ras group-related LRR 4
30212391	Pavir.Ia00394.1	1355	11	-0.211231	0.8638	0.0126	0.0418	cell wall.precursor synthesis.UDP-Glc dehydrogenase (UGD)	AT3G29360.1	UDP-glucose 6-dehydrogenase family protein
30240757	Pavir.Ib01839.1	3018	4	-0.211064	0.8639	0.1649	0.3123	N/A	AT4G39860.1	N/A
30257540	Pavir.J08895.1	1671	18	-0.210396	0.8643	0.0003	0.0017	misc.oxidases - copper flavone etc	AT3G03080.1	Zinc-binding dehydrogenase family protein
30187706	Pavir.Fa00221.1	334	3	-0.210229	0.8644	0.2293	0.3919	not assigned.no ontology.proline rich family	AT1G21320.1	nucleotide binding;nucleic acid binding
30236778	Pavir.Ib01104.1	2537	3	-0.210229	0.8644	0.073	0.1691	N/A	AT1G11400.1	partner of Y14-MAGO
30288570	Pavir.Ba01722.1	4388	3	-0.210229	0.8644	0.2704	0.4367	N/A	AT3G57785.1	N/A
30285345	Pavir.J03165.1	1796	2	-0.210062	0.8645	0.317	0.4854	stress.abiotic.heat	AT1G80030.1	Molecular chaperone Hsp40/DnaJ family protein
30265734	Pavir.Hb00026.1	117	52	-0.209895	0.8646	<.0001	<.0001	N/A	AT5G01410.1	Aldolase-type TIM barrel family protein
30217483	Pavir.J01355.1	5528	1	-0.209728	0.8647	0.2426	0.4063	not assigned.no ontology	AT4G21110.1	G10 family protein
30308068	Pavir.J08680.1	3667	5	-0.209728	0.8647	0.0201	0.0612	protein.degradation	AT5G36210.1	alpha/beta-Hydrolases superfamily protein
30227681	Pavir.Ea01586.1	1186	15	-0.209395	0.8649	<.0001	<.0001	N/A	AT1G74730.1	Protein of unknown function (DUF1118)
30318584	Pavir.Ha01485.1	1249	4	-0.209228	0.865	0.0308	0.0873	tetrapyrrole synthesis.glu-tRNA synthetase	AT1G48520.1	GLU-ADT subunit B
30191604	Pavir.Da00229.1	2998	10	-0.209228	0.865	0.01	0.0346	PS.calvin cycle.FBPase	AT5G64380.1	Inositol monophosphatase family protein
30257797	Pavir.J02023.1	28	1	-0.209061	0.8651	0.7735	0.8625	PS.calvin cycle.aldolase	AT4G38970.1	fructose-bisphosphate aldolase 2
30185249	Pavir.J29109.1	173	2	-0.208894	0.8652	0.131	0.2655	N/A	AT3G13470.1	TCP-1/cpn60 chaperonin family protein
30290001	Pavir.Ba01079.1	4763	1	-0.208728	0.8653	0.3447	0.5131	not assigned.no ontology	AT1G59600.1	ZCW7
30231345	Pavir.Ea00897.1	5117	1	-0.208561	0.8654	0.0724	0.1682	RNA.regulation of transcription.Zn-finger(CCHC)	AT3G62330.1	Zinc knuckle (CCHC-type) family protein
30236773	Pavir.Ib00714.1	3732	3	-0.208394	0.8655	0.209	0.3662	protein.aa activation.methionine-tRNA ligase	AT3G55400.1	methionyl-tRNA synthetase / methionine--tRNA ligase / MetRS (cpMetRS)
30207531	Pavir.J02268.1	4254	5	-0.208394	0.8655	0.0245	0.0724	signalling.G-proteins	AT3G55020.1	Ypt/Rab-GAP domain of gyp1p superfamily protein
30291234	Pavir.Ba01975.1	2878	3	-0.208228	0.8656	0.0812	0.184	nucleotide metabolism.synthesis.purine.SAICAR synthetase	AT3G21110.1	purin 7
30270290	Pavir.Cb02179.1	4246	5	-0.208061	0.8657	0.0367	0.1003	amino acid metabolism.synthesis.aspartate family.misc.homoserine.homoserine dehydrogenase	AT5G21060.2	Glyceraldehyde-3-phosphate dehydrogenase-like family protein
30292908	Pavir.Ba02960.1	275	4	-0.208061	0.8657	0.0929	0.2034	transport.porins	AT3G01280.1	voltage dependent anion channel 1
30263740	Pavir.J08308.1	5302	1	-0.206562	0.8666	0.3038	0.4717	N/A	AT5G44060.1	N/A
30313688	Pavir.Eb04035.1	4108	4	-0.206395	0.8667	0.1167	0.2424	protein.synthesis.initiation	AT4G18040.1	eukaryotic translation initiation factor 4E
30312420	Pavir.Eb01363.1	3302	6	-0.206063	0.8669	0.0024	0.0105	N/A	AT3G62360.1	Carbohydrate-binding-like fold
30269834	Pavir.Cb00985.1	876	3	-0.205896	0.867	0.1397	0.2775	N/A	AT1G09340.1	chloroplast RNA binding
30206497	Pavir.Ca01772.1	3837	1	-0.20573	0.8671	0.0977	0.2111	N/A	AT5G11950.1	Putative lysine decarboxylase family protein
30228095	Pavir.Ea02862.1	3546	4	-0.20573	0.8671	0.084	0.1887	lipid metabolism.lipid degradation.beta-oxidation.enoyl CoA hydratase	AT1G06550.1	ATP-dependent caseinolytic (Clp) protease/crotonase family protein
30258341	Pavir.J01853.1	1771	7	-0.205397	0.8673	0.0284	0.0817	N/A	AT2G35155.1	Trypsin family protein
30290471	Pavir.Ba00584.1	1477	16	-0.204898	0.8676	0.0002	0.0012	N/A	AT3G07810.2	RNA-binding (RRM/RBD/RNP motifs) family protein
30283512	Pavir.J24548.1	5348	1	-0.204566	0.8678	0.3319	0.5015	protein.aa activation.glycine-tRNA ligase	AT3G48110.1	glycine-tRNA ligases
30231573	Pavir.Ea00743.1	2104	1	-0.204566	0.8678	0.4769	0.6399	tetrapyrrole synthesis.magnesium-protoporphyrin IX monomethyl ester (oxidative) cyclase	AT3G56940.1	dicarboxylate diiron protein, putative (Crd1)
30283612	Pavir.J14044.1	4963	2	-0.204566	0.8678	0.3053	0.4733	secondary metabolism.isoprenoids.carotenoids.phytoene dehydrogenase	AT4G14210.1	phytoene desaturase 3
30299517	Pavir.Bb02511.1	2752	6	-0.204067	0.8681	0.0854	0.1912	major CHO metabolism.degradation.starch.D enzyme	AT5G64860.1	disproportionating enzyme
30237619	Pavir.Ib01166.1	1030	25	-0.204067	0.8681	<.0001	<.0001	protein.targeting.chloroplast	AT3G46740.1	translocon at the outer envelope membrane of chloroplasts 75-III
30291743	Pavir.Ba00407.1	1244	18	-0.203901	0.8682	0.0033	0.0137	amino acid metabolism.synthesis.central amino acid metabolism.alanine.alanine aminotransferase	AT1G72330.1	alanine aminotransferase 2
30206112	Pavir.Ca01687.1	5112	1	-0.203568	0.8684	0.717	0.8235	N/A	N/A	N/A
30209098	Pavir.Ia03731.1	5251	3	-0.203568	0.8684	0.1725	0.3208	misc.aminotransferases.aminotransferase class IV family protein	AT5G27410.2	D-aminoacid aminotransferase-like PLP-dependent enzymes superfamily protein
30198920	Pavir.J23716.1	410	2	-0.203568	0.8684	0.1573	0.302	protein.synthesis.initiation	AT3G26400.1	eukaryotic translation initiation factor 4B1
30210573	Pavir.Ia04525.1	5061	3	-0.203568	0.8684	0.167	0.3146	N/A	AT5G64816.1	N/A
30274264	Pavir.J37401.1	3157	2	-0.203568	0.8684	0.3603	0.5279	N/A	N/A	N/A
30198037	Pavir.J06962.1	165	19	-0.20307	0.8687	0.0006	0.0032	glycolysis.cytosolic branch.phosphoglucomutase (PGM)	AT1G23190.1	Phosphoglucomutase/phosphomannomutase family protein
30261344	Pavir.Db01183.1	3769	5	-0.20307	0.8687	0.0637	0.1535	N/A	AT1G79390.1	N/A
30213063	Pavir.Ia04295.1	5231	2	-0.202738	0.8689	0.3405	0.5094	N/A	AT4G19100.1	Protein of unknown function (DUF3464)
30223377	Pavir.Gb01177.1	616	5	-0.202738	0.8689	0.0815	0.1845	protein.synthesis.elongation	AT1G62750.1	Translation elongation factor EFG/EF2 protein
30193161	Pavir.Da02278.1	4197	4	-0.202738	0.8689	0.0888	0.1964	N/A	AT1G31870.1	N/A
30279795	Pavir.Fb00567.1	274	100	-0.202572	0.869	<.0001	<.0001	N/A	N/A	N/A
30210700	Pavir.Ia00619.1	5221	1	-0.202406	0.8691	0.4146	0.5801	protein.synthesis.initiation.deoxyhypusine synthase	AT5G05920.1	deoxyhypusine synthase
30221824	Pavir.Gb02222.1	2306	11	-0.20224	0.8692	<.0001	<.0001	N/A	N/A	N/A
30207712	Pavir.J08954.1	442	4	-0.202074	0.8693	0.2525	0.417	redox.thioredoxin	AT1G76080.1	chloroplastic drought-induced stress protein of 32 kD
30251641	Pavir.Aa01386.1	2305	3	-0.202074	0.8693	0.0772	0.1768	RNA.regulation of transcription.unclassified	AT4G32720.1	La protein 1
30263430	Pavir.J00213.1	1134	26	-0.201908	0.8694	0.0039	0.0158	protein.synthesis.ribosomal protein.eukaryotic.60S subunit.P2	AT2G27710.1	60S acidic ribosomal protein family
30211917	Pavir.Ia04347.1	2209	2	-0.201742	0.8695	0.3661	0.5341	not assigned.no ontology	AT5G12040.1	Nitrilase/cyanide hydratase and apolipoprotein N-acyltransferase family protein
30241588	Pavir.Ib01315.1	1601	9	-0.201576	0.8696	0.1267	0.2582	misc.glutathione S transferases	AT3G55040.1	glutathione transferase lambda 2
30290603	Pavir.Ba01666.1	2912	4	-0.201576	0.8696	0.3431	0.5119	cell.organisation	AT4G31340.1	myosin heavy chain-related
30297169	Pavir.Bb03556.1	1117	13	-0.201244	0.8698	0.0059	0.0224	redox.thioredoxin	AT2G41680.1	NADPH-dependent thioredoxin reductase C
30190455	Pavir.J13344.1	3109	4	-0.201244	0.8698	0.1791	0.3291	DNA.repair	AT1G79650.1	Rad23 UV excision repair protein family
30263361	Pavir.J05880.1	539	20	-0.201079	0.8699	<.0001	<.0001	N/A	AT5G47690.1	binding
30206535	Pavir.Ca01300.1	2913	1	-0.200747	0.8701	0.6364	0.77	N/A	AT3G59840.1	N/A
30215586	Pavir.Ia04631.1	2673	3	-0.200747	0.8701	0.0581	0.1431	cell.cycle	AT3G19650.1	cyclin-related
30259855	Pavir.Db02147.1	4909	4	-0.200747	0.8701	0.1964	0.351	misc.GDSL-motif lipase	AT1G28600.1	GDSL-like Lipase/Acylhydrolase superfamily protein
30298364	Pavir.Bb00277.1	2417	13	-0.200747	0.8701	0.0061	0.023	PS.lightreaction.photosystem I.PSI polypeptide subunits	AT1G30380.1	photosystem I subunit K
30211953	Pavir.Ia01003.1	4614	3	-0.200747	0.8701	0.2445	0.4081	glycolysis.plastid branch.pyruvate kinase (PK)	AT3G22960.1	Pyruvate kinase family protein
30287325	Pavir.J04130.1	3503	4	-0.200415	0.8703	0.101	0.2165	N/A	AT4G22000.1	N/A
30249505	Pavir.Aa02486.1	1441	26	-0.199752	0.8707	<.0001	<.0001	development.unspecified	AT2G34040.1	Apoptosis inhibitory protein 5 (API5)
30249070	Pavir.Aa00301.1	3251	3	-0.199752	0.8707	0.0705	0.1653	protein.degradation.subtilases	AT3G14067.1	Subtilase family protein
30237982	Pavir.Ib01255.1	3260	8	-0.199587	0.8708	0.0066	0.0246	not assigned.no ontology.epsin N-terminal homology (ENTH) domain-containing protein	AT2G25430.1	epsin N-terminal homology (ENTH) domain-containing protein / clathrin assembly protein-related
30211178	Pavir.Ia01166.1	5399	1	-0.199421	0.8709	0.1579	0.3026	RNA.regulation of transcription.MYB-related transcription factor family	AT1G49950.1	telomere repeat binding factor 1
30227203	Pavir.Ea04046.1	4050	3	-0.199255	0.871	0.0599	0.1466	stress.abiotic.unspecified	AT3G62020.1	germin-like protein 10
30307543	Pavir.J23263.1	4973	2	-0.199255	0.871	0.0856	0.1914	not assigned.no ontology	AT5G56130.1	Transducin/WD40 repeat-like superfamily protein
30309162	Pavir.Eb01086.1	1961	13	-0.19909	0.8711	0.0052	0.0202	N/A	AT5G04910.1	N/A
30311346	Pavir.Eb00674.1	4519	2	-0.198924	0.8712	0.0968	0.2098	cell wall.degradation.mannan-xylose-arabinose-fucose	AT1G58370.1	glycosyl hydrolase family 10 protein / carbohydrate-binding domain-containing protein
30193089	Pavir.Da02314.1	4563	1	-0.198759	0.8713	0.3802	0.5481	N/A	AT1G76940.1	RNA-binding (RRM/RBD/RNP motifs) family protein
30214765	Pavir.Ia02164.1	4584	2	-0.198759	0.8713	0.1847	0.3367	lipid metabolism.lipid degradation.beta-oxidation.enoyl CoA hydratase	AT4G31810.1	ATP-dependent caseinolytic (Clp) protease/crotonase family protein
30240457	Pavir.Ib03326.1	2039	13	-0.198759	0.8713	0.0017	0.0078	not assigned.no ontology	AT2G37020.1	Translin family protein
30267697	Pavir.Cb01826.1	54	8	-0.198593	0.8714	0.0093	0.0327	protein.degradation.serine protease	AT5G50920.1	CLPC homologue 1
30187186	Pavir.Fa00871.1	2884	9	-0.198593	0.8714	0.0178	0.0555	protein.synthesis.ribosomal protein.prokaryotic.unknown organellar.50S subunit.L7/L12	AT1G68660.1	Ribosomal protein L12/ ATP-dependent Clp protease adaptor protein ClpS family protein
30273481	Pavir.J17192.1	3938	1	-0.198262	0.8716	0.3056	0.4736	protein.synthesis.ribosomal protein.eukaryotic.40S subunit.S8	AT5G20290.1	Ribosomal protein S8e family protein
30203703	Pavir.Ca02332.1	328	32	-0.198262	0.8716	<.0001	<.0001	protein.synthesis.elongation	AT4G29060.1	elongation factor Ts family protein
30258248	Pavir.J01704.1	5069	1	-0.198096	0.8717	0.4802	0.6426	N/A	AT3G01860.1	N/A
30246594	Pavir.J21107.1	946	29	-0.198096	0.8717	<.0001	<.0001	N/A	AT2G37660.1	NAD(P)-binding Rossmann-fold superfamily protein
30302874	Pavir.Ga00061.1	2249	3	-0.198096	0.8717	0.0491	0.1255	N/A	AT4G31430.2	N/A
30239946	Pavir.Ib04468.1	480	4	-0.197931	0.8718	0.086	0.1921	N/A	AT5G42960.1	N/A
30252892	Pavir.Aa00302.1	3294	4	-0.197765	0.8719	0.1904	0.344	protein.degradation.subtilases	AT3G14067.1	Subtilase family protein
30217566	Pavir.J10772.1	3021	4	-0.197765	0.8719	0.19	0.3437	not assigned.no ontology	AT5G48370.2	Thioesterase/thiol ester dehydrase-isomerase superfamily protein
30213746	Pavir.Ia04263.1	3758	5	-0.1976	0.872	0.091	0.1999	transport.ABC transporters and multidrug resistance systems	AT5G06530.1	ABC-2 type transporter family protein
30221372	Pavir.Gb00103.1	5188	1	-0.197435	0.8721	0.3809	0.5486	misc.oxidases - copper flavone etc	AT5G07480.1	KAR-UP oxidoreductase 1
30294723	Pavir.J02045.1	5410	1	-0.197269	0.8722	0.4546	0.6207	protein.targeting.secretory pathway.unspecified	AT4G08690.1	Sec14p-like phosphatidylinositol transfer family protein
30263062	Pavir.Db02471.1	4668	2	-0.197269	0.8722	0.4315	0.5978	amino acid metabolism.synthesis.aspartate family.methionine	AT4G38800.1	methylthioadenosine nucleosidase 1
30226152	Pavir.Ea00387.1	3632	4	-0.197269	0.8722	0.0151	0.0482	N/A	AT1G52590.1	Putative thiol-disulphide oxidoreductase DCC
30231867	Pavir.J01716.1	3549	4	-0.197269	0.8722	0.0661	0.1582	not assigned.no ontology	AT4G22360.1	SWIB complex BAF60b domain-containing protein
30254357	Pavir.J30656.1	2110	10	-0.197104	0.8723	0.0087	0.0309	minor CHO metabolism.others	AT2G37770.2	NAD(P)-linked oxidoreductase superfamily protein
30280506	Pavir.Fb00397.1	5132	1	-0.196938	0.8724	0.3289	0.498	protein.synthesis.ribosomal protein.eukaryotic.60S subunit.L34	AT1G26880.1	Ribosomal protein L34e superfamily protein
30232030	Pavir.Ab01449.1	5583	1	-0.196938	0.8724	0.403	0.5702	protein.synthesis.ribosomal protein.eukaryotic.60S subunit.L35	AT5G02610.1	Ribosomal L29 family protein
30302084	Pavir.J18095.1	4680	1	-0.196773	0.8725	0.4435	0.6095	transport.metabolite transporters at the mitochondrial membrane	AT4G01100.1	adenine nucleotide transporter 1
30187176	Pavir.Fa01907.1	1494	7	-0.196773	0.8725	0.0694	0.1635	secondary metabolism.phenylpropanoids.lignin biosynthesis.COMT	AT5G54160.1	O-methyltransferase 1
30301081	Pavir.Bb01906.1	4685	2	-0.196773	0.8725	0.0147	0.0471	RNA.regulation of transcription.Chromatin Remodeling Factors	AT4G22140.1	PHD finger family protein / bromo-adjacent homology (BAH) domain-containing protein
30229981	Pavir.Ea02781.1	158	23	-0.196608	0.8726	<.0001	<.0001	amino acid metabolism.synthesis.central amino acid metabolism.aspartate.aspartate aminotransferase	AT5G11520.1	aspartate aminotransferase 3
30260542	Pavir.Db00063.1	163	81	-0.196608	0.8726	<.0001	<.0001	PS.lightreaction.photosystem II.biogenesis	AT5G23120.1	photosystem II stability/assembly factor, chloroplast (HCF136)
30220130	Pavir.J01008.1	3882	3	-0.196442	0.8727	0.4451	0.6112	RNA.regulation of transcription	AT5G09830.1	BolA-like family protein
30290167	Pavir.Ba01240.1	2719	2	-0.196442	0.8727	0.1712	0.3193	DNA.repair	AT4G25290.1	DNA photolyases;DNA photolyases
30281131	Pavir.Fb00133.1	4903	2	-0.196442	0.8727	0.3023	0.4696	TCA / org transformation.TCA.succinate dehydrogenase	AT5G66760.1	succinate dehydrogenase 1-1
30204822	Pavir.Ca00785.1	1761	4	-0.195946	0.873	0.1015	0.2175	protein.postranslational modification.kinase.receptor like cytoplasmatic kinase VIII	AT2G47060.1	Protein kinase superfamily protein
30295593	Pavir.J12472.1	1636	1	-0.195781	0.8731	0.4094	0.5757	cell.vesicle transport	AT3G11130.1	Clathrin, heavy chain
30250922	Pavir.Aa00660.1	1733	15	-0.195616	0.8732	0.0037	0.0152	transport.metabolite transporters at the envelope membrane	AT3G08580.1	ADP/ATP carrier 1
30227665	Pavir.Ea00957.1	2088	12	-0.195616	0.8732	0.0096	0.0335	TCA / org transformation.other organic acid transformatons.atp-citrate lyase	AT3G06650.1	ATP-citrate lyase B-1
30310867	Pavir.Eb02427.1	3437	2	-0.195616	0.8732	0.1407	0.2785	not assigned.no ontology	AT2G47970.2	Nuclear pore localisation protein NPL4
30293111	Pavir.Ba00096.1	4295	3	-0.195451	0.8733	0.2011	0.3571	protein.synthesis.ribosomal protein.unknown.unknown	AT5G13720.1	Uncharacterised protein family (UPF0114)
30269276	Pavir.Cb00542.1	4754	2	-0.195286	0.8734	0.2519	0.4165	cell wall.degradation.pectate lyases and polygalacturonases	AT3G16850.1	Pectin lyase-like superfamily protein
30210515	Pavir.Ia01105.1	5183	5	-0.194955	0.8736	0.0231	0.0688	misc.beta 1 3 glucan hydrolases.glucan endo-1 3-beta-glucosidase	AT2G19440.1	O-Glycosyl hydrolases family 17 protein
30292108	Pavir.Ba02006.1	2636	4	-0.194955	0.8736	0.076	0.1745	DNA.synthesis/chromatin structure	AT5G67630.1	P-loop containing nucleoside triphosphate hydrolases superfamily protein
30192380	Pavir.Da00878.1	517	49	-0.194955	0.8736	<.0001	<.0001	glycolysis.cytosolic branch.phospho-enol-pyruvate carboxylase (PEPC)	AT3G14940.1	phosphoenolpyruvate carboxylase 3
30210121	Pavir.Ia04923.1	2992	2	-0.194955	0.8736	0.1834	0.3349	tetrapyrrole synthesis.uroporphyrinogen III synthase	AT2G26540.1	uroporphyrinogen-III synthase family protein
30249831	Pavir.Aa01534.1	186	25	-0.19479	0.8737	<.0001	<.0001	signalling.14-3-3 proteins	AT3G02520.1	general regulatory factor 7
30273216	Pavir.J04126.1	1421	1	-0.19446	0.8739	0.1003	0.2154	protein.synthesis.ribosomal protein.eukaryotic.40S subunit.S3	AT5G35530.1	Ribosomal protein S3 family protein
30301897	Pavir.J05005.1	5203	2	-0.19446	0.8739	0.2617	0.4268	N/A	AT5G32450.1	RNA binding (RRM/RBD/RNP motifs) family protein
30221015	Pavir.J30654.1	3959	6	-0.19413	0.8741	0.0775	0.1773	cell wall.cell wall proteins.LRR	AT4G06744.1	Leucine-rich repeat (LRR) family protein
30272206	Pavir.J07990.1	4517	2	-0.19413	0.8741	0.1311	0.2656	protein.targeting.nucleus	AT5G60980.2	Nuclear transport factor 2 (NTF2) family protein with RNA binding (RRM-RBD-RNP motifs) domain
30221173	Pavir.J26862.1	1123	1	-0.193965	0.8742	0.4914	0.6531	secondary metabolism.flavonoids.isoflavones.isoflavone reductase	AT1G75280.1	NmrA-like negative transcriptional regulator family protein
30240684	Pavir.Ib02422.1	1559	7	-0.193965	0.8742	0.053	0.1337	misc.glutathione S transferases	AT3G03190.1	glutathione S-transferase F11
30293082	Pavir.Ba00057.1	4712	2	-0.193965	0.8742	0.5201	0.6763	N/A	AT3G06035.1	Glycoprotein membrane precursor GPI-anchored
30290536	Pavir.Ba00884.1	4565	2	-0.193965	0.8742	0.0732	0.1694	development.squamosa promoter binding like (SPL)	AT1G02065.2	squamosa promoter binding protein-like 8
30256505	Pavir.J39633.1	4155	3	-0.193965	0.8742	0.4228	0.589	not assigned.no ontology	AT2G31670.1	Stress responsive alpha-beta barrel domain protein
30258582	Pavir.J01397.1	618	9	-0.193965	0.8742	0.0043	0.0173	N/A	AT2G17350.1	N/A
30242879	Pavir.Ib04433.1	1416	28	-0.1938	0.8743	0.0001	0.0006	not assigned.no ontology.S RNA-binding domain-containing protein	AT3G23700.1	Nucleic acid-binding proteins superfamily
30197054	Pavir.J33486.1	3008	5	-0.1938	0.8743	0.0109	0.0372	N/A	AT3G13224.2	RNA-binding (RRM/RBD/RNP motifs) family protein
30211513	Pavir.Ia04789.1	654	23	-0.193635	0.8744	<.0001	<.0001	N/A	AT2G23370.1	N/A
30205461	Pavir.Ca00927.1	4157	1	-0.19347	0.8745	0.6593	0.7861	signalling.G-proteins	AT5G46070.1	Guanylate-binding family protein
30201257	Pavir.J20212.1	640	23	-0.193305	0.8746	0.0018	0.0082	misc.peroxidases	AT1G44970.1	Peroxidase superfamily protein
30262409	Pavir.Db00088.1	4465	1	-0.19281	0.8749	0.5043	0.6624	hormone metabolism.auxin.induced-regulated-responsive-activated	AT2G46690.1	SAUR-like auxin-responsive protein family
30272928	Pavir.J19197.1	112	12	-0.192645	0.875	<.0001	<.0001	PS.lightreaction.other electron carrier (ox/red).ferredoxin reductase	AT5G66190.1	ferredoxin-NADP(+)-oxidoreductase 1
30229509	Pavir.Ea00110.1	4905	2	-0.192315	0.8752	0.3564	0.5242	protein.aa activation.aspartate-tRNA ligase	AT4G31180.1	Class II aminoacyl-tRNA and biotin synthetases superfamily protein
30190533	Pavir.J23967.1	5577	2	-0.192151	0.8753	0.2072	0.3641	RNA.processing	AT2G03870.1	Small nuclear ribonucleoprotein family protein
30276726	Pavir.J22800.1	4792	1	-0.191986	0.8754	0.2747	0.4413	N/A	AT1G26470.1	N/A
30258460	Pavir.J38028.1	56	54	-0.191986	0.8754	<.0001	<.0001	PS.lightreaction.photosystem I.PSI polypeptide subunits	AT1G31330.1	photosystem I subunit F
30298454	Pavir.Bb02791.1	3323	7	-0.191986	0.8754	0.0571	0.1417	protein.postranslational modification	AT3G19420.1	PTEN 2
30241876	Pavir.Ib02905.1	1002	6	-0.191821	0.8755	0.0017	0.0078	DNA.synthesis/chromatin structure	AT3G50360.1	centrin2
30210991	Pavir.Ia02278.1	4080	5	-0.191821	0.8755	0.0656	0.1571	misc.dynamin	AT3G60190.1	DYNAMIN-like 1E
30249395	Pavir.Aa00229.1	1594	5	-0.191821	0.8755	0.132	0.2667	protein.targeting.chloroplast	AT2G24820.1	translocon at the inner envelope membrane of chloroplasts 55-II
30225194	Pavir.J02647.1	4710	1	-0.191656	0.8756	0.3566	0.5243	RNA.processing	AT2G40650.1	PRP38 family protein
30207990	Pavir.J29187.1	4293	2	-0.191491	0.8757	0.1695	0.3172	N/A	AT3G05070.1	N/A
30216348	Pavir.J34008.1	2446	8	-0.191327	0.8758	0.0532	0.1341	redox.thioredoxin.PDIL	AT1G04980.1	PDI-like 2-2
30215723	Pavir.Ia01182.1	1985	13	-0.191162	0.8759	0.0008	0.0041	stress.abiotic.heat	AT5G04890.1	HSP20-like chaperones superfamily protein
30221574	Pavir.Gb00220.1	2624	7	-0.191162	0.8759	0.0707	0.1653	protein.postranslational modification	AT1G63500.1	Protein kinase protein with tetratricopeptide repeat domain
30212676	Pavir.Ia01172.1	22	162	-0.190997	0.876	<.0001	<.0001	RNA.transcription	AT3G46780.1	plastid transcriptionally active 16
30236270	Pavir.Ab02055.1	1428	20	-0.190668	0.8762	0.0039	0.0158	redox.thioredoxin	AT1G07700.1	Thioredoxin superfamily protein
30253546	Pavir.Aa00586.1	1914	18	-0.190668	0.8762	<.0001	<.0001	N/A	AT4G08280.1	Thioredoxin superfamily protein
30222675	Pavir.Gb01364.1	3809	2	-0.190503	0.8763	0.1679	0.3154	protein.degradation.ubiquitin.proteasom	AT4G24820.1	26S proteasome, regulatory subunit Rpn7;Proteasome component (PCI) domain
30227562	Pavir.Ea01733.1	4167	1	-0.190174	0.8765	0.1855	0.3378	N/A	AT3G51500.1	N/A
30216162	Pavir.J08909.1	5474	1	-0.190174	0.8765	0.4078	0.5745	stress.abiotic.cold	AT5G55530.1	Calcium-dependent lipid-binding (CaLB domain) family protein
30300981	Pavir.Bb01943.1	2756	11	-0.18968	0.8768	0.0213	0.0643	N/A	AT4G15802.1	heat shock factor binding protein
30228488	Pavir.Ea02352.1	4383	1	-0.189516	0.8769	0.6183	0.7578	RNA.processing.splicing	AT1G27650.1	U2 snRNP auxiliary factor small subunit, putative
30187055	Pavir.Fa00043.1	2139	15	-0.189516	0.8769	0.0129	0.0427	protein.degradation	AT2G27920.1	serine carboxypeptidase-like 51
30186758	Pavir.Fa00230.1	1869	5	-0.189516	0.8769	0.0477	0.123	N/A	AT5G53620.1	N/A
30306413	Pavir.J06570.1	4937	2	-0.189351	0.877	0.221	0.381	mitochondrial electron transport / ATP synthesis.cytochrome c reductase	AT3G10860.1	Cytochrome b-c1 complex, subunit 8 protein
30261106	Pavir.Db00194.1	2715	2	-0.189351	0.877	0.2795	0.4468	not assigned.no ontology	AT2G16860.1	GCIP-interacting family protein
30224404	Pavir.Gb01557.1	3124	6	-0.189187	0.8771	0.1568	0.3015	N/A	AT4G39860.1	N/A
30187051	Pavir.Fa00936.1	3535	8	-0.189022	0.8772	0.1606	0.3064	N/A	AT5G58005.1	Cytochrome c oxidase, subunit Vib family protein
30246400	Pavir.J00050.1	4068	3	-0.189022	0.8772	0.3576	0.5254	misc.peroxidases	AT4G37530.1	Peroxidase superfamily protein
30273803	Pavir.J24636.1	533	28	-0.188858	0.8773	0.0018	0.0082	protein.synthesis.ribosomal protein.eukaryotic.40S subunit.S4	AT5G58420.1	Ribosomal protein S4 (RPS4A) family protein
30269985	Pavir.Cb00914.1	1456	7	-0.188365	0.8776	0.079	0.18	cell.vesicle transport	AT5G08080.1	syntaxin of plants 132
30283974	Pavir.J04887.1	495	8	-0.188365	0.8776	0.0042	0.0169	N/A	AT4G15545.1	N/A
30217677	Pavir.J05337.1	2768	10	-0.187871	0.8779	0.0029	0.0123	tetrapyrrole synthesis.protoporphyrin IX oxidase	AT4G01690.1	Flavin containing amine oxidoreductase family
30259568	Pavir.J03191.1	3041	5	-0.187871	0.8779	0.1399	0.2776	protein.degradation.ubiquitin.E2	AT5G59300.1	ubiquitin carrier protein 7
30251268	Pavir.Aa00537.1	5063	1	-0.187543	0.8781	0.6648	0.7896	misc.oxidases - copper flavone etc	AT2G32300.1	uclacyanin 1
30246418	Pavir.J11289.1	4895	3	-0.187379	0.8782	0.1906	0.3442	development.unspecified	AT2G34040.1	Apoptosis inhibitory protein 5 (API5)
30198089	Pavir.J26988.1	4136	1	-0.187214	0.8783	0.1197	0.2468	PS.lightreaction.photosystem II.PSII polypeptide subunits	AT5G51545.1	low psii accumulation2
30300837	Pavir.Bb03610.1	2910	8	-0.18705	0.8784	0.0462	0.1204	protein.synthesis.ribosomal protein.eukaryotic.60S subunit.L18	AT5G27850.1	Ribosomal protein L18e/L15 superfamily protein
30268802	Pavir.Cb02076.1	5073	1	-0.186722	0.8786	0.2099	0.3673	not assigned.no ontology	AT5G22460.1	alpha/beta-Hydrolases superfamily protein
30280462	Pavir.Fb00848.1	4906	2	-0.186722	0.8786	0.1889	0.3425	nucleotide metabolism.phosphotransfer and pyrophosphatases.adenylate kinase	AT5G35170.1	adenylate kinase family protein
30263007	Pavir.Db00788.1	910	17	-0.186557	0.8787	0.0193	0.0592	N/A	AT1G62780.1	N/A
30293800	Pavir.Ba01806.1	617	24	-0.186557	0.8787	0.0027	0.0116	N/A	N/A	N/A
30313295	Pavir.Eb01273.1	2409	1	-0.186393	0.8788	0.5002	0.6593	protein.postranslational modification.kinase.receptor like cytoplasmatic kinase VIII	AT2G47060.1	Protein kinase superfamily protein
30186975	Pavir.Fa00854.1	229	48	-0.186393	0.8788	<.0001	<.0001	signalling.14-3-3 proteins	AT3G02520.1	general regulatory factor 7
30203948	Pavir.Ca02141.1	2151	11	-0.186229	0.8789	0.0006	0.0032	stress.abiotic.unspecified	AT3G62020.1	germin-like protein 10
30237931	Pavir.Ib00064.1	232	2	-0.186229	0.8789	0.2041	0.3601	protein.synthesis.ribosomal protein.prokaryotic.chloroplast.50S subunit.L11	AT1G32990.1	plastid ribosomal protein l11
30193759	Pavir.Da01824.1	1209	2	-0.186065	0.879	0.3072	0.4749	major CHO metabolism.degradation.starch.glucan water dikinase	AT1G10760.1	Pyruvate phosphate dikinase, PEP/pyruvate binding domain
30258110	Pavir.J39921.1	2845	1	-0.185737	0.8792	0.6312	0.7666	protein.degradation.ubiquitin	AT2G21270.1	ubiquitin fusion degradation 1
30227890	Pavir.Ea03565.1	3074	3	-0.185737	0.8792	0.1363	0.2727	N/A	AT1G34570.1	Essential protein Yae1, N-terminal
30241122	Pavir.Ib00113.1	1602	21	-0.185737	0.8792	0.0024	0.0105	RNA.regulation of transcription.unclassified	AT5G23750.2	Remorin family protein
30295337	Pavir.J18283.1	3706	4	-0.185573	0.8793	0.0677	0.1609	N/A	ATCG00770.1	ribosomal protein S8
30196562	Pavir.J03989.1	2948	4	-0.185573	0.8793	0.1775	0.3275	protein.degradation.serine protease	AT1G15000.1	serine carboxypeptidase-like 50
30199884	Pavir.J07714.1	2940	3	-0.185409	0.8794	0.0553	0.1382	protein.synthesis.initiation	AT1G76810.1	eukaryotic translation initiation factor 2 (eIF-2) family protein
30318079	Pavir.Ha00404.1	4433	4	-0.185409	0.8794	0.2616	0.4268	redox.thioredoxin	AT5G66410.1	phosducin-like protein 3 homolog
30290016	Pavir.Ba02479.1	1900	11	-0.185409	0.8794	0.0114	0.0385	glycolysis.plastid branch.phosphoglucomutase (PGM)	AT5G17530.3	phosphoglucosamine mutase family protein
30280437	Pavir.Fb01392.1	1885	5	-0.185245	0.8795	0.1718	0.3198	misc.glutathione S transferases	AT3G03190.1	glutathione S-transferase F11
30232924	Pavir.Ab03147.1	1881	5	-0.18508	0.8796	0.3631	0.5309	protein.targeting.chloroplast	AT2G24820.1	translocon at the inner envelope membrane of chloroplasts 55-II
30302417	Pavir.Ga01239.1	3370	5	-0.184916	0.8797	0.0359	0.0986	protein.postranslational modification	AT5G61640.1	peptidemethionine sulfoxide reductase 1
30299862	Pavir.Bb01955.1	5094	2	-0.184916	0.8797	0.0142	0.0459	mitochondrial electron transport / ATP synthesis.cytochrome c oxidase	AT4G39740.1	Thioredoxin superfamily protein
30186016	Pavir.Fa00753.1	3634	1	-0.184752	0.8798	0.4558	0.6213	not assigned.no ontology	AT5G13020.1	Emsy N Terminus (ENT)/ plant Tudor-like domains-containing protein
30200752	Pavir.J40541.1	4976	1	-0.184589	0.8799	0.2776	0.4453	not assigned.no ontology	AT1G33980.2	Smg-4/UPF3 family protein
30229681	Pavir.Ea00887.1	3806	3	-0.184425	0.88	0.2231	0.3838	not assigned.no ontology	AT5G48960.1	HAD-superfamily hydrolase, subfamily IG, 5\'-nucleotidase
30271789	Pavir.J33973.1	2312	7	-0.184425	0.88	0.0308	0.0873	protein.degradation	AT1G73170.1	P-loop containing nucleoside triphosphate hydrolases superfamily protein
30265915	Pavir.Hb01541.1	4877	1	-0.183605	0.8805	0.4022	0.5697	nucleotide metabolism.degradation	AT5G18280.2	apyrase 2
30226780	Pavir.Ea00938.1	4698	2	-0.183605	0.8805	0.1576	0.3024	cell.vesicle transport	AT5G46860.1	Syntaxin/t-SNARE family protein
30238017	Pavir.Ib01004.1	973	28	-0.183605	0.8805	0.0002	0.0012	protein.targeting.chloroplast	AT5G05000.1	translocon at the outer envelope membrane of chloroplasts 34
30203640	Pavir.Ca01006.1	2510	10	-0.183277	0.8807	0.0715	0.1666	transport.ABC transporters and multidrug resistance systems	AT1G79600.1	Protein kinase superfamily protein
30238984	Pavir.Ib02399.1	2439	11	-0.183114	0.8808	0.008	0.0287	amino acid metabolism.synthesis.branched chain group.common.branched-chain amino acid aminotransferase	AT5G65780.1	branched-chain amino acid aminotransferase 5 / branched-chain amino acid transaminase 5 (BCAT5)
30187385	Pavir.Fa01769.1	2106	15	-0.18295	0.8809	0.0174	0.0545	lipid metabolism.FA synthesis and FA elongation.beta hydroxyacyl ACP dehydratase	AT2G22230.1	Thioesterase superfamily protein
30292784	Pavir.Ba01603.1	2689	7	-0.18295	0.8809	0.0819	0.1851	N/A	AT1G26470.1	N/A
30315431	Pavir.J00263.1	1926	19	-0.182786	0.881	<.0001	<.0001	protein.synthesis.ribosomal protein.prokaryotic.chloroplast.30S subunit.S9	AT1G74970.1	ribosomal protein S9
30309086	Pavir.Eb02114.1	5585	1	-0.182622	0.8811	0.5417	0.6941	N/A	AT2G25910.1	3\'-5\' exonuclease domain-containing protein / K homology domain-containing protein / KH domain-containing protein
30306386	Pavir.J28103.1	1332	15	-0.182622	0.8811	0.0018	0.0082	protein.degradation.cysteine protease	AT1G50670.1	OTU-like cysteine protease family protein
30300632	Pavir.Bb02800.1	3635	8	-0.182459	0.8812	0.1938	0.3481	development.squamosa promoter binding like (SPL)	AT2G33810.1	squamosa promoter binding protein-like 3
30267548	Pavir.Cb01891.1	4424	1	-0.182295	0.8813	0.5567	0.7074	misc.glutathione S transferases	AT2G02390.1	glutathione S-transferase zeta 1
30203834	Pavir.Ca01530.1	525	10	-0.182295	0.8813	0.0237	0.0705	N/A	AT4G16830.1	Hyaluronan / mRNA binding family
30213359	Pavir.Ia01002.1	2733	5	-0.182295	0.8813	0.0917	0.2013	N/A	AT2G16270.1	N/A
30266327	Pavir.Hb01181.1	3478	2	-0.182131	0.8814	0.4373	0.6035	N/A	N/A	N/A
30228665	Pavir.Ea00138.1	3529	3	-0.181968	0.8815	0.2361	0.3993	N/A	AT2G46420.1	Plant protein 1589 of unknown function
30284757	Pavir.J37369.1	3673	3	-0.181804	0.8816	0.1524	0.2959	not assigned.no ontology.hydroxyproline rich proteins	AT3G14010.4	CTC-interacting domain 4
30290866	Pavir.Ba01391.1	3401	5	-0.181477	0.8818	0.0721	0.1677	N/A	AT2G44360.1	N/A
30269409	Pavir.Cb00878.1	253	36	-0.181313	0.8819	0.0003	0.0017	protein.synthesis.elongation	AT4G29060.1	elongation factor Ts family protein
30206739	Pavir.Ca02452.1	2587	7	-0.181149	0.882	0.178	0.3281	misc.dynamin	AT1G60500.1	Dynamin related protein 4C
30205667	Pavir.Ca02836.1	2860	1	-0.180986	0.8821	0.28	0.4472	protein.synthesis.ribosome biogenesis.Assembly factors.misc	AT5G57120.1	N/A
30305781	Pavir.Ga01079.1	3259	3	-0.180986	0.8821	0.139	0.2767	N/A	AT3G20050.1	T-complex protein 1 alpha subunit
30193345	Pavir.Da02287.1	273	7	-0.180986	0.8821	0.0807	0.1832	PS.calvin cycle.transketolase	AT2G45290.1	Transketolase
30236817	Pavir.Ib00396.1	901	1	-0.180822	0.8822	0.1673	0.3147	DNA.synthesis/chromatin structure.histone.core.H2A	AT3G54560.1	histone H2A 11
30297872	Pavir.Bb03735.1	1739	1	-0.180822	0.8822	0.5884	0.7358	not assigned.no ontology.hydroxyproline rich proteins	AT2G39050.1	hydroxyproline-rich glycoprotein family protein
30297059	Pavir.Bb03571.1	1032	29	-0.180822	0.8822	0.0002	0.0012	N-metabolism.ammonia metabolism.glutamate synthase.ferredoxin dependent	AT5G04140.1	glutamate synthase 1
30261298	Pavir.Db00485.1	2493	3	-0.180659	0.8823	0.0608	0.1481	development.unspecified	AT5G44730.1	Haloacid dehalogenase-like hydrolase (HAD) superfamily protein
30227264	Pavir.Ea01254.1	4437	3	-0.180659	0.8823	0.1827	0.3341	N/A	AT1G02475.1	Polyketide cyclase/dehydrase and lipid transport superfamily protein
30223786	Pavir.Gb01494.1	2930	6	-0.179841	0.8828	0.0121	0.0405	misc.GCN5-related N-acetyltransferase	AT1G24040.1	Acyl-CoA N-acyltransferases (NAT) superfamily protein
30232448	Pavir.Ab02833.1	1616	6	-0.179678	0.8829	0.0355	0.0976	not assigned.no ontology	AT1G67230.1	little nuclei1
30268004	Pavir.Cb01470.1	815	7	-0.179678	0.8829	0.0657	0.1573	signalling.G-proteins	AT1G52380.1	NUP50 (Nucleoporin 50 kDa) protein
30188730	Pavir.Fa00504.1	3306	5	-0.179678	0.8829	0.0608	0.1481	N/A	AT3G12640.1	RNA binding (RRM/RBD/RNP motifs) family protein
30214763	Pavir.Ia01423.1	3886	1	-0.179351	0.8831	0.1869	0.3398	cell.vesicle transport	AT4G34660.1	SH3 domain-containing protein
30285235	Pavir.J40293.1	4160	2	-0.179351	0.8831	0.2786	0.446	N/A	AT5G25770.3	alpha/beta-Hydrolases superfamily protein
30205047	Pavir.Ca01466.1	5084	1	-0.178861	0.8834	0.5534	0.7046	not assigned.no ontology	AT5G42570.1	B-cell receptor-associated 31-like
30210821	Pavir.Ia03653.1	636	10	-0.178861	0.8834	0.0039	0.0158	amino acid metabolism.synthesis.glutamate family.arginine.acetylglutamate kinase	AT2G37500.1	arginine biosynthesis protein ArgJ family
30269061	Pavir.Cb00946.1	2729	5	-0.178861	0.8834	0.1328	0.2679	stress.abiotic.heat	AT5G06410.1	DNAJ heat shock N-terminal domain-containing protein
30299572	Pavir.Bb00409.1	3286	3	-0.178698	0.8835	0.4839	0.6455	protein.synthesis.ribosomal protein.eukaryotic.60S subunit.P2	AT2G27710.1	60S acidic ribosomal protein family
30248470	Pavir.J28372.1	3842	3	-0.178698	0.8835	0.2157	0.3744	N/A	AT5G16260.1	RNA binding (RRM/RBD/RNP motifs) family protein
30247535	Pavir.J09705.1	5314	1	-0.178535	0.8836	0.324	0.4927	N/A	AT1G21065.1	N/A
30204010	Pavir.Ca00410.1	177	4	-0.178535	0.8836	0.1904	0.344	nucleotide metabolism.phosphotransfer and pyrophosphatases.adenylate kinase	AT5G63400.1	adenylate kinase 1
30244952	Pavir.J08510.1	391	24	-0.178371	0.8837	<.0001	<.0001	N/A	AT2G35410.1	RNA-binding (RRM/RBD/RNP motifs) family protein
30312269	Pavir.Eb02171.1	3593	2	-0.178371	0.8837	0.3425	0.5112	tetrapyrrole synthesis.uroporphyrinogen decarboxylase	AT3G14930.1	Uroporphyrinogen decarboxylase
30202210	Pavir.J27222.1	4097	4	-0.178045	0.8839	0.1176	0.2436	signalling.calcium	AT1G05150.1	Calcium-binding tetratricopeptide family protein
30301378	Pavir.Bb01660.1	4438	4	-0.177882	0.884	0.0626	0.1515	lipid metabolism.FA synthesis and FA elongation.long chain fatty acid CoA ligase	AT2G04350.1	AMP-dependent synthetase and ligase family protein
30280488	Pavir.Fb02020.1	656	13	-0.177882	0.884	0.0085	0.0303	N/A	AT3G63540.1	Mog1/PsbP/DUF1795-like photosystem II reaction center PsbP family protein
30216980	Pavir.J00730.1	2516	1	-0.177555	0.8842	0.1017	0.2178	signalling.calcium	AT1G08450.1	calreticulin 3
30297939	Pavir.Bb00078.1	3795	5	-0.177555	0.8842	0.1766	0.3264	misc.plastocyanin-like	AT2G27035.1	early nodulin-like protein 20
30231093	Pavir.Ea03627.1	2514	9	-0.177066	0.8845	0.0104	0.0358	PS.lightreaction.NADH DH	AT5G58260.1	oxidoreductases, acting on NADH or NADPH, quinone or similar compound as acceptor
30210349	Pavir.Ia03857.1	2990	8	-0.176903	0.8846	0.0688	0.1625	protein.targeting.secretory pathway.vacuole	AT3G19770.1	Vacuolar sorting protein 9 (VPS9) domain
30261793	Pavir.Db02476.1	347	179	-0.17674	0.8847	<.0001	<.0001	PS.lightreaction.other electron carrier (ox/red).plastocyanin	AT1G76100.1	plastocyanin 1
30204676	Pavir.Ca01993.1	5201	1	-0.176577	0.8848	0.3513	0.5194	N/A	AT5G01010.2	N/A
30301118	Pavir.Bb00477.1	2617	2	-0.176414	0.8849	0.3177	0.486	amino acid metabolism.synthesis.aromatic aa.tryptophan.tryptophan synthase	AT4G02610.1	Aldolase-type TIM barrel family protein
30312506	Pavir.Eb01120.1	1342	4	-0.176251	0.885	0.1608	0.3066	protein.postranslational modification	AT4G11260.1	phosphatase-related
30316760	Pavir.Ha00072.1	3538	5	-0.176251	0.885	0.071	0.1658	protein.aa activation.serine-tRNA ligase	AT1G11870.2	Seryl-tRNA synthetase
30300268	Pavir.Bb03696.1	3084	7	-0.176088	0.8851	0.0965	0.2092	protein.degradation.serine protease	AT5G26860.1	lon protease 1
30310438	Pavir.Eb02433.1	952	7	-0.175762	0.8853	0.1304	0.2647	N/A	AT1G51510.1	RNA-binding (RRM/RBD/RNP motifs) family protein
30260944	Pavir.Db00191.1	4115	2	-0.175599	0.8854	0.5342	0.688	misc.protease inhibitor/seed storage/lipid transfer protein (LTP) family protein	AT1G62790.2	Bifunctional inhibitor/lipid-transfer protein/seed storage 2S albumin superfamily protein
30263325	Pavir.J39967.1	569	46	-0.175599	0.8854	<.0001	<.0001	secondary metabolism.flavonoids.isoflavones.isoflavone reductase	AT1G75290.1	NAD(P)-binding Rossmann-fold superfamily protein
30212363	Pavir.Ia04462.1	1027	2	-0.175436	0.8855	0.2757	0.4426	DNA.synthesis/chromatin structure	AT2G47450.1	chloroplast signal recognition particle component (CAO)
30240120	Pavir.Ib01922.1	5146	1	-0.175273	0.8856	0.7048	0.8155	N/A	AT5G55640.1	N/A
30291102	Pavir.Ba02207.1	3127	4	-0.175273	0.8856	0.1773	0.3274	glycolysis.cytosolic branch.enolase	AT1G74030.1	enolase 1
30269914	Pavir.Cb00876.1	4957	2	-0.175273	0.8856	0.3802	0.5481	signalling.misc	AT3G05490.1	ralf-like 22
30191704	Pavir.Da00085.1	3134	3	-0.175273	0.8856	0.3865	0.5539	N/A	AT1G05205.1	N/A
30310287	Pavir.Eb01760.1	5143	1	-0.174621	0.886	0.2563	0.4206	protein.degradation.ubiquitin.E2	AT4G27960.2	ubiquitin conjugating enzyme 9
30186345	Pavir.Fa02269.1	5473	1	-0.174621	0.886	0.631	0.7665	not assigned.no ontology.pentatricopeptide (PPR) repeat-containing protein	AT1G53600.1	Tetratricopeptide repeat (TPR)-like superfamily protein
30252742	Pavir.Aa03110.1	4785	2	-0.174459	0.8861	0.6188	0.7578	N/A	AT3G01435.1	Expressed protein
30259057	Pavir.J05203.1	2219	12	-0.174459	0.8861	0.0069	0.0254	PS.lightreaction.NADH DH	AT5G58260.1	oxidoreductases, acting on NADH or NADPH, quinone or similar compound as acceptor
30226288	Pavir.Ea02634.1	4140	2	-0.174296	0.8862	0.1784	0.3285	lipid metabolism.lipid degradation.lipases	AT2G42690.1	alpha/beta-Hydrolases superfamily protein
30223836	Pavir.Gb02257.1	2015	8	-0.174296	0.8862	0.0252	0.0739	nucleotide metabolism.phosphotransfer and pyrophosphatases.uridylate kinase	AT4G25280.1	P-loop containing nucleoside triphosphate hydrolases superfamily protein
30269511	Pavir.Cb00755.1	4999	2	-0.17397	0.8864	0.3396	0.5084	redox.ascorbate and glutathione.ascorbate.L-galactose dehydrogenase	AT4G33670.1	NAD(P)-linked oxidoreductase superfamily protein
30236797	Pavir.Ib02081.1	3455	2	-0.17397	0.8864	0.1851	0.3372	RNA.regulation of transcription.WRKY domain transcription factor family	AT1G13960.1	WRKY DNA-binding protein 4
30229826	Pavir.Ea00209.1	2535	9	-0.173807	0.8865	0.0142	0.0459	N/A	N/A	N/A
30313170	Pavir.Eb02025.1	4398	2	-0.173482	0.8867	0.4776	0.6405	development.unspecified	AT4G32551.2	LisH dimerisation motif;WD40/YVTN repeat-like-containing domain
30222791	Pavir.Gb01299.1	1463	24	-0.173482	0.8867	<.0001	<.0001	N/A	AT2G43180.3	Phosphoenolpyruvate carboxylase family protein
30221551	Pavir.Gb02433.1	1025	8	-0.173319	0.8868	0.0693	0.1634	protein.synthesis.initiation	AT1G17220.1	Translation initiation factor 2, small GTP-binding protein
30214876	Pavir.Ia00744.1	4092	1	-0.173157	0.8869	0.3789	0.547	cell.organisation	AT4G14960.2	Tubulin/FtsZ family protein
30255204	Pavir.J09272.1	4043	5	-0.173157	0.8869	0.0186	0.0576	not assigned.no ontology	AT5G11540.1	D-arabinono-1,4-lactone oxidase family protein
30260575	Pavir.Db00027.1	60	37	-0.173157	0.8869	0.0001	0.0006	protein.degradation.metalloprotease	AT1G50250.1	FTSH protease 1
30185837	Pavir.Fa02069.1	472	41	-0.172831	0.8871	<.0001	<.0001	PS.lightreaction.photosystem II.PSII polypeptide subunits	AT1G79040.1	photosystem II subunit R
30206817	Pavir.Ca00517.1	4765	2	-0.172669	0.8872	0.2262	0.3878	protein.postranslational modification	AT2G42810.2	protein phosphatase 5.2
30298023	Pavir.Bb01601.1	5074	2	-0.172344	0.8874	0.3828	0.5506	RNA.processing	AT3G52120.1	SWAP (Suppressor-of-White-APricot)/surp domain-containing protein / D111/G-patch domain-containing protein
30187717	Pavir.Fa00064.1	4802	1	-0.172018	0.8876	0.5351	0.6884	protein.targeting.mitochondria	AT5G43970.1	translocase of outer membrane 22-V
30309481	Pavir.Eb03899.1	1212	17	-0.171856	0.8877	0.0229	0.0683	signalling.calcium	AT1G24620.1	EF hand calcium-binding protein family
30186734	Pavir.Fa01896.1	1076	24	-0.171856	0.8877	0.001	0.0049	not assigned.no ontology	AT4G27585.1	SPFH/Band 7/PHB domain-containing membrane-associated protein family
30255273	Pavir.J04025.1	2844	7	-0.171856	0.8877	0.0447	0.1171	N/A	AT1G78995.1	N/A
30300575	Pavir.Bb01673.1	153	7	-0.171531	0.8879	0.2438	0.4074	RNA.regulation of transcription.unclassified	AT3G52150.1	RNA-binding (RRM/RBD/RNP motifs) family protein
30278851	Pavir.Fb01341.1	1768	15	-0.171531	0.8879	0.0072	0.0263	protein.synthesis.elongation	AT4G11120.1	translation elongation factor Ts (EF-Ts), putative
30284434	Pavir.J15962.1	4488	3	-0.171044	0.8882	0.0721	0.1677	stress.abiotic.heat	AT5G20970.1	HSP20-like chaperones superfamily protein
30244126	Pavir.J25879.1	3834	5	-0.170881	0.8883	0.0444	0.1165	N/A	AT3G45050.2	N/A
30188028	Pavir.Fa00858.1	3990	3	-0.170881	0.8883	0.0079	0.0285	N/A	AT4G01150.1	N/A
30284428	Pavir.J20554.1	4541	2	-0.170719	0.8884	0.2865	0.4537	nucleotide metabolism.synthesis.purine.SAICAR lyase	AT1G36280.1	L-Aspartase-like family protein
30250457	Pavir.Aa03481.1	2472	14	-0.170556	0.8885	0.0113	0.0383	protein.aa activation.glutamate-tRNA ligase	AT5G64050.1	glutamate tRNA synthetase
30289481	Pavir.Ba00752.1	417	27	-0.170556	0.8885	0.0022	0.0098	N/A	AT4G21210.1	PPDK regulatory protein
30295609	Pavir.J34817.1	1106	1	-0.170394	0.8886	0.4281	0.5938	protein.degradation.ubiquitin	AT5G50870.1	ubiquitin-conjugating enzyme 27
30297307	Pavir.Bb03397.1	3572	5	-0.170232	0.8887	0.1951	0.3497	secondary metabolism.isoprenoids.carotenoids	AT3G09580.1	FAD/NAD(P)-binding oxidoreductase family protein
30308977	Pavir.Eb03054.1	4757	2	-0.170232	0.8887	0.4379	0.6039	misc.UDP glucosyl and glucoronyl transferases	AT3G16520.3	UDP-glucosyl transferase 88A1
30267015	Pavir.J20281.1	581	12	-0.169907	0.8889	0.0678	0.1611	N/A	AT4G09040.1	RNA-binding (RRM/RBD/RNP motifs) family protein
30283761	Pavir.J05690.1	5223	1	-0.169258	0.8893	0.4988	0.6583	protein.degradation.ubiquitin.E3.RING	AT2G35330.1	RING/U-box superfamily protein
30204009	Pavir.Ca02078.1	5156	1	-0.169258	0.8893	0.5638	0.7134	N/A	AT3G13510.1	Protein of Unknown Function (DUF239)
30230126	Pavir.Ea01913.1	2769	4	-0.169258	0.8893	0.0942	0.2053	misc.misc2	AT1G15390.1	peptide deformylase 1A
30275373	Pavir.J19252.1	3895	3	-0.169096	0.8894	0.0801	0.182	N/A	AT4G34340.1	TBP-associated factor 8
30301659	Pavir.Bb00178.1	3227	3	-0.168933	0.8895	0.2649	0.4304	not assigned.no ontology	AT1G14060.1	GCK domain-containing protein
30244704	Pavir.J32183.1	1041	2	-0.168933	0.8895	0.3958	0.564	signalling.G-proteins	AT2G44610.1	Ras-related small GTP-binding family protein
30281584	Pavir.J03580.1	209	24	-0.168933	0.8895	<.0001	<.0001	PS.calvin cycle.seduheptulose bisphosphatase	AT3G55800.1	sedoheptulose-bisphosphatase
30255946	Pavir.J01745.1	382	19	-0.168933	0.8895	0.0509	0.1293	N/A	AT1G71730.1	N/A
30277816	Pavir.J38299.1	4630	1	-0.168771	0.8896	0.3161	0.4846	minor CHO metabolism.callose	AT3G07160.1	glucan synthase-like 10
30292538	Pavir.Ba03876.1	1790	5	-0.168771	0.8896	0.2077	0.3646	OPP.electron transfer	AT1G30510.2	root FNR 2
30276635	Pavir.J02425.1	2605	1	-0.168609	0.8897	0.6218	0.76	protein.degradation.ubiquitin.proteasom	AT3G60820.1	N-terminal nucleophile aminohydrolases (Ntn hydrolases) superfamily protein
30227994	Pavir.Ea02933.1	1902	14	-0.168447	0.8898	0.0014	0.0066	not assigned.no ontology	AT2G25870.1	haloacid dehalogenase-like hydrolase family protein
30266049	Pavir.Hb01186.1	1970	16	-0.168447	0.8898	0.0499	0.1273	transport.ABC transporters and multidrug resistance systems	AT4G31390.1	Protein kinase superfamily protein
30224184	Pavir.Gb01666.1	3744	3	-0.168447	0.8898	0.2783	0.4459	protein.degradation.subtilases	AT5G51750.1	subtilase 1.3
30282116	Pavir.J36736.1	57	83	-0.168447	0.8898	<.0001	<.0001	not assigned.no ontology	AT5G53490.3	Tetratricopeptide repeat (TPR)-like superfamily protein
30312982	Pavir.Eb00604.1	3682	4	-0.168447	0.8898	0.0636	0.1534	N/A	AT1G18060.1	N/A
30204300	Pavir.Ca00917.1	3380	1	-0.168123	0.89	0.5112	0.6684	protein.degradation.ubiquitin.E2	AT1G16890.2	ubiquitin-conjugating enzyme 36
30260445	Pavir.Db01523.1	3945	3	-0.168123	0.89	0.2882	0.4554	protein.synthesis.ribosomal protein.eukaryotic.40S subunit.S24	AT3G04920.1	Ribosomal protein S24e family protein
30288720	Pavir.Ba03755.1	1941	10	-0.168123	0.89	0.0228	0.0681	RNA.processing	AT4G20440.1	small nuclear ribonucleoprotein associated protein B
30188272	Pavir.Fa02398.1	3400	3	-0.168123	0.89	0.359	0.5268	N/A	AT3G44330.1	N/A
30227555	Pavir.Ea03174.1	2696	10	-0.167961	0.8901	0.0293	0.0839	secondary metabolism.isoprenoids.non-mevalonate pathway.CMK	AT2G26930.1	4-(cytidine 5\'-phospho)-2-C-methyl-D-erithritol kinase
30241077	Pavir.Ib00734.1	322	17	-0.167961	0.8901	0.0225	0.0674	protein.targeting.mitochondria	AT3G02090.1	Insulinase (Peptidase family M16) protein
30277592	Pavir.J02329.1	5501	1	-0.167637	0.8903	0.386	0.5537	mitochondrial electron transport / ATP synthesis.F1-ATPase	AT4G29480.1	Mitochondrial ATP synthase subunit G protein
30208519	Pavir.J36580.1	2650	1	-0.167637	0.8903	0.5708	0.7193	protein.synthesis.ribosomal protein.eukaryotic.60S subunit.L6	AT1G74050.1	Ribosomal protein L6 family protein
30314786	Pavir.J32738.1	2289	2	-0.167637	0.8903	0.0714	0.1665	secondary metabolism.phenylpropanoids.lignin biosynthesis.CAD	AT1G72680.1	cinnamyl-alcohol dehydrogenase
30228581	Pavir.Ea02439.1	1928	4	-0.167637	0.8903	0.1989	0.354	lipid metabolism.'exotics' (steroids. squalene etc).sphingolipids.ceramidase	AT2G38010.1	Neutral/alkaline non-lysosomal ceramidase
30308230	Pavir.J29331.1	4535	3	-0.167637	0.8903	0.1448	0.2845	N/A	AT2G27290.1	Protein of unknown function (DUF1279)
30191805	Pavir.Da00086.1	1081	5	-0.167312	0.8905	0.0822	0.1857	protein.synthesis.ribosomal protein.eukaryotic.40S subunit.S14	AT3G52580.1	Ribosomal protein S11 family protein
30224595	Pavir.Gb00331.1	5207	1	-0.16715	0.8906	0.4383	0.6043	N/A	AT1G59840.1	cofactor assembly of complex C
30314585	Pavir.J09907.1	4083	2	-0.16715	0.8906	0.5036	0.6619	N/A	AT1G09310.1	Protein of unknown function, DUF538
30235492	Pavir.Ab02318.1	5155	1	-0.166827	0.8908	0.5962	0.7408	redox.glutaredoxins	AT5G40370.1	Glutaredoxin family protein
30251518	Pavir.Aa00967.1	3519	3	-0.166827	0.8908	0.2533	0.4177	N/A	AT5G41970.1	Metal-dependent protein hydrolase
30255119	Pavir.J24314.1	2808	7	-0.166665	0.8909	0.4372	0.6035	N/A	AT2G44300.1	Bifunctional inhibitor/lipid-transfer protein/seed storage 2S albumin superfamily protein
30290442	Pavir.Ba00913.1	492	12	-0.166503	0.891	0.0168	0.0529	TCA / org transformation.other organic acid transformatons.malic	AT2G13560.1	NAD-dependent malic enzyme 1
30211819	Pavir.Ia03498.1	1819	12	-0.166503	0.891	0.0014	0.0066	N/A	AT5G46790.1	PYR1-like 1
30210205	Pavir.Ia01243.1	435	23	-0.166017	0.8913	0.0026	0.0112	N/A	AT3G04610.1	RNA-binding KH domain-containing protein
30230773	Pavir.Ea03479.1	4522	3	-0.165855	0.8914	0.3051	0.4732	development.unspecified	AT4G21150.1	ribophorin II (RPN2) family protein
30204487	Pavir.Ca00886.1	1620	18	-0.165693	0.8915	0.0137	0.0448	signalling.G-proteins	AT5G42080.1	dynamin-like protein
30253770	Pavir.Aa02718.1	459	33	-0.165693	0.8915	<.0001	<.0001	protein.synthesis.ribosomal protein.prokaryotic.chloroplast.50S subunit.L21	AT1G35680.1	Ribosomal protein L21
30210260	Pavir.Ia04265.1	5505	1	-0.16537	0.8917	0.3831	0.5509	stress.abiotic.heat	AT5G04890.1	HSP20-like chaperones superfamily protein
30250107	Pavir.Aa02608.1	3957	3	-0.165208	0.8918	0.2813	0.4484	N/A	N/A	N/A
30299044	Pavir.Bb00543.1	2064	10	-0.165046	0.8919	0.0664	0.1586	amino acid metabolism.degradation.branched chain group.valine	AT2G14170.1	aldehyde dehydrogenase 6B2
30256716	Pavir.J31382.1	1292	17	-0.165046	0.8919	0.0005	0.0027	misc.acid and other phosphatases	AT4G29260.1	HAD superfamily, subfamily IIIB acid phosphatase
30281277	Pavir.Fb01324.1	4510	2	-0.164884	0.892	0.4178	0.5841	protein.postranslational modification	AT2G24765.1	ADP-ribosylation factor 3
30206199	Pavir.Ca02032.1	911	3	-0.164884	0.892	0.3468	0.5154	N/A	AT1G09340.1	chloroplast RNA binding
30233861	Pavir.Ab01929.1	2415	12	-0.164884	0.892	0.0305	0.0867	protein.synthesis.ribosome biogenesis.Pre-rRNA processing and modifications.DExD-box helicases	AT3G19760.1	eukaryotic initiation factor 4A-III
30224754	Pavir.Gb00109.1	843	9	-0.164884	0.892	0.037	0.1008	N/A	AT3G58010.1	plastoglobulin 34kD
30305328	Pavir.Ga01803.1	5624	1	-0.164723	0.8921	0.736	0.8381	N/A	N/A	N/A
30243162	Pavir.J17426.1	2747	7	-0.164723	0.8921	0.1002	0.2153	signalling.calcium	AT1G65540.1	LETM1-like protein
30274494	Pavir.J16784.1	73	127	-0.164723	0.8921	<.0001	<.0001	N/A	AT2G32240.1	N/A
30206830	Pavir.Ca00145.1	3954	2	-0.164561	0.8922	0.6821	0.8001	not assigned.no ontology	AT3G48410.1	alpha/beta-Hydrolases superfamily protein
30318487	Pavir.Ha00989.1	365	13	-0.164561	0.8922	0.1061	0.2249	PS.lightreaction.photosystem II.LHC-II	AT4G10340.1	light harvesting complex of photosystem II 5
30275542	Pavir.J40146.1	1667	22	-0.164561	0.8922	0.0015	0.007	N/A	AT4G26410.1	Uncharacterised conserved protein UCP022280
30282066	Pavir.J07080.1	3969	2	-0.164399	0.8923	0.0634	0.153	N/A	AT4G25020.1	D111/G-patch domain-containing protein
30264002	Pavir.J01284.1	2233	9	-0.164238	0.8924	0.0787	0.1795	N/A	AT5G49830.1	exocyst complex component 84B
30202651	Pavir.J33948.1	1748	9	-0.163914	0.8926	0.0061	0.023	RNA.regulation of transcription.Trihelix Triple-Helix transcription factor family	AT3G14180.1	sequence-specific DNA binding transcription factors
30304714	Pavir.Ga01102.1	3444	1	-0.163753	0.8927	0.6423	0.773	protein.degradation	AT4G17510.1	ubiquitin C-terminal hydrolase 3
30315947	Pavir.J07068.1	2400	13	-0.163753	0.8927	0.0579	0.1428	signalling.G-proteins	AT2G03150.1	ATP/GTP-binding protein family
30309322	Pavir.Eb03945.1	4833	1	-0.163429	0.8929	0.3717	0.5394	mitochondrial electron transport / ATP synthesis.NADH-DH.complex I	AT3G27890.1	NADPH:quinone oxidoreductase
30237140	Pavir.Ib00209.1	2459	5	-0.163106	0.8931	0.0467	0.1214	N/A	AT2G20920.1	Protein of unknown function (DUF3353)
30224387	Pavir.Gb01269.1	4124	2	-0.163106	0.8931	0.3777	0.5455	N/A	AT4G17940.1	Tetratricopeptide repeat (TPR)-like superfamily protein
30297831	Pavir.Bb00754.1	3542	1	-0.162945	0.8932	0.6484	0.7778	protein.targeting.secretory pathway.plasma membrane	AT2G30050.1	transducin family protein / WD-40 repeat family protein
30266123	Pavir.Hb01924.1	3926	2	-0.162622	0.8934	0.2234	0.3841	glycolysis.unclear/dually targeted.phosphoglycerate mutase	AT5G22620.1	phosphoglycerate/bisphosphoglycerate mutase family protein
30300653	Pavir.Bb02610.1	3059	4	-0.162299	0.8936	0.1597	0.3049	RNA.regulation of transcription.General Transcription	AT4G37740.1	growth-regulating factor 2
30220532	Pavir.J03259.1	3697	2	-0.162299	0.8936	0.3045	0.4726	signalling.G-proteins	AT3G59920.1	RAB GDP dissociation inhibitor 2
30186026	Pavir.Fa01900.1	5403	1	-0.162137	0.8937	0.6709	0.7937	misc.nitrilases *nitrile lyases berberine bridge enzymes reticuline oxidases troponine reductases	AT1G30760.1	FAD-binding Berberine family protein
30244705	Pavir.J07009.1	5090	2	-0.162137	0.8937	0.4907	0.6526	protein.degradation.ubiquitin.E1	AT2G30110.1	ubiquitin-activating enzyme 1
30217042	Pavir.J37384.1	2522	14	-0.161492	0.8941	0.0047	0.0186	N/A	AT2G26570.1	Plant protein of unknown function (DUF827)
30239351	Pavir.Ib01441.1	3705	4	-0.161492	0.8941	0.1124	0.2349	N/A	AT2G47390.1	Prolyl oligopeptidase family protein
30203723	Pavir.Ca00340.1	2772	10	-0.161169	0.8943	0.0026	0.0112	RNA.regulation of transcription.zf-HD	AT2G02540.1	homeobox protein 21
30197114	Pavir.J23987.1	3835	3	-0.161169	0.8943	0.5609	0.7112	not assigned.no ontology	AT5G52970.1	thylakoid lumen 15.0 kDa protein
30219643	Pavir.J12238.1	90	44	-0.160685	0.8946	<.0001	<.0001	TCA / org transformation.TCA.malate DH	AT3G15020.1	Lactate/malate dehydrogenase family protein
30293894	Pavir.Ba00444.1	215	2	-0.160685	0.8946	0.2437	0.4074	N/A	AT2G04039.1	N/A
30193066	Pavir.Da00090.1	2032	11	-0.160524	0.8947	0.0245	0.0724	protein.synthesis.ribosomal protein.prokaryotic.chloroplast.50S subunit.L24	AT5G54600.1	Translation protein SH3-like family protein
30207070	Pavir.Ca00450.1	3230	3	-0.160524	0.8947	0.1587	0.3037	N/A	AT5G11390.1	WPP domain-interacting protein 1
30208262	Pavir.J37928.1	1368	20	-0.160363	0.8948	0.0139	0.0453	stress.abiotic	AT3G47860.1	chloroplastic lipocalin
30265661	Pavir.Hb01614.1	2609	6	-0.160363	0.8948	0.5401	0.6928	protein.degradation.cysteine protease	AT1G02305.1	Cysteine proteinases superfamily protein
30312877	Pavir.Eb00933.1	1605	22	-0.160363	0.8948	0.003	0.0126	RNA.regulation of transcription.unclassified	AT2G32080.1	purin-rich alpha 1
30300696	Pavir.Bb02929.1	819	1	-0.160202	0.8949	0.3279	0.497	DNA.synthesis/chromatin structure.histone.core.H2A	AT1G51060.1	histone H2A 10
30224370	Pavir.Gb01663.1	694	48	-0.16004	0.895	<.0001	<.0001	N/A	AT1G36390.1	Co-chaperone GrpE family protein
30204537	Pavir.Ca02859.1	392	40	-0.159879	0.8951	<.0001	<.0001	RNA.regulation of transcription.Methyl binding domain proteins	AT1G15340.1	methyl-CPG-binding domain 10
30233940	Pavir.Ab01757.1	2970	5	-0.159879	0.8951	0.0892	0.1968	N/A	AT1G27385.3	N/A
30238174	Pavir.Ib02646.1	1304	23	-0.159718	0.8952	0.002	0.009	misc.peroxidases	AT5G06720.1	peroxidase 2
30215635	Pavir.Ia00831.1	2203	6	-0.159557	0.8953	0.1444	0.2838	cell.organisation	AT3G26070.1	Plastid-lipid associated protein PAP / fibrillin family protein
30270446	Pavir.J05594.1	1324	7	-0.159235	0.8955	0.0706	0.1653	not assigned.no ontology	AT4G22360.1	SWIB complex BAF60b domain-containing protein
30249110	Pavir.Aa01015.1	2021	10	-0.159074	0.8956	0.0671	0.1599	protein.degradation.AAA type	AT5G16930.1	AAA-type ATPase family protein
30273215	Pavir.J04127.1	4352	3	-0.159074	0.8956	0.3019	0.4694	RNA.processing	AT2G23930.1	probable small nuclear ribonucleoprotein G
30272544	Pavir.J10315.1	5166	1	-0.158751	0.8958	0.4684	0.6314	N/A	AT3G62800.1	double-stranded-RNA-binding protein 4
30309284	Pavir.Eb01690.1	5247	1	-0.158751	0.8958	0.5953	0.7402	RNA.regulation of transcription.unclassified	AT3G18580.1	Nucleic acid-binding, OB-fold-like protein
30317693	Pavir.Ha00632.1	5131	1	-0.158429	0.896	0.5597	0.71	protein.degradation	AT2G43210.1	Ubiquitin-like superfamily protein
30252561	Pavir.Aa01425.1	5527	1	-0.158268	0.8961	0.5948	0.7398	protein.postranslational modification	AT3G25250.1	AGC (cAMP-dependent, cGMP-dependent and protein kinase C) kinase family protein
30233310	Pavir.Ab00940.1	2579	5	-0.158268	0.8961	0.0207	0.0627	protein.targeting.chloroplast	AT3G24590.1	plastidic type i signal peptidase 1
30283958	Pavir.J11680.1	450	65	-0.158107	0.8962	<.0001	<.0001	N/A	AT1G67280.1	Glyoxalase/Bleomycin resistance protein/Dioxygenase superfamily protein
30218428	Pavir.J40359.1	727	3	-0.158107	0.8962	0.2545	0.4188	N/A	AT1G32220.1	NAD(P)-binding Rossmann-fold superfamily protein
30268584	Pavir.Cb01964.1	461	1	-0.157946	0.8963	0.7851	0.8702	PS.photorespiration.glycine cleavage.H protein	AT1G32470.1	Single hybrid motif superfamily protein
30262684	Pavir.Db00800.1	188	19	-0.157785	0.8964	0.0029	0.0123	PS.calvin cycle.aldolase	AT4G26530.1	Aldolase superfamily protein
30192014	Pavir.Da02382.1	2113	11	-0.157785	0.8964	0.0673	0.1601	stress.abiotic.unspecified	AT1G01170.1	Protein of unknown function (DUF1138)
30301767	Pavir.J00531.1	3966	3	-0.157785	0.8964	0.4914	0.6531	DNA.synthesis/chromatin structure	AT5G16270.1	sister chromatid cohesion 1 protein 4
30300379	Pavir.Bb01469.1	1853	19	-0.157464	0.8966	0.0031	0.013	N/A	AT5G51410.1	LUC7 N_terminus domain-containing protein
30313092	Pavir.Eb00322.1	2799	16	-0.157303	0.8967	0.0252	0.0739	not assigned.no ontology	AT3G62160.1	HXXXD-type acyl-transferase family protein
30302474	Pavir.Ga02230.1	5234	1	-0.15682	0.897	0.1043	0.2222	misc.nitrilases *nitrile lyases berberine bridge enzymes reticuline oxidases troponine reductases	AT4G34880.1	Amidase family protein
30229353	Pavir.Ea02379.1	3392	3	-0.156659	0.8971	0.3081	0.4761	protein.synthesis.ribosomal protein.prokaryotic.chloroplast.30S subunit.S20	AT3G15190.1	chloroplast 30S ribosomal protein S20, putative
30201445	Pavir.J26747.1	3049	8	-0.156659	0.8971	0.1609	0.3067	N/A	N/A	N/A
30189287	Pavir.J07101.1	953	5	-0.156498	0.8972	0.059	0.1449	protein.synthesis.ribosomal protein.eukaryotic.60S subunit.L7	AT2G44120.2	Ribosomal protein L30/L7 family protein
30269342	Pavir.Cb00840.1	2155	16	-0.156498	0.8972	0.0002	0.0012	N/A	AT5G64180.1	N/A
30295103	Pavir.J09862.1	589	32	-0.156498	0.8972	0.007	0.0257	N/A	N/A	N/A
30306674	Pavir.J40836.1	5171	1	-0.156177	0.8974	0.6361	0.77	N/A	N/A	N/A
30260150	Pavir.Db00603.1	351	10	-0.156016	0.8975	0.0595	0.1457	N/A	AT5G45680.1	FK506-binding protein 13
30302644	Pavir.Ga01500.1	5378	1	-0.155855	0.8976	0.5987	0.7428	misc.short chain dehydrogenase/reductase (SDR)	AT3G59710.1	NAD(P)-binding Rossmann-fold superfamily protein
30188253	Pavir.Fa01340.1	3715	3	-0.155695	0.8977	0.3088	0.4769	RNA.regulation of transcription.WRKY domain transcription factor family	AT1G13960.1	WRKY DNA-binding protein 4
30309873	Pavir.Eb00979.1	5338	1	-0.155534	0.8978	0.6917	0.8077	protein.synthesis.ribosomal protein.prokaryotic.chloroplast.50S subunit.L3	AT3G17465.1	ribosomal protein L3 plastid
30197682	Pavir.J34601.1	4358	5	-0.155534	0.8978	0.0961	0.2085	N/A	AT1G14300.1	ARM repeat superfamily protein
30283341	Pavir.J37812.1	3287	3	-0.155534	0.8978	0.1398	0.2775	N/A	AT5G11390.1	WPP domain-interacting protein 1
30231416	Pavir.Ea04020.1	3384	4	-0.155373	0.8979	0.3758	0.5438	misc.beta 1 3 glucan hydrolases.glucan endo-1 3-beta-glucosidase	AT4G16260.1	Glycosyl hydrolase superfamily protein
30221560	Pavir.Gb01532.1	5065	2	-0.155373	0.8979	0.2072	0.3641	not assigned.no ontology	AT1G69680.1	Mog1/PsbP/DUF1795-like photosystem II reaction center PsbP family protein
30194688	Pavir.Da00791.1	4314	4	-0.155213	0.898	0.0499	0.1273	misc.acid and other phosphatases	AT4G29260.1	HAD superfamily, subfamily IIIB acid phosphatase
30208586	Pavir.J01133.1	4832	2	-0.155052	0.8981	0.3306	0.5001	secondary metabolism.simple phenols	AT3G09220.1	laccase 7
30235100	Pavir.Ab02251.1	2779	6	-0.155052	0.8981	0.2455	0.4093	N/A	AT5G48335.1	N/A
30197377	Pavir.J15560.1	1553	1	-0.154891	0.8982	0.3284	0.4976	hormone metabolism.abscisic acid.synthesis-degradation.synthesis.short chain alcohol dehydrogenmase (ABA2)	AT1G52340.1	NAD(P)-binding Rossmann-fold superfamily protein
30236369	Pavir.Ab00812.1	278	9	-0.154891	0.8982	0.0305	0.0867	N/A	AT2G25970.1	KH domain-containing protein
30208393	Pavir.J12186.1	529	25	-0.154731	0.8983	0.015	0.0479	N/A	AT3G58010.1	plastoglobulin 34kD
30252726	Pavir.Aa01037.1	672	2	-0.154731	0.8983	0.3819	0.5497	nucleotide metabolism.phosphotransfer and pyrophosphatases.misc	AT3G53620.1	pyrophosphorylase 4
30280269	Pavir.Fb00461.1	907	17	-0.15457	0.8984	0.0026	0.0112	N/A	AT2G47910.1	chlororespiratory reduction 6
30230890	Pavir.Ea01874.1	2194	1	-0.154088	0.8987	0.281	0.4482	cell.vesicle transport	AT5G39510.1	Vesicle transport v-SNARE family protein
30218406	Pavir.J27616.1	4919	1	-0.153928	0.8988	0.5999	0.7438	not assigned.no ontology	AT1G33980.1	Smg-4/UPF3 family protein
30196819	Pavir.J38509.1	148	106	-0.153928	0.8988	<.0001	<.0001	not assigned.no ontology.pentatricopeptide (PPR) repeat-containing protein	AT1G12250.1	Pentapeptide repeat-containing protein
30251188	Pavir.Aa02760.1	277	8	-0.153767	0.8989	0.0309	0.0874	amino acid metabolism.synthesis.central amino acid metabolism.aspartate.aspartate aminotransferase	AT2G30970.1	aspartate aminotransferase 1
30186809	Pavir.Fa00219.1	1091	4	-0.153607	0.899	0.1307	0.2651	not assigned.no ontology	AT5G09390.1	CD2-binding protein-related
30276974	Pavir.J11388.1	2709	7	-0.153607	0.899	0.0476	0.1228	redox.dismutases and catalases	AT5G18100.1	copper/zinc superoxide dismutase 3
30206124	Pavir.Ca00433.1	364	81	-0.153447	0.8991	<.0001	<.0001	PS.lightreaction.photosystem I.PSI polypeptide subunits	AT5G64040.1	photosystem I reaction center subunit PSI-N, chloroplast, putative / PSI-N, putative (PSAN)
30192478	Pavir.Da02275.1	136	14	-0.153286	0.8992	0.0502	0.1279	glycolysis.cytosolic branch.enolase	AT2G36530.1	Enolase
30247021	Pavir.J16560.1	2433	9	-0.153126	0.8993	0.0324	0.0908	N/A	AT1G50900.1	Ankyrin repeat family protein
30203757	Pavir.Ca00351.1	1029	4	-0.152644	0.8996	0.1693	0.317	cell wall.precursor synthesis.KDO pathway.KDO-8-Phosphate Synthase	AT1G79500.1	Aldolase-type TIM barrel family protein
30238055	Pavir.Ib00492.1	2842	7	-0.152644	0.8996	0.0025	0.0109	DNA.synthesis/chromatin structure	AT2G26280.1	CTC-interacting domain 7
30246389	Pavir.J00654.1	1736	14	-0.152644	0.8996	0.0385	0.1043	nucleotide metabolism.phosphotransfer and pyrophosphatases.misc	AT3G53620.1	pyrophosphorylase 4
30193558	Pavir.Da00246.1	3521	4	-0.152484	0.8997	0.3482	0.5165	misc.acid and other phosphatases	AT5G34850.1	purple acid phosphatase 26
30266572	Pavir.Hb00470.1	3170	1	-0.152163	0.8999	0.3403	0.5093	N/A	AT5G13700.1	polyamine oxidase 1
30195588	Pavir.J02938.1	3792	5	-0.152163	0.8999	0.1286	0.2617	N/A	N/A	N/A
30290748	Pavir.Ba01224.1	3724	4	-0.152003	0.9	0.0345	0.0954	signalling.light	AT2G21150.1	XAP5 family protein
30269168	Pavir.Cb01114.1	5136	1	-0.151843	0.9001	0.6858	0.8033	not assigned.no ontology	AT3G51730.1	saposin B domain-containing protein
30305806	Pavir.Ga02204.1	4838	2	-0.151843	0.9001	0.313	0.4817	not assigned.no ontology	AT5G26610.1	D111/G-patch domain-containing protein
30289975	Pavir.Ba03996.1	155	2	-0.151843	0.9001	0.5474	0.6993	PS.lightreaction.photosystem II.PSII polypeptide subunits	AT3G01440.1	PsbQ-like 1
30264827	Pavir.Hb00620.1	5543	1	-0.151683	0.9002	0.6722	0.7939	DNA.synthesis/chromatin structure	AT5G22010.1	replication factor C1
30253906	Pavir.Aa00677.1	4199	7	-0.151683	0.9002	0.0006	0.0032	N/A	AT5G56140.1	RNA-binding KH domain-containing protein
30262033	Pavir.Db00122.1	4255	2	-0.151683	0.9002	0.4586	0.6234	N/A	AT5G35080.1	N/A
30238750	Pavir.Ib04158.1	902	1	-0.151522	0.9003	0.5535	0.7046	amino acid metabolism.synthesis.aspartate family.methionine	AT5G17920.1	Cobalamin-independent synthase family protein
30187548	Pavir.Fa00467.1	2329	14	-0.151522	0.9003	0.0044	0.0176	misc.peroxidases	AT4G32320.1	ascorbate peroxidase 6
30303245	Pavir.Ga01445.1	152	18	-0.151522	0.9003	0.0035	0.0144	signalling.14-3-3 proteins	AT3G02520.1	general regulatory factor 7
30192995	Pavir.Da01209.1	2399	12	-0.151202	0.9005	0.0333	0.0928	glycolysis.cytosolic branch.pyrophosphate-fructose-6-P phosphotransferase	AT1G12000.1	Phosphofructokinase family protein
30316909	Pavir.Ha00023.1	2813	7	-0.151202	0.9005	0.0197	0.0602	protein.synthesis.ribosomal protein.eukaryotic.60S subunit.L19	AT1G02780.1	Ribosomal protein L19e family protein
30190514	Pavir.J05875.1	310	9	-0.151202	0.9005	0.0557	0.139	C1-metabolism.glycine hydroxymethyltransferase	AT4G37930.1	serine transhydroxymethyltransferase 1
30198761	Pavir.J41117.1	2468	6	-0.151042	0.9006	0.1703	0.3182	misc.peroxidases	AT5G06730.1	Peroxidase superfamily protein
30277034	Pavir.J38817.1	873	10	-0.151042	0.9006	0.0165	0.052	RNA.transcription	AT4G13670.1	plastid transcriptionally active 5
30317146	Pavir.Ha00298.1	655	2	-0.151042	0.9006	0.2692	0.4354	RNA.processing.splicing	AT1G60900.1	U2 snRNP auxilliary factor, large subunit, splicing factor
30242987	Pavir.Ib00725.1	3537	1	-0.150881	0.9007	0.1272	0.2592	RNA.regulation of transcription.unclassified	AT1G13920.1	Remorin family protein
30211131	Pavir.Ia00027.1	3482	3	-0.150881	0.9007	0.3017	0.4693	cell.division.plastid	AT1G24490.1	OxaA/YidC-like membrane insertion protein
30275748	Pavir.J20802.1	3108	5	-0.150881	0.9007	0.2007	0.3565	protein.synthesis.ribosomal protein.eukaryotic.60S subunit.L27A	AT1G70600.1	Ribosomal protein L18e/L15 superfamily protein
30236128	Pavir.Ab03030.1	3044	6	-0.150881	0.9007	0.1001	0.2151	major CHO metabolism.degradation.sucrose.misc	AT4G26620.1	Sucrase/ferredoxin-like family protein
30237665	Pavir.Ib03430.1	1399	6	-0.150721	0.9008	0.0969	0.2098	redox.ascorbate and glutathione.ascorbate.GME	AT5G28840.1	GDP-D-mannose 3\',5\'-epimerase
30308858	Pavir.Eb00043.1	4758	1	-0.150561	0.9009	0.4091	0.5756	redox.glutaredoxins	AT1G64500.1	Glutaredoxin family protein
30198829	Pavir.J36187.1	3342	6	-0.150401	0.901	0.1346	0.2702	N/A	N/A	N/A
30189721	Pavir.J15638.1	1857	13	-0.150241	0.9011	0.0006	0.0032	RNA.regulation of transcription.zf-HD	AT2G02540.1	homeobox protein 21
30202465	Pavir.J18463.1	2890	6	-0.149921	0.9013	0.2559	0.4204	not assigned.no ontology	AT4G34480.1	O-Glycosyl hydrolases family 17 protein
30253578	Pavir.Aa00741.1	3881	1	-0.149761	0.9014	0.465	0.6287	misc.dynamin	AT1G10290.1	dynamin-like protein 6
30269377	Pavir.Cb02026.1	5005	1	-0.149761	0.9014	0.5525	0.704	RNA.regulation of transcription.Trihelix Triple-Helix transcription factor family	AT1G21200.1	sequence-specific DNA binding transcription factors
30309449	Pavir.Eb00699.1	647	42	-0.149761	0.9014	<.0001	<.0001	not assigned.no ontology	AT2G01190.1	Octicosapeptide/Phox/Bem1p family protein
30290596	Pavir.Ba01374.1	806	28	-0.149441	0.9016	0.0853	0.191	PS.lightreaction.photosystem II.LHC-II	AT2G34420.1	photosystem II light harvesting complex gene B1B2
30305583	Pavir.Ga01811.1	3877	2	-0.149281	0.9017	0.3671	0.5346	nucleotide metabolism.synthesis.purine.GAR transformylase	AT1G31220.1	Formyl transferase
30197546	Pavir.J00717.1	4506	1	-0.149121	0.9018	0.52	0.6763	protein.postranslational modification	AT5G01920.1	Protein kinase superfamily protein
30301739	Pavir.J01843.1	3431	2	-0.149121	0.9018	0.3703	0.5377	protein.degradation.serine protease	AT2G47940.1	DEGP protease 2
30317838	Pavir.Ha01431.1	1151	10	-0.149121	0.9018	0.0766	0.1756	misc.gluco- galacto- and mannosidases.alpha-mannosidase	AT5G13980.1	Glycosyl hydrolase family 38 protein
30279890	Pavir.Fb01634.1	1841	24	-0.149121	0.9018	0.0005	0.0027	transport.misc	AT5G58070.1	temperature-induced lipocalin
30290875	Pavir.Ba01958.1	3602	5	-0.149121	0.9018	0.329	0.498	misc.oxidases - copper flavone etc	AT2G32300.1	uclacyanin 1
30312931	Pavir.Eb00503.1	2208	8	-0.149121	0.9018	0.1279	0.2605	N/A	AT3G27750.1	N/A
30310102	Pavir.Eb00821.1	951	12	-0.148961	0.9019	0.0004	0.0022	cell.cycle.peptidylprolyl isomerase	AT1G74070.1	Cyclophilin-like peptidyl-prolyl cis-trans isomerase family protein
30218940	Pavir.J07417.1	5307	1	-0.148801	0.902	0.2905	0.4579	protein.postranslational modification	AT1G72710.1	casein kinase 1-like protein 2
30267322	Pavir.J02586.1	3544	2	-0.148801	0.902	0.3694	0.5369	N/A	AT4G03110.1	RNA-binding protein-defense related 1
30267812	Pavir.Cb00043.1	927	15	-0.148641	0.9021	0.0495	0.1263	protein.degradation	AT4G18370.1	DEGP protease 5
30202068	Pavir.J18067.1	1319	4	-0.148641	0.9021	0.1204	0.2479	protein.synthesis.ribosomal protein.eukaryotic.60S subunit.L7	AT2G44120.2	Ribosomal protein L30/L7 family protein
30248493	Pavir.J15811.1	1977	1	-0.148161	0.9024	0.5469	0.699	N/A	AT4G34490.1	cyclase associated protein 1
30202206	Pavir.J29307.1	4664	3	-0.148161	0.9024	0.385	0.5526	N/A	AT1G52220.1	N/A
30208640	Pavir.J25495.1	4530	3	-0.148001	0.9025	0.1221	0.2505	N/A	AT1G07280.1	Tetratricopeptide repeat (TPR)-like superfamily protein
30253413	Pavir.Aa03088.1	1854	10	-0.148001	0.9025	0.0358	0.0983	not assigned.no ontology	AT1G67170.1	N/A
30229065	Pavir.Ea02874.1	1469	14	-0.147841	0.9026	0.0189	0.0583	protein.synthesis.ribosomal protein.prokaryotic.chloroplast.50S subunit.L13	AT1G78630.1	Ribosomal protein L13 family protein
30303850	Pavir.Ga01506.1	4784	1	-0.147681	0.9027	0.4369	0.6033	N/A	AT2G43540.1	N/A
30286789	Pavir.J33742.1	307	6	-0.147522	0.9028	0.2185	0.3783	PS.lightreaction.photosystem II.PSII polypeptide subunits	AT1G44575.1	Chlorophyll A-B binding family protein
30309691	Pavir.Eb00061.1	4461	5	-0.147362	0.9029	0.2421	0.4058	misc.aminotransferases.aminotransferase class IV family protein	AT5G57850.1	D-aminoacid aminotransferase-like PLP-dependent enzymes superfamily protein
30207236	Pavir.J10015.1	1373	4	-0.147362	0.9029	0.1175	0.2436	major CHO metabolism.degradation.sucrose.fructokinase	AT1G66430.1	pfkB-like carbohydrate kinase family protein
30242972	Pavir.Ib01560.1	104	1	-0.147202	0.903	0.5746	0.7233	PS.lightreaction.photosystem II.PSII polypeptide subunits	AT1G03600.1	photosystem II family protein
30308342	Pavir.J18516.1	3754	3	-0.147202	0.903	0.246	0.4096	protein.synthesis.ribosomal protein.eukaryotic.60S subunit.L27A	AT1G70600.1	Ribosomal protein L18e/L15 superfamily protein
30264171	Pavir.Hb00019.1	4321	1	-0.147042	0.9031	0.5392	0.6919	lipid metabolism.lipid degradation.beta-oxidation.acyl-CoA thioesterase	AT2G29590.1	Thioesterase superfamily protein
30231501	Pavir.Ea00455.1	3377	2	-0.147042	0.9031	0.1536	0.2974	protein.degradation.serine protease	AT2G35780.1	serine carboxypeptidase-like 26
30202083	Pavir.J00981.1	124	12	-0.146883	0.9032	0.0472	0.1221	protein.degradation	AT2G24200.1	Cytosol aminopeptidase family protein
30303236	Pavir.Ga01889.1	4402	2	-0.146723	0.9033	0.3395	0.5084	stress.biotic	AT3G44220.1	Late embryogenesis abundant (LEA) hydroxyproline-rich glycoprotein family
30271048	Pavir.J12693.1	2853	11	-0.146723	0.9033	0.0257	0.0753	protein.targeting.chloroplast	AT5G19620.1	outer envelope protein of 80 kDa
30230383	Pavir.Ea00208.1	2949	9	-0.146723	0.9033	0.1363	0.2727	protein.synthesis.ribosomal protein.eukaryotic.60S subunit.L11	AT3G58700.1	Ribosomal L5P family protein
30301680	Pavir.Bb01208.1	669	34	-0.146563	0.9034	<.0001	<.0001	RNA.regulation of transcription.unclassified	AT3G63140.1	chloroplast stem-loop binding protein of 41 kDa
30231299	Pavir.Ea04039.1	5249	1	-0.146084	0.9037	0.6185	0.7578	nucleotide metabolism.synthesis.pyrimidine.orotate phosphoribosyltransferase	AT3G54470.1	uridine 5\'-monophosphate synthase / UMP synthase (PYRE-F) (UMPS)
30300034	Pavir.Bb02751.1	2131	8	-0.146084	0.9037	0.0945	0.2058	RNA.processing	AT2G25290.1	Octicosapeptide/Phox/Bem1p (PB1) domain-containing protein / tetratricopeptide repeat (TPR)-containing protein
30262064	Pavir.Db02317.1	256	12	-0.146084	0.9037	0.0748	0.1721	PS.calvin cycle.transketolase	AT2G45290.1	Transketolase
30230276	Pavir.Ea00089.1	989	14	-0.145925	0.9038	0.1017	0.2178	PS.photorespiration.hydroxypyruvate reductase	AT1G79870.1	D-isomer specific 2-hydroxyacid dehydrogenase family protein
30279292	Pavir.Fb01175.1	4258	3	-0.145925	0.9038	0.2848	0.4524	N/A	AT5G20090.1	Uncharacterised protein family (UPF0041)
30286046	Pavir.J17347.1	289	26	-0.145765	0.9039	0.0002	0.0012	protein.degradation.serine protease	AT3G27925.1	DegP protease 1
30204204	Pavir.Ca00413.1	1799	2	-0.145605	0.904	0.3265	0.4952	RNA.regulation of transcription.SET-domain transcriptional regulator family	AT5G14260.1	Rubisco methyltransferase family protein
30312115	Pavir.Eb01077.1	5372	1	-0.145127	0.9043	0.5205	0.6764	N/A	AT3G09180.1	N/A
30230105	Pavir.Ea02757.1	3505	5	-0.145127	0.9043	0.1218	0.2502	N/A	AT5G46250.1	RNA-binding protein
30186746	Pavir.Fa01762.1	3148	5	-0.144967	0.9044	0.1829	0.3343	N/A	AT3G13060.2	evolutionarily conserved C-terminal region 5
30195630	Pavir.J17829.1	4179	4	-0.144967	0.9044	0.236	0.3993	N/A	AT3G52860.1	N/A
30291937	Pavir.Ba02604.1	377	11	-0.144808	0.9045	0.0196	0.0599	N/A	AT4G24770.1	31-kDa RNA binding protein
30213433	Pavir.Ia01436.1	2055	16	-0.144808	0.9045	0.0685	0.162	cell wall.cell wall proteins.RGP	AT5G15650.1	reversibly glycosylated polypeptide 2
30255467	Pavir.J03648.1	1049	8	-0.144648	0.9046	0.1941	0.3483	mitochondrial electron transport / ATP synthesis.NADH-DH.localisation not clear	AT2G20360.1	NAD(P)-binding Rossmann-fold superfamily protein
30285409	Pavir.J21876.1	1088	9	-0.144648	0.9046	0.1991	0.3542	N/A	AT5G13700.1	polyamine oxidase 1
30221422	Pavir.Gb01602.1	3603	6	-0.144489	0.9047	0.1287	0.2618	hormone metabolism.jasmonate.synthesis-degradation.12-Oxo-PDA-reductase	AT1G76690.1	12-oxophytodienoate reductase 2
30266272	Pavir.Hb00912.1	2597	7	-0.143851	0.9051	0.1353	0.271	N/A	AT3G26710.1	cofactor assembly of complex C
30199464	Pavir.J15023.1	2205	6	-0.143692	0.9052	0.1755	0.325	protein.synthesis.ribosome biogenesis.Assembly factors.misc	AT5G57120.1	N/A
30313113	Pavir.Eb02831.1	778	12	-0.143692	0.9052	0.0689	0.1626	N/A	N/A	N/A
30231979	Pavir.Ab01864.1	240	9	-0.143532	0.9053	0.4596	0.6243	redox.peroxiredoxin.BAS1	AT5G06290.1	2-cysteine peroxiredoxin B
30269198	Pavir.Cb00538.1	3541	3	-0.143532	0.9053	0.3472	0.5157	N/A	AT1G09310.1	Protein of unknown function, DUF538
30223940	Pavir.Gb00140.1	2001	20	-0.143532	0.9053	0.0014	0.0066	N/A	AT5G10010.1	N/A
30189569	Pavir.J32260.1	1811	12	-0.143213	0.9055	0.0464	0.1208	protein.degradation.ubiquitin.proteasom	AT1G21720.1	proteasome beta subunit C1
30302280	Pavir.Ga00928.1	1969	7	-0.142895	0.9057	0.0304	0.0865	not assigned.no ontology	AT4G11790.1	Pleckstrin homology (PH) domain superfamily protein
30242821	Pavir.Ib00081.1	2638	6	-0.142895	0.9057	0.0309	0.0874	N/A	AT2G46580.1	Pyridoxamine 5\'-phosphate oxidase family protein
30290458	Pavir.Ba03642.1	1843	16	-0.142895	0.9057	0.0087	0.0309	N/A	AT5G04280.1	RNA-binding (RRM/RBD/RNP motifs) family protein with retrovirus zinc finger-like domain
30268606	Pavir.Cb00012.1	4741	1	-0.142576	0.9059	0.6227	0.7604	RNA.processing.RNA helicase	AT3G22330.1	putative mitochondrial RNA helicase 2
30206257	Pavir.Ca02020.1	1895	13	-0.142576	0.9059	0.0371	0.101	misc.gluco- galacto- and mannosidases.beta-galactosidase	AT2G32810.1	beta galactosidase 9
30247408	Pavir.J38852.1	2119	8	-0.142576	0.9059	0.0113	0.0383	N/A	AT4G29590.1	S-adenosyl-L-methionine-dependent methyltransferases superfamily protein
30213308	Pavir.Ia00646.1	323	7	-0.142417	0.906	0.0883	0.1958	not assigned.no ontology	AT5G10860.1	Cystathionine beta-synthase (CBS) family protein
30212453	Pavir.Ia00971.1	1035	22	-0.142417	0.906	0.0006	0.0032	N/A	AT5G04280.1	RNA-binding (RRM/RBD/RNP motifs) family protein with retrovirus zinc finger-like domain
30305083	Pavir.Ga01819.1	4544	2	-0.142417	0.906	0.0862	0.1924	redox.thioredoxin	AT2G15570.2	Thioredoxin superfamily protein
30227936	Pavir.Ea02532.1	5325	1	-0.142099	0.9062	0.2536	0.4178	N/A	ATCG00540.1	photosynthetic electron transfer A
30314079	Pavir.Eb01095.1	4248	4	-0.142099	0.9062	0.4281	0.5938	signalling.light	AT3G26740.1	CCR-like
30194167	Pavir.Da00083.1	5401	2	-0.142099	0.9062	0.4925	0.6536	signalling.in sugar and nutrient physiology	AT1G05200.1	glutamate receptor 3.4
30227046	Pavir.Ea03597.1	3164	11	-0.141939	0.9063	0.0173	0.0542	protein.synthesis.release	AT1G33330.1	Class I peptide chain release factor
30288469	Pavir.Ba01708.1	2198	14	-0.141939	0.9063	0.0014	0.0066	not assigned.no ontology	AT5G13020.1	Emsy N Terminus (ENT)/ plant Tudor-like domains-containing protein
30300551	Pavir.Bb03060.1	799	27	-0.141939	0.9063	<.0001	<.0001	PS.lightreaction.photosystem II.LHC-II	AT5G01530.1	light harvesting complex photosystem II
30227685	Pavir.Ea00873.1	3804	2	-0.141939	0.9063	0.3023	0.4696	protein.targeting.nucleus	AT1G71480.1	Nuclear transport factor 2 (NTF2) family protein
30200876	Pavir.J41079.1	1082	19	-0.14178	0.9064	0.0146	0.0468	amino acid metabolism.synthesis.serine-glycine-cysteine group.serine.phosphoserine phosphatase	AT1G18640.2	3-phosphoserine phosphatase
[truncated: 3,496 more rows]

## Sheet: Table S1-2
Table S1-2. Proteins identified in ProteoMiner treated leaf proteome from switchgrass plants under drought treatment conditions.
Protein ID	Accessiona	Protein Hit Number	No. Peptides	Log2Ratio (T/C)b	Fold change c	t-test-P-value	FDR	Functional Pathway (MapMan) c	Annotation (A. thaliana database) d
									Accession	Descrption
30209649	Pavir.Ia00532.1	1658	2	-3.3838	0.095802	<.0001	<.0001	protein.degradation.cysteine protease	AT5G45890.1	senescence-associated gene 12
30301990	Pavir.J15315.1	979	1	-2.047	0.241987	0.0024	0.0115	N/A	AT5G08050.1	Protein of unknown function (DUF1118)
30208967	Pavir.Ia02975.1	638	1	-1.807	0.285785	0.128	0.2567	gluconeogenesis / glyoxylate cycle.pyruvate dikinase	AT4G15530.5	pyruvate orthophosphate dikinase
30302949	Pavir.Ga00675.1	4094	2	-1.7836	0.290458	0.0834	0.19	N/A	AT3G57860.1	UV-B-insensitive 4-like
30225215	Pavir.J08126.1	1705	2	-1.6707	0.314101	<.0001	<.0001	protein.degradation.cysteine protease	AT5G45890.1	senescence-associated gene 12
30231504	Pavir.Ea00263.1	4621	1	-1.61	0.327598	0.0004	0.0025	TCA / org transformation.other organic acid transformatons.malic	AT1G79750.1	NADP-malic enzyme 4
30263453	Pavir.J27655.1	1884	4	-1.5898	0.332218	<.0001	<.0001	signalling.light	AT2G30520.1	Phototropic-responsive NPH3 family protein
30240634	Pavir.Ib00587.1	3309	4	-1.4125	0.37566	<.0001	<.0001	minor CHO metabolism.myo-inositol.inositol phosphatase	AT2G22240.1	myo-inositol-1-phosphate synthase 2
30223321	Pavir.Gb00641.1	2862	1	-1.3824	0.38358	0.0022	0.0107	secondary metabolism.phenylpropanoids.lignin biosynthesis.PAL	AT2G37040.1	PHE ammonia lyase 1
30209096	Pavir.Ia03785.1	4389	1	-1.3559	0.390691	0.1989	0.3481	misc.cytochrome P450	AT2G45570.1	cytochrome P450, family 76, subfamily C, polypeptide 2
30221620	Pavir.Gb00328.1	423	14	-1.3412	0.394692	<.0001	<.0001	amino acid metabolism.degradation.aspartate family.asparagine.L-asparaginase	AT3G16150.1	N-terminal nucleophile aminohydrolases (Ntn hydrolases) superfamily protein
30311575	Pavir.Eb01684.1	4875	1	-1.3254	0.399039	0.0014	0.0073	N/A	N/A	N/A
30305852	Pavir.Ga00666.1	2899	4	-1.2226	0.42851	0.0004	0.0025	N/A	AT3G15040.1	Protein of unknown function, DUF584
30310080	Pavir.Eb03166.1	4469	1	-1.1566	0.448568	0.0705	0.1674	not assigned.no ontology	AT3G58830.1	haloacid dehalogenase (HAD) superfamily protein
30241056	Pavir.Ib01878.1	4649	1	-1.1462	0.451814	0.0624	0.1534	development.unspecified	AT4G37650.1	GRAS family transcription factor
30249592	Pavir.Aa01791.1	4318	1	-1.0717	0.475758	0.0132	0.0464	N/A	N/A	N/A
30258765	Pavir.J38423.1	3733	2	-1.038	0.487002	0.0015	0.0077	N/A	AT1G65230.1	Uncharacterized conserved protein (DUF2358)
30228858	Pavir.Ea02629.1	2654	4	-1.0293	0.489948	<.0001	<.0001	secondary metabolism.sulfur-containing.misc.alliinase	AT1G34060.1	Pyridoxal phosphate (PLP)-dependent transferases superfamily protein
30252463	Pavir.Aa00986.1	3723	1	-1.025	0.49141	0.0027	0.0127	not assigned.no ontology	AT5G16730.1	Plant protein of unknown function (DUF827)
30236951	Pavir.Ib01973.1	4082	2	-1.0044	0.498477	<.0001	<.0001	lipid metabolism.'exotics' (steroids. squalene etc).3-beta hydroxysteroid dehydrogenase/isomerase	AT1G47290.2	3beta-hydroxysteroid-dehydrogenase/decarboxylase isoform 1
30270593	Pavir.J36614.1	2419	7	-0.9845	0.505401	<.0001	<.0001	DNA.synthesis/chromatin structure.histone.H1	AT2G18050.1	histone H1-3
30256951	Pavir.J07398.1	3417	1	-0.9549	0.515877	0.0032	0.0147	signalling.light	AT2G30520.1	Phototropic-responsive NPH3 family protein
30186119	Pavir.Fa01260.1	2771	2	-0.952	0.516915	<.0001	<.0001	RNA.regulation of transcription.G2-like transcription factor family. GARP	AT1G79430.2	Homeodomain-like superfamily protein
30312427	Pavir.Eb02165.1	3626	3	-0.941	0.520872	0.0019	0.0094	RNA.regulation of transcription.MYB-related transcription factor family	AT5G53200.1	Homeodomain-like superfamily protein
30293631	Pavir.Ba03810.1	4496	1	-0.9221	0.52774	0.0062	0.0252	stress.biotic.PR-proteins	AT1G50180.1	NB-ARC domain-containing disease resistance protein
30263309	Pavir.J00252.1	4071	2	-0.9005	0.535701	<.0001	<.0001	secondary metabolism.flavonoids.flavonols.flavonol synthase (FLS)	AT5G08640.1	flavonol synthase 1
30219010	Pavir.J00249.1	443	3	-0.8986	0.536407	0.0002	0.0014	protein.synthesis.ribosomal protein.eukaryotic.40S subunit.S15	AT5G09510.1	Ribosomal protein S19 family protein
30208474	Pavir.J01110.1	4019	1	-0.8827	0.542351	0.0973	0.212	misc. other Ferredoxins and Rieske domain	AT4G25650.1	ACD1-like
30228653	Pavir.Ea02448.1	3707	1	-0.8737	0.545745	0.0007	0.0041	secondary metabolism.flavonoids.dihydroflavonols	AT4G01070.1	UDP-Glycosyltransferase superfamily protein
30198421	Pavir.J07966.1	3913	2	-0.8564	0.552329	0.0091	0.0342	N/A	AT4G32915.1	N/A
30249038	Pavir.Aa01274.1	485	5	-0.8501	0.554746	<.0001	<.0001	secondary metabolism.phenylpropanoids.lignin biosynthesis.PAL	AT2G37040.1	PHE ammonia lyase 1
30297321	Pavir.Bb03425.1	2297	1	-0.8468	0.556017	0.0313	0.0906	RNA.regulation of transcription.unclassified	AT3G53460.1	chloroplast RNA-binding protein 29
30203675	Pavir.Ca01037.1	2861	2	-0.8375	0.559612	0.0004	0.0025	nucleotide metabolism.salvage.phosphoribosyltransferases.hgprt	AT1G71750.1	Hypoxanthine-guanine phosphoribosyltransferase
30192252	Pavir.Da00491.1	3996	2	-0.8359	0.560233	0.0006	0.0035	protein.degradation	AT5G42390.1	Insulinase (Peptidase family M16) family protein
30253227	Pavir.Aa01629.1	3333	1	-0.8348	0.560661	0.0814	0.1868	RNA.regulation of transcription.Trihelix. Triple-Helix transcription factor family	AT3G14180.1	sequence-specific DNA binding transcription factors
30300823	Pavir.Bb00815.1	3408	2	-0.8322	0.561672	0.0042	0.0183	protein.degradation.AAA type	AT3G28610.1	P-loop containing nucleoside triphosphate hydrolases superfamily protein
30186418	Pavir.Fa00803.1	4098	2	-0.8307	0.562256	<.0001	<.0001	development.unspecified	AT1G56220.3	Dormancy/auxin associated family protein
30257262	Pavir.J01011.1	2095	1	-0.8252	0.564404	0.3033	0.4694	protein.synthesis.ribosomal protein.eukaryotic.40S subunit.S26	AT3G56340.1	Ribosomal protein S26e family protein
30256265	Pavir.J25534.1	858	6	-0.8231	0.565226	<.0001	<.0001	secondary metabolism.phenylpropanoids.lignin biosynthesis.PAL	AT3G53260.1	phenylalanine ammonia-lyase 2
30223458	Pavir.Gb00417.1	3752	2	-0.8066	0.571728	<.0001	<.0001	secondary metabolism.flavonoids.anthocyanins.anthocyanidin reductase	AT1G61720.1	NAD(P)-binding Rossmann-fold superfamily protein
30310685	Pavir.Eb02173.1	4182	1	-0.8013	0.573832	0.0565	0.1422	signalling.calcium	AT4G23650.1	calcium-dependent protein kinase 6
30193501	Pavir.Da01126.1	4788	2	-0.7876	0.579307	<.0001	<.0001	signalling.calcium	AT1G76650.1	calmodulin-like 38
30313819	Pavir.Eb00984.1	1548	12	-0.78637	0.579801	<.0001	<.0001	secondary metabolism.phenylpropanoids	AT4G35160.1	O-methyltransferase family protein
30305562	Pavir.Ga00312.1	3388	2	-0.7822	0.581479	0.0049	0.0208	N/A	AT4G28080.1	Tetratricopeptide repeat (TPR)-like superfamily protein
30216897	Pavir.J01603.1	4146	3	-0.7669	0.587679	0.0018	0.009	secondary metabolism.isoprenoids.carotenoids	AT1G57770.1	FAD/NAD(P)-binding oxidoreductase family protein
30220496	Pavir.J23042.1	2967	2	-0.7523	0.593656	0.0046	0.0197	misc.oxidases - copper. flavone etc	AT2G35660.1	FAD/NAD(P)-binding oxidoreductase family protein
30277864	Pavir.J05630.1	4907	1	-0.7521	0.593739	0.196	0.3454	stress.biotic	AT3G07040.1	NB-ARC domain-containing disease resistance protein
30315007	Pavir.J22911.1	2748	1	-0.7507	0.594315	0.0187	0.0613	secondary metabolism.phenylpropanoids.lignin biosynthesis.PAL	AT2G37040.1	PHE ammonia lyase 1
30198054	Pavir.J05372.1	4305	1	-0.747	0.595841	0.2362	0.3933	protein.degradation	AT1G79340.1	metacaspase 4
30261576	Pavir.Db00050.1	3319	7	-0.7426	0.597661	<.0001	<.0001	secondary metabolism.isoprenoids.carotenoids.phytoene synthase	AT5G17230.1	PHYTOENE SYNTHASE
30221953	Pavir.Gb00236.1	4272	1	-0.7408	0.598407	0.0012	0.0064	nucleotide metabolism.degradation	AT4G04955.1	allantoinase
30227401	Pavir.Ea02412.1	1690	5	-0.7403	0.598615	<.0001	<.0001	secondary metabolism.flavonoids.dihydroflavonols.dihydroflavonol 4-reductase	AT5G42800.1	dihydroflavonol 4-reductase
30234445	Pavir.Ab02771.1	1069	20	-0.73741	0.599815	<.0001	<.0001	hormone metabolism.abscisic acid.synthesis-degradation.synthesis.9-cis-epoxycarotenoid dioxygenase	AT4G19170.1	nine-cis-epoxycarotenoid dioxygenase 4
30233444	Pavir.Ab02811.1	1695	5	-0.7367	0.60011	<.0001	<.0001	mitochondrial electron transport / ATP synthesis.alternative oxidase	AT3G22370.1	alternative oxidase 1A
30203289	Pavir.Ca01377.1	4721	1	-0.7351	0.600776	0.0047	0.0201	N/A	AT1G06410.1	trehalose-phosphatase/synthase 7
30189530	Pavir.J16419.1	2223	5	-0.7345	0.601026	<.0001	<.0001	stress.abiotic.touch/wounding	AT1G19670.1	chlorophyllase 1
30293231	Pavir.Ba00063.1	4162	1	-0.7307	0.602611	0.0758	0.1766	protein.postranslational modification	AT3G06270.1	Protein phosphatase 2C family protein
30229402	Pavir.Ea02397.1	4513	1	-0.7233	0.60571	0.043	0.1153	N-metabolism.ammonia metabolism.glutamate synthase.NADH dependent	AT5G53460.1	NADH-dependent glutamate synthase 1
30244723	Pavir.J16301.1	2310	1	-0.7169	0.608403	0.0006	0.0035	amino acid metabolism.synthesis.aspartate family.methionine.homocysteine S-methyltransferase	AT2G41040.1	S-adenosyl-L-methionine-dependent methyltransferases superfamily protein
30214146	Pavir.Ia00248.1	526	1	-0.7151	0.609163	0.0216	0.0686	RNA.processing.RNA helicase	AT5G26742.1	DEAD box RNA helicase (RH3)
30250751	Pavir.Aa02671.1	4811	1	-0.7103	0.611193	0.1492	0.2848	cell.vesicle transport	AT4G32760.1	ENTH/VHS/GAT family protein
30209055	Pavir.Ia01255.1	4333	1	-0.7097	0.611447	0.0023	0.0111	development.unspecified	AT4G36860.1	LIM domain-containing protein
30274917	Pavir.J31192.1	2814	9	-0.7085	0.611956	<.0001	<.0001	DNA.synthesis/chromatin structure.histone.H1	AT1G06760.1	winged-helix DNA-binding transcription factor family protein
30209033	Pavir.Ia02573.1	2474	2	-0.7062	0.612932	0.0149	0.0512	misc.gluco-. galacto- and mannosidases.alpha-mannosidase	AT5G66150.1	Glycosyl hydrolase family 38 protein
30303545	Pavir.Ga01034.1	3189	4	-0.6951	0.617667	0.0004	0.0025	signalling.calcium	AT1G76040.2	calcium-dependent protein kinase 29
30305043	Pavir.Ga00973.1	2534	7	-0.69491	0.617748	<.0001	<.0001	N/A	AT2G46100.1	Nuclear transport factor 2 (NTF2) family protein
30239700	Pavir.Ib03894.1	2791	3	-0.69327	0.61845	<.0001	<.0001	amino acid metabolism.degradation.aspartate family.asparagine.L-asparaginase	AT5G08100.1	N-terminal nucleophile aminohydrolases (Ntn hydrolases) superfamily protein
30258095	Pavir.J28979.1	3365	1	-0.6913	0.619296	0.0419	0.1133	stress.abiotic.cold	AT5G55530.1	Calcium-dependent lipid-binding (CaLB domain) family protein
30193759	Pavir.Da01824.1	705	3	-0.6873	0.621015	<.0001	<.0001	major CHO metabolism.degradation.starch.glucan water dikinase	AT1G10760.1	Pyruvate phosphate dikinase, PEP/pyruvate binding domain
30201079	Pavir.J10420.1	4628	1	-0.687	0.621144	0.0026	0.0123	secondary metabolism.flavonoids.dihydroflavonols.flavonoid 3''-monooxygenase	AT5G07990.1	Cytochrome P450 superfamily protein
30249272	Pavir.Aa00666.1	2131	6	-0.68402	0.622428	<.0001	<.0001	RNA.regulation of transcription.unclassified	AT5G10770.1	Eukaryotic aspartyl protease family protein
30209251	Pavir.Ia00690.1	3413	3	-0.67991	0.624204	<.0001	<.0001	RNA.regulation of transcription.HB.Homeobox transcription factor family	AT2G23760.1	BEL1-like homeodomain 4
30316204	Pavir.Ha00441.1	4525	1	-0.6793	0.624468	0.0236	0.0734	signalling.G-proteins	AT5G57960.1	GTP-binding protein, HflX
30193193	Pavir.Da02179.1	3966	1	-0.6731	0.627158	0.0575	0.1443	N/A	AT1G78810.1	N/A
30230850	Pavir.Ea01021.1	4795	1	-0.6679	0.629422	0.1123	0.2335	not assigned.no ontology	AT4G05220.1	Late embryogenesis abundant (LEA) hydroxyproline-rich glycoprotein family
30204166	Pavir.Ca01518.1	2499	2	-0.6614	0.632264	0.0011	0.006	N/A	AT1G53450.1	N/A
30270940	Pavir.J34526.1	3484	2	-0.6591	0.633273	0.0014	0.0073	secondary metabolism.phenylpropanoids.lignin biosynthesis.CAD	AT4G34230.1	cinnamyl alcohol dehydrogenase 5
30266007	Pavir.Hb00269.1	3839	3	-0.6589	0.633361	<.0001	<.0001	N/A	AT1G26355.1	SPIRAL1-like1
30254906	Pavir.J01308.1	4356	1	-0.6581	0.633712	0.0247	0.0758	cell.vesicle transport	AT1G50500.1	Membrane trafficking VPS53 family protein
30213618	Pavir.Ia00568.1	4487	1	-0.6554	0.634899	0.0707	0.1677	N/A	AT1G55370.1	NDH-dependent cyclic electron flow 5
30310101	Pavir.Eb03282.1	2325	5	-0.65297	0.63597	<.0001	<.0001	N/A	AT1G16520.1	N/A
30187559	Pavir.Fa01512.1	4541	1	-0.6458	0.639138	0.1269	0.2551	RNA.regulation of transcription.CCAAT box binding factor family. DR1	AT5G08190.2	nuclear factor Y, subunit B12
30292249	Pavir.Ba00367.1	4416	1	-0.6446	0.63967	0.2894	0.4556	N/A	N/A	N/A
30188742	Pavir.Fa00568.1	4459	2	-0.6426	0.640558	0.005	0.0212	RNA.regulation of transcription.CCAAT box binding factor family. HAP5	AT1G08970.1	nuclear factor Y, subunit C9
30297743	Pavir.Bb03603.1	1269	4	-0.6387	0.642291	0.0011	0.006	misc.peroxidases	AT5G05340.1	Peroxidase superfamily protein
30300220	Pavir.Bb00586.1	2903	2	-0.6381	0.642559	0.0028	0.0131	protein.degradation.subtilases	AT4G10540.1	Subtilase family protein
30310360	Pavir.Eb01351.1	496	14	-0.63393	0.644419	<.0001	<.0001	protein.postranslational modification	AT4G27800.1	thylakoid-associated phosphatase 38
30275727	Pavir.J30520.1	3734	2	-0.6317	0.645415	0.0009	0.005	N/A	AT2G36835.1	N/A
30225509	Pavir.J38331.1	3780	3	-0.6262	0.647881	0.1054	0.2241	DNA.synthesis/chromatin structure.histone.core.H2A	AT5G02560.1	histone H2A 12
30308742	Pavir.Eb02584.1	3424	1	-0.6229	0.649364	0.0948	0.2084	RNA.transcription	AT2G15430.1	DNA-directed RNA polymerase family protein
30228185	Pavir.Ea00237.1	4697	1	-0.6224	0.649589	0.1041	0.222	cell.vesicle transport	AT1G62020.1	Coatomer, alpha subunit
30217911	Pavir.J01046.1	3603	2	-0.6218	0.64986	0.0246	0.0756	not assigned.no ontology.hydroxyproline rich proteins	AT2G33490.1	hydroxyproline-rich glycoprotein family protein
30244271	Pavir.J17749.1	1992	9	-0.62008	0.650635	<.0001	<.0001	protein.postranslational modification	AT4G27800.1	thylakoid-associated phosphatase 38
30234167	Pavir.Ab00129.1	4948	1	-0.6159	0.652523	0.0459	0.1217	N/A	AT1G32260.1	N/A
30261597	Pavir.Db01853.1	777	6	-0.6156	0.652658	<.0001	<.0001	not assigned.no ontology	AT2G34460.1	NAD(P)-binding Rossmann-fold superfamily protein
30245209	Pavir.J38936.1	4406	2	-0.6155	0.652704	0.0969	0.2113	cell wall.cell wall proteins.LRR	AT4G06744.1	Leucine-rich repeat (LRR) family protein
30234325	Pavir.Ab00822.1	4434	1	-0.6147	0.653066	0.0023	0.0111	stress.abiotic.unspecified	AT2G26040.1	PYR1-like 2
30310204	Pavir.Eb03350.1	3730	1	-0.6078	0.656197	0.0616	0.1518	N/A	AT2G45000.1	structural constituent of nuclear pore
30188585	Pavir.Fa00746.1	3513	4	-0.60608	0.656979	<.0001	<.0001	transport.sugars	AT5G61520.1	Major facilitator superfamily protein
30221372	Pavir.Gb00103.1	4549	1	-0.5968	0.661219	0.11	0.2304	misc.oxidases - copper. flavone etc	AT5G07480.1	KAR-UP oxidoreductase 1
30241131	Pavir.Ib02762.1	3405	4	-0.596	0.661586	0.002	0.0099	protein.aa activation.lysine-tRNA ligase	AT3G13490.1	Lysyl-tRNA synthetase, class II
30187898	Pavir.Fa00453.1	3647	4	-0.59351	0.662729	<.0001	<.0001	protein.postranslational modification	AT5G63870.1	serine/threonine phosphatase 7
30247554	Pavir.J16753.1	1305	7	-0.59349	0.662738	<.0001	<.0001	RNA.regulation of transcription.putative transcription regulator	AT4G17950.1	AT hook motif DNA-binding family protein
30302010	Pavir.J20383.1	3263	2	-0.5887	0.664942	0.1335	0.2652	cell.organisation	AT2G38750.1	annexin 4
30253440	Pavir.Aa00714.1	4618	1	-0.5869	0.665772	0.0151	0.0518	signalling.MAP kinases	AT1G18160.1	Protein kinase superfamily protein
30209965	Pavir.Ia04493.1	3934	2	-0.5862	0.666095	0.0054	0.0225	N/A	AT4G38225.3	N/A
30300811	Pavir.Bb03658.1	4265	1	-0.586	0.666187	0.3276	0.4902	protein.postranslational modification.kinase	AT1G54610.1	Protein kinase superfamily protein
30264004	Pavir.J01285.1	2660	4	-0.5845	0.66688	0.0004	0.0025	stress.abiotic.unspecified	AT1G18970.1	germin-like protein 4
30297692	Pavir.Bb00960.1	2022	6	-0.58384	0.667186	<.0001	<.0001	major CHO metabolism.synthesis.starch.starch synthase	AT1G32900.1	UDP-Glycosyltransferase superfamily protein
30250830	Pavir.Aa00280.1	4726	3	-0.5821	0.667991	0.0097	0.036	cell.cycle	AT3G18730.1	tetratricopeptide repeat (TPR)-containing protein
30309745	Pavir.Eb02974.1	1411	4	-0.5806	0.668686	0.0001	0.0007	PS.lightreaction.ATP synthase	AT2G31040.1	ATP synthase protein I -related
30206281	Pavir.Ca01064.1	1645	8	-0.58051	0.668727	<.0001	<.0001	stress.biotic	AT2G36800.1	don-glucosyltransferase 1
30210105	Pavir.Ia00502.1	3715	2	-0.5788	0.66952	0.0881	0.1976	RNA.regulation of transcription.unclassified	AT2G34620.1	Mitochondrial transcription termination factor family protein
30215687	Pavir.Ia01554.1	1804	7	-0.57824	0.66978	<.0001	<.0001	stress.biotic	AT5G17540.1	HXXXD-type acyl-transferase family protein
30236602	Pavir.Ab02260.1	4215	2	-0.5777	0.670031	0.0013	0.0069	N/A	AT3G08010.1	RNA binding
30231117	Pavir.Ea00473.1	4798	1	-0.5765	0.670589	0.0593	0.1478	not assigned.no ontology	AT5G06570.1	alpha/beta-Hydrolases superfamily protein
30255868	Pavir.J21157.1	3790	3	-0.5756	0.671007	0.0009	0.005	N/A	AT2G25770.1	Polyketide cyclase/dehydrase and lipid transport superfamily protein
30248771	Pavir.J12289.1	2730	4	-0.5743	0.671612	0.0019	0.0094	protein.degradation.ubiquitin.E3.RING	AT1G12760.1	Zinc finger, C3HC4 type (RING finger) family protein
30263258	Pavir.J04108.1	2445	4	-0.5737	0.671891	<.0001	<.0001	RNA.regulation of transcription.SET-domain transcriptional regulator family	AT5G04940.1	SU(VAR)3-9 homolog 1
30308889	Pavir.Eb04026.1	4007	1	-0.573	0.672217	0.0543	0.1381	protein.degradation.aspartate protease	AT5G04710.1	Zn-dependent exopeptidases superfamily protein
30244264	Pavir.J00672.1	3576	2	-0.5703	0.673477	<.0001	<.0001	not assigned.no ontology	AT3G62160.1	HXXXD-type acyl-transferase family protein
30298858	Pavir.Bb01740.1	3628	2	-0.5673	0.674879	0.0323	0.0926	protein.postranslational modification	AT1G16270.1	Protein kinase superfamily protein with octicosapeptide/Phox/Bem1p domain
30213289	Pavir.Ia03327.1	4480	1	-0.5671	0.674972	0.261	0.4242	misc.peroxidases	AT4G11290.1	Peroxidase superfamily protein
30226385	Pavir.Ea01231.1	4471	2	-0.5653	0.675815	0.0283	0.0839	N/A	AT1G23400.1	RNA-binding CRS1 / YhbY (CRM) domain-containing protein
30303132	Pavir.Ga01483.1	3046	4	-0.5636	0.676612	0.0086	0.0328	signalling.light	AT4G08920.1	cryptochrome 1
30264292	Pavir.Hb00067.1	3378	2	-0.5634	0.676705	0.0003	0.002	development.unspecified	AT1G66330.1	senescence-associated family protein
30228680	Pavir.Ea02985.1	2704	1	-0.5628	0.676987	0.1389	0.2722	protein.degradation	AT5G19740.1	Peptidase M28 family protein
30189656	Pavir.J35066.1	1674	1	-0.5618	0.677456	0.175	0.3211	PS.lightreaction.photosystem II.PSII polypeptide subunits	AT4G15510.1	Photosystem II reaction center PsbP family protein
30280211	Pavir.Fb00486.1	3840	2	-0.5615	0.677597	0.0005	0.0031	signalling.receptor kinases.leucine rich repeat II	AT1G34210.1	somatic embryogenesis receptor-like kinase 2
30286485	Pavir.J16702.1	2662	3	-0.55848	0.679017	<.0001	<.0001	glycolysis.plastid branch.phosphoglucomutase (PGM)	AT1G70820.1	phosphoglucomutase, putative / glucose phosphomutase, putative
30225449	Pavir.J02207.1	2	33	-0.55781	0.679333	<.0001	<.0001	gluconeogenesis / glyoxylate cycle.pyruvate dikinase	AT4G15530.1	pyruvate orthophosphate dikinase
30264037	Pavir.J00968.1	4714	1	-0.5564	0.679997	0.0016	0.0081	N/A	AT1G34320.1	Protein of unknown function (DUF668)
30254018	Pavir.J08057.1	3695	2	-0.5556	0.680374	0.0158	0.0538	N/A	AT2G42975.1	N/A
30188151	Pavir.Fa00645.1	263	47	-0.55282	0.681686	<.0001	<.0001	transport.metabolite transporters at the mitochondrial membrane	AT2G22500.1	uncoupling protein 5
30189306	Pavir.J10324.1	2314	2	-0.5512	0.682452	0.0004	0.0025	glycolysis.plastid branch.phosphoglucomutase (PGM)	AT1G70820.1	phosphoglucomutase, putative / glucose phosphomutase, putative
30311469	Pavir.Eb02622.1	318	6	-0.54812	0.683911	<.0001	<.0001	PS.photorespiration.glycine cleavage.P subunit	AT2G26080.1	glycine decarboxylase P-protein 2
30237923	Pavir.Ib03244.1	4901	3	-0.546	0.684916	<.0001	<.0001	not assigned.no ontology.pentatricopeptide (PPR) repeat-containing protein	AT1G13630.1	Tetratricopeptide repeat (TPR)-like superfamily protein
30245980	Pavir.J02619.1	4539	1	-0.5429	0.68639	0.0216	0.0686	protein.degradation.metalloprotease	AT4G37040.1	methionine aminopeptidase 1D
30293518	Pavir.Ba01986.1	4656	1	-0.5423	0.686675	0.0655	0.1586	stress.abiotic.heat	AT2G01710.1	Chaperone DnaJ-domain superfamily protein
30244555	Pavir.J09852.1	386	4	-0.5423	0.686675	0.0002	0.0014	transport.metabolite transporters at the mitochondrial membrane	AT5G46800.1	Mitochondrial substrate carrier family protein
30199049	Pavir.J15849.1	1	44	-0.5398	0.687866	<.0001	<.0001	gluconeogenesis / glyoxylate cycle.pyruvate dikinase	AT4G15530.5	pyruvate orthophosphate dikinase
30210620	Pavir.Ia04357.1	2402	5	-0.53824	0.68861	<.0001	<.0001	not assigned.no ontology	AT5G21950.1	alpha/beta-Hydrolases superfamily protein
30239510	Pavir.Ib02558.1	4135	1	-0.5375	0.688964	0.094	0.207	misc.peroxidases	AT5G05340.1	Peroxidase superfamily protein
30226043	Pavir.Ea02601.1	244	29	-0.53651	0.689437	<.0001	<.0001	PS.photorespiration.glycine cleavage.P subunit	AT2G26080.1	glycine decarboxylase P-protein 2
30207892	Pavir.J36806.1	1519	3	-0.536	0.68968	0.0264	0.08	protein.degradation.serine protease	AT2G47940.1	DEGP protease 2
30283974	Pavir.J04887.1	1334	3	-0.53521	0.690058	<.0001	<.0001	N/A	AT4G15545.1	N/A
30222060	Pavir.Gb00196.1	2066	4	-0.5344	0.690446	<.0001	<.0001	nucleotide metabolism.phosphotransfer and pyrophosphatases.misc	AT2G46860.1	pyrophosphorylase 3
30289927	Pavir.Ba00162.1	4271	1	-0.5338	0.690733	0.1209	0.2462	N/A	N/A	N/A
30211921	Pavir.Ia04119.1	2917	3	-0.53188	0.691653	<.0001	<.0001	signalling.light	AT5G67385.1	Phototropic-responsive NPH3 family protein
30215920	Pavir.Ia02169.1	1491	10	-0.53099	0.69208	<.0001	<.0001	misc.oxidases - copper. flavone etc	AT1G63370.1	Flavin-binding monooxygenase family protein
30202398	Pavir.J12487.1	3562	1	-0.5293	0.692891	0.0138	0.0481	protein.degradation.subtilases	AT1G32940.1	Subtilase family protein
30289762	Pavir.Ba03271.1	4371	1	-0.5291	0.692987	0.0528	0.135	RNA.regulation of transcription.SET-domain transcriptional regulator family	AT5G04940.1	SU(VAR)3-9 homolog 1
30231807	Pavir.J26403.1	3390	2	-0.528	0.693515	0.0036	0.0161	N/A	AT2G29630.1	thiaminC
30273659	Pavir.J36808.1	4890	1	-0.5275	0.693756	0.0299	0.0876	stress.biotic	AT3G07040.1	NB-ARC domain-containing disease resistance protein
30281883	Pavir.J07332.1	1601	9	-0.52561	0.694665	<.0001	<.0001	cell.cycle.peptidylprolyl isomerase	AT5G35100.1	Cyclophilin-like peptidyl-prolyl cis-trans isomerase family protein
30303555	Pavir.Ga00529.1	536	13	-0.52392	0.69548	<.0001	<.0001	RNA.regulation of transcription.putative transcription regulator	AT5G46640.1	AT hook motif DNA-binding family protein
30294394	Pavir.J06215.1	4306	1	-0.5229	0.695971	0.0381	0.105	secondary metabolism.isoprenoids.non-mevalonate pathway	AT5G15460.1	membrane-anchored ubiquitin-fold protein 2
30231663	Pavir.Ea03603.1	2888	4	-0.5228	0.69602	<.0001	<.0001	protein.postranslational modification	AT4G21860.1	methionine sulfoxide reductase B 2
30192025	Pavir.Da01850.1	4759	1	-0.5223	0.696261	0.0167	0.0562	misc.UDP glucosyl and glucoronyl transferases	AT2G36780.1	UDP-Glycosyltransferase superfamily protein
30303723	Pavir.Ga00544.1	571	10	-0.5213	0.696744	<.0001	<.0001	amino acid metabolism.synthesis.branched chain group.leucine specific.3-isopropylmalate dehydrogenase	AT1G80560.1	isopropylmalate dehydrogenase 2
30287440	Pavir.J11897.1	4393	1	-0.5212	0.696792	0.1824	0.3287	transport.misc	AT1G26690.1	emp24/gp25L/p24 family/GOLD family protein
30262041	Pavir.Db00653.1	155	68	-0.52066	0.697053	<.0001	<.0001	N/A	AT5G54770.1	thiazole biosynthetic enzyme, chloroplast (ARA6) (THI1) (THI4)
30240133	Pavir.Ib01675.1	4696	1	-0.5206	0.697082	0.0957	0.2098	protein.synthesis.ribosome biogenesis.Pre-rRNA processing and modifications.snoRNPs	AT3G12860.1	NOP56-like pre RNA processing ribonucleoprotein
30290517	Pavir.Ba01392.1	1524	14	-0.51977	0.697483	<.0001	<.0001	cell.organisation	AT1G42550.1	plastid movement impaired1
30251594	Pavir.Aa02051.1	4729	1	-0.5195	0.697614	0.1398	0.2732	development.unspecified	AT3G13870.1	Root hair defective 3 GTP-binding protein (RHD3)
30276577	Pavir.J30504.1	4672	1	-0.5175	0.698581	0.0042	0.0183	N/A	AT3G44600.1	cyclophilin71
30222094	Pavir.Gb02072.1	3066	2	-0.5168	0.69892	0.0207	0.0667	not assigned.no ontology	AT3G62160.1	HXXXD-type acyl-transferase family protein
30242267	Pavir.Ib04384.1	3131	1	-0.5159	0.699357	0.0688	0.1645	signalling.receptor kinases.leucine rich repeat II	AT5G10290.1	leucine-rich repeat transmembrane protein kinase family protein
30239425	Pavir.Ib01813.1	1622	5	-0.5157	0.699453	0.0003	0.002	major CHO metabolism.degradation.sucrose.Susy	AT3G43190.1	sucrose synthase 4
30200411	Pavir.J36590.1	2686	3	-0.5148	0.69989	0.1071	0.2266	misc.beta 1.3 glucan hydrolases.glucan endo-1.3-beta-glucosidase	AT2G05790.1	O-Glycosyl hydrolases family 17 protein
30214461	Pavir.Ia02867.1	2194	8	-0.51465	0.699963	<.0001	<.0001	cell.organisation	AT1G42550.1	plastid movement impaired1
30215299	Pavir.Ia01092.1	486	6	-0.51235	0.70108	<.0001	<.0001	cell.organisation	AT5G23860.1	tubulin beta 8
30310233	Pavir.Eb01170.1	2860	3	-0.5116	0.701444	0.0031	0.0143	mitochondrial electron transport / ATP synthesis.NADH-DH.complex I.carbonic anhydrase	AT1G19580.1	gamma carbonic anhydrase 1
30209408	Pavir.Ia04318.1	2952	1	-0.5096	0.702417	0.0864	0.1946	N/A	AT5G09960.1	N/A
30189945	Pavir.J40418.1	4374	1	-0.5082	0.703099	0.0654	0.1586	N/A	N/A	N/A
30193904	Pavir.Da00236.1	2463	4	-0.50801	0.703192	<.0001	<.0001	N/A	AT3G08600.1	Protein of unknown function (DUF1191)
30227271	Pavir.Ea00712.1	3523	5	-0.5048	0.704758	<.0001	<.0001	protein.aa activation.leucine-tRNA ligase	AT4G04350.1	tRNA synthetase class I (I, L, M and V) family protein
30206817	Pavir.Ca00517.1	3624	3	-0.5007	0.706764	0.0267	0.0807	protein.postranslational modification	AT2G42810.2	protein phosphatase 5.2
30223397	Pavir.Gb00456.1	1625	10	-0.49962	0.707293	<.0001	<.0001	major CHO metabolism.synthesis.starch.starch synthase	AT1G11720.2	starch synthase 3
30208622	Pavir.J03219.1	4400	1	-0.499	0.707597	0.0594	0.1479	development.unspecified	AT1G45230.1	Protein of unknown function (DUF3223)
30267915	Pavir.Cb01952.1	744	10	-0.49894	0.707627	<.0001	<.0001	N/A	N/A	N/A
30308920	Pavir.Eb01915.1	4040	1	-0.4987	0.707744	0.0548	0.1391	RNA.regulation of transcription.unclassified	AT3G12680.1	floral homeotic protein (HUA1)
30258629	Pavir.J02055.1	2897	5	-0.4976	0.708284	0.0517	0.1329	stress.abiotic.unspecified	AT5G39110.1	RmlC-like cupins superfamily protein
30207853	Pavir.J25557.1	1076	2	-0.4953	0.709414	0.0005	0.0031	misc.GCN5-related N-acetyltransferase	AT1G26220.1	Acyl-CoA N-acyltransferases (NAT) superfamily protein
30267206	Pavir.J00791.1	4059	1	-0.4894	0.712321	0.1913	0.3403	not assigned.no ontology	AT2G25110.1	stromal cell-derived factor 2-like protein precursor
30273756	Pavir.J13446.1	1675	5	-0.4879	0.713062	0.0008	0.0046	N/A	AT4G13220.1	N/A
30258501	Pavir.J02200.1	3339	1	-0.4858	0.714101	0.085	0.1926	not assigned.no ontology	AT2G21160.1	Translocon-associated protein (TRAP), alpha subunit
30316160	Pavir.Ha01806.1	1989	4	-0.4857	0.71415	0.0021	0.0103	not assigned.no ontology	AT3G48420.1	Haloacid dehalogenase-like hydrolase (HAD) superfamily protein
30235206	Pavir.Ab02777.1	4668	1	-0.4844	0.714794	0.4699	0.626	cell.vesicle transport	AT5G46860.1	Syntaxin/t-SNARE family protein
30291982	Pavir.Ba00559.1	4889	1	-0.4841	0.714943	0.0689	0.1646	transport.sugars	AT2G16120.1	polyol/monosaccharide transporter 1
30313914	Pavir.Eb00285.1	3871	1	-0.4817	0.716133	0.0103	0.0377	N/A	AT1G17620.1	Late embryogenesis abundant (LEA) hydroxyproline-rich glycoprotein family
30252129	Pavir.Aa02738.1	4856	4	-0.48129	0.716337	<.0001	<.0001	N/A	N/A	N/A
30223763	Pavir.Gb00063.1	4091	1	-0.4812	0.716382	0.1443	0.279	nucleotide metabolism.synthesis.pyrimidine.dihydroorotate dehydrogenase	AT5G23300.1	pyrimidine d
30221859	Pavir.Gb01776.1	4409	1	-0.4792	0.717375	0.0638	0.1555	protein.synthesis.ribosomal protein.prokaryotic.mitochondrion.30S subunit.S11	AT1G31817.1	Ribosomal L18p/L5e family protein
30201365	Pavir.J39839.1	1169	7	-0.47797	0.717987	<.0001	<.0001	N/A	AT1G29700.1	Metallo-hydrolase/oxidoreductase superfamily protein
30215548	Pavir.Ia02525.1	1866	1	-0.4762	0.718869	0.0857	0.1936	secondary metabolism.flavonoids.chalcones	AT1G59960.1	NAD(P)-linked oxidoreductase superfamily protein
30262158	Pavir.Db00648.1	1390	12	-0.47581	0.719063	<.0001	<.0001	RNA.regulation of transcription.HB.Homeobox transcription factor family	AT5G25220.1	KNOTTED1-like homeobox gene 3
30290048	Pavir.Ba03442.1	728	9	-0.47446	0.719736	<.0001	<.0001	RNA.processing	AT1G08370.1	decapping 1
30219813	Pavir.J13116.1	4801	2	-0.4723	0.720815	0.0098	0.0362	cell wall.modification	AT1G69530.1	expansin A1
30265013	Pavir.Hb00233.1	2526	2	-0.4691	0.722415	0.0068	0.0272	signalling.G-proteins	AT3G12080.1	GTP-binding family protein
30204480	Pavir.Ca01857.1	2157	5	-0.4686	0.722666	0.0059	0.0242	protein.synthesis.ribosomal protein.prokaryotic.unknown organellar.30S subunit.S1	AT1G71720.1	Nucleic acid-binding proteins superfamily
30239623	Pavir.Ib00187.1	3522	2	-0.4686	0.722666	0.0544	0.1382	RNA.regulation of transcription.Bromodomain proteins	AT1G76380.1	DNA-binding bromodomain-containing protein
30206918	Pavir.Ca01816.1	1467	14	-0.46798	0.722976	<.0001	<.0001	PS.lightreaction.state transition	AT1G68830.1	STT7 homolog STN7
30294724	Pavir.J02043.1	4506	1	-0.4672	0.723367	0.112	0.2331	protein.degradation.serine protease	AT3G07990.1	serine carboxypeptidase-like 27
30252854	Pavir.Aa00019.1	4488	2	-0.4672	0.723367	0.0229	0.0718	N/A	ATCG00430.1	photosystem II reaction center protein G
30247585	Pavir.J15625.1	1464	4	-0.4667	0.723618	0.0002	0.0014	nucleotide metabolism.synthesis.purine.amidophosphoribosyltransferase	AT2G16570.1	GLN phosphoribosyl pyrophosphate amidotransferase 1
30243740	Pavir.J12272.1	575	2	-0.466	0.723969	0.0006	0.0035	N/A	AT1G06690.1	NAD(P)-linked oxidoreductase superfamily protein
30283761	Pavir.J05690.1	3999	1	-0.4659	0.724019	0.0399	0.109	protein.degradation.ubiquitin.E3.RING	AT2G35330.1	RING/U-box superfamily protein
30244558	Pavir.J23107.1	321	39	-0.46361	0.725169	<.0001	<.0001	mitochondrial electron transport / ATP synthesis.uncoupling protein	AT4G24570.1	dicarboxylate carrier 2
30238327	Pavir.Ib01619.1	1785	11	-0.46336	0.725295	<.0001	<.0001	not assigned.no ontology	AT3G06130.1	Heavy metal transport/detoxification superfamily protein
30244799	Pavir.J00153.1	4107	1	-0.4632	0.725376	0.1625	0.3034	DNA.synthesis/chromatin structure	AT3G10690.1	DNA GYRASE A
30302382	Pavir.Ga01725.1	2978	3	-0.4627	0.725627	0.0009	0.005	signalling.calcium	AT5G57580.1	Calmodulin-binding protein
30216329	Pavir.J00886.1	4377	2	-0.4619	0.726029	0.0276	0.0826	signalling.G-proteins	AT3G59920.1	RAB GDP dissociation inhibitor 2
30208845	Pavir.J40478.1	2736	6	-0.4615	0.726231	0.0002	0.0014	N/A	AT2G26340.2	N/A
30214537	Pavir.Ia03270.1	2071	7	-0.4589	0.727541	<.0001	<.0001	N/A	AT5G15270.1	RNA-binding KH domain-containing protein
30190222	Pavir.J10390.1	4744	1	-0.4586	0.727692	0.2043	0.3555	PS.lightreaction.other electron carrier (ox/red).ferredoxin	AT4G32590.1	2Fe-2S ferredoxin-like superfamily protein
30318020	Pavir.Ha01274.1	2881	3	-0.4578	0.728096	0.0024	0.0115	stress.abiotic.heat	AT4G09350.1	Chaperone DnaJ-domain superfamily protein
30242307	Pavir.Ib03248.1	3798	1	-0.4565	0.728752	0.1009	0.2177	N/A	AT1G02020.1	nitroreductase family protein
30223599	Pavir.Gb00535.1	1781	3	-0.4556	0.729207	0.0931	0.2058	not assigned.no ontology	AT3G23840.1	HXXXD-type acyl-transferase family protein
30297625	Pavir.Bb03218.1	3291	1	-0.4553	0.729358	0.0125	0.0444	transport.sugars	AT3G18830.1	polyol/monosaccharide transporter 5
30303347	Pavir.Ga01926.1	601	25	-0.45384	0.730097	<.0001	<.0001	major CHO metabolism.synthesis.starch.starch branching	AT5G03650.1	starch branching enzyme 2.2
30192292	Pavir.Da01081.1	921	5	-0.45242	0.730816	<.0001	<.0001	not assigned.no ontology	AT2G34460.1	NAD(P)-binding Rossmann-fold superfamily protein
30230671	Pavir.Ea03382.1	2492	3	-0.4519	0.731079	0.0036	0.0161	N/A	AT2G37770.2	NAD(P)-linked oxidoreductase superfamily protein
30279639	Pavir.Fb00477.1	1461	11	-0.45163	0.731216	<.0001	<.0001	N/A	N/A	N/A
30230095	Pavir.Ea03054.1	4855	1	-0.4496	0.732246	0.0708	0.1678	RNA.regulation of transcription.unclassified	AT4G11060.1	mitochondrially targeted single-stranded DNA binding protein
30187878	Pavir.Fa02200.1	3998	2	-0.4481	0.733008	0.0213	0.068	N/A	AT4G24270.1	EMBRYO DEFECTIVE 140
30293554	Pavir.Ba01406.1	2852	4	-0.44792	0.733099	<.0001	<.0001	protein.aa activation.cysteine-tRNA ligase	AT2G31170.1	Cysteinyl-tRNA synthetase, class Ia family protein
30271480	Pavir.J06864.1	4127	3	-0.4479	0.733109	0.0002	0.0014	development.unspecified	AT2G39900.1	GATA type zinc finger transcription factor family protein
30265840	Pavir.Hb01912.1	697	15	-0.44784	0.73314	<.0001	<.0001	RNA.regulation of transcription.HB.Homeobox transcription factor family	AT2G35940.1	BEL1-like homeodomain 1
30266683	Pavir.Hb00197.1	3618	3	-0.4478	0.73316	0.0023	0.0111	protein.degradation.subtilases	AT4G10520.1	Subtilase family protein
30261514	Pavir.Db00537.1	822	1	-0.4471	0.733516	0.1063	0.2252	amino acid metabolism.synthesis.serine-glycine-cysteine group.serine.phosphoglycerate dehydrogenase	AT1G17745.1	D-3-phosphoglycerate dehydrogenase
30187238	Pavir.Fa00501.1	1091	2	-0.44525	0.734457	<.0001	<.0001	N/A	AT4G28706.3	pfkB-like carbohydrate kinase family protein
30300154	Pavir.Bb03688.1	1422	1	-0.4448	0.734686	0.386	0.5505	protein.synthesis.ribosomal protein.eukaryotic.60S subunit.L22	AT3G05560.1	Ribosomal L22e protein family
30253850	Pavir.Aa01893.1	613	2	-0.4409	0.736675	0.0674	0.1619	RNA.regulation of transcription.Zn-finger(CCHC)	AT5G07350.1	TUDOR-SN protein 1
30301118	Pavir.Bb00477.1	2180	1	-0.4407	0.736777	0.3777	0.5441	amino acid metabolism.synthesis.aromatic aa.tryptophan.tryptophan synthase	AT4G02610.1	Aldolase-type TIM barrel family protein
30296098	Pavir.J36988.1	2759	1	-0.4394	0.737441	0.2136	0.3665	N/A	AT5G43750.1	NAD(P)H dehydrogenase 18
30317593	Pavir.Ha00805.1	4864	1	-0.439	0.737646	0.1854	0.3325	N/A	N/A	N/A
30229681	Pavir.Ea00887.1	4444	1	-0.4384	0.737953	0.3597	0.5249	not assigned.no ontology	AT5G48960.1	HAD-superfamily hydrolase, subfamily IG, 5\'-nucleotidase
30239783	Pavir.Ib04193.1	4520	2	-0.4366	0.738874	0.0188	0.0616	cell.organisation	AT5G45110.1	NPR1-like protein 3
30278908	Pavir.Fb02356.1	3125	2	-0.4347	0.739848	0.0027	0.0127	not assigned.no ontology	AT5G10460.1	Haloacid dehalogenase-like hydrolase (HAD) superfamily protein
30302818	Pavir.Ga01591.1	987	2	-0.43338	0.740525	0.0001	0.0007	protein.synthesis.initiation	AT3G26400.1	eukaryotic translation initiation factor 4B1
30270987	Pavir.J04642.1	3327	1	-0.433	0.74072	0.2459	0.4045	lipid metabolism.lipid degradation.lysophospholipases.carboxylesterase	AT5G20060.1	alpha/beta-Hydrolases superfamily protein
30228964	Pavir.Ea04083.1	4529	1	-0.4329	0.740771	0.2849	0.451	signalling.in sugar and nutrient physiology	AT2G13440.1	glucose-inhibited division family A protein
30257159	Pavir.J09775.1	4160	3	-0.4322	0.741131	0.0029	0.0135	N/A	AT4G38225.3	N/A
30274733	Pavir.J02826.1	3819	2	-0.4322	0.741131	0.0179	0.0592	N/A	AT5G16080.1	carboxyesterase 17
30315277	Pavir.J21432.1	2942	2	-0.432	0.741234	0.0011	0.006	signalling.receptor kinases.leucine rich repeat III	AT1G48480.1	receptor-like kinase 1
30217468	Pavir.J28386.1	4131	1	-0.4316	0.741439	0.2546	0.4159	DNA.synthesis/chromatin structure	AT5G22010.1	replication factor C1
30203271	Pavir.Ca00722.1	1469	3	-0.4307	0.741902	0.008	0.031	signalling.calcium	AT5G03040.1	IQ-domain 2
30196725	Pavir.J09750.1	2996	5	-0.42934	0.742601	<.0001	<.0001	protein.degradation.subtilases	AT4G10520.1	Subtilase family protein
30269632	Pavir.Cb00392.1	4675	1	-0.4285	0.743034	0.0599	0.1488	N/A	N/A	N/A
30310986	Pavir.Eb03706.1	4694	1	-0.4284	0.743085	0.0042	0.0183	protein.postranslational modification.kinase.receptor like cytoplasmatic kinase IV	AT5G58940.1	calmodulin-binding receptor-like cytoplasmic kinase 1
30206739	Pavir.Ca02452.1	1713	7	-0.42732	0.743642	<.0001	<.0001	misc.dynamin	AT1G60500.1	Dynamin related protein 4C
30310622	Pavir.Eb01789.1	4449	1	-0.4265	0.744065	0.1503	0.286	not assigned.no ontology	AT5G24710.1	Transducin/WD40 repeat-like superfamily protein
30240987	Pavir.Ib02480.1	2192	2	-0.4259	0.744374	0.0057	0.0235	misc.glutathione S transferases	AT1G10370.1	Glutathione S-transferase family protein
30222788	Pavir.Gb02215.1	4161	2	-0.4256	0.744529	0.0204	0.066	misc.UDP glucosyl and glucoronyl transferases	AT1G22360.1	UDP-glucosyl transferase 85A2
30236907	Pavir.Ib01296.1	4075	2	-0.4251	0.744787	0.0022	0.0107	N/A	AT3G53630.1	N/A
30222842	Pavir.Gb01559.1	4606	2	-0.42437	0.745164	<.0001	<.0001	N/A	N/A	N/A
30241597	Pavir.Ib00507.1	4711	1	-0.4242	0.745252	0.0967	0.2112	secondary metabolism.isoprenoids	AT2G26250.1	3-ketoacyl-CoA synthase 10
30198772	Pavir.J08153.1	4949	1	-0.424	0.745355	0.193	0.3421	mitochondrial electron transport / ATP synthesis.cytochrome c oxidase	AT3G15640.2	Rubredoxin-like superfamily protein
30191625	Pavir.Da01111.1	4263	2	-0.4213	0.746751	0.0093	0.0348	signalling.receptor kinases.proline extensin like	AT1G23540.1	Protein kinase superfamily protein
30187844	Pavir.Fa01395.1	2316	7	-0.4205	0.747166	0.0005	0.0031	secondary metabolism.phenylpropanoids.lignin biosynthesis.4CL	AT1G51680.1	4-coumarate:CoA ligase 1
30302098	Pavir.J00113.1	4199	2	-0.4201	0.747373	0.0506	0.1308	secondary metabolism.phenylpropanoids.lignin biosynthesis.CCR1	AT5G58490.1	NAD(P)-binding Rossmann-fold superfamily protein
30300129	Pavir.Bb00728.1	1307	4	-0.41968	0.74759	0.0001	0.0007	RNA.processing	AT1G08370.1	decapping 1
30252328	Pavir.Aa01512.1	3927	3	-0.4177	0.748617	0.0012	0.0064	lipid metabolism.lipid degradation.lysophospholipases.carboxylesterase	AT1G47480.1	alpha/beta-Hydrolases superfamily protein
30293526	Pavir.Ba00385.1	3592	1	-0.4173	0.748825	0.5788	0.715	not assigned.no ontology	AT4G39720.1	VQ motif-containing protein
30192864	Pavir.Da00241.1	4197	1	-0.4169	0.749032	0.0935	0.2063	DNA.repair	AT1G52500.2	MUTM homolog-1
30297477	Pavir.Bb03465.1	732	15	-0.41647	0.749256	<.0001	<.0001	signalling.in sugar and nutrient physiology.pyruvate dehydrogenase kinase	AT3G06483.1	pyruvate dehydrogenase kinase
30192638	Pavir.Da00670.1	4870	1	-0.4163	0.749344	0.0133	0.0467	RNA.regulation of transcription.HDA	AT4G38130.1	histone deacetylase 1
30222619	Pavir.Gb02136.1	2689	3	-0.4161	0.749448	0.0034	0.0154	tetrapyrrole synthesis.magnesium chelatase	AT5G13630.1	magnesium-chelatase subunit chlH, chloroplast, putative / Mg-protoporphyrin IX chelatase, putative (CHLH)
30204866	Pavir.Ca00303.1	2399	2	-0.4161	0.749448	0.0288	0.0851	N/A	N/A	N/A
30233125	Pavir.Ab02941.1	653	14	-0.41603	0.749484	<.0001	<.0001	protein.degradation	AT1G73990.1	signal peptide peptidase
30214895	Pavir.Ia00327.1	4705	1	-0.4154	0.749812	0.0968	0.2113	hormone metabolism.jasmonate.synthesis-degradation.allene oxidase synthase	AT5G42650.1	allene oxide synthase
30222382	Pavir.Gb00127.1	1732	11	-0.41485	0.750097	<.0001	<.0001	cell.division	AT1G19880.1	Regulator of chromosome condensation (RCC1) family protein
30310192	Pavir.Eb00745.1	4364	1	-0.4126	0.751268	0.0635	0.1551	redox.ascorbate and glutathione.glutathione	AT4G29210.1	gamma-glutamyl transpeptidase 4
30280437	Pavir.Fb01392.1	3032	2	-0.4114	0.751893	0.0716	0.1689	misc.glutathione S transferases	AT3G03190.1	glutathione S-transferase F11
30293170	Pavir.Ba00331.1	1994	4	-0.4107	0.752258	0.0013	0.0069	signalling.in sugar and nutrient physiology.pyruvate dehydrogenase kinase	AT3G06483.1	pyruvate dehydrogenase kinase
30268167	Pavir.Cb00925.1	3957	1	-0.4102	0.752519	0.0231	0.0722	RNA.regulation of transcription.putative transcription regulator	AT3G08020.1	PHD finger family protein
30249898	Pavir.Aa03387.1	2222	1	-0.4098	0.752728	0.2499	0.4098	N/A	AT1G31190.1	myo-inositol monophosphatase like 1
30204477	Pavir.Ca02766.1	2908	6	-0.40937	0.752952	<.0001	<.0001	N/A	AT5G57040.1	Lactoylglutathione lyase / glyoxalase I family protein
30185876	Pavir.Fa00386.1	4164	1	-0.4092	0.753041	0.1333	0.265	N/A	AT3G14430.1	N/A
30289020	Pavir.Ba00389.1	1360	7	-0.40802	0.753657	<.0001	<.0001	amino acid metabolism.synthesis.aromatic aa.chorismate.3-deoxy-D-arabino-heptulosonate 7-phosphate synthase	AT1G22410.1	Class-II DAHP synthetase family protein
30304856	Pavir.Ga00590.1	4412	1	-0.4073	0.754033	0.0657	0.159	N/A	AT1G51590.1	alpha-mannosidase 1
30318156	Pavir.Ha01153.1	4492	1	-0.4069	0.754242	0.3205	0.4845	protein.synthesis.ribosomal protein.eukaryotic.60S subunit.L18A	AT2G34480.1	Ribosomal protein L18ae/LX family protein
30309428	Pavir.Eb03716.1	4385	1	-0.4066	0.754399	0.0848	0.1923	nucleotide metabolism.synthesis.purine.FGAR amidotransferase	AT1G74260.1	purine biosynthesis 4
30272698	Pavir.J00951.1	3387	2	-0.406	0.754713	0.0015	0.0077	RNA.regulation of transcription.B3 transcription factor family	AT5G58280.1	AP2/B3-like transcriptional factor family protein
30195872	Pavir.J35032.1	3796	1	-0.4059	0.754765	0.3048	0.4708	protein.aa activation.histidine-tRNA ligase	AT3G02760.1	Class II aaRS and biotin synthetases superfamily protein
30256329	Pavir.J10851.1	2802	1	-0.4058	0.754818	0.1273	0.2558	protein.degradation.subtilases	AT5G67360.1	Subtilase family protein
30293316	Pavir.Ba01379.1	4791	1	-0.4055	0.754975	0.0258	0.0787	RNA.regulation of transcription.Nucleosome/chromatin assembly factor group	AT1G20696.3	high mobility group B3
30221843	Pavir.Gb01923.1	4633	1	-0.4051	0.755184	0.1628	0.3036	N/A	AT4G34215.1	Domain of unknown function (DUF303)
30296018	Pavir.J05934.1	3027	3	-0.40441	0.755545	0.0002	0.0014	protein.degradation.serine protease	AT3G07950.1	rhomboid protein-related
30272275	Pavir.J14690.1	4478	1	-0.4036	0.75597	0.0799	0.1841	TCA / org transformation.carbonic anhydrases	AT1G08080.1	alpha carbonic anhydrase 7
30214156	Pavir.Ia00696.1	3091	5	-0.4036	0.75597	0.0014	0.0073	N/A	AT1G49975.1	N/A
30313632	Pavir.Eb03610.1	2112	1	-0.4032	0.756179	0.0537	0.137	N/A	AT4G04770.1	ATP binding cassette protein 1
30209873	Pavir.Ia01328.1	4682	1	-0.4031	0.756232	0.0549	0.1392	N/A	AT1G69040.2	ACT domain repeat 4
30276286	Pavir.J33283.1	2186	1	-0.4026	0.756494	0.0224	0.0707	major CHO metabolism.degradation.starch.laforin like phosphoglucan phosphatase (SEX4)	AT3G52180.1	dual specificity protein phosphatase (DsPTP1) family protein
30304707	Pavir.Ga00526.1	1977	4	-0.40249	0.756551	0.0001	0.0007	lipid metabolism.FA synthesis and FA elongation.acyl coa ligase	AT3G48990.1	AMP-dependent synthetase and ligase family protein
30278788	Pavir.Fb00352.1	991	17	-0.40193	0.756845	<.0001	<.0001	cell.vesicle transport	AT4G21450.1	PapD-like superfamily protein
30186554	Pavir.Fa01758.1	2576	8	-0.4011	0.757281	0.0005	0.0031	N/A	AT4G22310.1	Uncharacterised protein family (UPF0041)
30281685	Pavir.J12153.1	4357	1	-0.4007	0.757491	0.0827	0.1889	secondary metabolism.isoprenoids.carotenoids.violaxanthin de-epoxidase	AT2G21860.1	violaxanthin de-epoxidase-related
30307259	Pavir.J21212.1	3569	2	-0.4005	0.757596	0.024	0.0743	N/A	AT3G27700.1	zinc finger (CCCH-type) family protein / RNA recognition motif (RRM)-containing protein
30191141	Pavir.J10341.1	308	7	-0.39993	0.757895	<.0001	<.0001	metal handling.binding. chelation and storage	AT3G17390.1	S-adenosylmethionine synthetase family protein
30240068	Pavir.Ib01476.1	3770	1	-0.3998	0.757963	0.1264	0.2542	N/A	AT4G01940.1	NFU domain protein 1
30222651	Pavir.Gb01749.1	3269	2	-0.39918	0.758289	0.0009	0.005	nucleotide metabolism.synthesis.purine.GAR transformylase	AT1G31220.1	Formyl transferase
30260482	Pavir.Db00270.1	1442	9	-0.39907	0.758347	<.0001	<.0001	transport.ABC transporters and multidrug resistance systems	AT1G67940.1	non-intrinsic ABC protein 3
30280423	Pavir.Fb00666.1	2700	3	-0.3988	0.758489	0.0059	0.0242	transport.metabolite transporters at the envelope membrane	AT5G33320.1	Glucose-6-phosphate/phosphate translocator-related
30280848	Pavir.Fb02189.1	3689	6	-0.39824	0.758783	<.0001	<.0001	cell.organisation	AT4G05190.1	kinesin 5
30188897	Pavir.J39591.1	1244	1	-0.3976	0.75912	0.1957	0.3451	protein.degradation.metalloprotease	AT2G26140.1	FTSH protease 4
30205369	Pavir.Ca01118.1	3997	3	-0.39675	0.759567	0.0005	0.0031	misc.UDP glucosyl and glucoronyl transferases	AT3G16520.3	UDP-glucosyl transferase 88A1
30305390	Pavir.Ga00876.1	1623	1	-0.3965	0.759699	0.0174	0.0579	misc.short chain dehydrogenase/reductase (SDR)	AT3G61220.2	NAD(P)-binding Rossmann-fold superfamily protein
30204759	Pavir.Ca02489.1	4519	1	-0.3963	0.759804	0.0524	0.1343	N/A	AT4G34340.1	TBP-associated factor 8
30252750	Pavir.Aa00338.1	4596	1	-0.396	0.759962	0.0287	0.0849	RNA.regulation of transcription.Global transcription factor group	AT4G08350.1	global transcription factor group A2
30202559	Pavir.J31426.1	4702	1	-0.3959	0.760015	0.2857	0.4515	N/A	AT5G61412.1	N/A
30301663	Pavir.Bb01188.1	4294	2	-0.3959	0.760015	0.0936	0.2063	protein.degradation.ubiquitin.E1	AT2G21470.1	SUMO-activating enzyme 2
30254989	Pavir.J17501.1	2042	1	-0.3953	0.760331	0.1428	0.2775	protein.degradation	AT2G27920.1	serine carboxypeptidase-like 51
30273215	Pavir.J04127.1	3854	1	-0.3948	0.760595	0.1084	0.2283	RNA.processing	AT2G23930.1	probable small nuclear ribonucleoprotein G
30308722	Pavir.Eb01110.1	4119	1	-0.3941	0.760964	0.242	0.3995	amino acid metabolism.degradation.branched chain group.leucine	AT2G26800.1	Aldolase superfamily protein
30274647	Pavir.J18148.1	3945	2	-0.3939	0.761069	0.0349	0.0984	protein.degradation	AT2G14260.1	proline iminopeptidase
30235499	Pavir.Ab03172.1	4327	3	-0.3936	0.761228	0.0146	0.0504	N/A	N/A	N/A
30186971	Pavir.Fa00070.1	2870	3	-0.3934	0.761333	0.0093	0.0348	cell.division	AT3G54670.3	Structural maintenance of chromosomes (SMC) family protein
30293348	Pavir.Ba00161.1	1686	1	-0.3927	0.761703	0.0483	0.1265	not assigned.no ontology	AT3G05500.1	Rubber elongation factor protein (REF)
30271357	Pavir.J25902.1	2293	5	-0.39267	0.761719	<.0001	<.0001	secondary metabolism.flavonoids.dihydroflavonols	AT5G54010.1	UDP-Glycosyltransferase superfamily protein
30312831	Pavir.Eb01085.1	1057	11	-0.39254	0.761787	<.0001	<.0001	transport.metabolite transporters at the mitochondrial membrane	AT5G01500.1	thylakoid ATP/ADP carrier
30247217	Pavir.J06226.1	473	4	-0.3925	0.761808	0.0135	0.0473	RNA.processing.RNA helicase	AT5G26742.1	DEAD box RNA helicase (RH3)
30236826	Pavir.Ib00721.1	2607	8	-0.3922	0.761967	0.0045	0.0194	N/A	AT2G03420.1	N/A
30214619	Pavir.Ia03499.1	441	4	-0.39207	0.762035	<.0001	<.0001	transport.metabolite transporters at the mitochondrial membrane	AT5G46800.1	Mitochondrial substrate carrier family protein
30225620	Pavir.J00604.1	1925	6	-0.3917	0.762231	0.0025	0.0119	N/A	AT4G35510.1	N/A
30239525	Pavir.Ib01141.1	397	42	-0.3896	0.763341	<.0001	<.0001	PS.calvin cycle.FBPase	AT3G54050.1	high cyclic electron flow 1
30231418	Pavir.Ea03987.1	3917	1	-0.389	0.763659	0.1038	0.2218	protein.targeting.secretory pathway.ER	AT2G45140.1	plant VAP homolog 12
30274757	Pavir.J00283.1	3162	5	-0.38747	0.764469	<.0001	<.0001	RNA.regulation of transcription.bHLH.Basic Helix-Loop-Helix family	AT4G02590.1	basic helix-loop-helix (bHLH) DNA-binding superfamily protein
30269198	Pavir.Cb00538.1	4006	1	-0.3868	0.764824	0.5999	0.732	N/A	AT1G09310.1	Protein of unknown function, DUF538
30300176	Pavir.Bb03675.1	1608	1	-0.3861	0.765195	0.117	0.2407	not assigned.no ontology	AT3G05500.1	Rubber elongation factor protein (REF)
30227414	Pavir.Ea03919.1	1611	1	-0.3861	0.765195	0.2022	0.3527	protein.targeting.mitochondria	AT1G27390.1	translocase outer membrane 20-2
30205593	Pavir.Ca01273.1	3096	4	-0.38579	0.76536	0.0005	0.0031	misc.oxidases - copper. flavone etc	AT4G12280.1	copper amine oxidase family protein
30292942	Pavir.Ba00540.1	4919	1	-0.3854	0.765567	0.0793	0.183	not assigned.no ontology	AT5G19850.1	alpha/beta-Hydrolases superfamily protein
30272567	Pavir.J04806.1	2455	6	-0.3849	0.765832	0.0005	0.0031	secondary metabolism.phenylpropanoids.lignin biosynthesis.CCoAOMT	AT4G34050.1	S-adenosyl-L-methionine-dependent methyltransferases superfamily protein
30207466	Pavir.J15022.1	3487	1	-0.3843	0.766151	0.2294	0.385	mitochondrial electron transport / ATP synthesis.NADH-DH.localisation not clear	AT3G62790.1	NADH-ubiquinone oxidoreductase-related
30206685	Pavir.Ca01334.1	3604	2	-0.3837	0.766469	0.007	0.0279	transport.metabolite transporters at the mitochondrial membrane	AT1G55900.1	Haloacid dehalogenase-like hydrolase (HAD) superfamily protein
30300516	Pavir.Bb03284.1	2824	3	-0.38333	0.766666	0.0002	0.0014	C1-metabolism.tetrahydrofolate synthase	AT5G41480.1	Folylpolyglutamate synthetase family protein
30300841	Pavir.Bb00767.1	3104	1	-0.3824	0.76716	0.1098	0.2301	development.unspecified	AT2G37860.3	Protein of unknown function (DUF3411)
30278287	Pavir.Fb00835.1	2423	5	-0.3816	0.767586	0.0118	0.0422	amino acid metabolism.synthesis.central amino acid metabolism.GABA.GABA transaminase	AT3G22200.1	Pyridoxal phosphate (PLP)-dependent transferases superfamily protein
30291655	Pavir.Ba00315.1	4612	1	-0.3815	0.767639	0.0307	0.0895	RNA.regulation of transcription.PWWP domain protein	AT5G02950.1	Tudor/PWWP/MBT superfamily protein
30303871	Pavir.Ga01990.1	988	22	-0.37995	0.768464	<.0001	<.0001	secondary metabolism.isoprenoids.carotenoids.violaxanthin de-epoxidase	AT1G08550.1	non-photochemical quenching 1
30212343	Pavir.Ia03458.1	3122	1	-0.3798	0.768544	0.0889	0.1988	N/A	AT1G04640.1	lipoyltransferase 2
30290579	Pavir.Ba00117.1	3741	1	-0.3794	0.768757	0.1984	0.3478	nucleotide metabolism.degradation	AT4G04880.1	adenosine/AMP deaminase family protein
30202068	Pavir.J18067.1	2666	1	-0.3793	0.768811	0.2594	0.4221	protein.synthesis.ribosomal protein.eukaryotic.60S subunit.L7	AT2G44120.2	Ribosomal protein L30/L7 family protein
30212723	Pavir.Ia01707.1	4334	1	-0.379	0.76897	0.1601	0.2999	N/A	AT2G28430.1	N/A
30188358	Pavir.Fa00441.1	4034	1	-0.3789	0.769024	0.0665	0.1605	signalling.receptor kinases	AT4G35470.1	plant intracellular ras group-related LRR 4
30275270	Pavir.J01104.1	1260	11	-0.37876	0.769098	<.0001	<.0001	signalling.G-proteins	AT5G27540.1	MIRO-related GTP-ase 1
30223660	Pavir.Gb00126.1	4719	1	-0.3775	0.76977	0.1327	0.2641	signalling.calcium	AT1G19870.1	IQ-domain 32
30245858	Pavir.J17000.1	2261	3	-0.37716	0.769952	0.0001	0.0007	N/A	AT5G38660.1	acclimation of photosynthesis to environment
30220829	Pavir.J25955.1	4925	1	-0.377	0.770037	0.0823	0.1881	RNA.processing.splicing	AT4G03430.1	pre-mRNA splicing factor-related
30227194	Pavir.Ea02003.1	2144	2	-0.3755	0.770838	0.1073	0.2268	protein.targeting.chloroplast	AT4G01800.1	Albino or Glassy Yellow 1
30279676	Pavir.Fb00336.1	4359	2	-0.3749	0.771159	0.0598	0.1487	N/A	ATCG00600.1	PETG
30206616	Pavir.Ca01180.1	4772	1	-0.3748	0.771212	0.0655	0.1586	hormone metabolism.ethylene.synthesis-degradation.1-aminocyclopropane-1-carboxylate oxidase	AT1G77330.1	2-oxoglutarate (2OG) and Fe(II)-dependent oxygenase superfamily protein
30199571	Pavir.J02952.1	2110	3	-0.3745	0.771373	0.0144	0.0498	nucleotide metabolism.synthesis.purine.amidophosphoribosyltransferase	AT2G16570.1	GLN phosphoribosyl pyrophosphate amidotransferase 1
30219167	Pavir.J14284.1	3899	2	-0.3745	0.771373	0.0442	0.118	protein.postranslational modification	AT2G33700.1	Protein phosphatase 2C family protein
30199084	Pavir.J08773.1	2346	2	-0.3731	0.772122	0.0098	0.0362	PS.calvin cycle.rubisco interacting	AT1G14030.1	Rubisco methyltransferase family protein
30187570	Pavir.Fa02279.1	3711	1	-0.371	0.773246	0.1465	0.2815	RNA.regulation of transcription.unclassified	AT3G18640.1	Zinc finger C-x8-C-x5-C-x3-H type family protein
30185266	Pavir.J29868.1	3641	2	-0.37028	0.773632	0.0008	0.0046	not assigned.no ontology	AT2G33255.1	Haloacid dehalogenase-like hydrolase (HAD) superfamily protein
30289580	Pavir.Ba01861.1	1439	14	-0.36971	0.773938	<.0001	<.0001	N/A	AT3G43540.1	Protein of unknown function (DUF1350)
30256604	Pavir.J00955.1	4240	1	-0.3692	0.774212	0.0249	0.0763	amino acid metabolism.synthesis.aspartate family.methionine.cystathionine beta-lyase	AT3G57050.1	cystathionine beta-lyase
30294680	Pavir.J01737.1	2799	3	-0.3684	0.774641	0.0149	0.0512	cell.organisation	AT3G55005.1	tonneau 1b (TON1b)
30241587	Pavir.Ib02937.1	1887	2	-0.368	0.774856	0.0086	0.0328	secondary metabolism.flavonoids.chalcones	AT1G59960.1	NAD(P)-linked oxidoreductase superfamily protein
30248405	Pavir.J01931.1	2920	1	-0.3675	0.775125	0.3592	0.5247	N/A	AT4G18150.1	Kinase-related protein of unknown function (DUF1296)
30266762	Pavir.Hb01394.1	2728	2	-0.3669	0.775447	0.0414	0.112	major CHO metabolism.synthesis.sucrose.SPS	AT4G10120.1	Sucrose-phosphate synthase family protein
30269410	Pavir.Cb00443.1	4747	1	-0.3657	0.776092	0.2943	0.46	transport.misc	AT2G26510.1	Xanthine/uracil permease family protein
30223987	Pavir.Gb01474.1	1160	1	-0.3656	0.776146	0.2218	0.3762	N/A	AT3G12640.1	RNA binding (RRM/RBD/RNP motifs) family protein
30236398	Pavir.Ab03234.1	1382	2	-0.3655	0.7762	0.0835	0.19	mitochondrial electron transport / ATP synthesis.NADH-DH.localisation not clear	AT2G20360.1	NAD(P)-binding Rossmann-fold superfamily protein
30232249	Pavir.Ab02838.1	3040	3	-0.3653	0.776307	0.0088	0.0333	amino acid metabolism.synthesis.histidine.histidinol-phosphate aminotransferase	AT5G10330.1	histidinol phosphate aminotransferase 1
30191168	Pavir.J01051.1	3987	2	-0.3644	0.776792	0.0011	0.006	misc.gluco-. galacto- and mannosidases	AT1G02850.2	beta glucosidase 11
30243199	Pavir.J01025.1	4912	1	-0.3641	0.776953	0.204	0.3551	protein.targeting.secretory pathway.vacuole	AT1G75850.1	VPS35 homolog B
30270360	Pavir.Cb01327.1	3778	4	-0.36323	0.777422	<.0001	<.0001	N/A	N/A	N/A
30205294	Pavir.Ca02041.1	2285	5	-0.3632	0.777438	0.0007	0.0041	major CHO metabolism.degradation.starch.glucan water dikinase	AT5G26570.1	catalytics;carbohydrate kinases;phosphoglucan, water dikinases
30187589	Pavir.Fa01243.1	4464	1	-0.3626	0.777762	0.0458	0.1215	not assigned.no ontology	AT4G30490.1	AFG1-like ATPase family protein
30304584	Pavir.Ga00421.1	177	76	-0.36249	0.777821	<.0001	<.0001	PS.photorespiration.glycine cleavage.T subunit	AT1G11860.1	Glycine cleavage T-protein family
30293088	Pavir.Ba01978.1	414	9	-0.3622	0.777977	<.0001	<.0001	glycolysis.plastid branch.glucose-6-phosphate isomerase	AT4G24620.1	phosphoglucose isomerase 1
30268409	Pavir.Cb01681.1	4120	2	-0.3605	0.778895	0.0775	0.1794	protein.postranslational modification	AT5G13530.1	protein kinases;ubiquitin-protein ligases
30185151	Pavir.J00145.1	4590	2	-0.3602	0.779057	0.0099	0.0365	redox.misc	AT5G17770.1	NADH:cytochrome B5 reductase 1
30211482	Pavir.Ia02331.1	3660	1	-0.3598	0.779273	0.0464	0.1226	signalling.phosphinositides.inositol-1.3.4-trisphosphate 5/6-kinase	AT5G16760.1	Inositol 1,3,4-trisphosphate 5/6-kinase family protein
30185413	Pavir.J37334.1	2847	1	-0.3592	0.779597	0.4087	0.5716	RNA.regulation of transcription	AT1G79730.1	hydroxyproline-rich glycoprotein family protein
30230647	Pavir.Ea02858.1	3510	3	-0.3588	0.779813	0.0112	0.0405	protein.synthesis.elongation	AT2G31060.2	elongation factor family protein
30263058	Pavir.Db02232.1	2011	4	-0.35857	0.779937	0.0002	0.0014	N/A	AT5G27560.1	Domain of unknown function (DUF1995)
30253897	Pavir.Aa02779.1	1742	7	-0.3573	0.780624	0.0008	0.0046	misc.peroxidases	AT5G05340.1	Peroxidase superfamily protein
30267881	Pavir.Cb00991.1	2413	4	-0.3571	0.780732	0.0134	0.047	C1-metabolism.glycine hydroxymethyltransferase	AT4G13930.1	serine hydroxymethyltransferase 4
30305030	Pavir.Ga02060.1	3802	2	-0.3568	0.780895	0.0439	0.1174	N/A	N/A	N/A
30206011	Pavir.Ca00590.1	3175	3	-0.35646	0.781079	0.0014	0.0073	nucleotide metabolism.phosphotransfer and pyrophosphatases.uridylate kinase	AT5G26667.1	P-loop containing nucleoside triphosphate hydrolases superfamily protein
30269914	Pavir.Cb00876.1	4137	2	-0.3561	0.781274	0.0651	0.1582	signalling.misc	AT3G05490.1	ralf-like 22
30242248	Pavir.Ib03224.1	3511	1	-0.3559	0.781382	0.1397	0.2732	protein.targeting.mitochondria	AT3G46560.1	Tim10/DDP family zinc finger protein
30291800	Pavir.Ba00978.1	2921	5	-0.35538	0.781664	0.0002	0.0014	amino acid metabolism.synthesis.aromatic aa.tryptophan	AT4G11610.1	C2 calcium/lipid-binding plant phosphoribosyltransferase family protein
30207094	Pavir.Ca02037.1	2855	4	-0.3546	0.782086	0.0129	0.0456	RNA.regulation of transcription.C3H zinc finger family	AT3G02830.1	zinc finger protein 1
30236756	Pavir.Ib02870.1	3623	2	-0.3546	0.782086	0.0644	0.1568	N/A	AT5G49970.1	pyridoxin (pyrodoxamine) 5\'-phosphate oxidase
30279087	Pavir.Fb01256.1	3195	5	-0.35422	0.782292	0.0007	0.0041	misc.acid and other phosphatases	AT3G01510.1	like SEX4 1
30244983	Pavir.J22349.1	3669	1	-0.3539	0.782466	0.2058	0.3571	N/A	N/A	N/A
30223065	Pavir.Gb00618.1	3903	3	-0.3539	0.782466	0.1155	0.2383	redox.thioredoxin	AT5G08410.1	ferredoxin/thioredoxin reductase subunit A (variable subunit) 2
30208446	Pavir.J13280.1	1698	10	-0.35373	0.782558	<.0001	<.0001	misc.misc2	AT1G35420.2	alpha/beta-Hydrolases superfamily protein
30226063	Pavir.Ea00788.1	3664	2	-0.3526	0.783171	0.0114	0.0411	N/A	AT1G27510.1	Protein of unknown function (DUF3506)
30209772	Pavir.Ia00869.1	227	37	-0.35168	0.783671	<.0001	<.0001	mitochondrial electron transport / ATP synthesis.NADH-DH.localisation not clear	AT5G37510.1	NADH-ubiquinone dehydrogenase, mitochondrial, putative
30314072	Pavir.Eb03119.1	4261	1	-0.351	0.78404	0.2703	0.4347	not assigned.no ontology.S RNA-binding domain-containing protein	AT1G53120.1	RNA-binding S4 domain-containing protein
30313276	Pavir.Eb01104.1	2955	8	-0.34934	0.784943	<.0001	<.0001	not assigned.no ontology	AT5G04990.1	SAD1/UNC-84 domain protein 1
30296605	Pavir.Bb02126.1	2564	1	-0.3483	0.785509	0.0427	0.1149	transport.misc	AT5G63060.1	Sec14p-like phosphatidylinositol transfer family protein
30204691	Pavir.Ca01121.1	2029	2	-0.3474	0.785999	0.0058	0.0238	misc.peroxidases	AT5G66390.1	Peroxidase superfamily protein
30291172	Pavir.Ba01181.1	3312	4	-0.3472	0.786108	0.0072	0.0285	lipid metabolism.lipid degradation.lysophospholipases.phospholipase D	AT4G35790.2	phospholipase D delta
30299683	Pavir.Bb02325.1	4063	2	-0.3465	0.78649	0.1332	0.2649	lipid metabolism.lipid degradation.lysophospholipases.carboxylesterase	AT1G47480.1	alpha/beta-Hydrolases superfamily protein
30312072	Pavir.Eb03592.1	4394	1	-0.3464	0.786544	0.3229	0.4862	hormone metabolism.auxin.signal transduction	AT5G07120.1	sorting nexin 2B
30187786	Pavir.Fa01989.1	3876	1	-0.3464	0.786544	0.0206	0.0665	secondary metabolism.flavonoids.anthocyanins.anthocyanin 5-aromatic acyltransferase	AT5G39050.1	HXXXD-type acyl-transferase family protein
30263689	Pavir.J36212.1	1380	7	-0.34629	0.786604	<.0001	<.0001	major CHO metabolism.synthesis.starch.starch branching	AT5G03650.1	starch branching enzyme 2.2
30221597	Pavir.Gb00078.1	3467	2	-0.3462	0.786653	0.094	0.207	DNA.synthesis/chromatin structure	AT3G18630.1	uracil dna glycosylase
30227321	Pavir.Ea00845.1	3182	2	-0.3461	0.786708	0.1941	0.3432	signalling.light	AT3G26740.1	CCR-like
30251199	Pavir.Aa00880.1	2031	2	-0.346	0.786762	0.0275	0.0824	secondary metabolism.isoprenoids.non-mevalonate pathway.geranylgeranyl pyrophosphate synthase	AT4G38460.1	geranylgeranyl reductase
30251480	Pavir.Aa00181.1	2033	2	-0.3452	0.787199	0.1101	0.2304	transport.H+ transporting pyrophosphatase	AT1G15690.1	Inorganic H pyrophosphatase family protein
30252379	Pavir.Aa00423.1	4322	1	-0.3448	0.787417	0.5146	0.6623	protein.degradation	AT5G51740.1	Peptidase family M48 family protein
30245394	Pavir.J19473.1	2554	4	-0.34446	0.787603	0.0001	0.0007	misc.peroxidases	AT4G37530.1	Peroxidase superfamily protein
30237335	Pavir.Ib03729.1	3009	4	-0.3436	0.788072	0.058	0.1451	cell.organisation	AT2G46910.1	Plastid-lipid associated protein PAP / fibrillin family protein
30217879	Pavir.J06248.1	998	4	-0.34358	0.788083	<.0001	<.0001	amino acid metabolism.synthesis.central amino acid metabolism.aspartate.aspartate aminotransferase	AT2G30970.1	aspartate aminotransferase 1
30269220	Pavir.Cb00841.1	2368	1	-0.3432	0.788291	0.1814	0.3279	N/A	AT5G61030.1	glycine-rich RNA-binding protein 3
30301739	Pavir.J01843.1	1872	2	-0.3427	0.788564	0.0738	0.173	protein.degradation.serine protease	AT2G47940.1	DEGP protease 2
30217391	Pavir.J18609.1	2101	10	-0.34268	0.788575	<.0001	<.0001	RNA.regulation of transcription.putative transcription regulator	AT2G41870.1	Remorin family protein
30188745	Pavir.Fa00016.1	2372	9	-0.34251	0.788668	<.0001	<.0001	RNA.regulation of transcription.C2H2 zinc finger family	AT2G02070.1	indeterminate(ID)-domain 5
30281974	Pavir.J06144.1	4654	1	-0.3424	0.788728	0.0843	0.1915	N/A	N/A	N/A
30235576	Pavir.Ab01211.1	1280	6	-0.34051	0.789762	0.0006	0.0035	misc.peroxidases	AT5G05340.1	Peroxidase superfamily protein
30239412	Pavir.Ib01665.1	2753	4	-0.3404	0.789822	0.1091	0.2291	protein.targeting.nucleus	AT2G41620.1	Nucleoporin interacting component (Nup93/Nic96-like) family protein
30277198	Pavir.J03131.1	4545	3	-0.34014	0.789965	0.0005	0.0031	RNA.regulation of transcription.TCP transcription factor family	AT3G27010.1	TEOSINTE BRANCHED 1, cycloidea, PCF (TCP)-domain family protein 20
30260336	Pavir.Db00587.1	758	2	-0.3392	0.79048	0.0892	0.1994	major CHO metabolism.degradation.starch.glucan water dikinase	AT1G10760.1	Pyruvate phosphate dikinase, PEP/pyruvate binding domain
30241057	Pavir.Ib00171.1	2731	5	-0.33897	0.790606	0.0003	0.002	RNA.processing.splicing	AT3G55220.1	Cleavage and polyadenylation specificity factor (CPSF) A subunit protein
30304685	Pavir.Ga02580.1	1142	1	-0.3387	0.790754	0.102	0.2198	N/A	AT4G00830.3	RNA-binding (RRM/RBD/RNP motifs) family protein
30305111	Pavir.Ga00645.1	1437	18	-0.33868	0.790764	0.0004	0.0025	N/A	AT2G44760.1	Domain of unknown function (DUF3598)
30203129	Pavir.Ca01390.1	4121	1	-0.3386	0.790808	0.1087	0.2285	RNA.regulation of transcription.unclassified	AT4G11060.1	mitochondrially targeted single-stranded DNA binding protein
30196297	Pavir.J15933.1	1697	4	-0.33853	0.790847	0.0012	0.0064	hormone metabolism.auxin.induced-regulated-responsive-activated	AT1G60690.1	NAD(P)-linked oxidoreductase superfamily protein
30238162	Pavir.Ib03645.1	3353	1	-0.3384	0.790918	0.5464	0.688	RNA.processing.splicing	AT3G19840.1	pre-mRNA-processing protein 40C
30318201	Pavir.Ha00455.1	2548	7	-0.3383	0.790973	0.0047	0.0201	protein.degradation.ubiquitin.E3.SCF.FBOX	AT5G50270.1	F-box/RNI-like/FBD-like domains-containing protein
30256188	Pavir.J12066.1	984	8	-0.3374	0.791466	0.1841	0.3307	N/A	AT3G47070.1	N/A
30254808	Pavir.J24945.1	4191	1	-0.33707	0.791647	0.0056	0.0231	development.unspecified	AT3G19240.1	Vacuolar import/degradation, Vid27-related protein
30241690	Pavir.Ib00341.1	2906	2	-0.33667	0.791867	0.0041	0.018	N/A	AT5G20190.1	Tetratricopeptide repeat (TPR)-like superfamily protein
30309915	Pavir.Eb03854.1	4221	2	-0.3362	0.792125	0.0678	0.1627	N/A	AT1G19370.1	N/A
30237029	Pavir.Ib00013.1	3502	2	-0.3344	0.793114	0.1924	0.3418	protein.degradation.ubiquitin.E2	AT3G57870.1	sumo conjugation enzyme 1
30224391	Pavir.Gb00738.1	594	19	-0.33437	0.79313	<.0001	<.0001	RNA.regulation of transcription.putative transcription regulator	AT3G61260.1	Remorin family protein
30226704	Pavir.Ea03285.1	4501	1	-0.3341	0.793279	0.2011	0.3512	misc.GDSL-motif lipase	AT1G58430.1	GDSL-like Lipase/Acylhydrolase family protein
30240190	Pavir.Ib03835.1	2902	2	-0.3339	0.793389	0.0088	0.0333	not assigned.no ontology.pentatricopeptide (PPR) repeat-containing protein	AT1G10270.1	glutamine-rich protein 23
30317850	Pavir.Ha01691.1	4328	2	-0.3338	0.793444	0.1792	0.3258	N/A	N/A	N/A
30309417	Pavir.Eb03026.1	3065	3	-0.3337	0.793499	0.004	0.0177	stress.biotic	AT1G78780.2	pathogenesis-related family protein
30226019	Pavir.Ea01927.1	4184	1	-0.3334	0.793664	0.3546	0.5193	DNA.repair	AT3G04880.1	DNA-damage-repair/toleration protein (DRT102)
30212105	Pavir.Ia03125.1	1529	2	-0.33329	0.793724	0.0037	0.0165	amino acid metabolism.synthesis.aromatic aa.chorismate.3-deoxy-D-arabino-heptulosonate 7-phosphate synthase	AT1G22410.1	Class-II DAHP synthetase family protein
30215553	Pavir.Ia01553.1	21	79	-0.33317	0.79379	<.0001	<.0001	TCA / org transformation.other organic acid transformatons.malic	AT4G00570.1	NAD-dependent malic enzyme 2
30306182	Pavir.J02478.1	2039	1	-0.3325	0.794159	0.1093	0.2294	amino acid metabolism.synthesis.central amino acid metabolism.aspartate.aspartate aminotransferase	AT2G22250.2	aspartate aminotransferase
30225445	Pavir.J05429.1	4157	2	-0.3325	0.794159	0.0782	0.1807	N/A	AT3G10370.1	FAD-dependent oxidoreductase family protein
30315894	Pavir.J07719.1	1582	2	-0.3314	0.794765	0.0394	0.1078	signalling.calcium	AT5G03040.1	IQ-domain 2
30216203	Pavir.J01623.1	3362	3	-0.3313	0.79482	0.0462	0.1223	not assigned.no ontology	AT5G05520.1	Outer membrane OMP85 family protein
30197651	Pavir.J21371.1	2010	5	-0.3312	0.794875	0.0073	0.0288	misc.glutathione S transferases	AT3G62760.1	Glutathione S-transferase family protein
30189721	Pavir.J15638.1	2926	2	-0.3305	0.795261	0.0225	0.0708	RNA.regulation of transcription.zf-HD	AT2G02540.1	homeobox protein 21
30287593	Pavir.J16725.1	3482	3	-0.3301	0.795481	0.0096	0.0358	misc.nitrilases. *nitrile lyases. berberine bridge enzymes. reticuline oxidases. troponine reductases	AT5G44410.1	FAD-binding Berberine family protein
30205268	Pavir.Ca00463.1	4132	2	-0.3286	0.796309	0.0092	0.0346	not assigned.no ontology	AT3G10840.1	alpha/beta-Hydrolases superfamily protein
30296584	Pavir.Bb02298.1	1229	13	-0.32849	0.79637	<.0001	<.0001	development.unspecified	AT5G43070.1	WPP domain protein 1
30301370	Pavir.Bb00368.1	3509	3	-0.328	0.79664	0.0101	0.0371	RNA.processing	AT3G03710.1	polyribonucleotide nucleotidyltransferase, putative
30260369	Pavir.Db00811.1	4523	2	-0.3279	0.796695	0.2698	0.4342	misc.beta 1.3 glucan hydrolases.glucan endo-1.3-beta-glucosidase	AT2G26600.1	Glycosyl hydrolase superfamily protein
30226638	Pavir.Ea03538.1	1398	6	-0.3279	0.796695	0.0027	0.0127	N/A	AT3G48500.1	Nucleic acid-binding, OB-fold-like protein
30277156	Pavir.J04710.1	4292	1	-0.3276	0.796861	0.0862	0.1944	cell wall.cell wall proteins.LRR	AT4G13340.1	Leucine-rich repeat (LRR) family protein
30309150	Pavir.Eb00115.1	2891	5	-0.32699	0.797198	<.0001	<.0001	nucleotide metabolism.synthesis.purine.AIR carboxylase	AT2G37690.1	phosphoribosylaminoimidazole carboxylase, putative / AIR carboxylase, putative
30263775	Pavir.J32574.1	2854	2	-0.32641	0.797519	0.0021	0.0103	misc.short chain dehydrogenase/reductase (SDR)	AT3G61220.1	NAD(P)-binding Rossmann-fold superfamily protein
30205719	Pavir.Ca01174.1	3381	3	-0.3256	0.797966	0.0313	0.0906	protein.aa activation.phenylalanine-tRNA ligase	AT1G72550.1	tRNA synthetase beta subunit family protein
30230506	Pavir.Ea00206.1	1779	2	-0.3255	0.798022	0.0898	0.2	signalling.G-proteins	AT3G63130.1	RAN GTPase activating protein 1
30192893	Pavir.Da02237.1	3273	2	-0.3253	0.798132	0.0086	0.0328	N/A	AT2G17695.1	N/A
30232301	Pavir.Ab01805.1	3020	4	-0.32496	0.798321	<.0001	<.0001	stress.abiotic.unspecified	AT3G10080.1	RmlC-like cupins superfamily protein
30254163	Pavir.J02997.1	3320	1	-0.3249	0.798354	0.2569	0.4186	cell wall.degradation.cellulases and beta -1.4-glucanases	AT3G47000.1	Glycosyl hydrolase family protein
30228224	Pavir.Ea02363.1	1120	6	-0.324	0.798852	0.0031	0.0143	PS.lightreaction.ATP synthase	AT2G31040.1	ATP synthase protein I -related
30289452	Pavir.Ba01256.1	1921	11	-0.32358	0.799085	<.0001	<.0001	N/A	AT4G24090.1	N/A
30311303	Pavir.Eb00119.1	4615	1	-0.323	0.799406	0.3802	0.5459	RNA.regulation of transcription.putative transcription regulator	AT2G33620.1	AT hook motif DNA-binding family protein
30223156	Pavir.Gb00574.1	1324	2	-0.32291	0.799456	0.0003	0.002	misc.short chain dehydrogenase/reductase (SDR)	AT3G12800.1	short-chain dehydrogenase-reductase B
30240355	Pavir.Ib00606.1	2013	3	-0.32263	0.799611	0.0039	0.0173	major CHO metabolism.degradation.starch.laforin like phosphoglucan phosphatase (SEX4)	AT3G52180.1	dual specificity protein phosphatase (DsPTP1) family protein
30297876	Pavir.Bb01710.1	4367	1	-0.3226	0.799628	0.3226	0.4859	RNA.processing.3' end processing.Pcf11p	AT2G36480.1	ENTH/VHS family protein
30217304	Pavir.J05040.1	1525	11	-0.32257	0.799644	0.0006	0.0035	C1-metabolism.5-formyltetrahydrofolate cyclo-ligase	AT1G76730.1	NagB/RpiA/CoA transferase-like superfamily protein
30310525	Pavir.Eb02683.1	3145	3	-0.32224	0.799827	0.0002	0.0014	protein.degradation	AT5G46390.2	Peptidase S41 family protein
30215244	Pavir.Ia00078.1	595	7	-0.3222	0.799849	0.0016	0.0081	PS.lightreaction.cyclic electron flow-chlororespiration	AT4G22890.5	PGR5-LIKE A
30185591	Pavir.Fa01630.1	4348	1	-0.3221	0.799905	0.0877	0.197	not assigned.no ontology	AT1G23890.2	NHL domain-containing protein
30250569	Pavir.Aa02113.1	4366	2	-0.3219	0.800016	0.0423	0.1139	protein.synthesis.elongation	AT5G13650.2	elongation factor family protein
30241120	Pavir.Ib03416.1	2581	11	-0.32182	0.80006	<.0001	<.0001	misc.oxidases - copper. flavone etc	AT3G03080.1	Zinc-binding dehydrogenase family protein
30208002	Pavir.J27089.1	4267	1	-0.3217	0.800126	0.0621	0.1528	N/A	AT5G05200.1	Protein kinase superfamily protein
30241775	Pavir.Ib01667.1	3948	1	-0.3214	0.800293	0.4048	0.5674	protein.synthesis.ribosome biogenesis.Pre-rRNA processing and modifications.snoRNPs	AT3G05060.1	NOP56-like pre RNA processing ribonucleoprotein
30254558	Pavir.J00228.1	1488	11	-0.32139	0.800298	<.0001	<.0001	misc.UDP glucosyl and glucoronyl transferases	AT2G15480.2	UDP-glucosyl transferase 73B5
30302521	Pavir.Ga01874.1	3363	2	-0.3209	0.80057	0.0176	0.0585	protein.degradation.ubiquitin	AT1G43690.1	ubiquitin interaction motif-containing protein
30214889	Pavir.Ia04882.1	4090	1	-0.3207	0.800681	0.16	0.2999	cell wall.cell wall proteins.HRGP	AT4G14900.1	FRIGIDA-like protein
30191837	Pavir.Da02164.1	1279	5	-0.3195	0.801348	0.0837	0.1903	DNA.repair	AT1G30480.1	D111/G-patch domain-containing protein
30299827	Pavir.Bb02815.1	3701	3	-0.319	0.801625	0.0281	0.0836	not assigned.no ontology	AT4G18060.1	SH3 domain-containing protein
30247000	Pavir.J11540.1	3875	3	-0.3187	0.801792	0.0135	0.0473	amino acid metabolism.synthesis.central amino acid metabolism.GABA.gamma-hydroxybutyrate DH	AT1G17650.1	glyoxylate reductase 2
30207644	Pavir.J24171.1	3375	1	-0.3175	0.802459	0.1222	0.2481	transport.peptides and oligopeptides	AT1G22540.1	Major facilitator superfamily protein
30185788	Pavir.Fa02159.1	43	189	-0.31672	0.802893	<.0001	<.0001	nucleotide metabolism.phosphotransfer and pyrophosphatases.adenylate kinase	AT5G47840.1	adenosine monophosphate kinase
30234234	Pavir.Ab02439.1	3393	3	-0.3159	0.80335	0.0062	0.0252	development.late embryogenesis abundant	AT3G50790.1	esterase/lipase/thioesterase family protein
30303877	Pavir.Ga00329.1	4777	1	-0.3153	0.803684	0.0893	0.1994	lipid metabolism.FA synthesis and FA elongation.ketoacyl ACP synthase	AT1G62640.1	3-ketoacyl-acyl carrier protein synthase III
30289516	Pavir.Ba01956.1	4580	2	-0.3149	0.803907	0.1166	0.24	transport.metabolite transporters at the mitochondrial membrane	AT5G64290.1	dicarboxylate transport 2.1
30232104	Pavir.Ab02990.1	1684	4	-0.31462	0.804063	0.0037	0.0165	major CHO metabolism.synthesis.starch.starch synthase	AT3G01180.1	starch synthase 2
30250654	Pavir.Aa00784.1	1911	4	-0.31445	0.804158	0.0024	0.0115	mitochondrial electron transport / ATP synthesis.alternative oxidase	AT3G22370.1	alternative oxidase 1A
30197503	Pavir.J22292.1	1827	10	-0.31432	0.80423	<.0001	<.0001	secondary metabolism.flavonoids.dihydroflavonols	AT1G01420.1	UDP-glucosyl transferase 72B3
30269945	Pavir.Cb00504.1	77	3	-0.3141	0.804353	0.0163	0.055	stress.abiotic.heat	AT3G12580.1	heat shock protein 70
30266732	Pavir.Hb01734.1	176	6	-0.31356	0.804654	<.0001	<.0001	PS.calvin cycle.aldolase	AT2G21330.1	fructose-bisphosphate aldolase 1
30201867	Pavir.J20529.1	495	3	-0.3131	0.80491	0.0118	0.0422	gluconeogenesis / glyoxylate cycle.Malate DH	AT5G09660.1	peroxisomal NAD-malate dehydrogenase 2
30212945	Pavir.Ia00044.1	3504	2	-0.31285	0.80505	0.0028	0.0131	misc.short chain dehydrogenase/reductase (SDR)	AT3G01980.1	NAD(P)-binding Rossmann-fold superfamily protein
30309394	Pavir.Eb00987.1	1372	9	-0.3127	0.805134	0.0032	0.0147	protein.targeting.nucleus	AT1G71480.1	Nuclear transport factor 2 (NTF2) family protein
30234100	Pavir.Ab00395.1	2882	4	-0.3126	0.805189	0.0079	0.0307	RNA.processing.RNA helicase	AT5G51280.1	DEAD-box protein abstrakt, putative
30297760	Pavir.Bb00286.1	4579	2	-0.3124	0.805301	0.0195	0.0636	transport.sugars	AT1G30220.1	inositol transporter 2
30204537	Pavir.Ca02859.1	1710	3	-0.3119	0.80558	0.0071	0.0282	RNA.regulation of transcription.Methyl binding domain proteins	AT1G15340.1	methyl-CPG-binding domain 10
30239598	Pavir.Ib00478.1	1988	10	-0.31153	0.805787	<.0001	<.0001	N/A	AT2G26340.1	N/A
30196609	Pavir.J10088.1	3611	2	-0.3103	0.806474	0.3874	0.5518	N/A	AT1G73940.1	N/A
30220382	Pavir.J00089.1	4299	1	-0.3096	0.806865	0.2377	0.3945	protein.degradation.subtilases	AT3G14067.1	Subtilase family protein
30232951	Pavir.Ab03000.1	1751	1	-0.3093	0.807033	0.4922	0.6446	N/A	AT5G61910.3	DCD (Development and Cell Death) domain protein
30308942	Pavir.Eb03274.1	3498	2	-0.3088	0.807313	0.0744	0.1741	not assigned.no ontology	AT5G65770.1	little nuclei4
30261410	Pavir.Db02336.1	1311	4	-0.3085	0.807481	0.0092	0.0346	tetrapyrrole synthesis.magnesium protoporphyrin IX methyltransferase	AT4G25080.1	magnesium-protoporphyrin IX methyltransferase
30270544	Pavir.J22013.1	4462	1	-0.3083	0.807593	0.07	0.1667	not assigned.no ontology.pentatricopeptide (PPR) repeat-containing protein	AT2G20540.1	mitochondrial editing factor 21
30204774	Pavir.Ca01196.1	2489	7	-0.30825	0.807621	<.0001	<.0001	not assigned.no ontology.pentatricopeptide (PPR) repeat-containing protein	AT4G35850.1	Pentatricopeptide repeat (PPR) superfamily protein
30299172	Pavir.Bb01323.1	1944	8	-0.308	0.807761	0.0062	0.0252	development.unspecified	AT4G16280.4	RNA binding;abscisic acid binding
30237560	Pavir.Ib03220.1	4111	1	-0.3078	0.807873	0.2523	0.4129	RNA.processing.splicing	AT3G19840.1	pre-mRNA-processing protein 40C
30266283	Pavir.Hb00605.1	4828	1	-0.3075	0.808041	0.3345	0.4968	N/A	AT3G22430.1	N/A
30312900	Pavir.Eb01487.1	3837	3	-0.30707	0.808282	0.0037	0.0165	misc.glutathione S transferases	AT3G62760.1	Glutathione S-transferase family protein
30280088	Pavir.Fb01942.1	1147	19	-0.30678	0.808444	<.0001	<.0001	N/A	AT3G57990.1	N/A
30212336	Pavir.Ia04642.1	3963	1	-0.3067	0.808489	0.2692	0.4336	redox.ascorbate and glutathione	AT4G14965.1	membrane-associated progesterone binding protein 4
30227923	Pavir.Ea01561.1	2019	4	-0.3062	0.808769	0.0277	0.0828	signalling.receptor kinases.DUF 26	AT4G23180.1	cysteine-rich RLK (RECEPTOR-like protein kinase) 10
30247837	Pavir.J32490.1	2369	1	-0.3059	0.808937	0.4693	0.626	nucleotide metabolism.synthesis.purine.AICAR transformylase	AT2G35040.1	AICARFT/IMPCHase bienzyme family protein
30206347	Pavir.Ca00901.1	3980	1	-0.3057	0.80905	0.3315	0.4942	N/A	AT4G28910.1	novel interactor of JAZ
30238055	Pavir.Ib00492.1	3946	1	-0.3057	0.80905	0.1424	0.277	DNA.synthesis/chromatin structure	AT2G26280.1	CTC-interacting domain 7
30239798	Pavir.Ib02297.1	846	1	-0.3057	0.80905	0.1497	0.2852	transport.metabolite transporters at the mitochondrial membrane	AT5G46800.1	Mitochondrial substrate carrier family protein
30287574	Pavir.J21223.1	3330	2	-0.3056	0.809106	0.0251	0.0769	RNA.processing	AT3G03710.1	polyribonucleotide nucleotidyltransferase, putative
30218843	Pavir.J35213.1	2381	7	-0.3054	0.809218	<.0001	<.0001	cell.organisation	AT5G10470.2	kinesin like protein for actin based chloroplast movement 1
30300715	Pavir.Bb01334.1	2514	4	-0.3051	0.809386	0.0175	0.0582	RNA.regulation of transcription.HB.Homeobox transcription factor family	AT3G18380.1	sequence-specific DNA binding transcription factors;sequence-specific DNA binding
30290826	Pavir.Ba00168.1	599	22	-0.3051	0.809386	<.0001	<.0001	misc.peroxidases	AT5G05340.1	Peroxidase superfamily protein
30209486	Pavir.Ia04058.1	2329	5	-0.30474	0.809588	0.0013	0.0069	not assigned.no ontology	AT1G56500.1	haloacid dehalogenase-like hydrolase family protein
30294664	Pavir.J06387.1	3813	1	-0.3046	0.809667	0.0885	0.1984	signalling.light	AT5G65540.1	N/A
30270236	Pavir.Cb00208.1	3063	4	-0.3045	0.809723	0.0085	0.0326	amino acid metabolism.synthesis.aspartate family.lysine.diaminopimelate decarboxylase	AT3G14390.1	Pyridoxal-dependent decarboxylase family protein
30234798	Pavir.Ab01674.1	4910	1	-0.3041	0.809947	0.0889	0.1988	N/A	AT1G28510.1	Optic atrophy 3 protein (OPA3)
30186677	Pavir.Fa01369.1	2949	5	-0.30369	0.810178	0.0001	0.0007	nucleotide metabolism.phosphotransfer and pyrophosphatases.adenylate kinase	AT5G35170.1	adenylate kinase family protein
30265931	Pavir.Hb00223.1	2083	2	-0.3035	0.810284	0.1357	0.2676	N/A	N/A	N/A
30306560	Pavir.J08581.1	750	7	-0.30341	0.810335	<.0001	<.0001	N/A	AT4G15545.1	N/A
30313961	Pavir.Eb00763.1	4624	1	-0.3031	0.810509	0.3096	0.4742	N/A	AT1G19240.1	N/A
30317441	Pavir.Ha00706.1	4213	2	-0.3023	0.810959	0.0986	0.214	protein.targeting.secretory pathway.golgi	AT3G23660.1	Sec23/Sec24 protein transport family protein
30298364	Pavir.Bb00277.1	1851	10	-0.30217	0.811032	<.0001	<.0001	PS.lightreaction.photosystem I.PSI polypeptide subunits	AT1G30380.1	photosystem I subunit K
30284766	Pavir.J06297.1	3842	4	-0.3021	0.811071	0.0281	0.0836	misc.UDP glucosyl and glucoronyl transferases	AT3G16520.3	UDP-glucosyl transferase 88A1
30292050	Pavir.Ba01318.1	1367	8	-0.30191	0.811178	<.0001	<.0001	hormone metabolism.salicylic acid.synthesis-degradation.synthesis.SA glucosyltransferase ester and ether bond making SGE. SAG	AT2G43820.1	UDP-glucosyltransferase 74F2
30197425	Pavir.J01235.1	4557	1	-0.3019	0.811183	0.0763	0.1774	N/A	AT1G53580.1	glyoxalase II 3
30251450	Pavir.Aa00699.1	3444	2	-0.3018	0.81124	0.0105	0.0382	N/A	AT5G55710.1	N/A
30214939	Pavir.Ia01731.1	4319	1	-0.3017	0.811296	0.1029	0.2209	protein.postranslational modification	AT1G54450.1	Calcium-binding EF-hand family protein
30318153	Pavir.Ha01822.1	476	18	-0.30107	0.81165	<.0001	<.0001	RNA.regulation of transcription.HB.Homeobox transcription factor family	AT2G35940.1	BEL1-like homeodomain 1
30194207	Pavir.Da02259.1	4330	1	-0.301	0.81169	0.225	0.38	misc.oxygenases	AT2G17970.1	2-oxoglutarate (2OG) and Fe(II)-dependent oxygenase superfamily protein
30281900	Pavir.J03150.1	4313	1	-0.3008	0.811802	0.3053	0.4708	transport.p- and v-ATPases	AT2G28520.1	vacuolar proton ATPase A1
30267812	Pavir.Cb00043.1	2732	5	-0.3008	0.811802	0.0053	0.0222	protein.degradation	AT4G18370.1	DEGP protease 5
30290001	Pavir.Ba01079.1	4196	1	-0.2999	0.812309	0.4019	0.5652	not assigned.no ontology	AT1G59600.1	ZCW7
30220107	Pavir.J14493.1	3236	2	-0.2996	0.812478	0.0104	0.038	lipid metabolism.FA synthesis and FA elongation.long chain fatty acid CoA ligase	AT4G23850.1	AMP-dependent synthetase and ligase family protein
30269498	Pavir.Cb00318.1	1327	1	-0.2994	0.81259	0.2771	0.4427	N/A	AT3G04610.1	RNA-binding KH domain-containing protein
30296394	Pavir.J23896.1	190	6	-0.29935	0.812618	<.0001	<.0001	TCA / org transformation.other organic acid transformatons.malic	AT2G13560.1	NAD-dependent malic enzyme 1
30234363	Pavir.Ab01801.1	4793	1	-0.2993	0.812647	0.2621	0.4252	misc.UDP glucosyl and glucoronyl transferases	AT5G07720.1	Galactosyl transferase GMA12/MNN10 family protein
30240962	Pavir.Ib01319.1	2975	5	-0.29925	0.812675	0.0004	0.0025	N/A	AT5G02770.1	N/A
30232181	Pavir.Ab00237.1	3356	2	-0.2992	0.812703	0.2464	0.405	N/A	AT2G21250.1	NAD(P)-linked oxidoreductase superfamily protein
30233188	Pavir.Ab00075.1	4650	1	-0.2988	0.812928	0.301	0.4677	protein.degradation.ubiquitin.E3.HECT	AT4G38600.1	HEAT repeat ;HECT-domain (ubiquitin-transferase)
30228504	Pavir.Ea01307.1	2869	6	-0.2988	0.812928	0.0067	0.0269	N/A	AT3G05625.1	Tetratricopeptide repeat (TPR)-like superfamily protein
30227426	Pavir.Ea03305.1	2619	2	-0.2986	0.813041	0.0599	0.1488	N/A	AT2G35820.1	ureidoglycolate hydrolases
30213542	Pavir.Ia03823.1	3307	2	-0.298	0.813379	0.3028	0.4693	N/A	AT4G01940.1	NFU domain protein 1
30234522	Pavir.Ab00698.1	1765	7	-0.29766	0.813571	0.0024	0.0115	hormone metabolism.jasmonate.synthesis-degradation.lipoxygenase	AT3G45140.1	lipoxygenase 2
30262480	Pavir.Db02044.1	1550	8	-0.2973	0.813774	0.0493	0.1287	not assigned.no ontology.hydroxyproline rich proteins	AT3G13990.2	Kinase-related protein of unknown function (DUF1296)
30290351	Pavir.Ba00120.1	4176	1	-0.2972	0.81383	0.3162	0.4797	protein.degradation.ubiquitin.ubiquitin protease	AT4G30890.1	ubiquitin-specific protease 24
30193358	Pavir.Da02054.1	4311	1	-0.2971	0.813887	0.2791	0.4451	protein.postranslational modification	AT3G46920.1	Protein kinase superfamily protein with octicosapeptide/Phox/Bem1p domain
30296879	Pavir.Bb02184.1	4491	1	-0.2969	0.814	0.1546	0.2925	protein.synthesis.ribosomal protein.eukaryotic.60S subunit.L34	AT5G39785.1	Protein of unknown function (DUF1666)
30297648	Pavir.Bb02826.1	2964	6	-0.29676	0.814079	0.0002	0.0014	not assigned.no ontology	AT1G11820.2	O-Glycosyl hydrolases family 17 protein
30210488	Pavir.Ia01495.1	1373	12	-0.29636	0.814304	<.0001	<.0001	PS.lightreaction.cyclic electron flow-chlororespiration	AT3G15840.1	post-illumination chlorophyll fluorescence increase
30286846	Pavir.J01083.1	247	13	-0.2958	0.81462	0.0073	0.0288	misc.peroxidases	AT4G33420.1	Peroxidase superfamily protein
30235759	Pavir.Ab01534.1	4193	2	-0.29528	0.814914	0.0017	0.0086	amino acid metabolism.synthesis.aspartate family.lysine.dihydrodipicolinate reductase	AT3G59890.1	Dihydrodipicolinate reductase, bacterial/plant
30204845	Pavir.Ca00236.1	4321	1	-0.295	0.815072	0.3207	0.4845	DNA.synthesis/chromatin structure	AT1G21690.1	ATPase family associated with various cellular activities (AAA)
30236976	Pavir.Ib00001.1	2716	5	-0.295	0.815072	0.0216	0.0686	lipid metabolism.Phospholipid synthesis	AT2G46090.1	Diacylglycerol kinase family protein
30303282	Pavir.Ga00344.1	2675	5	-0.29475	0.815214	0.0025	0.0119	not assigned.no ontology.ABC1 family protein	AT1G71810.1	Protein kinase superfamily protein
30240079	Pavir.Ib02621.1	4623	1	-0.2946	0.815298	0.2198	0.3737	misc.calcineurin-like phosphoesterase family protein	AT1G07010.1	Calcineurin-like metallo-phosphoesterase superfamily protein
30231278	Pavir.Ea00017.1	4736	3	-0.2939	0.815694	0.289	0.4552	transport.peptides and oligopeptides	AT1G65730.1	YELLOW STRIPE like 7
30241301	Pavir.Ib03624.1	18	84	-0.2938	0.815751	<.0001	<.0001	TCA / org transformation.other organic acid transformatons.malic	AT4G00570.1	NAD-dependent malic enzyme 2
30303634	Pavir.Ga01743.1	3910	1	-0.29372	0.815796	0.0257	0.0785	N/A	AT2G23390.1	N/A
30242849	Pavir.Ib03998.1	3620	2	-0.2937	0.815807	0.0631	0.1546	N/A	AT1G47720.1	Primosome PriB/single-strand DNA-binding
30310604	Pavir.Eb03656.1	3490	4	-0.29343	0.81596	0.0006	0.0035	development.unspecified	AT5G22330.1	P-loop containing nucleoside triphosphate hydrolases superfamily protein
30274207	Pavir.J00751.1	3022	2	-0.2934	0.815977	0.178	0.3245	N/A	AT4G10110.1	RNA-binding (RRM/RBD/RNP motifs) family protein
30272771	Pavir.J13460.1	1685	3	-0.29283	0.816299	0.0005	0.0031	stress.abiotic.cold	AT1G05260.1	Peroxidase superfamily protein
30224860	Pavir.Gb01035.1	1547	5	-0.2928	0.816316	0.0693	0.1654	minor CHO metabolism.others	AT5G52190.1	Sugar isomerase (SIS) family protein
30282723	Pavir.J04064.1	694	19	-0.29261	0.816424	<.0001	<.0001	PS.lightreaction.photosystem II.PSII polypeptide subunits	AT1G05385.1	photosystem II 11 kDa protein-related
30244002	Pavir.J15156.1	117	1	-0.2925	0.816486	0.1056	0.2244	PS.calvin cycle.aldolase	AT4G38970.1	fructose-bisphosphate aldolase 2
30208479	Pavir.J24789.1	4195	1	-0.2925	0.816486	0.0705	0.1674	misc.peroxidases	AT4G33420.1	Peroxidase superfamily protein
30241555	Pavir.Ib02350.1	3445	4	-0.2923	0.816599	0.027	0.0813	development.unspecified	AT1G32400.1	tobamovirus multiplication 2A
30249664	Pavir.Aa00169.1	2451	3	-0.2917	0.816939	0.0306	0.0893	misc.GDSL-motif lipase	AT5G33370.1	GDSL-like Lipase/Acylhydrolase superfamily protein
30224559	Pavir.Gb00029.1	4386	2	-0.29152	0.817041	0.0026	0.0123	protein.degradation.cysteine protease	AT5G43060.1	Granulin repeat cysteine protease family protein
30245447	Pavir.J09376.1	4042	2	-0.2912	0.817222	0.0553	0.1399	major CHO metabolism.degradation.starch.starch cleavage	AT3G23640.1	heteroglycan glucosidase 1
30228635	Pavir.Ea01568.1	4578	2	-0.2904	0.817675	0.0176	0.0585	signalling.receptor kinases.leucine rich repeat IV	AT2G45340.1	Leucine-rich repeat protein kinase family protein
30305761	Pavir.Ga01694.1	1903	10	-0.28952	0.818174	0.0003	0.002	transport.metabolite transporters at the mitochondrial membrane	AT1G14140.1	Mitochondrial substrate carrier family protein
30228432	Pavir.Ea02930.1	4210	1	-0.2894	0.818242	0.1579	0.2973	cell.organisation	AT2G19770.1	profilin 5
30237275	Pavir.Ib01137.1	4657	1	-0.2894	0.818242	0.1923	0.3417	cell.vesicle transport	AT1G31440.1	SH3 domain-containing protein
30192844	Pavir.Da00146.1	4611	2	-0.2891	0.818412	0.0308	0.0898	misc.peroxidases	AT4G30170.1	Peroxidase family protein
30245475	Pavir.J01223.1	1639	6	-0.28909	0.818418	0.0003	0.002	N/A	AT5G66010.1	RNA-binding (RRM/RBD/RNP motifs) family protein
30303914	Pavir.Ga00459.1	797	11	-0.28844	0.818787	<.0001	<.0001	N/A	AT2G32240.1	N/A
30239086	Pavir.Ib01242.1	4568	1	-0.2884	0.81881	0.1445	0.2791	RNA.processing	AT3G17040.1	high chlorophyll fluorescent 107
30229196	Pavir.Ea02319.1	1558	15	-0.28806	0.819003	<.0001	<.0001	not assigned.no ontology	AT5G62840.1	Phosphoglycerate mutase family protein
30214843	Pavir.Ia00485.1	4252	1	-0.288	0.819037	0.0499	0.1299	PS.calvin cycle.Rib5P Isomerase	AT5G44520.1	NagB/RpiA/CoA transferase-like superfamily protein
30270054	Pavir.Cb01901.1	2571	4	-0.288	0.819037	0.0888	0.1988	N/A	AT1G33800.1	Protein of unknown function (DUF579)
30278851	Pavir.Fb01341.1	3460	1	-0.2875	0.819321	0.1635	0.3044	protein.synthesis.elongation	AT4G11120.1	translation elongation factor Ts (EF-Ts), putative
30218083	Pavir.J09198.1	2232	9	-0.28743	0.81936	0.0027	0.0127	major CHO metabolism.synthesis.starch.AGPase	AT1G27680.1	ADPGLC-PPase large subunit
30263007	Pavir.Db00788.1	2801	4	-0.28715	0.819519	0.0012	0.0064	N/A	AT1G62780.1	N/A
30233576	Pavir.Ab00511.1	2823	3	-0.2867	0.819775	0.0168	0.0565	N/A	AT2G19270.1	N/A
30317065	Pavir.Ha00426.1	2826	3	-0.2866	0.819832	0.0215	0.0685	not assigned.no ontology	AT3G18140.1	Transducin/WD40 repeat-like superfamily protein
30262584	Pavir.Db00983.1	2264	3	-0.28609	0.820122	0.0022	0.0107	RNA.regulation of transcription.putative transcription regulator	AT2G33620.1	AT hook motif DNA-binding family protein
30245549	Pavir.J00472.1	505	8	-0.2859	0.82023	0.0685	0.164	glycolysis.cytosolic branch.phosphofructokinase (PFK)	AT4G26270.1	phosphofructokinase 3
30204812	Pavir.Ca00041.1	3758	1	-0.2858	0.820287	0.1121	0.2332	N/A	AT5G04740.1	ACT domain-containing protein
30244007	Pavir.J14758.1	1253	16	-0.28577	0.820304	<.0001	<.0001	amino acid metabolism.synthesis.serine-glycine-cysteine group.serine.phosphoglycerate dehydrogenase	AT4G34200.1	D-3-phosphoglycerate dehydrogenase
30227908	Pavir.Ea01132.1	3128	2	-0.2847	0.820912	0.0708	0.1678	DNA.synthesis/chromatin structure	AT5G04130.1	DNA GYRASE B2
30269373	Pavir.Cb01993.1	12	12	-0.28416	0.82122	<.0001	<.0001	PS.calvin cycle.aldolase	AT4G38970.1	fructose-bisphosphate aldolase 2
30212273	Pavir.Ia00185.1	3799	4	-0.28387	0.821385	0.0037	0.0165	secondary metabolism.flavonoids.chalcones.chalcone isomerase	AT3G55120.1	Chalcone-flavanone isomerase family protein
30290259	Pavir.Ba01135.1	1539	7	-0.28322	0.821755	0.0052	0.0219	misc.UDP glucosyl and glucoronyl transferases	AT3G16520.3	UDP-glucosyl transferase 88A1
30186089	Pavir.Fa00635.1	4470	2	-0.28315	0.821795	0.0007	0.0041	N/A	AT3G11560.2	LETM1-like protein
30299059	Pavir.Bb00425.1	3052	6	-0.28311	0.821818	0.0013	0.0069	RNA.regulation of transcription.Chromatin Remodeling Factors	AT4G22140.1	PHD finger family protein / bromo-adjacent homology (BAH) domain-containing protein
30240376	Pavir.Ib01106.1	4117	1	-0.2826	0.822108	0.4372	0.6003	protein.synthesis.initiation	AT5G18110.1	novel cap-binding protein
30212803	Pavir.Ia01758.1	1865	5	-0.28256	0.822131	0.0023	0.0111	N/A	AT5G15270.1	RNA-binding KH domain-containing protein
30310636	Pavir.Eb00490.1	4023	2	-0.28253	0.822148	0.004	0.0177	RNA.regulation of transcription.MYB-related transcription factor family	AT1G49950.1	telomere repeat binding factor 1
30223182	Pavir.Gb02335.1	1957	8	-0.28188	0.822518	0.0001	0.0007	PS.calvin cycle.transketolase	AT2G45290.1	Transketolase
30306064	Pavir.Ga00880.1	661	14	-0.28136	0.822815	<.0001	<.0001	RNA.regulation of transcription.putative transcription regulator	AT3G61260.1	Remorin family protein
30190514	Pavir.J05875.1	111	11	-0.28132	0.822838	<.0001	<.0001	C1-metabolism.glycine hydroxymethyltransferase	AT4G37930.1	serine transhydroxymethyltransferase 1
30269685	Pavir.Cb00837.1	892	17	-0.28104	0.822998	<.0001	<.0001	stress.abiotic.heat	AT5G21430.1	Chaperone DnaJ-domain superfamily protein
30300751	Pavir.Bb01724.1	3516	1	-0.2809	0.823077	0.316	0.4795	transport.ABC transporters and multidrug resistance systems	AT1G65410.1	non-intrinsic ABC protein 11
30246221	Pavir.J00758.1	4713	1	-0.2809	0.823077	0.1013	0.2184	not assigned.no ontology	AT4G22990.1	Major Facilitator Superfamily with SPX (SYG1/Pho81/XPR1) domain-containing protein
30237370	Pavir.Ib01085.1	2168	2	-0.2809	0.823077	0.2427	0.4004	not assigned.no ontology	AT5G61220.1	LYR family of Fe/S cluster biogenesis protein
30214623	Pavir.Ia00442.1	1151	6	-0.28071	0.823186	0.0001	0.0007	cell.organisation	AT4G14960.2	Tubulin/FtsZ family protein
30254398	Pavir.J00136.1	1449	10	-0.28057	0.823266	0.003	0.0139	stress.abiotic.heat	AT5G04890.1	HSP20-like chaperones superfamily protein
30316733	Pavir.Ha00163.1	1125	6	-0.28019	0.823483	0.0012	0.0064	misc.nitrilases. *nitrile lyases. berberine bridge enzymes. reticuline oxidases. troponine reductases	AT2G29360.1	NAD(P)-binding Rossmann-fold superfamily protein
30242892	Pavir.Ib01770.1	3690	2	-0.28	0.823591	0.0451	0.12	N/A	AT3G21550.1	DUF679 domain membrane protein 2
30302546	Pavir.Ga00895.1	270	18	-0.27996	0.823614	<.0001	<.0001	protein.synthesis.elongation	AT1G62750.1	Translation elongation factor EFG/EF2 protein
30225164	Pavir.J07322.1	2734	5	-0.2797	0.823762	0.0182	0.0601	redox.ascorbate and glutathione	AT4G18260.1	Cytochrome b561/ferric reductase transmembrane protein family
30211751	Pavir.Ia00081.1	4669	1	-0.2796	0.823819	0.1931	0.3421	protein.postranslational modification	AT1G09020.1	homolog of yeast sucrose nonfermenting 4
30302874	Pavir.Ga00061.1	1704	14	-0.27921	0.824042	<.0001	<.0001	N/A	AT4G31430.2	N/A
30272249	Pavir.J26860.1	1776	4	-0.2777	0.824905	0.0202	0.0654	not assigned.no ontology	AT5G45170.1	Haloacid dehalogenase-like hydrolase (HAD) superfamily protein
30242021	Pavir.Ib02057.1	4821	1	-0.2775	0.825019	0.0664	0.1603	N/A	AT3G29575.1	ABI five binding protein 3
30189299	Pavir.J02589.1	4433	1	-0.2775	0.825019	0.168	0.3109	signalling.calcium	AT3G14590.2	Calcium-dependent lipid-binding (CaLB domain) family protein
30281105	Pavir.Fb01289.1	4928	2	-0.2772	0.825191	0.0724	0.1704	N/A	N/A	N/A
30229737	Pavir.Ea03747.1	1158	1	-0.2769	0.825363	0.1135	0.2353	N/A	AT2G36145.1	N/A
30221130	Pavir.J06703.1	2632	4	-0.2767	0.825477	0.0212	0.0679	nucleotide metabolism.phosphotransfer and pyrophosphatases.misc	AT4G29680.1	Alkaline-phosphatase-like family protein
30261273	Pavir.Db00220.1	812	3	-0.2762	0.825763	0.0703	0.1672	N/A	AT1G16720.1	high chlorophyll fluorescence phenotype 173
30299203	Pavir.Bb02763.1	3970	1	-0.2759	0.825935	0.4101	0.5731	protein.degradation	AT1G75460.1	ATP-dependent protease La (LON) domain protein
30311392	Pavir.Eb01696.1	1419	6	-0.2758	0.825992	0.0096	0.0358	RNA.processing	AT1G14650.1	SWAP (Suppressor-of-White-APricot)/surp domain-containing protein / ubiquitin family protein
30291410	Pavir.Ba01078.1	3878	3	-0.27513	0.826376	0.0077	0.0302	protein.aa activation.threonine-tRNA ligase	AT2G04842.1	threonyl-tRNA synthetase, putative / threonine--tRNA ligase, putative
30201300	Pavir.J30616.1	3003	3	-0.275	0.82645	0.0233	0.0727	secondary metabolism.isoprenoids.non-mevalonate pathway.geranylgeranyl pyrophosphate synthase	AT4G36810.1	geranylgeranyl pyrophosphate synthase 1
30191401	Pavir.Da01251.1	4365	1	-0.2749	0.826508	0.1628	0.3036	not assigned.no ontology.glycine rich proteins	AT2G15780.1	Cupredoxin superfamily protein
30243716	Pavir.J18174.1	4282	1	-0.2749	0.826508	0.2268	0.3825	not assigned.no ontology	AT3G19080.1	SWIB complex BAF60b domain-containing protein
30198368	Pavir.J40434.1	3898	1	-0.2747	0.826622	0.052	0.1336	DNA.repair	AT1G01490.1	Heavy metal transport/detoxification superfamily protein
30300862	Pavir.Bb01424.1	2775	3	-0.27462	0.826668	0.0015	0.0077	stress.abiotic.cold	AT5G23950.1	Calcium-dependent lipid-binding (CaLB domain) family protein
30262370	Pavir.Db00283.1	2642	4	-0.2746	0.826679	0.0046	0.0197	N/A	AT4G25910.1	NFU domain protein 3
30313824	Pavir.Eb02349.1	516	7	-0.27415	0.826937	0.001	0.0055	cell wall.precursor synthesis.UXS	AT3G62830.1	NAD(P)-binding Rossmann-fold superfamily protein
30213746	Pavir.Ia04263.1	3271	3	-0.2739	0.827081	0.0808	0.1857	transport.ABC transporters and multidrug resistance systems	AT5G06530.1	ABC-2 type transporter family protein
30284617	Pavir.J02066.1	2150	12	-0.27375	0.827167	<.0001	<.0001	DNA.synthesis/chromatin structure	AT5G11170.1	DEAD/DEAH box RNA helicase family protein
30226772	Pavir.Ea02825.1	2816	3	-0.2736	0.827253	0.0002	0.0014	not assigned.no ontology	AT5G65770.1	little nuclei4
30233219	Pavir.Ab00624.1	1998	8	-0.27352	0.827299	0.0006	0.0035	hormone metabolism.cytokinin.synthesis-degradation	AT2G36750.1	UDP-glucosyl transferase 73C1
30292984	Pavir.Ba00958.1	749	20	-0.27342	0.827356	<.0001	<.0001	PS.lightreaction.other electron carrier (ox/red).ferredoxin	AT3G16250.1	NDH-dependent cyclic electron flow 1
30240307	Pavir.Ib00355.1	3904	1	-0.2733	0.827425	0.1076	0.2273	not assigned.no ontology	AT5G66100.1	winged-helix DNA-binding transcription factor family protein
30228548	Pavir.Ea02302.1	1767	10	-0.27312	0.827528	<.0001	<.0001	RNA.processing.RNA helicase	AT5G08610.1	P-loop containing nucleoside triphosphate hydrolases superfamily protein
30253186	Pavir.Aa00927.1	3740	1	-0.2731	0.827539	0.0959	0.2101	development.unspecified	AT5G24520.1	Transducin/WD40 repeat-like superfamily protein
30317193	Pavir.Ha00327.1	383	41	-0.27293	0.827637	<.0001	<.0001	mitochondrial electron transport / ATP synthesis.uncoupling protein	AT3G54110.1	plant uncoupling mitochondrial protein 1
30291227	Pavir.Ba01111.1	4425	1	-0.2728	0.827712	0.1309	0.2611	N/A	AT2G43410.2	RNA binding
30225201	Pavir.J28422.1	2047	5	-0.2728	0.827712	0.0244	0.0753	OPP.oxidative PP.6-phosphogluconate dehydrogenase	AT4G29120.1	6-phosphogluconate dehydrogenase family protein
30242558	Pavir.Ib01082.1	1870	3	-0.2726	0.827826	0.0234	0.0729	amino acid metabolism.synthesis.histidine.N'-5'-phosphoribosyl-formimino-5-aminoimidazole-4-carboxamide ribonucleotide isomerase	AT4G26900.1	HIS HF
30185077	Pavir.J02049.1	3386	2	-0.2723	0.827998	0.07	0.1667	N/A	AT3G13740.1	Ribonuclease III family protein
30235788	Pavir.Ab00096.1	3563	1	-0.2722	0.828056	0.3153	0.479	RNA.regulation of transcription.Chromatin Remodeling Factors	AT2G46020.2	transcription regulatory protein SNF2, putative
30291716	Pavir.Ba00052.1	3575	4	-0.2722	0.828056	0.0093	0.0348	DNA.repair	AT5G28740.1	Tetratricopeptide repeat (TPR)-like superfamily protein
30262148	Pavir.Db00040.1	3982	1	-0.2717	0.828343	0.3276	0.4902	RNA.regulation of transcription.Nucleosome/chromatin assembly factor group	AT1G20696.2	high mobility group B3
30186084	Pavir.Fa00243.1	3232	3	-0.2717	0.828343	0.028	0.0834	protein.synthesis.ribosomal protein.eukaryotic.60S subunit.L38	AT3G59540.1	Ribosomal L38e protein family
30282017	Pavir.J11959.1	4351	2	-0.2715	0.828458	0.0294	0.0866	N/A	AT1G06130.1	glyoxalase 2-4
30266669	Pavir.Hb01955.1	2105	3	-0.27117	0.828647	0.0041	0.018	N/A	AT1G50450.1	Saccharopine dehydrogenase
30246339	Pavir.J00009.1	3706	2	-0.2709	0.828802	0.2091	0.361	cell.division	AT2G27170.1	Structural maintenance of chromosomes (SMC) family protein
30204204	Pavir.Ca00413.1	3455	2	-0.27078	0.828871	0.0161	0.0546	RNA.regulation of transcription.SET-domain transcriptional regulator family	AT5G14260.1	Rubisco methyltransferase family protein
30192925	Pavir.Da00172.1	3848	3	-0.2707	0.828917	0.0581	0.1453	N/A	ATMG00560.1	Nucleic acid-binding, OB-fold-like protein
30234336	Pavir.Ab02988.1	2972	2	-0.27047	0.829049	0.017	0.057	N/A	AT1G18730.1	NDH dependent flow 6
30258573	Pavir.J38070.1	3892	1	-0.2704	0.82909	0.2821	0.448	RNA.processing	AT1G03330.1	Small nuclear ribonucleoprotein family protein
30187552	Pavir.Fa00666.1	3606	2	-0.2702	0.829205	0.05	0.1301	N/A	AT3G48690.1	alpha/beta-Hydrolases superfamily protein
30282265	Pavir.J07003.1	4829	1	-0.27018	0.829216	0.0042	0.0183	N/A	N/A	N/A
30291416	Pavir.Ba01376.1	2351	6	-0.27	0.82932	0.0673	0.1618	protein.aa activation.valine-tRNA ligase	AT1G14610.1	valyl-tRNA synthetase / valine--tRNA ligase (VALRS)
30216066	Pavir.J15193.1	3461	2	-0.26954	0.829584	0.0051	0.0216	transport.porins	AT3G01280.1	voltage dependent anion channel 1
30249808	Pavir.Aa01018.1	41	17	-0.26923	0.829762	<.0001	<.0001	PS.calvin cycle.PRK	AT1G32060.1	phosphoribulokinase
30297818	Pavir.Bb02402.1	1094	13	-0.26899	0.8299	<.0001	<.0001	misc.peroxidases	AT2G22420.1	Peroxidase superfamily protein
30249996	Pavir.Aa00678.1	2097	4	-0.2689	0.829952	0.0093	0.0348	development.unspecified	AT3G13300.2	Transducin/WD40 repeat-like superfamily protein
30301725	Pavir.J20457.1	1112	14	-0.26887	0.829969	<.0001	<.0001	fermentation.LDH	AT4G17260.1	Lactate/malate dehydrogenase family protein
30297596	Pavir.Bb00687.1	1936	11	-0.26864	0.830102	<.0001	<.0001	protein.degradation	AT3G05350.1	Metallopeptidase M24 family protein
30258341	Pavir.J01853.1	4173	1	-0.2686	0.830125	0.2104	0.3626	N/A	AT2G35155.1	Trypsin family protein
30242148	Pavir.Ib01900.1	1983	1	-0.2684	0.83024	0.3818	0.5471	N/A	AT1G19140.2	N/A
30304198	Pavir.Ga01327.1	2679	4	-0.26764	0.830677	0.0039	0.0173	cell wall.cell wall proteins.LRR	AT4G06744.1	Leucine-rich repeat (LRR) family protein
30197560	Pavir.J07933.1	158	11	-0.26727	0.83089	<.0001	<.0001	misc.glutathione S transferases	AT3G03190.1	glutathione S-transferase F11
30299009	Pavir.Bb03178.1	1735	14	-0.26711	0.830982	<.0001	<.0001	N/A	AT3G03890.1	FMN binding
30205896	Pavir.Ca01758.1	4165	2	-0.267	0.831046	0.0219	0.0694	transport.metabolite transporters at the mitochondrial membrane	AT5G56450.1	Mitochondrial substrate carrier family protein
30298083	Pavir.Bb03674.1	4460	1	-0.2668	0.831161	0.2213	0.3756	misc.O-methyl transferases	AT3G06930.2	protein arginine methyltransferase 4B
30193345	Pavir.Da02287.1	96	10	-0.26675	0.83119	<.0001	<.0001	PS.calvin cycle.transketolase	AT2G45290.1	Transketolase
30194517	Pavir.Da00552.1	4794	1	-0.2667	0.831219	0.3193	0.4831	N/A	AT5G11270.1	overexpressor of cationic peroxidase 3
30206984	Pavir.Ca00776.1	340	4	-0.26655	0.831305	0.0096	0.0358	misc.peroxidases	AT4G33420.1	Peroxidase superfamily protein
30250112	Pavir.Aa00913.1	4269	1	-0.26624	0.831484	0.0245	0.0754	N/A	AT5G62140.1	N/A
30243190	Pavir.J37673.1	4259	1	-0.2662	0.831507	0.3689	0.5353	misc.UDP glucosyl and glucoronyl transferases	AT3G16520.3	UDP-glucosyl transferase 88A1
30309033	Pavir.Eb02693.1	3521	1	-0.2657	0.831795	0.3814	0.547	N/A	AT2G42975.1	N/A
30272697	Pavir.J00953.1	4402	1	-0.2656	0.831853	0.2614	0.4243	misc.GCN5-related N-acetyltransferase	AT1G32070.3	nuclear shuttle interacting
30292007	Pavir.Ba00344.1	3675	1	-0.2655	0.83191	0.1912	0.3403	RNA.regulation of transcription.unclassified	AT3G53460.1	chloroplast RNA-binding protein 29
30247418	Pavir.J34160.1	1475	10	-0.26543	0.831951	<.0001	<.0001	protein.degradation.metalloprotease	AT5G53170.1	FTSH protease 11
30186732	Pavir.Fa00066.1	1036	20	-0.26533	0.832008	<.0001	<.0001	PS.lightreaction.cyclic electron flow-chlororespiration	AT2G05620.1	proton gradient regulation 5
30284124	Pavir.J01866.1	2279	4	-0.26532	0.832014	0.0017	0.0086	major CHO metabolism.degradation.sucrose.Susy	AT1G73370.1	sucrose synthase 6
30242953	Pavir.Ib00308.1	3686	1	-0.2653	0.832026	0.1782	0.3247	protein.aa activation.pseudouridylate synthase	AT2G39140.1	pseudouridine synthase family protein
30188407	Pavir.Fa01256.1	1220	12	-0.26494	0.832233	0.0003	0.002	RNA.regulation of transcription.unclassified	AT5G10770.1	Eukaryotic aspartyl protease family protein
30203092	Pavir.Ca00645.1	2164	2	-0.2649	0.832256	0.0266	0.0804	nucleotide metabolism.phosphotransfer and pyrophosphatases.misc	AT3G53620.1	pyrophosphorylase 4
30211178	Pavir.Ia01166.1	4640	1	-0.2647	0.832372	0.1045	0.2225	RNA.regulation of transcription.MYB-related transcription factor family	AT1G49950.1	telomere repeat binding factor 1
30246108	Pavir.J30640.1	3331	2	-0.26425	0.832631	0.0027	0.0127	N/A	AT5G23530.1	carboxyesterase 18
30230706	Pavir.Ea03724.1	332	11	-0.26422	0.832649	<.0001	<.0001	major CHO metabolism.synthesis.sucrose.FBPase	AT1G43670.1	Inositol monophosphatase family protein
30242696	Pavir.Ib00870.1	2914	3	-0.2641	0.832718	0.0213	0.068	protein.synthesis.ribosomal protein.prokaryotic.mitochondrion.L51/S25/CI-B8	AT3G59650.1	mitochondrial ribosomal protein L51/S25/CI-B8 family protein
30215237	Pavir.Ia01507.1	3845	2	-0.2639	0.832833	0.0276	0.0826	misc.cytochrome P450	AT1G64950.1	cytochrome P450, family 89, subfamily A, polypeptide 5
30250882	Pavir.Aa03517.1	1578	3	-0.2637	0.832949	0.0862	0.1944	protein.synthesis.ribosomal protein.eukaryotic.60S subunit.L7	AT3G13580.1	Ribosomal protein L30/L7 family protein
30312828	Pavir.Eb00631.1	4677	2	-0.2637	0.832949	0.104	0.2219	development.unspecified	AT3G18060.1	transducin family protein / WD-40 repeat family protein
30241276	Pavir.Ib01725.1	3050	2	-0.2635	0.833064	0.1645	0.3059	protein.postranslational modification	AT4G21860.1	methionine sulfoxide reductase B 2
30236921	Pavir.Ib01285.1	4850	1	-0.2634	0.833122	0.3037	0.4695	RNA.regulation of transcription.unclassified	AT3G53710.1	ARF-GAP domain 6
30309527	Pavir.Eb00615.1	4820	1	-0.2632	0.833238	0.4347	0.5978	N/A	AT1G71110.1	N/A
30259153	Pavir.J37766.1	2884	2	-0.2628	0.833469	0.0735	0.1724	protein.degradation.serine protease	AT2G47940.1	DEGP protease 2
30193377	Pavir.Da01201.1	1879	7	-0.26275	0.833498	0.0035	0.0158	protein.aa activation.alanine-tRNA ligase	AT5G22800.1	Alanyl-tRNA synthetase, class IIc
30203723	Pavir.Ca00340.1	3233	3	-0.2624	0.8337	0.0217	0.0689	RNA.regulation of transcription.zf-HD	AT2G02540.1	homeobox protein 21
30267394	Pavir.J05562.1	2420	4	-0.262	0.833931	0.0497	0.1295	DNA.synthesis/chromatin structure.histone.H1	AT2G18050.1	histone H1-3
30207146	Pavir.Ca02830.1	1680	2	-0.2616	0.834162	0.2272	0.3828	RNA.processing.RNA helicase	AT3G22330.1	putative mitochondrial RNA helicase 2
30212695	Pavir.Ia03709.1	2874	3	-0.2612	0.834394	0.0163	0.055	RNA.processing	AT2G41500.1	WD-40 repeat family protein / small nuclear ribonucleoprotein Prp4p-related
30269396	Pavir.Cb00561.1	3530	3	-0.2609	0.834567	0.0281	0.0836	mitochondrial electron transport / ATP synthesis.cytochrome c oxidase	AT2G47380.1	Cytochrome c oxidase subunit Vc family protein
30238583	Pavir.Ib01148.1	4262	1	-0.2608	0.834625	0.1448	0.2794	cell.organisation	AT5G59210.1	myosin heavy chain-related
30285069	Pavir.J28751.1	2213	5	-0.2605	0.834799	0.0273	0.082	N/A	AT3G18790.1	N/A
30304614	Pavir.Ga00191.1	1455	14	-0.26041	0.834851	<.0001	<.0001	N/A	AT5G38660.1	acclimation of photosynthesis to environment
30236682	Pavir.J02009.1	4437	1	-0.2602	0.834972	0.0552	0.1398	RNA.regulation of transcription.CCAAT box binding factor family. HAP3	AT3G53340.1	nuclear factor Y, subunit B10
30215411	Pavir.Ia02388.1	4180	2	-0.2601	0.83503	0.0975	0.2123	secondary metabolism.isoprenoids.carotenoids.carotenoid epsilon ring hydroxylase	AT3G53130.1	Cytochrome P450 superfamily protein
30191965	Pavir.Da00262.1	3975	2	-0.2601	0.83503	0.0642	0.1564	PS.calvin cycle.FBPase	AT5G64380.1	Inositol monophosphatase family protein
30186257	Pavir.Fa01009.1	2795	6	-0.25987	0.835163	0.0004	0.0025	development.unspecified	AT3G46630.1	Protein of unknown function (DUF3223)
30262064	Pavir.Db02317.1	66	34	-0.25948	0.835389	<.0001	<.0001	PS.calvin cycle.transketolase	AT2G45290.1	Transketolase
30260770	Pavir.Db00955.1	1506	11	-0.25903	0.83565	0.0024	0.0115	N/A	AT5G42850.1	Thioredoxin superfamily protein
30315740	Pavir.J02399.1	3051	1	-0.2589	0.835725	0.5482	0.6897	N/A	AT4G32900.2	Peptidyl-tRNA hydrolase II (PTH2) family protein
30237415	Pavir.Ib02524.1	3968	1	-0.2581	0.836188	0.2055	0.3567	DNA.repair	AT1G01490.1	Heavy metal transport/detoxification superfamily protein
30202564	Pavir.J16503.1	2315	2	-0.25785	0.836333	0.0018	0.009	protein.targeting.mitochondria	AT3G46560.1	Tim10/DDP family zinc finger protein
30213320	Pavir.Ia00715.1	4080	1	-0.2578	0.836362	0.1504	0.2861	N/A	AT5G65840.1	Thioredoxin superfamily protein
30288611	Pavir.Ba00973.1	3018	5	-0.25775	0.836391	0.0015	0.0077	protein.aa activation.asparagine-tRNA ligase	AT4G17300.1	Class II aminoacyl-tRNA and biotin synthetases superfamily protein
30218481	Pavir.J16795.1	3112	3	-0.25761	0.836472	0.0114	0.0411	protein.synthesis.initiation	AT2G05830.1	NagB/RpiA/CoA transferase-like superfamily protein
30230626	Pavir.Ea01831.1	1058	8	-0.25704	0.836803	0.001	0.0055	nucleotide metabolism.synthesis.purine.GAR Synthetase	AT1G09830.1	Glycinamide ribonucleotide (GAR) synthetase
30312050	Pavir.Eb03611.1	3598	5	-0.25698	0.836838	0.0001	0.0007	mitochondrial electron transport / ATP synthesis.NADH-DH.type II.internal matrix	AT2G29990.1	alternative NAD(P)H dehydrogenase 2
30190392	Pavir.J32032.1	3158	4	-0.25642	0.837163	0.0047	0.0201	secondary metabolism.phenylpropanoids	AT2G19070.1	spermidine hydroxycinnamoyl transferase
30198707	Pavir.J10101.1	398	30	-0.25637	0.837192	<.0001	<.0001	misc.oxidases - copper. flavone etc	AT2G35660.1	FAD/NAD(P)-binding oxidoreductase family protein
30199692	Pavir.J19016.1	2036	6	-0.25623	0.837273	0.0033	0.0151	protein.degradation.serine protease	AT3G03380.1	DegP protease 7
30251287	Pavir.Aa01674.1	3197	3	-0.25615	0.837319	0.0021	0.0103	transport.unspecified anions	AT5G49890.1	chloride channel C
30302272	Pavir.Ga01982.1	1544	8	-0.2559	0.837465	0.022	0.0697	protein.synthesis.ribosomal protein.eukaryotic.60S subunit.L37A	AT3G10950.1	Zinc-binding ribosomal protein family protein
30301785	Pavir.J20930.1	4231	2	-0.2559	0.837465	0.1438	0.2788	N/A	AT5G19855.1	Chaperonin-like RbcX protein
30205204	Pavir.Ca00836.1	1124	1	-0.2558	0.837523	0.441	0.6036	cell.cycle.peptidylprolyl isomerase	AT5G13120.1	cyclophilin 20-2
30245007	Pavir.J21250.1	878	2	-0.2554	0.837755	0.1045	0.2225	protein.degradation.serine protease	AT1G15000.1	serine carboxypeptidase-like 50
30240889	Pavir.Ib02457.1	4797	1	-0.2551	0.837929	0.2415	0.3991	cell wall.modification	AT1G12560.1	expansin A7
30241612	Pavir.Ib01300.1	4312	1	-0.255	0.837987	0.0832	0.1896	protein.degradation.ubiquitin.E3.RING	AT1G61620.1	phosphoinositide binding
30275783	Pavir.J12739.1	1689	2	-0.2549	0.838045	0.0373	0.1034	protein.degradation.metalloprotease	AT3G47060.1	FTSH protease 7
30304860	Pavir.Ga00271.1	3901	1	-0.2546	0.83822	0.1854	0.3325	N/A	AT5G63910.1	farnesylcysteine lyase
30230642	Pavir.Ea02715.1	2342	8	-0.25453	0.83826	0.0034	0.0154	N/A	AT3G24430.1	ATP binding
30292374	Pavir.Ba01872.1	3231	4	-0.2545	0.838278	0.0376	0.104	PS.lightreaction.photosystem I.LHC-I	AT1G19150.1	photosystem I light harvesting complex gene 6
30236773	Pavir.Ib00714.1	3088	2	-0.25424	0.838429	0.0078	0.0304	protein.aa activation.methionine-tRNA ligase	AT3G55400.1	methionyl-tRNA synthetase / methionine--tRNA ligase / MetRS (cpMetRS)
30239972	Pavir.Ib00534.1	3731	2	-0.2537	0.838743	0.0348	0.0983	secondary metabolism.isoprenoids.carotenoids.phytoene dehydrogenase	AT4G14210.1	phytoene desaturase 3
30241651	Pavir.Ib03228.1	1574	12	-0.25352	0.838847	<.0001	<.0001	RNA.regulation of transcription.unclassified	AT5G10770.1	Eukaryotic aspartyl protease family protein
30187351	Pavir.Fa00889.1	285	1	-0.253	0.83915	0.2599	0.4227	TCA / org transformation.other organic acid transformatons.cyt MDH	AT3G47520.1	malate dehydrogenase
30239398	Pavir.Ib01281.1	4175	1	-0.2529	0.839208	0.6675	0.7867	N/A	AT5G48540.1	receptor-like protein kinase-related family protein
30259229	Pavir.J38885.1	4002	1	-0.2526	0.839382	0.1986	0.3478	N/A	AT5G23530.1	carboxyesterase 18
30226535	Pavir.Ea01995.1	3926	2	-0.2525	0.839441	0.1037	0.2216	RNA.regulation of transcription.CCAAT box binding factor family. HAP5	AT3G12480.1	nuclear factor Y, subunit C11
30281273	Pavir.Fb01455.1	1074	11	-0.25241	0.839493	<.0001	<.0001	N/A	AT5G38660.1	acclimation of photosynthesis to environment
30277841	Pavir.J06280.1	2694	9	-0.25191	0.839784	<.0001	<.0001	protein.postranslational modification	AT1G31160.1	HISTIDINE TRIAD NUCLEOTIDE-BINDING 2
30273317	Pavir.J03513.1	4383	2	-0.2519	0.83979	0.0466	0.1226	not assigned.no ontology	AT5G62740.1	SPFH/Band 7/PHB domain-containing membrane-associated protein family
30207061	Pavir.Ca01384.1	4565	1	-0.2518	0.839848	0.1821	0.3286	protein.synthesis.ribosomal protein.prokaryotic.chloroplast.50S subunit.L22	AT1G52370.1	Ribosomal protein L22p/L17e family protein
30232584	Pavir.Ab02760.1	3275	2	-0.2513	0.840139	0.1113	0.2322	not assigned.no ontology	AT4G36530.2	alpha/beta-Hydrolases superfamily protein
30301104	Pavir.Bb00344.1	2535	3	-0.2513	0.840139	0.0142	0.0493	cell.vesicle transport	AT5G08080.1	syntaxin of plants 132
30302946	Pavir.Ga02351.1	2087	1	-0.2512	0.840197	0.1084	0.2283	RNA.regulation of transcription.MYB-related transcription factor family	AT1G09770.1	cell division cycle 5
30207041	Pavir.Ca02105.1	153	4	-0.2511	0.840256	0.0181	0.0598	PS.calvin cycle.rubisco small subunit	AT1G67090.1	ribulose bisphosphate carboxylase small chain 1A
30192515	Pavir.Da01203.1	1958	8	-0.25095	0.840343	0.0009	0.005	development.unspecified	AT3G48140.1	B12D protein
30265865	Pavir.Hb00154.1	3559	3	-0.2508	0.84043	0.1909	0.3399	cell.vesicle transport	AT4G12770.2	Chaperone DnaJ-domain superfamily protein
30292014	Pavir.Ba01419.1	3929	2	-0.2507	0.840489	0.0341	0.0966	protein.postranslational modification	AT4G31860.1	Protein phosphatase 2C family protein
30189797	Pavir.J20466.1	2162	2	-0.2506	0.840547	0.0838	0.1905	signalling.14-3-3 proteins	AT3G02520.1	general regulatory factor 7
30240330	Pavir.Ib04138.1	4806	1	-0.2503	0.840722	0.4328	0.5962	protein.synthesis.elongation	AT3G22980.1	Ribosomal protein S5/Elongation factor G/III/V family protein
30290038	Pavir.Ba00009.1	3517	2	-0.2503	0.840722	0.0284	0.0841	cell.vesicle transport	AT3G17440.2	novel plant snare 13
30298251	Pavir.Bb02373.1	535	8	-0.2502	0.84078	0.0207	0.0667	glycolysis.plastid branch.glucose-6-phosphate isomerase	AT4G24620.1	phosphoglucose isomerase 1
30253031	Pavir.Aa00685.1	4787	1	-0.2499	0.840955	0.1965	0.346	RNA.regulation of transcription.SET-domain transcriptional regulator family	AT3G07670.1	Rubisco methyltransferase family protein
30300744	Pavir.Bb02822.1	1683	8	-0.2493	0.841305	0.027	0.0813	S-assimilation.APR	AT4G21990.1	APS reductase 3
30209499	Pavir.Ia00634.1	130	3	-0.2493	0.841305	0.1462	0.2811	C1-metabolism.glycine hydroxymethyltransferase	AT4G37930.1	serine transhydroxymethyltransferase 1
30211413	Pavir.Ia02206.1	4206	1	-0.2491	0.841421	0.1663	0.3084	RNA.regulation of transcription.C2C2(Zn) CO-like. Constans-like zinc finger family	AT5G57660.1	CONSTANS-like 5
30288469	Pavir.Ba01708.1	4465	1	-0.249	0.841479	0.193	0.3421	not assigned.no ontology	AT5G13020.1	Emsy N Terminus (ENT)/ plant Tudor-like domains-containing protein
30291683	Pavir.Ba02066.1	4665	1	-0.2486	0.841713	0.4967	0.6479	RNA.processing	AT5G15390.1	tRNA/rRNA methyltransferase (SpoU) family protein
30311703	Pavir.Eb00368.1	1047	18	-0.2485	0.841771	<.0001	<.0001	fermentation.PDC	AT5G17380.1	Thiamine pyrophosphate dependent pyruvate decarboxylase family protein
30215071	Pavir.Ia00645.1	4174	1	-0.2484	0.84183	0.3563	0.5209	N/A	AT2G39810.1	ubiquitin-protein ligases
30228960	Pavir.Ea01093.1	4405	1	-0.2483	0.841888	0.2159	0.3694	RNA.regulation of transcription.Argonaute	AT2G27040.1	Argonaute family protein
30209461	Pavir.Ia00664.1	214	16	-0.24828	0.8419	<.0001	<.0001	major CHO metabolism.synthesis.starch.AGPase	AT5G19220.1	ADP glucose pyrophosphorylase large subunit 1
30242321	Pavir.Ib01348.1	1825	7	-0.24813	0.841987	0.0011	0.006	misc.rhodanese	AT3G08920.1	Rhodanese/Cell cycle control phosphatase superfamily protein
30301019	Pavir.Bb03355.1	3250	2	-0.2477	0.842238	0.0344	0.0972	stress.abiotic.heat	AT5G64360.2	Chaperone DnaJ-domain superfamily protein
30187794	Pavir.Fa01065.1	4863	1	-0.2474	0.842413	0.0457	0.1214	misc.short chain dehydrogenase/reductase (SDR)	AT4G03140.1	NAD(P)-binding Rossmann-fold superfamily protein
30291223	Pavir.Ba02029.1	2457	4	-0.2472	0.84253	0.0902	0.2006	hormone metabolism.abscisic acid.signal transduction	AT3G19290.1	ABRE binding factor 4
30231451	Pavir.Ea02500.1	1371	9	-0.24706	0.842612	0.0087	0.033	N/A	AT1G66840.1	Plant protein of unknown function (DUF827)
[truncated: 4,059 more rows]

## Sheet: Table S1-3
Table S1-3. Total proteins quantified (No.peptides≧2) in leaf proteome from switchgrass plants under drought treatment conditions.
[truncated: 5,682 more rows]

[truncated: 2 more sheets: Table S1-4, TableS1-5]
