# Supplementary material for: Drought-Induced Leaf Proteome Changes in Switchgrass Seedlings
Source: Int J Mol Sci. 2016 Aug 2;17(8):1251. doi: 10.3390/ijms17081251 (PMC5000649; doi:10.3390/ijms17081251)
Supplement: Supplementary file 1 [file ijms-17-01251-s001.zip › Supplemental Table S2.xlsx]

## Sheet: S2-1_CrudeProteinExtracts
Supplemental Table S2-1. The abundance value of peptides detected from the crude leaves protein extracts in switchgrass
prot_hit_num	prot_acc	prot_desc	prot_score	prot_mass	prot_matches	prot_matches_sig	prot_sequences	prot_sequences_sig	prot_cover	pep_query	pep_rank	pep_isbold	pep_isunique	pep_exp_mz	pep_exp_mr	pep_exp_z	pep_calc_mr	pep_delta	pep_miss	pep_score	pep_homol	pep_ident	pep_expect	pep_res_before	pep_seq	pep_res_after	pep_var_mod	pep_var_mod_pos	pep_scan_title	113(Ctr1)	115(Ctr2)	117(Ctr3)	118(Ctr4)	114(Tr1)	116(Tr2)	119(Tr3)	121(Tr4)
1	Pavir.J40504.1	Pavir.J40504.1	29893	42542	958	958	20	20	64.5	395561	1	1	1	953.519	2857.54	3	2857.54	-0.006	0	56.22	17	31	0.00016	R	LTYTLDEIEGPLEVGSDGTLK	F			File837 Spectrum257288 scans: 22069	25881.1	23340.6	26514.1	25800.5	17007	19417.7	23533.5	32131.9
1	Pavir.J40504.1	Pavir.J40504.1	29893	42542	958	958	20	20	64.5	395514	1	1	1	953.518	2857.53	3	2857.54	-0.0116	0	47.06	17	31	0.0014	R	LTYTLDEIEGPLEVGSDGTLK	F			File837 Spectrum261559 scans: 26637	21456.7	25708.5	18864.1	23550.6	13127.6	20620.2	22876.6	24934.2
1	Pavir.J40504.1	Pavir.J40504.1	29893	42542	958	958	20	20	64.5	395554	1	1	1	953.519	2857.54	3	2857.54	-0.0061	0	63.18		31	3.3e-05	R	LTYTLDEIEGPLEVGSDGTLK	F			File844 Spectrum421768 scans: 26873	18318.4	65004.5	24934.3	47708.8	14376.4	11770.4	17970.6	32154.3
1	Pavir.J40504.1	Pavir.J40504.1	29893	42542	958	958	20	20	64.5	395587	1	1	1	953.52	2857.54	3	2857.54	-0.0041	0	62.05		31	4.2e-05	R	LTYTLDEIEGPLEVGSDGTLK	F			File837 Spectrum257245 scans: 22023	15708.8	19973.8	18107.8	18771.6	10993.7	13512.7	16889.1	26245.9
1	Pavir.J40504.1	Pavir.J40504.1	29893	42542	958	958	20	20	64.5	395631	1	1	1	953.521	2857.54	3	2857.54	-0.0016	0	65.16	17	31	2.1e-05	R	LTYTLDEIEGPLEVGSDGTLK	F			File844 Spectrum421843 scans: 26953	15518	40580.6	20416.7	32662.5	9707.2	11479.6	13687.7	21593.2
1	Pavir.J40504.1	Pavir.J40504.1	29893	42542	958	958	20	20	64.5	395671	1	1	1	953.522	2857.54	3	2857.54	0.0012	0	59.81		31	7e-05	R	LTYTLDEIEGPLEVGSDGTLK	F			File845 Spectrum446135 scans: 27563	15012.4	14611.8	10996.3	17266.5	11946.5	10728.1	13659.7	14731.8
1	Pavir.J40504.1	Pavir.J40504.1	29893	42542	958	958	20	20	64.5	395651	1	1	1	953.521	2857.54	3	2857.54	-0.0003	0	72.21		31	4.1e-06	R	LTYTLDEIEGPLEVGSDGTLK	F			File843 Spectrum398771 scans: 27318	14112.6	28635.9	18734	24361.4	9911.47	13396.3	15056.8	23790.6
1	Pavir.J40504.1	Pavir.J40504.1	29893	42542	958	958	20	20	64.5	446727	1	1	1	1232.67	3694.99	3	3695	-0.0093	1	69.22	20	30	7.3e-06	R	LTYTLDEIEGPLEVGSDGTLKFEEK	D			File840 Spectrum328630 scans: 27118	13541.9	7778.63	12910.7	11971.4	12882.2	16519	15199	8467.98
1	Pavir.J40504.1	Pavir.J40504.1	29893	42542	958	958	20	20	64.5	395566	1	1	1	953.519	2857.54	3	2857.54	-0.0056	0	38.93	16	31	0.0087	R	LTYTLDEIEGPLEVGSDGTLK	F			File840 Spectrum322300 scans: 20366	13120.5	17227.5	15121.4	16815.2	13418	13346.3	18496.1	18857.6
1	Pavir.J40504.1	Pavir.J40504.1	29893	42542	958	958	20	20	64.5	395573	1	1	1	953.52	2857.54	3	2857.54	-0.0051	0	58.54	16	31	9.5e-05	R	LTYTLDEIEGPLEVGSDGTLK	F			File837 Spectrum258563 scans: 23429	13032	11136.3	8884.69	11698.2	5543.93	6523.05	5875.26	6870.35
1	Pavir.J40504.1	Pavir.J40504.1	29893	42542	958	958	20	20	64.5	446728	1	1	1	1232.67	3694.99	3	3695	-0.0093	1	52.05	21	30	0.00038	R	LTYTLDEIEGPLEVGSDGTLKFEEK	D			File837 Spectrum260607 scans: 25609	12877.9	6225.79	11878.4	7913.88	11480.2	11149	12757.8	9529.7
1	Pavir.J40504.1	Pavir.J40504.1	29893	42542	958	958	20	20	64.5	395525	1	1	1	715.39	2857.53	4	2857.54	-0.0098	0	35.16	15	31	0.021	R	LTYTLDEIEGPLEVGSDGTLK	F			File840 Spectrum322168 scans: 20225	12708.8	13892.3	17835.9	14561.5	11954.8	11407.1	12922.8	16166.9
1	Pavir.J40504.1	Pavir.J40504.1	29893	42542	958	958	20	20	64.5	395683	1	1	1	953.522	2857.55	3	2857.54	0.0032	0	69.76	18	31	7.2e-06	R	LTYTLDEIEGPLEVGSDGTLK	F			File845 Spectrum446105 scans: 27531	11204.3	15874.9	12548.5	13800.7	9394.88	12540.2	13098.9	12310.1
1	Pavir.J40504.1	Pavir.J40504.1	29893	42542	958	958	20	20	64.5	446735	1	1	1	924.755	3694.99	4	3695	-0.0064	1	56.51	22	30	0.00013	R	LTYTLDEIEGPLEVGSDGTLKFEEK	D			File837 Spectrum257608 scans: 22410	11178.9	7822.73	11490.1	8937.23	9019.69	11005.8	10386.6	6668.55
1	Pavir.J40504.1	Pavir.J40504.1	29893	42542	958	958	20	20	64.5	395612	1	1	1	953.521	2857.54	3	2857.54	-0.0023	0	49.04	18	31	0.00084	R	LTYTLDEIEGPLEVGSDGTLK	F			File841 Spectrum345658 scans: 20357	11069.2	15426.8	12700.3	12897.8	11357.9	11441.9	14110.2	14507.6
1	Pavir.J40504.1	Pavir.J40504.1	29893	42542	958	958	20	20	64.5	395652	1	1	1	953.521	2857.54	3	2857.54	-0.0003	0	43.59	16	31	0.003	R	LTYTLDEIEGPLEVGSDGTLK	F			File841 Spectrum345651 scans: 20349	9909.11	10336.9	9340.21	10965.8	7207.79	7629.3	10791.7	10860.5
1	Pavir.J40504.1	Pavir.J40504.1	29893	42542	958	958	20	20	64.5	395698	1	1	1	953.524	2857.55	3	2857.54	0.0076	0	62.38		31	3.8e-05	R	LTYTLDEIEGPLEVGSDGTLK	F			File827 Spectrum23276 scans: 27962	9663.69	9107.59	10515.6	11018.3	7565.18	7801.22	10251.3	11850.5
1	Pavir.J40504.1	Pavir.J40504.1	29893	42542	958	958	20	20	64.5	395672	1	1	1	953.522	2857.54	3	2857.54	0.0012	0	43.1		31	0.0033	R	LTYTLDEIEGPLEVGSDGTLK	F			File841 Spectrum345633 scans: 20330	9567.32	10110	9033.93	10007.7	7922.92	6943.19	9647.61	10877.3
1	Pavir.J40504.1	Pavir.J40504.1	29893	42542	958	958	20	20	64.5	395553	1	1	1	953.519	2857.54	3	2857.54	-0.0063	0	55.97	18	31	0.00017	R	LTYTLDEIEGPLEVGSDGTLK	F			File837 Spectrum261680 scans: 26766	9098.4	8356.48	8175.34	8379.82	6267.94	7669.49	7876.11	7615.91
1	Pavir.J40504.1	Pavir.J40504.1	29893	42542	958	958	20	20	64.5	395625	1	1	1	953.521	2857.54	3	2857.54	-0.0018	0	58.59		31	9.4e-05	R	LTYTLDEIEGPLEVGSDGTLK	F			File844 Spectrum421678 scans: 26777	9019.02	30724.7	17694.1	22359.8	7571.75	4949.5	11499.4	17613.1
1	Pavir.J40504.1	Pavir.J40504.1	29893	42542	958	958	20	20	64.5	395520	1	1	1	953.518	2857.53	3	2857.54	-0.0102	0	49.12	18	31	0.00085	R	LTYTLDEIEGPLEVGSDGTLK	F			File840 Spectrum322214 scans: 20274	8919.27	9722.04	10733.7	13652.5	8881.27	7202.7	10911.7	10947.9
1	Pavir.J40504.1	Pavir.J40504.1	29893	42542	958	958	20	20	64.5	395688	1	1	1	953.523	2857.55	3	2857.54	0.0039	0	61.79	17	31	4.5e-05	R	LTYTLDEIEGPLEVGSDGTLK	F			File843 Spectrum398803 scans: 27352	8400.35	13091.1	8972.34	11578.1	3684.19	4585.34	5591.18	10052.1
1	Pavir.J40504.1	Pavir.J40504.1	29893	42542	958	958	20	20	64.5	395568	1	1	1	953.519	2857.54	3	2857.54	-0.0056	0	46.43		31	0.0015	R	LTYTLDEIEGPLEVGSDGTLK	F			File846 Spectrum470215 scans: 27608	8253.12	9798.83	7935.63	9204.27	7605.6	8038.35	8705.13	13476.1
1	Pavir.J40504.1	Pavir.J40504.1	29893	42542	958	958	20	20	64.5	395649	1	1	1	953.521	2857.54	3	2857.54	-0.0007	0	61.34		31	5e-05	R	LTYTLDEIEGPLEVGSDGTLK	F			File839 Spectrum303634 scans: 24353	8237.44	5554.93	7859.1	7159.32	2914.06	2685.93	2675.09	3490.11
1	Pavir.J40504.1	Pavir.J40504.1	29893	42542	958	958	20	20	64.5	446734	1	1	1	924.755	3694.99	4	3695	-0.0069	1	49.98	19	30	0.00061	R	LTYTLDEIEGPLEVGSDGTLKFEEK	D			File842 Spectrum374879 scans: 26995	7540.59	5069	8848.2	6763.98	7423.65	7695.95	8130.43	6268.3
1	Pavir.J40504.1	Pavir.J40504.1	29893	42542	958	958	20	20	64.5	395692	1	1	1	953.523	2857.55	3	2857.54	0.0048	0	61.11	17	31	5.2e-05	R	LTYTLDEIEGPLEVGSDGTLK	F			File843 Spectrum395349 scans: 23667	7449.43	7709.47	6535.48	8769.73	4836.33	6695.09	7967.99	8216.84
1	Pavir.J40504.1	Pavir.J40504.1	29893	42542	958	958	20	20	64.5	446726	1	1	1	924.754	3694.99	4	3695	-0.0093	1	38.45	18	30	0.0087	R	LTYTLDEIEGPLEVGSDGTLKFEEK	D			File843 Spectrum398472 scans: 26999	6973.84	24824.3	14098.7	18936.9	7981.6	8560.74	6001.08	10016.3
1	Pavir.J40504.1	Pavir.J40504.1	29893	42542	958	958	20	20	64.5	446720	1	1	1	924.753	3694.98	4	3695	-0.012	1	44.54	19	30	0.0021	R	LTYTLDEIEGPLEVGSDGTLKFEEK	D			File842 Spectrum374844 scans: 26958	6895.62	6233.64	6827.94	4413.04	6058.54	7321.41	6943.53	5819.84
1	Pavir.J40504.1	Pavir.J40504.1	29893	42542	958	958	20	20	64.5	395540	1	1	1	953.519	2857.53	3	2857.54	-0.0076	0	71.02		31	5.5e-06	R	LTYTLDEIEGPLEVGSDGTLK	F			File829 Spectrum72484 scans: 28030	6846.44	7129.19	6359.87	7253.14	5438.76	6205.76	7747.9	8157.42
1	Pavir.J40504.1	Pavir.J40504.1	29893	42542	958	958	20	20	64.5	395682	1	1	1	953.522	2857.54	3	2857.54	0.0026	0	66.01	18	31	1.7e-05	R	LTYTLDEIEGPLEVGSDGTLK	F			File846 Spectrum470303 scans: 27702	6824.5	8684.93	7938.81	9969.67	6106.82	4044.33	8590.83	7954.49
1	Pavir.J40504.1	Pavir.J40504.1	29893	42542	958	958	20	20	64.5	395626	1	1	1	953.521	2857.54	3	2857.54	-0.0018	0	38.52	16	31	0.0096	R	LTYTLDEIEGPLEVGSDGTLK	F			File841 Spectrum345731 scans: 20435	6765.91	10382.9	7196.22	8460.76	7663.87	8449.24	11195.1	10800
1	Pavir.J40504.1	Pavir.J40504.1	29893	42542	958	958	20	20	64.5	395545	1	1	1	953.519	2857.54	3	2857.54	-0.0067	0	54.37		31	0.00025	R	LTYTLDEIEGPLEVGSDGTLK	F			File844 Spectrum421945 scans: 27061	6652.6	13487.3	7812.97	11467	6969.18	7676.65	6991.52	11137.4
1	Pavir.J40504.1	Pavir.J40504.1	29893	42542	958	958	20	20	64.5	395569	1	1	1	953.519	2857.54	3	2857.54	-0.0054	0	64.82		31	2.2e-05	R	LTYTLDEIEGPLEVGSDGTLK	F			File842 Spectrum375248 scans: 27389	6636.38	7204.34	5740	10613.9	4739.61	5638.74	7135.5	9767.38
1	Pavir.J40504.1	Pavir.J40504.1	29893	42542	958	958	20	20	64.5	395544	1	1	1	953.519	2857.54	3	2857.54	-0.0067	0	62.06	19	31	4.3e-05	R	LTYTLDEIEGPLEVGSDGTLK	F			File837 Spectrum259089 scans: 23990	6429.37	6149.06	5578.58	5331.51	2823.85	5440.07	5942.61	4394.87
1	Pavir.J40504.1	Pavir.J40504.1	29893	42542	958	958	20	20	64.5	395586	1	1	1	953.52	2857.54	3	2857.54	-0.0041	0	74.24	18	31	2.6e-06	R	LTYTLDEIEGPLEVGSDGTLK	F			File828 Spectrum47867 scans: 27874	6108.59	5861.35	6699.54	6319.22	4269.79	4827.99	7055.12	8521.79
1	Pavir.J40504.1	Pavir.J40504.1	29893	42542	958	958	20	20	64.5	446729	1	1	1	924.754	3694.99	4	3695	-0.0091	1	36.44	23	30	0.014	R	LTYTLDEIEGPLEVGSDGTLKFEEK	D			File837 Spectrum257576 scans: 22376	6098.51	4386.47	5642.56	6777.33	5715.19	6188.73	7050.16	3702.01
1	Pavir.J40504.1	Pavir.J40504.1	29893	42542	958	958	20	20	64.5	395695	1	1	1	953.523	2857.55	3	2857.54	0.0054	0	45.36	15	31	0.002	R	LTYTLDEIEGPLEVGSDGTLK	F			File845 Spectrum446229 scans: 27663	6086.32	7393.27	7402.24	6176.77	4271.66	4377.58	5788.11	6500.37
1	Pavir.J40504.1	Pavir.J40504.1	29893	42542	958	958	20	20	64.5	446722	1	1	1	1232.67	3694.99	3	3695	-0.0107	1	50.95	19	30	0.00049	R	LTYTLDEIEGPLEVGSDGTLKFEEK	D			File840 Spectrum328681 scans: 27172	6019.09	2973.46	6815.07	5347.32	6622.95	6352.64	8484.75	4712.16
1	Pavir.J40504.1	Pavir.J40504.1	29893	42542	958	958	20	20	64.5	446719	1	1	1	924.753	3694.98	4	3695	-0.0125	1	44.56	17	30	0.0021	R	LTYTLDEIEGPLEVGSDGTLKFEEK	D			File840 Spectrum328382 scans: 26853	5985.66	4460.41	6211.31	5119.44	6275.89	6677.13	7065.58	5760.42
1	Pavir.J40504.1	Pavir.J40504.1	29893	42542	958	958	20	20	64.5	446717	1	1	1	924.753	3694.98	4	3695	-0.014	1	52.63	23	30	0.00033	R	LTYTLDEIEGPLEVGSDGTLKFEEK	D			File842 Spectrum374909 scans: 27027	5971.63	6022.71	7552.2	5872.07	6525.83	7333.93	8133.84	6582.22
1	Pavir.J40504.1	Pavir.J40504.1	29893	42542	958	958	20	20	64.5	395581	1	1	1	953.52	2857.54	3	2857.54	-0.0045	0	65.21		31	2e-05	R	LTYTLDEIEGPLEVGSDGTLK	F			File844 Spectrum421974 scans: 27092	5953.7	11354.2	7067.3	10173.7	5877.27	5908.93	7570.21	9256.14
1	Pavir.J40504.1	Pavir.J40504.1	29893	42542	958	958	20	20	64.5	395549	1	1	1	953.519	2857.54	3	2857.54	-0.0065	0	50		31	0.00069	R	LTYTLDEIEGPLEVGSDGTLK	F			File839 Spectrum303566 scans: 24280	5911.86	7135.6	5759.71	7768.48	3895.35	3739.85	4681.06	4547.35
1	Pavir.J40504.1	Pavir.J40504.1	29893	42542	958	958	20	20	64.5	395617	1	1	1	953.521	2857.54	3	2857.54	-0.0021	0	57.65		31	0.00012	R	LTYTLDEIEGPLEVGSDGTLK	F			File837 Spectrum257374 scans: 22160	5770.09	5313.71	5474.54	6557.77	3843.12	5327.67	4191.85	5547.41
1	Pavir.J40504.1	Pavir.J40504.1	29893	42542	958	958	20	20	64.5	395560	1	1	1	953.519	2857.54	3	2857.54	-0.006	0	68.34		31	1e-05	R	LTYTLDEIEGPLEVGSDGTLK	F			File837 Spectrum258597 scans: 23465	5255.15	6451.26	4816.13	5876.32	3946.46	3346.07	4235.08	4788.39
1	Pavir.J40504.1	Pavir.J40504.1	29893	42542	958	958	20	20	64.5	395575	1	1	1	953.52	2857.54	3	2857.54	-0.0047	0	52.88	17	31	0.00035	R	LTYTLDEIEGPLEVGSDGTLK	F			File841 Spectrum351482 scans: 26569	5103.56	4136.13	3204.67	4855.98	3808.88	2448.16	4169.11	3887
1	Pavir.J40504.1	Pavir.J40504.1	29893	42542	958	958	20	20	64.5	446733	1	1	1	924.755	3694.99	4	3695	-0.0069	1	48.78	19	30	0.0008	R	LTYTLDEIEGPLEVGSDGTLKFEEK	D			File843 Spectrum398428 scans: 26952	4923.4	22100.2	14957.6	18566.7	7231.3	8641.87	7757.64	9344.71
1	Pavir.J40504.1	Pavir.J40504.1	29893	42542	958	958	20	20	64.5	446709	1	1	1	924.751	3694.98	4	3695	-0.0201	1	50.08	22	31	0.00063	R	LTYTLDEIEGPLEVGSDGTLKFEEK	D			File842 Spectrum374803 scans: 26914	4823.05	3790.25	5525.04	4056.29	4091.65	4645.98	5550.35	2719.89
1	Pavir.J40504.1	Pavir.J40504.1	29893	42542	958	958	20	20	64.5	446750	1	1	1	924.759	3695.01	4	3695	0.0117	1	47.85	18	30	0.00089	R	LTYTLDEIEGPLEVGSDGTLKFEEK	D			File839 Spectrum302741 scans: 23400	4766.54	3492.11	5110.16	3702.01	4431.21	4302.15	4550.72	3824.21	emPAI	60.38	Quantitation summary for protein	113/115	0.727	109	[1.064]		114/115	0.595	108	1.064
1	Pavir.J40504.1	Pavir.J40504.1	29893	42542	958	958	20	20	64.5	395521	1	1	1	953.518	2857.53	3	2857.54	-0.01	0	52.61		31	0.00038	R	LTYTLDEIEGPLEVGSDGTLK	F			File844 Spectrum422154 scans: 27284	4736.29	11097.1	7397.2	8717.91	3354.15	4034.46	5931.27	6622.58
1	Pavir.J40504.1	Pavir.J40504.1	29893	42542	958	958	20	20	64.5	395577	1	1	1	953.52	2857.54	3	2857.54	-0.0047	0	60.26		31	6.4e-05	R	LTYTLDEIEGPLEVGSDGTLK	F			File828 Spectrum47923 scans: 27933	4705.89	5898.92	5167.13	6203.11	3295.11	4268.06	5846.97	6421.89
1	Pavir.J40504.1	Pavir.J40504.1	29893	42542	958	958	20	20	64.5	395535	1	1	1	953.519	2857.53	3	2857.54	-0.0084	0	60.5		31	6.1e-05	R	LTYTLDEIEGPLEVGSDGTLK	F			File829 Spectrum72514 scans: 28062	4691.59	4752.84	4194.8	5200.3	2370.86	3862.51	4514.91	5901.69
1	Pavir.J40504.1	Pavir.J40504.1	29893	42542	958	958	20	20	64.5	446730	1	1	1	924.755	3694.99	4	3695	-0.0074	1	45.71	17	30	0.0016	R	LTYTLDEIEGPLEVGSDGTLKFEEK	D			File837 Spectrum260480 scans: 25473	4427.19	4383.89	4656.25	3536.55	3891.78	3687.7	3976.29	3485.63
1	Pavir.J40504.1	Pavir.J40504.1	29893	42542	958	958	20	20	64.5	395584	1	1	1	953.52	2857.54	3	2857.54	-0.0043	0	61.2		31	5.2e-05	R	LTYTLDEIEGPLEVGSDGTLK	F			File843 Spectrum398541 scans: 27072	4375.4	7836.99	4570.35	6592.63	3542.17	3263.75	5032.3	5873.66
1	Pavir.J40504.1	Pavir.J40504.1	29893	42542	958	958	20	20	64.5	446747	1	1	1	924.757	3695	4	3695	0.0036	1	46.48	19	30	0.0013	R	LTYTLDEIEGPLEVGSDGTLKFEEK	D			File840 Spectrum327838 scans: 26273	4365.8	2974.17	4613.83	4056.58	4535.69	4108.49	4854.54	2723.25
1	Pavir.J40504.1	Pavir.J40504.1	29893	42542	958	958	20	20	64.5	395539	1	1	1	953.519	2857.53	3	2857.54	-0.0076	0	46.44	19	31	0.0016	R	LTYTLDEIEGPLEVGSDGTLK	F			File840 Spectrum322191 scans: 20249	4357.91	3506.29	3807.35	5116.86	3248.01	2488.56	4841.17	4032.74
1	Pavir.J40504.1	Pavir.J40504.1	29893	42542	958	958	20	20	64.5	395677	1	1	1	953.522	2857.54	3	2857.54	0.0019	0	47.74		31	0.0011	R	LTYTLDEIEGPLEVGSDGTLK	F			File827 Spectrum23220 scans: 27902	4305.52	4337.27	4669.8	5121.72	3260.7	4139.76	5201.79	5786.21
1	Pavir.J40504.1	Pavir.J40504.1	29893	42542	958	958	20	20	64.5	446743	1	1	1	924.756	3695	4	3695	-0.0003	1	42.65	18	30	0.0032	R	LTYTLDEIEGPLEVGSDGTLKFEEK	D			File841 Spectrum351913 scans: 27029	4200.45	1683.56	4211.99	2337.8	3217.28	3327.64	3604.03	2587.59
1	Pavir.J40504.1	Pavir.J40504.1	29893	42542	958	958	20	20	64.5	395523	1	1	1	953.518	2857.53	3	2857.54	-0.0098	0	38.94		31	0.0089	R	LTYTLDEIEGPLEVGSDGTLK	F			File842 Spectrum374954 scans: 27075	4197.46	4862.17	5144.54	5056.45	3927.08	3943.15	3844.03	4150.46
1	Pavir.J40504.1	Pavir.J40504.1	29893	42542	958	958	20	20	64.5	395567	1	1	1	953.519	2857.54	3	2857.54	-0.0056	0	54		31	0.00027	R	LTYTLDEIEGPLEVGSDGTLK	F			File837 Spectrum259767 scans: 24713	4135.51	4241.32	3955.14	4628.04	3226.85	3907.53	3612.5	4522.68
1	Pavir.J40504.1	Pavir.J40504.1	29893	42542	958	958	20	20	64.5	446745	1	1	1	924.757	3695	4	3695	0.0014	1	39.06	19	30	0.0071	R	LTYTLDEIEGPLEVGSDGTLKFEEK	D			File840 Spectrum327901 scans: 26340	3967.64	3002.92	3623.42	3283.4	4674.54	3492.39	3905.52	3234.49
1	Pavir.J40504.1	Pavir.J40504.1	29893	42542	958	958	20	20	64.5	395515	1	1	1	953.518	2857.53	3	2857.54	-0.0113	0	62.48		31	4e-05	R	LTYTLDEIEGPLEVGSDGTLK	F			File837 Spectrum260043 scans: 25007	3945.51	5213.43	3174.54	3406.84	3959.1	3142.96	2988.21	4299.58
1	Pavir.J40504.1	Pavir.J40504.1	29893	42542	958	958	20	20	64.5	395634	1	1	1	953.521	2857.54	3	2857.54	-0.0014	0	58.7	20	31	9.1e-05	R	LTYTLDEIEGPLEVGSDGTLK	F			File829 Spectrum72467 scans: 28012	3872.68	5647.72	4789.02	7751.49	4885.61	3176.47	5206.81	7383.83
1	Pavir.J40504.1	Pavir.J40504.1	29893	42542	958	958	20	20	64.5	395679	1	1	1	953.522	2857.54	3	2857.54	0.0021	0	76.08	17	31	1.7e-06	R	LTYTLDEIEGPLEVGSDGTLK	F			File844 Spectrum422102 scans: 27229	3871.92	8402.97	3623.77	7293.01	2659.16	3369.7	3706.7	7055.34
1	Pavir.J40504.1	Pavir.J40504.1	29893	42542	958	958	20	20	64.5	395640	1	1	1	953.521	2857.54	3	2857.54	-0.001	0	65.25		31	2e-05	R	LTYTLDEIEGPLEVGSDGTLK	F			File830 Spectrum96136 scans: 27237	3827.37	4940.62	3788.97	4564.7	3263.6	3138.07	3486.38	4299.58
1	Pavir.J40504.1	Pavir.J40504.1	29893	42542	958	958	20	20	64.5	395673	1	1	1	953.522	2857.54	3	2857.54	0.0014	0	73.4		31	3.1e-06	R	LTYTLDEIEGPLEVGSDGTLK	F			File837 Spectrum260072 scans: 25038	3575.79	3458.54	2594.71	3561.64	2755.37	3271.68	3152.96	4309.67
1	Pavir.J40504.1	Pavir.J40504.1	29893	42542	958	958	20	20	64.5	395534	1	1	1	953.519	2857.53	3	2857.54	-0.0085	0	54.77	16	31	0.00023	R	LTYTLDEIEGPLEVGSDGTLK	F			File830 Spectrum96121 scans: 27221	3514.07	4389.99	4054.09	4080.61	3133.88	2885.22	4379.51	5131.46
1	Pavir.J40504.1	Pavir.J40504.1	29893	42542	958	958	20	20	64.5	446725	1	1	1	924.754	3694.99	4	3695	-0.0096	1	43.28	17	30	0.0029	R	LTYTLDEIEGPLEVGSDGTLKFEEK	D			File843 Spectrum398359 scans: 26878	3447	14428.5	9635.71	9948.44	5168.35	4399.35	4596.49	5907.29
1	Pavir.J40504.1	Pavir.J40504.1	29893	42542	958	958	20	20	64.5	446749	1	1	1	924.759	3695.01	4	3695	0.0092	1	37.6	15	30	0.0096	R	LTYTLDEIEGPLEVGSDGTLKFEEK	D			File843 Spectrum398542 scans: 27073	3355.07	13885.4	5599.99	6115.47	2659.79	2242.53	2842.72	2663.83
1	Pavir.J40504.1	Pavir.J40504.1	29893	42542	958	958	20	20	64.5	446737	1	1	1	924.755	3694.99	4	3695	-0.0059	1	42.82	22	30	0.0031	R	LTYTLDEIEGPLEVGSDGTLKFEEK	D			File840 Spectrum327854 scans: 26290	3239.52	2829.36	4262.31	2703.89	4302.36	3608.46	4148.99	3233.37
1	Pavir.J40504.1	Pavir.J40504.1	29893	42542	958	958	20	20	64.5	395589	1	1	1	953.52	2857.54	3	2857.54	-0.0038	0	51.79		31	0.00045	R	LTYTLDEIEGPLEVGSDGTLK	F			File843 Spectrum398835 scans: 27386	3061.82	4955.05	3450.46	4422.04	2157.75	1776.64	2880.19	2862.27
1	Pavir.J40504.1	Pavir.J40504.1	29893	42542	958	958	20	20	64.5	395505	1	1	1	953.516	2857.53	3	2857.54	-0.0151	0	67.83		31	1.2e-05	R	LTYTLDEIEGPLEVGSDGTLK	F			File844 Spectrum421571 scans: 26662	2954.89	9519.77	4710.94	8592.68	2506.35	3076.32	3375.15	5526.1
1	Pavir.J40504.1	Pavir.J40504.1	29893	42542	958	958	20	20	64.5	395532	1	1	1	953.518	2857.53	3	2857.54	-0.0087	0	68.13		31	1e-05	R	LTYTLDEIEGPLEVGSDGTLK	F			File829 Spectrum72529 scans: 28078	2946.5	3867.82	2991.73	5020.37	2373.02	2840.26	3122.39	4411.69
1	Pavir.J40504.1	Pavir.J40504.1	29893	42542	958	958	20	20	64.5	395548	1	1	1	953.519	2857.54	3	2857.54	-0.0065	0	75.88		31	1.8e-06	R	LTYTLDEIEGPLEVGSDGTLK	F			File836 Spectrum240170 scans: 27380	2866.63	3988.42	2291.45	2572.95	1623.5	2283.66	2823.02	2979.99
1	Pavir.J40504.1	Pavir.J40504.1	29893	42542	958	958	20	20	64.5	395632	1	1	1	953.521	2857.54	3	2857.54	-0.0016	0	71.58	17	31	4.7e-06	R	LTYTLDEIEGPLEVGSDGTLK	F			File831 Spectrum119807 scans: 27486	2824.98	2799.81	2866.71	2689.54	1727.33	2419.24	2734.25	2772.58
1	Pavir.J40504.1	Pavir.J40504.1	29893	42542	958	958	20	20	64.5	446711	1	1	1	924.752	3694.98	4	3695	-0.0167	1	45.93	18	30	0.0016	R	LTYTLDEIEGPLEVGSDGTLKFEEK	D			File842 Spectrum374958 scans: 27079	2770.15	2237.35	2954.79	2413.75	3396.23	3568.25	3090.66	2592.08
1	Pavir.J40504.1	Pavir.J40504.1	29893	42542	958	958	20	20	64.5	446748	1	1	1	924.757	3695	4	3695	0.0046	1	47.04	18	30	0.0011	R	LTYTLDEIEGPLEVGSDGTLKFEEK	D			File837 Spectrum260519 scans: 25515	2766.53	4161.64	4124.65	3504.6	3771.12	3858.14	3841.2	4705.43
1	Pavir.J40504.1	Pavir.J40504.1	29893	42542	958	958	20	20	64.5	395518	1	1	1	953.518	2857.53	3	2857.54	-0.0106	0	64.88	17	31	2.3e-05	R	LTYTLDEIEGPLEVGSDGTLK	F			File837 Spectrum259580 scans: 24513	2726.26	2458.87	2440.43	3395.73	1826.72	2604.06	2023.02	2273.67
1	Pavir.J40504.1	Pavir.J40504.1	29893	42542	958	958	20	20	64.5	395580	1	1	1	953.52	2857.54	3	2857.54	-0.0045	0	50.79	18	31	0.00056	R	LTYTLDEIEGPLEVGSDGTLK	F			File837 Spectrum259754 scans: 24699	2692.5	3586.91	3114.12	3089.22	2617.21	1861.98	2861.32	3797.3
1	Pavir.J40504.1	Pavir.J40504.1	29893	42542	958	958	20	20	64.5	395576	1	1	1	953.52	2857.54	3	2857.54	-0.0047	0	61.57	17	31	4.7e-05	R	LTYTLDEIEGPLEVGSDGTLK	F			File844 Spectrum422194 scans: 27327	2663.41	5946.22	3814.11	6255.74	1820.85	2725.75	3037.63	5434.17
1	Pavir.J40504.1	Pavir.J40504.1	29893	42542	958	958	20	20	64.5	395552	1	1	1	953.519	2857.54	3	2857.54	-0.0063	0	50.43	16	31	0.00062	R	LTYTLDEIEGPLEVGSDGTLK	F			File841 Spectrum352204 scans: 27339	2557.5	2437.69	1616.48	2352.24	1662.88	1152.5	2128.38	2556.2
1	Pavir.J40504.1	Pavir.J40504.1	29893	42542	958	958	20	20	64.5	395551	1	1	1	953.519	2857.54	3	2857.54	-0.0063	0	45.3		31	0.002	R	LTYTLDEIEGPLEVGSDGTLK	F			File837 Spectrum259741 scans: 24685	2395.88	3400.71	2998.05	2906.06	2362.68	1676	2647.32	2754.64
1	Pavir.J40504.1	Pavir.J40504.1	29893	42542	958	958	20	20	64.5	395517	1	1	1	953.518	2857.53	3	2857.54	-0.0109	0	62.79		31	3.7e-05	R	LTYTLDEIEGPLEVGSDGTLK	F			File840 Spectrum328168 scans: 26625	2206.67	2166.11	2287.55	2130.43	1710.8	1895.96	2555.57	2458.66
1	Pavir.J40504.1	Pavir.J40504.1	29893	42542	958	958	20	20	64.5	395613	1	1	1	953.521	2857.54	3	2857.54	-0.0023	0	58.9	17	31	8.7e-05	R	LTYTLDEIEGPLEVGSDGTLK	F			File839 Spectrum305852 scans: 26719	2037.09	6524.24	3309.02	4721.17	3035.17	1916.59	3307.19	9583.51
1	Pavir.J40504.1	Pavir.J40504.1	29893	42542	958	958	20	20	64.5	395533	1	1	1	953.518	2857.53	3	2857.54	-0.0087	0	57.59		31	0.00012	R	LTYTLDEIEGPLEVGSDGTLK	F			File839 Spectrum306108 scans: 26992	1683.09	2726.05	1437.96	1994.82	1907.38	2146.11	2154.84	2101.02
1	Pavir.J40504.1	Pavir.J40504.1	29893	42542	958	958	20	20	64.5	395668	1	1	1	953.522	2857.54	3	2857.54	0.0008	0	75.19		31	2e-06	R	LTYTLDEIEGPLEVGSDGTLK	F			File841 Spectrum351801 scans: 26909	1668.7	2039.31	1983.84	2459.61	1292.69	1480.45	1791.42	2330.85
1	Pavir.J40504.1	Pavir.J40504.1	29893	42542	958	958	20	20	64.5	395547	1	1	1	953.519	2857.54	3	2857.54	-0.0065	0	62.42		31	3.9e-05	R	LTYTLDEIEGPLEVGSDGTLK	F			File836 Spectrum240151 scans: 27360	1637.14	2315.16	1699.02	2055.44	1253.12	1342.46	1673.81	2180.62
1	Pavir.J40504.1	Pavir.J40504.1	29893	42542	958	958	20	20	64.5	395559	1	1	1	953.519	2857.54	3	2857.54	-0.006	0	58.76	17	31	9.1e-05	R	LTYTLDEIEGPLEVGSDGTLK	F			File839 Spectrum305882 scans: 26751	1302.99	4955.59	2286.73	3833.27	3283.11	1522.03	3497.04	6289.6
1	Pavir.J40504.1	Pavir.J40504.1	29893	42542	958	958	20	20	64.5	395606	1	1	1	953.52	2857.54	3	2857.54	-0.0027	0	64.95		31	2.2e-05	R	LTYTLDEIEGPLEVGSDGTLK	F			File837 Spectrum262187 scans: 27316	1292.11	1305.85	1254.55	1435.93	801.01	1175.06	1507.58	1676.11
1	Pavir.J40504.1	Pavir.J40504.1	29893	42542	958	958	20	20	64.5	395669	1	1	1	953.522	2857.54	3	2857.54	0.001	0	68.71	18	31	9.1e-06	R	LTYTLDEIEGPLEVGSDGTLK	F			File831 Spectrum119871 scans: 27554	1225.82	1246.88	1245.81	1361.13	649.896	769.967	887.905	1319.58
1	Pavir.J40504.1	Pavir.J40504.1	29893	42542	958	958	20	20	64.5	395596	1	1	1	953.52	2857.54	3	2857.54	-0.0032	0	60.89		31	5.5e-05	R	LTYTLDEIEGPLEVGSDGTLK	F			File837 Spectrum262170 scans: 27289	1114.26	1165.8	1159.55	1206.96	576.414	774.778	1127.66	1441.79
1	Pavir.J40504.1	Pavir.J40504.1	29893	42542	958	958	20	20	64.5	395524	1	1	1	953.518	2857.53	3	2857.54	-0.0098	0	62.2		31	4.2e-05	R	LTYTLDEIEGPLEVGSDGTLK	F			File836 Spectrum240293 scans: 27511	881.36	1227.3	987.181	1190.57	719.517	751.425	957.634	905.882
1	Pavir.J40504.1	Pavir.J40504.1	29893	42542	958	958	20	20	64.5	395621	1	1	1	953.521	2857.54	3	2857.54	-0.0019	0	65.35	17	31	2e-05	R	LTYTLDEIEGPLEVGSDGTLK	F			File837 Spectrum262215 scans: 27354	839.667	1115.62	950.922	1182.54	717.297	1232.59	1077.18	1586.41
1	Pavir.J40504.1	Pavir.J40504.1	29893	42542	958	958	20	20	64.5	395605	1	1	1	953.52	2857.54	3	2857.54	-0.0028	0	76.86	18	31	1.4e-06	R	LTYTLDEIEGPLEVGSDGTLK	F			File837 Spectrum262245 scans: 27472	764.014	552.16	613.922	483.813	372.892	331.112	555.669	657.661
1	Pavir.J40504.1	Pavir.J40504.1	29893	42542	958	958	20	20	64.5	395616	1	1	1	953.521	2857.54	3	2857.54	-0.0021	0	77.39		31	1.2e-06	R	LTYTLDEIEGPLEVGSDGTLK	F			File837 Spectrum262234 scans: 27406	725.56	1042.04	697.33	763.233	426.074	389.297	919.676	1004.65
1	Pavir.J40504.1	Pavir.J40504.1	29893	42542	958	958	20	20	64.5	395583	1	1	1	953.52	2857.54	3	2857.54	-0.0043	0	60.97	19	31	5.4e-05	R	LTYTLDEIEGPLEVGSDGTLK	F			File837 Spectrum262241 scans: 27445	606.528	554.916	458.223	634.515	304.232	317.482	452.596	635.911
1	Pavir.J40504.1	Pavir.J40504.1	29893	42542	958	958	20	20	64.5	395656	1	1	1	953.521	2857.54	3	2857.54	0.0001	0	66.85	18	31	1.4e-05	R	LTYTLDEIEGPLEVGSDGTLK	F			File838 Spectrum283815 scans: 26595	598.668	1000.92	561.518	734.613	326.38	573.668	657.169	894.783
1	Pavir.J40504.1	Pavir.J40504.1	29893	42542	958	958	20	20	64.5	395624	1	1	1	953.521	2857.54	3	2857.54	-0.0018	0	62.92	20	31	3.5e-05	R	LTYTLDEIEGPLEVGSDGTLK	F			File836 Spectrum240277 scans: 27494	564.618	641.945	509.734	795.149	384.57	459.077	523.902	679.636
1	Pavir.J40504.1	Pavir.J40504.1	29893	42542	958	958	20	20	64.5	395556	1	1	1	953.519	2857.54	3	2857.54	-0.006	0	39.49	16	31	0.0077	R	LTYTLDEIEGPLEVGSDGTLK	F			File837 Spectrum262104 scans: 27218	508.822	547.786	517.465	523.932	369.379	208.128	509.129	756.21
1	Pavir.J40504.1	Pavir.J40504.1	29893	42542	958	958	20	20	64.5	395591	1	1	1	953.52	2857.54	3	2857.54	-0.0036	0	66.36	18	31	1.6e-05	R	LTYTLDEIEGPLEVGSDGTLK	F			File837 Spectrum262248 scans: 27514	476.399	409.423	237.734	256.15	329.191	273.596	546.856	495.768
1	Pavir.J40504.1	Pavir.J40504.1	29893	42542	958	958	20	20	64.5	395595	1	1	1	953.52	2857.54	3	2857.54	-0.0032	0	55.64	18	31	0.00018	R	LTYTLDEIEGPLEVGSDGTLK	F			File837 Spectrum262267 scans: 27862	457.742	303.888	432.955	412.326	246.668	88.849	360.029	467.852
1	Pavir.J40504.1	Pavir.J40504.1	29893	42542	958	958	20	20	64.5	395620	1	1	1	953.521	2857.54	3	2857.54	-0.0019	0	59.4	17	31	7.8e-05	R	LTYTLDEIEGPLEVGSDGTLK	F			File837 Spectrum262296 scans: 28429	402.096	413.236	370.402	478.491	376.334	344.865	328.095	432.648
1	Pavir.J40504.1	Pavir.J40504.1	29893	42542	958	958	20	20	64.5	395623	1	1	1	953.521	2857.54	3	2857.54	-0.0018	0	57.01	16	31	0.00014	R	LTYTLDEIEGPLEVGSDGTLK	F			File837 Spectrum262258 scans: 27709	387.412	406.914	258.198	516.097	283.259	253.859	220.142	359.886
1	Pavir.J40504.1	Pavir.J40504.1	29893	42542	958	958	20	20	64.5	395644	1	1	1	953.521	2857.54	3	2857.54	-0.0008	0	52.96	17	31	0.00034	R	LTYTLDEIEGPLEVGSDGTLK	F			File837 Spectrum262265 scans: 27822	349.301	445.671	112.524	365.443	190.654	105.375	331.778	280.509
1	Pavir.J40504.1	Pavir.J40504.1	29893	42542	958	958	20	20	64.5	395592	1	1	1	953.52	2857.54	3	2857.54	-0.0036	0	52.71	16	31	0.00036	R	LTYTLDEIEGPLEVGSDGTLK	F			File837 Spectrum262297 scans: 28435	290.925	372.387	205.109	364.456	232.155	292.994	355.22	326.252
1	Pavir.J40504.1	Pavir.J40504.1	29893	42542	958	958	20	20	64.5	395579	1	1	1	953.52	2857.54	3	2857.54	-0.0045	0	66.44	18	31	1.5e-05	R	LTYTLDEIEGPLEVGSDGTLK	F			File837 Spectrum262270 scans: 27872	287.991	342.223	210.853	352.66	185.162	242.103	271.865	372.779
1	Pavir.J40504.1	Pavir.J40504.1	29893	42542	958	958	20	20	64.5	395608	1	1	1	953.52	2857.54	3	2857.54	-0.0025	0	51.87		31	0.00044	R	LTYTLDEIEGPLEVGSDGTLK	F			File837 Spectrum262291 scans: 28404	267.223	265.722	271.246	405.091	321.255	198.304	395.165	375.022
1	Pavir.J40504.1	Pavir.J40504.1	29893	42542	958	958	20	20	64.5	395600	1	1	1	953.52	2857.54	3	2857.54	-0.0031	0	67.38	19	31	1.2e-05	R	LTYTLDEIEGPLEVGSDGTLK	F			File837 Spectrum262295 scans: 28425	232.089	379.19	456.821	427.801	231.142	245.375	420.97	335.782
2	Pavir.Eb03662.1	Pavir.Eb03662.1	29298	42496	937	937	20	20	64.5	446033	1	1	1	917.253	3664.98	4	3664.99	-0.0024	1	40.98		30	0.0048	R	LTYTLDEIEGPLEVGSDGALKFEEK	D			File837 Spectrum260348 scans: 25333	21203.2	14307.8	22043.1	15689.7	14317.5	15234.1	21368.8	18465.2
2	Pavir.Eb03662.1	Pavir.Eb03662.1	29298	42496	937	937	20	20	64.5	391674	1	1	1	943.514	2827.52	3	2827.53	-0.0121	0	58.56		31	9.2e-05	R	LTYTLDEIEGPLEVGSDGALK	F			File837 Spectrum261799 scans: 26893	18814.8	12427.5	14864.9	12412.1	13085.2	11833.8	13609.8	16054.7
2	Pavir.Eb03662.1	Pavir.Eb03662.1	29298	42496	937	937	20	20	64.5	391716	1	1	1	943.516	2827.53	3	2827.53	-0.0062	0	57.74	19	31	0.00011	R	LTYTLDEIEGPLEVGSDGALK	F			File837 Spectrum261828 scans: 26924	16949.4	15987.5	17373.7	17543.5	10811	13644.3	14881.4	18173.7
2	Pavir.Eb03662.1	Pavir.Eb03662.1	29298	42496	937	937	20	20	64.5	446043	1	1	1	917.254	3664.99	4	3664.99	0.002	1	69.23	17	30	7.1e-06	R	LTYTLDEIEGPLEVGSDGALKFEEK	D			File841 Spectrum352389 scans: 27537	16287	9667.99	17794.2	14065.4	13255.9	11939.6	15321.4	11749.6
2	Pavir.Eb03662.1	Pavir.Eb03662.1	29298	42496	937	937	20	20	64.5	391781	1	1	1	943.518	2827.53	3	2827.53	0.0002	0	76.11	18	31	1.6e-06	R	LTYTLDEIEGPLEVGSDGALK	F			File843 Spectrum398921 scans: 27478	16105.5	28314.9	18275.2	21951.9	11008.1	8114.91	12348.6	20528.1
2	Pavir.Eb03662.1	Pavir.Eb03662.1	29298	42496	937	937	20	20	64.5	391680	1	1	1	943.514	2827.52	3	2827.53	-0.0108	0	64.14	18	31	2.6e-05	R	LTYTLDEIEGPLEVGSDGALK	F			File840 Spectrum328433 scans: 26908	14982.8	17629.9	16971	22556	10004.6	11449.7	20269.1	22097.7
2	Pavir.Eb03662.1	Pavir.Eb03662.1	29298	42496	937	937	20	20	64.5	446008	1	1	1	1222.66	3664.97	3	3664.99	-0.0174	1	69.23		31	7.6e-06	R	LTYTLDEIEGPLEVGSDGALKFEEK	D			File840 Spectrum329232 scans: 27760	14468.5	9562.21	15075.1	13940	11139.7	14047.1	17763.3	12366.2
2	Pavir.Eb03662.1	Pavir.Eb03662.1	29298	42496	937	937	20	20	64.5	391693	1	1	1	943.515	2827.52	3	2827.53	-0.0082	0	58.55	16	31	9.1e-05	R	LTYTLDEIEGPLEVGSDGALK	F			File839 Spectrum302506 scans: 23150	12720.4	12664.8	11147.2	12207.4	8750.45	11124.9	11099.2	11559
2	Pavir.Eb03662.1	Pavir.Eb03662.1	29298	42496	937	937	20	20	64.5	391637	1	1	1	943.513	2827.52	3	2827.53	-0.0146	0	65.56		31	1.9e-05	R	LTYTLDEIEGPLEVGSDGALK	F			File840 Spectrum329231 scans: 27759	12710.9	12765.2	11791.5	8978.3	7725.29	7497.13	11517.8	11024.2
2	Pavir.Eb03662.1	Pavir.Eb03662.1	29298	42496	937	937	20	20	64.5	391724	1	1	1	707.889	2827.53	4	2827.53	-0.0058	0	38.93	20	31	0.0084	R	LTYTLDEIEGPLEVGSDGALK	F			File840 Spectrum322333 scans: 20401	11695.6	8602.36	13046.9	13833	7623.38	7245.71	12229.7	11390.8
2	Pavir.Eb03662.1	Pavir.Eb03662.1	29298	42496	937	937	20	20	64.5	391787	1	1	1	943.518	2827.53	3	2827.53	0.0013	0	62.65		31	3.5e-05	R	LTYTLDEIEGPLEVGSDGALK	F			File837 Spectrum257385 scans: 22172	11127.8	12238.2	9563.95	11356	9298.53	9901.1	8488.12	10116.1
2	Pavir.Eb03662.1	Pavir.Eb03662.1	29298	42496	937	937	20	20	64.5	446014	1	1	1	1222.67	3664.97	3	3664.99	-0.0119	1	55.6		30	0.00017	R	LTYTLDEIEGPLEVGSDGALKFEEK	D			File840 Spectrum329275 scans: 27806	10705	6301.65	11049.1	10963.1	8984.25	8012.73	11184	9048.73
2	Pavir.Eb03662.1	Pavir.Eb03662.1	29298	42496	937	937	20	20	64.5	446020	1	1	1	1222.67	3664.98	3	3664.99	-0.0097	1	59.81		30	6.5e-05	R	LTYTLDEIEGPLEVGSDGALKFEEK	D			File840 Spectrum329306 scans: 27839	10462.1	7826.7	10866.6	8346.96	8074.35	6467.34	11192.4	8686.6
2	Pavir.Eb03662.1	Pavir.Eb03662.1	29298	42496	937	937	20	20	64.5	391681	1	1	1	943.514	2827.52	3	2827.53	-0.0106	0	44.37		31	0.0025	R	LTYTLDEIEGPLEVGSDGALK	F			File840 Spectrum322378 scans: 20449	10401	10279.2	9340	13505.3	8385.24	7335.9	10017.5	10637.4
2	Pavir.Eb03662.1	Pavir.Eb03662.1	29298	42496	937	937	20	20	64.5	391752	1	1	1	707.889	2827.53	4	2827.53	-0.0034	0	32.61	16	31	0.036	R	LTYTLDEIEGPLEVGSDGALK	F			File841 Spectrum345909 scans: 20625	10397.7	8883.61	6729.73	10927.4	5722.74	7591.19	8131.01	8876.07
2	Pavir.Eb03662.1	Pavir.Eb03662.1	29298	42496	937	937	20	20	64.5	391714	1	1	1	943.516	2827.53	3	2827.53	-0.0062	0	56.32	16	31	0.00015	R	LTYTLDEIEGPLEVGSDGALK	F			File837 Spectrum261904 scans: 27005	10377.5	14025.9	9471.14	13126.7	6808.84	6525.05	12470.5	14754.2
2	Pavir.Eb03662.1	Pavir.Eb03662.1	29298	42496	937	937	20	20	64.5	391749	1	1	1	943.516	2827.53	3	2827.53	-0.0038	0	55.84		31	0.00017	R	LTYTLDEIEGPLEVGSDGALK	F			File837 Spectrum258613 scans: 23482	10356.7	11622.4	9914.53	8226.67	5963.53	4566.92	7336.44	6688.73
2	Pavir.Eb03662.1	Pavir.Eb03662.1	29298	42496	937	937	20	20	64.5	391740	1	1	1	943.516	2827.53	3	2827.53	-0.0045	0	36.97		31	0.013	R	LTYTLDEIEGPLEVGSDGALK	F			File840 Spectrum322438 scans: 20513	10329.2	12371.7	11850.8	13989.4	10807.1	8505.53	12710.3	11525.3
2	Pavir.Eb03662.1	Pavir.Eb03662.1	29298	42496	937	937	20	20	64.5	391737	1	1	1	943.516	2827.53	3	2827.53	-0.0049	0	60.4	20	31	5.9e-05	R	LTYTLDEIEGPLEVGSDGALK	F			File844 Spectrum422145 scans: 27275	10226.4	41591	17949.1	25917.6	5417.97	8485.53	9980.67	22747.9
2	Pavir.Eb03662.1	Pavir.Eb03662.1	29298	42496	937	937	20	20	64.5	446019	1	1	1	917.251	3664.98	4	3664.99	-0.0098	1	65.03		30	1.9e-05	R	LTYTLDEIEGPLEVGSDGALKFEEK	D			File837 Spectrum257958 scans: 22783	8936.56	6569.81	8473.29	6718.38	6288.61	7281.87	7725.98	5087.74
2	Pavir.Eb03662.1	Pavir.Eb03662.1	29298	42496	937	937	20	20	64.5	391750	1	1	1	943.517	2827.53	3	2827.53	-0.0035	0	70.69	21	31	5.6e-06	R	LTYTLDEIEGPLEVGSDGALK	F			File844 Spectrum422070 scans: 27195	8782.01	28829.8	16959	26261.6	5956.81	8882.56	7628.91	14216.1
2	Pavir.Eb03662.1	Pavir.Eb03662.1	29298	42496	937	937	20	20	64.5	391723	1	1	1	943.516	2827.53	3	2827.53	-0.0058	0	60.52	18	31	5.8e-05	R	LTYTLDEIEGPLEVGSDGALK	F			File837 Spectrum257467 scans: 22260	8486.02	7588.67	7378.58	10785.9	7240.92	5346.75	6474.78	9501.67
2	Pavir.Eb03662.1	Pavir.Eb03662.1	29298	42496	937	937	20	20	64.5	391733	1	1	1	943.516	2827.53	3	2827.53	-0.0053	0	67.38	19	31	1.2e-05	R	LTYTLDEIEGPLEVGSDGALK	F			File842 Spectrum375223 scans: 27362	8333.35	13149.1	8591.82	12323.1	5009.51	7667.53	9607.83	10293.2
2	Pavir.Eb03662.1	Pavir.Eb03662.1	29298	42496	937	937	20	20	64.5	391662	1	1	1	943.514	2827.52	3	2827.53	-0.0128	0	66.91	22	31	1.3e-05	R	LTYTLDEIEGPLEVGSDGALK	F			File840 Spectrum328374 scans: 26845	7960.9	9229.3	8472.04	10517.6	6093.71	6377.77	10415	13285.5
2	Pavir.Eb03662.1	Pavir.Eb03662.1	29298	42496	937	937	20	20	64.5	391671	1	1	1	943.514	2827.52	3	2827.53	-0.0123	0	63.56		31	2.9e-05	R	LTYTLDEIEGPLEVGSDGALK	F			File840 Spectrum328497 scans: 26976	7619.36	6729.5	7485.79	8179.45	5580.84	3922.61	6853.97	8786.38
2	Pavir.Eb03662.1	Pavir.Eb03662.1	29298	42496	937	937	20	20	64.5	391765	1	1	1	707.89	2827.53	4	2827.53	-0.0016	0	37.58	19	31	0.011	R	LTYTLDEIEGPLEVGSDGALK	F			File841 Spectrum345940 scans: 20658	7267.89	7762.44	7800.43	6557.51	4993.42	4362.8	6195.13	7531.82
2	Pavir.Eb03662.1	Pavir.Eb03662.1	29298	42496	937	937	20	20	64.5	446041	1	1	1	917.254	3664.99	4	3664.99	0.0015	1	49.88		30	0.00061	R	LTYTLDEIEGPLEVGSDGALKFEEK	D			File841 Spectrum352496 scans: 27651	7064.16	4076.6	8278.8	6319.08	6345.34	5289.71	7048.79	5419.6
2	Pavir.Eb03662.1	Pavir.Eb03662.1	29298	42496	937	937	20	20	64.5	446024	1	1	1	917.252	3664.98	4	3664.99	-0.0068	1	65.61		30	1.7e-05	R	LTYTLDEIEGPLEVGSDGALKFEEK	D			File837 Spectrum260296 scans: 25277	6956.22	5231.26	6633.52	5339.25	5395.6	4587.78	7875.94	6342.29
2	Pavir.Eb03662.1	Pavir.Eb03662.1	29298	42496	937	937	20	20	64.5	391789	1	1	1	943.519	2827.53	3	2827.53	0.0022	0	70.76	19	31	5.3e-06	R	LTYTLDEIEGPLEVGSDGALK	F			File843 Spectrum398967 scans: 27527	6799.66	17468.7	11359.6	13990.3	6574.17	4989.48	8208.18	13207
2	Pavir.Eb03662.1	Pavir.Eb03662.1	29298	42496	937	937	20	20	64.5	391776	1	1	1	943.518	2827.53	3	2827.53	-0.0003	0	64.56	19	31	2.3e-05	R	LTYTLDEIEGPLEVGSDGALK	F			File845 Spectrum446315 scans: 27755	6754.08	8708.59	5322.12	8017.31	3877.02	3921.63	5687.39	5224.52
2	Pavir.Eb03662.1	Pavir.Eb03662.1	29298	42496	937	937	20	20	64.5	391778	1	1	1	943.518	2827.53	3	2827.53	-0.0002	0	51.91	16	31	0.00042	R	LTYTLDEIEGPLEVGSDGALK	F			File839 Spectrum303700 scans: 24423	6209.56	6608.48	5222.28	4329.37	2133.31	1829.42	3258.66	3140.32
2	Pavir.Eb03662.1	Pavir.Eb03662.1	29298	42496	937	937	20	20	64.5	391756	1	1	1	943.517	2827.53	3	2827.53	-0.0029	0	64.49	17	31	2.3e-05	R	LTYTLDEIEGPLEVGSDGALK	F			File845 Spectrum446269 scans: 27706	6012.43	7058.82	5096.9	5729.65	2801.75	3955.7	5224.49	5780.6
2	Pavir.Eb03662.1	Pavir.Eb03662.1	29298	42496	937	937	20	20	64.5	391707	1	1	1	943.516	2827.53	3	2827.53	-0.0066	0	64.38	17	31	2.4e-05	R	LTYTLDEIEGPLEVGSDGALK	F			File837 Spectrum257489 scans: 22283	6001.62	5379.1	5295.79	7087.9	3119.96	3738.78	5932.03	6821.02
2	Pavir.Eb03662.1	Pavir.Eb03662.1	29298	42496	937	937	20	20	64.5	391793	1	1	1	943.519	2827.54	3	2827.53	0.0051	0	37.45	17	30	0.011	R	LTYTLDEIEGPLEVGSDGALK	F			File841 Spectrum345829 scans: 20539	5926.13	8658.54	7766.67	8946.5	5524.59	5645.96	7825.93	8571.12
2	Pavir.Eb03662.1	Pavir.Eb03662.1	29298	42496	937	937	20	20	64.5	391766	1	1	1	943.517	2827.53	3	2827.53	-0.0016	0	64.84		31	2.1e-05	R	LTYTLDEIEGPLEVGSDGALK	F			File845 Spectrum446362 scans: 27805	5697.46	6564.16	5476.43	6302.98	4048.03	3559.1	5953.83	7892.83
2	Pavir.Eb03662.1	Pavir.Eb03662.1	29298	42496	937	937	20	20	64.5	391713	1	1	1	943.516	2827.53	3	2827.53	-0.0062	0	60.77	18	31	5.5e-05	R	LTYTLDEIEGPLEVGSDGALK	F			File845 Spectrum446379 scans: 27823	5643.76	5124.84	4420.43	6247.65	3194.48	2457.95	5264.23	6454.41
2	Pavir.Eb03662.1	Pavir.Eb03662.1	29298	42496	937	937	20	20	64.5	391774	1	1	1	943.518	2827.53	3	2827.53	-0.0007	0	58.64	16	31	8.9e-05	R	LTYTLDEIEGPLEVGSDGALK	F			File839 Spectrum302447 scans: 23087	5544.35	7209.18	6041.63	7338.94	4167.85	6068.02	7007.78	6891.65
2	Pavir.Eb03662.1	Pavir.Eb03662.1	29298	42496	937	937	20	20	64.5	391772	1	1	1	943.518	2827.53	3	2827.53	-0.0011	0	81.03	18	31	5.1e-07	R	LTYTLDEIEGPLEVGSDGALK	F			File845 Spectrum446397 scans: 27842	5483.12	7602.09	5387.01	7991.78	3692.01	3197.27	5102.03	5902.81
2	Pavir.Eb03662.1	Pavir.Eb03662.1	29298	42496	937	937	20	20	64.5	391797	1	1	1	943.52	2827.54	3	2827.53	0.0063	0	62.88	21	30	3.2e-05	R	LTYTLDEIEGPLEVGSDGALK	F			File839 Spectrum303723 scans: 24448	5270.85	4880.45	3936.43	3499.93	1419.09	2457.12	2273.89	2219.86
2	Pavir.Eb03662.1	Pavir.Eb03662.1	29298	42496	937	937	20	20	64.5	446038	1	1	1	917.254	3664.99	4	3664.99	-0.0005	1	53.26		30	0.00028	R	LTYTLDEIEGPLEVGSDGALKFEEK	D			File841 Spectrum352463 scans: 27616	5109.38	3528.89	6852.72	3844.02	3706.98	5245.85	5934.31	3776
2	Pavir.Eb03662.1	Pavir.Eb03662.1	29298	42496	937	937	20	20	64.5	446013	1	1	1	917.25	3664.97	4	3664.99	-0.0124	1	42.11		30	0.0038	R	LTYTLDEIEGPLEVGSDGALKFEEK	D			File844 Spectrum422621 scans: 27782	5106.88	9509.18	5606.84	5210.22	3866.14	4029.08	4655.64	4355.63
2	Pavir.Eb03662.1	Pavir.Eb03662.1	29298	42496	937	937	20	20	64.5	446009	1	1	1	1222.66	3664.97	3	3664.99	-0.0174	1	47		31	0.0013	R	LTYTLDEIEGPLEVGSDGALKFEEK	D			File837 Spectrum261913 scans: 27014	4953.02	3092	3833.11	3981.02	3662.48	3322.26	5006.31	3957.63
2	Pavir.Eb03662.1	Pavir.Eb03662.1	29298	42496	937	937	20	20	64.5	446011	1	1	1	917.25	3664.97	4	3664.99	-0.0137	1	50.13		30	0.00061	R	LTYTLDEIEGPLEVGSDGALKFEEK	D			File840 Spectrum329020 scans: 27534	4795.42	4046.47	6423.91	5159.21	4848.39	3801.35	6020.38	4306.3
2	Pavir.Eb03662.1	Pavir.Eb03662.1	29298	42496	937	937	20	20	64.5	391760	1	1	1	943.517	2827.53	3	2827.53	-0.0024	0	64.75	20	31	2.2e-05	R	LTYTLDEIEGPLEVGSDGALK	F			File839 Spectrum302608 scans: 23258	4339.28	3690.41	4662.56	5443.2	3072.18	2742.75	3849	4703.19
2	Pavir.Eb03662.1	Pavir.Eb03662.1	29298	42496	937	937	20	20	64.5	446012	1	1	1	1222.66	3664.97	3	3664.99	-0.013	1	47.82		30	0.001	R	LTYTLDEIEGPLEVGSDGALKFEEK	D			File840 Spectrum329117 scans: 27637	4308.12	2689.94	4423.03	4858.41	3794.14	3302.21	4304.68	3078.65
2	Pavir.Eb03662.1	Pavir.Eb03662.1	29298	42496	937	937	20	20	64.5	391735	1	1	1	943.516	2827.53	3	2827.53	-0.0049	0	74.21	21	31	2.5e-06	R	LTYTLDEIEGPLEVGSDGALK	F			File844 Spectrum422251 scans: 27388	4298.75	19571.2	9908.13	14585.8	4563.76	7463.96	4467.76	9945.64
2	Pavir.Eb03662.1	Pavir.Eb03662.1	29298	42496	937	937	20	20	64.5	446029	1	1	1	917.253	3664.98	4	3664.99	-0.0042	1	47.8		30	0.001	R	LTYTLDEIEGPLEVGSDGALKFEEK	D			File843 Spectrum399001 scans: 27563	3988.11	12234.8	7025.96	9937.91	3857.54	4606.67	3875.16	7794.17
2	Pavir.Eb03662.1	Pavir.Eb03662.1	29298	42496	937	937	20	20	64.5	391779	1	1	1	943.518	2827.53	3	2827.53	0	0	67.03		31	1.3e-05	R	LTYTLDEIEGPLEVGSDGALK	F			File845 Spectrum446333 scans: 27774	3734.81	4398.08	3186.19	4342.52	2926.14	4359.94	4945.47	4760.36
2	Pavir.Eb03662.1	Pavir.Eb03662.1	29298	42496	937	937	20	20	64.5	391784	1	1	1	943.518	2827.53	3	2827.53	0.0008	0	63.26	20	31	3.1e-05	R	LTYTLDEIEGPLEVGSDGALK	F			File845 Spectrum446435 scans: 27883	3599.21	5115.89	3832.89	3853.2	3838.67	2786.36	4249.68	5054.1
2	Pavir.Eb03662.1	Pavir.Eb03662.1	29298	42496	937	937	20	20	64.5	446045	1	1	1	917.255	3664.99	4	3664.99	0.0039	1	37.94	15	30	0.0092	R	LTYTLDEIEGPLEVGSDGALKFEEK	D			File837 Spectrum261434 scans: 26503	3596.01	6064.5	6781.56	4540.76	4470.69	3019.92	5252.72	6187.58
2	Pavir.Eb03662.1	Pavir.Eb03662.1	29298	42496	937	937	20	20	64.5	446016	1	1	1	1222.67	3664.97	3	3664.99	-0.0115	1	64.17		30	2.4e-05	R	LTYTLDEIEGPLEVGSDGALKFEEK	D			File837 Spectrum260418 scans: 25407	3529.7	1793.02	3869.39	3930.82	3218.93	2644.83	4002.53	3306.24
2	Pavir.Eb03662.1	Pavir.Eb03662.1	29298	42496	937	937	20	20	64.5	391767	1	1	1	943.517	2827.53	3	2827.53	-0.0015	0	49.44	21	31	0.00074	R	LTYTLDEIEGPLEVGSDGALK	F			File841 Spectrum345885 scans: 20599	3365.18	4368.66	3904.3	3033.19	3116.41	3113.77	3518.59	4491.29
2	Pavir.Eb03662.1	Pavir.Eb03662.1	29298	42496	937	937	20	20	64.5	391794	1	1	1	943.52	2827.54	3	2827.53	0.0053	0	58.47	17	30	8.9e-05	R	LTYTLDEIEGPLEVGSDGALK	F			File841 Spectrum351576 scans: 26669	3165.06	3892.33	2605.95	3221.85	1690.05	1540.52	2824.75	3271.49
2	Pavir.Eb03662.1	Pavir.Eb03662.1	29298	42496	937	937	20	20	64.5	391732	1	1	1	943.516	2827.53	3	2827.53	-0.0053	0	65.86	17	31	1.7e-05	R	LTYTLDEIEGPLEVGSDGALK	F			File844 Spectrum421979 scans: 27098	3134.58	14599.5	4771.19	11443.7	2040.09	4135.29	3655.76	6273.9
2	Pavir.Eb03662.1	Pavir.Eb03662.1	29298	42496	937	937	20	20	64.5	391795	1	1	1	943.52	2827.54	3	2827.53	0.0055	0	68.87	18	30	8.2e-06	R	LTYTLDEIEGPLEVGSDGALK	F			File845 Spectrum446460 scans: 27909	3041.88	3397.82	3088.86	2796.66	1516.27	2237.94	2642.6	2890.3
2	Pavir.Eb03662.1	Pavir.Eb03662.1	29298	42496	937	937	20	20	64.5	391727	1	1	1	943.516	2827.53	3	2827.53	-0.0055	0	74.86	22	31	2.1e-06	R	LTYTLDEIEGPLEVGSDGALK	F			File844 Spectrum422296 scans: 27436	2825.96	8589.19	4419.49	5861.55	1625.96	1987.03	2506.53	4641.52
2	Pavir.Eb03662.1	Pavir.Eb03662.1	29298	42496	937	937	20	20	64.5	446044	1	1	1	917.254	3664.99	4	3664.99	0.0024	1	53.61		30	0.00026	R	LTYTLDEIEGPLEVGSDGALKFEEK	D			File839 Spectrum303087 scans: 23769	2823.31	3083.4	3040.9	2736.01	2100.68	2062.53	2990.9	2203.04
2	Pavir.Eb03662.1	Pavir.Eb03662.1	29298	42496	937	937	20	20	64.5	391763	1	1	1	943.517	2827.53	3	2827.53	-0.002	0	63.57		31	2.8e-05	R	LTYTLDEIEGPLEVGSDGALK	F			File842 Spectrum375170 scans: 27305	2793.64	4309.61	2662.61	3361.45	1965.3	1615.07	2683.65	3157.13
2	Pavir.Eb03662.1	Pavir.Eb03662.1	29298	42496	937	937	20	20	64.5	391736	1	1	1	943.516	2827.53	3	2827.53	-0.0049	0	58.51	19	31	9.1e-05	R	LTYTLDEIEGPLEVGSDGALK	F			File839 Spectrum306430 scans: 27336	2650.75	3924.49	2145.1	3129.11	1427.55	1650.19	2675.89	3685.19
2	Pavir.Eb03662.1	Pavir.Eb03662.1	29298	42496	937	937	20	20	64.5	446034	1	1	1	917.253	3664.98	4	3664.99	-0.002	1	50		30	0.0006	R	LTYTLDEIEGPLEVGSDGALKFEEK	D			File841 Spectrum352288 scans: 27429	2623.09	2504.4	3260.3	2703.07	2788.31	2806.03	3716.11	2291.61
2	Pavir.Eb03662.1	Pavir.Eb03662.1	29298	42496	937	937	20	20	64.5	391788	1	1	1	943.518	2827.53	3	2827.53	0.0015	0	64.46		31	2.3e-05	R	LTYTLDEIEGPLEVGSDGALK	F			File843 Spectrum399024 scans: 27587	2502.65	4031.75	2946.64	4045.52	1930.67	1723.28	1789.4	3263.64
2	Pavir.Eb03662.1	Pavir.Eb03662.1	29298	42496	937	937	20	20	64.5	391673	1	1	1	943.514	2827.52	3	2827.53	-0.0121	0	55.44	19	31	0.00019	R	LTYTLDEIEGPLEVGSDGALK	F			File840 Spectrum329262 scans: 27792	2406.35	2156.62	2138.55	2398.45	1779.54	2265.42	2650.94	2270.31
2	Pavir.Eb03662.1	Pavir.Eb03662.1	29298	42496	937	937	20	20	64.5	446049	1	1	1	917.258	3665	4	3664.99	0.0164	1	37.43		30	0.0091	R	LTYTLDEIEGPLEVGSDGALKFEEK	D			File843 Spectrum398963 scans: 27522	2175.01	7720.25	4683.49	6129.95	2884.23	2139.33	2367.06	3827.57	emPAI	55.96	Quantitation summary for protein	113/115	0.791	87	[1.077]		114/115	0.58	86	1.077
2	Pavir.Eb03662.1	Pavir.Eb03662.1	29298	42496	937	937	20	20	64.5	446017	1	1	1	917.251	3664.98	4	3664.99	-0.01	1	48.5		30	0.00088	R	LTYTLDEIEGPLEVGSDGALKFEEK	D			File839 Spectrum306485 scans: 27394	2069.17	2648.46	2533.23	2894.01	1918.19	2180.63	3050.91	2345.43
2	Pavir.Eb03662.1	Pavir.Eb03662.1	29298	42496	937	937	20	20	64.5	391761	1	1	1	943.517	2827.53	3	2827.53	-0.0022	0	64.63	17	31	2.2e-05	R	LTYTLDEIEGPLEVGSDGALK	F			File845 Spectrum446291 scans: 27729	2042.99	2601.03	2041.26	3071.01	2023.33	2890.78	2995.12	3379.12
2	Pavir.Eb03662.1	Pavir.Eb03662.1	29298	42496	937	937	20	20	64.5	391715	1	1	1	943.516	2827.53	3	2827.53	-0.0062	0	61.6	17	31	4.5e-05	R	LTYTLDEIEGPLEVGSDGALK	F			File844 Spectrum421944 scans: 27060	2040.63	9786.2	5178.34	7057.78	2066.42	1938.32	3097.06	3657.16
2	Pavir.Eb03662.1	Pavir.Eb03662.1	29298	42496	937	937	20	20	64.5	391694	1	1	1	943.515	2827.52	3	2827.53	-0.008	0	68.85	19	31	8.5e-06	R	LTYTLDEIEGPLEVGSDGALK	F			File838 Spectrum284031 scans: 26838	1829.7	3124.8	1942.63	2317.42	1057.69	1429.28	2106.37	2210.89
2	Pavir.Eb03662.1	Pavir.Eb03662.1	29298	42496	937	937	20	20	64.5	446006	1	1	1	917.249	3664.97	4	3664.99	-0.0195	1	51.08		31	0.0005	R	LTYTLDEIEGPLEVGSDGALKFEEK	D			File837 Spectrum262108 scans: 27222	1748.64	1243.79	1821.85	1612.58	1434.31	1266.15	1927.21	1918.27
2	Pavir.Eb03662.1	Pavir.Eb03662.1	29298	42496	937	937	20	20	64.5	391728	1	1	1	943.516	2827.53	3	2827.53	-0.0055	0	74.06		31	2.6e-06	R	LTYTLDEIEGPLEVGSDGALK	F			File837 Spectrum262109 scans: 27223	1571.82	2371.57	1612.43	2124.86	1202.56	1207.88	1901.42	2220.98
2	Pavir.Eb03662.1	Pavir.Eb03662.1	29298	42496	937	937	20	20	64.5	446042	1	1	1	917.254	3664.99	4	3664.99	0.0017	1	52.79		30	0.00031	R	LTYTLDEIEGPLEVGSDGALKFEEK	D			File837 Spectrum262146 scans: 27263	1555.87	1034.44	1485.05	1161.88	1049.51	1325.49	1545.66	1104.55
2	Pavir.Eb03662.1	Pavir.Eb03662.1	29298	42496	937	937	20	20	64.5	391777	1	1	1	943.518	2827.53	3	2827.53	-0.0002	0	40.01	17	31	0.0065	R	LTYTLDEIEGPLEVGSDGALK	F			File843 Spectrum398735 scans: 27279	1386.07	2846.03	1853.35	2466.39	2195.93	2214.04	2240.85	1932.85
2	Pavir.Eb03662.1	Pavir.Eb03662.1	29298	42496	937	937	20	20	64.5	391717	1	1	1	943.516	2827.53	3	2827.53	-0.0062	0	59.39	17	31	7.6e-05	R	LTYTLDEIEGPLEVGSDGALK	F			File838 Spectrum283996 scans: 26796	1347.97	2847.51	1494.76	1922.83	1029.76	963.279	1804.52	2117.84
2	Pavir.Eb03662.1	Pavir.Eb03662.1	29298	42496	937	937	20	20	64.5	391625	1	1	1	943.513	2827.52	3	2827.53	-0.0152	0	54.62		31	0.00023	R	LTYTLDEIEGPLEVGSDGALK	F			File839 Spectrum306263 scans: 27157	1138.21	2005.62	1343.04	1603.34	802.466	821.843	1242.71	1407.03
2	Pavir.Eb03662.1	Pavir.Eb03662.1	29298	42496	937	937	20	20	64.5	446040	1	1	1	917.254	3664.99	4	3664.99	0.0002	1	51.26		30	0.00045	R	LTYTLDEIEGPLEVGSDGALKFEEK	D			File837 Spectrum261391 scans: 26457	1091.6	1831.17	1361.77	882.753	1418.94	916.353	1549.8	2310.67
2	Pavir.Eb03662.1	Pavir.Eb03662.1	29298	42496	937	937	20	20	64.5	391697	1	1	1	943.515	2827.52	3	2827.53	-0.0078	0	68.05	17	31	1e-05	R	LTYTLDEIEGPLEVGSDGALK	F			File844 Spectrum421959 scans: 27076	947.403	7162.64	3344.91	4724.27	1527.85	1134.21	2026.92	3250.19
2	Pavir.Eb03662.1	Pavir.Eb03662.1	29298	42496	937	937	20	20	64.5	391690	1	1	1	943.515	2827.52	3	2827.53	-0.0088	0	59.77	17	31	6.8e-05	R	LTYTLDEIEGPLEVGSDGALK	F			File837 Spectrum262206 scans: 27342	886.933	859.897	914.022	1038.37	673.662	735.353	990.085	964.293
2	Pavir.Eb03662.1	Pavir.Eb03662.1	29298	42496	937	937	20	20	64.5	391782	1	1	1	943.518	2827.53	3	2827.53	0.0006	0	57.95	21	31	0.0001	R	LTYTLDEIEGPLEVGSDGALK	F			File839 Spectrum306037 scans: 26916	812.757	2815.52	1679.19	1639.16	1409.21	836.852	1203.71	3557.38
2	Pavir.Eb03662.1	Pavir.Eb03662.1	29298	42496	937	937	20	20	64.5	391739	1	1	1	943.516	2827.53	3	2827.53	-0.0045	0	66.3	17	31	1.5e-05	R	LTYTLDEIEGPLEVGSDGALK	F			File837 Spectrum262229 scans: 27386	712.252	686.596	681.528	752.592	451.189	524.457	724.283	1112.73
2	Pavir.Eb03662.1	Pavir.Eb03662.1	29298	42496	937	937	20	20	64.5	391755	1	1	1	943.517	2827.53	3	2827.53	-0.0031	0	58.56	17	31	9.1e-05	R	LTYTLDEIEGPLEVGSDGALK	F			File838 Spectrum284076 scans: 26891	651.917	1006.68	727.487	943.25	374.831	380.031	637.397	797.355
2	Pavir.Eb03662.1	Pavir.Eb03662.1	29298	42496	937	937	20	20	64.5	391701	1	1	1	943.515	2827.52	3	2827.53	-0.0069	0	75.54	19	31	1.8e-06	R	LTYTLDEIEGPLEVGSDGALK	F			File837 Spectrum262238 scans: 27426	557.347	430.392	572.678	504.526	395.807	349.878	528.237	442.178
2	Pavir.Eb03662.1	Pavir.Eb03662.1	29298	42496	937	937	20	20	64.5	446000	1	1	1	917.248	3664.96	4	3664.99	-0.0227	1	50.93		31	0.00054	R	LTYTLDEIEGPLEVGSDGALKFEEK	D			File840 Spectrum329923 scans: 29464	536.885	470.976	621.598	516.295	520.224	448.356	693.015	428.836
2	Pavir.Eb03662.1	Pavir.Eb03662.1	29298	42496	937	937	20	20	64.5	391722	1	1	1	943.516	2827.53	3	2827.53	-0.0058	0	48.59		31	0.0009	R	LTYTLDEIEGPLEVGSDGALK	F			File837 Spectrum262171 scans: 27290	504.551	634.437	441.768	702.069	460.882	393.213	620.478	589.496
2	Pavir.Eb03662.1	Pavir.Eb03662.1	29298	42496	937	937	20	20	64.5	391700	1	1	1	943.515	2827.52	3	2827.53	-0.0073	0	72.76	19	31	3.5e-06	R	LTYTLDEIEGPLEVGSDGALK	F			File837 Spectrum262239 scans: 27432	498.572	657.715	383.233	565.183	418.515	236.642	558.371	400.696
2	Pavir.Eb03662.1	Pavir.Eb03662.1	29298	42496	937	937	20	20	64.5	391748	1	1	1	943.516	2827.53	3	2827.53	-0.0038	0	42.59	18	31	0.0036	R	LTYTLDEIEGPLEVGSDGALK	F			File838 Spectrum283954 scans: 26748	446.677	669.814	378.732	643.359	229.858	254.526	389.174	489.378
2	Pavir.Eb03662.1	Pavir.Eb03662.1	29298	42496	937	937	20	20	64.5	391702	1	1	1	943.516	2827.52	3	2827.53	-0.0068	0	54.67	18	31	0.00022	R	LTYTLDEIEGPLEVGSDGALK	F			File837 Spectrum262180 scans: 27307	404.749	522.353	344.349	336.312	271.909	212.771	423.249	381.973
2	Pavir.Eb03662.1	Pavir.Eb03662.1	29298	42496	937	937	20	20	64.5	391731	1	1	1	943.516	2827.53	3	2827.53	-0.0053	0	57.1	17	31	0.00013	R	LTYTLDEIEGPLEVGSDGALK	F			File837 Spectrum262244 scans: 27470	308.557	450.112	451.18	454.865	310.555	174.059	483.321	540.502
3	Pavir.J02207.1	Pavir.J02207.1	17800	107806	702	702	38	38	56.2	390051	1	1	1	937.844	2810.51	3	2810.52	-0.005	0	68.78	21	31	8.6e-06	K	VLNEGDWLSLNGSTGEVILGK	Q	2 Deamidated (NQ)	0.001000000010000000000.0	File842 Spectrum373314 scans: 25326	28841.6	22100.6	40623.5	21965.8	24142.5	13434.5	16443.7	21223.2
3	Pavir.J02207.1	Pavir.J02207.1	17800	107806	702	702	38	38	56.2	389968	1	1	1	937.519	2809.54	3	2809.53	0.0028	0	80.56		31	5.6e-07	K	VLNEGDWLSLNGSTGEVILGK	Q	Deamidated (NQ)	0.000000000010000000000.0	File843 Spectrum396776 scans: 25190	26189.2	19342.5	49375.2	31913.6	35213.6	14322.5	18610.6	27602.5
3	Pavir.J02207.1	Pavir.J02207.1	17800	107806	702	702	38	38	56.2	389957	1	1	1	937.517	2809.53	3	2809.53	-0.0021	0	56.4	17	31	0.00015	K	VLNEGDWLSLNGSTGEVILGK	Q	Deamidated (NQ)	0.000000000010000000000.0	File844 Spectrum419942 scans: 24910	25332.5	12204.6	36938.4	23673.2	23696.3	11287	15275.4	15763.2
3	Pavir.J02207.1	Pavir.J02207.1	17800	107806	702	702	38	38	56.2	389962	1	1	1	937.518	2809.53	3	2809.53	-0.0005	0	85.36	19	31	1.9e-07	K	VLNEGDWLSLNGSTGEVILGK	Q	Deamidated (NQ)	0.000000000010000000000.0	File844 Spectrum419881 scans: 24845	25288.4	15604.5	38253.4	26141.5	35284.3	16374.8	19642.9	17501
3	Pavir.J02207.1	Pavir.J02207.1	17800	107806	702	702	38	38	56.2	389953	1	1	1	1405.77	2809.53	2	2809.53	-0.0034	0	58.71		31	8.7e-05	K	VLNEGDWLSLNGSTGEVILGK	Q	Deamidated (NQ)	0.000000000010000000000.0	File844 Spectrum419756 scans: 24711	21467.7	17544.4	27036.1	20301.1	19998.1	10755	14259.6	17702.8
3	Pavir.J02207.1	Pavir.J02207.1	17800	107806	702	702	38	38	56.2	390045	1	1	1	937.843	2810.51	3	2810.52	-0.0076	0	64.89	20	31	2.1e-05	K	VLNEGDWLSLNGSTGEVILGK	Q	2 Deamidated (NQ)	0.001000000010000000000.0	File842 Spectrum373375 scans: 25391	19841	13749.4	25516.9	17444.4	21078.4	10723.4	6210.13	13980.6
3	Pavir.J02207.1	Pavir.J02207.1	17800	107806	702	702	38	38	56.2	390056	1	1	1	937.845	2810.51	3	2810.52	-0.0045	0	73.88	21	31	2.7e-06	K	VLNEGDWLSLNGSTGEVILGK	Q	2 Deamidated (NQ)	0.001000000010000000000.0	File841 Spectrum350456 scans: 25475	14251.2	9473.73	22000.5	13760.3	16608.5	6377.37	7489.33	11514.1
3	Pavir.J02207.1	Pavir.J02207.1	17800	107806	702	702	38	38	56.2	389952	1	1	1	937.517	2809.53	3	2809.53	-0.0036	0	76.26		31	1.5e-06	K	VLNEGDWLSLNGSTGEVILGK	Q	Deamidated (NQ)	0.000000000010000000000.0	File844 Spectrum419935 scans: 24902	11966.9	8102.33	21601	14422.7	18621.8	9024.23	9079.74	10070.1
3	Pavir.J02207.1	Pavir.J02207.1	17800	107806	702	702	38	38	56.2	390061	1	1	1	937.845	2810.51	3	2810.52	-0.0039	0	71.51	20	31	4.6e-06	K	VLNEGDWLSLNGSTGEVILGK	Q	2 Deamidated (NQ)	0.001000000010000000000.0	File842 Spectrum373279 scans: 25288	11649.5	8853.26	15217.8	11146	12403.6	7235.96	8145.26	10339.2
3	Pavir.J02207.1	Pavir.J02207.1	17800	107806	702	702	38	38	56.2	390043	1	1	1	937.843	2810.51	3	2810.52	-0.008	0	82.22	22	31	4e-07	K	VLNEGDWLSLNGSTGEVILGK	Q	2 Deamidated (NQ)	0.001000000010000000000.0	File842 Spectrum373753 scans: 25794	11261.2	10401	15708.4	12161.9	13522.7	7206.16	8607.03	11637.4
3	Pavir.J02207.1	Pavir.J02207.1	17800	107806	702	702	38	38	56.2	390055	1	1	1	937.845	2810.51	3	2810.52	-0.0045	0	73.85	23	31	2.7e-06	K	VLNEGDWLSLNGSTGEVILGK	Q	2 Deamidated (NQ)	0.001000000010000000000.0	File842 Spectrum374018 scans: 26077	10313.2	8007.07	15814.8	10913.2	13473.6	6916.92	7376.46	9601.45
3	Pavir.J02207.1	Pavir.J02207.1	17800	107806	702	702	38	38	56.2	389964	1	1	1	937.518	2809.53	3	2809.53	-0.0003	0	68.8		31	8.5e-06	K	VLNEGDWLSLNGSTGEVILGK	Q	Deamidated (NQ)	0.000000000010000000000.0	File843 Spectrum397050 scans: 25482	9746.1	6093.37	14970.1	8358.83	14065.8	5549.43	7244.74	9327.89
3	Pavir.J02207.1	Pavir.J02207.1	17800	107806	702	702	38	38	56.2	390049	1	1	1	937.844	2810.51	3	2810.52	-0.0063	0	49.18	20	31	0.00079	K	VLNEGDWLSLNGSTGEVILGK	Q	2 Deamidated (NQ)	0.001000000010000000000.0	File842 Spectrum373740 scans: 25780	9354.63	6460.81	14589.7	9302.23	10503.8	6292.2	5673.95	8076.7
3	Pavir.J02207.1	Pavir.J02207.1	17800	107806	702	702	38	38	56.2	389973	1	1	1	937.52	2809.54	3	2809.53	0.0054	0	66.49	19	30	1.4e-05	K	VLNEGDWLSLNGSTGEVILGK	Q	Deamidated (NQ)	0.000000000010000000000.0	File843 Spectrum397591 scans: 26059	8519.09	6360.32	11555.2	7083.38	8727.53	5345.54	4848.4	5952.14
3	Pavir.J02207.1	Pavir.J02207.1	17800	107806	702	702	38	38	56.2	389947	1	1	1	937.516	2809.53	3	2809.53	-0.0052	0	61.25	17	31	4.9e-05	K	VLNEGDWLSLNGSTGEVILGK	Q	Deamidated (NQ)	0.000000000010000000000.0	File844 Spectrum419913 scans: 24879	8513.67	6141.85	12953.5	10422.3	11293.7	5995.19	6722.52	7262.75
3	Pavir.J02207.1	Pavir.J02207.1	17800	107806	702	702	38	38	56.2	390065	1	1	1	937.845	2810.51	3	2810.52	-0.003	0	79.09	23	31	8e-07	K	VLNEGDWLSLNGSTGEVILGK	Q	2 Deamidated (NQ)	0.001000000010000000000.0	File842 Spectrum373979 scans: 26035	8344.62	4442.71	9109.78	9858.82	7450.53	3948.33	5131.7	5494.71
3	Pavir.J02207.1	Pavir.J02207.1	17800	107806	702	702	38	38	56.2	389975	1	1	1	937.521	2809.54	3	2809.53	0.0094	0	64.2	26	30	2.3e-05	K	VLNEGDWLSLNGSTGEVILGK	Q	Deamidated (NQ)	0.000000000010000000000.0	File843 Spectrum397633 scans: 26104	6588.68	5123.06	7833.93	6056.05	7574.69	4003.8	4305.19	4628.07
3	Pavir.J02207.1	Pavir.J02207.1	17800	107806	702	702	38	38	56.2	390044	1	1	1	937.843	2810.51	3	2810.52	-0.0078	0	74.06	21	31	2.6e-06	K	VLNEGDWLSLNGSTGEVILGK	Q	2 Deamidated (NQ)	0.001000000010000000000.0	File842 Spectrum374538 scans: 26631	6228.7	4537.88	7663.21	5654.99	6465.45	3768.12	4613.3	5656.16
3	Pavir.J02207.1	Pavir.J02207.1	17800	107806	702	702	38	38	56.2	390069	1	1	1	937.846	2810.51	3	2810.52	-0.0017	0	76.33	19	31	1.5e-06	K	VLNEGDWLSLNGSTGEVILGK	Q	2 Deamidated (NQ)	0.001000000010000000000.0	File842 Spectrum374551 scans: 26645	5965.78	3974.65	5251.57	4270.72	5127.45	2303.15	2428.02	3694.16
3	Pavir.J02207.1	Pavir.J02207.1	17800	107806	702	702	38	38	56.2	390042	1	1	1	937.843	2810.51	3	2810.52	-0.0082	0	65.37	19	31	1.9e-05	K	VLNEGDWLSLNGSTGEVILGK	Q	2 Deamidated (NQ)	0.001000000010000000000.0	File842 Spectrum373257 scans: 25265	5898.16	6236.39	9497.42	6611.32	6617.17	4159.31	4802.11	5380.36
3	Pavir.J02207.1	Pavir.J02207.1	17800	107806	702	702	38	38	56.2	390053	1	1	1	937.844	2810.51	3	2810.52	-0.0049	0	56.56	23	31	0.00014	K	VLNEGDWLSLNGSTGEVILGK	Q	2 Deamidated (NQ)	0.001000000010000000000.0	File842 Spectrum373817 scans: 25862	5500.73	2980.78	6907.32	5008.12	4073.61	2689.18	2704.41	4372.45
3	Pavir.J02207.1	Pavir.J02207.1	17800	107806	702	702	38	38	56.2	389853	1	1	1	937.182	2808.52	3	2808.55	-0.025	0	53.67	21	31	0.00027	K	VLNEGDWLSLNGSTGEVILGK	Q			File843 Spectrum397069 scans: 25502	4988.75	3923.55	5829.92	5584.15	6678.22	2616.69	3716.81	3705.37
3	Pavir.J02207.1	Pavir.J02207.1	17800	107806	702	702	38	38	56.2	390060	1	1	1	937.845	2810.51	3	2810.52	-0.0041	0	66.29	20	31	1.5e-05	K	VLNEGDWLSLNGSTGEVILGK	Q	2 Deamidated (NQ)	0.001000000010000000000.0	File841 Spectrum350402 scans: 25417	4710.85	4035.4	6627.85	4746.42	4485.36	2162.94	3142.9	3585.41
3	Pavir.J02207.1	Pavir.J02207.1	17800	107806	702	702	38	38	56.2	390047	1	1	1	937.844	2810.51	3	2810.52	-0.0067	0	57.17	19	31	0.00012	K	VLNEGDWLSLNGSTGEVILGK	Q	2 Deamidated (NQ)	0.001000000010000000000.0	File842 Spectrum374116 scans: 26181	3569.72	1677.47	3723.19	2890.96	3283.58	1587.3	2241.16	3120.14
3	Pavir.J02207.1	Pavir.J02207.1	17800	107806	702	702	38	38	56.2	390068	1	1	1	937.845	2810.51	3	2810.52	-0.0023	0	57.45	16	31	0.00012	K	VLNEGDWLSLNGSTGEVILGK	Q	2 Deamidated (NQ)	0.001000000010000000000.0	File841 Spectrum351121 scans: 26184	3064.5	2403.85	3574.9	2773.99	3584.4	2250.24	2157.55	2293.85
3	Pavir.J02207.1	Pavir.J02207.1	17800	107806	702	702	38	38	56.2	410211	2	1	1	994.824	2981.45	3	2981.45	-0.0038	0	63.14		30	2.7e-05	R	GTAVNVQSMVFGNMGDTSGTGVLFTR	N	2 Oxidation (M)	0.00000000300003000000000000.0	File827 Spectrum14865 scans: 18990	2823.87	2894.93	3813.13	3183.78	2944.6	2138.14	1115.88	2020.3
3	Pavir.J02207.1	Pavir.J02207.1	17800	107806	702	702	38	38	56.2	390059	1	1	1	703.635	2810.51	4	2810.52	-0.0042	0	48.45	24	31	0.00092	K	VLNEGDWLSLNGSTGEVILGK	Q	2 Deamidated (NQ)	0.001000000010000000000.0	File842 Spectrum373282 scans: 25291	1787.93	2171.11	3500.5	2181.4	2677.31	1279.47	1711.06	1457.48
3	Pavir.J02207.1	Pavir.J02207.1	17800	107806	702	702	38	38	56.2	389974	1	1	1	937.52	2809.54	3	2809.53	0.0058	0	36.75	18	30	0.013	K	VLNEGDWLSLNGSTGEVILGK	Q	Deamidated (NQ)	0.000000000010000000000.0	File843 Spectrum397656 scans: 26128	1665.93	1562.45	2311.14	2187.44	2982.48	1359.29	1505.51	1847.64
3	Pavir.J02207.1	Pavir.J02207.1	17800	107806	702	702	38	38	56.2	407053	1	1	1	984.49	2950.45	3	2950.45	0.0008	0	31.39	15	30	0.038	R	GTAVNVQSMVFGNMGDTSGTGVLFTR	N	Deamidated (NQ)	0.00000000000010000000000000.0	File831 Spectrum118385 scans: 25969	797.49	1501.76	958.342	1220.12	1115.91	844.257	1079.93	732.441
4	Pavir.J15849.1	Pavir.J15849.1	17610	107550	712	712	39	39	58.4	366601	1	1	1	647.587	2586.32	4	2586.32	-0.0013	0	37.4	16	30	0.01	K	VGICGEHGGEPQSVAFFAK	A	Methylthio (C)	0.0002000000000000000.0	File827 Spectrum15648 scans: 19826	145760	144331	160752	112728	140399	70184.8	59113.7	145412
4	Pavir.J15849.1	Pavir.J15849.1	17610	107550	712	712	39	39	58.4	366603	1	1	1	863.113	2586.32	3	2586.32	-0.0008	0	81.08		30	4.4e-07	K	VGICGEHGGEPQSVAFFAK	A	Methylthio (C)	0.0002000000000000000.0	File827 Spectrum15722 scans: 19905	106389	77395.7	162073	82009.7	118115	64100.3	68805.5	56864.3
4	Pavir.J15849.1	Pavir.J15849.1	17610	107550	712	712	39	39	58.4	366602	1	1	1	863.113	2586.32	3	2586.32	-0.0011	0	44.93		30	0.0018	K	VGICGEHGGEPQSVAFFAK	A	Methylthio (C)	0.0002000000000000000.0	File827 Spectrum15680 scans: 19860	105928	59585.8	144837	91651.3	105780	69353.9	60939.5	57458.5
4	Pavir.J15849.1	Pavir.J15849.1	17610	107550	712	712	39	39	58.4	392986	1	1	1	946.86	2837.56	3	2837.56	-0.0045	0	46.34		30	0.0013	K	LLQEGDWLSLNGSTGEVILGK	Q	Deamidated (NQ)	0.000000000010000000000.0	File846 Spectrum469862 scans: 27232	99997	86319.1	141318	94482.1	148655	97778.9	78016.8	95465.1
4	Pavir.J15849.1	Pavir.J15849.1	17610	107550	712	712	39	39	58.4	366604	1	1	1	863.113	2586.32	3	2586.32	-0.0001	0	50.39		30	0.00051	K	VGICGEHGGEPQSVAFFAK	A	Methylthio (C)	0.0002000000000000000.0	File827 Spectrum15755 scans: 19940	91203.4	70240	123664	72540.1	103101	61651.3	53143.8	58142.4
4	Pavir.J15849.1	Pavir.J15849.1	17610	107550	712	712	39	39	58.4	366605	1	1	1	647.587	2586.32	4	2586.32	0.0001	0	30.71		30	0.047	K	VGICGEHGGEPQSVAFFAK	A	Methylthio (C)	0.0002000000000000000.0	File827 Spectrum15622 scans: 19798	80132.5	72573.8	94453.8	40464.2	70875.5	54144.4	38220.4	81888.1
4	Pavir.J15849.1	Pavir.J15849.1	17610	107550	712	712	39	39	58.4	366608	1	1	1	863.114	2586.32	3	2586.32	0.0009	0	55.29		30	0.00016	K	VGICGEHGGEPQSVAFFAK	A	Methylthio (C)	0.0002000000000000000.0	File827 Spectrum15636 scans: 19813	55182	43356.3	80429.4	49139.8	64743.1	39967.7	33304.3	34385.4
4	Pavir.J15849.1	Pavir.J15849.1	17610	107550	712	712	39	39	58.4	366607	1	1	1	863.114	2586.32	3	2586.32	0.0009	0	39.49		30	0.0062	K	VGICGEHGGEPQSVAFFAK	A	Methylthio (C)	0.0002000000000000000.0	File827 Spectrum15785 scans: 19972	42059	26855.1	73851.9	38036.8	56591.5	35821.8	25826.1	27860.4
4	Pavir.J15849.1	Pavir.J15849.1	17610	107550	712	712	39	39	58.4	392996	1	1	1	946.861	2837.56	3	2837.56	-0.0012	0	51.44	18	30	0.00041	K	LLQEGDWLSLNGSTGEVILGK	Q	Deamidated (NQ)	0.000000000010000000000.0	File846 Spectrum470435 scans: 27843	18414.9	16443.5	27732	15260.4	22421.3	11474	11305.2	12971.6
4	Pavir.J15849.1	Pavir.J15849.1	17610	107550	712	712	39	39	58.4	392984	1	1	1	946.86	2837.56	3	2837.56	-0.0062	0	77.17		30	1.1e-06	K	LLQEGDWLSLNGSTGEVILGK	Q	Deamidated (NQ)	0.000000000010000000000.0	File845 Spectrum445653 scans: 27049	16925.9	14773.5	22927.8	18285	24276.5	13290.4	11842.1	15460.5
4	Pavir.J15849.1	Pavir.J15849.1	17610	107550	712	712	39	39	58.4	366606	1	1	1	863.114	2586.32	3	2586.32	0.0005	0	34.36		30	0.02	K	VGICGEHGGEPQSVAFFAK	A	Methylthio (C)	0.0002000000000000000.0	File827 Spectrum15823 scans: 20012	15078.9	9538.65	20439.3	14687.1	18093.2	8976.31	8058.32	8564.4
4	Pavir.J15849.1	Pavir.J15849.1	17610	107550	712	712	39	39	58.4	392972	1	1	1	946.857	2837.55	3	2837.56	-0.0157	0	72.6		30	3.2e-06	K	LLQEGDWLSLNGSTGEVILGK	Q	Deamidated (NQ)	0.000000000010000000000.0	File846 Spectrum470059 scans: 27442	14834.6	8043.06	17645.7	14380	18329.2	8472.05	7720.55	11850.5
4	Pavir.J15849.1	Pavir.J15849.1	17610	107550	712	712	39	39	58.4	392998	1	1	1	1419.79	2837.56	2	2837.56	-0.0007	0	44.4	23	30	0.0021	K	LLQEGDWLSLNGSTGEVILGK	Q	Deamidated (NQ)	0.000000000010000000000.0	File845 Spectrum445818 scans: 27225	14155.4	11030.2	25366.8	13698.7	19508	8689.63	8268.32	11413.2
4	Pavir.J15849.1	Pavir.J15849.1	17610	107550	712	712	39	39	58.4	393008	1	1	1	1419.79	2837.57	2	2837.56	0.0034	0	46.65	24	30	0.0012	K	LLQEGDWLSLNGSTGEVILGK	Q	Deamidated (NQ)	0.000000000010000000000.0	File845 Spectrum445726 scans: 27126	10907.5	6919.01	12852.1	10586.8	13070.5	5503.1	5309.24	8501.61
4	Pavir.J15849.1	Pavir.J15849.1	17610	107550	712	712	39	39	58.4	393007	1	1	1	946.863	2837.57	3	2837.56	0.0028	0	63.74	29	30	2.3e-05	K	LLQEGDWLSLNGSTGEVILGK	Q	Deamidated (NQ)	0.000000000010000000000.0	File846 Spectrum470258 scans: 27654	10138.4	9094.41	14086.9	11152.4	11524.2	6044.19	7051.28	7338.99
4	Pavir.J15849.1	Pavir.J15849.1	17610	107550	712	712	39	39	58.4	392868	1	1	1	946.526	2836.56	3	2836.58	-0.023	0	61.33	22	30	4.2e-05	K	LLQEGDWLSLNGSTGEVILGK	Q			File845 Spectrum446360 scans: 27803	9030.45	8487.71	11796.5	8572.29	10698.3	5396.02	6179.28	7383.83
4	Pavir.J15849.1	Pavir.J15849.1	17610	107550	712	712	39	39	58.4	392999	1	1	1	946.862	2837.56	3	2837.56	-0.0005	0	51.32	17	30	0.00042	K	LLQEGDWLSLNGSTGEVILGK	Q	Deamidated (NQ)	0.000000000010000000000.0	File845 Spectrum445968 scans: 27385	8094.98	7078.07	9393.17	9029.21	7343.5	6159.97	5177.9	5081.01
4	Pavir.J15849.1	Pavir.J15849.1	17610	107550	712	712	39	39	58.4	393004	1	1	1	946.863	2837.57	3	2837.56	0.0022	0	74.13		30	2.1e-06	K	LLQEGDWLSLNGSTGEVILGK	Q	Deamidated (NQ)	0.000000000010000000000.0	File845 Spectrum446155 scans: 27584	7999.8	8844.6	12841.3	9276.4	10083.5	7352.81	6169.27	8030.73
4	Pavir.J15849.1	Pavir.J15849.1	17610	107550	712	712	39	39	58.4	392975	1	1	1	946.857	2837.55	3	2837.56	-0.0142	0	62.93	17	30	3e-05	K	LLQEGDWLSLNGSTGEVILGK	Q	Deamidated (NQ)	0.000000000010000000000.0	File846 Spectrum470090 scans: 27475	5655.26	4758.91	9053.35	5383.35	8518.35	4324.97	3458.11	4913.96
4	Pavir.J15849.1	Pavir.J15849.1	17610	107550	712	712	39	39	58.4	393001	1	1	1	946.862	2837.57	3	2837.56	0.0015	0	39.37	19	30	0.0064	K	LLQEGDWLSLNGSTGEVILGK	Q	Deamidated (NQ)	0.000000000010000000000.0	File846 Spectrum470465 scans: 27875	4970.64	3384.36	7270.48	4255.9	5245.85	2902.46	4494.73	3108.92
4	Pavir.J15849.1	Pavir.J15849.1	17610	107550	712	712	39	39	58.4	392997	1	1	1	946.861	2837.56	3	2837.56	-0.0011	0	57.44		30	0.0001	K	LLQEGDWLSLNGSTGEVILGK	Q	Deamidated (NQ)	0.000000000010000000000.0	File845 Spectrum446008 scans: 27427	4678.17	2643.94	4427.41	3086.11	3559.49	2578.88	1953.98	2944.12
4	Pavir.J15849.1	Pavir.J15849.1	17610	107550	712	712	39	39	58.4	393005	1	1	1	946.863	2837.57	3	2837.56	0.0026	0	44.49		30	0.002	K	LLQEGDWLSLNGSTGEVILGK	Q	Deamidated (NQ)	0.000000000010000000000.0	File845 Spectrum446381 scans: 27825	3868.85	2561.76	4803.81	3059.21	4480.77	2589.71	3080.85	3182.92
4	Pavir.J15849.1	Pavir.J15849.1	17610	107550	712	712	39	39	58.4	392995	1	1	1	946.861	2837.56	3	2837.56	-0.0012	0	61.26	21	30	4.3e-05	K	LLQEGDWLSLNGSTGEVILGK	Q	Deamidated (NQ)	0.000000000010000000000.0	File845 Spectrum446398 scans: 27843	3202.63	3206.61	4618.51	4052.07	4013.32	2034.89	2023.18	3838.79
4	Pavir.J15849.1	Pavir.J15849.1	17610	107550	712	712	39	39	58.4	410211	1	0	1	994.824	2981.45	3	2981.45	-0.0038	0	72.48		30	3.1e-06	R	GTAVNVQSMVFGNMGNTSGTGVLFTR	N	Deamidated (NQ); 2 Oxidation (M)	0.00000000300013000000000000.0	File827 Spectrum14865 scans: 18990	2823.87	2894.93	3813.13	3183.78	2944.6	2138.14	1115.88	2020.3
4	Pavir.J15849.1	Pavir.J15849.1	17610	107550	712	712	39	39	58.4	410084	1	1	1	994.499	2980.47	3	2980.47	0.0052	0	65.05		30	1.9e-05	R	GTAVNVQSMVFGNMGNTSGTGVLFTR	N	2 Oxidation (M)	0.00000000300003000000000000.0	File830 Spectrum87846 scans: 18395	2685.97	3390.76	4782.31	4053.58	3392.92	2070.83	2942.95	1807.28
4	Pavir.J15849.1	Pavir.J15849.1	17610	107550	712	712	39	39	58.4	410222	1	1	1	994.826	2981.46	3	2981.45	0.0026	0	34.47		30	0.021	R	GTAVNVQSMVFGNMGNTSGTGVLFTR	N	Deamidated (NQ); 2 Oxidation (M)	0.00000000300013000000000000.0	File829 Spectrum64288 scans: 19288	1400.66	1431.43	2300.54	720.435	1587.92	1168.84	1339.31	1409.27
4	Pavir.J15849.1	Pavir.J15849.1	17610	107550	712	712	39	39	58.4	407053	1	0	1	984.49	2950.45	3	2950.45	0.0008	0	31.39	15	30	0.038	R	GTAVNVQSMVFGNMGNTSGTGVLFTR	N	2 Deamidated (NQ)	0.00000000000010010000000000.0	File831 Spectrum118385 scans: 25969	797.49	1501.76	958.342	1220.12	1115.91	844.257	1079.93	732.441
5	Pavir.J03033.1	Pavir.J03033.1	15182	39537	712	712	16	16	64.9	202296	1	1	1	869.492	1736.97	2	1736.97	-0.0031	0	68.99	19	29	5.3e-06	R	FVQAGSEVSALLGR	M			File831 Spectrum117728 scans: 25269	4.01278e+06	4.26728e+06	1.86093e+06	2.91004e+06	1.10238e+06	1.21793e+06	1.2123e+06	2.88021e+06
5	Pavir.J03033.1	Pavir.J03033.1	15182	39537	712	712	16	16	64.9	202309	1	1	1	869.493	1736.97	2	1736.97	-0.0014	0	72.53	24	29	2.4e-06	R	FVQAGSEVSALLGR	M			File831 Spectrum117818 scans: 25365	2.82455e+06	2.69341e+06	1.2051e+06	1.70794e+06	868997	597010	880880	1.78374e+06
5	Pavir.J03033.1	Pavir.J03033.1	15182	39537	712	712	16	16	64.9	217677	1	1	1	896.484	1790.95	2	1790.95	-0.0016	0	52.68		30	0.00027	R	VGLTALTMAEYFR	D	Oxidation (M)	0.0000000300000.0	File831 Spectrum114579 scans: 21910	2.68491e+06	2.59763e+06	1.24168e+06	2.12168e+06	897627	650470	873392	1.60996e+06
5	Pavir.J03033.1	Pavir.J03033.1	15182	39537	712	712	16	16	64.9	202310	1	1	1	869.493	1736.97	2	1736.97	-0.0011	0	65.2	24	29	1.3e-05	R	FVQAGSEVSALLGR	M			File831 Spectrum117908 scans: 25461	1.80405e+06	1.6379e+06	756039	1.1764e+06	507181	439779	485784	1.18056e+06
5	Pavir.J03033.1	Pavir.J03033.1	15182	39537	712	712	16	16	64.9	247694	1	1	1	953.51	1905.01	2	1905.01	-0.0021	0	63.08		30	2.5e-05	K	VALVYGQMNEPPGAR	M			File829 Spectrum62469 scans: 17348	1.55069e+06	1.51271e+06	1.25987e+06	1.16261e+06	1.38548e+06	1.11989e+06	873418	1.02517e+06
5	Pavir.J03033.1	Pavir.J03033.1	15182	39537	712	712	16	16	64.9	213353	1	1	1	888.485	1774.96	2	1774.96	-0.0035	0	45.53	25	29	0.0014	R	VGLTALTMAEYFR	D			File834 Spectrum192052 scans: 28794	1.48755e+06	1.68368e+06	562148	830931	207221	301836	391765	1.18841e+06
5	Pavir.J03033.1	Pavir.J03033.1	15182	39537	712	712	16	16	64.9	247689	1	1	1	953.51	1905.01	2	1905.01	-0.0024	0	59.39		30	6e-05	K	VALVYGQMNEPPGAR	M			File829 Spectrum62379 scans: 17252	1.4404e+06	1.08342e+06	1.08043e+06	1.1438e+06	1.18026e+06	978571	728277	910815
5	Pavir.J03033.1	Pavir.J03033.1	15182	39537	712	712	16	16	64.9	197214	1	1	1	574.301	1719.88	3	1719.88	-0.0031	0	53.75		28	0.00014	R	IVGNEHYETAQR	V			File833 Spectrum146844 scans: 6120	1.30762e+06	1.46045e+06	1.12124e+06	1.13296e+06	1.29986e+06	886341	929871	1.00095e+06
5	Pavir.J03033.1	Pavir.J03033.1	15182	39537	712	712	16	16	64.9	247686	1	1	1	953.51	1905.01	2	1905.01	-0.0027	0	40.86	15	30	0.0043	K	VALVYGQMNEPPGAR	M			File829 Spectrum62619 scans: 17508	1.26996e+06	1.34074e+06	1.01932e+06	839645	1.08998e+06	1.00718e+06	655894	934135
5	Pavir.J03033.1	Pavir.J03033.1	15182	39537	712	712	16	16	64.9	247699	1	1	1	953.511	1905.01	2	1905.01	-0.0019	0	38.14	15	30	0.0079	K	VALVYGQMNEPPGAR	M			File829 Spectrum62560 scans: 17445	1.20402e+06	1.18221e+06	1.06568e+06	666771	1.00247e+06	976609	759741	908797
5	Pavir.J03033.1	Pavir.J03033.1	15182	39537	712	712	16	16	64.9	252079	1	1	1	961.508	1921	2	1921	-0.0017	0	59.72	18	29	5.1e-05	K	VALVYGQMNEPPGAR	M	Oxidation (M)	0.000000030000000.0	File845 Spectrum432137 scans: 12632	1.03803e+06	991181	760941	896029	752163	678035	491222	595550
5	Pavir.J03033.1	Pavir.J03033.1	15182	39537	712	712	16	16	64.9	252115	1	1	1	961.509	1921	2	1921	-0.0008	0	59.7	17	29	5.2e-05	K	VALVYGQMNEPPGAR	M	Oxidation (M)	0.000000030000000.0	File845 Spectrum432212 scans: 12712	1.02839e+06	967587	944615	897697	849139	685231	497743	636135
5	Pavir.J03033.1	Pavir.J03033.1	15182	39537	712	712	16	16	64.9	252142	1	1	1	961.509	1921	2	1921	0.0003	0	57.94		30	8.2e-05	K	VALVYGQMNEPPGAR	M	Oxidation (M)	0.000000030000000.0	File845 Spectrum432107 scans: 12600	974815	831429	631684	676125	683717	456932	425828	500365
5	Pavir.J03033.1	Pavir.J03033.1	15182	39537	712	712	16	16	64.9	336981	1	1	1	1183.12	2364.23	2	2364.23	-0.0026	0	44.25	18	30	0.0022	K	GIYPAVDPLDSTSTMLQPR	I			File845 Spectrum439682 scans: 20680	806054	451234	498621	633235	579782	516279	532305	293066
5	Pavir.J03033.1	Pavir.J03033.1	15182	39537	712	712	16	16	64.9	252044	1	1	1	961.508	1921	2	1921	-0.0027	0	48.66		30	0.00069	K	VALVYGQMNEPPGAR	M	Oxidation (M)	0.000000030000000.0	File845 Spectrum432319 scans: 12826	793415	717860	611542	576763	685894	483382	409563	387691
5	Pavir.J03033.1	Pavir.J03033.1	15182	39537	712	712	16	16	64.9	247683	1	1	1	953.51	1905.01	2	1905.01	-0.0028	0	47.36		30	0.00095	K	VALVYGQMNEPPGAR	M			File829 Spectrum62694 scans: 17588	777273	834178	681200	647313	623638	567246	576630	572567
5	Pavir.J03033.1	Pavir.J03033.1	15182	39537	712	712	16	16	64.9	252067	1	1	1	961.508	1921	2	1921	-0.0022	0	54.09	17	30	0.0002	K	VALVYGQMNEPPGAR	M	Oxidation (M)	0.000000030000000.0	File845 Spectrum432288 scans: 12793	771712	882384	615548	679380	678288	508556	340419	485790
5	Pavir.J03033.1	Pavir.J03033.1	15182	39537	712	712	16	16	64.9	213363	1	1	1	888.486	1774.96	2	1774.96	-0.0012	0	55.42	25	30	0.00015	R	VGLTALTMAEYFR	D			File835 Spectrum216989 scans: 28022	764980	799388	285533	425667	172616	169763	229977	733114
5	Pavir.J03033.1	Pavir.J03033.1	15182	39537	712	712	16	16	64.9	202301	1	1	1	869.493	1736.97	2	1736.97	-0.002	0	63.07	24	29	2e-05	R	FVQAGSEVSALLGR	M			File830 Spectrum93872 scans: 24823	693323	684896	283311	483602	186244	186767	263981	481194
5	Pavir.J03033.1	Pavir.J03033.1	15182	39537	712	712	16	16	64.9	252046	1	1	1	961.508	1921	2	1921	-0.0027	0	49.08	16	30	0.00063	K	VALVYGQMNEPPGAR	M	Oxidation (M)	0.000000030000000.0	File829 Spectrum59110 scans: 13765	661389	635291	553274	465268	586672	479773	335843	445205
5	Pavir.J03033.1	Pavir.J03033.1	15182	39537	712	712	16	16	64.9	252042	1	1	1	961.508	1921	2	1921	-0.0029	0	52.68		30	0.00027	K	VALVYGQMNEPPGAR	M	Oxidation (M)	0.000000030000000.0	File829 Spectrum59064 scans: 13716	641383	692297	566364	515376	493476	572923	372541	436236
5	Pavir.J03033.1	Pavir.J03033.1	15182	39537	712	712	16	16	64.9	252088	1	1	1	961.508	1921	2	1921	-0.0016	0	63.07		29	2.4e-05	K	VALVYGQMNEPPGAR	M	Oxidation (M)	0.000000030000000.0	File845 Spectrum432077 scans: 12568	564843	591413	465983	499414	601780	352366	292259	413028
5	Pavir.J03033.1	Pavir.J03033.1	15182	39537	712	712	16	16	64.9	252048	1	1	1	961.508	1921	2	1921	-0.0026	0	52.16	18	30	0.00031	K	VALVYGQMNEPPGAR	M	Oxidation (M)	0.000000030000000.0	File829 Spectrum59034 scans: 13684	551108	509007	429500	489993	420528	473548	278553	379843
5	Pavir.J03033.1	Pavir.J03033.1	15182	39537	712	712	16	16	64.9	252073	1	1	1	961.508	1921	2	1921	-0.0019	0	52.82	16	29	0.00026	K	VALVYGQMNEPPGAR	M	Oxidation (M)	0.000000030000000.0	File829 Spectrum59185 scans: 13845	549824	506908	381803	474632	503331	498488	357070	404620
5	Pavir.J03033.1	Pavir.J03033.1	15182	39537	712	712	16	16	64.9	252064	1	1	1	961.508	1921	2	1921	-0.0022	0	55.34	20	30	0.00015	K	VALVYGQMNEPPGAR	M	Oxidation (M)	0.000000030000000.0	File845 Spectrum432364 scans: 12874	513578	604926	436041	413749	398057	320008	244668	255956
5	Pavir.J03033.1	Pavir.J03033.1	15182	39537	712	712	16	16	64.9	252094	1	1	1	961.508	1921	2	1921	-0.0015	0	52.11		29	0.00029	K	VALVYGQMNEPPGAR	M	Oxidation (M)	0.000000030000000.0	File845 Spectrum432033 scans: 12521	496739	491382	417106	453613	397889	352764	260979	224565
5	Pavir.J03033.1	Pavir.J03033.1	15182	39537	712	712	16	16	64.9	252036	1	1	1	641.341	1921	3	1921	-0.0031	0	33.34	19	29	0.023	K	VALVYGQMNEPPGAR	M	Oxidation (M)	0.000000030000000.0	File829 Spectrum59004 scans: 13652	489246	328742	508870	619945	462134	322798	299660	549359
5	Pavir.J03033.1	Pavir.J03033.1	15182	39537	712	712	16	16	64.9	252039	1	1	1	961.507	1921	2	1921	-0.0031	0	55.85	16	30	0.00013	K	VALVYGQMNEPPGAR	M	Oxidation (M)	0.000000030000000.0	File829 Spectrum58989 scans: 13636	485507	500949	365879	376149	398300	411938	326427	274455
5	Pavir.J03033.1	Pavir.J03033.1	15182	39537	712	712	16	16	64.9	252049	1	1	1	961.508	1921	2	1921	-0.0026	0	57.17	18	30	9.7e-05	K	VALVYGQMNEPPGAR	M	Oxidation (M)	0.000000030000000.0	File845 Spectrum432408 scans: 12921	478917	446928	279548	339510	339117	273212	204236	266719
5	Pavir.J03033.1	Pavir.J03033.1	15182	39537	712	712	16	16	64.9	252128	1	1	1	961.509	1921	2	1921	-0.0004	0	63.19	17	29	2.4e-05	K	VALVYGQMNEPPGAR	M	Oxidation (M)	0.000000030000000.0	File845 Spectrum432004 scans: 12490	474556	436103	289356	356587	359693	284133	222859	257862
5	Pavir.J03033.1	Pavir.J03033.1	15182	39537	712	712	16	16	64.9	247702	1	1	1	953.511	1905.01	2	1905.01	-0.0018	0	40.35		29	0.0046	K	VALVYGQMNEPPGAR	M			File829 Spectrum62829 scans: 17732	461474	428764	381640	338545	311188	349221	227401	334324
5	Pavir.J03033.1	Pavir.J03033.1	15182	39537	712	712	16	16	64.9	217666	1	1	1	896.482	1790.95	2	1790.95	-0.0045	0	51.57		29	0.00034	R	VGLTALTMAEYFR	D	Oxidation (M)	0.0000000300000.0	File832 Spectrum138161 scans: 22078	458758	423049	183971	370962	131466	121006	127292	299233
5	Pavir.J03033.1	Pavir.J03033.1	15182	39537	712	712	16	16	64.9	336995	1	1	1	1183.12	2364.23	2	2364.23	-0.0016	0	47.39	18	30	0.0011	K	GIYPAVDPLDSTSTMLQPR	I			File845 Spectrum439772 scans: 20776	433030	381390	407546	364566	540603	382703	304200	341948
5	Pavir.J03033.1	Pavir.J03033.1	15182	39537	712	712	16	16	64.9	252016	1	1	1	961.507	1921	2	1921	-0.0043	0	67.05		29	9.5e-06	K	VALVYGQMNEPPGAR	M	Oxidation (M)	0.000000030000000.0	File829 Spectrum59229 scans: 13892	394695	432074	367933	320472	350967	296056	253391	279500
5	Pavir.J03033.1	Pavir.J03033.1	15182	39537	712	712	16	16	64.9	247700	1	1	1	953.511	1905.01	2	1905.01	-0.0019	0	59.42		30	5.9e-05	K	VALVYGQMNEPPGAR	M			File829 Spectrum62784 scans: 17684	381251	396404	343773	366750	299816	310825	217379	301475
5	Pavir.J03033.1	Pavir.J03033.1	15182	39537	712	712	16	16	64.9	247663	1	1	1	953.51	1905	2	1905.01	-0.0041	0	62.73		29	2.6e-05	K	VALVYGQMNEPPGAR	M			File828 Spectrum38040 scans: 17392	380691	373263	323675	342033	347855	355383	231558	246987
5	Pavir.J03033.1	Pavir.J03033.1	15182	39537	712	712	16	16	64.9	202318	1	1	1	869.494	1736.97	2	1736.97	-0.0004	0	68.92	24	29	5.5e-06	R	FVQAGSEVSALLGR	M			File830 Spectrum93948 scans: 24904	362821	295737	142297	206846	103526	90470.5	94643.1	219744
5	Pavir.J03033.1	Pavir.J03033.1	15182	39537	712	712	16	16	64.9	197233	1	1	1	574.302	1719.88	3	1719.88	-0.0005	0	32.68	20	28	0.019	R	IVGNEHYETAQR	V			File834 Spectrum170543 scans: 5851	337776	383405	317353	281743	261565	218497	172721	205954
5	Pavir.J03033.1	Pavir.J03033.1	15182	39537	712	712	16	16	64.9	336996	1	1	1	1183.12	2364.23	2	2364.23	-0.0016	0	49.06	16	30	0.00072	K	GIYPAVDPLDSTSTMLQPR	I			File845 Spectrum439802 scans: 20808	327160	325047	361094	269398	328592	304345	243110	270195
5	Pavir.J03033.1	Pavir.J03033.1	15182	39537	712	712	16	16	64.9	197549	1	1	1	574.63	1720.87	3	1720.87	-0.0003	0	54.82	17	27	9.9e-05	R	IVGNEHYETAQR	V	Deamidated (NQ)	0.000100000000.0	File830 Spectrum77462 scans: 7319	323685	255450	190682	166576	197292	229553	132770	173216
5	Pavir.J03033.1	Pavir.J03033.1	15182	39537	712	712	16	16	64.9	213354	1	1	1	888.486	1774.96	2	1774.96	-0.0027	0	41.45		29	0.0035	R	VGLTALTMAEYFR	D			File834 Spectrum191962 scans: 28698	322306	367875	119539	194300	109639	88230.1	111546	341163
5	Pavir.J03033.1	Pavir.J03033.1	15182	39537	712	712	16	16	64.9	202313	1	1	1	869.493	1736.97	2	1736.97	-0.0006	0	58.01	23	29	6.9e-05	R	FVQAGSEVSALLGR	M			File831 Spectrum117983 scans: 25541	321412	328215	161427	201615	122012	87972	93285.5	252705
5	Pavir.J03033.1	Pavir.J03033.1	15182	39537	712	712	16	16	64.9	172586	1	1	1	547.645	1639.91	3	1639.92	-0.0104	0	46.24	25	30	0.0012	K	AINLEEESK	L			File832 Spectrum127003 scans: 10175	319785	341614	305299	302841	220289	257298	194853	183643
5	Pavir.J03033.1	Pavir.J03033.1	15182	39537	712	712	16	16	64.9	252020	1	1	1	961.507	1921	2	1921	-0.0039	0	45.01		29	0.0015	K	VALVYGQMNEPPGAR	M	Oxidation (M)	0.000000030000000.0	File829 Spectrum58899 scans: 13540	318389	354696	252337	275041	274687	227108	177380	239588
5	Pavir.J03033.1	Pavir.J03033.1	15182	39537	712	712	16	16	64.9	172846	1	1	1	547.975	1640.9	3	1640.91	-0.0049	0	42.83		29	0.0023	K	AINLEEESK	L	Deamidated (NQ)	0.001000000.0	File828 Spectrum30740 scans: 9605	304348	196095	239560	194915	285376	227261	153269	222995
5	Pavir.J03033.1	Pavir.J03033.1	15182	39537	712	712	16	16	64.9	252065	1	1	1	961.508	1921	2	1921	-0.0022	0	52.7	16	30	0.00027	K	VALVYGQMNEPPGAR	M	Oxidation (M)	0.000000030000000.0	File829 Spectrum59319 scans: 13988	301451	321554	231345	197602	254664	222389	186800	212568
5	Pavir.J03033.1	Pavir.J03033.1	15182	39537	712	712	16	16	64.9	252114	1	1	1	961.509	1921	2	1921	-0.0008	0	45.9	18	29	0.0013	K	VALVYGQMNEPPGAR	M	Oxidation (M)	0.000000030000000.0	File845 Spectrum432498 scans: 13017	301306	281630	242426	232646	229600	177077	146377	158978
5	Pavir.J03033.1	Pavir.J03033.1	15182	39537	712	712	16	16	64.9	247672	1	1	1	953.51	1905.01	2	1905.01	-0.0035	0	62.71		30	2.8e-05	K	VALVYGQMNEPPGAR	M			File829 Spectrum62289 scans: 17156	291500	283018	232390	231484	232770	255765	177464	202254
5	Pavir.J03033.1	Pavir.J03033.1	15182	39537	712	712	16	16	64.9	247654	1	1	1	953.509	1905	2	1905.01	-0.0055	0	67.8	18	29	8.1e-06	K	VALVYGQMNEPPGAR	M			File828 Spectrum37949 scans: 17295	281719	348962	285558	238852	263445	267593	186088	220977
5	Pavir.J03033.1	Pavir.J03033.1	15182	39537	712	712	16	16	64.9	247684	1	1	1	953.51	1905.01	2	1905.01	-0.0027	0	44.43		30	0.0019	K	VALVYGQMNEPPGAR	M			File828 Spectrum38085 scans: 17440	277770	314809	254176	255924	281435	242638	182271	199227
5	Pavir.J03033.1	Pavir.J03033.1	15182	39537	712	712	16	16	64.9	252066	1	1	1	961.508	1921	2	1921	-0.0022	0	45.67		30	0.0014	K	VALVYGQMNEPPGAR	M	Oxidation (M)	0.000000030000000.0	File829 Spectrum59349 scans: 14020	258128	272767	259392	237219	200679	219256	167110	212120
5	Pavir.J03033.1	Pavir.J03033.1	15182	39537	712	712	16	16	64.9	252150	1	1	1	961.509	1921	2	1921	0.0007	0	63.65		30	2.2e-05	K	VALVYGQMNEPPGAR	M	Oxidation (M)	0.000000030000000.0	File845 Spectrum431959 scans: 12442	252889	218785	180547	215508	242093	140331	129402	155951
5	Pavir.J03033.1	Pavir.J03033.1	15182	39537	712	712	16	16	64.9	252072	1	1	1	961.508	1921	2	1921	-0.0019	0	55.71	16	29	0.00013	K	VALVYGQMNEPPGAR	M	Oxidation (M)	0.000000030000000.0	File829 Spectrum59379 scans: 14052	252102	263205	206210	219176	203331	218280	153898	177252
5	Pavir.J03033.1	Pavir.J03033.1	15182	39537	712	712	16	16	64.9	213359	1	1	1	888.486	1774.96	2	1774.96	-0.0017	0	55.59	22	30	0.00014	R	VGLTALTMAEYFR	D			File834 Spectrum192142 scans: 28890	251382	287640	119000	147394	77361.2	58581.1	83424.2	226695
5	Pavir.J03033.1	Pavir.J03033.1	15182	39537	712	712	16	16	64.9	336997	1	1	1	1183.12	2364.23	2	2364.23	-0.0016	0	57.89	19	30	9.5e-05	K	GIYPAVDPLDSTSTMLQPR	I			File845 Spectrum439503 scans: 20489	241868	202013	226035	175681	220734	205687	171969	168059
5	Pavir.J03033.1	Pavir.J03033.1	15182	39537	712	712	16	16	64.9	252126	1	1	1	961.509	1921	2	1921	-0.0005	0	36.34	15	29	0.011	K	VALVYGQMNEPPGAR	M	Oxidation (M)	0.000000030000000.0	File845 Spectrum432558 scans: 13081	233368	215003	167615	206893	188862	158459	118929	153372
5	Pavir.J03033.1	Pavir.J03033.1	15182	39537	712	712	16	16	64.9	252026	1	1	1	961.507	1921	2	1921	-0.0036	0	52.73	18	30	0.00027	K	VALVYGQMNEPPGAR	M	Oxidation (M)	0.000000030000000.0	File829 Spectrum59410 scans: 14085	230846	197927	181747	179227	159351	164473	131519	149000
5	Pavir.J03033.1	Pavir.J03033.1	15182	39537	712	712	16	16	64.9	247659	1	1	1	953.509	1905	2	1905.01	-0.0047	0	62.78	17	29	2.6e-05	K	VALVYGQMNEPPGAR	M			File828 Spectrum38114 scans: 17471	229281	212970	179573	151648	191138	168494	131738	145636
5	Pavir.J03033.1	Pavir.J03033.1	15182	39537	712	712	16	16	64.9	172843	1	1	1	547.975	1640.9	3	1640.91	-0.0055	0	36.1		29	0.01	K	AINLEEESK	L	Deamidated (NQ)	0.001000000.0	File829 Spectrum56544 scans: 11028	207220	157196	168352	151013	170467	151780	115713	150457
5	Pavir.J03033.1	Pavir.J03033.1	15182	39537	712	712	16	16	64.9	252091	1	1	1	961.508	1921	2	1921	-0.0016	0	52.85		29	0.00025	K	VALVYGQMNEPPGAR	M	Oxidation (M)	0.000000030000000.0	File829 Spectrum58857 scans: 13495	186452	198869	146358	157408	166127	166445	116276	135658
5	Pavir.J03033.1	Pavir.J03033.1	15182	39537	712	712	16	16	64.9	352510	1	1	1	1238.17	2474.32	2	2474.31	0.0109	0	78.98	22	31	8.3e-07	K	ELQDIIAILGLDELSEEDR	L			File829 Spectrum73265 scans: 28863	179551	285324	113256	214135	78945.4	77548	94201.3	235103
5	Pavir.J03033.1	Pavir.J03033.1	15182	39537	712	712	16	16	64.9	213360	1	1	1	888.486	1774.96	2	1774.96	-0.0016	0	43.88	25	30	0.0021	R	VGLTALTMAEYFR	D			File835 Spectrum217080 scans: 28119	177160	161179	55827.2	98571.4	35938.2	45537	48672.8	150233
5	Pavir.J03033.1	Pavir.J03033.1	15182	39537	712	712	16	16	64.9	252089	1	1	1	961.508	1921	2	1921	-0.0016	0	52.29	17	29	0.00028	K	VALVYGQMNEPPGAR	M	Oxidation (M)	0.000000030000000.0	File845 Spectrum432605 scans: 13131	172003	131062	131431	114739	138984	117892	81466.2	102842
5	Pavir.J03033.1	Pavir.J03033.1	15182	39537	712	712	16	16	64.9	202327	1	1	1	869.494	1736.97	2	1736.97	0.0008	0	63.86	23	29	1.7e-05	R	FVQAGSEVSALLGR	M			File831 Spectrum117640 scans: 25175	169434	184857	73236.6	126680	54212.2	49847.8	58294.5	134537
5	Pavir.J03033.1	Pavir.J03033.1	15182	39537	712	712	16	16	64.9	252095	1	1	1	961.508	1921	2	1921	-0.0015	0	46.48		29	0.0011	K	VALVYGQMNEPPGAR	M	Oxidation (M)	0.000000030000000.0	File829 Spectrum59455 scans: 14133	164633	148921	128326	133605	120419	115302	77423.6	126128
5	Pavir.J03033.1	Pavir.J03033.1	15182	39537	712	712	16	16	64.9	71011	1	1	1	663.387	1324.76	2	1324.77	-0.0064	0	30.74	20	27	0.022	K	YVGLAETIR	G			File842 Spectrum363489 scans: 14846	151359	155902	52283.9	213934	81763.8	60626.9	86580.9	303829
5	Pavir.J03033.1	Pavir.J03033.1	15182	39537	712	712	16	16	64.9	252080	1	1	1	961.508	1921	2	1921	-0.0017	0	51.89		29	0.00031	K	VALVYGQMNEPPGAR	M	Oxidation (M)	0.000000030000000.0	File846 Spectrum456468 scans: 12945	143705	148882	110207	118026	122653	96923.6	68295.3	79309.5
5	Pavir.J03033.1	Pavir.J03033.1	15182	39537	712	712	16	16	64.9	252145	1	1	1	961.509	1921	2	1921	0.0006	0	51.75		30	0.00034	K	VALVYGQMNEPPGAR	M	Oxidation (M)	0.000000030000000.0	File845 Spectrum432632 scans: 13160	140463	129085	96883.5	112739	127688	90806	75814.9	91709.3
5	Pavir.J03033.1	Pavir.J03033.1	15182	39537	712	712	16	16	64.9	252077	1	1	1	961.508	1921	2	1921	-0.0019	0	48.8		29	0.00065	K	VALVYGQMNEPPGAR	M	Oxidation (M)	0.000000030000000.0	File845 Spectrum431884 scans: 12362	137969	119807	93124.1	118494	115269	78834.1	75438.3	79107.7
5	Pavir.J03033.1	Pavir.J03033.1	15182	39537	712	712	16	16	64.9	252038	1	1	1	961.507	1921	2	1921	-0.0031	0	52.54	19	30	0.00028	K	VALVYGQMNEPPGAR	M	Oxidation (M)	0.000000030000000.0	File846 Spectrum456530 scans: 13011	134422	140195	100066	125446	101735	84224.7	64885.7	85980.3
5	Pavir.J03033.1	Pavir.J03033.1	15182	39537	712	712	16	16	64.9	247681	1	1	1	953.51	1905.01	2	1905.01	-0.0029	0	52	16	30	0.00033	K	VALVYGQMNEPPGAR	M			File828 Spectrum38189 scans: 17551	126413	118287	101812	123627	99272.9	97489	69013.3	87684.4
5	Pavir.J03033.1	Pavir.J03033.1	15182	39537	712	712	16	16	64.9	252096	1	1	1	961.508	1921	2	1921	-0.0015	0	57.65		29	8.2e-05	K	VALVYGQMNEPPGAR	M	Oxidation (M)	0.000000030000000.0	File829 Spectrum59501 scans: 14182	119812	120474	101321	96060.6	91239.6	99607.9	66226.4	82224.5
5	Pavir.J03033.1	Pavir.J03033.1	15182	39537	712	712	16	16	64.9	197229	1	1	1	574.302	1719.88	3	1719.88	-0.002	0	36.45	20	28	0.0079	R	IVGNEHYETAQR	V			File836 Spectrum220011 scans: 5865	117640	147830	76389.2	106489	105648	117336	66277.5	91978.4
5	Pavir.J03033.1	Pavir.J03033.1	15182	39537	712	712	16	16	64.9	197199	1	1	1	574.3	1719.88	3	1719.88	-0.0052	0	28.07	20	28	0.056	R	IVGNEHYETAQR	V			File833 Spectrum146934 scans: 6216	113597	127387	97181	98254.2	113390	102100	75946.1	79365.6
5	Pavir.J03033.1	Pavir.J03033.1	15182	39537	712	712	16	16	64.9	252087	1	1	1	961.508	1921	2	1921	-0.0016	0	51.87		29	0.00031	K	VALVYGQMNEPPGAR	M	Oxidation (M)	0.000000030000000.0	File846 Spectrum456423 scans: 12897	113365	101112	86907.2	90473.3	87297.1	55172.5	49141.9	54207.2
5	Pavir.J03033.1	Pavir.J03033.1	15182	39537	712	712	16	16	64.9	339135	1	1	1	1191.12	2380.22	2	2380.23	-0.0043	0	41.27	19	30	0.004	K	GIYPAVDPLDSTSTMLQPR	I	Oxidation (M)	0.0000000000000030000.0	File842 Spectrum365636 scans: 17136	111961	88161.9	86792.1	57605.1	82411.8	77671.9	61025.2	38634.5
5	Pavir.J03033.1	Pavir.J03033.1	15182	39537	712	712	16	16	64.9	247668	1	1	1	953.51	1905	2	1905.01	-0.0039	0	50.78	16	29	0.00041	K	VALVYGQMNEPPGAR	M			File828 Spectrum37861 scans: 17201	111035	119711	94705.8	74717.2	88043.4	87416.3	67520.9	66539.7
5	Pavir.J03033.1	Pavir.J03033.1	15182	39537	712	712	16	16	64.9	247711	1	1	1	953.511	1905.01	2	1905.01	-0.001	0	51.16		29	0.00038	K	VALVYGQMNEPPGAR	M			File829 Spectrum62905 scans: 17813	108166	119333	100943	96002.9	104522	93384.6	76265.2	84578.9
5	Pavir.J03033.1	Pavir.J03033.1	15182	39537	712	712	16	16	64.9	202281	1	1	1	869.491	1736.97	2	1736.97	-0.005	0	58.08	18	29	6.3e-05	R	FVQAGSEVSALLGR	M			File832 Spectrum140999 scans: 25105	102730	115246	47511.3	66912.4	35969.4	30787.8	35161.7	74253.2
5	Pavir.J03033.1	Pavir.J03033.1	15182	39537	712	712	16	16	64.9	252138	1	1	1	961.509	1921	2	1921	0.0001	0	55.23	19	30	0.00015	K	VALVYGQMNEPPGAR	M	Oxidation (M)	0.000000030000000.0	File845 Spectrum432696 scans: 13228	98234.5	99317.7	78394.2	87754.7	80599.5	76826.5	46900.5	55361.9
5	Pavir.J03033.1	Pavir.J03033.1	15182	39537	712	712	16	16	64.9	337018	1	1	1	1183.12	2364.23	2	2364.23	-0.0001	0	44.8	16	30	0.0019	K	GIYPAVDPLDSTSTMLQPR	I			File827 Spectrum16998 scans: 21266	92359	68603.5	61894.7	60256.9	62616	69991.4	59267.9	48780.8
5	Pavir.J03033.1	Pavir.J03033.1	15182	39537	712	712	16	16	64.9	252030	1	1	1	961.507	1921	2	1921	-0.0033	0	50.54	16	29	0.00044	K	VALVYGQMNEPPGAR	M	Oxidation (M)	0.000000030000000.0	File845 Spectrum431858 scans: 12334	91441.5	84170.7	63299.6	71184.6	66412.7	55615.6	44547.8	49532
5	Pavir.J03033.1	Pavir.J03033.1	15182	39537	712	712	16	16	64.9	217684	1	1	1	896.484	1790.95	2	1790.95	-0.0003	0	42.48	19	30	0.0028	R	VGLTALTMAEYFR	D	Oxidation (M)	0.0000000300000.0	File831 Spectrum114493 scans: 21818	85809.1	90129.2	43016.9	73990.7	27261.7	20583.1	26830.3	62873.6
5	Pavir.J03033.1	Pavir.J03033.1	15182	39537	712	712	16	16	64.9	252051	1	1	1	961.508	1921	2	1921	-0.0025	0	50.06		30	0.0005	K	VALVYGQMNEPPGAR	M	Oxidation (M)	0.000000030000000.0	File829 Spectrum59530 scans: 14213	85036.1	92277.1	83134.4	74270.6	78255.2	81932.6	59597.2	61214.3
5	Pavir.J03033.1	Pavir.J03033.1	15182	39537	712	712	16	16	64.9	247705	1	1	1	953.511	1905.01	2	1905.01	-0.0015	0	45.31		29	0.0015	K	VALVYGQMNEPPGAR	M			File829 Spectrum62934 scans: 17844	84661.5	77868.9	67746.9	66502.4	63922.5	64052	58452.8	62548.4
5	Pavir.J03033.1	Pavir.J03033.1	15182	39537	712	712	16	16	64.9	252090	1	1	1	961.508	1921	2	1921	-0.0016	0	63.23	19	29	2.3e-05	K	VALVYGQMNEPPGAR	M	Oxidation (M)	0.000000030000000.0	File845 Spectrum432754 scans: 13290	84322.8	77740.1	63163.8	63050.3	63910.4	50746.1	38888.9	44946.5
5	Pavir.J03033.1	Pavir.J03033.1	15182	39537	712	712	16	16	64.9	339179	1	1	1	1191.12	2380.23	2	2380.23	0.0001	0	37.14	18	30	0.01	K	GIYPAVDPLDSTSTMLQPR	I	Oxidation (M)	0.0000000000000030000.0	File845 Spectrum436652 scans: 17448	83705.6	68579.4	64595.5	56888.2	85738.6	74501.1	37062.4	63647.2
5	Pavir.J03033.1	Pavir.J03033.1	15182	39537	712	712	16	16	64.9	252074	1	1	1	961.508	1921	2	1921	-0.0019	0	58.77	17	29	6.5e-05	K	VALVYGQMNEPPGAR	M	Oxidation (M)	0.000000030000000.0	File846 Spectrum456603 scans: 13089	80028.4	80139.1	57127.4	80937	68621.5	51122.3	49748.6	49184.5
5	Pavir.J03033.1	Pavir.J03033.1	15182	39537	712	712	16	16	64.9	339130	1	1	1	1191.12	2380.22	2	2380.23	-0.0048	0	50.02	17	30	0.00053	K	GIYPAVDPLDSTSTMLQPR	I	Oxidation (M)	0.0000000000000030000.0	File842 Spectrum365695 scans: 17199	73859.8	50856.9	57345.1	57526	59947.6	43476.6	32381.1	41314
5	Pavir.J03033.1	Pavir.J03033.1	15182	39537	712	712	16	16	64.9	213357	1	1	1	888.486	1774.96	2	1774.96	-0.0024	0	52.92	24	29	0.00025	R	VGLTALTMAEYFR	D			File835 Spectrum216917 scans: 27945	67745.8	70041.8	27065	35795.5	15540.9	18675.2	21080.9	63299.6
5	Pavir.J03033.1	Pavir.J03033.1	15182	39537	712	712	16	16	64.9	197544	1	1	1	574.629	1720.87	3	1720.87	-0.0023	0	52.86	16	27	0.00015	R	IVGNEHYETAQR	V	Deamidated (NQ)	0.000100000000.0	File830 Spectrum77134 scans: 6969	67428	68769.1	47141.9	44511.1	46445.4	53526.9	37846.3	41829.8
5	Pavir.J03033.1	Pavir.J03033.1	15182	39537	712	712	16	16	64.9	339128	1	1	1	1191.12	2380.22	2	2380.23	-0.005	0	42.67	17	30	0.0029	K	GIYPAVDPLDSTSTMLQPR	I	Oxidation (M)	0.0000000000000030000.0	File842 Spectrum365455 scans: 16943	64941.1	70955	48226.4	59538.9	53410.5	46134.2	29575.6	38511.2
5	Pavir.J03033.1	Pavir.J03033.1	15182	39537	712	712	16	16	64.9	252052	1	1	1	961.508	1921	2	1921	-0.0025	0	47.64		30	0.00087	K	VALVYGQMNEPPGAR	M	Oxidation (M)	0.000000030000000.0	File846 Spectrum456633 scans: 13121	63670.3	66306.2	51027.8	56608.3	58722.1	46712.4	35677.9	33981.8
5	Pavir.J03033.1	Pavir.J03033.1	15182	39537	712	712	16	16	64.9	248056	1	1	1	954.003	1905.99	2	1905.99	-0.0021	0	55.86		29	0.00013	K	VALVYGQMNEPPGAR	M	Deamidated (NQ)	0.000000001000000.0	File844 Spectrum411754 scans: 16176	62506.9	58027	49573.8	44613.9	53913.5	46110.8	34376.6	39755.7
5	Pavir.J03033.1	Pavir.J03033.1	15182	39537	712	712	16	16	64.9	248073	1	1	1	954.003	1905.99	2	1905.99	-0.0008	0	66.85		29	9.8e-06	K	VALVYGQMNEPPGAR	M	Deamidated (NQ)	0.000000001000000.0	File844 Spectrum411728 scans: 16148	61624.8	58275.8	50321.7	46129.1	51039.9	49566	37368.1	43993.6
5	Pavir.J03033.1	Pavir.J03033.1	15182	39537	712	712	16	16	64.9	217669	1	1	1	896.482	1790.95	2	1790.95	-0.0038	0	46.95		29	0.001	R	VGLTALTMAEYFR	D	Oxidation (M)	0.0000000300000.0	File832 Spectrum138075 scans: 21986	60224.6	55725.3	26153.3	47507	18639.9	14542.1	18131	41515.8
5	Pavir.J03033.1	Pavir.J03033.1	15182	39537	712	712	16	16	64.9	247713	1	1	1	953.511	1905.01	2	1905.01	-0.0007	0	46.05		29	0.0012	K	VALVYGQMNEPPGAR	M			File830 Spectrum86643 scans: 17112	59581.6	60045	47780.1	48603.7	60165.8	47291	35397.6	47031.9
5	Pavir.J03033.1	Pavir.J03033.1	15182	39537	712	712	16	16	64.9	252129	1	1	1	961.509	1921	2	1921	-0.0003	0	62.92	18	29	2.5e-05	K	VALVYGQMNEPPGAR	M	Oxidation (M)	0.000000030000000.0	File845 Spectrum432844 scans: 13386	58463.8	47583.4	33138.4	43675.7	42616.9	34763.2	26222.3	28028.5
5	Pavir.J03033.1	Pavir.J03033.1	15182	39537	712	712	16	16	64.9	202289	1	1	1	869.492	1736.97	2	1736.97	-0.0039	0	38.13	20	29	0.0065	R	FVQAGSEVSALLGR	M			File829 Spectrum66616 scans: 21771	57651.7	49505.4	21443.4	33039.8	15457	14214.5	15419.5	37984.3
5	Pavir.J03033.1	Pavir.J03033.1	15182	39537	712	712	16	16	64.9	172593	1	1	1	820.965	1639.92	2	1639.92	-0.0084	0	40.67	24	29	0.004	K	AINLEEESK	L			File832 Spectrum126985 scans: 10155	57442	52582.2	47792.8	42507.2	44194.5	48870	35173.2	34811.4
5	Pavir.J03033.1	Pavir.J03033.1	15182	39537	712	712	16	16	64.9	197228	1	1	1	574.302	1719.88	3	1719.88	-0.0022	0	34.58	20	28	0.012	R	IVGNEHYETAQR	V			File833 Spectrum146756 scans: 6026	57265	73627.6	51134.9	55335.4	66535.2	57263.5	41952.3	52480.6
5	Pavir.J03033.1	Pavir.J03033.1	15182	39537	712	712	16	16	64.9	202295	1	1	1	869.492	1736.97	2	1736.97	-0.0032	0	66.25	22	29	9.9e-06	R	FVQAGSEVSALLGR	M			File829 Spectrum66589 scans: 21742	55092.7	50288.8	21220.8	30062.3	17861.5	15450.7	16359.3	33970.6
5	Pavir.J03033.1	Pavir.J03033.1	15182	39537	712	712	16	16	64.9	172627	1	1	1	820.967	1639.92	2	1639.92	-0.0043	0	47.3	27	29	0.00092	K	AINLEEESK	L			File831 Spectrum103887 scans: 10505	54821.8	40065.2	40314.5	37919.8	44917.9	35322.4	30662.4	33567
5	Pavir.J03033.1	Pavir.J03033.1	15182	39537	712	712	16	16	64.9	336965	1	1	1	1183.12	2364.23	2	2364.23	-0.004	0	50.28	19	30	0.00055	K	GIYPAVDPLDSTSTMLQPR	I			File846 Spectrum463834 scans: 20802	54660.7	43600.8	55751.9	43468.6	49573	47088.9	38485.9	39531.4
5	Pavir.J03033.1	Pavir.J03033.1	15182	39537	712	712	16	16	64.9	252108	1	1	1	961.508	1921	2	1921	-0.0011	0	62.78	17	29	2.6e-05	K	VALVYGQMNEPPGAR	M	Oxidation (M)	0.000000030000000.0	File846 Spectrum456666 scans: 13156	53785.5	56000.4	42667.8	44009.3	48991.3	42556.2	26997.8	32984
5	Pavir.J03033.1	Pavir.J03033.1	15182	39537	712	712	16	16	64.9	247693	1	1	1	953.51	1905.01	2	1905.01	-0.0021	0	67.38		30	9.3e-06	K	VALVYGQMNEPPGAR	M			File830 Spectrum86541 scans: 17003	53598.1	66621.3	49673.3	45420.9	48355	51924.8	38564.7	44016
5	Pavir.J03033.1	Pavir.J03033.1	15182	39537	712	712	16	16	64.9	197224	1	1	1	860.948	1719.88	2	1719.88	-0.0025	0	45.95	27	28	0.00085	R	IVGNEHYETAQR	V			File833 Spectrum146788 scans: 6060	50763.2	66368.6	42474.2	44560.2	50261	41258.2	29022	32154.3
5	Pavir.J03033.1	Pavir.J03033.1	15182	39537	712	712	16	16	64.9	172852	1	1	1	821.459	1640.9	2	1640.91	-0.0045	0	51.98	27	29	0.00028	K	AINLEEESK	L	Deamidated (NQ)	0.001000000.0	File829 Spectrum56580 scans: 11066	50002.9	29424.4	36138.8	30826.4	41799.7	34532.9	28613	26997.1
5	Pavir.J03033.1	Pavir.J03033.1	15182	39537	712	712	16	16	64.9	252158	1	1	1	961.51	1921.01	2	1921	0.0018	0	55.6		29	0.00014	K	VALVYGQMNEPPGAR	M	Oxidation (M)	0.000000030000000.0	File829 Spectrum59620 scans: 14309	49890.2	46820.8	46899.4	41788.2	45453.2	40198.7	32018.3	33488.5
5	Pavir.J03033.1	Pavir.J03033.1	15182	39537	712	712	16	16	64.9	252134	1	1	1	961.509	1921	2	1921	-0.0001	0	54.49	17	29	0.00018	K	VALVYGQMNEPPGAR	M	Oxidation (M)	0.000000030000000.0	File845 Spectrum432874 scans: 13418	49055.9	49762.3	33533.4	38991.9	44649	32917.9	23765.7	27400.7
5	Pavir.J03033.1	Pavir.J03033.1	15182	39537	712	712	16	16	64.9	202314	1	1	1	869.493	1736.97	2	1736.97	-0.0005	0	63.19	23	29	2.1e-05	R	FVQAGSEVSALLGR	M			File829 Spectrum66637 scans: 21793	48966.3	42725.3	22242.4	31062.5	15837.7	13215.5	13804.3	29351.5
5	Pavir.J03033.1	Pavir.J03033.1	15182	39537	712	712	16	16	64.9	202320	1	1	1	869.494	1736.97	2	1736.97	0.0001	0	67.06	24	29	8.5e-06	R	FVQAGSEVSALLGR	M			File831 Spectrum118059 scans: 25622	47920.6	46282.4	21714.6	29403.7	14877.7	14337.7	16770.4	33780
5	Pavir.J03033.1	Pavir.J03033.1	15182	39537	712	712	16	16	64.9	172606	1	1	1	547.647	1639.92	3	1639.92	-0.0062	0	41.41	23	29	0.0034	K	AINLEEESK	L			File833 Spectrum150805 scans: 10345	47870.4	43215	35954.5	33596.4	41120.5	44702.4	32730.8	38970.9
5	Pavir.J03033.1	Pavir.J03033.1	15182	39537	712	712	16	16	64.9	247656	1	1	1	953.509	1905	2	1905.01	-0.0052	0	62.15		29	3e-05	K	VALVYGQMNEPPGAR	M			File828 Spectrum38280 scans: 17648	46993	50483.4	40043.4	35516.3	40775.3	38494.4	26769.2	30988.3
5	Pavir.J03033.1	Pavir.J03033.1	15182	39537	712	712	16	16	64.9	197219	1	1	1	574.301	1719.88	3	1719.88	-0.0027	0	43.02	28	28	0.0016	R	IVGNEHYETAQR	V			File841 Spectrum331747 scans: 5519	46396.2	422537	133557	197259	49463.6	38812.6	16413.3	88301.1
5	Pavir.J03033.1	Pavir.J03033.1	15182	39537	712	712	16	16	64.9	219344	1	1	1	899.013	1796.01	2	1796.01	-0.0031	0	55.64	28	30	0.00014	K	QDVLLFIDNIFR	F			File834 Spectrum193412 scans: 30244	44821.5	59721.3	15600.8	36723.5	6053.04	7163.3	12227.3	42715.5
5	Pavir.J03033.1	Pavir.J03033.1	15182	39537	712	712	16	16	64.9	202307	1	1	1	869.493	1736.97	2	1736.97	-0.0015	0	68.65	23	29	5.9e-06	R	FVQAGSEVSALLGR	M			File829 Spectrum66652 scans: 21809	44609.6	39096.5	17532.5	26765.8	12963.4	8883.95	11915.1	30764.1
5	Pavir.J03033.1	Pavir.J03033.1	15182	39537	712	712	16	16	64.9	202286	1	1	1	869.492	1736.97	2	1736.97	-0.0042	0	62.29	22	29	2.5e-05	R	FVQAGSEVSALLGR	M			File829 Spectrum66577 scans: 21729	43122.7	45709.8	18656.8	25878.1	14591.1	11723.7	14619.1	31369.5
5	Pavir.J03033.1	Pavir.J03033.1	15182	39537	712	712	16	16	64.9	202323	1	1	1	869.494	1736.97	2	1736.97	0.0002	0	66.39	24	29	9.9e-06	R	FVQAGSEVSALLGR	M			File830 Spectrum93782 scans: 24727	41935	40755.4	18702.1	30935	13305.9	11976.2	12846.7	30382.9
5	Pavir.J03033.1	Pavir.J03033.1	15182	39537	712	712	16	16	64.9	339180	1	1	1	1191.12	2380.23	2	2380.23	0.0001	0	34.52	17	30	0.019	K	GIYPAVDPLDSTSTMLQPR	I	Oxidation (M)	0.0000000000000030000.0	File841 Spectrum343434 scans: 17985	41513.6	25021.3	22611.1	28234.3	21864.3	26378.5	17462.8	17388.9
5	Pavir.J03033.1	Pavir.J03033.1	15182	39537	712	712	16	16	64.9	368313	1	1	1	868.097	2601.27	3	2601.27	-0.0037	0	32.41	16	29	0.027	R	MPSAVGYQPTLSTEMGSLQER	I	Oxidation (M)	0.000000000000003000000.0	File841 Spectrum340027 scans: 14351	40944.6	53513.5	15961.3	46114	41701.7	41084.8	38670	40035.9
5	Pavir.J03033.1	Pavir.J03033.1	15182	39537	712	712	16	16	64.9	247722	1	1	1	636.01	1905.01	3	1905.01	0.0001	0	32.11		30	0.031	K	VALVYGQMNEPPGAR	M			File827 Spectrum7371 scans: 10997	39655.2	39039.5	39117.2	48431.8	43924.3	42051.2	27197.1	38858.7
5	Pavir.J03033.1	Pavir.J03033.1	15182	39537	712	712	16	16	64.9	247721	1	1	1	636.01	1905.01	3	1905.01	-0.0001	0	44.89		29	0.0016	K	VALVYGQMNEPPGAR	M			File827 Spectrum7293 scans: 10914	39082.1	47876.1	41188.9	44534.3	41128.6	32885.3	39596.6	34968.4
5	Pavir.J03033.1	Pavir.J03033.1	15182	39537	712	712	16	16	64.9	202292	1	1	1	869.492	1736.97	2	1736.97	-0.0036	0	67.43	19	29	7.5e-06	R	FVQAGSEVSALLGR	M			File829 Spectrum66665 scans: 21823	39052.8	34189	18132.7	24276.7	13090.7	11006.3	11749.9	26268.3
5	Pavir.J03033.1	Pavir.J03033.1	15182	39537	712	712	16	16	64.9	197546	1	1	1	574.63	1720.87	3	1720.87	-0.0016	0	56.7	17	27	6.4e-05	R	IVGNEHYETAQR	V	Deamidated (NQ)	0.000100000000.0	File831 Spectrum100764 scans: 7174	37465.1	54720.5	30717.8	26458.5	31172.8	26120.7	17789.3	24362.4
5	Pavir.J03033.1	Pavir.J03033.1	15182	39537	712	712	16	16	64.9	172616	1	1	1	547.647	1639.92	3	1639.92	-0.0051	0	43.72	24	30	0.0021	K	AINLEEESK	L			File831 Spectrum103959 scans: 10582	36846.7	26537.7	24197.4	28560.6	35078.2	30951	22154	25741.4
5	Pavir.J03033.1	Pavir.J03033.1	15182	39537	712	712	16	16	64.9	247664	1	1	1	953.51	1905	2	1905.01	-0.0041	0	58.39		29	7e-05	K	VALVYGQMNEPPGAR	M			File828 Spectrum37818 scans: 17155	35806.8	40762	33436.6	31089.1	37528.6	33537.5	26301.9	24855.7
5	Pavir.J03033.1	Pavir.J03033.1	15182	39537	712	712	16	16	64.9	172848	1	1	1	547.975	1640.9	3	1640.91	-0.0049	0	41.25	26	29	0.0034	K	AINLEEESK	L	Deamidated (NQ)	0.001000000.0	File831 Spectrum103104 scans: 9670	34764.2	27936.3	30108.1	24062.5	28226.5	29811.3	21926.8	22647
5	Pavir.J03033.1	Pavir.J03033.1	15182	39537	712	712	16	16	64.9	197543	1	1	1	574.629	1720.87	3	1720.87	-0.0025	0	47.94	16	27	0.00046	R	IVGNEHYETAQR	V	Deamidated (NQ)	0.000100000000.0	File831 Spectrum100842 scans: 7257	34136.6	56556.4	23397.1	27928	36091.7	27448.3	23749	28891.8
5	Pavir.J03033.1	Pavir.J03033.1	15182	39537	712	712	16	16	64.9	217667	1	1	1	896.482	1790.95	2	1790.95	-0.0044	0	43.83	15	29	0.002	R	VGLTALTMAEYFR	D	Oxidation (M)	0.0000000300000.0	File833 Spectrum162287 scans: 22592	34106.8	31280.1	13031	24137.7	11111.4	8262.89	11089.7	21088.7
5	Pavir.J03033.1	Pavir.J03033.1	15182	39537	712	712	16	16	64.9	248041	1	1	1	954.002	1905.99	2	1905.99	-0.0036	0	59.81		29	5.1e-05	K	VALVYGQMNEPPGAR	M	Deamidated (NQ)	0.000000001000000.0	File844 Spectrum411641 scans: 16055	33931.8	29730.9	30402.3	28014.1	33246.1	26916.2	24285.1	25046.3
5	Pavir.J03033.1	Pavir.J03033.1	15182	39537	712	712	16	16	64.9	252110	1	1	1	961.509	1921	2	1921	-0.0009	0	51.64		29	0.00034	K	VALVYGQMNEPPGAR	M	Oxidation (M)	0.000000030000000.0	File846 Spectrum456776 scans: 13273	33169.9	30732.7	23681.3	26543	25943.8	19715.3	16304.3	16447.1
5	Pavir.J03033.1	Pavir.J03033.1	15182	39537	712	712	16	16	64.9	252373	1	1	1	961.999	1921.98	2	1921.99	-0.0034	0	66.94	18	29	9.5e-06	K	VALVYGQMNEPPGAR	M	Deamidated (NQ); Oxidation (M)	0.000000031000000.0	File842 Spectrum361594 scans: 12824	32903.9	30941.3	23628.2	22988.7	23418.2	20773.6	19201.4	20203
5	Pavir.J03033.1	Pavir.J03033.1	15182	39537	712	712	16	16	64.9	248086	1	1	1	954.004	1905.99	2	1905.99	0.0008	0	60.18		29	4.7e-05	K	VALVYGQMNEPPGAR	M	Deamidated (NQ)	0.000000001000000.0	File845 Spectrum436304 scans: 17076	32800.3	33988.6	28649.5	25691.6	31146.6	30379.6	22025.7	26044.1
5	Pavir.J03033.1	Pavir.J03033.1	15182	39537	712	712	16	16	64.9	252374	1	1	1	961.999	1921.98	2	1921.99	-0.0033	0	63.98		29	1.9e-05	K	VALVYGQMNEPPGAR	M	Deamidated (NQ); Oxidation (M)	0.000000031000000.0	File842 Spectrum361443 scans: 12663	32456.8	40538.1	24204.4	25649.7	26628.2	19525	18913.1	16503.2
5	Pavir.J03033.1	Pavir.J03033.1	15182	39537	712	712	16	16	64.9	197231	1	1	1	574.302	1719.88	3	1719.88	-0.001	0	40.64	26	28	0.0031	R	IVGNEHYETAQR	V			File836 Spectrum219926 scans: 5774	32377	52076.3	24763.8	24235.5	23861.2	28538.1	15997	19171.5
5	Pavir.J03033.1	Pavir.J03033.1	15182	39537	712	712	16	16	64.9	172841	1	1	1	547.975	1640.9	3	1640.91	-0.006	0	32.79	29	29	0.023	K	AINLEEESK	L	Deamidated (NQ)	0.001000000.0	File831 Spectrum103136 scans: 9704	32360.9	27420.8	37250.7	23792.9	31542	27401.2	22089.4	24037.3
5	Pavir.J03033.1	Pavir.J03033.1	15182	39537	712	712	16	16	64.9	252063	1	1	1	961.508	1921	2	1921	-0.0022	0	45.51		30	0.0014	K	VALVYGQMNEPPGAR	M	Oxidation (M)	0.000000030000000.0	File846 Spectrum456757 scans: 13253	31920.6	24865	22779.9	21960.5	27028.9	19853.7	20014.6	17243.1
5	Pavir.J03033.1	Pavir.J03033.1	15182	39537	712	712	16	16	64.9	202321	1	1	1	869.494	1736.97	2	1736.97	0.0001	0	67.52	24	29	7.6e-06	R	FVQAGSEVSALLGR	M			File830 Spectrum94011 scans: 24971	31855.7	26953.6	14136.1	22400.4	9695.93	10396.6	9450	19889
5	Pavir.J03033.1	Pavir.J03033.1	15182	39537	712	712	16	16	64.9	172847	1	1	1	547.975	1640.9	3	1640.91	-0.0049	0	41.59		29	0.0031	K	AINLEEESK	L	Deamidated (NQ)	0.001000000.0	File828 Spectrum31607 scans: 10530	31713.9	32633.3	26923.6	22459.1	27383.2	19496.2	15625.9	18016.7
5	Pavir.J03033.1	Pavir.J03033.1	15182	39537	712	712	16	16	64.9	202657	1	1	1	869.985	1737.96	2	1737.96	-0.0006	0	66.3	22	29	9.9e-06	R	FVQAGSEVSALLGR	M	Deamidated (NQ)	0.00100000000000.0	File827 Spectrum21853 scans: 26444	31641.1	27831.7	11272.6	19167	10863.2	9146.9	11864.7	20505.7
5	Pavir.J03033.1	Pavir.J03033.1	15182	39537	712	712	16	16	64.9	248060	1	1	1	954.003	1905.99	2	1905.99	-0.0017	0	58.8		29	6.3e-05	K	VALVYGQMNEPPGAR	M	Deamidated (NQ)	0.000000001000000.0	File845 Spectrum436275 scans: 17045	31478.7	35075.8	25968.2	26827.4	22670.7	25008.5	18791.5	21088.7
5	Pavir.J03033.1	Pavir.J03033.1	15182	39537	712	712	16	16	64.9	252117	1	1	1	961.509	1921	2	1921	-0.0008	0	51.72		29	0.00033	K	VALVYGQMNEPPGAR	M	Oxidation (M)	0.000000030000000.0	File846 Spectrum456342 scans: 12810	31234.7	30515.8	20815.3	25294.8	23889.1	22430	14439.4	15113
5	Pavir.J03033.1	Pavir.J03033.1	15182	39537	712	712	16	16	64.9	252377	1	1	1	962	1921.99	2	1921.99	-0.002	0	57.31	20	29	8.8e-05	K	VALVYGQMNEPPGAR	M	Deamidated (NQ); Oxidation (M)	0.000000031000000.0	File842 Spectrum361531 scans: 12757	30658.4	31718.7	25229.5	23576.2	23427.8	19392.7	14941.1	20584.1
5	Pavir.J03033.1	Pavir.J03033.1	15182	39537	712	712	16	16	64.9	202300	1	1	1	869.493	1736.97	2	1736.97	-0.0022	0	67.41	22	29	7.3e-06	R	FVQAGSEVSALLGR	M			File829 Spectrum66683 scans: 21842	30623.8	24488.3	13365.6	17544.3	7968.05	8166.85	7264.45	18498.8
5	Pavir.J03033.1	Pavir.J03033.1	15182	39537	712	712	16	16	64.9	339149	1	1	1	794.415	2380.22	3	2380.23	-0.0028	0	31.09	19	30	0.041	K	GIYPAVDPLDSTSTMLQPR	I	Oxidation (M)	0.0000000000000030000.0	File842 Spectrum365381 scans: 16864	30264.8	21338.7	17552.2	20895.3	11066.7	14171.6	12561.9	13117.3
5	Pavir.J03033.1	Pavir.J03033.1	15182	39537	712	712	16	16	64.9	252380	1	1	1	962	1921.99	2	1921.99	-0.0011	0	63.29		29	2.2e-05	K	VALVYGQMNEPPGAR	M	Deamidated (NQ); Oxidation (M)	0.000000031000000.0	File842 Spectrum361383 scans: 12599	30188.5	29043	25174.5	23422.3	24977.3	21285.2	17866.6	17702.8
5	Pavir.J03033.1	Pavir.J03033.1	15182	39537	712	712	16	16	64.9	197235	1	1	1	574.302	1719.89	3	1719.88	0.0006	0	28.98	20	28	0.044	R	IVGNEHYETAQR	V			File834 Spectrum170618 scans: 5931	29435.5	40784.4	24817.2	29421.7	24781.9	26833.1	22700.3	20629
5	Pavir.J03033.1	Pavir.J03033.1	15182	39537	712	712	16	16	64.9	252379	1	1	1	962	1921.99	2	1921.99	-0.0015	0	63.5		29	2e-05	K	VALVYGQMNEPPGAR	M	Deamidated (NQ); Oxidation (M)	0.000000031000000.0	File842 Spectrum361400 scans: 12617	28945.4	28690.9	20845.5	26678.7	24421.1	21756.3	13867.5	17814.9
5	Pavir.J03033.1	Pavir.J03033.1	15182	39537	712	712	16	16	64.9	213358	1	1	1	592.66	1774.96	3	1774.96	-0.0019	0	53.94		30	0.00021	R	VGLTALTMAEYFR	D			File834 Spectrum192128 scans: 28875	28784.4	20264.8	6705.62	8365.14	11017	11019.8	10701.9	14731.8
5	Pavir.J03033.1	Pavir.J03033.1	15182	39537	712	712	16	16	64.9	197207	1	1	1	574.301	1719.88	3	1719.88	-0.004	0	48.32		28	0.0005	R	IVGNEHYETAQR	V			File838 Spectrum264412 scans: 5896	28546.6	38782	25024	24876.1	25623.4	33610.4	16132.6	23936.4
5	Pavir.J03033.1	Pavir.J03033.1	15182	39537	712	712	16	16	64.9	252364	1	1	1	961.998	1921.98	2	1921.99	-0.0055	0	59.17		29	5.4e-05	K	VALVYGQMNEPPGAR	M	Deamidated (NQ); Oxidation (M)	0.000000031000000.0	File842 Spectrum361687 scans: 12923	28443.2	29426.4	19465.7	19187.9	21297.3	17220.4	14814.4	15426.9
5	Pavir.J03033.1	Pavir.J03033.1	15182	39537	712	712	16	16	64.9	252104	1	1	1	961.508	1921	2	1921	-0.0013	0	56.83		29	0.0001	K	VALVYGQMNEPPGAR	M	Oxidation (M)	0.000000030000000.0	File829 Spectrum58776 scans: 13408	28354.6	37192.1	24085.8	25372.3	22453	23698.1	17021.4	18050.4
5	Pavir.J03033.1	Pavir.J03033.1	15182	39537	712	712	16	16	64.9	248082	1	1	1	954.004	1905.99	2	1905.99	0.0001	0	63.05	18	29	2.4e-05	K	VALVYGQMNEPPGAR	M	Deamidated (NQ)	0.000000001000000.0	File844 Spectrum411853 scans: 16281	28109.2	22635.5	18722.8	23096.7	17797.9	21665.6	18458.5	15953.8
5	Pavir.J03033.1	Pavir.J03033.1	15182	39537	712	712	16	16	64.9	252381	1	1	1	962	1921.99	2	1921.99	-0.0009	0	63.35		29	2.2e-05	K	VALVYGQMNEPPGAR	M	Deamidated (NQ); Oxidation (M)	0.000000031000000.0	File842 Spectrum361354 scans: 12568	27506.9	22192.9	18615.1	21629.1	19027.2	17611.1	12984.6	14574.8
5	Pavir.J03033.1	Pavir.J03033.1	15182	39537	712	712	16	16	64.9	368349	1	1	1	868.098	2601.27	3	2601.27	0.0012	0	31.95		29	0.031	R	MPSAVGYQPTLSTEMGSLQER	I	Oxidation (M)	0.000000000000003000000.0	File840 Spectrum316420 scans: 14094	27332.3	27852.3	17714	14859.4	16060.3	18161.3	9336.01	17669.2
5	Pavir.J03033.1	Pavir.J03033.1	15182	39537	712	712	16	16	64.9	248055	1	1	1	954.003	1905.99	2	1905.99	-0.0021	0	66.26	17	29	1.2e-05	K	VALVYGQMNEPPGAR	M	Deamidated (NQ)	0.000000001000000.0	File845 Spectrum436255 scans: 17024	27214.7	24618.5	26624.9	24319.9	20225.7	24077.6	16085	21716.5
5	Pavir.J03033.1	Pavir.J03033.1	15182	39537	712	712	16	16	64.9	202328	1	1	1	869.494	1736.97	2	1736.97	0.0009	0	50.99	24	29	0.00033	R	FVQAGSEVSALLGR	M			File831 Spectrum118089 scans: 25654	27097.1	25329.5	11581.8	19324.1	9352.62	8076.25	9101.63	18779.1
5	Pavir.J03033.1	Pavir.J03033.1	15182	39537	712	712	16	16	64.9	252376	1	1	1	962	1921.99	2	1921.99	-0.0021	0	66.82		29	9.9e-06	K	VALVYGQMNEPPGAR	M	Deamidated (NQ); Oxidation (M)	0.000000031000000.0	File842 Spectrum361670 scans: 12905	26351.7	23921.3	22378.7	23681.6	20385.2	17476.4	13741.3	18207.3
5	Pavir.J03033.1	Pavir.J03033.1	15182	39537	712	712	16	16	64.9	172640	1	1	1	820.969	1639.92	2	1639.92	-0.0011	0	43.96	25	29	0.002	K	AINLEEESK	L			File831 Spectrum103917 scans: 10537	26190.8	20354.3	20557.9	18538.1	24022.5	21613.8	17543.9	16794.7
5	Pavir.J03033.1	Pavir.J03033.1	15182	39537	712	712	16	16	64.9	247712	1	1	1	953.511	1905.01	2	1905.01	-0.0008	0	37.19	18	29	0.0094	K	VALVYGQMNEPPGAR	M			File830 Spectrum86739 scans: 17214	26024.3	25911.1	24605.7	19590.8	23224.7	18892.9	16335.5	18599.7
5	Pavir.J03033.1	Pavir.J03033.1	15182	39537	712	712	16	16	64.9	252053	1	1	1	961.508	1921	2	1921	-0.0025	0	50.23		30	0.00048	K	VALVYGQMNEPPGAR	M	Oxidation (M)	0.000000030000000.0	File845 Spectrum432968 scans: 13518	25567.9	24254.5	18653.1	21913.3	23378.6	17101.4	13345.1	14429.1
5	Pavir.J03033.1	Pavir.J03033.1	15182	39537	712	712	16	16	64.9	172605	1	1	1	820.966	1639.92	2	1639.92	-0.0064	0	38.48	22	29	0.0066	K	AINLEEESK	L			File833 Spectrum150741 scans: 10276	25062	25903.8	21678	20133.6	24647	20289	16498.5	18128.8
5	Pavir.J03033.1	Pavir.J03033.1	15182	39537	712	712	16	16	64.9	337048	1	1	1	1183.12	2364.23	2	2364.23	0.0033	0	30.98	17	30	0.047	K	GIYPAVDPLDSTSTMLQPR	I			File827 Spectrum17062 scans: 21334	25056.8	14040.9	13958.2	17761.5	21175.1	11831.9	13822.1	7124.85
5	Pavir.J03033.1	Pavir.J03033.1	15182	39537	712	712	16	16	64.9	172844	1	1	1	547.975	1640.9	3	1640.91	-0.0055	0	36.91	27	29	0.0085	K	AINLEEESK	L	Deamidated (NQ)	0.001000000.0	File828 Spectrum31668 scans: 10595	24970.7	25260.1	21185.1	20657.4	17066.4	17668.6	16988.7	16133.2
5	Pavir.J03033.1	Pavir.J03033.1	15182	39537	712	712	16	16	64.9	172631	1	1	1	547.647	1639.92	3	1639.92	-0.004	0	43.04	24	29	0.0024	K	AINLEEESK	L			File834 Spectrum174300 scans: 9858	24961.9	25978.7	20246.9	21416.3	17977.2	18545	15607.9	16267.8
5	Pavir.J03033.1	Pavir.J03033.1	15182	39537	712	712	16	16	64.9	217680	1	1	1	896.484	1790.95	2	1790.95	-0.0011	0	38.17		30	0.0077	R	VGLTALTMAEYFR	D	Oxidation (M)	0.0000000300000.0	File833 Spectrum162330 scans: 22638	24956.9	22889.3	11786.1	18889.3	7469.95	5891.86	6909.12	14406.7
5	Pavir.J03033.1	Pavir.J03033.1	15182	39537	712	712	16	16	64.9	247731	1	1	1	953.513	1905.01	2	1905.01	0.0022	0	52.11		29	0.0003	K	VALVYGQMNEPPGAR	M			File830 Spectrum86456 scans: 16912	24910.2	24349	19028.7	20890.5	19325.1	23190.7	14413.9	16144.4
5	Pavir.J03033.1	Pavir.J03033.1	15182	39537	712	712	16	16	64.9	252116	1	1	1	961.509	1921	2	1921	-0.0008	0	48.01		29	0.00077	K	VALVYGQMNEPPGAR	M	Oxidation (M)	0.000000030000000.0	File829 Spectrum59712 scans: 14407	24648.6	24587.6	23680.3	21536.9	22360.5	23053.4	17396.1	18173.7
5	Pavir.J03033.1	Pavir.J03033.1	15182	39537	712	712	16	16	64.9	252027	1	1	1	641.341	1921	3	1921	-0.0035	0	46.65	21	30	0.0011	K	VALVYGQMNEPPGAR	M	Oxidation (M)	0.000000030000000.0	File846 Spectrum456771 scans: 13268	24273.6	27669.7	10072.5	14756.6	19097	13052	6092.21	6652.85
5	Pavir.J03033.1	Pavir.J03033.1	15182	39537	712	712	16	16	64.9	248078	1	1	1	954.003	1905.99	2	1905.99	-0.0003	0	59.01		29	6e-05	K	VALVYGQMNEPPGAR	M	Deamidated (NQ)	0.000000001000000.0	File845 Spectrum436062 scans: 16818	23883.3	21381.9	16417.5	19304.3	18420.2	19687	12250.2	16323.8
5	Pavir.J03033.1	Pavir.J03033.1	15182	39537	712	712	16	16	64.9	336980	1	1	1	1183.12	2364.23	2	2364.23	-0.0026	0	36.69	18	30	0.012	K	GIYPAVDPLDSTSTMLQPR	I			File845 Spectrum439968 scans: 20985	23657.8	22514.4	26379.6	22690.8	23727.7	18042.9	17472.4	17557.1
5	Pavir.J03033.1	Pavir.J03033.1	15182	39537	712	712	16	16	64.9	172595	1	1	1	820.965	1639.92	2	1639.92	-0.0082	0	40.4	25	29	0.0042	K	AINLEEESK	L			File832 Spectrum127172 scans: 10355	23482.2	20824.4	17043.4	17332.2	18865.8	16329.3	13688.7	15449.3
5	Pavir.J03033.1	Pavir.J03033.1	15182	39537	712	712	16	16	64.9	247725	1	1	1	636.01	1905.01	3	1905.01	0.0004	0	38.07		30	0.0079	K	VALVYGQMNEPPGAR	M			File827 Spectrum7461 scans: 11093	23366.4	23186.6	25039.2	25649.4	27852.5	24927.1	22317	22187.4
5	Pavir.J03033.1	Pavir.J03033.1	15182	39537	712	712	16	16	64.9	248092	1	1	1	954.004	1905.99	2	1905.99	0.0014	0	35.23		29	0.014	K	VALVYGQMNEPPGAR	M	Deamidated (NQ)	0.000000001000000.0	File845 Spectrum436081 scans: 16838	23305	26143.9	18165.1	20550.3	20169.9	17373.8	12948.9	15527.8
5	Pavir.J03033.1	Pavir.J03033.1	15182	39537	712	712	16	16	64.9	252148	1	1	1	961.509	1921	2	1921	0.0006	0	49.36		30	0.00059	K	VALVYGQMNEPPGAR	M	Oxidation (M)	0.000000030000000.0	File828 Spectrum34509 scans: 13625	22856.6	24441.9	19025	19639.1	19503.3	17066.8	13181.2	15651.1
5	Pavir.J03033.1	Pavir.J03033.1	15182	39537	712	712	16	16	64.9	172643	1	1	1	820.97	1639.93	2	1639.92	0.0012	0	49.02	28	29	0.00061	K	AINLEEESK	L			File831 Spectrum103936 scans: 10557	22721.7	18869.7	18692	18527.3	21439.1	17062.8	12707.9	15673.5
5	Pavir.J03033.1	Pavir.J03033.1	15182	39537	712	712	16	16	64.9	172619	1	1	1	547.647	1639.92	3	1639.92	-0.0049	0	42.08	23	30	0.0031	K	AINLEEESK	L			File831 Spectrum104004 scans: 10630	22639.1	18494	20277.7	20576.5	18969.6	16927	15887.8	14283.3
5	Pavir.J03033.1	Pavir.J03033.1	15182	39537	712	712	16	16	64.9	197542	1	1	1	574.629	1720.87	3	1720.87	-0.0027	0	50.19	16	27	0.00027	R	IVGNEHYETAQR	V	Deamidated (NQ)	0.000100000000.0	File831 Spectrum100368 scans: 6751	22537.1	30332.1	19986.1	18003.8	17506.3	21111.9	15150.3	15000.9
5	Pavir.J03033.1	Pavir.J03033.1	15182	39537	712	712	16	16	64.9	248077	1	1	1	954.003	1905.99	2	1905.99	-0.0003	0	66.96		29	9.7e-06	K	VALVYGQMNEPPGAR	M	Deamidated (NQ)	0.000000001000000.0	File844 Spectrum411866 scans: 16295	22384.2	21594.9	15822.3	15804.7	20306.1	18160.4	12305	13162.2
5	Pavir.J03033.1	Pavir.J03033.1	15182	39537	712	712	16	16	64.9	247637	1	1	1	953.508	1905	2	1905.01	-0.0079	0	51.13		29	0.00036	K	VALVYGQMNEPPGAR	M			File832 Spectrum133716 scans: 17335	22324.7	20817.2	20383.2	19377.5	19452.2	14634.6	11960	15763.2
5	Pavir.J03033.1	Pavir.J03033.1	15182	39537	712	712	16	16	64.9	252130	1	1	1	961.509	1921	2	1921	-0.0003	0	61.41		29	3.6e-05	K	VALVYGQMNEPPGAR	M	Oxidation (M)	0.000000030000000.0	File828 Spectrum34533 scans: 13651	22319.4	22115.1	18001.7	17374.3	18002.8	18321.8	12868	12545.6
5	Pavir.J03033.1	Pavir.J03033.1	15182	39537	712	712	16	16	64.9	252092	1	1	1	641.341	1921	3	1921	-0.0015	0	46.72	19	29	0.001	K	VALVYGQMNEPPGAR	M	Oxidation (M)	0.000000030000000.0	File829 Spectrum59635 scans: 14325	22298.6	32446	24725.5	30167.8	22160.4	24050.1	18646	30809
5	Pavir.J03033.1	Pavir.J03033.1	15182	39537	712	712	16	16	64.9	197547	1	1	1	574.63	1720.87	3	1720.87	-0.0016	0	51.69	18	27	0.0002	R	IVGNEHYETAQR	V	Deamidated (NQ)	0.000100000000.0	File830 Spectrum77386 scans: 7237	22257.8	29294.8	20112.6	20346	17362.7	18182.2	12975.3	15180.2
5	Pavir.J03033.1	Pavir.J03033.1	15182	39537	712	712	16	16	64.9	252076	1	1	1	961.508	1921	2	1921	-0.0019	0	54.62	17	29	0.00017	K	VALVYGQMNEPPGAR	M	Oxidation (M)	0.000000030000000.0	File846 Spectrum456807 scans: 13306	21865.1	22528	16291.2	20270.8	17940.1	17105.5	12945.2	14922.4
5	Pavir.J03033.1	Pavir.J03033.1	15182	39537	712	712	16	16	64.9	172604	1	1	1	820.966	1639.92	2	1639.92	-0.0066	0	46.91	27	29	0.00095	K	AINLEEESK	L			File833 Spectrum150803 scans: 10342	21611.5	21044.5	16582.6	16930.9	19139.1	16368.5	15193.4	14686.9
5	Pavir.J03033.1	Pavir.J03033.1	15182	39537	712	712	16	16	64.9	247685	1	1	1	953.51	1905.01	2	1905.01	-0.0027	0	48.38		30	0.00075	K	VALVYGQMNEPPGAR	M			File829 Spectrum63004 scans: 17918	21407.2	20360.9	17095.3	14480.6	18254.5	15868.3	10958.1	15539
5	Pavir.J03033.1	Pavir.J03033.1	15182	39537	712	712	16	16	64.9	252111	1	1	1	961.509	1921	2	1921	-0.0009	0	44.49		29	0.0017	K	VALVYGQMNEPPGAR	M	Oxidation (M)	0.000000030000000.0	File845 Spectrum433057 scans: 13613	21401.1	19319.4	16013.3	16299.8	14868.1	11123.3	9397.12	10537.6
5	Pavir.J03033.1	Pavir.J03033.1	15182	39537	712	712	16	16	64.9	197532	1	1	1	574.628	1720.86	3	1720.87	-0.0058	0	36.95		27	0.006	R	IVGNEHYETAQR	V	Deamidated (NQ)	0.000100000000.0	File833 Spectrum147974 scans: 7325	21302.5	32051.3	23510.9	15138.1	18070.3	20551	16513.9	16301.4
5	Pavir.J03033.1	Pavir.J03033.1	15182	39537	712	712	16	16	64.9	197539	1	1	1	574.629	1720.87	3	1720.87	-0.0029	0	43.28	16	27	0.0013	R	IVGNEHYETAQR	V	Deamidated (NQ)	0.000100000000.0	File831 Spectrum100451 scans: 6840	21008	23231.3	19086.4	19258.5	17488.6	19595.9	10869.3	18196.1
5	Pavir.J03033.1	Pavir.J03033.1	15182	39537	712	712	16	16	64.9	172609	1	1	1	820.966	1639.92	2	1639.92	-0.0059	0	37.98	22	29	0.0074	K	AINLEEESK	L			File831 Spectrum103951 scans: 10573	20702	16574.8	15460.3	16904.5	17105.1	15162.4	12653.7	15471.7
5	Pavir.J03033.1	Pavir.J03033.1	15182	39537	712	712	16	16	64.9	213362	1	1	1	888.486	1774.96	2	1774.96	-0.0012	0	50.87	27	30	0.00043	R	VGLTALTMAEYFR	D			File835 Spectrum217133 scans: 28175	20378.7	24757.9	10358.9	13128.7	8495.81	7464.84	6823.91	18431.6
5	Pavir.J03033.1	Pavir.J03033.1	15182	39537	712	712	16	16	64.9	248088	1	1	1	954.004	1905.99	2	1905.99	0.001	0	55.38	16	29	0.00014	K	VALVYGQMNEPPGAR	M	Deamidated (NQ)	0.000000001000000.0	File845 Spectrum435526 scans: 16246	19987.6	20269.4	16625.8	15565.8	16917.5	14557	10858.2	13050.1
5	Pavir.J03033.1	Pavir.J03033.1	15182	39537	712	712	16	16	64.9	197552	1	1	1	861.442	1720.87	2	1720.87	0.0005	0	42.41	18	27	0.0017	R	IVGNEHYETAQR	V	Deamidated (NQ)	0.000100000000.0	File830 Spectrum77451 scans: 7307	19958.9	20135	15150.3	16086.3	15878.4	11982.8	9779.44	11424.4
5	Pavir.J03033.1	Pavir.J03033.1	15182	39537	712	712	16	16	64.9	197232	1	1	1	574.302	1719.88	3	1719.88	-0.0009	0	56.2	27	28	8.6e-05	R	IVGNEHYETAQR	V			File834 Spectrum170456 scans: 5758	19881.1	27094.7	17358.4	21551.6	15922	17072.9	13427.4	14417.9
5	Pavir.J03033.1	Pavir.J03033.1	15182	39537	712	712	16	16	64.9	252137	1	1	1	961.509	1921	2	1921	-0.0001	0	56.88		29	0.0001	K	VALVYGQMNEPPGAR	M	Oxidation (M)	0.000000030000000.0	File828 Spectrum34623 scans: 13747	19832.2	23859.6	17304.8	16445.3	17974.8	13437.2	11581.2	13767.6
5	Pavir.J03033.1	Pavir.J03033.1	15182	39537	712	712	16	16	64.9	339121	1	1	1	1191.12	2380.22	2	2380.23	-0.0063	0	34.42	17	30	0.019	K	GIYPAVDPLDSTSTMLQPR	I	Oxidation (M)	0.0000000000000030000.0	File842 Spectrum365818 scans: 17330	19380.4	15184.9	13042.3	9643.05	12641.3	11162.3	8213.22	9863.8
5	Pavir.J03033.1	Pavir.J03033.1	15182	39537	712	712	16	16	64.9	252143	1	1	1	961.509	1921	2	1921	0.0005	0	51.41		30	0.00037	K	VALVYGQMNEPPGAR	M	Oxidation (M)	0.000000030000000.0	File844 Spectrum408565 scans: 12774	19074.5	18534.9	14222.3	15132.2	14251.2	11353	8061.99	9561.09
5	Pavir.J03033.1	Pavir.J03033.1	15182	39537	712	712	16	16	64.9	252153	1	1	1	961.51	1921	2	1921	0.0014	0	52.69		30	0.00027	K	VALVYGQMNEPPGAR	M	Oxidation (M)	0.000000030000000.0	File828 Spectrum34520 scans: 13637	18968.3	22165.8	17868.1	14800.2	15233.1	14645.1	12881.2	14036.7
5	Pavir.J03033.1	Pavir.J03033.1	15182	39537	712	712	16	16	64.9	252156	1	1	1	961.51	1921.01	2	1921	0.0017	0	59.04		29	6.1e-05	K	VALVYGQMNEPPGAR	M	Oxidation (M)	0.000000030000000.0	File844 Spectrum408535 scans: 12742	18895.3	18836.8	13776.2	19376.6	17775.6	14315.6	10614.9	12231.6
5	Pavir.J03033.1	Pavir.J03033.1	15182	39537	712	712	16	16	64.9	336987	1	1	1	1183.12	2364.23	2	2364.23	-0.0021	0	38.05	17	30	0.0091	K	GIYPAVDPLDSTSTMLQPR	I			File846 Spectrum463923 scans: 20897	18556.5	14603.4	12712.1	12428.8	13778.6	13496.6	11607.3	9087.97
5	Pavir.J03033.1	Pavir.J03033.1	15182	39537	712	712	16	16	64.9	172840	1	1	1	547.975	1640.9	3	1640.91	-0.0062	0	34.38		29	0.016	K	AINLEEESK	L	Deamidated (NQ)	0.001000000.0	File828 Spectrum31563 scans: 10483	18249.5	22242	17976.9	15834.2	15500.4	16135.5	13239.9	13218.3
5	Pavir.J03033.1	Pavir.J03033.1	15182	39537	712	712	16	16	64.9	213370	1	1	1	888.487	1774.96	2	1774.96	-0.0001	0	38.89	26	30	0.0067	R	VGLTALTMAEYFR	D			File834 Spectrum192214 scans: 28966	17967	18935.5	8361.53	10746.4	6660.47	6591.78	6384.37	16682.6
5	Pavir.J03033.1	Pavir.J03033.1	15182	39537	712	712	16	16	64.9	339184	1	1	1	1191.12	2380.23	2	2380.23	0.0003	0	37.33	15	30	0.0097	K	GIYPAVDPLDSTSTMLQPR	I	Oxidation (M)	0.0000000000000030000.0	File845 Spectrum436581 scans: 17372	17952.6	18093.1	17540.4	14929.1	17172.1	16556.7	12974.4	14417.9
5	Pavir.J03033.1	Pavir.J03033.1	15182	39537	712	712	16	16	64.9	252131	1	1	1	961.509	1921	2	1921	-0.0003	0	51.66		29	0.00034	K	VALVYGQMNEPPGAR	M	Oxidation (M)	0.000000030000000.0	File829 Spectrum59787 scans: 14487	17752.7	17642.5	14257.9	14970.7	14824.4	14244.6	12641	14126.4
5	Pavir.J03033.1	Pavir.J03033.1	15182	39537	712	712	16	16	64.9	247726	1	1	1	636.01	1905.01	3	1905.01	0.0006	0	39.29		30	0.0059	K	VALVYGQMNEPPGAR	M			File827 Spectrum7206 scans: 10821	17683	22441.1	21434	17017.3	19036.3	17421.6	15403	16054.7
5	Pavir.J03033.1	Pavir.J03033.1	15182	39537	712	712	16	16	64.9	252098	1	1	1	961.508	1921	2	1921	-0.0014	0	59.61	16	29	5.4e-05	K	VALVYGQMNEPPGAR	M	Oxidation (M)	0.000000030000000.0	File828 Spectrum34487 scans: 13602	17669.5	17576.8	15475.1	13631.2	15419.5	14754.3	10107.1	12321.3
5	Pavir.J03033.1	Pavir.J03033.1	15182	39537	712	712	16	16	64.9	336969	1	1	1	1183.12	2364.23	2	2364.23	-0.0035	0	40.35	16	30	0.0053	K	GIYPAVDPLDSTSTMLQPR	I			File846 Spectrum463744 scans: 20706	17368.5	17868.6	18473.4	14092.7	13513.2	11145.3	9058.45	11872.9
5	Pavir.J03033.1	Pavir.J03033.1	15182	39537	712	712	16	16	64.9	252054	1	1	1	961.508	1921	2	1921	-0.0025	0	48.7		30	0.00068	K	VALVYGQMNEPPGAR	M	Oxidation (M)	0.000000030000000.0	File828 Spectrum34482 scans: 13596	17073.6	19092.4	14908.5	15074.9	14995.1	16445.8	11722.1	11312.3
5	Pavir.J03033.1	Pavir.J03033.1	15182	39537	712	712	16	16	64.9	197551	1	1	1	861.442	1720.87	2	1720.87	-0.0001	0	40.55	21	27	0.0026	R	IVGNEHYETAQR	V	Deamidated (NQ)	0.000100000000.0	File830 Spectrum77483 scans: 7341	16628.1	18918.3	12774.8	13716.7	12013.6	11665.4	7735.34	9607.06
5	Pavir.J03033.1	Pavir.J03033.1	15182	39537	712	712	16	16	64.9	247674	1	1	1	953.51	1905.01	2	1905.01	-0.0034	0	53.99		30	0.00021	K	VALVYGQMNEPPGAR	M			File830 Spectrum86440 scans: 16895	16609.1	15648.9	13814.6	14969.5	13983.6	12850.7	11312.4	12411
5	Pavir.J03033.1	Pavir.J03033.1	15182	39537	712	712	16	16	64.9	172642	1	1	1	547.649	1639.92	3	1639.92	0	0	36.02	21	29	0.012	K	AINLEEESK	L			File831 Spectrum104052 scans: 10681	16480.9	18641.9	15761.5	15854.7	16233.9	13245.4	10915.5	13610.7
5	Pavir.J03033.1	Pavir.J03033.1	15182	39537	712	712	16	16	64.9	252082	1	1	1	641.341	1921	3	1921	-0.0017	0	39.99	20	29	0.0048	K	VALVYGQMNEPPGAR	M	Oxidation (M)	0.000000030000000.0	File829 Spectrum59814 scans: 14516	16267.2	16414	10206.8	14859.8	15304.4	13706.6	7071.71	11368.4
5	Pavir.J03033.1	Pavir.J03033.1	15182	39537	712	712	16	16	64.9	172597	1	1	1	547.646	1639.92	3	1639.92	-0.0075	0	35.65	22	29	0.013	K	AINLEEESK	L			File834 Spectrum174357 scans: 9919	16232.9	16758.5	17387.1	12301.6	11846.8	10491	12617.2	14126.4
5	Pavir.J03033.1	Pavir.J03033.1	15182	39537	712	712	16	16	64.9	252078	1	1	1	961.508	1921	2	1921	-0.0017	0	46.84		29	0.00099	K	VALVYGQMNEPPGAR	M	Oxidation (M)	0.000000030000000.0	File844 Spectrum408595 scans: 12806	16029.9	14364	12731.1	12139.9	11820.9	9823.02	7796.47	8240.39
5	Pavir.J03033.1	Pavir.J03033.1	15182	39537	712	712	16	16	64.9	172596	1	1	1	547.646	1639.92	3	1639.92	-0.0078	0	38.2	22	29	0.0069	K	AINLEEESK	L			File831 Spectrum102953 scans: 9509	15965.6	41889.4	23776.9	14770.2	31503.3	12480.1	12796.1	40652.6
5	Pavir.J03033.1	Pavir.J03033.1	15182	39537	712	712	16	16	64.9	252166	1	1	1	961.511	1921.01	2	1921	0.0051	0	48.94		29	0.00063	K	VALVYGQMNEPPGAR	M	Oxidation (M)	0.000000030000000.0	File828 Spectrum34465 scans: 13578	15559.6	14615.8	13369.4	11555.6	11407.5	12006.5	9595.99	8294.2
5	Pavir.J03033.1	Pavir.J03033.1	15182	39537	712	712	16	16	64.9	252059	1	1	1	641.341	1921	3	1921	-0.0022	0	42.04		30	0.0032	K	VALVYGQMNEPPGAR	M	Oxidation (M)	0.000000030000000.0	File845 Spectrum427910 scans: 8123	15528.7	14071.3	11934.4	14713.5	15613	11511.6	9007.9	9913.13
5	Pavir.J03033.1	Pavir.J03033.1	15182	39537	712	712	16	16	64.9	252045	1	1	1	961.508	1921	2	1921	-0.0027	0	52.8	18	30	0.00027	K	VALVYGQMNEPPGAR	M	Oxidation (M)	0.000000030000000.0	File846 Spectrum456826 scans: 13326	15528.5	16771.5	10858.1	14934.1	14626.5	10195.5	9172.02	10080.2
5	Pavir.J03033.1	Pavir.J03033.1	15182	39537	712	712	16	16	64.9	252068	1	1	1	961.508	1921	2	1921	-0.0021	0	51.81	16	29	0.00033	K	VALVYGQMNEPPGAR	M	Oxidation (M)	0.000000030000000.0	File844 Spectrum408582 scans: 12792	15493.7	14199.4	11419.8	11588.3	13222.8	9715.4	7822.78	8788.62
5	Pavir.J03033.1	Pavir.J03033.1	15182	39537	712	712	16	16	64.9	202333	1	1	1	869.495	1736.98	2	1736.97	0.0029	0	59.96	23	29	4.3e-05	R	FVQAGSEVSALLGR	M			File831 Spectrum118120 scans: 25687	15462.3	16403.9	7269.55	10084.2	5449.92	4852.59	5570.36	11637.4
5	Pavir.J03033.1	Pavir.J03033.1	15182	39537	712	712	16	16	64.9	172842	1	1	1	547.975	1640.9	3	1640.91	-0.0058	0	34.09		29	0.017	K	AINLEEESK	L	Deamidated (NQ)	0.001000000.0	File831 Spectrum104412 scans: 11065	15331.9	18782.5	16239.9	15585.4	16948.9	13753.5	9699.38	13879.7
5	Pavir.J03033.1	Pavir.J03033.1	15182	39537	712	712	16	16	64.9	248095	1	1	1	954.005	1906	2	1905.99	0.0028	0	59.71	18	29	5e-05	K	VALVYGQMNEPPGAR	M	Deamidated (NQ)	0.000000001000000.0	File845 Spectrum436405 scans: 17184	15044.4	15975.2	14226.4	10888.8	12640.8	11686.3	9757.37	11312.3
5	Pavir.J03033.1	Pavir.J03033.1	15182	39537	712	712	16	16	64.9	197210	1	1	1	574.301	1719.88	3	1719.88	-0.0036	0	37.6	27	28	0.0058	R	IVGNEHYETAQR	V			File839 Spectrum286082 scans: 5631	14879.7	29008	10415.9	16098.9	10656.3	14318.7	8105.25	13173.4
5	Pavir.J03033.1	Pavir.J03033.1	15182	39537	712	712	16	16	64.9	197208	1	1	1	574.301	1719.88	3	1719.88	-0.0038	0	35.43	20	28	0.0096	R	IVGNEHYETAQR	V			File839 Spectrum286031 scans: 5576	14821.8	35538.5	11670.6	23272.4	11637.4	13536.1	9203.53	17803.7
5	Pavir.J03033.1	Pavir.J03033.1	15182	39537	712	712	16	16	64.9	197540	1	1	1	574.629	1720.87	3	1720.87	-0.0029	0	47.56		27	0.0005	R	IVGNEHYETAQR	V	Deamidated (NQ)	0.000100000000.0	File833 Spectrum147606 scans: 6932	14745	24681.7	11427.7	16078.8	12571.6	13590.7	12867.9	13812.5
5	Pavir.J03033.1	Pavir.J03033.1	15182	39537	712	712	16	16	64.9	217674	1	1	1	896.483	1790.95	2	1790.95	-0.0025	0	37.48		30	0.009	R	VGLTALTMAEYFR	D	Oxidation (M)	0.0000000300000.0	File833 Spectrum162349 scans: 22658	14682.7	14019.4	6486.86	11084.9	5993.4	4710.92	5847.16	9215.78
5	Pavir.J03033.1	Pavir.J03033.1	15182	39537	712	712	16	16	64.9	252146	1	1	1	961.509	1921	2	1921	0.0006	0	52.48		30	0.00029	K	VALVYGQMNEPPGAR	M	Oxidation (M)	0.000000030000000.0	File828 Spectrum34704 scans: 13833	14562.1	14400.8	10889.7	11818.4	12471.2	11679.8	8753.72	10779.8
5	Pavir.J03033.1	Pavir.J03033.1	15182	39537	712	712	16	16	64.9	172611	1	1	1	410.987	1639.92	4	1639.92	-0.0055	0	32.01	23	29	0.026	K	AINLEEESK	L			File831 Spectrum103827 scans: 10441	14409.4	8753.48	10496.2	12864.3	12251.7	12607.7	11147.5	12825.9
5	Pavir.J03033.1	Pavir.J03033.1	15182	39537	712	712	16	16	64.9	247643	1	1	1	636.008	1905	3	1905.01	-0.0069	0	33.32	16	29	0.023	K	VALVYGQMNEPPGAR	M			File828 Spectrum38325 scans: 17696	14284.8	7032.59	12740.2	16853.3	14123.4	6921.76	13192.7	11536.5
5	Pavir.J03033.1	Pavir.J03033.1	15182	39537	712	712	16	16	64.9	252075	1	1	1	961.508	1921	2	1921	-0.0019	0	52.43		29	0.00028	K	VALVYGQMNEPPGAR	M	Oxidation (M)	0.000000030000000.0	File844 Spectrum408614 scans: 12826	13804.3	13319.3	10395.8	10111	10764.8	8925.47	5999.97	7441.01
5	Pavir.J03033.1	Pavir.J03033.1	15182	39537	712	712	16	16	64.9	413092	1	1	1	1005.89	3014.65	3	3014.64	0.0093	1	51.51	19	30	0.00038	K	ELQDIIAILGLDELSEEDRLTVAR	A			File830 Spectrum96937 scans: 28092	13614.4	12461.4	12777	11432.9	10388.4	12402.6	10916.8	9073.39
5	Pavir.J03033.1	Pavir.J03033.1	15182	39537	712	712	16	16	64.9	252086	1	1	1	961.508	1921	2	1921	-0.0016	0	49.4	17	29	0.00055	K	VALVYGQMNEPPGAR	M	Oxidation (M)	0.000000030000000.0	File846 Spectrum456850 scans: 13352	13159.9	15232	10058	10726.2	11340.6	8174.23	7039.36	8763.96
5	Pavir.J03033.1	Pavir.J03033.1	15182	39537	712	712	16	16	64.9	252127	1	1	1	961.509	1921	2	1921	-0.0004	0	46.93		29	0.001	K	VALVYGQMNEPPGAR	M	Oxidation (M)	0.000000030000000.0	File845 Spectrum433121 scans: 13681	13004.9	12397.2	10700.8	8595.75	10355.7	8891.92	6319.52	7068.79
5	Pavir.J03033.1	Pavir.J03033.1	15182	39537	712	712	16	16	64.9	252368	1	1	1	641.668	1921.98	3	1921.99	-0.0044	0	40.82	17	29	0.0037	K	VALVYGQMNEPPGAR	M	Deamidated (NQ); Oxidation (M)	0.000000031000000.0	File842 Spectrum361557 scans: 12785	12912.9	13473.9	7670.47	5325.52	14873.7	12402.6	11919.2	8057.64
5	Pavir.J03033.1	Pavir.J03033.1	15182	39537	712	712	16	16	64.9	197534	1	1	1	574.628	1720.86	3	1720.87	-0.0053	0	42.68	15	27	0.0016	R	IVGNEHYETAQR	V	Deamidated (NQ)	0.000100000000.0	File831 Spectrum100351 scans: 6733	12275.9	15669.9	10329	9961.77	10682.7	10254.8	8618.11	10545.5
5	Pavir.J03033.1	Pavir.J03033.1	15182	39537	712	712	16	16	64.9	366447	1	1	1	862.765	2585.27	3	2585.28	-0.0053	0	31.23		29	0.036	R	MPSAVGYQPTLSTEMGSLQER	I			File842 Spectrum365983 scans: 17506	12113.5	14970.2	11843.6	12708.6	15468.4	9999.27	12899.8	10259.6
5	Pavir.J03033.1	Pavir.J03033.1	15182	39537	712	712	16	16	64.9	368300	1	1	1	868.096	2601.27	3	2601.27	-0.0054	0	66.7		29	1e-05	R	MPSAVGYQPTLSTEMGSLQER	I	Oxidation (M)	0.000000000000003000000.0	File841 Spectrum339960 scans: 14279	11861.7	13590.3	6073.4	8282.84	7462.59	4738.49	6182.39	7115.88
5	Pavir.J03033.1	Pavir.J03033.1	15182	39537	712	712	16	16	64.9	252161	1	1	1	961.51	1921.01	2	1921	0.0025	0	55.86		30	0.00013	K	VALVYGQMNEPPGAR	M	Oxidation (M)	0.000000030000000.0	File828 Spectrum34760 scans: 13893	11856.3	10853.3	9476.28	8680.9	9030.71	9916.16	6930.68	8280.75
5	Pavir.J03033.1	Pavir.J03033.1	15182	39537	712	712	16	16	64.9	252151	1	1	1	961.51	1921	2	1921	0.0011	0	42.03		30	0.0032	K	VALVYGQMNEPPGAR	M	Oxidation (M)	0.000000030000000.0	File844 Spectrum408644 scans: 12858	11829.5	11674.3	9498.8	10088.7	9800.38	7529.36	6917.01	7310.96
5	Pavir.J03033.1	Pavir.J03033.1	15182	39537	712	712	16	16	64.9	172849	1	1	1	547.975	1640.9	3	1640.91	-0.0049	0	36.36	26	29	0.01	K	AINLEEESK	L	Deamidated (NQ)	0.001000000.0	File831 Spectrum103078 scans: 9642	11778.8	14112.7	13138.1	12599	11040.7	8874.09	10221.5	9701.23
5	Pavir.J03033.1	Pavir.J03033.1	15182	39537	712	712	16	16	64.9	252136	1	1	1	961.509	1921	2	1921	-0.0001	0	56.69		29	0.00011	K	VALVYGQMNEPPGAR	M	Oxidation (M)	0.000000030000000.0	File828 Spectrum34732 scans: 13863	11678	14490.1	11229.6	11623.7	11457.7	8936.89	7736.2	9505.03
5	Pavir.J03033.1	Pavir.J03033.1	15182	39537	712	712	16	16	64.9	252147	1	1	1	961.509	1921	2	1921	0.0006	0	52.43		30	0.00029	K	VALVYGQMNEPPGAR	M	Oxidation (M)	0.000000030000000.0	File828 Spectrum34747 scans: 13879	11658.8	12789.4	10408.3	9929.7	8434.72	10545.1	6482.24	9277.44
5	Pavir.J03033.1	Pavir.J03033.1	15182	39537	712	712	16	16	64.9	366468	1	1	1	862.767	2585.28	3	2585.28	0.0011	0	46.74	18	30	0.0011	R	MPSAVGYQPTLSTEMGSLQER	I			File846 Spectrum461433 scans: 18241	11629.7	13236	9764.1	12176.1	6436.88	8047.7	7731.66	6184.21
5	Pavir.J03033.1	Pavir.J03033.1	15182	39537	712	712	16	16	64.9	339143	1	1	1	794.414	2380.22	3	2380.23	-0.0037	0	31.91	17	30	0.034	K	GIYPAVDPLDSTSTMLQPR	I	Oxidation (M)	0.0000000000000030000.0	File846 Spectrum460877 scans: 17648	11514.3	5645.29	8994.99	13135.3	16377.4	16121.7	8557.25	7369.26
5	Pavir.J03033.1	Pavir.J03033.1	15182	39537	712	712	16	16	64.9	248089	1	1	1	954.004	1905.99	2	1905.99	0.001	0	61.74		29	3.3e-05	K	VALVYGQMNEPPGAR	M	Deamidated (NQ)	0.000000001000000.0	File845 Spectrum436439 scans: 17220	11439.8	10946.6	9341.2	9908.24	9062.53	9209.73	7137.54	8525.16
5	Pavir.J03033.1	Pavir.J03033.1	15182	39537	712	712	16	16	64.9	247717	1	1	1	636.01	1905.01	3	1905.01	-0.0003	0	34.9		29	0.016	K	VALVYGQMNEPPGAR	M			File827 Spectrum7556 scans: 11194	11368.5	14326.9	9452.48	13847.8	11433.8	13167.1	8820.18	10706.9
5	Pavir.J03033.1	Pavir.J03033.1	15182	39537	712	712	16	16	64.9	197227	1	1	1	574.302	1719.88	3	1719.88	-0.0022	0	30.69	20	28	0.03	R	IVGNEHYETAQR	V			File836 Spectrum220089 scans: 5948	11270.3	28401.1	11188.7	15435.1	10581.8	12004.7	10063.9	11085.8
5	Pavir.J03033.1	Pavir.J03033.1	15182	39537	712	712	16	16	64.9	217686	1	1	1	597.992	1790.96	3	1790.95	0.0008	0	49.92	17	29	0.0005	R	VGLTALTMAEYFR	D	Oxidation (M)	0.0000000300000.0	File831 Spectrum114491 scans: 21816	11170.5	12111.8	6393.58	14222.4	4870.07	1439.52	1902.82	9029.67
5	Pavir.J03033.1	Pavir.J03033.1	15182	39537	712	712	16	16	64.9	252071	1	1	1	641.341	1921	3	1921	-0.0019	0	44	17	29	0.002	K	VALVYGQMNEPPGAR	M	Oxidation (M)	0.000000030000000.0	File844 Spectrum408528 scans: 12735	11134.7	21056.2	7605.98	12200.5	6580.73	11632.3	6118.47	9868.28
5	Pavir.J03033.1	Pavir.J03033.1	15182	39537	712	712	16	16	64.9	252060	1	1	1	641.341	1921	3	1921	-0.0022	0	36.48		30	0.011	K	VALVYGQMNEPPGAR	M	Oxidation (M)	0.000000030000000.0	File845 Spectrum427987 scans: 8205	11055.7	11099.9	9350.09	9915.95	11754.3	9997.01	8598.87	7375.99
5	Pavir.J03033.1	Pavir.J03033.1	15182	39537	712	712	16	16	64.9	248059	1	1	1	636.337	1905.99	3	1905.99	-0.0018	0	32.76	15	29	0.025	K	VALVYGQMNEPPGAR	M	Deamidated (NQ)	0.000000001000000.0	File844 Spectrum411677 scans: 16094	11035.9	21386.8	9013.59	15666.6	14808.3	6824.24	12627.6	14115.2
5	Pavir.J03033.1	Pavir.J03033.1	15182	39537	712	712	16	16	64.9	197226	1	1	1	574.301	1719.88	3	1719.88	-0.0023	0	42.03		28	0.0021	R	IVGNEHYETAQR	V			File838 Spectrum264345 scans: 5824	10961.3	16981.2	9034.37	10395.4	8495.92	11505	6527.98	9703.47
5	Pavir.J03033.1	Pavir.J03033.1	15182	39537	712	712	16	16	64.9	252370	1	1	1	641.668	1921.98	3	1921.99	-0.0041	0	52.57		29	0.00025	K	VALVYGQMNEPPGAR	M	Deamidated (NQ); Oxidation (M)	0.000000031000000.0	File842 Spectrum361736 scans: 12976	10353.8	39030.3	9839.98	9039.86	9262.46	5528.08	5746.76	8460.13
5	Pavir.J03033.1	Pavir.J03033.1	15182	39537	712	712	16	16	64.9	368322	1	1	1	868.097	2601.27	3	2601.27	-0.0024	0	31.11	16	29	0.037	R	MPSAVGYQPTLSTEMGSLQER	I	Oxidation (M)	0.000000000000003000000.0	File844 Spectrum409642 scans: 13923	10129.9	12657.1	6773.63	10837.5	6395.71	7841.36	5953.68	8596.91
5	Pavir.J03033.1	Pavir.J03033.1	15182	39537	712	712	16	16	64.9	213351	1	1	1	592.659	1774.96	3	1774.96	-0.0043	0	44.52	25	29	0.0017	R	VGLTALTMAEYFR	D			File834 Spectrum191950 scans: 28685	10117.4	12197.2	9816.03	4245.19	5680.89	5896.13	4189.9	10241.6
5	Pavir.J03033.1	Pavir.J03033.1	15182	39537	712	712	16	16	64.9	172601	1	1	1	547.646	1639.92	3	1639.92	-0.0069	0	31.43	21	29	0.033	K	AINLEEESK	L			File832 Spectrum126769 scans: 9925	10090	10624.5	9787.71	9663.45	10530.2	6067.45	6066.68	7437.65
5	Pavir.J03033.1	Pavir.J03033.1	15182	39537	712	712	16	16	64.9	417203	1	1	1	1024.23	3069.67	3	3069.67	-0.0025	1	68.25	17	30	9.4e-06	R	YKELQDIIAILGLDELSEEDR	L			File830 Spectrum96915 scans: 28068	9997.63	7244.66	5630.95	7272.79	6058.35	5030.82	4750.15	6703.3
5	Pavir.J03033.1	Pavir.J03033.1	15182	39537	712	712	16	16	64.9	197193	1	1	1	574.299	1719.88	3	1719.88	-0.0082	0	40.1	27	28	0.0032	R	IVGNEHYETAQR	V			File835 Spectrum196343 scans: 5999	9701.73	17706.3	8136.24	11034.6	7634.57	9291.43	6069.21	9374.98
5	Pavir.J03033.1	Pavir.J03033.1	15182	39537	712	712	16	16	64.9	197554	1	1	1	861.442	1720.87	2	1720.87	0.0014	0	48.89	21	27	0.00038	R	IVGNEHYETAQR	V	Deamidated (NQ)	0.000100000000.0	File830 Spectrum77501 scans: 7360	9682.63	10913	7303.37	7640.54	7607.97	6325.72	5391.06	6490.28
5	Pavir.J03033.1	Pavir.J03033.1	15182	39537	712	712	16	16	64.9	368351	1	1	1	868.098	2601.27	3	2601.27	0.0016	0	48.06	16	29	0.00077	R	MPSAVGYQPTLSTEMGSLQER	I	Oxidation (M)	0.000000000000003000000.0	File843 Spectrum386001 scans: 13696	9457.21	7990.41	6884.75	7719.98	7899.46	8518.43	6030.58	4918.45
5	Pavir.J03033.1	Pavir.J03033.1	15182	39537	712	712	16	16	64.9	413093	1	1	1	1005.89	3014.66	3	3014.64	0.0121	1	33.83	15	30	0.022	K	ELQDIIAILGLDELSEEDRLTVAR	A			File830 Spectrum96967 scans: 28124	9440.38	7991.66	8000.34	7959.25	9742.55	7803.6	7934.89	7186.51
5	Pavir.J03033.1	Pavir.J03033.1	15182	39537	712	712	16	16	64.9	352508	1	1	1	1238.16	2474.31	2	2474.31	0.0017	0	68.76	19	31	9.1e-06	K	ELQDIIAILGLDELSEEDR	L			File829 Spectrum73332 scans: 28935	8770.44	13009.7	5342.12	9303.93	2944.58	3669.76	4780.9	10907.6
5	Pavir.J03033.1	Pavir.J03033.1	15182	39537	712	712	16	16	64.9	197197	1	1	1	574.3	1719.88	3	1719.88	-0.0064	0	44.37	27	28	0.0012	R	IVGNEHYETAQR	V			File832 Spectrum123387 scans: 6317	8762.82	23799.2	6332.35	10950.2	7442.14	5777.72	6055.75	8620.45
5	Pavir.J03033.1	Pavir.J03033.1	15182	39537	712	712	16	16	64.9	248084	1	1	1	636.338	1905.99	3	1905.99	0.0004	0	29.63		29	0.054	K	VALVYGQMNEPPGAR	M	Deamidated (NQ)	0.000000001000000.0	File845 Spectrum435559 scans: 16282	8734.76	5306.43	7739.9	5510.21	5837.76	7047	5733.15	4992.44
5	Pavir.J03033.1	Pavir.J03033.1	15182	39537	712	712	16	16	64.9	172628	1	1	1	547.647	1639.92	3	1639.92	-0.0042	0	32.03	20	29	0.031	K	AINLEEESK	L			File835 Spectrum199999 scans: 9899	8406.89	9337.65	7423.86	6250.72	7115.97	5200.21	5841.37	8852.53
5	Pavir.J03033.1	Pavir.J03033.1	15182	39537	712	712	16	16	64.9	197537	1	1	1	574.629	1720.87	3	1720.87	-0.0036	0	33.07		27	0.014	R	IVGNEHYETAQR	V	Deamidated (NQ)	0.000100000000.0	File831 Spectrum100502 scans: 6894	8385.7	12212.8	7355.21	8014.9	5903.25	7243.43	5302.04	8425.37
5	Pavir.J03033.1	Pavir.J03033.1	15182	39537	712	712	16	16	64.9	366486	1	1	1	862.77	2585.29	3	2585.28	0.0099	0	49.49		30	0.00062	R	MPSAVGYQPTLSTEMGSLQER	I			File843 Spectrum389511 scans: 17440	8346.98	13430.9	9995.15	6935.08	5502.26	7385.23	7631.81	8408.56
5	Pavir.J03033.1	Pavir.J03033.1	15182	39537	712	712	16	16	64.9	217672	1	1	1	597.991	1790.95	3	1790.95	-0.0029	0	29.12		29	0.058	R	VGLTALTMAEYFR	D	Oxidation (M)	0.0000000300000.0	File833 Spectrum162261 scans: 22564	8250.19	17958.8	9555.44	11841.9	4700.82	4326.33	6161.89	7595.73
5	Pavir.J03033.1	Pavir.J03033.1	15182	39537	712	712	16	16	64.9	248048	1	1	1	636.337	1905.99	3	1905.99	-0.0029	0	38.56		29	0.007	K	VALVYGQMNEPPGAR	M	Deamidated (NQ)	0.000000001000000.0	File844 Spectrum411856 scans: 16285	8218.02	15284	10093	7112.78	7531.29	9528.8	8092.1	9859.31
5	Pavir.J03033.1	Pavir.J03033.1	15182	39537	712	712	16	16	64.9	417201	1	1	1	1024.23	3069.66	3	3069.67	-0.0047	1	79.39		31	7.3e-07	R	YKELQDIIAILGLDELSEEDR	L			File830 Spectrum96928 scans: 28082	8132.73	8947.66	3846.06	4048.21	4637.28	4545.42	4206.3	4613.49
5	Pavir.J03033.1	Pavir.J03033.1	15182	39537	712	712	16	16	64.9	370274	1	1	1	873.43	2617.27	3	2617.27	0.0017	0	30.91		29	0.035	R	MPSAVGYQPTLSTEMGSLQER	I	2 Oxidation (M)	0.300000000000003000000.0	File838 Spectrum270444 scans: 12330	8083.73	8810.09	5151.08	7089.2	12417.8	6403.36	4054.96	8516.19
5	Pavir.J03033.1	Pavir.J03033.1	15182	39537	712	712	16	16	64.9	197548	1	1	1	431.224	1720.87	4	1720.87	-0.0007	0	34.28	16	27	0.012	R	IVGNEHYETAQR	V	Deamidated (NQ)	0.000100000000.0	File830 Spectrum77425 scans: 7279	7896.81	9341.06	7299.99	10617	7619.53	8803.93	5386.96	7806.5
5	Pavir.J03033.1	Pavir.J03033.1	15182	39537	712	712	16	16	64.9	368361	1	1	1	868.099	2601.28	3	2601.27	0.0032	0	47.43	16	29	0.00088	R	MPSAVGYQPTLSTEMGSLQER	I	Oxidation (M)	0.000000000000003000000.0	File843 Spectrum386234 scans: 13945	7864.18	5234.34	4354.46	11004.5	11399.5	4706.98	4831.63	8360.35
5	Pavir.J03033.1	Pavir.J03033.1	15182	39537	712	712	16	16	64.9	252093	1	1	1	641.341	1921	3	1921	-0.0015	0	42.15		29	0.0029	K	VALVYGQMNEPPGAR	M	Oxidation (M)	0.000000030000000.0	File845 Spectrum427835 scans: 8043	7851.26	7896.12	4646.52	6307.61	7424.96	6284.34	3882.63	4791.76
5	Pavir.J03033.1	Pavir.J03033.1	15182	39537	712	712	16	16	64.9	252135	1	1	1	961.509	1921	2	1921	-0.0001	0	52.74		29	0.00026	K	VALVYGQMNEPPGAR	M	Oxidation (M)	0.000000030000000.0	File845 Spectrum433139 scans: 13700	7475.07	8819.32	6518.95	6883.68	6591.03	5223.72	3680.26	4733.46
5	Pavir.J03033.1	Pavir.J03033.1	15182	39537	712	712	16	16	64.9	252101	1	1	1	641.341	1921	3	1921	-0.0013	0	47.16	20	29	0.00094	K	VALVYGQMNEPPGAR	M	Oxidation (M)	0.000000030000000.0	File844 Spectrum408616 scans: 12829	7186.81	9204.85	9227.25	10769.9	10282.6	9058	3872.47	8019.52
5	Pavir.J03033.1	Pavir.J03033.1	15182	39537	712	712	16	16	64.9	172644	1	1	1	547.649	1639.93	3	1639.92	0.0017	0	34.06	20	29	0.019	K	AINLEEESK	L			File831 Spectrum104302 scans: 10947	7116.12	7731.49	5475.76	10053.5	5875.96	5837.31	5226.28	4946.47
5	Pavir.J03033.1	Pavir.J03033.1	15182	39537	712	712	16	16	64.9	248067	1	1	1	636.338	1905.99	3	1905.99	-0.0016	0	29.59		29	0.052	K	VALVYGQMNEPPGAR	M	Deamidated (NQ)	0.000000001000000.0	File845 Spectrum435515 scans: 16235	7022.11	2739.35	7498.05	5410.05	5688.79	8275.47	6812.59	5392.69
5	Pavir.J03033.1	Pavir.J03033.1	15182	39537	712	712	16	16	64.9	366472	1	1	1	862.767	2585.28	3	2585.28	0.0026	0	32.11	17	30	0.031	R	MPSAVGYQPTLSTEMGSLQER	I			File843 Spectrum390023 scans: 17986	6625.47	6797.98	4718.07	4910.91	5168.58	4265.03	4778.21	4125.8
5	Pavir.J03033.1	Pavir.J03033.1	15182	39537	712	712	16	16	64.9	337007	1	1	1	789.084	2364.23	3	2364.23	-0.0012	0	34.73		30	0.02	K	GIYPAVDPLDSTSTMLQPR	I			File830 Spectrum89960 scans: 20650	6615.61	6947.43	6989.16	6216.88	4785.97	6079.04	5977.76	7241.45
5	Pavir.J03033.1	Pavir.J03033.1	15182	39537	712	712	16	16	64.9	252103	1	1	1	641.341	1921	3	1921	-0.0013	0	52.56		29	0.00027	K	VALVYGQMNEPPGAR	M	Oxidation (M)	0.000000030000000.0	File845 Spectrum428065 scans: 8288	6535.53	9018.92	5747	6080.21	5461.21	5129.94	4979	5778.36
5	Pavir.J03033.1	Pavir.J03033.1	15182	39537	712	712	16	16	64.9	336978	1	1	1	1183.12	2364.23	2	2364.23	-0.0028	0	36.55	17	30	0.013	K	GIYPAVDPLDSTSTMLQPR	I			File844 Spectrum415556 scans: 20231	6496.76	5439.23	6218.16	7191.85	6569.61	4748.54	4642.53	5757.06
5	Pavir.J03033.1	Pavir.J03033.1	15182	39537	712	712	16	16	64.9	370269	1	1	1	873.43	2617.27	3	2617.27	0.0007	0	30.53		29	0.037	R	MPSAVGYQPTLSTEMGSLQER	I	2 Oxidation (M)	0.300000000000003000000.0	File838 Spectrum268468 scans: 10222	6418.07	7164.13	6151.66	5874.08	6399.45	5154.16	4778	3713.22
5	Pavir.J03033.1	Pavir.J03033.1	15182	39537	712	712	16	16	64.9	368342	1	1	1	868.098	2601.27	3	2601.27	-0.0004	0	50.49	18	29	0.00042	R	MPSAVGYQPTLSTEMGSLQER	I	Oxidation (M)	0.000000000000003000000.0	File845 Spectrum433505 scans: 14091	6378.56	7690.7	7086.47	7811.05	7684.54	4803.08	5801.32	6279.51
5	Pavir.J03033.1	Pavir.J03033.1	15182	39537	712	712	16	16	64.9	370262	1	1	1	873.43	2617.27	3	2617.27	0	0	48.23		29	0.00064	R	MPSAVGYQPTLSTEMGSLQER	I	2 Oxidation (M)	0.300000000000003000000.0	File841 Spectrum335293 scans: 9301	6329.51	6543.62	8411.69	6648.86	5448.01	8493.66	3448.68	6092.28
5	Pavir.J03033.1	Pavir.J03033.1	15182	39537	712	712	16	16	64.9	247698	1	1	1	636.01	1905.01	3	1905.01	-0.0019	0	33.52		30	0.023	K	VALVYGQMNEPPGAR	M			File846 Spectrum454156 scans: 10478	6286.8	9173.58	8338.68	7471.46	5661.35	6053	4806.24	6045.19
5	Pavir.J03033.1	Pavir.J03033.1	15182	39537	712	712	16	16	64.9	197206	1	1	1	574.301	1719.88	3	1719.88	-0.0042	0	50.61	26	28	0.00029	R	IVGNEHYETAQR	V			File840 Spectrum308194 scans: 5319	6219.36	33727.7	10727.1	8973.61	4827.13	4575.06	3366.87	5093.34
5	Pavir.J03033.1	Pavir.J03033.1	15182	39537	712	712	16	16	64.9	368364	1	1	1	868.099	2601.28	3	2601.27	0.0034	0	30.24		29	0.046	R	MPSAVGYQPTLSTEMGSLQER	I	Oxidation (M)	0.300000000000000000000.0	File843 Spectrum387675 scans: 15482	5948.5	6622.27	4974.8	7315.39	4210.95	3752.78	3860	2867.88
5	Pavir.J03033.1	Pavir.J03033.1	15182	39537	712	712	16	16	64.9	368343	1	1	1	868.098	2601.27	3	2601.27	-0.0003	0	47.74	16	29	0.0008	R	MPSAVGYQPTLSTEMGSLQER	I	Oxidation (M)	0.000000000000003000000.0	File843 Spectrum386356 scans: 14075	5935.59	3570.9	3644.58	4686.82	5547.75	4047.46	6635.91	3579.8
5	Pavir.J03033.1	Pavir.J03033.1	15182	39537	712	712	16	16	64.9	213355	1	1	1	592.659	1774.96	3	1774.96	-0.0026	0	49.65	24	29	0.00053	R	VGLTALTMAEYFR	D			File835 Spectrum216919 scans: 27947	5926.83	8036.77	3390.7	2954.19	2144.95	3176.58	1996.13	5306.36
5	Pavir.J03033.1	Pavir.J03033.1	15182	39537	712	712	16	16	64.9	366459	1	1	1	862.766	2585.28	3	2585.28	-0.0012	0	80.03		30	5e-07	R	MPSAVGYQPTLSTEMGSLQER	I			File844 Spectrum410213 scans: 14532	5924.23	5229.24	8115.56	6074.98	7725.85	5590.96	5635.76	5926.35
5	Pavir.J03033.1	Pavir.J03033.1	15182	39537	712	712	16	16	64.9	172587	1	1	1	547.645	1639.91	3	1639.92	-0.0102	0	35.3	20	30	0.015	K	AINLEEESK	L			File832 Spectrum127267 scans: 10456	5906.5	6037.57	5961.44	6810.37	6054.49	3963.62	4148.66	5023.83
5	Pavir.J03033.1	Pavir.J03033.1	15182	39537	712	712	16	16	64.9	247710	1	1	1	477.259	1905.01	4	1905.01	-0.001	0	31.37		29	0.036	K	VALVYGQMNEPPGAR	M			File827 Spectrum7342 scans: 10966	5856.69	7261.28	5707.09	5316.13	6701.81	5959.16	3749.69	4940.87
5	Pavir.J03033.1	Pavir.J03033.1	15182	39537	712	712	16	16	64.9	370264	1	1	1	873.43	2617.27	3	2617.27	0	0	45.38		29	0.0012	R	MPSAVGYQPTLSTEMGSLQER	I	2 Oxidation (M)	0.300000000000003000000.0	File841 Spectrum335233 scans: 9237	5825.92	6829.98	5129.26	5496.6	7082.08	6380.78	4557.19	4131.4
5	Pavir.J03033.1	Pavir.J03033.1	15182	39537	712	712	16	16	64.9	368323	1	1	1	868.097	2601.27	3	2601.27	-0.0024	0	36.51		29	0.011	R	MPSAVGYQPTLSTEMGSLQER	I	Oxidation (M)	0.300000000000000000000.0	File841 Spectrum341439 scans: 15857	5476.32	5704.16	10450.6	5434.36	8707.16	4655.86	9864.25	10322.3
5	Pavir.J03033.1	Pavir.J03033.1	15182	39537	712	712	16	16	64.9	366480	1	1	1	862.768	2585.28	3	2585.28	0.0035	0	44.82		30	0.0017	R	MPSAVGYQPTLSTEMGSLQER	I			File844 Spectrum410249 scans: 14570	5475.58	6075.22	6635.45	5485.88	6778.26	5801.41	4660.04	6639.4
5	Pavir.J03033.1	Pavir.J03033.1	15182	39537	712	712	16	16	64.9	252004	1	1	1	641.339	1921	3	1921	-0.0074	0	38.08		29	0.0075	K	VALVYGQMNEPPGAR	M	Oxidation (M)	0.000000030000000.0	File844 Spectrum403869 scans: 7765	5448.29	8061.62	4663.47	5080.18	5094.35	4664.12	3945.87	3718.82
5	Pavir.J03033.1	Pavir.J03033.1	15182	39537	712	712	16	16	64.9	252010	1	1	1	641.34	1921	3	1921	-0.0048	0	39.35		29	0.0055	K	VALVYGQMNEPPGAR	M	Oxidation (M)	0.000000030000000.0	File845 Spectrum428197 scans: 8429	5447.52	6011.17	3670.69	4082.21	5173.72	4201.4	2798.47	4040.59
5	Pavir.J03033.1	Pavir.J03033.1	15182	39537	712	712	16	16	64.9	368347	1	1	1	868.098	2601.27	3	2601.27	0.0009	0	41.88	16	29	0.0031	R	MPSAVGYQPTLSTEMGSLQER	I	Oxidation (M)	0.000000000000003000000.0	File843 Spectrum386267 scans: 13980	5426.71	3313.8	3022.88	3859.16	4021.2	2827.35	2306.58	2281.52
5	Pavir.J03033.1	Pavir.J03033.1	15182	39537	712	712	16	16	64.9	252102	1	1	1	641.341	1921	3	1921	-0.0013	0	55.91		29	0.00013	K	VALVYGQMNEPPGAR	M	Oxidation (M)	0.000000030000000.0	File844 Spectrum403875 scans: 7772	5401.57	7063.21	4847.22	5821.57	5923.86	4931.32	4144.4	3758.06
5	Pavir.J03033.1	Pavir.J03033.1	15182	39537	712	712	16	16	64.9	368373	1	1	1	868.1	2601.28	3	2601.27	0.0056	0	35.65		30	0.014	R	MPSAVGYQPTLSTEMGSLQER	I	Oxidation (M)	0.000000000000003000000.0	File843 Spectrum386327 scans: 14044	5222.16	3249.42	4487.41	4265	5058.33	4642.65	3024.37	3528.23
5	Pavir.J03033.1	Pavir.J03033.1	15182	39537	712	712	16	16	64.9	252069	1	1	1	641.341	1921	3	1921	-0.0021	0	39.26		29	0.0059	K	VALVYGQMNEPPGAR	M	Oxidation (M)	0.000000030000000.0	File844 Spectrum403858 scans: 7753	5218.28	5574.09	5069.28	4455.85	5159.2	4714.59	3659.36	4337.69
5	Pavir.J03033.1	Pavir.J03033.1	15182	39537	712	712	16	16	64.9	456370	1	1	1	1113.6	4450.38	4	4450.38	-0.0035	1	45.71		30	0.0015	K	KGSITSIQAVYVPADDLTDPAPATTFAHLDATTVLSR	G			File830 Spectrum92315 scans: 23162	5211.06	6180.92	5293.89	4490.64	3702.07	4143.77	1946.29	2932.9
5	Pavir.J03033.1	Pavir.J03033.1	15182	39537	712	712	16	16	64.9	252058	1	1	1	641.341	1921	3	1921	-0.0022	0	48.78	18	30	0.00067	K	VALVYGQMNEPPGAR	M	Oxidation (M)	0.000000030000000.0	File846 Spectrum456858 scans: 13361	5153.03	10508.6	6373.89	8323.02	7907.61	3578.11	8875.81	7391.68
5	Pavir.J03033.1	Pavir.J03033.1	15182	39537	712	712	16	16	64.9	366460	1	1	1	862.766	2585.28	3	2585.28	-0.0011	0	35.29	17	30	0.015	R	MPSAVGYQPTLSTEMGSLQER	I			File845 Spectrum437036 scans: 17857	5112.17	2791.48	3349.75	6312.46	5422.91	4010.58	6175.61	4681.88
5	Pavir.J03033.1	Pavir.J03033.1	15182	39537	712	712	16	16	64.9	252018	1	1	1	641.34	1921	3	1921	-0.0041	0	41.41		29	0.0035	K	VALVYGQMNEPPGAR	M	Oxidation (M)	0.000000030000000.0	File845 Spectrum428106 scans: 8332	5097.69	5870.81	6207.68	6012.23	6321.65	5741.17	3394.06	5022.71
5	Pavir.J03033.1	Pavir.J03033.1	15182	39537	712	712	16	16	64.9	71017	1	1	1	442.594	1324.76	3	1324.77	-0.0052	0	41.72		27	0.0018	K	YVGLAETIR	G			File842 Spectrum363486 scans: 14842	5078.48	5205.25	2417.1	4247.66	1895.72	978.199	1505.61	8721.35
5	Pavir.J03033.1	Pavir.J03033.1	15182	39537	712	712	16	16	64.9	252011	1	1	1	641.34	1921	3	1921	-0.0048	0	44.18		29	0.0018	K	VALVYGQMNEPPGAR	M	Oxidation (M)	0.000000030000000.0	File845 Spectrum428145 scans: 8373	5012.2	7173.08	5099.6	5225.25	5351.52	5962.58	3702.41	5933.08
5	Pavir.J03033.1	Pavir.J03033.1	15182	39537	712	712	16	16	64.9	252061	1	1	1	641.341	1921	3	1921	-0.0022	0	52.38		30	0.00029	K	VALVYGQMNEPPGAR	M	Oxidation (M)	0.000000030000000.0	File845 Spectrum428121 scans: 8348	4936.54	8153.74	5721.99	5777.96	5268.33	3909.01	3920.54	5267.12
5	Pavir.J03033.1	Pavir.J03033.1	15182	39537	712	712	16	16	64.9	366462	1	1	1	862.766	2585.28	3	2585.28	-0.0007	0	34.43	16	30	0.018	R	MPSAVGYQPTLSTEMGSLQER	I			File842 Spectrum365764 scans: 17272	4911.03	5298.12	5693.38	4307.13	6006.17	5607.54	4906.82	5742.48
5	Pavir.J03033.1	Pavir.J03033.1	15182	39537	712	712	16	16	64.9	252022	1	1	1	481.257	1921	4	1921	-0.0038	0	34.48	17	29	0.017	K	VALVYGQMNEPPGAR	M	Oxidation (M)	0.000000030000000.0	File829 Spectrum58877 scans: 13516	4908.1	7522.48	5037.7	3260.42	4104.71	4416.32	4528.3	4496.9
5	Pavir.J03033.1	Pavir.J03033.1	15182	39537	712	712	16	16	64.9	247723	1	1	1	636.01	1905.01	3	1905.01	0.0002	0	41.36		30	0.0037	K	VALVYGQMNEPPGAR	M			File827 Spectrum7136 scans: 10746	4849	9091.69	6143.58	5662.67	5213.1	6497.39	5210.51	6622.58
5	Pavir.J03033.1	Pavir.J03033.1	15182	39537	712	712	16	16	64.9	248049	1	1	1	636.337	1905.99	3	1905.99	-0.0029	0	29.97		29	0.05	K	VALVYGQMNEPPGAR	M	Deamidated (NQ)	0.000000001000000.0	File845 Spectrum435970 scans: 16720	4779.68	7011.07	6007.32	9719.05	3871.85	6607.37	6605.42	9749.44
5	Pavir.J03033.1	Pavir.J03033.1	15182	39537	712	712	16	16	64.9	202638	1	1	1	869.985	1737.95	2	1737.96	-0.002	0	56.13	21	28	9.5e-05	R	FVQAGSEVSALLGR	M	Deamidated (NQ)	0.00100000000000.0	File831 Spectrum118927 scans: 26547	4706.36	4408.31	2781.91	3107.77	1642.92	1501.09	1863.45	3630.25
5	Pavir.J03033.1	Pavir.J03033.1	15182	39537	712	712	16	16	64.9	172599	1	1	1	547.646	1639.92	3	1639.92	-0.0073	0	36.5	20	29	0.01	K	AINLEEESK	L			File832 Spectrum127300 scans: 10491	4688.54	6217.51	3822.23	4642.51	5392.37	5332.75	3172.22	5729.03
5	Pavir.J03033.1	Pavir.J03033.1	15182	39537	712	712	16	16	64.9	366474	1	1	1	862.767	2585.28	3	2585.28	0.0032	0	45.35	17	30	0.0015	R	MPSAVGYQPTLSTEMGSLQER	I			File843 Spectrum388867 scans: 16753	4649.9	5016.3	4301.04	3983.02	3580.41	4353.16	3832.78	4037.23
5	Pavir.J03033.1	Pavir.J03033.1	15182	39537	712	712	16	16	64.9	366574	1	1	1	863.092	2586.26	3	2586.26	-0.0055	0	43.41	16	29	0.0018	R	MPSAVGYQPTLSTEMGSLQER	I	Deamidated (NQ)	0.000000010000000000000.0	File840 Spectrum321223 scans: 19217	4589.27	8611.11	4916.54	5022.07	4647.5	6778.54	4246.49	3145.92
5	Pavir.J03033.1	Pavir.J03033.1	15182	39537	712	712	16	16	64.9	252125	1	1	1	641.341	1921	3	1921	-0.0006	0	31.22		29	0.037	K	VALVYGQMNEPPGAR	M	Oxidation (M)	0.000000030000000.0	File844 Spectrum403958 scans: 7860	4496.84	6824.04	5312.85	4877.47	5299.01	4475.51	4011.28	3648.19
5	Pavir.J03033.1	Pavir.J03033.1	15182	39537	712	712	16	16	64.9	217654	1	1	1	597.99	1790.95	3	1790.95	-0.006	0	50.62	17	29	0.00043	R	VGLTALTMAEYFR	D	Oxidation (M)	0.0000000300000.0	File832 Spectrum138065 scans: 21975	4462.3	3932.23	1910.4	2838.08	2260.33	1444.26	1520.95	2606.65
5	Pavir.J03033.1	Pavir.J03033.1	15182	39537	712	712	16	16	64.9	336963	1	1	1	789.083	2364.23	3	2364.23	-0.0041	0	67.19	22	30	1.1e-05	K	GIYPAVDPLDSTSTMLQPR	I			File846 Spectrum463716 scans: 20676	4391.34	5004.94	5250.65	10097.6	6000.7	7024.21	6734.3	10270.8
5	Pavir.J03033.1	Pavir.J03033.1	15182	39537	712	712	16	16	64.9	202285	1	1	1	579.997	1736.97	3	1736.97	-0.0043	0	64.83		29	1.4e-05	R	FVQAGSEVSALLGR	M			File833 Spectrum165090 scans: 25582	4359.34	3736.97	2674.53	2622.41	1496.52	1669.69	1722.53	3148.16
5	Pavir.J03033.1	Pavir.J03033.1	15182	39537	712	712	16	16	64.9	370289	1	1	1	873.432	2617.27	3	2617.27	0.0073	0	33.11		29	0.022	R	MPSAVGYQPTLSTEMGSLQER	I	2 Oxidation (M)	0.300000000000003000000.0	File838 Spectrum268502 scans: 10258	4282	6251.6	3840.1	3957.9	4093.19	3500.27	3160.57	3089.86
5	Pavir.J03033.1	Pavir.J03033.1	15182	39537	712	712	16	16	64.9	366455	1	1	1	862.766	2585.28	3	2585.28	-0.002	0	32.23		30	0.03	R	MPSAVGYQPTLSTEMGSLQER	I			File845 Spectrum437292 scans: 18130	4176.77	4530.2	3107.97	3887.69	4166.14	3340.85	3905.24	3016.99
5	Pavir.J03033.1	Pavir.J03033.1	15182	39537	712	712	16	16	64.9	368338	1	1	1	868.098	2601.27	3	2601.27	-0.001	0	32.97	15	29	0.024	R	MPSAVGYQPTLSTEMGSLQER	I	Oxidation (M)	0.300000000000000000000.0	File841 Spectrum341353 scans: 15765	4152.76	3704.28	2825.78	2629.32	3144.18	3623.82	3125.17	4140.37
5	Pavir.J03033.1	Pavir.J03033.1	15182	39537	712	712	16	16	64.9	197195	1	1	1	574.3	1719.88	3	1719.88	-0.0071	0	29.82	17	28	0.035	R	IVGNEHYETAQR	V			File845 Spectrum425950 scans: 6032	4117.03	6698.56	2845.92	4499.07	2534.43	1947.79	2385.14	2843.21
5	Pavir.J03033.1	Pavir.J03033.1	15182	39537	712	712	16	16	64.9	197211	1	1	1	574.301	1719.88	3	1719.88	-0.0036	0	44.82	26	28	0.0011	R	IVGNEHYETAQR	V			File841 Spectrum331690 scans: 5458	4005.2	27963.9	10407.8	13535.9	4192.22	4249.82	2468.01	7019.46
5	Pavir.J03033.1	Pavir.J03033.1	15182	39537	712	712	16	16	64.9	456390	1	1	1	1113.61	4450.39	4	4450.38	0.0092	1	42.05		29	0.0031	K	KGSITSIQAVYVPADDLTDPAPATTFAHLDATTVLSR	G			File829 Spectrum68629 scans: 23918	3995.92	2603.46	3909.56	2753.38	4451.98	3794.09	2940.25	2505.75
5	Pavir.J03033.1	Pavir.J03033.1	15182	39537	712	712	16	16	64.9	247677	1	1	1	636.009	1905.01	3	1905.01	-0.0032	0	35.35		30	0.015	K	VALVYGQMNEPPGAR	M			File828 Spectrum32097 scans: 11052	3993.89	6400.76	4979.63	5131.13	4060.43	5407.54	2981.33	4101.13
5	Pavir.J03033.1	Pavir.J03033.1	15182	39537	712	712	16	16	64.9	197220	1	1	1	574.301	1719.88	3	1719.88	-0.0027	0	33.83	26	28	0.014	R	IVGNEHYETAQR	V			File840 Spectrum308247 scans: 5376	3952.52	16549.5	7111.28	8759.81	3132.86	4472.55	2497.15	4166.16
5	Pavir.J03033.1	Pavir.J03033.1	15182	39537	712	712	16	16	64.9	339189	1	1	1	1191.12	2380.23	2	2380.23	0.0016	0	36.39	18	30	0.012	K	GIYPAVDPLDSTSTMLQPR	I	Oxidation (M)	0.0000000000000030000.0	File846 Spectrum460885 scans: 17656	3906.18	3442.06	2837.3	2510.55	3521.21	3416.49	3139.86	3169.47
5	Pavir.J03033.1	Pavir.J03033.1	15182	39537	712	712	16	16	64.9	370256	1	1	1	873.429	2617.27	3	2617.27	-0.0009	0	32.43		29	0.024	R	MPSAVGYQPTLSTEMGSLQER	I	2 Oxidation (M)	0.300000000000003000000.0	File841 Spectrum335313 scans: 9322	3891.21	2551.49	3598.29	4053.82	4270.5	3068.34	2032.37	3616.8
5	Pavir.J03033.1	Pavir.J03033.1	15182	39537	712	712	16	16	64.9	368337	1	1	1	868.098	2601.27	3	2601.27	-0.0012	0	38.48	20	29	0.0068	R	MPSAVGYQPTLSTEMGSLQER	I	Oxidation (M)	0.300000000000000000000.0	File845 Spectrum434771 scans: 15441	3866.52	5111.61	3604.87	3589.25	3820.01	2074.83	2446.73	4772.7
5	Pavir.J03033.1	Pavir.J03033.1	15182	39537	712	712	16	16	64.9	197221	1	1	1	574.301	1719.88	3	1719.88	-0.0027	0	34.39	26	28	0.012	R	IVGNEHYETAQR	V			File844 Spectrum402036 scans: 5810	3782.97	8462.53	3600.71	4981.25	2549.6	2935.81	2029.95	3472.17
5	Pavir.J03033.1	Pavir.J03033.1	15182	39537	712	712	16	16	64.9	247666	1	1	1	636.009	1905	3	1905.01	-0.004	0	52.16		29	0.0003	K	VALVYGQMNEPPGAR	M			File827 Spectrum7780 scans: 11433	3773.06	6136.76	5663.76	4872.99	4578.34	4457.94	3562.19	4291.73
5	Pavir.J03033.1	Pavir.J03033.1	15182	39537	712	712	16	16	64.9	71014	1	1	1	442.594	1324.76	3	1324.77	-0.0059	0	33.24	23	27	0.012	K	YVGLAETIR	G			File842 Spectrum363547 scans: 14907	3762.29	2772.48	1455.92	2538.48	1884.96	2197.39	2036.86	3997.99
5	Pavir.J03033.1	Pavir.J03033.1	15182	39537	712	712	16	16	64.9	172594	1	1	1	547.646	1639.92	3	1639.92	-0.0084	0	38.92	22	29	0.006	K	AINLEEESK	L			File832 Spectrum127315 scans: 10507	3744.56	6433.3	3927.2	4476.96	4521.98	3243.33	3108.97	3732.28
5	Pavir.J03033.1	Pavir.J03033.1	15182	39537	712	712	16	16	64.9	417210	1	1	1	1024.23	3069.67	3	3069.67	0.0031	1	76.65		30	1.4e-06	R	YKELQDIIAILGLDELSEEDR	L			File830 Spectrum97005 scans: 28164	3525.8	2900.88	2346.28	2300.64	2119.03	1762.27	1621.49	2277.04
5	Pavir.J03033.1	Pavir.J03033.1	15182	39537	712	712	16	16	64.9	202299	1	1	1	579.997	1736.97	3	1736.97	-0.0023	0	59.67	22	29	4.4e-05	R	FVQAGSEVSALLGR	M			File830 Spectrum93773 scans: 24717	3318.77	4495.92	2222.57	3056.93	2710.66	2476.64	1742.07	3928.48
5	Pavir.J03033.1	Pavir.J03033.1	15182	39537	712	712	16	16	64.9	413094	1	1	1	1005.89	3014.66	3	3014.64	0.0121	1	41.27		30	0.0039	K	ELQDIIAILGLDELSEEDRLTVAR	A			File830 Spectrum97028 scans: 28189	3262.51	3124.35	3656.96	2729.86	2923.99	3011.78	2613.08	2754.64
5	Pavir.J03033.1	Pavir.J03033.1	15182	39537	712	712	16	16	64.9	337053	1	1	1	789.085	2364.23	3	2364.23	0.0041	0	33.2	20	30	0.029	K	GIYPAVDPLDSTSTMLQPR	I			File843 Spectrum392360 scans: 20479	3181.14	6373.39	2314.3	6049.21	3833.24	3236.21	2688.46	5964.47
5	Pavir.J03033.1	Pavir.J03033.1	15182	39537	712	712	16	16	64.9	197222	1	1	1	574.301	1719.88	3	1719.88	-0.0025	0	46.66	23	28	0.00073	R	IVGNEHYETAQR	V			File837 Spectrum241530 scans: 5250	3163.24	23119.6	7881.31	9326.37	3883.41	2156.51	1646.79	2856.67
5	Pavir.J03033.1	Pavir.J03033.1	15182	39537	712	712	16	16	64.9	336993	1	1	1	789.083	2364.23	3	2364.23	-0.0017	0	34.06	17	30	0.023	K	GIYPAVDPLDSTSTMLQPR	I			File845 Spectrum440129 scans: 21156	3147.13	6790.26	3169.09	5301.13	2845.31	3413.86	4426.36	4576.5
5	Pavir.J03033.1	Pavir.J03033.1	15182	39537	712	712	16	16	64.9	336962	1	1	1	789.083	2364.23	3	2364.23	-0.0043	0	39.34		30	0.0068	K	GIYPAVDPLDSTSTMLQPR	I			File832 Spectrum137220 scans: 21074	2953.06	3961.06	3817.67	3718.99	2696.18	1661.3	2224.61	3327.55
5	Pavir.J03033.1	Pavir.J03033.1	15182	39537	712	712	16	16	64.9	370234	1	1	1	873.428	2617.26	3	2617.27	-0.0057	0	32.09		29	0.025	R	MPSAVGYQPTLSTEMGSLQER	I	2 Oxidation (M)	0.300000000000003000000.0	File837 Spectrum247204 scans: 11312	2853.06	2768.9	3387.78	3615	2327.44	2008.01	1787.94	2146.98
5	Pavir.J03033.1	Pavir.J03033.1	15182	39537	712	712	16	16	64.9	202655	1	1	1	580.326	1737.96	3	1737.96	-0.0006	0	83.53	21	29	1.9e-07	R	FVQAGSEVSALLGR	M	Deamidated (NQ)	0.00100000000000.0	File827 Spectrum21832 scans: 26422	2807.92	2891.8	1184.51	2832.89	1288.47	504.306	1138.64	2451.94
5	Pavir.J03033.1	Pavir.J03033.1	15182	39537	712	712	16	16	64.9	370260	1	1	1	873.43	2617.27	3	2617.27	-0.0002	0	31.39	15	29	0.031	R	MPSAVGYQPTLSTEMGSLQER	I	2 Oxidation (M)	0.300000000000003000000.0	File845 Spectrum431024 scans: 11444	2545.77	1708.1	2261.21	1902.84	1273.59	1209.24	668.467	1602.11
5	Pavir.J03033.1	Pavir.J03033.1	15182	39537	712	712	16	16	64.9	370283	1	1	1	873.431	2617.27	3	2617.27	0.0035	0	29.2		29	0.051	R	MPSAVGYQPTLSTEMGSLQER	I	2 Oxidation (M)	0.300000000000003000000.0	File841 Spectrum337127 scans: 11257	2510.28	2463.45	3932.81	2849.11	2944.65	2603.33	1793.92	2594.32
5	Pavir.J03033.1	Pavir.J03033.1	15182	39537	712	712	16	16	64.9	366440	1	1	1	862.763	2585.27	3	2585.28	-0.0102	0	31.61	16	29	0.032	R	MPSAVGYQPTLSTEMGSLQER	I			File828 Spectrum39061 scans: 18481	2422.09	5844.65	4371.27	2301.23	3557.44	2529.99	2007.26	3147.04
5	Pavir.J03033.1	Pavir.J03033.1	15182	39537	712	712	16	16	64.9	370232	1	1	1	873.427	2617.26	3	2617.27	-0.0073	0	29.34	19	29	0.047	R	MPSAVGYQPTLSTEMGSLQER	I	2 Oxidation (M)	0.300000000000003000000.0	File841 Spectrum337063 scans: 11189	2381.43	4252.31	3982.39	2806.84	2556.47	2781.11	2617.42	2596.56
5	Pavir.J03033.1	Pavir.J03033.1	15182	39537	712	712	16	16	64.9	370273	1	1	1	873.43	2617.27	3	2617.27	0.0017	0	44.58	15	29	0.0015	R	MPSAVGYQPTLSTEMGSLQER	I	2 Oxidation (M)	0.300000000000003000000.0	File845 Spectrum431053 scans: 11475	2308.12	1989.03	2376.87	1647.03	1027.06	1077.09	1373.07	1788.22
5	Pavir.J03033.1	Pavir.J03033.1	15182	39537	712	712	16	16	64.9	247662	1	1	1	477.258	1905	4	1905.01	-0.0043	0	47.03		29	0.00096	K	VALVYGQMNEPPGAR	M			File828 Spectrum37958 scans: 17304	2085.33	4260.07	2649.79	1735.4	2249.07	2055.1	2063.31	2010.21
5	Pavir.J03033.1	Pavir.J03033.1	15182	39537	712	712	16	16	64.9	413089	1	1	1	1005.89	3014.65	3	3014.64	0.0079	1	36.27	16	30	0.013	K	ELQDIIAILGLDELSEEDRLTVAR	A			File830 Spectrum97055 scans: 28218	2082.98	2134.95	2184.81	1826.34	1891.12	1901.3	1479.1	1097.93
5	Pavir.J03033.1	Pavir.J03033.1	15182	39537	712	712	16	16	64.9	337012	1	1	1	789.084	2364.23	3	2364.23	-0.0006	0	42.84	19	30	0.003	K	GIYPAVDPLDSTSTMLQPR	I			File842 Spectrum369119 scans: 20851	2053.91	3728.16	2640.51	3263.97	2896.48	1112.82	2105.22	2630.2
5	Pavir.J03033.1	Pavir.J03033.1	15182	39537	712	712	16	16	64.9	197230	1	1	1	860.949	1719.88	2	1719.88	-0.0018	0	43.74	28	28	0.0015	R	IVGNEHYETAQR	V			File841 Spectrum331735 scans: 5506	2033.05	16129.3	6092.59	7903.86	1748.93	1427.37	662.969	4133.65
5	Pavir.J03033.1	Pavir.J03033.1	15182	39537	712	712	16	16	64.9	456342	1	1	1	1113.6	4450.37	4	4450.38	-0.0142	1	64.37		30	2.1e-05	K	KGSITSIQAVYVPADDLTDPAPATTFAHLDATTVLSR	G			File828 Spectrum44771 scans: 24571	1863.08	1062.18	1970.07	1283.08	2010.94	1283.94	1008.61	728.629
5	Pavir.J03033.1	Pavir.J03033.1	15182	39537	712	712	16	16	64.9	370284	1	1	1	873.431	2617.27	3	2617.27	0.0039	0	44.74		29	0.0015	R	MPSAVGYQPTLSTEMGSLQER	I	2 Oxidation (M)	0.300000000000003000000.0	File843 Spectrum383543 scans: 11074	1852.25	1986.88	1698.42	1533.74	1429.24	2712.51	1742.55	1198.5
5	Pavir.J03033.1	Pavir.J03033.1	15182	39537	712	712	16	16	64.9	456404	1	1	1	1113.85	4451.37	4	4451.37	0.0057	1	42.83		30	0.0029	K	KGSITSIQAVYVPADDLTDPAPATTFAHLDATTVLSR	G	Deamidated (NQ)	0.0000000100000000000000000000000000000.0	File832 Spectrum139645 scans: 23660	1739.34	1913.06	1093.51	1391.14	1494.94	910.435	1261.47	1163.74
5	Pavir.J03033.1	Pavir.J03033.1	15182	39537	712	712	16	16	64.9	417216	1	1	1	1024.23	3069.68	3	3069.67	0.0096	1	66.08		30	1.5e-05	R	YKELQDIIAILGLDELSEEDR	L			File830 Spectrum97046 scans: 28208	1682.65	1273.09	1235.07	1207.26	1050.94	722.367	800.903	1113.07
5	Pavir.J03033.1	Pavir.J03033.1	15182	39537	712	712	16	16	64.9	456418	1	1	1	1113.85	4451.39	4	4451.37	0.0189	1	34.27		30	0.019	K	KGSITSIQAVYVPADDLTDPAPATTFAHLDATTVLSR	G	Deamidated (NQ)	0.0000000100000000000000000000000000000.0	File828 Spectrum43599 scans: 23321	1582.01	7206.75	2786.66	985.646	2251.85	1536.19	1494.97	2749.04
5	Pavir.J03033.1	Pavir.J03033.1	15182	39537	712	712	16	16	64.9	456338	1	1	1	1113.6	4450.36	4	4450.38	-0.0206	1	31.47		30	0.042	K	KGSITSIQAVYVPADDLTDPAPATTFAHLDATTVLSR	G			File828 Spectrum44606 scans: 24395	1549.63	1780.23	1076.02	2191.71	2397.3	1617.08	2324.05	1381.25
5	Pavir.J03033.1	Pavir.J03033.1	15182	39537	712	712	16	16	64.9	202632	1	1	1	580.325	1737.95	3	1737.96	-0.0028	0	71.48	19	29	2.9e-06	R	FVQAGSEVSALLGR	M	Deamidated (NQ)	0.00100000000000.0	File827 Spectrum21913 scans: 26508	1501.49	1525.84	469.667	898.297	1068.95	776.193	724.466	1081.23
5	Pavir.J03033.1	Pavir.J03033.1	15182	39537	712	712	16	16	64.9	202317	1	1	1	579.998	1736.97	3	1736.97	-0.0005	0	48.71	23	29	0.00059	R	FVQAGSEVSALLGR	M			File831 Spectrum118183 scans: 25754	1437.89	1976.12	1366.65	2215.71	1039.13	824.745	871.175	1753.46
5	Pavir.J03033.1	Pavir.J03033.1	15182	39537	712	712	16	16	64.9	370241	1	1	1	873.429	2617.26	3	2617.27	-0.0031	0	37.57	15	29	0.0072	R	MPSAVGYQPTLSTEMGSLQER	I	2 Oxidation (M)	0.300000000000003000000.0	File837 Spectrum247265 scans: 11377	1328.7	2789.39	1704.44	1548.59	2023.02	2133.08	1427.7	2158.2
5	Pavir.J03033.1	Pavir.J03033.1	15182	39537	712	712	16	16	64.9	202631	1	1	1	580.325	1737.95	3	1737.96	-0.0032	0	54.48		29	0.00014	R	FVQAGSEVSALLGR	M	Deamidated (NQ)	0.00100000000000.0	File831 Spectrum118933 scans: 26554	1016.38	1063.93	613.004	757.567	789.119	798.021	627.558	674.366
5	Pavir.J03033.1	Pavir.J03033.1	15182	39537	712	712	16	16	64.9	417208	1	1	1	1024.23	3069.67	3	3069.67	0.0019	1	64.32		31	2.3e-05	R	YKELQDIIAILGLDELSEEDR	L			File830 Spectrum97186 scans: 29391	944.982	704.528	605.931	521.646	335.261	686.232	549.332	701.274
5	Pavir.J03033.1	Pavir.J03033.1	15182	39537	712	712	16	16	64.9	202641	1	1	1	580.326	1737.95	3	1737.96	-0.0018	0	66.12	19	29	1e-05	R	FVQAGSEVSALLGR	M	Deamidated (NQ)	0.00100000000000.0	File831 Spectrum118882 scans: 26499	750.359	885.112	388.38	758.172	283.579	366.604	346.477	506.419
5	Pavir.J03033.1	Pavir.J03033.1	15182	39537	712	712	16	16	64.9	202671	1	1	1	580.327	1737.96	3	1737.96	0.0021	0	83.57	22	29	1.8e-07	R	FVQAGSEVSALLGR	M	Deamidated (NQ)	0.00100000000000.0	File831 Spectrum118891 scans: 26509	746.386	736.003	515.997	546.922	564.738	357.185	464.826	673.469
5	Pavir.J03033.1	Pavir.J03033.1	15182	39537	712	712	16	16	64.9	417200	1	1	1	1024.23	3069.66	3	3069.67	-0.005	1	53.55		31	0.00028	R	YKELQDIIAILGLDELSEEDR	L			File830 Spectrum97110 scans: 28277	650.13	531.913	416.297	441.831	379.435	341.115	279.595	530.748
5	Pavir.J03033.1	Pavir.J03033.1	15182	39537	712	712	16	16	64.9	202303	1	1	1	579.998	1736.97	3	1736.97	-0.0019	0	39.51	16	29	0.0049	R	FVQAGSEVSALLGR	M			File838 Spectrum282523 scans: 25214	575.706	876.915	554.239	519.449	529.276	331.673	419.773	591.962
6	Pavir.J14626.1	Pavir.J14626.1	14528	52574	505	505	19	19	60.8	293633	1	1	1	1053.08	2104.15	2	2104.15	-0.0017	0	59.96		30	5.4e-05	K	LVSAMPNGSVTLLENVR	F	Deamidated (NQ)	0.00000010000000000.0	File827 Spectrum18212 scans: 22561	324736	385282	322793	246619	288989	303527	199989	272549
6	Pavir.J14626.1	Pavir.J14626.1	14528	52574	505	505	19	19	60.8	293635	1	1	1	1053.08	2104.15	2	2104.15	-0.0014	0	61		30	4.3e-05	K	LVSAMPNGSVTLLENVR	F	Deamidated (NQ)	0.00000010000000000.0	File827 Spectrum18152 scans: 22497	270854	282860	251578	212499	235895	261704	203377	219407
6	Pavir.J14626.1	Pavir.J14626.1	14528	52574	505	505	19	19	60.8	297117	1	1	1	1061.08	2120.14	2	2120.15	-0.0022	0	69.38	18	30	6.3e-06	K	LVSAMPNGSVTLLENVR	F	Deamidated (NQ); Oxidation (M)	0.00003010000000000.0	File844 Spectrum414165 scans: 18748	257794	291816	193280	222528	165136	173448	148137	176243
6	Pavir.J14626.1	Pavir.J14626.1	14528	52574	505	505	19	19	60.8	297112	1	1	1	1061.08	2120.14	2	2120.15	-0.0027	0	63.37	17	30	2.6e-05	K	LVSAMPNGSVTLLENVR	F	Deamidated (NQ); Oxidation (M)	0.00003010000000000.0	File844 Spectrum414121 scans: 18701	220706	203186	160434	178753	136954	158137	93265	133752
6	Pavir.J14626.1	Pavir.J14626.1	14528	52574	505	505	19	19	60.8	293643	1	1	1	1053.08	2104.15	2	2104.15	0	0	36.28	30	30	0.013	K	LVSAMPNGSVTLLENVR	F	Deamidated (NQ)	0.00000010000000000.0	File827 Spectrum18288 scans: 22642	143098	160188	163166	102444	95363.2	140627	120894	132295
6	Pavir.J14626.1	Pavir.J14626.1	14528	52574	505	505	19	19	60.8	293642	1	1	1	1053.08	2104.15	2	2104.15	-0.0002	0	57.83		30	9e-05	K	LVSAMPNGSVTLLENVR	F	Deamidated (NQ)	0.00000010000000000.0	File827 Spectrum18317 scans: 22673	132495	153759	130795	111199	130940	140260	101026	127922
6	Pavir.J14626.1	Pavir.J14626.1	14528	52574	505	505	19	19	60.8	297115	1	1	1	1061.08	2120.14	2	2120.15	-0.0025	0	65.71	19	30	1.5e-05	K	LVSAMPNGSVTLLENVR	F	Deamidated (NQ); Oxidation (M)	0.00003010000000000.0	File844 Spectrum414225 scans: 18812	107755	128556	92339.8	114008	86977.5	92997.8	72615.3	69712.5
6	Pavir.J14626.1	Pavir.J14626.1	14528	52574	505	505	19	19	60.8	297111	1	1	1	707.721	2120.14	3	2120.15	-0.0031	0	61.71	17	30	3.8e-05	K	LVSAMPNGSVTLLENVR	F	Deamidated (NQ); Oxidation (M)	0.00003010000000000.0	File844 Spectrum414406 scans: 19005	98024.7	50996.2	78468.5	60120	42183.5	58176.9	49058.6	58680.5
6	Pavir.J14626.1	Pavir.J14626.1	14528	52574	505	505	19	19	60.8	297113	1	1	1	1061.08	2120.14	2	2120.15	-0.0027	0	66.37	20	30	1.3e-05	K	LVSAMPNGSVTLLENVR	F	Deamidated (NQ); Oxidation (M)	0.00003010000000000.0	File844 Spectrum414390 scans: 18988	90426.1	76773.3	70144.4	65524.9	53301.2	64702.6	50215	57828.4
6	Pavir.J14626.1	Pavir.J14626.1	14528	52574	505	505	19	19	60.8	214527	1	1	1	890.498	1778.98	2	1778.99	-0.0055	0	48.19	23	29	0.00063	K	ADDVIGPEVEK	L			File829 Spectrum56910 scans: 11418	71398.5	63484.6	68048.2	57719.8	57236.3	66091.4	45876.6	47951.2
6	Pavir.J14626.1	Pavir.J14626.1	14528	52574	505	505	19	19	60.8	293646	1	1	1	1053.08	2104.15	2	2104.15	0.0005	0	51.05		30	0.00043	K	LVSAMPNGSVTLLENVR	F	Deamidated (NQ)	0.00000010000000000.0	File827 Spectrum18348 scans: 22706	69989.9	78409.8	66297.5	55338.2	57779	62349.7	54378.8	61943
6	Pavir.J14626.1	Pavir.J14626.1	14528	52574	505	505	19	19	60.8	214533	1	1	1	594.002	1778.98	3	1778.99	-0.0042	0	50.35	24	29	0.00039	K	ADDVIGPEVEK	L			File830 Spectrum81183 scans: 11288	63464.2	54555.1	66458.4	55117.3	60015.3	52449.1	48279.4	52671.2
6	Pavir.J14626.1	Pavir.J14626.1	14528	52574	505	505	19	19	60.8	293622	1	1	1	1053.08	2104.14	2	2104.15	-0.0061	0	71.74		30	3.8e-06	K	LVSAMPNGSVTLLENVR	F	Deamidated (NQ)	0.00000010000000000.0	File828 Spectrum43486 scans: 23201	56996	54095.7	45806.5	41930.4	36261.6	51998.1	39976.2	47850.3
6	Pavir.J14626.1	Pavir.J14626.1	14528	52574	505	505	19	19	60.8	297107	1	1	1	707.721	2120.14	3	2120.15	-0.0035	0	75.23	19	30	1.7e-06	K	LVSAMPNGSVTLLENVR	F	Deamidated (NQ); Oxidation (M)	0.00003010000000000.0	File844 Spectrum414330 scans: 18924	49967.4	43580.2	34908	26512.1	31438.7	28329.3	25928.5	32221.6
6	Pavir.J14626.1	Pavir.J14626.1	14528	52574	505	505	19	19	60.8	293639	1	1	1	1053.08	2104.15	2	2104.15	-0.0005	0	79.6		30	5.9e-07	K	LVSAMPNGSVTLLENVR	F	Deamidated (NQ)	0.00000010000000000.0	File827 Spectrum18950 scans: 23348	44362	46127.1	42342.1	33238.3	32592	46332.5	33542.4	39632.3
6	Pavir.J14626.1	Pavir.J14626.1	14528	52574	505	505	19	19	60.8	297127	1	1	1	707.722	2120.14	3	2120.15	-0.0003	0	69.12	19	30	6.8e-06	K	LVSAMPNGSVTLLENVR	F	Deamidated (NQ); Oxidation (M)	0.00003010000000000.0	File827 Spectrum15197 scans: 19345	43354.9	39807.8	31480.9	37123.2	31639.4	24274.2	28070	39262.4
6	Pavir.J14626.1	Pavir.J14626.1	14528	52574	505	505	19	19	60.8	293645	1	1	1	1053.08	2104.15	2	2104.15	0.0003	0	74.31		30	2e-06	K	LVSAMPNGSVTLLENVR	F	Deamidated (NQ)	0.00000010000000000.0	File827 Spectrum18112 scans: 22454	41640.7	48955.3	42853	42561	35765.7	41041	31677.6	34598.4
6	Pavir.J14626.1	Pavir.J14626.1	14528	52574	505	505	19	19	60.8	293629	1	1	1	1053.08	2104.15	2	2104.15	-0.0022	0	81.39		30	3.9e-07	K	LVSAMPNGSVTLLENVR	F	Deamidated (NQ)	0.00000010000000000.0	File827 Spectrum18562 scans: 22934	40727.2	34420	31363.3	24840.4	26127.1	26463.9	20766.3	24653.9
6	Pavir.J14626.1	Pavir.J14626.1	14528	52574	505	505	19	19	60.8	293634	1	1	1	1053.08	2104.15	2	2104.15	-0.0017	0	78.49		30	7.6e-07	K	LVSAMPNGSVTLLENVR	F	Deamidated (NQ)	0.00000010000000000.0	File827 Spectrum19040 scans: 23444	40253.3	49072.8	40015.4	34884.6	30096.8	43279.5	27309.1	30730.5
6	Pavir.J14626.1	Pavir.J14626.1	14528	52574	505	505	19	19	60.8	297099	1	1	1	1061.08	2120.14	2	2120.15	-0.0052	0	73.17	18	30	2.7e-06	K	LVSAMPNGSVTLLENVR	F	Deamidated (NQ); Oxidation (M)	0.00003010000000000.0	File844 Spectrum414074 scans: 18650	36635.3	40615.4	30399.9	28089.9	22888.3	25537	21176.8	24665.1
6	Pavir.J14626.1	Pavir.J14626.1	14528	52574	505	505	19	19	60.8	293640	1	1	1	702.391	2104.15	3	2104.15	-0.0002	0	54.53		30	0.00019	K	LVSAMPNGSVTLLENVR	F	Deamidated (NQ)	0.00000010000000000.0	File827 Spectrum18558 scans: 22930	33211.5	30184.9	22127.3	25507.6	22636.8	34256.4	26793.6	41246.8
6	Pavir.J14626.1	Pavir.J14626.1	14528	52574	505	505	19	19	60.8	214542	1	1	1	890.5	1778.99	2	1778.99	-0.0015	0	45.16	22	29	0.0012	K	ADDVIGPEVEK	L			File829 Spectrum57253 scans: 11784	32531.8	29890.4	32419.2	26657.9	30890.4	28673.6	23708.9	25068.7
6	Pavir.J14626.1	Pavir.J14626.1	14528	52574	505	505	19	19	60.8	293624	1	1	1	1053.08	2104.15	2	2104.15	-0.0049	0	90.77		30	4.8e-08	K	LVSAMPNGSVTLLENVR	F	Deamidated (NQ)	0.00000010000000000.0	File828 Spectrum43400 scans: 23109	27515.8	36704	29662.7	24657.8	22120.9	23429.6	20266.1	24048.5
6	Pavir.J14626.1	Pavir.J14626.1	14528	52574	505	505	19	19	60.8	293605	1	1	1	1053.08	2104.14	2	2104.15	-0.0102	0	53.48		30	0.00026	K	LVSAMPNGSVTLLENVR	F	Deamidated (NQ)	0.00000010000000000.0	File828 Spectrum44502 scans: 24284	25664.3	27343.3	23827.2	21568.6	22418.6	25351.4	19989.1	21335.3
6	Pavir.J14626.1	Pavir.J14626.1	14528	52574	505	505	19	19	60.8	214534	1	1	1	594.002	1778.98	3	1778.99	-0.0042	0	37.16	15	29	0.0082	K	ADDVIGPEVEK	L			File829 Spectrum57298 scans: 11832	24400	22776.8	21217.3	18158.7	18033	21668	16355.1	17646.8
6	Pavir.J14626.1	Pavir.J14626.1	14528	52574	505	505	19	19	60.8	293627	1	1	1	1053.08	2104.15	2	2104.15	-0.0027	0	88.5		30	7.9e-08	K	LVSAMPNGSVTLLENVR	F	Deamidated (NQ)	0.00000010000000000.0	File827 Spectrum18477 scans: 22843	23888.5	25869.2	20868.1	19559.7	17880	21823.7	16058	18072.8
6	Pavir.J14626.1	Pavir.J14626.1	14528	52574	505	505	19	19	60.8	293623	1	1	1	1053.08	2104.15	2	2104.15	-0.0051	0	38.54		30	0.0079	K	LVSAMPNGSVTLLENVR	F	Deamidated (NQ)	0.00000010000000000.0	File828 Spectrum42936 scans: 22614	23509.5	27228.3	18972.7	21942.9	19042	23745.2	15471.3	19149.1
6	Pavir.J14626.1	Pavir.J14626.1	14528	52574	505	505	19	19	60.8	293608	1	1	1	1053.08	2104.14	2	2104.15	-0.0095	0	30.9	21	30	0.045	K	LVSAMPNGSVTLLENVR	F	Deamidated (NQ)	0.00000010000000000.0	File828 Spectrum44544 scans: 24329	23184.1	23983.3	23303.9	19120.3	19667.7	23347.7	18584.6	17467.4
6	Pavir.J14626.1	Pavir.J14626.1	14528	52574	505	505	19	19	60.8	293602	1	1	1	1053.08	2104.14	2	2104.15	-0.0124	0	54.11		30	0.00022	K	LVSAMPNGSVTLLENVR	F	Deamidated (NQ)	0.00000010000000000.0	File828 Spectrum44518 scans: 24301	22266.8	21446.8	21257.4	19388.1	18433.3	23026.7	18859.5	17321.6
6	Pavir.J14626.1	Pavir.J14626.1	14528	52574	505	505	19	19	60.8	297129	1	1	1	1061.08	2120.15	2	2120.15	0.0005	0	80.71		30	4.8e-07	K	LVSAMPNGSVTLLENVR	F	Deamidated (NQ); Oxidation (M)	0.00003010000000000.0	File844 Spectrum414306 scans: 18898	22028.4	21409.1	15052.9	13978.9	12049.6	14692.1	12552.3	14238.5
6	Pavir.J14626.1	Pavir.J14626.1	14528	52574	505	505	19	19	60.8	214536	1	1	1	594.002	1778.98	3	1778.99	-0.0033	0	42.96		29	0.0021	K	ADDVIGPEVEK	L			File829 Spectrum56875 scans: 11381	21443.6	19662.9	21508.9	14136.1	13481.3	19174.2	13623.2	10921
6	Pavir.J14626.1	Pavir.J14626.1	14528	52574	505	505	19	19	60.8	293651	1	1	1	702.391	2104.15	3	2104.15	0.0018	0	63.55		30	2.4e-05	K	LVSAMPNGSVTLLENVR	F	Deamidated (NQ)	0.00000010000000000.0	File827 Spectrum18469 scans: 22835	20894.7	28605.2	25346.5	31347.9	25220	17942.2	20293.4	18184.9
6	Pavir.J14626.1	Pavir.J14626.1	14528	52574	505	505	19	19	60.8	293613	1	1	1	702.388	2104.14	3	2104.15	-0.0076	0	42.53		30	0.0032	K	LVSAMPNGSVTLLENVR	F	Deamidated (NQ)	0.00000010000000000.0	File828 Spectrum42899 scans: 22575	19952	23019.1	8543.68	16379.4	12589.7	15408.8	11976	15326
6	Pavir.J14626.1	Pavir.J14626.1	14528	52574	505	505	19	19	60.8	297137	1	1	1	1061.08	2120.15	2	2120.15	0.0027	0	40.07	24	30	0.0054	K	LVSAMPNGSVTLLENVR	F	Deamidated (NQ); Oxidation (M)	0.00003010000000000.0	File827 Spectrum15159 scans: 19304	19927.4	25343.5	16676.9	15470.6	14133.8	14709.2	14613.9	16626.5
6	Pavir.J14626.1	Pavir.J14626.1	14528	52574	505	505	19	19	60.8	293609	1	1	1	1053.08	2104.14	2	2104.15	-0.0093	0	73.14		30	2.7e-06	K	LVSAMPNGSVTLLENVR	F	Deamidated (NQ)	0.00000010000000000.0	File828 Spectrum42888 scans: 22563	19869	22205.4	18351.4	17863.7	17178.5	22577.4	15670.5	18364.3
6	Pavir.J14626.1	Pavir.J14626.1	14528	52574	505	505	19	19	60.8	297125	1	1	1	1061.08	2120.14	2	2120.15	-0.0005	0	50.5	24	30	0.00049	K	LVSAMPNGSVTLLENVR	F	Deamidated (NQ); Oxidation (M)	0.00003010000000000.0	File827 Spectrum15249 scans: 19400	19465.1	20080.8	19058.5	18244.4	19909.3	19792.1	15102.4	18902.4
6	Pavir.J14626.1	Pavir.J14626.1	14528	52574	505	505	19	19	60.8	293604	1	1	1	1053.08	2104.14	2	2104.15	-0.0112	0	45.26		30	0.0017	K	LVSAMPNGSVTLLENVR	F	Deamidated (NQ)	0.00000010000000000.0	File828 Spectrum44442 scans: 24220	18992.6	23473.4	19997.2	17732	17722.2	21481.2	16877	18554.9
6	Pavir.J14626.1	Pavir.J14626.1	14528	52574	505	505	19	19	60.8	293647	1	1	1	702.391	2104.15	3	2104.15	0.0009	0	46.42		30	0.0013	K	LVSAMPNGSVTLLENVR	F	Deamidated (NQ)	0.00000010000000000.0	File827 Spectrum18107 scans: 22449	17986	20011.3	18107.1	14690.3	13713.7	22454.9	14540.7	17411.3
6	Pavir.J14626.1	Pavir.J14626.1	14528	52574	505	505	19	19	60.8	293644	1	1	1	1053.08	2104.15	2	2104.15	0.0003	0	81.17		30	4.2e-07	K	LVSAMPNGSVTLLENVR	F	Deamidated (NQ)	0.00000010000000000.0	File827 Spectrum18465 scans: 22830	17547.3	20931.1	16372.2	14576.5	13043.7	14124.8	11462.5	15247.5
6	Pavir.J14626.1	Pavir.J14626.1	14528	52574	505	505	19	19	60.8	214528	1	1	1	890.498	1778.98	2	1778.99	-0.0053	0	52.82	22	29	0.00022	K	ADDVIGPEVEK	L			File830 Spectrum81192 scans: 11297	17284	16528.5	16000.4	13027.7	14251	15665	12456.8	12668.9
6	Pavir.J14626.1	Pavir.J14626.1	14528	52574	505	505	19	19	60.8	293610	1	1	1	1053.08	2104.14	2	2104.15	-0.0088	0	79.5		30	6.4e-07	K	LVSAMPNGSVTLLENVR	F	Deamidated (NQ)	0.00000010000000000.0	File828 Spectrum42953 scans: 22632	17253.3	21748.8	17838.8	16247.4	15423.8	16952.9	12912.9	15763.2
6	Pavir.J14626.1	Pavir.J14626.1	14528	52574	505	505	19	19	60.8	293619	1	1	1	1053.08	2104.14	2	2104.15	-0.0066	0	35.64		30	0.016	K	LVSAMPNGSVTLLENVR	F	Deamidated (NQ)	0.00000010000000000.0	File828 Spectrum44451 scans: 24230	16668.6	18940	17577.8	13844.8	14836.6	16852.1	12766.4	15505.4
6	Pavir.J14626.1	Pavir.J14626.1	14528	52574	505	505	19	19	60.8	214539	1	1	1	890.5	1778.98	2	1778.99	-0.0028	0	48.17	23	29	0.00062	K	ADDVIGPEVEK	L			File830 Spectrum81180 scans: 11284	16472.1	14513.9	14766.1	13526.7	14134.4	14650.6	11921.6	12153.2
6	Pavir.J14626.1	Pavir.J14626.1	14528	52574	505	505	19	19	60.8	297123	1	1	1	707.722	2120.14	3	2120.15	-0.0011	0	79.07	19	30	6.8e-07	K	LVSAMPNGSVTLLENVR	F	Deamidated (NQ); Oxidation (M)	0.00003010000000000.0	File827 Spectrum15423 scans: 19586	16387	11303	13979.7	7806.57	9918.59	4957.86	8290.83	10916.5
6	Pavir.J14626.1	Pavir.J14626.1	14528	52574	505	505	19	19	60.8	297138	1	1	1	1061.08	2120.15	2	2120.15	0.0029	0	51.11	17	30	0.00043	K	LVSAMPNGSVTLLENVR	F	Deamidated (NQ); Oxidation (M)	0.00003010000000000.0	File827 Spectrum15268 scans: 19420	15342.7	15863	14023.5	12673	10816.2	11474.8	11062.5	13745.2
6	Pavir.J14626.1	Pavir.J14626.1	14528	52574	505	505	19	19	60.8	293614	1	1	1	1053.08	2104.14	2	2104.15	-0.0075	0	72.51		30	3.3e-06	K	LVSAMPNGSVTLLENVR	F	Deamidated (NQ)	0.00000010000000000.0	File828 Spectrum43531 scans: 23249	14297.7	18527.3	15296.2	11038.5	11785.6	12120.1	10419.3	12758.6
6	Pavir.J14626.1	Pavir.J14626.1	14528	52574	505	505	19	19	60.8	214541	1	1	1	890.5	1778.98	2	1778.99	-0.0027	0	50.9		29	0.00033	K	ADDVIGPEVEK	L			File830 Spectrum81207 scans: 11313	13912.7	12530.9	12080.7	10146.9	12572.6	13317.7	9903.58	11060.1
6	Pavir.J14626.1	Pavir.J14626.1	14528	52574	505	505	19	19	60.8	214535	1	1	1	594.002	1778.98	3	1778.99	-0.0042	0	48.79	16	29	0.00056	K	ADDVIGPEVEK	L			File829 Spectrum56324 scans: 10793	13887.9	17927.1	12026.9	12666.6	15140.1	10275	9020.17	13083.7
6	Pavir.J14626.1	Pavir.J14626.1	14528	52574	505	505	19	19	60.8	297097	1	1	1	707.721	2120.14	3	2120.15	-0.0057	0	77.6	18	30	9.8e-07	K	LVSAMPNGSVTLLENVR	F	Deamidated (NQ); Oxidation (M)	0.00003010000000000.0	File844 Spectrum414785 scans: 19409	13553.5	14831.4	6007.32	15421.6	4666.63	7205.02	8587.26	8937.74
6	Pavir.J14626.1	Pavir.J14626.1	14528	52574	505	505	19	19	60.8	214523	1	1	1	594.001	1778.98	3	1778.99	-0.0063	0	38.03	21	29	0.0065	K	ADDVIGPEVEK	L			File829 Spectrum56474 scans: 10953	13180.6	15369.9	9554.22	7834.91	12207.9	6989.51	6198.46	14417.9
6	Pavir.J14626.1	Pavir.J14626.1	14528	52574	505	505	19	19	60.8	293636	1	1	1	1053.08	2104.15	2	2104.15	-0.0012	0	51.22		30	0.00041	K	LVSAMPNGSVTLLENVR	F	Deamidated (NQ)	0.00000010000000000.0	File827 Spectrum18404 scans: 22765	12810	14223	10428.7	9623.07	9489.84	10480.4	10524.8	9797.65
6	Pavir.J14626.1	Pavir.J14626.1	14528	52574	505	505	19	19	60.8	293617	1	1	1	702.388	2104.14	3	2104.15	-0.007	0	73.32		30	2.7e-06	K	LVSAMPNGSVTLLENVR	F	Deamidated (NQ)	0.00000010000000000.0	File828 Spectrum42944 scans: 22623	12228.7	14472.9	12414	16184.4	5538.26	10033.3	9698.62	13487.3
6	Pavir.J14626.1	Pavir.J14626.1	14528	52574	505	505	19	19	60.8	293637	1	1	1	1053.08	2104.15	2	2104.15	-0.001	0	41.37		30	0.004	K	LVSAMPNGSVTLLENVR	F	Deamidated (NQ)	0.00000010000000000.0	File827 Spectrum18591 scans: 22965	11508.2	11271.4	9236.9	9125.4	8995.15	11005.9	7763.06	9814.47
6	Pavir.J14626.1	Pavir.J14626.1	14528	52574	505	505	19	19	60.8	297108	1	1	1	707.721	2120.14	3	2120.15	-0.0033	0	34.94		30	0.018	K	LVSAMPNGSVTLLENVR	F	Deamidated (NQ); Oxidation (M)	0.00003010000000000.0	File845 Spectrum433582 scans: 14173	11423.2	14598.1	12072.8	10192.1	10776.7	11177.3	10544.7	8401.83
6	Pavir.J14626.1	Pavir.J14626.1	14528	52574	505	505	19	19	60.8	214525	1	1	1	594.001	1778.98	3	1778.99	-0.0059	0	44.21	22	29	0.0016	K	ADDVIGPEVEK	L			File829 Spectrum56427 scans: 10903	10982.5	19320.8	9619.53	8658.1	12313.7	9105.56	4880.28	15942.6
6	Pavir.J14626.1	Pavir.J14626.1	14528	52574	505	505	19	19	60.8	214524	1	1	1	594.001	1778.98	3	1778.99	-0.0063	0	35.96	22	29	0.01	K	ADDVIGPEVEK	L			File832 Spectrum128211 scans: 11463	10861	13902.8	10416.1	11578	8859.28	8518.31	7453.46	11312.3
6	Pavir.J14626.1	Pavir.J14626.1	14528	52574	505	505	19	19	60.8	297128	1	1	1	707.722	2120.15	3	2120.15	0.0004	0	49.98	17	30	0.00056	K	LVSAMPNGSVTLLENVR	F	Deamidated (NQ); Oxidation (M)	0.00003010000000000.0	File827 Spectrum15289 scans: 19443	10258.1	7512.71	7986.57	8811.23	14164.8	10316.2	11099.8	11682.3
6	Pavir.J14626.1	Pavir.J14626.1	14528	52574	505	505	19	19	60.8	297096	1	1	1	707.721	2120.14	3	2120.15	-0.0057	0	69.05	18	30	7e-06	K	LVSAMPNGSVTLLENVR	F	Deamidated (NQ); Oxidation (M)	0.00003010000000000.0	File844 Spectrum414484 scans: 19088	9221.23	8564.52	9272.82	5511.96	4973.41	6949.41	5161.21	6833.35
6	Pavir.J14626.1	Pavir.J14626.1	14528	52574	505	505	19	19	60.8	293615	1	1	1	702.388	2104.14	3	2104.15	-0.0074	0	45.61		30	0.0016	K	LVSAMPNGSVTLLENVR	F	Deamidated (NQ)	0.00000010000000000.0	File828 Spectrum42857 scans: 22530	7712.92	7831.97	8445.31	7654.87	6315.26	9547.22	3205.15	6250.36
6	Pavir.J14626.1	Pavir.J14626.1	14528	52574	505	505	19	19	60.8	297091	1	1	1	707.72	2120.14	3	2120.15	-0.0068	0	54.73		30	0.00019	K	LVSAMPNGSVTLLENVR	F	Deamidated (NQ); Oxidation (M)	0.00003010000000000.0	File844 Spectrum414696 scans: 19314	7208.74	8402.39	8272.84	6936.87	5105.01	3931.82	6271.33	6132.64
6	Pavir.J14626.1	Pavir.J14626.1	14528	52574	505	505	19	19	60.8	293641	1	1	1	1053.08	2104.15	2	2104.15	-0.0002	0	40.49		30	0.0049	K	LVSAMPNGSVTLLENVR	F	Deamidated (NQ)	0.00000010000000000.0	File827 Spectrum19091 scans: 23498	7079.01	7884.06	6217	4298.79	7814.38	5517.67	3613.65	6373.69
6	Pavir.J14626.1	Pavir.J14626.1	14528	52574	505	505	19	19	60.8	214546	1	1	1	594.004	1778.99	3	1778.99	0.0034	0	44.7		28	0.0013	K	ADDVIGPEVEK	L			File831 Spectrum104974 scans: 11664	6795.56	8666.69	8413.13	6655.82	5996.92	6296.11	5620.43	8159.66
6	Pavir.J14626.1	Pavir.J14626.1	14528	52574	505	505	19	19	60.8	297135	1	1	1	707.723	2120.15	3	2120.15	0.0018	0	53.87		30	0.00022	K	LVSAMPNGSVTLLENVR	F	Deamidated (NQ); Oxidation (M)	0.00003010000000000.0	File843 Spectrum390631 scans: 18635	6728.55	11544.9	6000.4	6236.53	4415.89	5695.88	6420.54	6824.38
6	Pavir.J14626.1	Pavir.J14626.1	14528	52574	505	505	19	19	60.8	293616	1	1	1	702.388	2104.14	3	2104.15	-0.0074	0	54.64		30	0.0002	K	LVSAMPNGSVTLLENVR	F	Deamidated (NQ)	0.00000010000000000.0	File828 Spectrum44550 scans: 24336	6598.2	9449.56	10415.1	6282.81	7891.83	6369.43	4930.68	6657.33
6	Pavir.J14626.1	Pavir.J14626.1	14528	52574	505	505	19	19	60.8	293611	1	1	1	702.388	2104.14	3	2104.15	-0.0087	0	58.77		30	7.5e-05	K	LVSAMPNGSVTLLENVR	F	Deamidated (NQ)	0.00000010000000000.0	File828 Spectrum43549 scans: 23268	6415.99	6725.65	7370.55	6360.3	4309.72	4566.79	4884.86	4445.32
6	Pavir.J14626.1	Pavir.J14626.1	14528	52574	505	505	19	19	60.8	297088	1	1	1	707.72	2120.14	3	2120.15	-0.0077	0	61.73	17	30	3.9e-05	K	LVSAMPNGSVTLLENVR	F	Deamidated (NQ); Oxidation (M)	0.00003010000000000.0	File828 Spectrum39950 scans: 19429	5047.15	4102.37	6755.16	3467.5	5240.25	4943.08	3660.96	5954.38
6	Pavir.J14626.1	Pavir.J14626.1	14528	52574	505	505	19	19	60.8	297130	1	1	1	707.723	2120.15	3	2120.15	0.0008	0	32.17		30	0.034	K	LVSAMPNGSVTLLENVR	F	Deamidated (NQ); Oxidation (M)	0.00003010000000000.0	File827 Spectrum15340 scans: 19497	4946.31	10317.1	4225.61	6625.72	5961.42	5741.97	7697.27	4839.97
6	Pavir.J14626.1	Pavir.J14626.1	14528	52574	505	505	19	19	60.8	297109	1	1	1	707.721	2120.14	3	2120.15	-0.0031	0	43.1	18	30	0.0027	K	LVSAMPNGSVTLLENVR	F	Deamidated (NQ); Oxidation (M)	0.00003010000000000.0	File845 Spectrum437951 scans: 18833	4758.19	8062.59	4814.79	3869.08	4093.29	4007.77	2556.4	3242.34
6	Pavir.J14626.1	Pavir.J14626.1	14528	52574	505	505	19	19	60.8	297110	1	1	1	707.721	2120.14	3	2120.15	-0.0031	0	63.96	18	30	2.2e-05	K	LVSAMPNGSVTLLENVR	F	Deamidated (NQ); Oxidation (M)	0.00003010000000000.0	File845 Spectrum437907 scans: 18786	4432.3	7635.91	4254.7	3376.48	3563.35	4668.93	2791.62	4815.3
6	Pavir.J14626.1	Pavir.J14626.1	14528	52574	505	505	19	19	60.8	297306	1	1	1	708.05	2121.13	3	2121.13	-0.0011	0	35.35	17	30	0.016	K	LVSAMPNGSVTLLENVR	F	2 Deamidated (NQ); Oxidation (M)	0.00003010000000100.0	File841 Spectrum345426 scans: 20109	4117.74	5021.85	2840.1	3549.93	3062.42	2699.61	2594.4	4157.19
6	Pavir.J14626.1	Pavir.J14626.1	14528	52574	505	505	19	19	60.8	293612	1	1	1	702.388	2104.14	3	2104.15	-0.0087	0	63.11		30	2.8e-05	K	LVSAMPNGSVTLLENVR	F	Deamidated (NQ)	0.00000010000000000.0	File828 Spectrum44444 scans: 24223	3893.88	12880.6	8666.12	11665.8	7401.08	9634.21	7337.58	7559.85
6	Pavir.J14626.1	Pavir.J14626.1	14528	52574	505	505	19	19	60.8	297095	1	1	1	707.72	2120.14	3	2120.15	-0.006	0	52.68		30	0.00031	K	LVSAMPNGSVTLLENVR	F	Deamidated (NQ); Oxidation (M)	0.00003010000000000.0	File845 Spectrum437923 scans: 18803	3772.61	8050.24	5878.74	3898.84	4624.91	6167.4	4494.13	5007.02
6	Pavir.J14626.1	Pavir.J14626.1	14528	52574	505	505	19	19	60.8	297090	1	1	1	707.72	2120.14	3	2120.15	-0.0068	0	37.94	15	30	0.0092	K	LVSAMPNGSVTLLENVR	F	Deamidated (NQ); Oxidation (M)	0.00003010000000000.0	File828 Spectrum40420 scans: 19930	3770.18	4096.44	3224.88	3012.08	3473.4	2667.97	3796.4	4510.35
6	Pavir.J14626.1	Pavir.J14626.1	14528	52574	505	505	19	19	60.8	297304	1	1	1	708.05	2121.13	3	2121.13	-0.0025	0	38.69		30	0.0075	K	LVSAMPNGSVTLLENVR	F	2 Deamidated (NQ); Oxidation (M)	0.00003010000000100.0	File841 Spectrum345386 scans: 20067	3456.59	3401.1	3593.3	3656.99	3573.01	3125.61	2894.48	3409.39
6	Pavir.J14626.1	Pavir.J14626.1	14528	52574	505	505	19	19	60.8	214543	1	1	1	594.003	1778.99	3	1778.99	-0.0013	0	40.41	15	29	0.0037	K	ADDVIGPEVEK	L			File828 Spectrum31569 scans: 10489	2906.09	8444.8	4658.55	5011.66	5855.83	3815.57	3179.27	7572.19
6	Pavir.J14626.1	Pavir.J14626.1	14528	52574	505	505	19	19	60.8	214510	1	1	1	593.999	1778.98	3	1778.99	-0.0116	0	46.51	16	29	0.00097	K	ADDVIGPEVEK	L			File828 Spectrum31583 scans: 10504	2846.76	7050.32	4382.45	4036.93	5384.93	3954.4	3153.71	7285.17
6	Pavir.J14626.1	Pavir.J14626.1	14528	52574	505	505	19	19	60.8	297102	1	1	1	707.721	2120.14	3	2120.15	-0.0044	0	53.38	17	30	0.00026	K	LVSAMPNGSVTLLENVR	F	Deamidated (NQ); Oxidation (M)	0.00003010000000000.0	File845 Spectrum437978 scans: 18862	2533.99	5772.41	4763.54	3362.02	3696.84	4424.68	3216.71	2509.11
6	Pavir.J14626.1	Pavir.J14626.1	14528	52574	505	505	19	19	60.8	297305	1	1	1	708.05	2121.13	3	2121.13	-0.0016	0	30.87	16	30	0.044	K	LVSAMPNGSVTLLENVR	F	2 Deamidated (NQ); Oxidation (M)	0.00003010000000100.0	File841 Spectrum345403 scans: 20085	2533.75	4348.87	3855.76	4169.53	2518.74	3914.55	2148.14	4103.38
6	Pavir.J14626.1	Pavir.J14626.1	14528	52574	505	505	19	19	60.8	250959	1	1	1	959.539	1917.06	2	1917.06	0.0031	0	38.06		30	0.0084	K	ELPGVVALDEATTVTV	-			File840 Spectrum327741 scans: 26169	1272.24	2037.16	1518.02	1352.73	954.749	843.539	1638.81	1470.94
6	Pavir.J14626.1	Pavir.J14626.1	14528	52574	505	505	19	19	60.8	250953	1	1	1	959.537	1917.06	2	1917.06	-0.002	0	54.58	23	30	0.0002	K	ELPGVVALDEATTVTV	-			File838 Spectrum283077 scans: 25805	333.217	929.855	196.167	326.187	232.569	242.658	229.521	315.489
7	Pavir.Aa02225.1	Pavir.Aa02225.1	13644	18424	546	546	7	7	65	220175	1	1	1	600.682	1799.03	3	1799.03	-0.0035	0	45.11	21	29	0.0015	R	SAPAFIELDTK	L			File837 Spectrum250476 scans: 14803	8.39207e+06	4.73494e+06	5.99826e+06	4.59131e+06	4.94274e+06	5.23242e+06	3.21346e+06	2.88582e+06
7	Pavir.Aa02225.1	Pavir.Aa02225.1	13644	18424	546	546	7	7	65	132059	1	1	1	763.903	1525.79	2	1525.79	0.0011	0	47.07	19	27	0.00059	R	AVAMSATDGLMR	G			File843 Spectrum385136 scans: 12774	7.47683e+06	7.858e+06	6.67205e+06	5.21883e+06	7.71199e+06	5.0772e+06	4.75435e+06	5.52498e+06
7	Pavir.Aa02225.1	Pavir.Aa02225.1	13644	18424	546	546	7	7	65	220176	1	1	1	600.683	1799.03	3	1799.03	-0.0033	0	45.63	20	30	0.0014	R	SAPAFIELDTK	L			File837 Spectrum250416 scans: 14739	6.85458e+06	5.67189e+06	4.99447e+06	4.40753e+06	5.59785e+06	5.54852e+06	4.29594e+06	3.92399e+06
7	Pavir.Aa02225.1	Pavir.Aa02225.1	13644	18424	546	546	7	7	65	132061	1	1	1	763.903	1525.79	2	1525.79	0.0013	0	44.15		27	0.0012	R	AVAMSATDGLMR	G			File843 Spectrum385226 scans: 12870	6.06121e+06	5.8299e+06	5.59523e+06	4.13565e+06	6.1705e+06	5.54296e+06	3.93308e+06	4.80073e+06
7	Pavir.Aa02225.1	Pavir.Aa02225.1	13644	18424	546	546	7	7	65	132065	1	1	1	763.903	1525.79	2	1525.79	0.0024	0	47.39	18	27	0.00054	R	AVAMSATDGLMR	G			File843 Spectrum385316 scans: 12966	4.68957e+06	4.32986e+06	4.97283e+06	4.10169e+06	4.3839e+06	3.47497e+06	3.32025e+06	3.45199e+06
7	Pavir.Aa02225.1	Pavir.Aa02225.1	13644	18424	546	546	7	7	65	137524	1	1	1	771.897	1541.78	2	1541.78	-0.0048	0	34.81	15	26	0.0069	R	AVAMSATDGLMR	G	Oxidation (M)	0.000000000030.0	File837 Spectrum244822 scans: 8772	4.16659e+06	3.90816e+06	3.48256e+06	2.52492e+06	3.11544e+06	3.12922e+06	2.37327e+06	2.62683e+06
7	Pavir.Aa02225.1	Pavir.Aa02225.1	13644	18424	546	546	7	7	65	137553	1	1	1	771.898	1541.78	2	1541.78	-0.0032	0	49.69		26	0.00026	R	AVAMSATDGLMR	G	Oxidation (M)	0.000300000000.0	File837 Spectrum245181 scans: 9155	4.03418e+06	3.59539e+06	3.37571e+06	3.30773e+06	4.19867e+06	2.62273e+06	1.96493e+06	2.50351e+06
7	Pavir.Aa02225.1	Pavir.Aa02225.1	13644	18424	546	546	7	7	65	220164	1	1	1	600.682	1799.02	3	1799.03	-0.0041	0	44.58	21	30	0.0019	R	SAPAFIELDTK	L			File840 Spectrum317498 scans: 15244	3.80809e+06	2.74603e+06	3.47376e+06	2.3684e+06	3.2556e+06	2.84516e+06	1.53152e+06	1.30389e+06
7	Pavir.Aa02225.1	Pavir.Aa02225.1	13644	18424	546	546	7	7	65	250146	1	1	1	639.066	1914.18	3	1914.18	-0.0042	0	31.77		25	0.012	K	LPYIYNALIVK	S			File834 Spectrum190056 scans: 26665	3.66243e+06	3.52332e+06	1.89871e+06	2.14279e+06	1.80135e+06	1.90857e+06	1.69614e+06	2.43848e+06
7	Pavir.Aa02225.1	Pavir.Aa02225.1	13644	18424	546	546	7	7	65	137547	1	1	1	771.898	1541.78	2	1541.78	-0.0035	0	30		26	0.023	R	AVAMSATDGLMR	G	Oxidation (M)	0.000000000030.0	File837 Spectrum244912 scans: 8868	3.37888e+06	3.01264e+06	2.14226e+06	2.7258e+06	2.19952e+06	2.53002e+06	1.56974e+06	2.08756e+06
7	Pavir.Aa02225.1	Pavir.Aa02225.1	13644	18424	546	546	7	7	65	132063	1	1	1	763.903	1525.79	2	1525.79	0.0017	0	47.54		27	0.00053	R	AVAMSATDGLMR	G			File843 Spectrum385406 scans: 13062	3.30173e+06	2.97001e+06	3.3869e+06	2.59072e+06	3.273e+06	3.09023e+06	2.39462e+06	2.23219e+06
7	Pavir.Aa02225.1	Pavir.Aa02225.1	13644	18424	546	546	7	7	65	250166	1	1	1	639.067	1914.18	3	1914.18	-0.0019	0	35.69	15	25	0.0046	K	LPYIYNALIVK	S			File835 Spectrum215279 scans: 26198	2.69023e+06	1.73087e+06	1.59631e+06	1.47545e+06	1.34811e+06	837371	916184	1.5696e+06
7	Pavir.Aa02225.1	Pavir.Aa02225.1	13644	18424	546	546	7	7	65	137538	1	1	1	771.898	1541.78	2	1541.78	-0.0038	0	48.78		26	0.00029	R	AVAMSATDGLMR	G	Oxidation (M)	0.000300000000.0	File837 Spectrum245091 scans: 9059	2.39671e+06	2.7505e+06	2.01531e+06	1.91001e+06	2.17677e+06	1.71221e+06	1.40505e+06	1.61556e+06
7	Pavir.Aa02225.1	Pavir.Aa02225.1	13644	18424	546	546	7	7	65	137565	1	1	1	771.898	1541.78	2	1541.78	-0.0027	0	38.19		26	0.0035	R	AVAMSATDGLMR	G	Oxidation (M)	0.000300000000.0	File837 Spectrum245272 scans: 9252	2.33464e+06	2.17554e+06	2.02485e+06	2.17288e+06	2.49092e+06	1.63745e+06	1.32657e+06	1.71535e+06
7	Pavir.Aa02225.1	Pavir.Aa02225.1	13644	18424	546	546	7	7	65	250147	1	1	1	639.066	1914.18	3	1914.18	-0.0041	0	36.09		25	0.0043	K	LPYIYNALIVK	S			File834 Spectrum190146 scans: 26761	2.24415e+06	2.10389e+06	1.16395e+06	2.11667e+06	1.4374e+06	1.1063e+06	1.34024e+06	2.21313e+06
7	Pavir.Aa02225.1	Pavir.Aa02225.1	13644	18424	546	546	7	7	65	143162	1	1	1	779.896	1557.78	2	1557.78	-0.0022	0	32.16		26	0.013	R	AVAMSATDGLMR	G	2 Oxidation (M)	0.000300000030.0	File836 Spectrum221257 scans: 7194	2.21408e+06	2.00934e+06	1.33305e+06	1.5821e+06	1.44433e+06	1.19356e+06	704088	1.15365e+06
7	Pavir.Aa02225.1	Pavir.Aa02225.1	13644	18424	546	546	7	7	65	132064	1	1	1	763.903	1525.79	2	1525.79	0.0021	0	51.39		27	0.00022	R	AVAMSATDGLMR	G			File843 Spectrum385496 scans: 13158	2.16712e+06	2.07481e+06	1.79331e+06	1.77047e+06	1.89773e+06	1.83203e+06	1.39792e+06	1.66602e+06
7	Pavir.Aa02225.1	Pavir.Aa02225.1	13644	18424	546	546	7	7	65	143211	1	1	1	779.896	1557.78	2	1557.78	-0.0013	0	42.16		26	0.0013	R	AVAMSATDGLMR	G	2 Oxidation (M)	0.000300000030.0	File836 Spectrum221167 scans: 7098	2.0908e+06	1.81769e+06	1.2942e+06	1.47971e+06	1.28179e+06	1.28286e+06	575264	1.20186e+06
7	Pavir.Aa02225.1	Pavir.Aa02225.1	13644	18424	546	546	7	7	65	143146	1	1	1	779.896	1557.78	2	1557.78	-0.0028	0	31.86		26	0.015	R	AVAMSATDGLMR	G	2 Oxidation (M)	0.000300000030.0	File836 Spectrum221346 scans: 7289	1.87097e+06	1.61637e+06	1.13837e+06	1.26966e+06	1.29407e+06	936398	624055	1.04771e+06
7	Pavir.Aa02225.1	Pavir.Aa02225.1	13644	18424	546	546	7	7	65	137564	1	1	1	771.898	1541.78	2	1541.78	-0.0027	0	37.53		26	0.0041	R	AVAMSATDGLMR	G	Oxidation (M)	0.000000000030.0	File840 Spectrum311678 scans: 9036	1.72416e+06	1.90755e+06	1.23786e+06	1.34048e+06	1.26218e+06	1.24846e+06	1.15324e+06	1.3734e+06
7	Pavir.Aa02225.1	Pavir.Aa02225.1	13644	18424	546	546	7	7	65	250112	1	1	1	639.066	1914.17	3	1914.18	-0.0057	0	39.74		25	0.0019	K	LPYIYNALIVK	S			File834 Spectrum190236 scans: 26857	1.60744e+06	1.43547e+06	1.22781e+06	1.46778e+06	1.12198e+06	728802	766555	1.10096e+06
7	Pavir.Aa02225.1	Pavir.Aa02225.1	13644	18424	546	546	7	7	65	143179	1	1	1	779.896	1557.78	2	1557.78	-0.0018	0	45.31		26	0.00064	R	AVAMSATDGLMR	G	2 Oxidation (M)	0.000300000030.0	File836 Spectrum221077 scans: 7002	1.57433e+06	2.14666e+06	1.17276e+06	1.2914e+06	1.04295e+06	1.27905e+06	671964	1.0708e+06
7	Pavir.Aa02225.1	Pavir.Aa02225.1	13644	18424	546	546	7	7	65	250109	1	1	1	639.065	1914.17	3	1914.18	-0.0059	0	28.17		26	0.037	K	LPYIYNALIVK	S			File834 Spectrum189966 scans: 26569	1.40712e+06	1.10019e+06	932978	1.3156e+06	918147	853414	691887	1.23886e+06
7	Pavir.Aa02225.1	Pavir.Aa02225.1	13644	18424	546	546	7	7	65	250160	1	1	1	639.067	1914.18	3	1914.18	-0.0028	0	39.79		25	0.0018	K	LPYIYNALIVK	S			File835 Spectrum215369 scans: 26294	1.1724e+06	865419	590002	974484	669233	568080	570509	926511
7	Pavir.Aa02225.1	Pavir.Aa02225.1	13644	18424	546	546	7	7	65	220179	1	1	1	900.52	1799.03	2	1799.03	-0.003	0	49.14		30	0.00061	R	SAPAFIELDTK	L			File840 Spectrum317454 scans: 15197	1.09271e+06	1.07463e+06	949075	834774	902966	956109	807608	708785
7	Pavir.Aa02225.1	Pavir.Aa02225.1	13644	18424	546	546	7	7	65	250099	1	1	1	639.065	1914.17	3	1914.18	-0.0064	0	27.43		26	0.044	K	LPYIYNALIVK	S			File835 Spectrum215189 scans: 26102	1.06314e+06	795065	753244	708904	457514	273457	427201	781659
7	Pavir.Aa02225.1	Pavir.Aa02225.1	13644	18424	546	546	7	7	65	250376	1	1	1	639.393	1915.16	3	1915.16	-0.0075	0	32	22	26	0.014	K	LPYIYNALIVK	S	Deamidated (NQ)	0.00000100000.0	File828 Spectrum42959 scans: 22639	982278	696586	494065	810851	412023	402724	585048	664388
7	Pavir.Aa02225.1	Pavir.Aa02225.1	13644	18424	546	546	7	7	65	143213	1	1	1	520.267	1557.78	3	1557.78	-0.0012	0	41.2	16	26	0.0016	R	AVAMSATDGLMR	G	2 Oxidation (M)	0.000300000030.0	File836 Spectrum221196 scans: 7129	962408	480109	766276	915617	665536	853392	836352	1.02338e+06
7	Pavir.Aa02225.1	Pavir.Aa02225.1	13644	18424	546	546	7	7	65	137559	1	1	1	771.898	1541.78	2	1541.78	-0.0029	0	37.66		26	0.004	R	AVAMSATDGLMR	G	Oxidation (M)	0.000300000000.0	File837 Spectrum245361 scans: 9347	926637	882763	871723	882927	962074	717476	643861	671339
7	Pavir.Aa02225.1	Pavir.Aa02225.1	13644	18424	546	546	7	7	65	137534	1	1	1	771.898	1541.78	2	1541.78	-0.004	0	48.15		26	0.00033	R	AVAMSATDGLMR	G	Oxidation (M)	0.000000000030.0	File843 Spectrum382181 scans: 9622	849780	932573	777689	703500	802596	768323	586016	635463
7	Pavir.Aa02225.1	Pavir.Aa02225.1	13644	18424	546	546	7	7	65	250362	1	1	1	639.392	1915.15	3	1915.16	-0.0101	0	55.32	19	27	7.5e-05	K	LPYIYNALIVK	S	Deamidated (NQ)	0.00000100000.0	File828 Spectrum42869 scans: 22543	835771	584501	483949	674400	439123	386599	485746	543978
7	Pavir.Aa02225.1	Pavir.Aa02225.1	13644	18424	546	546	7	7	65	143172	1	1	1	779.896	1557.78	2	1557.78	-0.0021	0	44.99		26	0.00069	R	AVAMSATDGLMR	G	2 Oxidation (M)	0.000300000030.0	File837 Spectrum242437 scans: 6228	778959	684441	462779	569477	549177	543196	348981	412692
7	Pavir.Aa02225.1	Pavir.Aa02225.1	13644	18424	546	546	7	7	65	132057	1	1	1	763.903	1525.79	2	1525.79	0.0008	0	55.47	18	27	8.4e-05	R	AVAMSATDGLMR	G			File843 Spectrum385587 scans: 13255	764136	711701	683236	570368	721093	700038	555797	554068
7	Pavir.Aa02225.1	Pavir.Aa02225.1	13644	18424	546	546	7	7	65	250118	1	1	1	639.066	1914.17	3	1914.18	-0.0055	0	37.19	15	25	0.0034	K	LPYIYNALIVK	S			File834 Spectrum190326 scans: 26953	728650	586399	393858	431274	276501	250778	307389	624251
7	Pavir.Aa02225.1	Pavir.Aa02225.1	13644	18424	546	546	7	7	65	143170	1	1	1	779.896	1557.78	2	1557.78	-0.0021	0	29.17		26	0.026	R	AVAMSATDGLMR	G	2 Oxidation (M)	0.000300000030.0	File836 Spectrum221437 scans: 7386	703596	518671	448708	534314	535671	480350	332132	373676
7	Pavir.Aa02225.1	Pavir.Aa02225.1	13644	18424	546	546	7	7	65	414072	1	1	1	1009.55	3025.62	3	3025.62	0.0006	0	85.24	21	31	2.1e-07	R	IFNVLGEPIDNLGPVDTSATFPIHR	S			File834 Spectrum192126 scans: 28873	639999	506980	373772	463469	366144	203074	235180	306408
7	Pavir.Aa02225.1	Pavir.Aa02225.1	13644	18424	546	546	7	7	65	132036	1	1	1	763.902	1525.79	2	1525.79	-0.0006	0	47.25		27	0.00057	R	AVAMSATDGLMR	G			File844 Spectrum409140 scans: 13388	620465	603917	581395	377641	514789	514431	388862	395426
7	Pavir.Aa02225.1	Pavir.Aa02225.1	13644	18424	546	546	7	7	65	220180	1	1	1	900.52	1799.03	2	1799.03	-0.003	0	49.35	18	30	0.00058	R	SAPAFIELDTK	L			File837 Spectrum250348 scans: 14666	595108	527995	534113	500440	494605	521467	389553	416504
7	Pavir.Aa02225.1	Pavir.Aa02225.1	13644	18424	546	546	7	7	65	143198	1	1	1	779.896	1557.78	2	1557.78	-0.0015	0	47.56		26	0.00037	R	AVAMSATDGLMR	G	2 Oxidation (M)	0.000300000030.0	File837 Spectrum242526 scans: 6323	594495	545362	472640	427646	427806	452137	325608	403947
7	Pavir.Aa02225.1	Pavir.Aa02225.1	13644	18424	546	546	7	7	65	137602	1	1	1	514.935	1541.78	3	1541.78	-0.0015	0	60.03	18	26	2.3e-05	R	AVAMSATDGLMR	G	Oxidation (M)	0.000000000030.0	File840 Spectrum311663 scans: 9020	584356	634420	473998	276465	295022	639903	664570	715961
7	Pavir.Aa02225.1	Pavir.Aa02225.1	13644	18424	546	546	7	7	65	250141	1	1	1	639.066	1914.18	3	1914.18	-0.0044	0	34.21		25	0.0067	K	LPYIYNALIVK	S			File835 Spectrum215459 scans: 26390	558810	411131	287970	324625	234320	175735	196431	390830
7	Pavir.Aa02225.1	Pavir.Aa02225.1	13644	18424	546	546	7	7	65	220149	1	1	1	600.682	1799.02	3	1799.03	-0.0052	0	41.06	19	30	0.0041	R	SAPAFIELDTK	L			File840 Spectrum317439 scans: 15181	544014	428855	413246	458404	473558	584102	311486	434442
7	Pavir.Aa02225.1	Pavir.Aa02225.1	13644	18424	546	546	7	7	65	137557	1	1	1	771.898	1541.78	2	1541.78	-0.003	0	32.62		26	0.013	R	AVAMSATDGLMR	G	Oxidation (M)	0.000000000030.0	File837 Spectrum245003 scans: 8965	535634	544356	419026	451890	409194	379637	273982	392848
7	Pavir.Aa02225.1	Pavir.Aa02225.1	13644	18424	546	546	7	7	65	137587	1	1	1	771.899	1541.78	2	1541.78	-0.0019	0	52.21		26	0.00014	R	AVAMSATDGLMR	G	Oxidation (M)	0.000300000000.0	File843 Spectrum382526 scans: 9990	533051	504888	479884	457711	576495	445110	351585	329391
7	Pavir.Aa02225.1	Pavir.Aa02225.1	13644	18424	546	546	7	7	65	414059	1	1	1	1009.55	3025.62	3	3025.62	-0.0006	0	76.4	18	31	1.6e-06	R	IFNVLGEPIDNLGPVDTSATFPIHR	S			File834 Spectrum192096 scans: 28841	513713	321207	294404	413634	273847	347051	248563	171871
7	Pavir.Aa02225.1	Pavir.Aa02225.1	13644	18424	546	546	7	7	65	250392	1	1	1	639.394	1915.16	3	1915.16	-0.0055	0	27.46	23	25	0.035	K	LPYIYNALIVK	S	Deamidated (NQ)	0.00000100000.0	File829 Spectrum67719 scans: 22948	512110	262141	221077	303072	229354	283556	197316	415158
7	Pavir.Aa02225.1	Pavir.Aa02225.1	13644	18424	546	546	7	7	65	137616	1	1	1	771.899	1541.78	2	1541.78	-0.0006	0	49.39		26	0.00028	R	AVAMSATDGLMR	G	Oxidation (M)	0.000300000000.0	File843 Spectrum382707 scans: 10183	486752	532918	525351	473486	570106	481026	337941	331185
7	Pavir.Aa02225.1	Pavir.Aa02225.1	13644	18424	546	546	7	7	65	137586	1	1	1	771.899	1541.78	2	1541.78	-0.0019	0	46.88		26	0.00049	R	AVAMSATDGLMR	G	Oxidation (M)	0.000300000000.0	File843 Spectrum382617 scans: 10087	465695	509045	433665	388882	485515	467606	328686	301475
7	Pavir.Aa02225.1	Pavir.Aa02225.1	13644	18424	546	546	7	7	65	250121	1	1	1	958.095	1914.17	2	1914.18	-0.0054	0	31.73		25	0.012	K	LPYIYNALIVK	S			File834 Spectrum189923 scans: 26523	405929	430608	253929	355629	239996	206690	246461	322889
7	Pavir.Aa02225.1	Pavir.Aa02225.1	13644	18424	546	546	7	7	65	137573	1	1	1	771.899	1541.78	2	1541.78	-0.0024	0	35.15		26	0.0073	R	AVAMSATDGLMR	G	Oxidation (M)	0.000000000030.0	File843 Spectrum382271 scans: 9718	401918	352828	388168	319185	374707	343646	278234	288021
7	Pavir.Aa02225.1	Pavir.Aa02225.1	13644	18424	546	546	7	7	65	250139	1	1	1	958.095	1914.18	2	1914.18	-0.0045	0	37.77		25	0.003	K	LPYIYNALIVK	S			File834 Spectrum190296 scans: 26921	389400	316126	240044	328777	237692	174444	204686	294972
7	Pavir.Aa02225.1	Pavir.Aa02225.1	13644	18424	546	546	7	7	65	143224	1	1	1	779.897	1557.78	2	1557.78	-0.0011	0	31.6		26	0.016	R	AVAMSATDGLMR	G	2 Oxidation (M)	0.000300000030.0	File837 Spectrum242392 scans: 6180	389073	415308	314363	378978	311663	295723	213153	267056
7	Pavir.Aa02225.1	Pavir.Aa02225.1	13644	18424	546	546	7	7	65	132054	1	1	1	763.903	1525.79	2	1525.79	0.0006	0	53.1	19	27	0.00015	R	AVAMSATDGLMR	G			File843 Spectrum385047 scans: 12679	381198	418993	397347	321311	385460	397079	266378	244521
7	Pavir.Aa02225.1	Pavir.Aa02225.1	13644	18424	546	546	7	7	65	220124	1	1	1	600.681	1799.02	3	1799.03	-0.0072	0	44.17	21	29	0.0019	R	SAPAFIELDTK	L			File837 Spectrum250342 scans: 14660	366618	413187	334046	248054	361867	384313	250623	230619
7	Pavir.Aa02225.1	Pavir.Aa02225.1	13644	18424	546	546	7	7	65	250367	1	1	1	639.392	1915.16	3	1915.16	-0.0092	0	40.56	17	26	0.0021	K	LPYIYNALIVK	S	Deamidated (NQ)	0.00000100000.0	File833 Spectrum167004 scans: 27624	346883	295513	254097	280115	220564	172806	158667	281518
7	Pavir.Aa02225.1	Pavir.Aa02225.1	13644	18424	546	546	7	7	65	137576	1	1	1	771.899	1541.78	2	1541.78	-0.0023	0	39.72		26	0.0025	R	AVAMSATDGLMR	G	Oxidation (M)	0.000000000030.0	File840 Spectrum311588 scans: 8940	337929	336048	233263	251727	215628	232283	169746	207635
7	Pavir.Aa02225.1	Pavir.Aa02225.1	13644	18424	546	546	7	7	65	250114	1	1	1	958.095	1914.17	2	1914.18	-0.0057	0	39.98		25	0.0018	K	LPYIYNALIVK	S			File835 Spectrum215192 scans: 26105	288789	267564	195016	231183	162723	131606	148152	226246
7	Pavir.Aa02225.1	Pavir.Aa02225.1	13644	18424	546	546	7	7	65	143231	1	1	1	779.897	1557.78	2	1557.78	-0.001	0	45.61		26	0.00063	R	AVAMSATDGLMR	G	2 Oxidation (M)	0.000300000030.0	File835 Spectrum197684 scans: 7430	260713	249943	131569	165786	163471	166755	94905.7	121083
7	Pavir.Aa02225.1	Pavir.Aa02225.1	13644	18424	546	546	7	7	65	414005	1	1	1	1009.55	3025.61	3	3025.62	-0.0038	0	75.27	18	31	2.1e-06	R	IFNVLGEPIDNLGPVDTSATFPIHR	S			File833 Spectrum167919 scans: 28600	243484	266952	179188	220606	213765	186809	147878	128259
7	Pavir.Aa02225.1	Pavir.Aa02225.1	13644	18424	546	546	7	7	65	132007	1	1	1	763.9	1525.79	2	1525.79	-0.0038	0	44.08	19	27	0.0012	R	AVAMSATDGLMR	G			File842 Spectrum359993 scans: 11117	219755	213641	217715	178431	195413	192097	169229	167498
7	Pavir.Aa02225.1	Pavir.Aa02225.1	13644	18424	546	546	7	7	65	250383	1	1	1	639.393	1915.16	3	1915.16	-0.0072	0	32.27	22	26	0.013	K	LPYIYNALIVK	S	Deamidated (NQ)	0.00000100000.0	File833 Spectrum167094 scans: 27720	205449	189022	136946	157843	123277	110628	95615	171871
7	Pavir.Aa02225.1	Pavir.Aa02225.1	13644	18424	546	546	7	7	65	137549	1	1	1	771.898	1541.78	2	1541.78	-0.0034	0	52.45		26	0.00013	R	AVAMSATDGLMR	G	Oxidation (M)	0.000300000000.0	File837 Spectrum245451 scans: 9443	192283	143231	159333	146146	173680	106731	114970	103750
7	Pavir.Aa02225.1	Pavir.Aa02225.1	13644	18424	546	546	7	7	65	137531	1	1	1	771.897	1541.78	2	1541.78	-0.0046	0	43.16		26	0.001	R	AVAMSATDGLMR	G	Oxidation (M)	0.000000000030.0	File837 Spectrum244734 scans: 8678	185142	231762	152990	163089	161534	167737	109722	133079
7	Pavir.Aa02225.1	Pavir.Aa02225.1	13644	18424	546	546	7	7	65	143209	1	1	1	520.267	1557.78	3	1557.78	-0.0014	0	39.7		26	0.0023	R	AVAMSATDGLMR	G	2 Oxidation (M)	0.000300000030.0	File835 Spectrum197714 scans: 7462	184568	160098	124046	139074	110684	124548	93889.2	103537
7	Pavir.Aa02225.1	Pavir.Aa02225.1	13644	18424	546	546	7	7	65	143180	1	1	1	779.896	1557.78	2	1557.78	-0.0018	0	47.11		26	0.00042	R	AVAMSATDGLMR	G	2 Oxidation (M)	0.000300000030.0	File837 Spectrum242363 scans: 6149	181222	184440	132751	131695	136479	128450	99295.6	93985.2
7	Pavir.Aa02225.1	Pavir.Aa02225.1	13644	18424	546	546	7	7	65	250094	1	1	1	639.065	1914.17	3	1914.18	-0.0066	0	34.31		26	0.0091	K	LPYIYNALIVK	S			File834 Spectrum189876 scans: 26473	176951	132794	126179	94091.8	67614.4	65840.5	83115	132295
7	Pavir.Aa02225.1	Pavir.Aa02225.1	13644	18424	546	546	7	7	65	143267	1	1	1	779.897	1557.78	2	1557.78	0.0003	0	46.67		26	0.00052	R	AVAMSATDGLMR	G	2 Oxidation (M)	0.000300000030.0	File835 Spectrum197775 scans: 7527	176846	174248	111026	135088	108518	110485	65188.3	111150
7	Pavir.Aa02225.1	Pavir.Aa02225.1	13644	18424	546	546	7	7	65	143223	1	1	1	779.897	1557.78	2	1557.78	-0.0011	0	44.26		26	0.00086	R	AVAMSATDGLMR	G	2 Oxidation (M)	0.000300000030.0	File837 Spectrum242602 scans: 6404	176104	141930	120290	128425	155304	98714.9	89531.7	93155.6
7	Pavir.Aa02225.1	Pavir.Aa02225.1	13644	18424	546	546	7	7	65	143208	1	1	1	520.267	1557.78	3	1557.78	-0.0014	0	42.43	18	26	0.0012	R	AVAMSATDGLMR	G	2 Oxidation (M)	0.000300000030.0	File837 Spectrum242391 scans: 6179	169203	146485	102689	165812	108150	95971.8	99741	118505
7	Pavir.Aa02225.1	Pavir.Aa02225.1	13644	18424	546	546	7	7	65	250365	1	1	1	639.392	1915.15	3	1915.16	-0.0097	0	28.51	17	26	0.033	K	LPYIYNALIVK	S	Deamidated (NQ)	0.00000100000.0	File828 Spectrum43034 scans: 22719	154542	103363	76923.2	106803	52859.1	77664.7	84516.6	93581.6
7	Pavir.Aa02225.1	Pavir.Aa02225.1	13644	18424	546	546	7	7	65	220139	1	1	1	600.682	1799.02	3	1799.03	-0.0061	0	44.09	20	30	0.0021	R	SAPAFIELDTK	L			File841 Spectrum341437 scans: 15855	147388	107633	118460	75757.1	122134	110342	101363	117159
7	Pavir.Aa02225.1	Pavir.Aa02225.1	13644	18424	546	546	7	7	65	413982	1	1	1	1009.54	3025.61	3	3025.62	-0.0052	0	80.62	18	31	6.2e-07	R	IFNVLGEPIDNLGPVDTSATFPIHR	S			File833 Spectrum167964 scans: 28648	143859	105735	101215	100713	106736	67234.8	85067.6	122989
7	Pavir.Aa02225.1	Pavir.Aa02225.1	13644	18424	546	546	7	7	65	250162	1	1	1	958.096	1914.18	2	1914.18	-0.0026	0	41.56		25	0.0012	K	LPYIYNALIVK	S			File834 Spectrum190390 scans: 27021	143351	108042	93775.7	104061	89210.9	72620.2	78895.4	107439
7	Pavir.Aa02225.1	Pavir.Aa02225.1	13644	18424	546	546	7	7	65	250385	1	1	1	639.393	1915.16	3	1915.16	-0.007	0	27.98	24	26	0.036	K	LPYIYNALIVK	S	Deamidated (NQ)	0.00000100000.0	File829 Spectrum67809 scans: 23044	138053	83005.6	60482.7	86809.2	56531	77439.6	56846.7	81428.5
7	Pavir.Aa02225.1	Pavir.Aa02225.1	13644	18424	546	546	7	7	65	137539	1	1	1	771.898	1541.78	2	1541.78	-0.0038	0	50.21		26	0.00021	R	AVAMSATDGLMR	G	Oxidation (M)	0.000000000030.0	File843 Spectrum382347 scans: 9799	135606	117616	128846	108733	139499	120533	92699.5	99815.2
7	Pavir.Aa02225.1	Pavir.Aa02225.1	13644	18424	546	546	7	7	65	137593	1	1	1	771.899	1541.78	2	1541.78	-0.0018	0	47.75		26	0.00039	R	AVAMSATDGLMR	G	Oxidation (M)	0.000300000000.0	File840 Spectrum311906 scans: 9279	130922	117057	103283	108599	123460	79206.1	81959.3	61382.5
7	Pavir.Aa02225.1	Pavir.Aa02225.1	13644	18424	546	546	7	7	65	414019	1	1	1	1009.55	3025.62	3	3025.62	-0.0029	0	92.32	22	31	4.2e-08	R	IFNVLGEPIDNLGPVDTSATFPIHR	S			File833 Spectrum167739 scans: 28408	127392	165390	67475.7	115033	88098.8	58203.5	68261.2	96676
7	Pavir.Aa02225.1	Pavir.Aa02225.1	13644	18424	546	546	7	7	65	220171	1	1	1	900.52	1799.03	2	1799.03	-0.0039	0	57.38	21	30	9.8e-05	R	SAPAFIELDTK	L			File837 Spectrum250781 scans: 15128	118926	88988	88614.8	85619.3	112797	91022.7	76531.7	83951
7	Pavir.Aa02225.1	Pavir.Aa02225.1	13644	18424	546	546	7	7	65	132043	1	1	1	763.902	1525.79	2	1525.79	-0.0001	0	47.41	20	27	0.00055	R	AVAMSATDGLMR	G			File843 Spectrum384493 scans: 12088	118624	111478	107505	87622.3	104042	85393.9	70646.5	78849.8
7	Pavir.Aa02225.1	Pavir.Aa02225.1	13644	18424	546	546	7	7	65	137623	1	1	1	771.9	1541.79	2	1541.78	0.0002	0	48.5	16	27	0.00036	R	AVAMSATDGLMR	G	Oxidation (M)	0.000300000000.0	File843 Spectrum382796 scans: 10278	118474	122388	123326	113485	139637	113863	80370	103560
7	Pavir.Aa02225.1	Pavir.Aa02225.1	13644	18424	546	546	7	7	65	413959	1	1	1	757.41	3025.61	4	3025.62	-0.0082	0	39.31		31	0.0082	R	IFNVLGEPIDNLGPVDTSATFPIHR	S			File832 Spectrum139108 scans: 23088	113100	110634	84669.9	72325.6	104789	71479.2	54384.6	73434.7
7	Pavir.Aa02225.1	Pavir.Aa02225.1	13644	18424	546	546	7	7	65	143273	1	1	1	779.898	1557.78	2	1557.78	0.0007	0	31.67		26	0.017	R	AVAMSATDGLMR	G	2 Oxidation (M)	0.000300000030.0	File836 Spectrum220995 scans: 6914	108496	113031	55728.9	66228.7	60308	68692.2	35176.9	54397.8
7	Pavir.Aa02225.1	Pavir.Aa02225.1	13644	18424	546	546	7	7	65	250398	1	1	1	958.587	1915.16	2	1915.16	-0.0049	0	30.15	17	25	0.019	K	LPYIYNALIVK	S	Deamidated (NQ)	0.00000100000.0	File833 Spectrum167036 scans: 27658	108266	77967.3	57972.7	77153	54033.7	43109.3	53735.1	68636.2
7	Pavir.Aa02225.1	Pavir.Aa02225.1	13644	18424	546	546	7	7	65	250412	1	1	1	958.588	1915.16	2	1915.16	-0.0026	0	29	19	25	0.024	K	LPYIYNALIVK	S	Deamidated (NQ)	0.00000100000.0	File833 Spectrum166974 scans: 27592	106298	84783.8	68253.6	82695.1	57387.3	52206.3	52133.1	84029.5
7	Pavir.Aa02225.1	Pavir.Aa02225.1	13644	18424	546	546	7	7	65	250401	1	1	1	958.587	1915.16	2	1915.16	-0.0048	0	34.23	18	25	0.0074	K	LPYIYNALIVK	S	Deamidated (NQ)	0.00000100000.0	File833 Spectrum167066 scans: 27690	106187	86660.3	63759	72556.7	48875.3	45320.9	45833.1	72593.9
7	Pavir.Aa02225.1	Pavir.Aa02225.1	13644	18424	546	546	7	7	65	414057	1	1	1	1009.55	3025.62	3	3025.62	-0.0008	0	103.91	23	31	2.8e-09	R	IFNVLGEPIDNLGPVDTSATFPIHR	S			File834 Spectrum192006 scans: 28745	104895	129245	79369.9	90354.2	62377.6	62536.3	59765.3	59442.9
7	Pavir.Aa02225.1	Pavir.Aa02225.1	13644	18424	546	546	7	7	65	412898	1	1	1	1005.19	3012.56	3	3012.56	-0.0007	1	73.76		31	3.3e-06	R	DTADKQINVTCEVQQLLGNNR	V	Methylthio (C)	0.000000000020000000000.0	File846 Spectrum465258 scans: 22321	104216	22737.7	129646	57192.2	222924	265117	101852	20763.5
7	Pavir.Aa02225.1	Pavir.Aa02225.1	13644	18424	546	546	7	7	65	250414	1	1	1	639.395	1915.16	3	1915.16	-0.0024	0	40.92	22	25	0.0015	K	LPYIYNALIVK	S	Deamidated (NQ)	0.00000100000.0	File830 Spectrum92777 scans: 23655	103697	76042.9	71116.9	69590.4	56142.5	47845.2	41059.5	88671
7	Pavir.Aa02225.1	Pavir.Aa02225.1	13644	18424	546	546	7	7	65	132030	1	1	1	509.603	1525.79	3	1525.79	-0.0013	0	61.08	27	27	2.1e-05	R	AVAMSATDGLMR	G			File844 Spectrum409170 scans: 13420	103102	102758	52767.1	70507.9	107721	64547.1	79548.3	40305
7	Pavir.Aa02225.1	Pavir.Aa02225.1	13644	18424	546	546	7	7	65	250135	1	1	1	958.095	1914.18	2	1914.18	-0.0047	0	25.44		25	0.05	K	LPYIYNALIVK	S			File834 Spectrum189872 scans: 26468	102520	95059.8	71958.8	81237.1	67814.9	51936.2	59026.9	78603.2
7	Pavir.Aa02225.1	Pavir.Aa02225.1	13644	18424	546	546	7	7	65	250124	1	1	1	639.066	1914.17	3	1914.18	-0.0053	0	35.89		25	0.0045	K	LPYIYNALIVK	S			File834 Spectrum190448 scans: 27083	99948.2	94523.8	64598.7	71560.5	63494.9	48978.2	55501.3	102259
7	Pavir.Aa02225.1	Pavir.Aa02225.1	13644	18424	546	546	7	7	65	143200	1	1	1	779.896	1557.78	2	1557.78	-0.0015	0	37.29		26	0.0039	R	AVAMSATDGLMR	G	2 Oxidation (M)	0.000300000030.0	File840 Spectrum309310 scans: 6510	98550.1	95629.1	74508.7	64663	77981.3	71443.8	61961	70474.9
7	Pavir.Aa02225.1	Pavir.Aa02225.1	13644	18424	546	546	7	7	65	250395	1	1	1	639.394	1915.16	3	1915.16	-0.0051	0	38.44	16	25	0.0028	K	LPYIYNALIVK	S	Deamidated (NQ)	0.00000100000.0	File830 Spectrum92657 scans: 23527	97090.5	72708.2	67701.7	78206.4	48717.1	39225.8	44976.6	78367.7
7	Pavir.Aa02225.1	Pavir.Aa02225.1	13644	18424	546	546	7	7	65	132022	1	1	1	763.901	1525.79	2	1525.79	-0.0021	0	47.25		27	0.00053	R	AVAMSATDGLMR	G			File844 Spectrum409232 scans: 13486	95610.1	98937.3	76453.6	73166.1	87769.5	72585.6	64727.5	53287.8
7	Pavir.Aa02225.1	Pavir.Aa02225.1	13644	18424	546	546	7	7	65	250382	1	1	1	639.393	1915.16	3	1915.16	-0.0074	0	41.11	16	26	0.0018	K	LPYIYNALIVK	S	Deamidated (NQ)	0.00000100000.0	File833 Spectrum167169 scans: 27800	92799.8	72607.9	51701	79572	42021	37907.6	43427.1	69353.8
7	Pavir.Aa02225.1	Pavir.Aa02225.1	13644	18424	546	546	7	7	65	143195	1	1	1	779.896	1557.78	2	1557.78	-0.0016	0	43.63		26	0.00093	R	AVAMSATDGLMR	G	2 Oxidation (M)	0.000300000030.0	File840 Spectrum309235 scans: 6430	91847	79314	68198.5	66840.7	68527.8	56928.3	41708.8	75486.4
7	Pavir.Aa02225.1	Pavir.Aa02225.1	13644	18424	546	546	7	7	65	143229	1	1	1	520.267	1557.78	3	1557.78	-0.001	0	32.14	26	26	0.014	R	AVAMSATDGLMR	G	2 Oxidation (M)	0.000300000030.0	File835 Spectrum197805 scans: 7559	90884.7	113615	49771.3	83771.2	75970.9	90774	44499.7	75968.5
7	Pavir.Aa02225.1	Pavir.Aa02225.1	13644	18424	546	546	7	7	65	137548	1	1	1	771.898	1541.78	2	1541.78	-0.0035	0	33.27		26	0.011	R	AVAMSATDGLMR	G	Oxidation (M)	0.000000000030.0	File840 Spectrum311571 scans: 8921	86496.8	95293.2	66372	64782.4	68305.6	69853.8	48384	60104.4
7	Pavir.Aa02225.1	Pavir.Aa02225.1	13644	18424	546	546	7	7	65	132034	1	1	1	763.902	1525.79	2	1525.79	-0.0007	0	53.96	20	27	0.00012	R	AVAMSATDGLMR	G			File843 Spectrum384537 scans: 12135	86122.3	71571.1	71107.3	52834.3	64996.7	73241	47538.6	56393.4
7	Pavir.Aa02225.1	Pavir.Aa02225.1	13644	18424	546	546	7	7	65	412992	1	1	1	1005.52	3013.55	3	3013.54	0.0048	1	74.98		31	2.4e-06	R	DTADKQINVTCEVQQLLGNNR	V	Deamidated (NQ); Methylthio (C)	0.000000000020000000100.0	File843 Spectrum394168 scans: 22408	85823.5	22835.1	77260.3	34145.2	118989	149064	65822.5	19373.3
7	Pavir.Aa02225.1	Pavir.Aa02225.1	13644	18424	546	546	7	7	65	250108	1	1	1	639.065	1914.17	3	1914.18	-0.0059	0	39.85	16	26	0.0025	K	LPYIYNALIVK	S			File835 Spectrum215099 scans: 26006	85433.6	92361.4	62779.6	76523.1	33079.4	30419.1	55694.8	68243.8
7	Pavir.Aa02225.1	Pavir.Aa02225.1	13644	18424	546	546	7	7	65	220144	1	1	1	450.763	1799.02	4	1799.03	-0.0059	0	33.02		30	0.026	R	SAPAFIELDTK	L			File837 Spectrum250611 scans: 14947	82481.8	54685.3	40375.6	70641.1	55112.1	58474.8	58975.9	50832.5
7	Pavir.Aa02225.1	Pavir.Aa02225.1	13644	18424	546	546	7	7	65	250095	1	1	1	639.065	1914.17	3	1914.18	-0.0066	0	34.25		26	0.0092	K	LPYIYNALIVK	S			File836 Spectrum239082 scans: 26220	82098.3	69338.5	49636.5	53817.5	42703.2	33017.1	39660.3	48096.9
7	Pavir.Aa02225.1	Pavir.Aa02225.1	13644	18424	546	546	7	7	65	250400	1	1	1	958.587	1915.16	2	1915.16	-0.0049	0	61.91	20	25	1.2e-05	K	LPYIYNALIVK	S	Deamidated (NQ)	0.00000100000.0	File834 Spectrum186124 scans: 22470	81017.8	80798.2	61367.8	73431.6	51361.9	38414	46521.2	66629.4
7	Pavir.Aa02225.1	Pavir.Aa02225.1	13644	18424	546	546	7	7	65	220155	1	1	1	900.519	1799.02	2	1799.03	-0.0046	0	53.03	21	30	0.00027	R	SAPAFIELDTK	L			File840 Spectrum317949 scans: 15725	77926	55318.5	53772	54947.1	75859.2	60024.3	45161.8	49621.7
7	Pavir.Aa02225.1	Pavir.Aa02225.1	13644	18424	546	546	7	7	65	143284	1	1	1	779.898	1557.78	2	1557.78	0.0026	0	43.38		26	0.001	R	AVAMSATDGLMR	G	2 Oxidation (M)	0.000300000030.0	File843 Spectrum379589 scans: 6857	77670.2	70086.2	66885.3	53518.7	73285.8	59325.1	50450.2	56505.5
7	Pavir.Aa02225.1	Pavir.Aa02225.1	13644	18424	546	546	7	7	65	143269	1	1	1	779.897	1557.78	2	1557.78	0.0004	0	37.9		26	0.0039	R	AVAMSATDGLMR	G	2 Oxidation (M)	0.000300000030.0	File838 Spectrum263735 scans: 5174	75578.3	66555.7	65389.4	58983.4	66404.5	52068.1	45368.7	47783
7	Pavir.Aa02225.1	Pavir.Aa02225.1	13644	18424	546	546	7	7	65	220146	1	1	1	900.519	1799.02	2	1799.03	-0.0055	0	41.24	20	30	0.0039	R	SAPAFIELDTK	L			File841 Spectrum341444 scans: 15862	73740.6	55837.6	78703.8	65875.8	79306.1	65887.7	45103.6	45103.5
7	Pavir.Aa02225.1	Pavir.Aa02225.1	13644	18424	546	546	7	7	65	250363	1	1	1	958.584	1915.15	2	1915.16	-0.0101	0	40.22	15	27	0.0024	K	LPYIYNALIVK	S	Deamidated (NQ)	0.00000100000.0	File829 Spectrum67651 scans: 22875	69032.4	67164.3	47018.6	55936.1	39660.7	34214	37716.1	55675.9
7	Pavir.Aa02225.1	Pavir.Aa02225.1	13644	18424	546	546	7	7	65	250154	1	1	1	958.096	1914.18	2	1914.18	-0.0035	0	35.64	18	25	0.0048	K	LPYIYNALIVK	S			File835 Spectrum215475 scans: 26407	68705.6	70997.9	52014.5	61101	44435.3	38162	36972.8	58972
7	Pavir.Aa02225.1	Pavir.Aa02225.1	13644	18424	546	546	7	7	65	137610	1	1	1	771.899	1541.78	2	1541.78	-0.001	0	45.81		26	0.00063	R	AVAMSATDGLMR	G	Oxidation (M)	0.000300000000.0	File843 Spectrum382437 scans: 9895	67399.9	66424.8	65164.3	55939.5	66393.4	56070	41631.9	55193.8
7	Pavir.Aa02225.1	Pavir.Aa02225.1	13644	18424	546	546	7	7	65	137575	1	1	1	771.899	1541.78	2	1541.78	-0.0023	0	39.74		26	0.0025	R	AVAMSATDGLMR	G	Oxidation (M)	0.000000000030.0	File840 Spectrum311771 scans: 9135	65538.4	64250.6	50732.7	45691.7	48682.5	53053.5	32376.7	51359.5
7	Pavir.Aa02225.1	Pavir.Aa02225.1	13644	18424	546	546	7	7	65	220140	1	1	1	900.519	1799.02	2	1799.03	-0.0061	0	49.38	21	30	0.00061	R	SAPAFIELDTK	L			File837 Spectrum250811 scans: 15160	62042.1	39992.5	45359.1	42824	47924.5	43395.4	37613.9	36605.2
7	Pavir.Aa02225.1	Pavir.Aa02225.1	13644	18424	546	546	7	7	65	220125	1	1	1	900.518	1799.02	2	1799.03	-0.0071	0	46.08	18	29	0.0012	R	SAPAFIELDTK	L			File837 Spectrum249659 scans: 13931	61445.3	214869	123201	91604.3	194921	70695.2	54952.6	236449
7	Pavir.Aa02225.1	Pavir.Aa02225.1	13644	18424	546	546	7	7	65	137614	1	1	1	771.899	1541.78	2	1541.78	-0.0009	0	48.26		26	0.00037	R	AVAMSATDGLMR	G	Oxidation (M)	0.000300000000.0	File839 Spectrum289235 scans: 8994	60560.5	50281.6	49583.8	44849.1	49005	45787.8	27176.1	32625.2
7	Pavir.Aa02225.1	Pavir.Aa02225.1	13644	18424	546	546	7	7	65	220133	1	1	1	900.519	1799.02	2	1799.03	-0.0063	0	59.62	21	30	5.8e-05	R	SAPAFIELDTK	L			File841 Spectrum341415 scans: 15831	59206.7	55077.9	66905.2	62379.3	56892.8	61147.6	41915.2	40327.4
7	Pavir.Aa02225.1	Pavir.Aa02225.1	13644	18424	546	546	7	7	65	250402	1	1	1	958.587	1915.16	2	1915.16	-0.0047	0	46.19	16	25	0.00047	K	LPYIYNALIVK	S	Deamidated (NQ)	0.00000100000.0	File830 Spectrum92734 scans: 23609	58780.5	49003.2	41411.5	43956.9	27858.9	28537.9	25983.6	42166.1
7	Pavir.Aa02225.1	Pavir.Aa02225.1	13644	18424	546	546	7	7	65	250407	1	1	1	958.588	1915.16	2	1915.16	-0.0037	0	40.59	16	25	0.0016	K	LPYIYNALIVK	S	Deamidated (NQ)	0.00000100000.0	File830 Spectrum92690 scans: 23562	58159.9	47485	34992.6	44900.1	31994.5	27430.8	26025.5	43735.7
7	Pavir.Aa02225.1	Pavir.Aa02225.1	13644	18424	546	546	7	7	65	250092	1	1	1	639.065	1914.17	3	1914.18	-0.0072	0	37.06	15	26	0.0048	K	LPYIYNALIVK	S			File836 Spectrum239143 scans: 26285	57945.4	41887.1	33608.2	50185.6	32153.9	26840.3	29967.5	39766.9
7	Pavir.Aa02225.1	Pavir.Aa02225.1	13644	18424	546	546	7	7	65	220166	1	1	1	600.682	1799.02	3	1799.03	-0.0041	0	36.66	19	30	0.012	R	SAPAFIELDTK	L			File840 Spectrum317993 scans: 15772	57264.1	29153.6	30356.3	30582.4	53600	38027.5	29856.5	30091.4
7	Pavir.Aa02225.1	Pavir.Aa02225.1	13644	18424	546	546	7	7	65	137567	1	1	1	771.898	1541.78	2	1541.78	-0.0027	0	42.24		26	0.0014	R	AVAMSATDGLMR	G	Oxidation (M)	0.000000000030.0	File839 Spectrum287948 scans: 7621	56354.1	51915.6	39022.9	36680.2	33571.4	39346.5	25703.2	38780.3
7	Pavir.Aa02225.1	Pavir.Aa02225.1	13644	18424	546	546	7	7	65	250380	1	1	1	958.586	1915.16	2	1915.16	-0.0074	0	40.53	16	26	0.002	K	LPYIYNALIVK	S	Deamidated (NQ)	0.00000100000.0	File828 Spectrum43055 scans: 22741	56352.9	44037	36991	38740.4	26680.3	21960.8	23716.7	42704.3
7	Pavir.Aa02225.1	Pavir.Aa02225.1	13644	18424	546	546	7	7	65	137555	1	1	1	514.934	1541.78	3	1541.78	-0.0031	0	50.24		26	0.00022	R	AVAMSATDGLMR	G	Oxidation (M)	0.000000000030.0	File837 Spectrum245001 scans: 8963	56277.6	163461	93604.4	79985.6	119679	114131	77079.1	100006
7	Pavir.Aa02225.1	Pavir.Aa02225.1	13644	18424	546	546	7	7	65	132066	1	1	1	763.903	1525.79	2	1525.79	0.0024	0	39.15	18	27	0.0036	R	AVAMSATDGLMR	G			File843 Spectrum385676 scans: 13350	55672.3	51844.6	58778.9	49870.2	63086.3	51522.4	41541.4	41033.8
7	Pavir.Aa02225.1	Pavir.Aa02225.1	13644	18424	546	546	7	7	65	414169	1	1	1	1009.87	3026.59	3	3026.6	-0.0168	0	91.56		31	5e-08	R	IFNVLGEPIDNLGPVDTSATFPIHR	S	Deamidated (NQ)	0.0000000000100000000000000.0	File832 Spectrum143471 scans: 27742	55485.2	53889.2	52836.4	51960.1	55398.1	53609.3	45299.3	51807.9
7	Pavir.Aa02225.1	Pavir.Aa02225.1	13644	18424	546	546	7	7	65	250399	1	1	1	958.587	1915.16	2	1915.16	-0.0049	0	27.55	18	25	0.034	K	LPYIYNALIVK	S	Deamidated (NQ)	0.00000100000.0	File833 Spectrum167096 scans: 27722	55304.5	47090.5	39056.7	40637.2	30004.1	24953.9	28262.6	42289.4
7	Pavir.Aa02225.1	Pavir.Aa02225.1	13644	18424	546	546	7	7	65	132015	1	1	1	763.901	1525.79	2	1525.79	-0.0028	0	39.9	19	27	0.0029	R	AVAMSATDGLMR	G			File842 Spectrum360765 scans: 11940	53696.9	52725.9	60411.1	48493.9	51149.1	51288	37777.1	42950.9
7	Pavir.Aa02225.1	Pavir.Aa02225.1	13644	18424	546	546	7	7	65	412988	1	1	1	1005.52	3013.54	3	3013.54	0.0019	1	75.33		31	2.2e-06	R	DTADKQINVTCEVQQLLGNNR	V	Deamidated (NQ); Methylthio (C)	0.000000000020000000100.0	File843 Spectrum394141 scans: 22379	53316.4	15620.5	59628.8	30200.2	89557	107710	39581.3	12478.3
7	Pavir.Aa02225.1	Pavir.Aa02225.1	13644	18424	546	546	7	7	65	137589	1	1	1	771.899	1541.78	2	1541.78	-0.0019	0	37.25		26	0.0045	R	AVAMSATDGLMR	G	Oxidation (M)	0.000000000030.0	File843 Spectrum382097 scans: 9532	52478.4	61684.6	56997.8	43767.1	54054.6	53999.8	38789.9	40260.2
7	Pavir.Aa02225.1	Pavir.Aa02225.1	13644	18424	546	546	7	7	65	143252	1	1	1	779.897	1557.78	2	1557.78	-0.0005	0	41.89		26	0.0015	R	AVAMSATDGLMR	G	2 Oxidation (M)	0.000300000030.0	File838 Spectrum263692 scans: 5128	52156.8	53117.7	42280	45766.6	49276.6	36943.6	34560.9	35136.6
7	Pavir.Aa02225.1	Pavir.Aa02225.1	13644	18424	546	546	7	7	65	137605	1	1	1	771.899	1541.78	2	1541.78	-0.0012	0	44.25		26	0.00088	R	AVAMSATDGLMR	G	Oxidation (M)	0.000300000000.0	File840 Spectrum311816 scans: 9183	51737.3	63842.6	38761.7	40978.5	42598.4	36528.8	26867.6	35035.7
7	Pavir.Aa02225.1	Pavir.Aa02225.1	13644	18424	546	546	7	7	65	132012	1	1	1	763.901	1525.79	2	1525.79	-0.0031	0	54.26	23	27	0.00011	R	AVAMSATDGLMR	G			File842 Spectrum359916 scans: 11034	51532.8	56676.1	47161.3	41651	43735.1	41848	33814.5	34340.5
7	Pavir.Aa02225.1	Pavir.Aa02225.1	13644	18424	546	546	7	7	65	220106	1	1	1	600.678	1799.01	3	1799.03	-0.0156	0	38.35	17	30	0.0075	R	SAPAFIELDTK	L			File841 Spectrum341378 scans: 15792	51216.8	44405.6	46632.3	45541.4	54406.4	54724.3	37167.8	50406.5
7	Pavir.Aa02225.1	Pavir.Aa02225.1	13644	18424	546	546	7	7	65	414036	1	1	1	1009.55	3025.62	3	3025.62	-0.0019	0	104.47	23	31	2.5e-09	R	IFNVLGEPIDNLGPVDTSATFPIHR	S			File834 Spectrum192351 scans: 29113	50997.8	58040.2	52270.2	53726.7	56032.9	30351.8	53750	44217.8
7	Pavir.Aa02225.1	Pavir.Aa02225.1	13644	18424	546	546	7	7	65	143187	1	1	1	779.896	1557.78	2	1557.78	-0.0017	0	34.98		26	0.0068	R	AVAMSATDGLMR	G	2 Oxidation (M)	0.000300000030.0	File843 Spectrum379661 scans: 6934	50784.3	50724.3	49994.6	41626.5	44063.3	43730.4	39439.8	37984.3
7	Pavir.Aa02225.1	Pavir.Aa02225.1	13644	18424	546	546	7	7	65	132014	1	1	1	763.901	1525.79	2	1525.79	-0.0029	0	49.73	20	27	0.0003	R	AVAMSATDGLMR	G			File845 Spectrum433218 scans: 13785	50698.5	60149	50461.8	41799.5	46944.1	46830.1	43564.2	46291.9
7	Pavir.Aa02225.1	Pavir.Aa02225.1	13644	18424	546	546	7	7	65	137613	1	1	1	771.899	1541.78	2	1541.78	-0.0009	0	50.95		26	0.0002	R	AVAMSATDGLMR	G	Oxidation (M)	0.000000000030.0	File839 Spectrum288036 scans: 7715	50242.8	36407	35178.2	35937.2	28982.3	31070.7	20189.5	35125.3
7	Pavir.Aa02225.1	Pavir.Aa02225.1	13644	18424	546	546	7	7	65	143222	1	1	1	779.897	1557.78	2	1557.78	-0.0011	0	28.59		26	0.032	R	AVAMSATDGLMR	G	2 Oxidation (M)	0.000300000030.0	File836 Spectrum221531 scans: 7486	48989.6	40860.2	33333.7	39985.4	29462.3	33913.3	18181.2	29340.3
7	Pavir.Aa02225.1	Pavir.Aa02225.1	13644	18424	546	546	7	7	65	143202	1	1	1	779.896	1557.78	2	1557.78	-0.0015	0	43.84		26	0.00087	R	AVAMSATDGLMR	G	2 Oxidation (M)	0.000300000030.0	File835 Spectrum197598 scans: 7338	48609.4	46573.8	29721.4	32319.3	28739.3	29645.3	15911	24923
7	Pavir.Aa02225.1	Pavir.Aa02225.1	13644	18424	546	546	7	7	65	137600	1	1	1	771.899	1541.78	2	1541.78	-0.0015	0	46.23		26	0.00056	R	AVAMSATDGLMR	G	Oxidation (M)	0.000300000000.0	File840 Spectrum311998 scans: 9377	48427.9	57978.3	43680	47661	52545.8	38847.2	26912.7	38197.3
7	Pavir.Aa02225.1	Pavir.Aa02225.1	13644	18424	546	546	7	7	65	137622	1	1	1	771.9	1541.79	2	1541.78	0.0002	0	28.3		27	0.037	R	AVAMSATDGLMR	G	Oxidation (M)	0.000000000030.0	File840 Spectrum311788 scans: 9153	47972.3	46321.4	30484.6	30647.1	34577.7	36046.4	23844.6	29766.3
7	Pavir.Aa02225.1	Pavir.Aa02225.1	13644	18424	546	546	7	7	65	132016	1	1	1	763.901	1525.79	2	1525.79	-0.0027	0	54.52	19	27	9.9e-05	R	AVAMSATDGLMR	G			File842 Spectrum360708 scans: 11879	47929.5	55068.4	45541.2	48545.1	41022.3	45009.9	34661	34037.8
7	Pavir.Aa02225.1	Pavir.Aa02225.1	13644	18424	546	546	7	7	65	250381	1	1	1	958.586	1915.16	2	1915.16	-0.0074	0	37.45	17	26	0.0041	K	LPYIYNALIVK	S	Deamidated (NQ)	0.00000100000.0	File828 Spectrum42797 scans: 22466	47652.8	41478.5	31621.5	46021.4	28573.2	22817.5	21946.5	37177
7	Pavir.Aa02225.1	Pavir.Aa02225.1	13644	18424	546	546	7	7	65	250106	1	1	1	639.065	1914.17	3	1914.18	-0.0061	0	34.14		26	0.0094	K	LPYIYNALIVK	S			File836 Spectrum239007 scans: 26140	46626.4	40429	34681.6	35591.9	27626.7	27025.9	24975.5	41157.1
7	Pavir.Aa02225.1	Pavir.Aa02225.1	13644	18424	546	546	7	7	65	220156	1	1	1	900.519	1799.02	2	1799.03	-0.0046	0	47.88	20	30	0.00087	R	SAPAFIELDTK	L			File840 Spectrum317990 scans: 15768	46473.5	36702.5	39376.3	32688.9	43453.5	38665.3	27749.9	30517.5
7	Pavir.Aa02225.1	Pavir.Aa02225.1	13644	18424	546	546	7	7	65	137566	1	1	1	771.898	1541.78	2	1541.78	-0.0027	0	37.77		26	0.0039	R	AVAMSATDGLMR	G	Oxidation (M)	0.000000000030.0	File844 Spectrum405475 scans: 9478	46207.7	47725.2	42235.9	44150.3	40912.1	41211.1	30190.5	32445.8
7	Pavir.Aa02225.1	Pavir.Aa02225.1	13644	18424	546	546	7	7	65	414173	1	1	1	1009.87	3026.59	3	3026.6	-0.0094	0	93.38	19	31	3.4e-08	R	IFNVLGEPIDNLGPVDTSATFPIHR	S	Deamidated (NQ)	0.0010000000000000000000000.0	File828 Spectrum47506 scans: 27489	45968.8	54624.8	38000	37153.9	20555.3	25940.5	33592.6	29351.5
7	Pavir.Aa02225.1	Pavir.Aa02225.1	13644	18424	546	546	7	7	65	220121	1	1	1	600.681	1799.02	3	1799.03	-0.0077	0	40.56	18	29	0.0044	R	SAPAFIELDTK	L			File842 Spectrum363863 scans: 15245	45846.9	30603.5	37776.9	39966.6	33177.7	27810.7	27421.4	36235.3
7	Pavir.Aa02225.1	Pavir.Aa02225.1	13644	18424	546	546	7	7	65	250408	1	1	1	958.588	1915.16	2	1915.16	-0.0036	0	36.31		25	0.0044	K	LPYIYNALIVK	S	Deamidated (NQ)	0.00000100000.0	File830 Spectrum92664 scans: 23534	44804.2	35971.1	28196.3	33350.6	23880.3	21526.3	21540.2	31448
7	Pavir.Aa02225.1	Pavir.Aa02225.1	13644	18424	546	546	7	7	65	143165	1	1	1	520.266	1557.78	3	1557.78	-0.0021	0	38.76	16	26	0.0029	R	AVAMSATDGLMR	G	2 Oxidation (M)	0.000300000030.0	File843 Spectrum379556 scans: 6822	44416.6	19953.1	19400.3	16904.3	22927.8	21043.3	25790.2	21055
7	Pavir.Aa02225.1	Pavir.Aa02225.1	13644	18424	546	546	7	7	65	413986	1	1	1	1009.54	3025.61	3	3025.62	-0.0049	0	46.38		31	0.0016	R	IFNVLGEPIDNLGPVDTSATFPIHR	S			File832 Spectrum138839 scans: 22801	41940.7	37728	35425.8	36685.3	40779.7	35860.5	24697	33253
7	Pavir.Aa02225.1	Pavir.Aa02225.1	13644	18424	546	546	7	7	65	132029	1	1	1	763.902	1525.79	2	1525.79	-0.0014	0	42.76	18	27	0.0014	R	AVAMSATDGLMR	G			File843 Spectrum384411 scans: 12000	41644.4	55084.8	42170.5	36691.9	40395.7	37368.4	31542	31302.3
7	Pavir.Aa02225.1	Pavir.Aa02225.1	13644	18424	546	546	7	7	65	220123	1	1	1	600.681	1799.02	3	1799.03	-0.0072	0	29.77	18	29	0.052	R	SAPAFIELDTK	L			File837 Spectrum249682 scans: 13956	41556.3	138077	68385.9	58148.4	96621.9	53340.2	36197.2	121756
7	Pavir.Aa02225.1	Pavir.Aa02225.1	13644	18424	546	546	7	7	65	143139	1	1	1	520.266	1557.78	3	1557.78	-0.0031	0	44.65	17	26	0.00077	R	AVAMSATDGLMR	G	2 Oxidation (M)	0.000300000030.0	File843 Spectrum379631 scans: 6902	39811	40167.3	41082	13096.4	30794.3	31996.3	13787.2	20931.7
7	Pavir.Aa02225.1	Pavir.Aa02225.1	13644	18424	546	546	7	7	65	143167	1	1	1	520.266	1557.78	3	1557.78	-0.0021	0	40.08	17	26	0.0021	R	AVAMSATDGLMR	G	2 Oxidation (M)	0.000300000030.0	File840 Spectrum309250 scans: 6446	39201.5	52025.7	38175.6	29948.2	27769.4	17321.1	30601.6	37165.8
7	Pavir.Aa02225.1	Pavir.Aa02225.1	13644	18424	546	546	7	7	65	143281	1	1	1	779.898	1557.78	2	1557.78	0.0022	0	34.3	15	26	0.0086	R	AVAMSATDGLMR	G	2 Oxidation (M)	0.000300000030.0	File838 Spectrum265763 scans: 7337	38829	36843.7	24038.6	29972.9	25241.8	23274.9	16185.8	19776.9
7	Pavir.Aa02225.1	Pavir.Aa02225.1	13644	18424	546	546	7	7	65	250151	1	1	1	958.096	1914.18	2	1914.18	-0.0037	0	40.02		25	0.0017	K	LPYIYNALIVK	S			File834 Spectrum190454 scans: 27089	38708.1	31088.1	24240.2	29859.8	21729.1	18460.3	20028.9	26817.7
7	Pavir.Aa02225.1	Pavir.Aa02225.1	13644	18424	546	546	7	7	65	250100	1	1	1	639.065	1914.17	3	1914.18	-0.0064	0	36.74		26	0.0052	K	LPYIYNALIVK	S			File836 Spectrum239187 scans: 26332	38045.9	27956.1	27081	29394.9	21143.1	16257.7	15874.5	31190.1
7	Pavir.Aa02225.1	Pavir.Aa02225.1	13644	18424	546	546	7	7	65	250379	1	1	1	639.393	1915.16	3	1915.16	-0.0075	0	27.23	15	26	0.043	K	LPYIYNALIVK	S	Deamidated (NQ)	0.00000100000.0	File833 Spectrum167199 scans: 27832	36104	25150	20315.4	21725.7	19779.9	11879	18302.8	27187.7
7	Pavir.Aa02225.1	Pavir.Aa02225.1	13644	18424	546	546	7	7	65	414176	1	1	1	1009.87	3026.59	3	3026.6	-0.0081	0	86.24	18	31	1.7e-07	R	IFNVLGEPIDNLGPVDTSATFPIHR	S	Deamidated (NQ)	0.0010000000000000000000000.0	File828 Spectrum47476 scans: 27457	35922.1	28271.7	29014.3	25026.5	22579.3	21376.1	11888.7	21514.7
7	Pavir.Aa02225.1	Pavir.Aa02225.1	13644	18424	546	546	7	7	65	143142	1	1	1	520.266	1557.78	3	1557.78	-0.0029	0	33.08	17	26	0.011	R	AVAMSATDGLMR	G	2 Oxidation (M)	0.000300000030.0	File840 Spectrum309326 scans: 6527	35718.3	52430.2	23722.1	31491.3	45691.5	33633.7	21186	47771.8
7	Pavir.Aa02225.1	Pavir.Aa02225.1	13644	18424	546	546	7	7	65	250375	1	1	1	639.393	1915.16	3	1915.16	-0.0081	0	40.37	17	26	0.0021	K	LPYIYNALIVK	S	Deamidated (NQ)	0.00000100000.0	File828 Spectrum42781 scans: 22449	35403.3	28822.3	22194	26552	16167.3	17450.1	17142	20606.6
7	Pavir.Aa02225.1	Pavir.Aa02225.1	13644	18424	546	546	7	7	65	250164	1	1	1	958.096	1914.18	2	1914.18	-0.0025	0	43.4		25	0.00077	K	LPYIYNALIVK	S			File834 Spectrum190442 scans: 27076	35258.4	28056.8	25738.7	27222.9	21155.3	17838.1	17294.8	30506.2
7	Pavir.Aa02225.1	Pavir.Aa02225.1	13644	18424	546	546	7	7	65	412895	1	1	1	1005.19	3012.56	3	3012.56	-0.002	1	62.81		31	4.1e-05	R	DTADKQINVTCEVQQLLGNNR	V	Methylthio (C)	0.000000000020000000000.0	File846 Spectrum465191 scans: 22249	35232.4	12613.8	49613.4	22869	60932.1	80028.2	28106.8	12982.8
7	Pavir.Aa02225.1	Pavir.Aa02225.1	13644	18424	546	546	7	7	65	132025	1	1	1	763.901	1525.79	2	1525.79	-0.0021	0	54.56	22	27	9.9e-05	R	AVAMSATDGLMR	G			File846 Spectrum457416 scans: 13956	35156.1	38187.6	29509.5	30620.4	34754.4	29392.8	25383	25943.2
7	Pavir.Aa02225.1	Pavir.Aa02225.1	13644	18424	546	546	7	7	65	143196	1	1	1	779.896	1557.78	2	1557.78	-0.0016	0	35.69		26	0.0058	R	AVAMSATDGLMR	G	2 Oxidation (M)	0.000300000030.0	File835 Spectrum196907 scans: 6601	34644.7	35314.4	22868	21072.8	19553.8	16411.3	10745.3	19250
7	Pavir.Aa02225.1	Pavir.Aa02225.1	13644	18424	546	546	7	7	65	137632	1	1	1	771.9	1541.79	2	1541.78	0.001	0	45.4	18	26	0.00072	R	AVAMSATDGLMR	G	Oxidation (M)	0.000300000000.0	File839 Spectrum289197 scans: 8953	33778.9	33697.4	26033.6	25932.3	31034.8	23254.8	19025.9	20371.1
7	Pavir.Aa02225.1	Pavir.Aa02225.1	13644	18424	546	546	7	7	65	132062	1	1	1	763.903	1525.79	2	1525.79	0.0013	0	33.62	16	27	0.013	R	AVAMSATDGLMR	G			File843 Spectrum384394 scans: 11982	33727.9	39844.8	29091.4	30750.3	30299.4	27712	23249.6	26515
7	Pavir.Aa02225.1	Pavir.Aa02225.1	13644	18424	546	546	7	7	65	132053	1	1	1	763.903	1525.79	2	1525.79	0.0005	0	58.77	20	27	4.1e-05	R	AVAMSATDGLMR	G			File844 Spectrum409056 scans: 13298	32888.4	38209.5	34626.2	30897.1	33045.8	29470.9	26591.6	22557.4
7	Pavir.Aa02225.1	Pavir.Aa02225.1	13644	18424	546	546	7	7	65	132060	1	1	1	763.903	1525.79	2	1525.79	0.0012	0	58.87	19	27	3.9e-05	R	AVAMSATDGLMR	G			File843 Spectrum383719 scans: 11262	32468.5	32129	32594.3	26226.1	28416.9	29180.1	24287.6	24923
7	Pavir.Aa02225.1	Pavir.Aa02225.1	13644	18424	546	546	7	7	65	137570	1	1	1	771.898	1541.78	2	1541.78	-0.0025	0	40.3		26	0.0022	R	AVAMSATDGLMR	G	Oxidation (M)	0.000300000000.0	File840 Spectrum312079 scans: 9463	32258.1	26897.6	28561	24197	32166.4	19835.5	18819.1	17848.6
7	Pavir.Aa02225.1	Pavir.Aa02225.1	13644	18424	546	546	7	7	65	220141	1	1	1	900.519	1799.02	2	1799.03	-0.006	0	46.02	21	30	0.0013	R	SAPAFIELDTK	L			File837 Spectrum250848 scans: 15199	31990	29282.4	23158.5	20511.7	28855.5	27090.6	17928.4	19474.2
7	Pavir.Aa02225.1	Pavir.Aa02225.1	13644	18424	546	546	7	7	65	250168	1	1	1	958.097	1914.18	2	1914.18	-0.0014	0	30.43		25	0.015	K	LPYIYNALIVK	S			File835 Spectrum215125 scans: 26033	31683.2	32988.3	22480.1	29398.2	19538.4	18091.7	19779	27086.8
7	Pavir.Aa02225.1	Pavir.Aa02225.1	13644	18424	546	546	7	7	65	143120	1	1	1	779.895	1557.78	2	1557.78	-0.0044	0	45.43		26	0.00057	R	AVAMSATDGLMR	G	2 Oxidation (M)	0.000300000030.0	File837 Spectrum242326 scans: 6109	31545.3	36802.6	23570.9	24879.2	22789.1	20777.4	15940.9	19429.4
7	Pavir.Aa02225.1	Pavir.Aa02225.1	13644	18424	546	546	7	7	65	220129	1	1	1	600.681	1799.02	3	1799.03	-0.0068	0	40.35	19	29	0.0044	R	SAPAFIELDTK	L			File842 Spectrum363909 scans: 15294	30919.6	23693.1	23004.8	23093	27450.1	21157.3	23573.4	32692.5
7	Pavir.Aa02225.1	Pavir.Aa02225.1	13644	18424	546	546	7	7	65	137518	1	1	1	771.896	1541.78	2	1541.78	-0.0068	0	38.56		26	0.0031	R	AVAMSATDGLMR	G	Oxidation (M)	0.000300000000.0	File837 Spectrum245547 scans: 9545	30725	26904.2	26354.2	28833	28557.2	22080.9	20468	88076.8
7	Pavir.Aa02225.1	Pavir.Aa02225.1	13644	18424	546	546	7	7	65	132023	1	1	1	763.901	1525.79	2	1525.79	-0.0021	0	43.49	19	27	0.0013	R	AVAMSATDGLMR	G			File846 Spectrum457406 scans: 13945	29826.6	35145.6	29903.3	25910.2	33394.8	29228.4	21719.9	26201.1
7	Pavir.Aa02225.1	Pavir.Aa02225.1	13644	18424	546	546	7	7	65	137523	1	1	1	514.934	1541.78	3	1541.78	-0.005	0	52.88	18	26	0.00011	R	AVAMSATDGLMR	G	Oxidation (M)	0.000000000030.0	File837 Spectrum244733 scans: 8677	29768.2	44053.3	24275	25093.2	36433.9	29591.9	22246.1	24429.7
7	Pavir.Aa02225.1	Pavir.Aa02225.1	13644	18424	546	546	7	7	65	137562	1	1	1	514.935	1541.78	3	1541.78	-0.0028	0	55.55	21	26	6.5e-05	R	AVAMSATDGLMR	G	Oxidation (M)	0.000000000030.0	File843 Spectrum382378 scans: 9832	28548	21138.6	17118.7	30257.8	18467.2	20358.7	15739.7	19664.8
7	Pavir.Aa02225.1	Pavir.Aa02225.1	13644	18424	546	546	7	7	65	132031	1	1	1	763.902	1525.79	2	1525.79	-0.0012	0	59.13		27	3.3e-05	R	AVAMSATDGLMR	G			File843 Spectrum383629 scans: 11166	28345.3	28993.6	27097.9	24469.3	26428.2	27144.3	21105.3	21357.7
7	Pavir.Aa02225.1	Pavir.Aa02225.1	13644	18424	546	546	7	7	65	137636	1	1	1	771.901	1541.79	2	1541.78	0.0019	0	45.07		26	0.00077	R	AVAMSATDGLMR	G	Oxidation (M)	0.000300000000.0	File843 Spectrum382874 scans: 10361	28127.1	31208.6	34057.1	31403.1	25962.9	26276.6	21198.3	21077.4
7	Pavir.Aa02225.1	Pavir.Aa02225.1	13644	18424	546	546	7	7	65	220159	1	1	1	600.682	1799.02	3	1799.03	-0.0044	0	38.21	19	30	0.0081	R	SAPAFIELDTK	L			File837 Spectrum249851 scans: 14136	28124.8	17824.9	19435	12522.7	16184	16189.7	11774.1	10312.3
7	Pavir.Aa02225.1	Pavir.Aa02225.1	13644	18424	546	546	7	7	65	132020	1	1	1	763.901	1525.79	2	1525.79	-0.0023	0	49.89	20	27	0.00029	R	AVAMSATDGLMR	G			File846 Spectrum457396 scans: 13934	27988.1	33110.4	26167.6	27948.3	32345.2	28868	23221.1	25248.1
7	Pavir.Aa02225.1	Pavir.Aa02225.1	13644	18424	546	546	7	7	65	137604	1	1	1	771.899	1541.78	2	1541.78	-0.0012	0	30.18		26	0.022	R	AVAMSATDGLMR	G	Oxidation (M)	0.000000000030.0	File844 Spectrum405516 scans: 9522	27695.7	25102.1	26068.2	24470	27545.6	28892.4	18767.2	19137.9
7	Pavir.Aa02225.1	Pavir.Aa02225.1	13644	18424	546	546	7	7	65	414069	1	1	1	1009.55	3025.62	3	3025.62	0.0003	0	95.05	22	31	2.2e-08	R	IFNVLGEPIDNLGPVDTSATFPIHR	S			File834 Spectrum192382 scans: 29146	27572.5	27388.9	24216.3	23467.6	29280.3	29027.9	11353	16166.9
7	Pavir.Aa02225.1	Pavir.Aa02225.1	13644	18424	546	546	7	7	65	137588	1	1	1	771.899	1541.78	2	1541.78	-0.0019	0	40.49		26	0.0021	R	AVAMSATDGLMR	G	Oxidation (M)	0.000300000000.0	File837 Spectrum244437 scans: 8361	27217.6	28365.2	22940.6	23388.6	21926.6	22825	13320.9	20572.9
7	Pavir.Aa02225.1	Pavir.Aa02225.1	13644	18424	546	546	7	7	65	250113	1	1	1	639.066	1914.17	3	1914.18	-0.0057	0	47.55		25	0.00031	K	LPYIYNALIVK	S			File836 Spectrum238964 scans: 26094	26956.8	23885	16932	25620.8	17866.9	17427.6	14822.7	21895.9
7	Pavir.Aa02225.1	Pavir.Aa02225.1	13644	18424	546	546	7	7	65	220152	1	1	1	600.682	1799.02	3	1799.03	-0.005	0	38.1	19	30	0.0083	R	SAPAFIELDTK	L			File837 Spectrum249835 scans: 14119	26864.4	17006.8	18489.5	16855.3	19415.6	17526.4	11463.1	10905.3
7	Pavir.Aa02225.1	Pavir.Aa02225.1	13644	18424	546	546	7	7	65	132069	1	1	1	763.904	1525.79	2	1525.79	0.0036	0	51.56	17	28	0.00022	R	AVAMSATDGLMR	G			File843 Spectrum383730 scans: 11274	26443.6	23188.4	23339	22199.6	24908.5	21725.9	16697	21312.9
7	Pavir.Aa02225.1	Pavir.Aa02225.1	13644	18424	546	546	7	7	65	250377	1	1	1	639.393	1915.16	3	1915.16	-0.0075	0	27.79	17	26	0.038	K	LPYIYNALIVK	S	Deamidated (NQ)	0.00000100000.0	File829 Spectrum67632 scans: 22855	26045.7	42661.2	22146.6	25726.9	22005.4	15814.2	21489.7	29026.3
7	Pavir.Aa02225.1	Pavir.Aa02225.1	13644	18424	546	546	7	7	65	137581	1	1	1	771.899	1541.78	2	1541.78	-0.0021	0	43.09		26	0.0012	R	AVAMSATDGLMR	G	Oxidation (M)	0.000300000000.0	File837 Spectrum244526 scans: 8456	25956.3	27118.9	20800.1	21908.2	24253.6	20824.4	16165.1	17422.5
7	Pavir.Aa02225.1	Pavir.Aa02225.1	13644	18424	546	546	7	7	65	220128	1	1	1	600.681	1799.02	3	1799.03	-0.0068	0	40.22	21	29	0.0045	R	SAPAFIELDTK	L			File844 Spectrum411063 scans: 15439	25661.4	29030.1	21259	18887	23718.3	24465	15627.6	11289.9
7	Pavir.Aa02225.1	Pavir.Aa02225.1	13644	18424	546	546	7	7	65	143278	1	1	1	779.898	1557.78	2	1557.78	0.0017	0	42.16		26	0.0014	R	AVAMSATDGLMR	G	2 Oxidation (M)	0.000300000030.0	File838 Spectrum265683 scans: 7251	25104.6	24039.3	14484.2	18565.9	14229.3	14376.7	9714.13	13823.7
7	Pavir.Aa02225.1	Pavir.Aa02225.1	13644	18424	546	546	7	7	65	220147	1	1	1	600.682	1799.02	3	1799.03	-0.0054	0	37.75	19	30	0.0089	R	SAPAFIELDTK	L			File837 Spectrum249822 scans: 14105	24891.2	15448.7	20987.7	19457.5	15278.7	17038.8	12678.9	15796.9
7	Pavir.Aa02225.1	Pavir.Aa02225.1	13644	18424	546	546	7	7	65	143255	1	1	1	779.897	1557.78	2	1557.78	-0.0002	0	27.98	15	26	0.038	R	AVAMSATDGLMR	G	2 Oxidation (M)	0.000300000030.0	File836 Spectrum221581 scans: 7539	24354.5	20285.4	16980.6	18808.5	18736	16302.8	10657.8	16166.9
7	Pavir.Aa02225.1	Pavir.Aa02225.1	13644	18424	546	546	7	7	65	220127	1	1	1	900.518	1799.02	2	1799.03	-0.0068	0	41.52	22	29	0.0034	R	SAPAFIELDTK	L			File837 Spectrum249694 scans: 13968	24328.6	64767.5	37956.3	34528.7	58499.8	25129.5	20484.7	62178.5
7	Pavir.Aa02225.1	Pavir.Aa02225.1	13644	18424	546	546	7	7	65	143259	1	1	1	779.897	1557.78	2	1557.78	-0.0001	0	31.58		26	0.016	R	AVAMSATDGLMR	G	2 Oxidation (M)	0.000300000030.0	File835 Spectrum196882 scans: 6574	24302.9	23547.7	14207.7	13274.2	14056.5	13304.7	9588.35	12994
7	Pavir.Aa02225.1	Pavir.Aa02225.1	13644	18424	546	546	7	7	65	137550	1	1	1	771.898	1541.78	2	1541.78	-0.0034	0	50.95	19	26	0.00019	R	AVAMSATDGLMR	G	Oxidation (M)	0.000300000000.0	File837 Spectrum243030 scans: 6860	24270.6	25287.2	22137.3	19887.2	21415.9	17571.8	14625.7	16536.8
7	Pavir.Aa02225.1	Pavir.Aa02225.1	13644	18424	546	546	7	7	65	143251	1	1	1	779.897	1557.78	2	1557.78	-0.0005	0	44.07		26	0.0009	R	AVAMSATDGLMR	G	2 Oxidation (M)	0.000300000030.0	File841 Spectrum332792 scans: 6633	24162.1	24582.1	19323	17150.7	17616.5	16787.4	12660	15382.1
7	Pavir.Aa02225.1	Pavir.Aa02225.1	13644	18424	546	546	7	7	65	412982	1	1	1	1005.52	3013.54	3	3013.54	-0.0009	1	64.57		31	2.7e-05	R	DTADKQINVTCEVQQLLGNNR	V	Deamidated (NQ); Methylthio (C)	0.000000000020000000100.0	File844 Spectrum417460 scans: 22262	24158.2	6697.13	26094.6	12369.5	41070.3	52774.8	20867.2	5424.08
7	Pavir.Aa02225.1	Pavir.Aa02225.1	13644	18424	546	546	7	7	65	412899	1	1	1	1005.19	3012.56	3	3012.56	-0.0005	1	81.29		31	5.8e-07	R	DTADKQINVTCEVQQLLGNNR	V	Methylthio (C)	0.000000000020000000000.0	File846 Spectrum465338 scans: 22406	24156.9	7841.37	25012.4	11422.1	35185.8	44223.9	16212.1	7589
7	Pavir.Aa02225.1	Pavir.Aa02225.1	13644	18424	546	546	7	7	65	137591	1	1	1	514.935	1541.78	3	1541.78	-0.0018	0	39.17	17	26	0.0028	R	AVAMSATDGLMR	G	Oxidation (M)	0.000000000030.0	File839 Spectrum288032 scans: 7711	23866.6	23284	22389.1	15729.2	27163.6	24759.5	17792.9	23992.4
7	Pavir.Aa02225.1	Pavir.Aa02225.1	13644	18424	546	546	7	7	65	137580	1	1	1	771.899	1541.78	2	1541.78	-0.0021	0	48.37		26	0.00034	R	AVAMSATDGLMR	G	Oxidation (M)	0.000300000000.0	File840 Spectrum312095 scans: 9480	23632.7	21398.3	20417.3	18699.5	25328.5	16713.9	13756	16548
7	Pavir.Aa02225.1	Pavir.Aa02225.1	13644	18424	546	546	7	7	65	220154	1	1	1	900.519	1799.02	2	1799.03	-0.005	0	32.33		30	0.031	R	SAPAFIELDTK	L			File842 Spectrum363907 scans: 15291	23531	18680	16982.4	17991.2	18816.2	18273	14633.8	15180.2
7	Pavir.Aa02225.1	Pavir.Aa02225.1	13644	18424	546	546	7	7	65	143181	1	1	1	779.896	1557.78	2	1557.78	-0.0018	0	49.15		26	0.00026	R	AVAMSATDGLMR	G	2 Oxidation (M)	0.000300000030.0	File843 Spectrum379514 scans: 6777	23335.9	23781.4	23580.1	20992.7	23985.2	18643.2	16911.7	18252.2
7	Pavir.Aa02225.1	Pavir.Aa02225.1	13644	18424	546	546	7	7	65	137543	1	1	1	771.898	1541.78	2	1541.78	-0.0036	0	42.22		26	0.0013	R	AVAMSATDGLMR	G	Oxidation (M)	0.000000000030.0	File842 Spectrum358351 scans: 9365	22810	27094.8	17203.5	18201.1	21317.2	20615.6	13711.9	20371.1
7	Pavir.Aa02225.1	Pavir.Aa02225.1	13644	18424	546	546	7	7	65	143225	1	1	1	779.897	1557.78	2	1557.78	-0.0011	0	30.94	15	26	0.018	R	AVAMSATDGLMR	G	2 Oxidation (M)	0.000300000030.0	File837 Spectrum242677 scans: 6484	22711.7	20033.3	17996.8	15177.8	17469.7	13783.6	11749.1	16301.4
7	Pavir.Aa02225.1	Pavir.Aa02225.1	13644	18424	546	546	7	7	65	250413	1	1	1	958.588	1915.16	2	1915.16	-0.0025	0	28.26	17	25	0.028	K	LPYIYNALIVK	S	Deamidated (NQ)	0.00000100000.0	File833 Spectrum166893 scans: 27505	22683.6	19903.6	15193.9	18903.4	13360.8	11520.7	12121.7	18857.6
7	Pavir.Aa02225.1	Pavir.Aa02225.1	13644	18424	546	546	7	7	65	412991	1	1	1	1005.52	3013.55	3	3013.54	0.0045	1	52.37		31	0.00043	R	DTADKQINVTCEVQQLLGNNR	V	Deamidated (NQ); Methylthio (C)	0.000000000020000000100.0	File843 Spectrum393951 scans: 22176	22576.9	10308.1	30176.9	11005.4	37435.9	42380.1	18613.3	5565.34
7	Pavir.Aa02225.1	Pavir.Aa02225.1	13644	18424	546	546	7	7	65	137594	1	1	1	771.899	1541.78	2	1541.78	-0.0018	0	50.13		26	0.00023	R	AVAMSATDGLMR	G	Oxidation (M)	0.000000000030.0	File837 Spectrum244352 scans: 8270	22434.5	20972.7	16135.4	15573.8	14102.1	15392.7	10268.5	15415.7
7	Pavir.Aa02225.1	Pavir.Aa02225.1	13644	18424	546	546	7	7	65	137558	1	1	1	771.898	1541.78	2	1541.78	-0.0029	0	40.73		26	0.002	R	AVAMSATDGLMR	G	Oxidation (M)	0.000000000030.0	File837 Spectrum243963 scans: 7855	22405.2	31034.1	20053.9	17332.4	20139.1	15713.8	11424.8	25079.9
7	Pavir.Aa02225.1	Pavir.Aa02225.1	13644	18424	546	546	7	7	65	132008	1	1	1	763.9	1525.79	2	1525.79	-0.0037	0	32.53		27	0.017	R	AVAMSATDGLMR	G			File842 Spectrum361160 scans: 12361	22396.8	53348.3	36763.9	34120.9	44066.7	25184.5	23532.4	51976.1
7	Pavir.Aa02225.1	Pavir.Aa02225.1	13644	18424	546	546	7	7	65	250152	1	1	1	639.066	1914.18	3	1914.18	-0.0037	0	39.27		25	0.0021	K	LPYIYNALIVK	S			File835 Spectrum215043 scans: 25946	22145.9	14385.4	13232.4	16237.8	11912.9	11534.3	11086.1	15337.2
7	Pavir.Aa02225.1	Pavir.Aa02225.1	13644	18424	546	546	7	7	65	143261	1	1	1	779.897	1557.78	2	1557.78	0	0	32.72		26	0.013	R	AVAMSATDGLMR	G	2 Oxidation (M)	0.000300000030.0	File835 Spectrum196873 scans: 6564	22127.6	19811.1	10839.7	13293.9	9798.9	10217.7	6634.1	10220.3
7	Pavir.Aa02225.1	Pavir.Aa02225.1	13644	18424	546	546	7	7	65	143133	1	1	1	779.895	1557.78	2	1557.78	-0.0034	0	38.73	17	26	0.003	R	AVAMSATDGLMR	G	2 Oxidation (M)	0.000300000030.0	File840 Spectrum309168 scans: 6358	22122	25644.3	16464	15075.4	14383.9	16296.2	10377.9	16256.5
7	Pavir.Aa02225.1	Pavir.Aa02225.1	13644	18424	546	546	7	7	65	220118	1	1	1	600.681	1799.02	3	1799.03	-0.0083	0	31.67	18	30	0.034	R	SAPAFIELDTK	L			File837 Spectrum249627 scans: 13897	22051.3	69594.3	39351.2	27424.4	56794	26178.4	18353.2	61976.7
7	Pavir.Aa02225.1	Pavir.Aa02225.1	13644	18424	546	546	7	7	65	250404	1	1	1	639.394	1915.16	3	1915.16	-0.0044	0	27.25		25	0.035	K	LPYIYNALIVK	S	Deamidated (NQ)	0.00000100000.0	File830 Spectrum94864 scans: 25881	21478.2	15242.7	15734	12870.1	11900	7858.63	11241.7	13677.9
7	Pavir.Aa02225.1	Pavir.Aa02225.1	13644	18424	546	546	7	7	65	414116	1	1	1	1009.55	3025.63	3	3025.62	0.0076	0	66.92	18	31	1.4e-05	R	IFNVLGEPIDNLGPVDTSATFPIHR	S			File834 Spectrum191959 scans: 28694	21393.1	21126.6	15055.2	18370.2	22720.9	21839.9	14487.3	14967.2
7	Pavir.Aa02225.1	Pavir.Aa02225.1	13644	18424	546	546	7	7	65	143186	1	1	1	779.896	1557.78	2	1557.78	-0.0017	0	45.18		26	0.00065	R	AVAMSATDGLMR	G	2 Oxidation (M)	0.000300000030.0	File841 Spectrum332755 scans: 6594	20982	19017.9	16005.6	17134.2	16182.1	16936.1	12150.3	13195.8
7	Pavir.Aa02225.1	Pavir.Aa02225.1	13644	18424	546	546	7	7	65	137552	1	1	1	514.934	1541.78	3	1541.78	-0.0033	0	42.49	17	26	0.0013	R	AVAMSATDGLMR	G	Oxidation (M)	0.000000000030.0	File840 Spectrum311574 scans: 8925	20962.5	31296.8	23124.7	27392.5	22202.1	20180.6	16162.8	18891.2
7	Pavir.Aa02225.1	Pavir.Aa02225.1	13644	18424	546	546	7	7	65	137595	1	1	1	771.899	1541.78	2	1541.78	-0.0017	0	34.75		26	0.0079	R	AVAMSATDGLMR	G	Oxidation (M)	0.000000000030.0	File840 Spectrum311267 scans: 8597	20761.3	20417.9	15701.9	13281.3	13977.8	14665.8	11522.4	14317
7	Pavir.Aa02225.1	Pavir.Aa02225.1	13644	18424	546	546	7	7	65	137635	1	1	1	771.9	1541.79	2	1541.78	0.0014	0	36.33		26	0.0058	R	AVAMSATDGLMR	G	Oxidation (M)	0.000300000000.0	File843 Spectrum382970 scans: 10463	19961.6	18417.9	21353.5	20664.6	20617.4	18096.9	16074.4	16144.4
7	Pavir.Aa02225.1	Pavir.Aa02225.1	13644	18424	546	546	7	7	65	250150	1	1	1	639.066	1914.18	3	1914.18	-0.0039	0	39.48		25	0.002	K	LPYIYNALIVK	S			File839 Spectrum305535 scans: 26381	19914	18286.1	15133.3	14579.5	12518.5	10530.5	12281.3	14720.6
7	Pavir.Aa02225.1	Pavir.Aa02225.1	13644	18424	546	546	7	7	65	132026	1	1	1	509.603	1525.79	3	1525.79	-0.002	0	43.28	23	27	0.0013	R	AVAMSATDGLMR	G			File843 Spectrum385049 scans: 12681	19693.7	32391.1	16241.3	20008.1	21299.9	18624.5	18981	15752
7	Pavir.Aa02225.1	Pavir.Aa02225.1	13644	18424	546	546	7	7	65	220191	1	1	1	600.683	1799.03	3	1799.03	-0.001	0	34.77	18	29	0.016	R	SAPAFIELDTK	L			File843 Spectrum387437 scans: 15228	19641.9	17414.6	19566.9	18381.7	21651.5	18231.4	14146.2	10007.3
7	Pavir.Aa02225.1	Pavir.Aa02225.1	13644	18424	546	546	7	7	65	143161	1	1	1	779.896	1557.78	2	1557.78	-0.0023	0	34.86		26	0.0073	R	AVAMSATDGLMR	G	2 Oxidation (M)	0.000300000030.0	File841 Spectrum332821 scans: 6664	19630.4	19613.2	14383.9	16565.7	13815.4	13343.1	9276.1	13890.9
7	Pavir.Aa02225.1	Pavir.Aa02225.1	13644	18424	546	546	7	7	65	143279	1	1	1	779.898	1557.78	2	1557.78	0.0018	0	35.47		26	0.0066	R	AVAMSATDGLMR	G	2 Oxidation (M)	0.000300000030.0	File838 Spectrum265667 scans: 7234	19528.2	22314.2	11697.4	14364.8	11367.8	14816.2	7586.71	13274.3
7	Pavir.Aa02225.1	Pavir.Aa02225.1	13644	18424	546	546	7	7	65	137582	1	1	1	771.899	1541.78	2	1541.78	-0.0021	0	51.18		26	0.00018	R	AVAMSATDGLMR	G	Oxidation (M)	0.000300000000.0	File842 Spectrum356358 scans: 7239	19387.5	19343.7	19498.8	15715	17921.5	15622.4	12003.7	13846.1
7	Pavir.Aa02225.1	Pavir.Aa02225.1	13644	18424	546	546	7	7	65	220137	1	1	1	600.682	1799.02	3	1799.03	-0.0061	0	34.72	18	30	0.018	R	SAPAFIELDTK	L			File837 Spectrum250915 scans: 15271	19305.3	15205.5	12872	12794.4	13406.6	10681.3	9252.37	10327.9
7	Pavir.Aa02225.1	Pavir.Aa02225.1	13644	18424	546	546	7	7	65	414180	1	1	1	1009.87	3026.6	3	3026.6	-0.0051	0	114.11	24	31	2.8e-10	R	IFNVLGEPIDNLGPVDTSATFPIHR	S	Deamidated (NQ)	0.0010000000000000000000000.0	File828 Spectrum47536 scans: 27521	19133	29993.4	24615.1	25030.8	22233.9	26630.1	24850.6	16492
7	Pavir.Aa02225.1	Pavir.Aa02225.1	13644	18424	546	546	7	7	65	414118	1	1	1	1009.55	3025.63	3	3025.62	0.0091	0	83.97	20	31	2.7e-07	R	IFNVLGEPIDNLGPVDTSATFPIHR	S			File835 Spectrum217021 scans: 28056	19010.3	27079.3	22170.8	16878.7	23912.3	17121.2	13277	15796.9
7	Pavir.Aa02225.1	Pavir.Aa02225.1	13644	18424	546	546	7	7	65	220161	1	1	1	600.682	1799.02	3	1799.03	-0.0043	0	40.3	20	30	0.005	R	SAPAFIELDTK	L			File837 Spectrum249792 scans: 14073	18229.2	16929	16000.9	17268.7	13593.6	10797.7	12448.8	13173.4
7	Pavir.Aa02225.1	Pavir.Aa02225.1	13644	18424	546	546	7	7	65	220143	1	1	1	600.682	1799.02	3	1799.03	-0.0059	0	43.89	21	30	0.0021	R	SAPAFIELDTK	L			File837 Spectrum250883 scans: 15237	17298	13305.8	13486.2	11342.4	7790.75	11500.5	10015.9	11502.9
7	Pavir.Aa02225.1	Pavir.Aa02225.1	13644	18424	546	546	7	7	65	413966	1	1	1	1009.54	3025.61	3	3025.62	-0.0076	0	42.85		31	0.0037	R	IFNVLGEPIDNLGPVDTSATFPIHR	S			File832 Spectrum139082 scans: 23060	17170.9	11149.9	12857.6	12203.6	17944.7	12463.1	9722.61	12747.4
7	Pavir.Aa02225.1	Pavir.Aa02225.1	13644	18424	546	546	7	7	65	143226	1	1	1	779.897	1557.78	2	1557.78	-0.0011	0	33.68		26	0.0098	R	AVAMSATDGLMR	G	2 Oxidation (M)	0.000300000030.0	File836 Spectrum221599 scans: 7558	17144.1	15933.8	13152.6	17248.5	14707.3	12327	9077.22	11861.7
7	Pavir.Aa02225.1	Pavir.Aa02225.1	13644	18424	546	546	7	7	65	137601	1	1	1	771.899	1541.78	2	1541.78	-0.0015	0	34.36		26	0.0086	R	AVAMSATDGLMR	G	Oxidation (M)	0.000300000000.0	File843 Spectrum386034 scans: 13731	17065	22051	19239.1	18904.1	20894	20487.9	15041.8	16828.3
7	Pavir.Aa02225.1	Pavir.Aa02225.1	13644	18424	546	546	7	7	65	137629	1	1	1	514.936	1541.79	3	1541.78	0.0007	0	44.57	26	27	0.00091	R	AVAMSATDGLMR	G	Oxidation (M)	0.000300000000.0	File843 Spectrum382811 scans: 10294	17059.5	20798.7	36809.5	35896.3	17450.2	21229.8	14609.9	11828
7	Pavir.Aa02225.1	Pavir.Aa02225.1	13644	18424	546	546	7	7	65	137583	1	1	1	771.899	1541.78	2	1541.78	-0.0021	0	44.36		26	0.00087	R	AVAMSATDGLMR	G	Oxidation (M)	0.000000000030.0	File842 Spectrum356878 scans: 7794	17019.1	16254.6	15929.4	14841.1	17629.4	14624.7	12186.1	12343.8
7	Pavir.Aa02225.1	Pavir.Aa02225.1	13644	18424	546	546	7	7	65	137535	1	1	1	771.898	1541.78	2	1541.78	-0.004	0	37.08	15	26	0.0043	R	AVAMSATDGLMR	G	Oxidation (M)	0.000000000030.0	File842 Spectrum358371 scans: 9386	17011.2	21359.7	15047.8	15012.3	16441.8	13946.5	12298.6	13218.3
7	Pavir.Aa02225.1	Pavir.Aa02225.1	13644	18424	546	546	7	7	65	143280	1	1	1	779.898	1557.78	2	1557.78	0.002	0	28.56		26	0.032	R	AVAMSATDGLMR	G	2 Oxidation (M)	0.000300000030.0	File838 Spectrum265828 scans: 7406	16952.9	14999.1	11676.5	12897.6	11455.1	9159.02	8643.64	10019.6
7	Pavir.Aa02225.1	Pavir.Aa02225.1	13644	18424	546	546	7	7	65	143282	1	1	1	779.898	1557.78	2	1557.78	0.0023	0	41.92		26	0.0015	R	AVAMSATDGLMR	G	2 Oxidation (M)	0.000300000030.0	File835 Spectrum196999 scans: 6699	16602.6	16967.8	12130.1	12145.6	10639.4	10475	7657.57	9411.98
7	Pavir.Aa02225.1	Pavir.Aa02225.1	13644	18424	546	546	7	7	65	137617	1	1	1	771.899	1541.78	2	1541.78	-0.0004	0	35.83		26	0.0064	R	AVAMSATDGLMR	G	Oxidation (M)	0.000000000030.0	File840 Spectrum311283 scans: 8614	16383.2	16212.2	14455.9	11618.5	10314.3	10715.3	9668.62	9953.49
7	Pavir.Aa02225.1	Pavir.Aa02225.1	13644	18424	546	546	7	7	65	132006	1	1	1	763.9	1525.79	2	1525.79	-0.0042	0	33.01	19	27	0.014	R	AVAMSATDGLMR	G			File828 Spectrum35135 scans: 14293	15881.4	18554	14439.7	13337.4	14164.5	14354.4	9005.15	11150.9
7	Pavir.Aa02225.1	Pavir.Aa02225.1	13644	18424	546	546	7	7	65	250370	1	1	1	639.393	1915.16	3	1915.16	-0.0086	0	29.67	15	26	0.025	K	LPYIYNALIVK	S	Deamidated (NQ)	0.00000100000.0	File832 Spectrum143097 scans: 27343	15808.5	9854.08	9663.65	11249.6	9683.42	6994.23	7643.42	12175.6
7	Pavir.Aa02225.1	Pavir.Aa02225.1	13644	18424	546	546	7	7	65	414181	1	1	1	1009.87	3026.6	3	3026.6	-0.0047	0	84.36	21	31	2.7e-07	R	IFNVLGEPIDNLGPVDTSATFPIHR	S	Deamidated (NQ)	0.0000000000100000000000000.0	File832 Spectrum143546 scans: 27822	15780.7	13382.6	12683.4	13664.6	8553.67	6579.42	8303.16	7667.48
7	Pavir.Aa02225.1	Pavir.Aa02225.1	13644	18424	546	546	7	7	65	414017	1	1	1	1009.55	3025.61	3	3025.62	-0.0032	0	94.46	23	31	2.5e-08	R	IFNVLGEPIDNLGPVDTSATFPIHR	S			File834 Spectrum192419 scans: 29185	15753.4	17363.6	9747.3	12604.1	10384.8	9164.99	6221.55	12511.9
7	Pavir.Aa02225.1	Pavir.Aa02225.1	13644	18424	546	546	7	7	65	414183	1	1	1	1009.87	3026.6	3	3026.6	-0.0041	0	91.98	19	31	4.6e-08	R	IFNVLGEPIDNLGPVDTSATFPIHR	S	Deamidated (NQ)	0.0010000000000000000000000.0	File828 Spectrum47581 scans: 27569	15652.5	14803.1	7592.46	9514.26	11812.6	14290.6	8031.13	9723.65
7	Pavir.Aa02225.1	Pavir.Aa02225.1	13644	18424	546	546	7	7	65	137584	1	1	1	771.899	1541.78	2	1541.78	-0.002	0	29.75	15	26	0.025	R	AVAMSATDGLMR	G	Oxidation (M)	0.000000000030.0	File837 Spectrum244321 scans: 8237	15481.9	17579.8	13016.2	10907.5	10432.7	13300.8	7945.03	10518.5
7	Pavir.Aa02225.1	Pavir.Aa02225.1	13644	18424	546	546	7	7	65	220120	1	1	1	600.681	1799.02	3	1799.03	-0.0077	0	43.7	21	29	0.0021	R	SAPAFIELDTK	L			File837 Spectrum249895 scans: 14183	15461.5	14643.1	12585.3	12877.1	11546.4	8954.82	8139.77	11131.8
7	Pavir.Aa02225.1	Pavir.Aa02225.1	13644	18424	546	546	7	7	65	250104	1	1	1	639.065	1914.17	3	1914.18	-0.0061	0	39.45		26	0.0028	K	LPYIYNALIVK	S			File836 Spectrum238932 scans: 26060	15423	16182.7	7813.97	12363.1	7508.11	7186	9927.65	12164.4
7	Pavir.Aa02225.1	Pavir.Aa02225.1	13644	18424	546	546	7	7	65	137618	1	1	1	771.899	1541.78	2	1541.78	-0.0004	0	31.29		26	0.018	R	AVAMSATDGLMR	G	Oxidation (M)	0.000300000000.0	File843 Spectrum383106 scans: 10608	15050	15276.5	13200.3	10526.4	13067.3	11879.7	9708.13	9891.83
7	Pavir.Aa02225.1	Pavir.Aa02225.1	13644	18424	546	546	7	7	65	143214	1	1	1	520.267	1557.78	3	1557.78	-0.0012	0	27.78		26	0.035	R	AVAMSATDGLMR	G	2 Oxidation (M)	0.000300000030.0	File840 Spectrum309387 scans: 6592	14965.3	24135	13285.1	16899.5	13819.7	12901.9	8745.44	14451.5
7	Pavir.Aa02225.1	Pavir.Aa02225.1	13644	18424	546	546	7	7	65	143173	1	1	1	779.896	1557.78	2	1557.78	-0.0021	0	35.97	15	26	0.0055	R	AVAMSATDGLMR	G	2 Oxidation (M)	0.000300000030.0	File841 Spectrum331282 scans: 5023	14680.7	11977.3	10446.5	10562.1	12218.2	11834.9	9339.89	9040.88
7	Pavir.Aa02225.1	Pavir.Aa02225.1	13644	18424	546	546	7	7	65	137599	1	1	1	771.899	1541.78	2	1541.78	-0.0015	0	27.29		26	0.044	R	AVAMSATDGLMR	G	Oxidation (M)	0.000300000000.0	File843 Spectrum386061 scans: 13760	14576	13358.1	14188.3	14791.1	15040.2	16620.7	13130.4	13408.8
7	Pavir.Aa02225.1	Pavir.Aa02225.1	13644	18424	546	546	7	7	65	143239	1	1	1	779.897	1557.78	2	1557.78	-0.0008	0	42.43		26	0.0013	R	AVAMSATDGLMR	G	2 Oxidation (M)	0.000300000030.0	File843 Spectrum379725 scans: 7002	14506	15194.9	15002.9	13517.2	14275.9	12567.7	12327.8	13117.3
7	Pavir.Aa02225.1	Pavir.Aa02225.1	13644	18424	546	546	7	7	65	143140	1	1	1	520.266	1557.78	3	1557.78	-0.0031	0	29.84		26	0.023	R	AVAMSATDGLMR	G	2 Oxidation (M)	0.000300000030.0	File840 Spectrum309179 scans: 6370	14231.4	44596.6	20817.5	14996.3	14644.4	12661.9	6560.3	15998.7
7	Pavir.Aa02225.1	Pavir.Aa02225.1	13644	18424	546	546	7	7	65	250097	1	1	1	639.065	1914.17	3	1914.18	-0.0066	0	39.36		26	0.0028	K	LPYIYNALIVK	S			File836 Spectrum239247 scans: 26396	14182.3	12073.1	9280.37	9410.98	9702.29	6150.36	7305.45	9205.69
7	Pavir.Aa02225.1	Pavir.Aa02225.1	13644	18424	546	546	7	7	65	250393	1	1	1	639.394	1915.16	3	1915.16	-0.0055	0	28.77		25	0.026	K	LPYIYNALIVK	S	Deamidated (NQ)	0.00000100000.0	File833 Spectrum167230 scans: 27865	14159.2	11740.2	10360.6	9893.74	7091.73	8545.06	5867.71	11603.8
7	Pavir.Aa02225.1	Pavir.Aa02225.1	13644	18424	546	546	7	7	65	143241	1	1	1	779.897	1557.78	2	1557.78	-0.0008	0	33.68	16	26	0.0098	R	AVAMSATDGLMR	G	2 Oxidation (M)	0.000300000030.0	File841 Spectrum332705 scans: 6540	14104.1	14933.4	8265.73	11079.1	10785.9	9308.87	7617.09	9703.47
7	Pavir.Aa02225.1	Pavir.Aa02225.1	13644	18424	546	546	7	7	65	250127	1	1	1	958.095	1914.18	2	1914.18	-0.0051	0	31.35		25	0.013	K	LPYIYNALIVK	S			File835 Spectrum215558 scans: 26495	14055.4	12998.3	9561.65	12238.4	7810.55	7668.15	8114.89	12119.5
7	Pavir.Aa02225.1	Pavir.Aa02225.1	13644	18424	546	546	7	7	65	132058	1	1	1	763.903	1525.79	2	1525.79	0.0008	0	47.65	20	27	0.00051	R	AVAMSATDGLMR	G			File828 Spectrum35113 scans: 14269	13686.2	18667.4	14074	15400.4	13978.5	14917	10311.4	10536.5
7	Pavir.Aa02225.1	Pavir.Aa02225.1	13644	18424	546	546	7	7	65	132068	1	1	1	763.904	1525.79	2	1525.79	0.0028	0	54.64	18	27	0.0001	R	AVAMSATDGLMR	G			File827 Spectrum10335 scans: 14158	13663.2	14495.9	12935.5	9152.48	11344	9484.05	9418.02	8130.51
7	Pavir.Aa02225.1	Pavir.Aa02225.1	13644	18424	546	546	7	7	65	143268	1	1	1	779.897	1557.78	2	1557.78	0.0004	0	31.59		26	0.017	R	AVAMSATDGLMR	G	2 Oxidation (M)	0.000300000030.0	File835 Spectrum197017 scans: 6718	13574	10285.9	6397.51	7822.57	7552.14	6423.41	5320.03	6406.2
7	Pavir.Aa02225.1	Pavir.Aa02225.1	13644	18424	546	546	7	7	65	220172	1	1	1	600.682	1799.03	3	1799.03	-0.0037	0	41.07	20	29	0.0037	R	SAPAFIELDTK	L			File837 Spectrum249923 scans: 14213	13540.2	10829.5	10202.3	6362.96	6036.32	5494.28	6556.22	8953.43
7	Pavir.Aa02225.1	Pavir.Aa02225.1	13644	18424	546	546	7	7	65	143134	1	1	1	779.895	1557.78	2	1557.78	-0.0034	0	46.83		26	0.00047	R	AVAMSATDGLMR	G	2 Oxidation (M)	0.000300000030.0	File841 Spectrum332853 scans: 6698	13325.1	13191.9	10208.9	10729.9	11280.2	10334.6	7586.41	10007.3
7	Pavir.Aa02225.1	Pavir.Aa02225.1	13644	18424	546	546	7	7	65	137536	1	1	1	514.934	1541.78	3	1541.78	-0.0039	0	26.77	16	26	0.046	R	AVAMSATDGLMR	G	Oxidation (M)	0.000000000030.0	File842 Spectrum356890 scans: 7807	13280.7	16787.2	11926.1	11183.2	10859.8	13202.5	10968.5	15326
7	Pavir.Aa02225.1	Pavir.Aa02225.1	13644	18424	546	546	7	7	65	250410	1	1	1	639.394	1915.16	3	1915.16	-0.0033	0	27.04	15	25	0.037	K	LPYIYNALIVK	S	Deamidated (NQ)	0.00000100000.0	File830 Spectrum94953 scans: 25976	12654.6	8496.22	7994.33	10487.8	5534.59	5503.05	4487.74	9138.42
7	Pavir.Aa02225.1	Pavir.Aa02225.1	13644	18424	546	546	7	7	65	414030	1	1	1	1009.55	3025.62	3	3025.62	-0.0023	0	42.3		31	0.0042	R	IFNVLGEPIDNLGPVDTSATFPIHR	S			File833 Spectrum163058 scans: 23414	12557	10577.4	7628.66	5900.16	7631.4	6649.41	6230.57	7849.11
7	Pavir.Aa02225.1	Pavir.Aa02225.1	13644	18424	546	546	7	7	65	412901	2	1	1	1005.19	3012.56	3	3012.56	0.0012	1	57.35		31	0.00014	R	DTADKQINVTCEVQQLLGNNR	V	Methylthio (C)	0.000000000020000000000.0	File845 Spectrum441237 scans: 22338	12374.5	3533.34	14681.1	8419.6	21512.1	25690.2	9026.92	5768.27
7	Pavir.Aa02225.1	Pavir.Aa02225.1	13644	18424	546	546	7	7	65	250167	1	1	1	958.097	1914.18	2	1914.18	-0.0017	0	45.16		25	0.00052	K	LPYIYNALIVK	S			File836 Spectrum239117 scans: 26257	12328.3	11269.1	8031.66	9706.03	6257.95	5501.7	5843.96	9862.68
7	Pavir.Aa02225.1	Pavir.Aa02225.1	13644	18424	546	546	7	7	65	137606	1	1	1	771.899	1541.78	2	1541.78	-0.0012	0	41.91		26	0.0015	R	AVAMSATDGLMR	G	Oxidation (M)	0.000000000030.0	File845 Spectrum429580 scans: 9904	12292.3	12550.4	8884.46	9943.06	9983.05	10017	6769.79	8272.9
7	Pavir.Aa02225.1	Pavir.Aa02225.1	13644	18424	546	546	7	7	65	414185	1	1	1	1009.87	3026.6	3	3026.6	-0.0039	0	105.74		31	1.9e-09	R	IFNVLGEPIDNLGPVDTSATFPIHR	S	Deamidated (NQ)	0.0010000000000000000000000.0	File828 Spectrum47432 scans: 27410	11938	12966.2	8485.14	12319.2	7586.48	4820.18	4085.78	5675.22
7	Pavir.Aa02225.1	Pavir.Aa02225.1	13644	18424	546	546	7	7	65	250110	1	1	1	639.065	1914.17	3	1914.18	-0.0059	0	36.94		26	0.0049	K	LPYIYNALIVK	S			File839 Spectrum305430 scans: 26269	11923.9	10917	8436.21	11977	7043.82	5457.71	5692.46	9923.22
7	Pavir.Aa02225.1	Pavir.Aa02225.1	13644	18424	546	546	7	7	65	220195	1	1	1	600.684	1799.03	3	1799.03	0.0001	0	43.18	19	29	0.0023	R	SAPAFIELDTK	L			File843 Spectrum387391 scans: 15179	11388	10987.1	8381.69	15536.6	8411.43	10667.4	12795.9	8695.57
7	Pavir.Aa02225.1	Pavir.Aa02225.1	13644	18424	546	546	7	7	65	143135	1	1	1	779.895	1557.78	2	1557.78	-0.0033	0	39.69		26	0.0024	R	AVAMSATDGLMR	G	2 Oxidation (M)	0.000300000030.0	File841 Spectrum332870 scans: 6716	11316.7	11054.2	8446.95	10122.4	9779.49	8343.22	6521.39	8566.64
7	Pavir.Aa02225.1	Pavir.Aa02225.1	13644	18424	546	546	7	7	65	250372	1	1	1	958.585	1915.16	2	1915.16	-0.0082	0	29.03	17	26	0.028	K	LPYIYNALIVK	S	Deamidated (NQ)	0.00000100000.0	File833 Spectrum167182 scans: 27813	11286.3	9560.94	7761.88	8825.16	6919.09	6656.24	6365.83	9297.62
7	Pavir.Aa02225.1	Pavir.Aa02225.1	13644	18424	546	546	7	7	65	143203	1	1	1	779.896	1557.78	2	1557.78	-0.0015	0	46.9	16	26	0.00043	R	AVAMSATDGLMR	G	2 Oxidation (M)	0.000300000030.0	File835 Spectrum196735 scans: 6417	11228.1	11129.6	6209.42	6996.89	5921.18	5984.85	4360.24	5755.94
7	Pavir.Aa02225.1	Pavir.Aa02225.1	13644	18424	546	546	7	7	65	220165	1	1	1	600.682	1799.02	3	1799.03	-0.0041	0	44.07	20	30	0.0021	R	SAPAFIELDTK	L			File837 Spectrum251335 scans: 15719	10974.7	11225.3	8884.99	8521.68	11120.3	5494.46	5865.74	6414.05
7	Pavir.Aa02225.1	Pavir.Aa02225.1	13644	18424	546	546	7	7	65	132017	1	1	1	763.901	1525.79	2	1525.79	-0.0025	0	39.5	21	27	0.0031	R	AVAMSATDGLMR	G			File846 Spectrum457471 scans: 14014	10734.9	16532	11277.9	10818.7	12895.4	12691.5	11474.4	10035.3
7	Pavir.Aa02225.1	Pavir.Aa02225.1	13644	18424	546	546	7	7	65	137572	1	1	1	514.935	1541.78	3	1541.78	-0.0024	0	41.26		26	0.0018	R	AVAMSATDGLMR	G	Oxidation (M)	0.000000000030.0	File844 Spectrum405454 scans: 9456	10604.5	10405.7	11360.5	9895.66	10362.1	11265.2	8600.66	10704.7
7	Pavir.Aa02225.1	Pavir.Aa02225.1	13644	18424	546	546	7	7	65	143260	1	1	1	779.897	1557.78	2	1557.78	-0.0001	0	37.92		26	0.0038	R	AVAMSATDGLMR	G	2 Oxidation (M)	0.000300000030.0	File835 Spectrum196752 scans: 6435	10556.4	9740.05	7075.51	8034.87	6330.53	6391.63	3640.6	5207.7
7	Pavir.Aa02225.1	Pavir.Aa02225.1	13644	18424	546	546	7	7	65	137527	1	1	1	514.934	1541.78	3	1541.78	-0.0048	0	37.36	15	26	0.0038	R	AVAMSATDGLMR	G	Oxidation (M)	0.000000000030.0	File837 Spectrum244405 scans: 8327	10292.8	7309.52	5838.37	7528.11	6559.14	7765.93	5394.85	4763.73
7	Pavir.Aa02225.1	Pavir.Aa02225.1	13644	18424	546	546	7	7	65	414188	1	1	1	757.657	3026.6	4	3026.6	-0.0022	0	48.84		31	0.00095	R	IFNVLGEPIDNLGPVDTSATFPIHR	S	Deamidated (NQ)	0.0000000000100000000000000.0	File828 Spectrum42829 scans: 22500	10254.5	8179.85	8014.6	8569.41	10527.2	10056.4	8353.63	8976.98	emPAI	129.91	Quantitation summary for protein	113/115	1.124	407	[1.116]		114/115	0.887	401	[1.073]
7	Pavir.Aa02225.1	Pavir.Aa02225.1	13644	18424	546	546	7	7	65	413937	1	1	1	1009.54	3025.59	3	3025.62	-0.0241	0	34.13		31	0.028	R	IFNVLGEPIDNLGPVDTSATFPIHR	S			File832 Spectrum139118 scans: 23098	10246.7	7732.31	8545.55	7625.54	9329.62	7155.68	6033.54	7956.74
7	Pavir.Aa02225.1	Pavir.Aa02225.1	13644	18424	546	546	7	7	65	220170	1	1	1	600.682	1799.03	3	1799.03	-0.0039	0	36.87	18	30	0.011	R	SAPAFIELDTK	L			File837 Spectrum250927 scans: 15284	10106.5	9854.48	5667.33	8406.94	6813.39	7743.02	6661.08	5833.3
7	Pavir.Aa02225.1	Pavir.Aa02225.1	13644	18424	546	546	7	7	65	220184	1	1	1	600.683	1799.03	3	1799.03	-0.0026	0	37.31	20	30	0.0093	R	SAPAFIELDTK	L			File837 Spectrum249948 scans: 14239	9975.14	4358.93	6627.49	5308.48	5381.16	5411.62	5189.74	5347.84
7	Pavir.Aa02225.1	Pavir.Aa02225.1	13644	18424	546	546	7	7	65	143233	1	1	1	779.897	1557.78	2	1557.78	-0.001	0	29.98		26	0.023	R	AVAMSATDGLMR	G	2 Oxidation (M)	0.000300000030.0	File836 Spectrum219332 scans: 5140	9787.67	9253.39	6261.07	7095.35	6753.82	6539.33	4216.06	5107.92
7	Pavir.Aa02225.1	Pavir.Aa02225.1	13644	18424	546	546	7	7	65	132035	1	1	1	763.902	1525.79	2	1525.79	-0.0007	0	49.68	19	27	0.00032	R	AVAMSATDGLMR	G			File829 Spectrum59882 scans: 14588	9757.01	24112.9	12774.8	16317.5	9928.98	9017.38	6571.46	10237.1
7	Pavir.Aa02225.1	Pavir.Aa02225.1	13644	18424	546	546	7	7	65	414006	1	1	1	1009.55	3025.61	3	3025.62	-0.0038	0	105.25	24	31	2.1e-09	R	IFNVLGEPIDNLGPVDTSATFPIHR	S			File832 Spectrum143621 scans: 27902	9704.13	14646.2	8320.67	9562.47	6383.9	7553.56	6052.69	6985.83
7	Pavir.Aa02225.1	Pavir.Aa02225.1	13644	18424	546	546	7	7	65	220148	1	1	1	600.682	1799.02	3	1799.03	-0.0052	0	39.65	20	30	0.0057	R	SAPAFIELDTK	L			File837 Spectrum250975 scans: 15335	9261.51	8203.96	5268.19	6607.55	6815.99	6164.16	5288.04	7373.74
7	Pavir.Aa02225.1	Pavir.Aa02225.1	13644	18424	546	546	7	7	65	220138	1	1	1	600.682	1799.02	3	1799.03	-0.0061	0	37.13	18	30	0.01	R	SAPAFIELDTK	L			File837 Spectrum251067 scans: 15433	9180.03	7669.24	5384.28	7907.55	7435.93	6581.15	6810.78	6886.05
7	Pavir.Aa02225.1	Pavir.Aa02225.1	13644	18424	546	546	7	7	65	250156	1	1	1	958.096	1914.18	2	1914.18	-0.0034	0	33.4	16	25	0.008	K	LPYIYNALIVK	S			File836 Spectrum239027 scans: 26161	9083.78	8448.91	6152.18	8287.98	5576.62	4928.2	4693.92	8267.29
7	Pavir.Aa02225.1	Pavir.Aa02225.1	13644	18424	546	546	7	7	65	250161	1	1	1	958.096	1914.18	2	1914.18	-0.0028	0	38.18		25	0.0027	K	LPYIYNALIVK	S			File836 Spectrum239152 scans: 26294	9056.42	8290.19	5001.59	7765.62	5603.64	4307	5093.1	7951.13
7	Pavir.Aa02225.1	Pavir.Aa02225.1	13644	18424	546	546	7	7	65	143136	1	1	1	779.895	1557.78	2	1557.78	-0.0033	0	36.84	15	26	0.0046	R	AVAMSATDGLMR	G	2 Oxidation (M)	0.000300000030.0	File841 Spectrum331224 scans: 4961	9045.54	8829.6	8253.63	6802.47	7832.53	7591.09	6033.37	6013.8
7	Pavir.Aa02225.1	Pavir.Aa02225.1	13644	18424	546	546	7	7	65	414058	1	1	1	1009.55	3025.62	3	3025.62	-0.0008	0	60.92		31	5.6e-05	R	IFNVLGEPIDNLGPVDTSATFPIHR	S			File833 Spectrum167156 scans: 27786	8873.19	8717.99	9847.24	12062.5	14455.1	11953.8	8514.78	6116.94
7	Pavir.Aa02225.1	Pavir.Aa02225.1	13644	18424	546	546	7	7	65	143221	1	1	1	779.897	1557.78	2	1557.78	-0.0011	0	42.16		26	0.0014	R	AVAMSATDGLMR	G	2 Oxidation (M)	0.000300000030.0	File835 Spectrum196777 scans: 6462	8849.03	8186.57	5700.42	7092.29	4929.51	4601.09	3976.23	4749.15
7	Pavir.Aa02225.1	Pavir.Aa02225.1	13644	18424	546	546	7	7	65	143138	1	1	1	520.266	1557.78	3	1557.78	-0.0033	0	39.73		26	0.0024	R	AVAMSATDGLMR	G	2 Oxidation (M)	0.000300000030.0	File843 Spectrum379708 scans: 6984	8796.68	32733.5	9819.38	14722.8	11553.7	11088.7	10851.9	9581.27
7	Pavir.Aa02225.1	Pavir.Aa02225.1	13644	18424	546	546	7	7	65	250122	1	1	1	958.095	1914.17	2	1914.18	-0.0054	0	41.61		25	0.0012	K	LPYIYNALIVK	S			File836 Spectrum239019 scans: 26152	8721.12	8075.22	6514.07	7173.54	5145.92	3882.37	4465.64	6453.29
7	Pavir.Aa02225.1	Pavir.Aa02225.1	13644	18424	546	546	7	7	65	414090	1	1	1	1009.55	3025.62	3	3025.62	0.0021	0	77.67	20	31	1.2e-06	R	IFNVLGEPIDNLGPVDTSATFPIHR	S			File833 Spectrum167667 scans: 28331	8691.77	11286.2	8233.38	7267.12	8486.21	7376.79	5480.98	5754.82
7	Pavir.Aa02225.1	Pavir.Aa02225.1	13644	18424	546	546	7	7	65	220186	1	1	1	600.683	1799.03	3	1799.03	-0.0023	0	43.45	18	30	0.0023	R	SAPAFIELDTK	L			File837 Spectrum251095 scans: 15463	8625.99	5407.57	7963.28	8077.1	9584.89	8105.45	5641.33	8189.93
7	Pavir.Aa02225.1	Pavir.Aa02225.1	13644	18424	546	546	7	7	65	143156	1	1	1	779.896	1557.78	2	1557.78	-0.0024	0	37.05		26	0.0044	R	AVAMSATDGLMR	G	2 Oxidation (M)	0.000300000030.0	File835 Spectrum196794 scans: 6480	8330.68	6931.34	5223.32	6063.01	5085.64	4811.59	3677.39	4498.02
7	Pavir.Aa02225.1	Pavir.Aa02225.1	13644	18424	546	546	7	7	65	143253	1	1	1	779.897	1557.78	2	1557.78	-0.0004	0	37.31		26	0.0042	R	AVAMSATDGLMR	G	2 Oxidation (M)	0.000300000030.0	File837 Spectrum242748 scans: 6559	8252.79	9285.18	7536.59	7195.7	8541.06	6500.04	5561.62	5483.5
7	Pavir.Aa02225.1	Pavir.Aa02225.1	13644	18424	546	546	7	7	65	137631	1	1	1	771.9	1541.79	2	1541.78	0.001	0	45.41		26	0.00071	R	AVAMSATDGLMR	G	Oxidation (M)	0.000300000000.0	File843 Spectrum381563 scans: 8962	7986.56	8331.38	7766.17	6171.09	6643.42	7461.98	4583.74	5744.73
7	Pavir.Aa02225.1	Pavir.Aa02225.1	13644	18424	546	546	7	7	65	143124	1	1	1	779.895	1557.78	2	1557.78	-0.004	0	35.86		26	0.0053	R	AVAMSATDGLMR	G	2 Oxidation (M)	0.000300000030.0	File836 Spectrum220561 scans: 6451	7871.2	7483.79	5704.69	6479.25	6061.5	5409.5	3783.59	5561.98
7	Pavir.Aa02225.1	Pavir.Aa02225.1	13644	18424	546	546	7	7	65	250411	1	1	1	639.394	1915.16	3	1915.16	-0.0028	0	28.63		25	0.026	K	LPYIYNALIVK	S	Deamidated (NQ)	0.00000100000.0	File835 Spectrum216275 scans: 27260	7862.19	5468.4	5823.41	5519.58	4689.17	4609.35	4076.47	5890.47
7	Pavir.Aa02225.1	Pavir.Aa02225.1	13644	18424	546	546	7	7	65	137628	1	1	1	771.9	1541.79	2	1541.78	0.0007	0	50.71		27	0.00022	R	AVAMSATDGLMR	G	Oxidation (M)	0.000300000000.0	File837 Spectrum243094 scans: 6928	7815.31	7395.74	7120.6	7644.91	7038.85	6559.64	5609.92	5879.26
7	Pavir.Aa02225.1	Pavir.Aa02225.1	13644	18424	546	546	7	7	65	220167	1	1	1	600.682	1799.02	3	1799.03	-0.0041	0	43.4	19	30	0.0024	R	SAPAFIELDTK	L			File838 Spectrum274735 scans: 16907	7798.92	11417.7	6624.7	8263.63	6630.54	5843.79	6109.9	10464.7
7	Pavir.Aa02225.1	Pavir.Aa02225.1	13644	18424	546	546	7	7	65	143277	1	1	1	779.898	1557.78	2	1557.78	0.0012	0	31.55		26	0.016	R	AVAMSATDGLMR	G	2 Oxidation (M)	0.000300000030.0	File835 Spectrum197034 scans: 6736	7412.57	7089.67	4821.76	4896.74	4844.32	4556.95	2865.85	4322
7	Pavir.Aa02225.1	Pavir.Aa02225.1	13644	18424	546	546	7	7	65	143210	1	1	1	520.267	1557.78	3	1557.78	-0.0014	0	30.27	14	26	0.02	R	AVAMSATDGLMR	G	2 Oxidation (M)	0.000300000030.0	File837 Spectrum242709 scans: 6518	7305.86	10426.2	10379.7	8160.11	5471.45	5873.97	4778.34	5128.1
7	Pavir.Aa02225.1	Pavir.Aa02225.1	13644	18424	546	546	7	7	65	250131	1	1	1	958.095	1914.18	2	1914.18	-0.005	0	51.54		25	0.00012	K	LPYIYNALIVK	S			File836 Spectrum239006 scans: 26138	7298.91	7350.37	4959.34	6851.86	4487.19	3808.96	4007.77	6271.66
7	Pavir.Aa02225.1	Pavir.Aa02225.1	13644	18424	546	546	7	7	65	250140	1	1	1	958.095	1914.18	2	1914.18	-0.0045	0	27.33		25	0.033	K	LPYIYNALIVK	S			File836 Spectrum239176 scans: 26320	6927.69	6823.2	4751.74	5814	3940.13	3410.55	3338.09	4869.11
7	Pavir.Aa02225.1	Pavir.Aa02225.1	13644	18424	546	546	7	7	65	414024	1	1	1	1009.55	3025.62	3	3025.62	-0.0026	0	94.71		31	2.4e-08	R	IFNVLGEPIDNLGPVDTSATFPIHR	S			File833 Spectrum167085 scans: 27710	6790.01	4942.07	6753.44	5380.78	5268.39	4006.34	4002.19	3809.64
7	Pavir.Aa02225.1	Pavir.Aa02225.1	13644	18424	546	546	7	7	65	250137	1	1	1	639.066	1914.18	3	1914.18	-0.0046	0	37.2		25	0.0034	K	LPYIYNALIVK	S			File838 Spectrum283264 scans: 26005	6610.55	5701.48	4317.09	4922.35	4307.4	3480.6	4002.63	4885.93
7	Pavir.Aa02225.1	Pavir.Aa02225.1	13644	18424	546	546	7	7	65	137574	1	1	1	771.899	1541.78	2	1541.78	-0.0024	0	37.79	15	26	0.004	R	AVAMSATDGLMR	G	Oxidation (M)	0.000000000030.0	File845 Spectrum429599 scans: 9924	6544.37	7576.54	6510.03	6402.35	5648.36	5149.71	4262.39	4854.54
7	Pavir.Aa02225.1	Pavir.Aa02225.1	13644	18424	546	546	7	7	65	220183	1	1	1	600.683	1799.03	3	1799.03	-0.0028	0	30.82	17	29	0.041	R	SAPAFIELDTK	L			File827 Spectrum12383 scans: 16343	6456.98	7800.33	7658.62	7551.12	6179.29	5568.44	4140.66	6232.42
7	Pavir.Aa02225.1	Pavir.Aa02225.1	13644	18424	546	546	7	7	65	250416	1	1	1	639.395	1915.16	3	1915.16	-0.0018	0	29.28	15	25	0.022	K	LPYIYNALIVK	S	Deamidated (NQ)	0.00000100000.0	File835 Spectrum216258 scans: 27242	6341.99	8049.38	6157.97	5562.23	3654.43	2583.86	3178.38	6028.37
7	Pavir.Aa02225.1	Pavir.Aa02225.1	13644	18424	546	546	7	7	65	132013	1	1	1	509.603	1525.79	3	1525.79	-0.003	0	37.82	16	27	0.0047	R	AVAMSATDGLMR	G			File845 Spectrum433281 scans: 13852	6273.33	8221.75	5576.53	7643.2	7857.21	5766.52	4975.08	4870.24
7	Pavir.Aa02225.1	Pavir.Aa02225.1	13644	18424	546	546	7	7	65	137533	1	1	1	771.898	1541.78	2	1541.78	-0.004	0	51.85		26	0.00014	R	AVAMSATDGLMR	G	Oxidation (M)	0.000300000000.0	File841 Spectrum333561 scans: 7453	6137.61	5869.76	5602.13	4782.2	5475.01	5519.02	4529.26	4811.94
7	Pavir.Aa02225.1	Pavir.Aa02225.1	13644	18424	546	546	7	7	65	220174	1	1	1	600.682	1799.03	3	1799.03	-0.0035	0	29.99	17	29	0.048	R	SAPAFIELDTK	L			File837 Spectrum251055 scans: 15420	6118.58	4062.83	6175.83	4329.08	5240.77	6037.94	4133.18	4213.25
7	Pavir.Aa02225.1	Pavir.Aa02225.1	13644	18424	546	546	7	7	65	132056	1	1	1	509.604	1525.79	3	1525.79	0.0008	0	64.79		27	9.9e-06	R	AVAMSATDGLMR	G			File843 Spectrum385677 scans: 13351	5958.48	11042.1	6450.93	9054.66	5282.28	6538.2	5770.31	6101.25
7	Pavir.Aa02225.1	Pavir.Aa02225.1	13644	18424	546	546	7	7	65	137569	1	1	1	514.935	1541.78	3	1541.78	-0.0026	0	36.49	15	26	0.0052	R	AVAMSATDGLMR	G	Oxidation (M)	0.000000000030.0	File843 Spectrum382084 scans: 9518	5905.99	7745.59	8171.91	6747.53	6207.78	7618.61	5740.49	6136
7	Pavir.Aa02225.1	Pavir.Aa02225.1	13644	18424	546	546	7	7	65	414115	1	1	1	1009.55	3025.63	3	3025.62	0.0074	0	84.76	25	31	2.3e-07	R	IFNVLGEPIDNLGPVDTSATFPIHR	S			File834 Spectrum192455 scans: 29223	5905.61	8168.9	4653.94	8074.35	6146.14	4482.87	3899.18	5529.47
7	Pavir.Aa02225.1	Pavir.Aa02225.1	13644	18424	546	546	7	7	65	220162	1	1	1	600.682	1799.02	3	1799.03	-0.0043	0	40.1	19	30	0.0052	R	SAPAFIELDTK	L			File838 Spectrum274705 scans: 16875	5896.55	10554.7	6312.29	6368.21	3777.49	4039.3	4501.43	5363.54
7	Pavir.Aa02225.1	Pavir.Aa02225.1	13644	18424	546	546	7	7	65	220194	1	1	1	600.683	1799.03	3	1799.03	-0.0008	0	43.4	21	29	0.0022	R	SAPAFIELDTK	L			File837 Spectrum251295 scans: 15676	5775.71	5919.69	4021.88	3995.45	5465.82	3698.2	3526.98	2558.44
7	Pavir.Aa02225.1	Pavir.Aa02225.1	13644	18424	546	546	7	7	65	143207	1	1	1	520.267	1557.78	3	1557.78	-0.0014	0	28.42	15	26	0.03	R	AVAMSATDGLMR	G	2 Oxidation (M)	0.000300000030.0	File841 Spectrum331267 scans: 5007	5704.27	7140.62	5286.94	6755.86	8855.28	9687.4	5341.28	6162.91
7	Pavir.Aa02225.1	Pavir.Aa02225.1	13644	18424	546	546	7	7	65	414099	1	1	1	1009.55	3025.62	3	3025.62	0.003	0	106.87		31	1.4e-09	R	IFNVLGEPIDNLGPVDTSATFPIHR	S			File833 Spectrum167601 scans: 28260	5639.1	5430.28	5583.47	3996.8	3876.7	4290.43	3682.25	4698.7
7	Pavir.Aa02225.1	Pavir.Aa02225.1	13644	18424	546	546	7	7	65	137592	1	1	1	514.935	1541.78	3	1541.78	-0.0018	0	46.08	17	26	0.00058	R	AVAMSATDGLMR	G	Oxidation (M)	0.000000000030.0	File837 Spectrum244315 scans: 8231	5606.79	9080.7	4502.21	5594.69	4517.19	3048.26	3827.61	5151.64
7	Pavir.Aa02225.1	Pavir.Aa02225.1	13644	18424	546	546	7	7	65	250148	1	1	1	639.066	1914.18	3	1914.18	-0.0041	0	33.18		25	0.0084	K	LPYIYNALIVK	S			File838 Spectrum283309 scans: 26053	5552.2	4643.72	4304.09	3335.6	3254.08	3423.49	3789.38	2877.97
7	Pavir.Aa02225.1	Pavir.Aa02225.1	13644	18424	546	546	7	7	65	250384	1	1	1	639.393	1915.16	3	1915.16	-0.0072	0	26.58		26	0.05	K	LPYIYNALIVK	S	Deamidated (NQ)	0.00000100000.0	File835 Spectrum216235 scans: 27217	5516.44	5868.02	4854.41	4696.88	4050.24	2896.28	3331.98	4758.12
7	Pavir.Aa02225.1	Pavir.Aa02225.1	13644	18424	546	546	7	7	65	413983	1	1	1	1009.54	3025.61	3	3025.62	-0.0052	0	79.61	18	31	7.8e-07	R	IFNVLGEPIDNLGPVDTSATFPIHR	S			File834 Spectrum192470 scans: 29239	5149.6	6587.67	3755.72	4237.8	5355.54	4466.27	3047.81	5706.61
7	Pavir.Aa02225.1	Pavir.Aa02225.1	13644	18424	546	546	7	7	65	414184	1	1	1	1009.87	3026.6	3	3026.6	-0.0039	0	86.08	19	31	1.8e-07	R	IFNVLGEPIDNLGPVDTSATFPIHR	S	Deamidated (NQ)	0.0010000000000000000000000.0	File831 Spectrum120151 scans: 27853	4823.76	4636.67	4362.88	5029.53	4218.5	5262.79	4171.19	5399.41
7	Pavir.Aa02225.1	Pavir.Aa02225.1	13644	18424	546	546	7	7	65	250142	1	1	1	639.066	1914.18	3	1914.18	-0.0044	0	36.25		25	0.0042	K	LPYIYNALIVK	S			File839 Spectrum305597 scans: 26447	4393.73	3747.66	2662.08	3429.65	3247.34	2813.1	2797.46	3520.38
7	Pavir.Aa02225.1	Pavir.Aa02225.1	13644	18424	546	546	7	7	65	143243	1	1	1	779.897	1557.78	2	1557.78	-0.0007	0	42.5	16	26	0.0013	R	AVAMSATDGLMR	G	2 Oxidation (M)	0.000300000030.0	File844 Spectrum403138 scans: 6985	4365.17	5479.16	4258.74	3751.84	3899.85	3389.53	3201.25	3806.27
7	Pavir.Aa02225.1	Pavir.Aa02225.1	13644	18424	546	546	7	7	65	414114	1	1	1	1009.55	3025.62	3	3025.62	0.0069	0	111.19	23	31	5.2e-10	R	IFNVLGEPIDNLGPVDTSATFPIHR	S			File833 Spectrum167587 scans: 28245	4334.9	4655.01	3689.6	4077.43	3726.31	2472.09	2034.01	3253.55
7	Pavir.Aa02225.1	Pavir.Aa02225.1	13644	18424	546	546	7	7	65	414039	1	1	1	1009.55	3025.62	3	3025.62	-0.0017	0	93.26		31	3.3e-08	R	IFNVLGEPIDNLGPVDTSATFPIHR	S			File833 Spectrum167570 scans: 28227	4226.12	5024.57	3978.61	4648.23	3665.87	2734.92	2894.25	3195.25
7	Pavir.Aa02225.1	Pavir.Aa02225.1	13644	18424	546	546	7	7	65	143163	1	1	1	779.896	1557.78	2	1557.78	-0.0022	0	35.66		26	0.0059	R	AVAMSATDGLMR	G	2 Oxidation (M)	0.000300000030.0	File842 Spectrum355788 scans: 6631	4201.63	14213.3	4923.46	6758.11	3095.2	3168.58	2050.39	4287.24
7	Pavir.Aa02225.1	Pavir.Aa02225.1	13644	18424	546	546	7	7	65	220182	1	1	1	600.683	1799.03	3	1799.03	-0.0028	0	29.14	16	29	0.061	R	SAPAFIELDTK	L			File838 Spectrum274663 scans: 16830	4137.37	4525.92	3186.1	2907.81	2633.42	2576.39	2847.95	2144.74
7	Pavir.Aa02225.1	Pavir.Aa02225.1	13644	18424	546	546	7	7	65	143178	1	1	1	779.896	1557.78	2	1557.78	-0.0019	0	37.51		26	0.0038	R	AVAMSATDGLMR	G	2 Oxidation (M)	0.000300000030.0	File842 Spectrum355767 scans: 6609	3993.4	13640.6	4963.96	7506.43	3108.63	3172.71	1988.28	4034.99
7	Pavir.Aa02225.1	Pavir.Aa02225.1	13644	18424	546	546	7	7	65	250134	1	1	1	639.066	1914.18	3	1914.18	-0.0048	0	39.5		25	0.002	K	LPYIYNALIVK	S			File838 Spectrum283219 scans: 25957	3843.91	2972.79	2840.52	2726.52	2051.61	2008.55	1824.17	2620.11
7	Pavir.Aa02225.1	Pavir.Aa02225.1	13644	18424	546	546	7	7	65	414107	1	1	1	1009.55	3025.62	3	3025.62	0.0039	0	89.45	18	31	7.8e-08	R	IFNVLGEPIDNLGPVDTSATFPIHR	S			File833 Spectrum167605 scans: 28265	3836.67	6210.38	4228.53	3893.43	4505.32	2695.36	1754.29	3791.7
7	Pavir.Aa02225.1	Pavir.Aa02225.1	13644	18424	546	546	7	7	65	220169	1	1	1	600.682	1799.03	3	1799.03	-0.0039	0	37.84	21	30	0.0088	R	SAPAFIELDTK	L			File837 Spectrum251457 scans: 15849	3797.09	4447.53	2467.46	3103.6	3894.07	3982.84	3051.98	3586.53
7	Pavir.Aa02225.1	Pavir.Aa02225.1	13644	18424	546	546	7	7	65	250374	1	1	1	639.393	1915.16	3	1915.16	-0.0081	0	28.66	17	26	0.031	K	LPYIYNALIVK	S	Deamidated (NQ)	0.00000100000.0	File833 Spectrum167288 scans: 27926	3760.66	2834.73	1486.86	2018.15	1451.48	1554.87	1207.32	1969.84
7	Pavir.Aa02225.1	Pavir.Aa02225.1	13644	18424	546	546	7	7	65	220132	1	1	1	600.682	1799.02	3	1799.03	-0.0065	0	40.12	19	30	0.0051	R	SAPAFIELDTK	L			File837 Spectrum251492 scans: 15886	3646.21	4961.74	3660.79	3691.87	3681.54	2880.34	2338.83	3814.12
7	Pavir.Aa02225.1	Pavir.Aa02225.1	13644	18424	546	546	7	7	65	250117	1	1	1	639.066	1914.17	3	1914.18	-0.0055	0	25.06	14	25	0.055	K	LPYIYNALIVK	S			File834 Spectrum189600 scans: 26178	3606.87	10313.6	4961.06	7521.72	5149.65	4171.35	2164.93	11098.2
7	Pavir.Aa02225.1	Pavir.Aa02225.1	13644	18424	546	546	7	7	65	143114	1	1	1	520.265	1557.77	3	1557.78	-0.0054	0	30.65		25	0.017	R	AVAMSATDGLMR	G	2 Oxidation (M)	0.000300000030.0	File832 Spectrum124806 scans: 7831	3591.01	7944.27	3990.24	6077.37	3785.7	3193.58	4752.55	4867.99
7	Pavir.Aa02225.1	Pavir.Aa02225.1	13644	18424	546	546	7	7	65	250096	1	1	1	639.065	1914.17	3	1914.18	-0.0066	0	36.39		26	0.0056	K	LPYIYNALIVK	S			File836 Spectrum239326 scans: 26480	3554.53	3363.12	2297.35	2540.47	1849.85	1834.74	1876.1	2638.04
7	Pavir.Aa02225.1	Pavir.Aa02225.1	13644	18424	546	546	7	7	65	250119	1	1	1	639.066	1914.17	3	1914.18	-0.0055	0	36.05		25	0.0044	K	LPYIYNALIVK	S			File835 Spectrum214759 scans: 25643	3474.18	9459.91	6023.09	5083.85	5760.58	3319.49	3627.46	9845.86
7	Pavir.Aa02225.1	Pavir.Aa02225.1	13644	18424	546	546	7	7	65	137528	1	1	1	514.934	1541.78	3	1541.78	-0.0048	0	42.93	16	26	0.0011	R	AVAMSATDGLMR	G	Oxidation (M)	0.000000000030.0	File837 Spectrum244293 scans: 8207	3415.04	6035.98	3504.27	2328.13	2263.5	3380.58	3144.86	3791.7
7	Pavir.Aa02225.1	Pavir.Aa02225.1	13644	18424	546	546	7	7	65	250084	1	1	1	639.064	1914.17	3	1914.18	-0.0088	0	28.13		25	0.03	K	LPYIYNALIVK	S			File834 Spectrum189632 scans: 26212	3301.26	12057.7	4181.38	3634.24	4223.8	2674.92	2381.55	6611.37
7	Pavir.Aa02225.1	Pavir.Aa02225.1	13644	18424	546	546	7	7	65	414012	1	1	1	1009.55	3025.61	3	3025.62	-0.0036	0	89.54	21	31	7.9e-08	R	IFNVLGEPIDNLGPVDTSATFPIHR	S			File830 Spectrum96627 scans: 27761	3161.67	6091.5	3160.28	4406.45	3845.46	2368.35	2342.87	2830.88
7	Pavir.Aa02225.1	Pavir.Aa02225.1	13644	18424	546	546	7	7	65	414007	1	1	1	1009.55	3025.61	3	3025.62	-0.0038	0	76.24		31	1.7e-06	R	IFNVLGEPIDNLGPVDTSATFPIHR	S			File829 Spectrum73010 scans: 28591	2942.13	4225.5	2099.54	3135.29	2124.34	2145	1550.81	2186.22
7	Pavir.Aa02225.1	Pavir.Aa02225.1	13644	18424	546	546	7	7	65	137551	1	1	1	514.934	1541.78	3	1541.78	-0.0033	0	28.62	15	26	0.033	R	AVAMSATDGLMR	G	Oxidation (M)	0.000000000030.0	File837 Spectrum243979 scans: 7872	2857.38	8061.66	3536.76	6004.72	1979.69	3497.06	3292.36	6439.83
7	Pavir.Aa02225.1	Pavir.Aa02225.1	13644	18424	546	546	7	7	65	143118	1	1	1	520.266	1557.77	3	1557.78	-0.0049	0	34.57		26	0.007	R	AVAMSATDGLMR	G	2 Oxidation (M)	0.000300000030.0	File839 Spectrum285473 scans: 4981	2847.57	3552.58	1878	2700.39	1592.64	1492.07	1618.24	2606.65
7	Pavir.Aa02225.1	Pavir.Aa02225.1	13644	18424	546	546	7	7	65	414098	1	1	1	1009.55	3025.62	3	3025.62	0.0028	0	77.01	19	31	1.4e-06	R	IFNVLGEPIDNLGPVDTSATFPIHR	S			File830 Spectrum96600 scans: 27732	2789.71	6301.5	2760.15	3518.94	2974.31	2264.26	2360.16	2384.67
7	Pavir.Aa02225.1	Pavir.Aa02225.1	13644	18424	546	546	7	7	65	250157	1	1	1	639.066	1914.18	3	1914.18	-0.0033	0	28.55		25	0.025	K	LPYIYNALIVK	S			File835 Spectrum214708 scans: 25588	2780.2	7006.12	3613.43	2917.18	3457.85	2048.84	2470.14	7941.04
7	Pavir.Aa02225.1	Pavir.Aa02225.1	13644	18424	546	546	7	7	65	143147	1	1	1	779.896	1557.78	2	1557.78	-0.0028	0	26.19	18	26	0.054	R	AVAMSATDGLMR	G	2 Oxidation (M)	0.000300000030.0	File843 Spectrum379793 scans: 7074	2714.05	2818.1	2940.3	3328.5	2790.27	2825.99	2379.61	2511.36
7	Pavir.Aa02225.1	Pavir.Aa02225.1	13644	18424	546	546	7	7	65	137545	1	1	1	514.934	1541.78	3	1541.78	-0.0035	0	49.86	18	26	0.00024	R	AVAMSATDGLMR	G	Oxidation (M)	0.000000000030.0	File837 Spectrum244277 scans: 8190	2680.74	4160.3	1844.04	3095.72	2531.7	2952.08	2801.41	4404.96
7	Pavir.Aa02225.1	Pavir.Aa02225.1	13644	18424	546	546	7	7	65	414068	1	1	1	757.412	3025.62	4	3025.62	0.0001	0	41.42		31	0.005	R	IFNVLGEPIDNLGPVDTSATFPIHR	S			File835 Spectrum216987 scans: 28019	2676.24	2565.68	2423.31	2570.29	2295.88	1921.15	1612.6	2444.09
7	Pavir.Aa02225.1	Pavir.Aa02225.1	13644	18424	546	546	7	7	65	143193	1	1	1	779.896	1557.78	2	1557.78	-0.0016	0	31.52		26	0.015	R	AVAMSATDGLMR	G	2 Oxidation (M)	0.000300000030.0	File842 Spectrum355835 scans: 6681	2664.05	7349.94	3070.41	4966.29	1954.74	1991.38	1325.65	2778.19
7	Pavir.Aa02225.1	Pavir.Aa02225.1	13644	18424	546	546	7	7	65	250120	1	1	1	639.066	1914.17	3	1914.18	-0.0055	0	35.91		25	0.0045	K	LPYIYNALIVK	S			File836 Spectrum239357 scans: 26513	2238.53	3008.27	1766.6	2029.55	1317.6	1410.24	1543.33	1718.71
7	Pavir.Aa02225.1	Pavir.Aa02225.1	13644	18424	546	546	7	7	65	250138	1	1	1	639.066	1914.18	3	1914.18	-0.0046	0	37.18	15	25	0.0034	K	LPYIYNALIVK	S			File838 Spectrum283358 scans: 26105	1804.24	1576.63	1463.33	1233.35	1689.95	1484.4	1154.2	1384.61
7	Pavir.Aa02225.1	Pavir.Aa02225.1	13644	18424	546	546	7	7	65	250405	1	1	1	639.394	1915.16	3	1915.16	-0.0042	0	26.17		25	0.045	K	LPYIYNALIVK	S	Deamidated (NQ)	0.00000100000.0	File836 Spectrum240083 scans: 27287	1765.39	1491.64	1296.29	1233.66	1102.72	612.584	928.061	1260.16
7	Pavir.Aa02225.1	Pavir.Aa02225.1	13644	18424	546	546	7	7	65	250125	1	1	1	639.066	1914.18	3	1914.18	-0.0052	0	33.48		25	0.0079	K	LPYIYNALIVK	S			File838 Spectrum283168 scans: 25902	1306.03	1036.98	809.753	1207.55	863.415	829.559	501.169	1079.43
7	Pavir.Aa02225.1	Pavir.Aa02225.1	13644	18424	546	546	7	7	65	413993	1	1	1	757.411	3025.61	4	3025.62	-0.0045	0	39.75	16	31	0.0075	R	IFNVLGEPIDNLGPVDTSATFPIHR	S			File833 Spectrum167573 scans: 28230	681.26	837.944	1478.7	798.65	924.323	934.287	954.339	1361.07
7	Pavir.Aa02225.1	Pavir.Aa02225.1	13644	18424	546	546	7	7	65	414063	1	1	1	1009.55	3025.62	3	3025.62	-0.0003	0	83.39	21	31	3.1e-07	R	IFNVLGEPIDNLGPVDTSATFPIHR	S			File833 Spectrum168305 scans: 29011	673.493	755.393	834.77	932.356	636.134	463.724	384.598	632.211
7	Pavir.Aa02225.1	Pavir.Aa02225.1	13644	18424	546	546	7	7	65	414110	1	1	1	1009.55	3025.62	3	3025.62	0.0058	0	98.53	22	31	9.6e-09	R	IFNVLGEPIDNLGPVDTSATFPIHR	S			File833 Spectrum168322 scans: 29029	447.84	460.977	412.225	372.027	279.805	236.553	395.283	368.407
8	Pavir.J00566.1	Pavir.J00566.1	13469	56441	475	475	19	19	55.5	227504	1	1	1	610.645	1828.91	3	1828.92	-0.0023	0	38.82		28	0.0042	K	ADDCIGPEVEK	L	Methylthio (C)	0.00020000000.0	File830 Spectrum82367 scans: 12551	1.29175e+06	610782	1.27862e+06	1.07501e+06	1.13879e+06	1.21328e+06	945958	610910
8	Pavir.J00566.1	Pavir.J00566.1	13469	56441	475	475	19	19	55.5	227510	1	1	1	610.646	1828.91	3	1828.92	-0.0011	0	42.15	16	28	0.0019	K	ADDCIGPEVEK	L	Methylthio (C)	0.00020000000.0	File830 Spectrum82397 scans: 12583	1.13745e+06	638917	1.34532e+06	1.17129e+06	1.08142e+06	1.22486e+06	1.02991e+06	576827
8	Pavir.J00566.1	Pavir.J00566.1	13469	56441	475	475	19	19	55.5	227506	1	1	1	610.645	1828.91	3	1828.92	-0.0019	0	45.43		28	0.00092	K	ADDCIGPEVEK	L	Methylthio (C)	0.00020000000.0	File830 Spectrum82427 scans: 12615	821775	393164	1.0876e+06	914386	996505	825076	875531	522227
8	Pavir.J00566.1	Pavir.J00566.1	13469	56441	475	475	19	19	55.5	293633	2	0	1	1053.08	2104.15	2	2104.13	0.0161	0	34.85		30	0.018	K	LVSALPNGGVCLLENVR	F	Deamidated (NQ); Methylthio (C)	0.00000010002000000.0	File827 Spectrum18212 scans: 22561	324736	385282	322793	246619	288989	303527	199989	272549
8	Pavir.J00566.1	Pavir.J00566.1	13469	56441	475	475	19	19	55.5	227499	1	1	1	610.645	1828.91	3	1828.92	-0.0032	0	44.8	16	28	0.0011	K	ADDCIGPEVEK	L	Methylthio (C)	0.00020000000.0	File830 Spectrum82292 scans: 12471	208488	87002	241385	197769	189455	205907	161480	113684
8	Pavir.J00566.1	Pavir.J00566.1	13469	56441	475	475	19	19	55.5	293579	1	1	1	1053.07	2104.13	2	2104.13	-0.0032	0	46.23		30	0.0013	K	LVSALPNGGVCLLENVR	F	Deamidated (NQ); Methylthio (C)	0.00000010002000000.0	File831 Spectrum119274 scans: 26918	90532.9	91741.9	93586.4	82700.9	74311.5	93006	69597.2	76529.1
8	Pavir.J00566.1	Pavir.J00566.1	13469	56441	475	475	19	19	55.5	227503	1	1	1	610.645	1828.91	3	1828.92	-0.0026	0	49.32	16	28	0.00038	K	ADDCIGPEVEK	L	Methylthio (C)	0.00020000000.0	File831 Spectrum106284 scans: 13062	68894.7	38977.3	68092	65085.1	54926.2	51398.4	47818.6	37277.9
8	Pavir.J00566.1	Pavir.J00566.1	13469	56441	475	475	19	19	55.5	227505	1	1	1	610.645	1828.91	3	1828.92	-0.0021	0	41.4	15	28	0.0023	K	ADDCIGPEVEK	L	Methylthio (C)	0.00020000000.0	File831 Spectrum106328 scans: 13109	60258.4	27370.9	80805.1	44595.1	56233.5	67213.8	39847.1	44901.7
8	Pavir.J00566.1	Pavir.J00566.1	13469	56441	475	475	19	19	55.5	293563	1	1	1	702.383	2104.13	3	2104.13	-0.0061	0	56.88	26	30	0.00012	K	LVSALPNGGVCLLENVR	F	Deamidated (NQ); Methylthio (C)	0.00000010002000000.0	File832 Spectrum142602 scans: 26815	45692	39043.5	48628.6	23594.8	24156	22118.1	32815.8	39083
8	Pavir.J00566.1	Pavir.J00566.1	13469	56441	475	475	19	19	55.5	293562	1	1	1	1053.07	2104.13	2	2104.13	-0.0061	0	56.14	16	30	0.00014	K	LVSALPNGGVCLLENVR	F	Deamidated (NQ); Methylthio (C)	0.00000010002000000.0	File832 Spectrum142678 scans: 26896	41567	33323.6	39017.5	38044.7	28359.3	31720.7	26781.6	36033.5
8	Pavir.J00566.1	Pavir.J00566.1	13469	56441	475	475	19	19	55.5	293577	1	1	1	1053.07	2104.13	2	2104.13	-0.0037	0	68.66	17	30	7.8e-06	K	LVSALPNGGVCLLENVR	F	Deamidated (NQ); Methylthio (C)	0.00000010002000000.0	File831 Spectrum119350 scans: 26999	40541.2	36088.3	42208	33989.6	31351.8	36485.2	28988.5	28577.9
8	Pavir.J00566.1	Pavir.J00566.1	13469	56441	475	475	19	19	55.5	293634	2	0	1	1053.08	2104.15	2	2104.13	0.0161	0	39.5		30	0.0061	K	LVSALPNGGVCLLENVR	F	Deamidated (NQ); Methylthio (C)	0.00000010002000000.0	File827 Spectrum19040 scans: 23444	40253.3	49072.8	40015.4	34884.6	30096.8	43279.5	27309.1	30730.5
8	Pavir.J00566.1	Pavir.J00566.1	13469	56441	475	475	19	19	55.5	293566	1	1	1	1053.07	2104.13	2	2104.13	-0.0059	0	51.81	16	30	0.00038	K	LVSALPNGGVCLLENVR	F	Deamidated (NQ); Methylthio (C)	0.00000010002000000.0	File832 Spectrum142646 scans: 26862	40193.5	36826.8	39652.7	35618.5	27273.7	28137.9	26050.2	29766.3
8	Pavir.J00566.1	Pavir.J00566.1	13469	56441	475	475	19	19	55.5	293571	1	1	1	702.383	2104.13	3	2104.13	-0.0052	0	65.23	19	30	1.7e-05	K	LVSALPNGGVCLLENVR	F	Deamidated (NQ); Methylthio (C)	0.00000010002000000.0	File832 Spectrum143291 scans: 27550	38176.3	28257.2	22735.7	40393.4	22678.1	26580.4	19913.8	29945.7
8	Pavir.J00566.1	Pavir.J00566.1	13469	56441	475	475	19	19	55.5	293561	1	1	1	1053.07	2104.13	2	2104.13	-0.0064	0	48.5	18	30	0.00081	K	LVSALPNGGVCLLENVR	F	Deamidated (NQ); Methylthio (C)	0.00000010002000000.0	File832 Spectrum143336 scans: 27598	38149.4	34201.6	40903.6	37263.1	33483.3	34136.8	26916.2	35573.8
8	Pavir.J00566.1	Pavir.J00566.1	13469	56441	475	475	19	19	55.5	227511	1	1	1	915.465	1828.92	2	1828.92	-0.0003	0	69.12	21	28	3.9e-06	K	ADDCIGPEVEK	L	Methylthio (C)	0.00020000000.0	File830 Spectrum82290 scans: 12468	33327.5	25277.9	48516.8	36488.6	37692.2	40247.2	32082.5	24037.3
8	Pavir.J00566.1	Pavir.J00566.1	13469	56441	475	475	19	19	55.5	293574	1	1	1	702.383	2104.13	3	2104.13	-0.0046	0	70.95	22	30	4.6e-06	K	LVSALPNGGVCLLENVR	F	Deamidated (NQ); Methylthio (C)	0.00000010002000000.0	File832 Spectrum143216 scans: 27470	33049.6	21962.3	23715.3	33574	34394.7	34082.3	22889.9	27972.5
8	Pavir.J00566.1	Pavir.J00566.1	13469	56441	475	475	19	19	55.5	227512	1	1	1	915.466	1828.92	2	1828.92	0.0007	0	68.73	19	28	4.2e-06	K	ADDCIGPEVEK	L	Methylthio (C)	0.00020000000.0	File831 Spectrum106295 scans: 13073	29992.1	20600.8	41600.8	34096.2	33296.9	33768.9	24668.9	22781.6
8	Pavir.J00566.1	Pavir.J00566.1	13469	56441	475	475	19	19	55.5	293569	1	1	1	1053.07	2104.13	2	2104.13	-0.0057	0	51.87		30	0.00037	K	LVSALPNGGVCLLENVR	F	Deamidated (NQ); Methylthio (C)	0.00000010002000000.0	File832 Spectrum142588 scans: 26800	27386.4	27718.1	27861.9	27085.6	19482.6	24858.6	17881	21862.2
8	Pavir.J00566.1	Pavir.J00566.1	13469	56441	475	475	19	19	55.5	227514	1	1	1	915.466	1828.92	2	1828.92	0.0025	0	72.22	22	27	1.9e-06	K	ADDCIGPEVEK	L	Methylthio (C)	0.00020000000.0	File831 Spectrum106333 scans: 13114	26704.7	16406	33290.7	27700.2	26934.8	27834.6	20027.3	19272.4
8	Pavir.J00566.1	Pavir.J00566.1	13469	56441	475	475	19	19	55.5	227502	1	1	1	915.464	1828.91	2	1828.92	-0.003	0	72.82	19	28	1.7e-06	K	ADDCIGPEVEK	L	Methylthio (C)	0.00020000000.0	File831 Spectrum106311 scans: 13090	26248.9	17809.6	35086.5	28310.6	32032.8	31986.4	22154.1	19788.1
8	Pavir.J00566.1	Pavir.J00566.1	13469	56441	475	475	19	19	55.5	227508	1	1	1	915.465	1828.91	2	1828.92	-0.0016	0	54.33		28	0.00012	K	ADDCIGPEVEK	L	Methylthio (C)	0.00020000000.0	File831 Spectrum106278 scans: 13055	24377.9	18529.5	32519.7	25978	27333.8	27639.9	21460.3	18622.2
8	Pavir.J00566.1	Pavir.J00566.1	13469	56441	475	475	19	19	55.5	227496	1	1	1	915.463	1828.91	2	1828.92	-0.0037	0	61.07	19	28	2.5e-05	K	ADDCIGPEVEK	L	Methylthio (C)	0.00020000000.0	File831 Spectrum106321 scans: 13101	22989.6	15834.4	33105	27518.1	30788.7	28116.9	22060.8	20169.3
8	Pavir.J00566.1	Pavir.J00566.1	13469	56441	475	475	19	19	55.5	227509	1	1	1	915.465	1828.91	2	1828.92	-0.0013	0	49.06	18	28	0.0004	K	ADDCIGPEVEK	L	Methylthio (C)	0.00020000000.0	File831 Spectrum106351 scans: 13133	17781.5	13717.7	22706.9	18981.9	18858	20285.9	14875.4	14283.3
8	Pavir.J00566.1	Pavir.J00566.1	13469	56441	475	475	19	19	55.5	227500	1	1	1	610.645	1828.91	3	1828.92	-0.0032	0	47.15	17	28	0.00062	K	ADDCIGPEVEK	L	Methylthio (C)	0.00020000000.0	File831 Spectrum106227 scans: 13001	17672.3	15190	23800.4	23144.2	24150.9	19755.4	15823.4	15740.8
8	Pavir.J00566.1	Pavir.J00566.1	13469	56441	475	475	19	19	55.5	293587	1	1	1	1053.07	2104.13	2	2104.13	-0.0013	0	59.2		30	6.6e-05	K	LVSALPNGGVCLLENVR	F	Deamidated (NQ); Methylthio (C)	0.00000010002000000.0	File831 Spectrum119219 scans: 26859	17104.7	15776.5	18645.3	16454.3	12767.8	15542	13024.4	12960.4
8	Pavir.J00566.1	Pavir.J00566.1	13469	56441	475	475	19	19	55.5	227493	1	1	1	458.235	1828.91	4	1828.92	-0.0043	0	29.25	17	28	0.038	K	ADDCIGPEVEK	L	Methylthio (C)	0.00020000000.0	File830 Spectrum82368 scans: 12552	16056.1	10136.8	15510.9	23982.5	16123.1	19933.9	20043.7	12130.7
8	Pavir.J00566.1	Pavir.J00566.1	13469	56441	475	475	19	19	55.5	293341	1	1	1	702.055	2103.14	3	2103.15	-0.0044	0	35.93	17	30	0.014	K	LVSALPNGGVCLLENVR	F	Methylthio (C)	0.00000000002000000.0	File834 Spectrum190907 scans: 27572	12783.3	12524.4	10588.5	8099.52	6241.47	10452.2	9630.2	11794.4
8	Pavir.J00566.1	Pavir.J00566.1	13469	56441	475	475	19	19	55.5	293568	1	1	1	1053.07	2104.13	2	2104.13	-0.0057	0	61.31		30	4.2e-05	K	LVSALPNGGVCLLENVR	F	Deamidated (NQ); Methylthio (C)	0.00000010002000000.0	File832 Spectrum143265 scans: 27522	12384.2	11754.1	12336.9	11845.3	8483.55	10759	7952.94	8157.42
8	Pavir.J00566.1	Pavir.J00566.1	13469	56441	475	475	19	19	55.5	227501	1	1	1	915.464	1828.91	2	1828.92	-0.0031	0	49.01		28	0.00041	K	ADDCIGPEVEK	L	Methylthio (C)	0.00020000000.0	File831 Spectrum106369 scans: 13152	11443.1	10725.4	15730.2	13219	13726.1	11584.4	11451.1	9481.49
8	Pavir.J00566.1	Pavir.J00566.1	13469	56441	475	475	19	19	55.5	293560	1	1	1	1053.07	2104.13	2	2104.13	-0.0064	0	61.32	20	30	4.2e-05	K	LVSALPNGGVCLLENVR	F	Deamidated (NQ); Methylthio (C)	0.00000010002000000.0	File832 Spectrum143416 scans: 27683	10493.3	10881	10374.9	8335.6	7854.54	8132.03	7931.4	8143.97
8	Pavir.J00566.1	Pavir.J00566.1	13469	56441	475	475	19	19	55.5	227497	1	1	1	458.235	1828.91	4	1828.92	-0.0035	0	35.31	16	28	0.0095	K	ADDCIGPEVEK	L	Methylthio (C)	0.00020000000.0	File830 Spectrum82323 scans: 12504	10116.9	9788.28	19460.6	17729.9	9741.51	12714	7547.91	9734.87
8	Pavir.J00566.1	Pavir.J00566.1	13469	56441	475	475	19	19	55.5	293558	1	1	1	1053.07	2104.13	2	2104.13	-0.0066	0	40.52		30	0.0052	K	LVSALPNGGVCLLENVR	F	Deamidated (NQ); Methylthio (C)	0.00000010002000000.0	File832 Spectrum143196 scans: 27448	9089.29	8874.42	9055.32	8530.64	7111.12	8084.25	5799.83	7229.12
8	Pavir.J00566.1	Pavir.J00566.1	13469	56441	475	475	19	19	55.5	227507	1	1	1	610.645	1828.91	3	1828.92	-0.0019	0	34.38		28	0.012	K	ADDCIGPEVEK	L	Methylthio (C)	0.00020000000.0	File830 Spectrum81770 scans: 11914	8435.29	9461.36	12644.6	9046.79	9988.92	8165.96	8070.68	7275.08
8	Pavir.J00566.1	Pavir.J00566.1	13469	56441	475	475	19	19	55.5	227513	1	1	1	610.646	1828.92	3	1828.92	0.001	0	39.71	17	28	0.0034	K	ADDCIGPEVEK	L	Methylthio (C)	0.00020000000.0	File830 Spectrum82578 scans: 12776	7444.34	12759.2	11388.1	9649.33	8770.6	6943.94	7715.16	7578.91
8	Pavir.J00566.1	Pavir.J00566.1	13469	56441	475	475	19	19	55.5	293589	1	1	1	702.385	2104.13	3	2104.13	-0.001	0	51.82		30	0.00037	K	LVSALPNGGVCLLENVR	F	Deamidated (NQ); Methylthio (C)	0.00000010002000000.0	File832 Spectrum143441 scans: 27710	7249.85	5918.93	4847.59	5904.71	6460.69	6443.46	5121.06	5413.99
8	Pavir.J00566.1	Pavir.J00566.1	13469	56441	475	475	19	19	55.5	227494	1	1	1	458.235	1828.91	4	1828.92	-0.0043	0	41.93		28	0.002	K	ADDCIGPEVEK	L	Methylthio (C)	0.00020000000.0	File830 Spectrum82298 scans: 12477	6005.73	6030.17	8732.65	9606.45	6201.91	6195.97	5244.77	5258.15
8	Pavir.J00566.1	Pavir.J00566.1	13469	56441	475	475	19	19	55.5	227495	1	1	1	610.645	1828.91	3	1828.92	-0.0039	0	37.96		28	0.0051	K	ADDCIGPEVEK	L	Methylthio (C)	0.00020000000.0	File830 Spectrum82631 scans: 12832	4765.68	7530.59	5149.02	5444.55	4820.75	5025.67	4698.99	4545.11
8	Pavir.J00566.1	Pavir.J00566.1	13469	56441	475	475	19	19	55.5	293554	1	1	1	702.382	2104.12	3	2104.13	-0.009	0	46.89	17	30	0.0011	K	LVSALPNGGVCLLENVR	F	Deamidated (NQ); Methylthio (C)	0.00000010002000000.0	File832 Spectrum142754 scans: 26977	4686.63	4123.68	4930.79	4561.29	3485.87	3985.86	3202.63	2736.7
8	Pavir.J00566.1	Pavir.J00566.1	13469	56441	475	475	19	19	55.5	293556	1	1	1	702.382	2104.12	3	2104.13	-0.0079	0	58.67	18	30	8e-05	K	LVSALPNGGVCLLENVR	F	Deamidated (NQ); Methylthio (C)	0.00000010002000000.0	File832 Spectrum143143 scans: 27392	4625.88	4158.88	3863.18	4451.81	3361.34	2944.15	4440.94	2537.14
8	Pavir.J00566.1	Pavir.J00566.1	13469	56441	475	475	19	19	55.5	249283	1	1	1	956.548	1911.08	2	1911.09	-0.0066	0	74.97		30	1.7e-06	K	ELPGVVALDEAVPVTV	-			File840 Spectrum328419 scans: 26893	4335.79	5965.98	4143.86	3510.33	4235.54	2665.95	2818.02	3687.43
8	Pavir.J00566.1	Pavir.J00566.1	13469	56441	475	475	19	19	55.5	227498	1	1	1	610.645	1828.91	3	1828.92	-0.0032	0	45.12		28	0.001	K	ADDCIGPEVEK	L	Methylthio (C)	0.00020000000.0	File831 Spectrum106407 scans: 13193	4311.34	7106.64	5843.72	5176.33	5765.68	4398.17	3458.46	2768.1
8	Pavir.J00566.1	Pavir.J00566.1	13469	56441	475	475	19	19	55.5	293601	1	1	1	702.387	2104.14	3	2104.13	0.0053	0	58.23		30	8.6e-05	K	LVSALPNGGVCLLENVR	F	Deamidated (NQ); Methylthio (C)	0.00000010002000000.0	File831 Spectrum119190 scans: 26828	3885.89	3128.52	4047.7	4131.69	2916.04	4038.46	2155.98	3485.63
8	Pavir.J00566.1	Pavir.J00566.1	13469	56441	475	475	19	19	55.5	293591	1	1	1	702.385	2104.13	3	2104.13	-0.0008	0	64		30	2.2e-05	K	LVSALPNGGVCLLENVR	F	Deamidated (NQ); Methylthio (C)	0.00000010002000000.0	File831 Spectrum119860 scans: 27543	2933.34	4684.31	2194.72	3496.85	1129.71	1748.93	2027.6	2631.32
8	Pavir.J00566.1	Pavir.J00566.1	13469	56441	475	475	19	19	55.5	293599	1	1	1	702.386	2104.13	3	2104.13	0.0021	0	35.45	24	30	0.016	K	LVSALPNGGVCLLENVR	F	Deamidated (NQ); Methylthio (C)	0.00000010002000000.0	File831 Spectrum119494 scans: 27152	2500.07	963.08	2156.7	1838.99	794.497	1088.45	882.265	1272.49
8	Pavir.J00566.1	Pavir.J00566.1	13469	56441	475	475	19	19	55.5	249313	1	1	1	956.551	1911.09	2	1911.09	-0.0001	0	55.53		29	0.00014	K	ELPGVVALDEAVPVTV	-			File841 Spectrum351425 scans: 26508	2419.65	3199.81	2916.18	2427.84	2307.4	1913.37	2026.73	3767.03
8	Pavir.J00566.1	Pavir.J00566.1	13469	56441	475	475	19	19	55.5	293774	1	1	1	702.709	2105.11	3	2105.12	-0.0103	0	46.33	25	30	0.0012	K	LVSALPNGGVCLLENVR	F	2 Deamidated (NQ); Methylthio (C)	0.00000010002000100.0	File828 Spectrum46699 scans: 26628	2203.47	2107.58	2114.59	2494.69	1741.39	2617.65	2015.4	2367.85
8	Pavir.J00566.1	Pavir.J00566.1	13469	56441	475	475	19	19	55.5	293779	1	1	1	702.711	2105.11	3	2105.12	-0.0063	0	48.73	21	30	0.00074	K	LVSALPNGGVCLLENVR	F	2 Deamidated (NQ); Methylthio (C)	0.00000010002000100.0	File828 Spectrum46771 scans: 26705	1943.55	2241.66	3947.61	2876.09	2497.92	1680.64	2212.74	2618.99
8	Pavir.J00566.1	Pavir.J00566.1	13469	56441	475	475	19	19	55.5	293598	1	1	1	702.385	2104.13	3	2104.13	0.0018	0	62.22		30	3.3e-05	K	LVSALPNGGVCLLENVR	F	Deamidated (NQ); Methylthio (C)	0.00000010002000000.0	File831 Spectrum119786 scans: 27464	1859.27	1889.54	2280.48	2473.86	1904.42	1155.87	1048.3	1091.99
8	Pavir.J00566.1	Pavir.J00566.1	13469	56441	475	475	19	19	55.5	293580	1	1	1	702.384	2104.13	3	2104.13	-0.0032	0	50.74	25	30	0.00046	K	LVSALPNGGVCLLENVR	F	Deamidated (NQ); Methylthio (C)	0.00000010002000000.0	File832 Spectrum143494 scans: 27766	1673.16	1504.33	888.448	1011.11	1533.14	1404.82	903.811	1734.4
8	Pavir.J00566.1	Pavir.J00566.1	13469	56441	475	475	19	19	55.5	293775	1	1	1	702.71	2105.11	3	2105.12	-0.0083	0	32.9	18	30	0.028	K	LVSALPNGGVCLLENVR	F	2 Deamidated (NQ); Methylthio (C)	0.00000010002000100.0	File828 Spectrum48072 scans: 28092	1231.28	2995.7	1880.22	1971.3	1888.39	1341.71	1432.43	1785.98
8	Pavir.J00566.1	Pavir.J00566.1	13469	56441	475	475	19	19	55.5	293588	1	1	1	702.385	2104.13	3	2104.13	-0.001	0	49.51		30	0.00064	K	LVSALPNGGVCLLENVR	F	Deamidated (NQ); Methylthio (C)	0.00000010002000000.0	File832 Spectrum143515 scans: 27788	1072.5	1249.06	928.848	1482.76	1793.7	777.346	1113.78	1043.78
9	Pavir.J01685.1	Pavir.J01685.1	12930	89351	586	586	33	33	51.9	242592	1	1	1	943.007	1884	2	1884	-0.0046	0	66.19	24	29	1.1e-05	K	AVITVPAYFNDSQR	T			File828 Spectrum38624 scans: 18015	600453	428936	682776	591050	963463	1.01322e+06	846134	573351
9	Pavir.J01685.1	Pavir.J01685.1	12930	89351	586	586	33	33	51.9	242591	1	1	1	943.007	1884	2	1884	-0.0048	0	44.28	28	29	0.0017	K	AVITVPAYFNDSQR	T			File828 Spectrum38534 scans: 17919	530092	525412	723292	532672	1.04332e+06	1.0094e+06	850426	594429
9	Pavir.J01685.1	Pavir.J01685.1	12930	89351	586	586	33	33	51.9	242586	1	1	1	943.007	1884	2	1884	-0.0059	0	65.9	24	29	1.2e-05	K	AVITVPAYFNDSQR	T			File828 Spectrum38654 scans: 18047	390777	410975	550847	480170	806802	826273	633185	460453
9	Pavir.J01685.1	Pavir.J01685.1	12930	89351	586	586	33	33	51.9	101310	1	1	1	715.392	1428.77	2	1428.77	-0.0051	0	31.06		28	0.029	R	MVNEAEK	F	Deamidated (NQ)	0.0010000.0	File828 Spectrum28424 scans: 7134	273015	266759	322893	336209	393022	372292	375378	349908
9	Pavir.J01685.1	Pavir.J01685.1	12930	89351	586	586	33	33	51.9	242941	1	1	1	943.501	1884.99	2	1884.99	-0.0019	0	66.06	17	29	1.1e-05	K	AVITVPAYFNDSQR	T	Deamidated (NQ)	0.00000000010000.0	File845 Spectrum436817 scans: 17624	264889	241351	305957	265936	432670	436082	346797	249342
9	Pavir.J01685.1	Pavir.J01685.1	12930	89351	586	586	33	33	51.9	242596	1	1	1	943.008	1884	2	1884	-0.0043	0	52.78	29	29	0.00023	K	AVITVPAYFNDSQR	T			File828 Spectrum38714 scans: 18111	205101	190851	257524	235795	379890	313876	272303	215259
9	Pavir.J01685.1	Pavir.J01685.1	12930	89351	586	586	33	33	51.9	242943	1	1	1	943.501	1884.99	2	1884.99	-0.0015	0	61.63	21	29	3.1e-05	K	AVITVPAYFNDSQR	T	Deamidated (NQ)	0.00000000000010.0	File845 Spectrum437252 scans: 18088	193077	142412	194317	160583	281932	261394	221765	155278
9	Pavir.J01685.1	Pavir.J01685.1	12930	89351	586	586	33	33	51.9	242934	1	1	1	943.5	1884.99	2	1884.99	-0.0026	0	58.96	20	29	5.6e-05	K	AVITVPAYFNDSQR	T	Deamidated (NQ)	0.00000000010000.0	File845 Spectrum436759 scans: 17562	141321	121063	140805	133053	189147	246022	157631	128707
9	Pavir.J01685.1	Pavir.J01685.1	12930	89351	586	586	33	33	51.9	207417	1	1	1	878.503	1754.99	2	1755	-0.0067	0	76.93	21	30	1e-06	K	DAVAGGSTQTIK	D			File833 Spectrum147191 scans: 6490	103345	78819	78851.8	94329.8	82535.5	73346.1	101184	91485.1
9	Pavir.J01685.1	Pavir.J01685.1	12930	89351	586	586	33	33	51.9	242594	1	1	1	943.007	1884	2	1884	-0.0045	0	54.14	28	29	0.00017	K	AVITVPAYFNDSQR	T			File828 Spectrum38746 scans: 18145	83202	60940.6	97677.4	79687.9	134876	135139	120636	74073.8
9	Pavir.J01685.1	Pavir.J01685.1	12930	89351	586	586	33	33	51.9	242961	1	1	1	943.502	1884.99	2	1884.99	-0.0002	0	54	18	29	0.00018	K	AVITVPAYFNDSQR	T	Deamidated (NQ)	0.00000000010000.0	File845 Spectrum437312 scans: 18152	72500.8	61899.3	89172.1	78393.9	148558	136025	113739	88088
9	Pavir.J01685.1	Pavir.J01685.1	12930	89351	586	586	33	33	51.9	242935	1	1	1	943.5	1884.99	2	1884.99	-0.0025	0	53.04	16	29	0.00023	K	AVITVPAYFNDSQR	T	Deamidated (NQ)	0.00000000010000.0	File844 Spectrum412877 scans: 17374	67851.9	78598.9	88613.1	71982.3	123823	119863	96944.2	77560.5
9	Pavir.J01685.1	Pavir.J01685.1	12930	89351	586	586	33	33	51.9	101309	1	1	1	477.264	1428.77	3	1428.77	-0.0053	0	28.03		28	0.058	R	MVNEAEK	F	Deamidated (NQ)	0.0010000.0	File828 Spectrum28513 scans: 7229	67837.4	40531.3	58145.5	74869.3	68193.5	72732.7	70106.1	75464
9	Pavir.J01685.1	Pavir.J01685.1	12930	89351	586	586	33	33	51.9	444486	2	1	1	903.24	3608.93	4	3608.92	0.012	0	47.86		31	0.0011	K	VVGIDLGTTNSAVAAMEGGKPTIVTNAEGAR	T	2 Deamidated (NQ)	0.0000000001000000000000000100000.0	File843 Spectrum387703 scans: 15512	66036.6	43709.1	39399.5	62641.4	37179.1	35500.2	39661.7	40618.9
9	Pavir.J01685.1	Pavir.J01685.1	12930	89351	586	586	33	33	51.9	242947	1	1	1	943.501	1884.99	2	1884.99	-0.0013	0	55.35	19	29	0.00013	K	AVITVPAYFNDSQR	T	Deamidated (NQ)	0.00000000010000.0	File844 Spectrum412907 scans: 17406	61629	61617.7	82213.6	67947	104729	109695	85740.5	70104.9
9	Pavir.J01685.1	Pavir.J01685.1	12930	89351	586	586	33	33	51.9	444450	1	1	1	1203.65	3607.94	3	3607.93	0.0033	0	47.17		31	0.0013	K	VVGIDLGTTNSAVAAMEGGKPTIVTNAEGAR	T	Deamidated (NQ)	0.0000000001000000000000000000000.0	File843 Spectrum391574 scans: 19641	51104	44458.2	53451.6	47579	50047.9	53936.2	56975	44733.5
9	Pavir.J01685.1	Pavir.J01685.1	12930	89351	586	586	33	33	51.9	444696	1	1	1	906.738	3622.92	4	3622.95	-0.0232	0	42.92	18	31	0.0037	K	VVGIDLGTTNSAVAAMEGGKPTIVTNAEGAR	T	Oxidation (M)	0.0000000000000003000000000000000.0	File842 Spectrum365021 scans: 16480	48520	39992.7	40565.7	47864	45013.3	39702.4	40791.1	42435.2
9	Pavir.J01685.1	Pavir.J01685.1	12930	89351	586	586	33	33	51.9	242619	1	1	1	943.01	1884	2	1884	0	0	34.85	27	29	0.016	K	AVITVPAYFNDSQR	T			File827 Spectrum13882 scans: 17942	48488.7	45045.6	57848.2	51391	85345	90654.6	59572.4	50989.5
9	Pavir.J01685.1	Pavir.J01685.1	12930	89351	586	586	33	33	51.9	242959	1	1	1	629.337	1884.99	3	1884.99	-0.0003	0	45.24	17	29	0.0013	K	AVITVPAYFNDSQR	T	Deamidated (NQ)	0.00000000010000.0	File844 Spectrum412875 scans: 17372	45897.1	23104.5	20333	27323.5	24969.5	38819	46989.4	59498.9
9	Pavir.J01685.1	Pavir.J01685.1	12930	89351	586	586	33	33	51.9	444449	1	1	1	902.991	3607.94	4	3607.93	0.0029	0	51.57	16	31	0.00047	K	VVGIDLGTTNSAVAAMEGGKPTIVTNAEGAR	T	Deamidated (NQ)	0.0000000001000000000000000000000.0	File843 Spectrum391528 scans: 19592	43932.1	39080.5	34099.2	48946.8	35020.7	60254.3	45148.3	45854.7
9	Pavir.J01685.1	Pavir.J01685.1	12930	89351	586	586	33	33	51.9	207432	1	1	1	878.504	1754.99	2	1755	-0.0046	0	76.63	24	30	1.2e-06	K	DAVAGGSTQTIK	D			File833 Spectrum147238 scans: 6540	42668.7	28694.4	28440.6	40294.2	35553	26469	40666.8	39127.8
9	Pavir.J01685.1	Pavir.J01685.1	12930	89351	586	586	33	33	51.9	242923	1	1	1	943.5	1884.98	2	1884.99	-0.004	0	70.53		29	3.9e-06	K	AVITVPAYFNDSQR	T	Deamidated (NQ)	0.00000000010000.0	File828 Spectrum38942 scans: 18354	42444.4	38845.1	55790.7	46713.4	79827.6	79064.5	67992.1	48915.4
9	Pavir.J01685.1	Pavir.J01685.1	12930	89351	586	586	33	33	51.9	242914	1	1	1	629.334	1884.98	3	1884.99	-0.008	0	56.6		29	9e-05	K	AVITVPAYFNDSQR	T	Deamidated (NQ)	0.00000000010000.0	File828 Spectrum38954 scans: 18367	42182.9	44432.7	19330.1	36536.9	30732.5	31351.2	23872.3	17792.5
9	Pavir.J01685.1	Pavir.J01685.1	12930	89351	586	586	33	33	51.9	444399	1	1	1	1203.32	3606.95	3	3606.95	-0.0037	0	33.08	16	30	0.03	K	VVGIDLGTTNSAVAAMEGGKPTIVTNAEGAR	T			File846 Spectrum464148 scans: 21137	41960.3	32598.4	34715.8	48673.2	48774.8	47548	46405.1	40585.3
9	Pavir.J01685.1	Pavir.J01685.1	12930	89351	586	586	33	33	51.9	242595	1	1	1	943.007	1884	2	1884	-0.0045	0	42.86	26	29	0.0023	K	AVITVPAYFNDSQR	T			File828 Spectrum38448 scans: 17827	39655.2	38867.5	46433.3	37242.5	62973.3	62790.6	52549.7	33398.8
9	Pavir.J01685.1	Pavir.J01685.1	12930	89351	586	586	33	33	51.9	242929	1	1	1	943.5	1884.99	2	1884.99	-0.0032	0	61.39	17	29	3.3e-05	K	AVITVPAYFNDSQR	T	Deamidated (NQ)	0.00000000010000.0	File845 Spectrum437018 scans: 17838	38797.3	28837.2	39668.2	37741.7	60601.2	64830.9	50050.5	35304.7
9	Pavir.J01685.1	Pavir.J01685.1	12930	89351	586	586	33	33	51.9	242919	1	1	1	943.499	1884.98	2	1884.99	-0.0051	0	59.47		29	4.9e-05	K	AVITVPAYFNDSQR	T	Deamidated (NQ)	0.00000000010000.0	File828 Spectrum38969 scans: 18383	36785.5	34405.3	47148.9	42194.1	57454.3	57046.3	53739.3	35315.9
9	Pavir.J01685.1	Pavir.J01685.1	12930	89351	586	586	33	33	51.9	106048	1	1	1	723.389	1444.76	2	1444.77	-0.0061	0	30.77		28	0.029	R	MVNEAEK	F	Deamidated (NQ); Oxidation (M)	0.3010000.0	File846 Spectrum448294 scans: 4226	35409.7	34480.6	27108.6	34418.1	33549.6	28948.7	29546.7	29833.6
9	Pavir.J01685.1	Pavir.J01685.1	12930	89351	586	586	33	33	51.9	444471	1	1	1	903.234	3608.91	4	3608.92	-0.0094	0	43.77		31	0.003	K	VVGIDLGTTNSAVAAMEGGKPTIVTNAEGAR	T	2 Deamidated (NQ)	0.0000000001000000000000000100000.0	File842 Spectrum367930 scans: 19583	35216.9	40450.3	41998.6	50229.8	41490.1	44364.7	39956.4	47682.1
9	Pavir.J01685.1	Pavir.J01685.1	12930	89351	586	586	33	33	51.9	242920	1	1	1	943.499	1884.98	2	1884.99	-0.0048	0	55.55		29	0.00012	K	AVITVPAYFNDSQR	T	Deamidated (NQ)	0.00000000000010.0	File846 Spectrum461065 scans: 17848	34573.5	34346.5	40716.3	36776.8	51984.1	58733	45950.8	38937.2
9	Pavir.J01685.1	Pavir.J01685.1	12930	89351	586	586	33	33	51.9	444444	1	1	1	902.991	3607.93	4	3607.93	-0.0008	0	33.89		31	0.028	K	VVGIDLGTTNSAVAAMEGGKPTIVTNAEGAR	T	Deamidated (NQ)	0.0000000000000000000000000100000.0	File844 Spectrum416867 scans: 21630	34456.2	25433.2	43363.8	48995.2	39070.9	35120.2	48611.6	41527.1
9	Pavir.J01685.1	Pavir.J01685.1	12930	89351	586	586	33	33	51.9	444754	1	1	1	907.235	3624.91	4	3624.91	-0.0034	0	48.92	16	31	0.00095	K	VVGIDLGTTNSAVAAMEGGKPTIVTNAEGAR	T	2 Deamidated (NQ); Oxidation (M)	0.0000000001000003000000000100000.0	File840 Spectrum318534 scans: 16349	29745	20188.1	19673.3	35707.5	20790.9	21174.1	21988.4	20348.7
9	Pavir.J01685.1	Pavir.J01685.1	12930	89351	586	586	33	33	51.9	444447	1	1	1	902.991	3607.93	4	3607.93	0.0007	0	41.63	16	31	0.0046	K	VVGIDLGTTNSAVAAMEGGKPTIVTNAEGAR	T	Deamidated (NQ)	0.0000000000000000000000000100000.0	File845 Spectrum439819 scans: 20826	29644	25497.1	41255.7	21480.2	37265.4	30903.6	29637.9	28746.1
9	Pavir.J01685.1	Pavir.J01685.1	12930	89351	586	586	33	33	51.9	444730	1	1	1	906.988	3623.92	4	3623.93	-0.005	0	41.06	17	31	0.0057	K	VVGIDLGTTNSAVAAMEGGKPTIVTNAEGAR	T	Deamidated (NQ); Oxidation (M)	0.0000000001000003000000000000000.0	File842 Spectrum365048 scans: 16509	29480.4	24042.1	26961	28594.9	25144.9	28801.3	23941.3	20931.7
9	Pavir.J01685.1	Pavir.J01685.1	12930	89351	586	586	33	33	51.9	242945	1	1	1	943.501	1884.99	2	1884.99	-0.0014	0	46.41	17	29	0.001	K	AVITVPAYFNDSQR	T	Deamidated (NQ)	0.00000000010000.0	File845 Spectrum437182 scans: 18013	29403.8	27650.1	41669.9	31544.6	43094.2	53450.6	38643.7	26907.4
9	Pavir.J01685.1	Pavir.J01685.1	12930	89351	586	586	33	33	51.9	242951	1	1	1	943.501	1884.99	2	1884.99	-0.0009	0	40.64	21	29	0.0038	K	AVITVPAYFNDSQR	T	Deamidated (NQ)	0.00000000010000.0	File844 Spectrum413407 scans: 17939	28581	21633.1	29737.1	29418.8	36094.5	40073.9	30309.6	22277.1
9	Pavir.J01685.1	Pavir.J01685.1	12930	89351	586	586	33	33	51.9	444732	1	1	1	906.989	3623.92	4	3623.93	-0.0043	0	31.46	15	31	0.052	K	VVGIDLGTTNSAVAAMEGGKPTIVTNAEGAR	T	Deamidated (NQ); Oxidation (M)	0.0000000000000003000000000100000.0	File842 Spectrum364966 scans: 16421	28564.4	19378.3	19616.4	27751.7	18768.4	22906.2	18928.2	19664.8
9	Pavir.J01685.1	Pavir.J01685.1	12930	89351	586	586	33	33	51.9	242921	1	1	1	943.499	1884.98	2	1884.99	-0.0046	0	53.4		29	0.0002	K	AVITVPAYFNDSQR	T	Deamidated (NQ)	0.00000000010000.0	File846 Spectrum461210 scans: 18003	27834.1	24853.9	31425.4	26412	44285.3	42731.5	40271.8	30024.2
9	Pavir.J01685.1	Pavir.J01685.1	12930	89351	586	586	33	33	51.9	187857	1	1	1	844.934	1687.85	2	1687.85	-0.0017	0	43.27	24	27	0.0013	K	MNEVDEESK	Q			File845 Spectrum426786 scans: 6924	27798.5	19725.7	33001.2	30227.2	44960	44099.8	39241.7	25976.8
9	Pavir.J01685.1	Pavir.J01685.1	12930	89351	586	586	33	33	51.9	242926	1	1	1	943.5	1884.98	2	1884.99	-0.0038	0	47.17		29	0.00084	K	AVITVPAYFNDSQR	T	Deamidated (NQ)	0.00000000000010.0	File828 Spectrum39004 scans: 18420	27346.2	22729.8	30564.8	30438.9	39677.7	38939.1	35156	28062.2
9	Pavir.J01685.1	Pavir.J01685.1	12930	89351	586	586	33	33	51.9	207421	1	1	1	586.005	1754.99	3	1755	-0.0063	0	47.38	16	30	0.00097	K	DAVAGGSTQTIK	D			File833 Spectrum146994 scans: 6280	27170.8	25251.1	29382.9	34065.1	28779.3	23199.5	26121.9	22546.1
9	Pavir.J01685.1	Pavir.J01685.1	12930	89351	586	586	33	33	51.9	242614	1	1	1	629.009	1884	3	1884	-0.0006	0	48.28	20	29	0.00066	K	AVITVPAYFNDSQR	T			File827 Spectrum13877 scans: 17937	27073.8	16042.6	34111.1	15210	29799.4	18375.8	21104.8	23857.9
9	Pavir.J01685.1	Pavir.J01685.1	12930	89351	586	586	33	33	51.9	187858	1	1	1	563.625	1687.85	3	1687.85	-0.0016	0	35.01	22	27	0.0092	K	MNEVDEESK	Q			File845 Spectrum426829 scans: 6970	27023.1	14955.4	29576.3	30218.9	33053	31727.8	39355.6	19967.5
9	Pavir.J01685.1	Pavir.J01685.1	12930	89351	586	586	33	33	51.9	242944	1	1	1	943.501	1884.99	2	1884.99	-0.0014	0	52.22	18	29	0.00027	K	AVITVPAYFNDSQR	T	Deamidated (NQ)	0.00000000010000.0	File845 Spectrum436711 scans: 17510	25931.9	28011.8	32628.3	28697.6	42810.8	46717.1	36910.9	27815.5
9	Pavir.J01685.1	Pavir.J01685.1	12930	89351	586	586	33	33	51.9	444706	1	1	1	906.742	3622.94	4	3622.95	-0.0056	0	43.64	17	31	0.003	K	VVGIDLGTTNSAVAAMEGGKPTIVTNAEGAR	T	Oxidation (M)	0.0000000000000003000000000000000.0	File846 Spectrum460235 scans: 16963	25870.4	18761	25087.3	18551.2	27133.1	28555	32636.8	22568.6
9	Pavir.J01685.1	Pavir.J01685.1	12930	89351	586	586	33	33	51.9	444401	1	1	1	1203.32	3606.95	3	3606.95	-0.0007	0	79.89		30	6.2e-07	K	VVGIDLGTTNSAVAAMEGGKPTIVTNAEGAR	T			File846 Spectrum464181 scans: 21172	25580.4	20052.7	25598.2	30568.6	32108.6	27884.6	33554.3	30752.9
9	Pavir.J01685.1	Pavir.J01685.1	12930	89351	586	586	33	33	51.9	444398	1	1	1	1203.32	3606.94	3	3606.95	-0.0058	0	49.37		30	0.00073	K	VVGIDLGTTNSAVAAMEGGKPTIVTNAEGAR	T			File846 Spectrum464017 scans: 20997	24812.5	25063.7	28651.1	27835.5	35449.3	41859.6	46215.3	36773.4
9	Pavir.J01685.1	Pavir.J01685.1	12930	89351	586	586	33	33	51.9	444439	1	1	1	902.99	3607.93	4	3607.93	-0.0035	0	58.93	16	31	8.8e-05	K	VVGIDLGTTNSAVAAMEGGKPTIVTNAEGAR	T	Deamidated (NQ)	0.0000000001000000000000000000000.0	File844 Spectrum416640 scans: 21388	24775.1	12148.7	29432.4	11447.2	19282.9	26134.4	22456.5	24059.7
9	Pavir.J01685.1	Pavir.J01685.1	12930	89351	586	586	33	33	51.9	207427	1	1	1	878.504	1754.99	2	1755	-0.0055	0	61.7	17	30	3.5e-05	K	DAVAGGSTQTIK	D			File833 Spectrum147259 scans: 6562	24056.8	15295.3	15560.9	19796.1	18496.7	13555.6	22337.2	20707.5
9	Pavir.J01685.1	Pavir.J01685.1	12930	89351	586	586	33	33	51.9	444438	1	1	1	902.99	3607.93	4	3607.93	-0.0037	0	66.12	19	31	1.7e-05	K	VVGIDLGTTNSAVAAMEGGKPTIVTNAEGAR	T	Deamidated (NQ)	0.0000000000000000000000000100000.0	File845 Spectrum440838 scans: 21913	23570.2	32579.3	20205.6	23988.5	32798.3	27310.2	31786.2	27725.8
9	Pavir.J01685.1	Pavir.J01685.1	12930	89351	586	586	33	33	51.9	242917	1	1	1	943.499	1884.98	2	1884.99	-0.0052	0	45.91	19	29	0.0011	K	AVITVPAYFNDSQR	T	Deamidated (NQ)	0.00000000010000.0	File846 Spectrum461226 scans: 18020	22983.6	18416.1	24748.9	23651.4	31405.2	29834.6	27541.3	21335.3
9	Pavir.J01685.1	Pavir.J01685.1	12930	89351	586	586	33	33	51.9	242627	1	1	1	943.01	1884.01	2	1884	0.0013	0	31.76		29	0.032	K	AVITVPAYFNDSQR	T			File827 Spectrum13809 scans: 17864	22503.3	19521.2	25370.3	24685.3	40055.9	39019.8	28244.8	24127
9	Pavir.J01685.1	Pavir.J01685.1	12930	89351	586	586	33	33	51.9	242916	1	1	1	943.499	1884.98	2	1884.99	-0.0054	0	48.86	17	29	0.00058	K	AVITVPAYFNDSQR	T	Deamidated (NQ)	0.00000000010000.0	File828 Spectrum38869 scans: 18276	22376.8	18454.7	23957.6	25045.7	35108.9	36593.4	28908.5	18936.1
9	Pavir.J01685.1	Pavir.J01685.1	12930	89351	586	586	33	33	51.9	444395	1	1	1	902.74	3606.93	4	3606.95	-0.0183	0	41.41		31	0.0049	K	VVGIDLGTTNSAVAAMEGGKPTIVTNAEGAR	T			File845 Spectrum440750 scans: 21819	21891.2	18916.6	17067.7	21780.1	18240.6	19294.3	21704.9	17781.3
9	Pavir.J01685.1	Pavir.J01685.1	12930	89351	586	586	33	33	51.9	444713	1	1	1	906.981	3623.9	4	3623.93	-0.0335	0	66.79	20	31	1.7e-05	K	VVGIDLGTTNSAVAAMEGGKPTIVTNAEGAR	T	Deamidated (NQ); Oxidation (M)	0.0000000001000003000000000000000.0	File840 Spectrum318511 scans: 16324	21338.3	20364.3	19462.6	20669.3	15362.3	17808.2	15743.4	15269.9
9	Pavir.J01685.1	Pavir.J01685.1	12930	89351	586	586	33	33	51.9	242922	1	1	1	943.5	1884.98	2	1884.99	-0.0045	0	52.99	18	29	0.00022	K	AVITVPAYFNDSQR	T	Deamidated (NQ)	0.00000000010000.0	File846 Spectrum461050 scans: 17832	21142	18560.8	24128.8	23884.9	31677.5	32614.6	29875	19720.9
9	Pavir.J01685.1	Pavir.J01685.1	12930	89351	586	586	33	33	51.9	242932	1	1	1	943.5	1884.99	2	1884.99	-0.0027	0	38.97	19	29	0.0056	K	AVITVPAYFNDSQR	T	Deamidated (NQ)	0.00000000010000.0	File844 Spectrum413360 scans: 17889	20436	16574.9	21918.1	21310.2	28614.3	29283	25294.4	18039.2
9	Pavir.J01685.1	Pavir.J01685.1	12930	89351	586	586	33	33	51.9	207420	1	1	1	586.005	1754.99	3	1755	-0.0063	0	48.13	16	30	0.00081	K	DAVAGGSTQTIK	D			File833 Spectrum147327 scans: 6635	20247.6	20726.9	17800.9	19684.5	19057.8	18519.7	27986.6	27860.4
9	Pavir.J01685.1	Pavir.J01685.1	12930	89351	586	586	33	33	51.9	444434	1	1	1	902.99	3607.93	4	3607.93	-0.0047	0	56.48	18	31	0.00016	K	VVGIDLGTTNSAVAAMEGGKPTIVTNAEGAR	T	Deamidated (NQ)	0.0000000001000000000000000000000.0	File844 Spectrum415102 scans: 19747	19763.8	19664.1	16693.8	17896.1	26062.7	23538.5	30377.3	16009.9
9	Pavir.J01685.1	Pavir.J01685.1	12930	89351	586	586	33	33	51.9	444728	1	1	1	906.988	3623.92	4	3623.93	-0.0059	0	52.05	24	31	0.00045	K	VVGIDLGTTNSAVAAMEGGKPTIVTNAEGAR	T	Deamidated (NQ); Oxidation (M)	0.0000000001000003000000000000000.0	File841 Spectrum342430 scans: 16914	18874.7	12179	16008.6	22184.8	14898	16768.9	16887.3	18767.9
9	Pavir.J01685.1	Pavir.J01685.1	12930	89351	586	586	33	33	51.9	444718	1	1	1	906.987	3623.92	4	3623.93	-0.0099	0	40.07	22	31	0.0073	K	VVGIDLGTTNSAVAAMEGGKPTIVTNAEGAR	T	Deamidated (NQ); Oxidation (M)	0.0000000000000003000000000100000.0	File842 Spectrum365942 scans: 17462	18494.4	15216.8	20797.8	17423.9	20206.5	17891.7	16328.4	16873.2
9	Pavir.J01685.1	Pavir.J01685.1	12930	89351	586	586	33	33	51.9	444476	1	1	1	903.235	3608.91	4	3608.92	-0.008	0	46.18		31	0.0017	K	VVGIDLGTTNSAVAAMEGGKPTIVTNAEGAR	T	2 Deamidated (NQ)	0.0000000001000000000000000100000.0	File842 Spectrum369086 scans: 20816	18316.7	16726.6	17167.7	16537.5	15555.5	15173.9	26689.3	17445
9	Pavir.J01685.1	Pavir.J01685.1	12930	89351	586	586	33	33	51.9	444427	1	1	1	902.989	3607.92	4	3607.93	-0.0093	0	36.81	15	31	0.015	K	VVGIDLGTTNSAVAAMEGGKPTIVTNAEGAR	T	Deamidated (NQ)	0.0000000001000000000000000000000.0	File844 Spectrum416571 scans: 21314	18184.1	13847.7	16397.8	20635.9	22269.2	23499	20082.3	17523.4
9	Pavir.J01685.1	Pavir.J01685.1	12930	89351	586	586	33	33	51.9	444487	2	1	1	903.24	3608.93	4	3608.92	0.0128	0	47.08		31	0.0013	K	VVGIDLGTTNSAVAAMEGGKPTIVTNAEGAR	T	2 Deamidated (NQ)	0.0000000001000000000000000100000.0	File843 Spectrum387866 scans: 15686	17887.6	11700.6	15540.1	19023.7	15894.4	14909.1	16414.6	17332.8
9	Pavir.J01685.1	Pavir.J01685.1	12930	89351	586	586	33	33	51.9	444425	1	1	1	902.985	3607.91	4	3607.93	-0.0249	0	35.54		31	0.021	K	VVGIDLGTTNSAVAAMEGGKPTIVTNAEGAR	T	Deamidated (NQ)	0.0000000001000000000000000000000.0	File842 Spectrum368988 scans: 20711	17659.8	12391.2	13764.6	12832.5	15424.5	16464.7	16635.8	15516.6
9	Pavir.J01685.1	Pavir.J01685.1	12930	89351	586	586	33	33	51.9	444756	1	1	1	907.236	3624.91	4	3624.91	-0.0002	0	61.62	19	31	5e-05	K	VVGIDLGTTNSAVAAMEGGKPTIVTNAEGAR	T	2 Deamidated (NQ); Oxidation (M)	0.0000000001000003000000000100000.0	File840 Spectrum318501 scans: 16313	17657	14494.7	17221.5	13622.2	11702.5	15093.1	14656.9	13980.6
9	Pavir.J01685.1	Pavir.J01685.1	12930	89351	586	586	33	33	51.9	242957	1	1	1	943.501	1884.99	2	1884.99	-0.0006	0	55.78	21	29	0.00012	K	AVITVPAYFNDSQR	T	Deamidated (NQ)	0.00000000010000.0	File845 Spectrum437054 scans: 17876	17453.4	10717.9	16001.1	14638.2	25771.2	25518.7	20833	13498.5
9	Pavir.J01685.1	Pavir.J01685.1	12930	89351	586	586	33	33	51.9	444475	1	1	1	903.235	3608.91	4	3608.92	-0.0082	0	49.93		31	0.00073	K	VVGIDLGTTNSAVAAMEGGKPTIVTNAEGAR	T	2 Deamidated (NQ)	0.0000000001000000000000000100000.0	File842 Spectrum368051 scans: 19712	17332.8	9201.15	13120.3	17759.1	19220.4	16248.1	19201	17938.3
9	Pavir.J01685.1	Pavir.J01685.1	12930	89351	586	586	33	33	51.9	242952	1	1	1	943.501	1884.99	2	1884.99	-0.0009	0	36.61		29	0.0096	K	AVITVPAYFNDSQR	T	Deamidated (NQ)	0.00000000000010.0	File828 Spectrum39386 scans: 18827	17321.7	20286.9	11053.3	9797.32	13355.5	13523.2	11889	22557.4
9	Pavir.J01685.1	Pavir.J01685.1	12930	89351	586	586	33	33	51.9	242604	1	1	1	629.008	1884	3	1884	-0.0036	0	32.4		29	0.026	K	AVITVPAYFNDSQR	T			File828 Spectrum38163 scans: 17523	17129.9	16720.3	17983.4	16841.8	15171.6	15573.8	11073.2	15785.7
9	Pavir.J01685.1	Pavir.J01685.1	12930	89351	586	586	33	33	51.9	101319	1	1	1	715.392	1428.77	2	1428.77	-0.0041	0	31.44		28	0.025	R	MVNEAEK	F	Deamidated (NQ)	0.0010000.0	File828 Spectrum27230 scans: 5860	17040.5	11783.7	20789.2	18197.8	29443	25901.3	23893.8	17344
9	Pavir.J01685.1	Pavir.J01685.1	12930	89351	586	586	33	33	51.9	187856	1	1	1	844.933	1687.85	2	1687.85	-0.0026	0	36.12	17	27	0.0068	K	MNEVDEESK	Q			File846 Spectrum451130 scans: 7251	16753.8	12585.7	17344.2	14842.3	27061.2	24447.9	22124.1	15707.2
9	Pavir.J01685.1	Pavir.J01685.1	12930	89351	586	586	33	33	51.9	444702	1	1	1	906.741	3622.94	4	3622.95	-0.008	0	46.95	18	31	0.0014	K	VVGIDLGTTNSAVAAMEGGKPTIVTNAEGAR	T	Oxidation (M)	0.0000000000000003000000000000000.0	File843 Spectrum388722 scans: 16599	16540	18729.8	14444.3	21804.6	17129.5	19828.4	21966.4	16424.7
9	Pavir.J01685.1	Pavir.J01685.1	12930	89351	586	586	33	33	51.9	187861	1	1	1	844.934	1687.85	2	1687.85	-0.0011	0	43.07	24	27	0.0014	K	MNEVDEESK	Q			File846 Spectrum451101 scans: 7220	16299	13276.6	21831.3	19555	30053.5	29048.8	26886.3	18476.4
9	Pavir.J01685.1	Pavir.J01685.1	12930	89351	586	586	33	33	51.9	187854	1	1	1	844.932	1687.85	2	1687.85	-0.0048	0	49.72	19	27	0.00029	K	MNEVDEESK	Q			File845 Spectrum426744 scans: 6879	16202.5	12693.2	18588.5	17431.3	27021.2	27052	23268.9	15359.6
9	Pavir.J01685.1	Pavir.J01685.1	12930	89351	586	586	33	33	51.9	242938	1	1	1	943.5	1884.99	2	1884.99	-0.0023	0	46.86	20	29	0.00094	K	AVITVPAYFNDSQR	T	Deamidated (NQ)	0.00000000000010.0	File844 Spectrum413483 scans: 18020	15967.4	13381.3	21064.5	16241.2	24302.9	27598.2	20598.8	13139.8
9	Pavir.J01685.1	Pavir.J01685.1	12930	89351	586	586	33	33	51.9	444446	1	1	1	902.991	3607.93	4	3607.93	0.0005	0	39.4	16	31	0.0078	K	VVGIDLGTTNSAVAAMEGGKPTIVTNAEGAR	T	Deamidated (NQ)	0.0000000001000000000000000000000.0	File843 Spectrum391708 scans: 19784	15691.4	12594	15067.6	16586.1	16799.9	11212.8	12711.1	16368.7
9	Pavir.J01685.1	Pavir.J01685.1	12930	89351	586	586	33	33	51.9	444431	1	1	1	902.989	3607.93	4	3607.93	-0.0059	0	36.3	15	31	0.016	K	VVGIDLGTTNSAVAAMEGGKPTIVTNAEGAR	T	Deamidated (NQ)	0.0000000000000000000000000100000.0	File844 Spectrum415952 scans: 20654	15360.9	17697.3	17942.4	24775.9	14948.5	16358.4	21937.1	17938.3
9	Pavir.J01685.1	Pavir.J01685.1	12930	89351	586	586	33	33	51.9	444436	1	1	1	1203.65	3607.93	3	3607.93	-0.004	0	53.62	23	31	0.0003	K	VVGIDLGTTNSAVAAMEGGKPTIVTNAEGAR	T	Deamidated (NQ)	0.0000000000000000000000000100000.0	File844 Spectrum415836 scans: 20530	15233	13457.2	21770.8	16550.6	23183.5	16415.8	23020.7	17859.8
9	Pavir.J01685.1	Pavir.J01685.1	12930	89351	586	586	33	33	51.9	242950	1	1	1	629.337	1884.99	3	1884.99	-0.001	0	31.42		29	0.032	K	AVITVPAYFNDSQR	T	Deamidated (NQ)	0.00000000010000.0	File844 Spectrum413475 scans: 18012	15088.8	15681.7	12366.9	20242.1	17059.3	23576.8	18532.1	20797.2
9	Pavir.J01685.1	Pavir.J01685.1	12930	89351	586	586	33	33	51.9	242581	1	1	1	943.006	1884	2	1884	-0.0079	0	38.8	22	29	0.0058	K	AVITVPAYFNDSQR	T			File828 Spectrum38828 scans: 18232	15065.7	15783.5	16647.5	16263.7	24465.1	25335.7	20438.9	16323.8
9	Pavir.J01685.1	Pavir.J01685.1	12930	89351	586	586	33	33	51.9	242956	1	1	1	629.337	1884.99	3	1884.99	-0.0006	0	50.04	16	29	0.00044	K	AVITVPAYFNDSQR	T	Deamidated (NQ)	0.00000000010000.0	File845 Spectrum437357 scans: 18200	14687.7	11339.8	15220.4	14445.7	16503.4	12557.7	10032.4	10357.1
9	Pavir.J01685.1	Pavir.J01685.1	12930	89351	586	586	33	33	51.9	242617	1	1	1	943.01	1884	2	1884	-0.0003	0	62.16	26	29	2.7e-05	K	AVITVPAYFNDSQR	T			File829 Spectrum63138 scans: 18061	14463.8	14264	17977.2	18557	28670.3	23276	24241.4	13633.1
9	Pavir.J01685.1	Pavir.J01685.1	12930	89351	586	586	33	33	51.9	242915	1	1	1	629.335	1884.98	3	1884.99	-0.0061	0	42.42	16	29	0.0025	K	AVITVPAYFNDSQR	T	Deamidated (NQ)	0.00000000010000.0	File828 Spectrum38865 scans: 18272	14312.8	20819.6	21386.7	19119.6	25261.4	30421.2	25171.6	23185.2
9	Pavir.J01685.1	Pavir.J01685.1	12930	89351	586	586	33	33	51.9	444473	1	1	1	903.235	3608.91	4	3608.92	-0.0085	0	48.6		31	0.00099	K	VVGIDLGTTNSAVAAMEGGKPTIVTNAEGAR	T	2 Deamidated (NQ)	0.0000000001000000000000000100000.0	File842 Spectrum369595 scans: 21359	14285.4	9308.06	11756.2	13241.6	14065.7	10979.9	15827.5	9520.73
9	Pavir.J01685.1	Pavir.J01685.1	12930	89351	586	586	33	33	51.9	187863	1	1	1	563.625	1687.85	3	1687.85	-0.0007	0	36.56	24	27	0.0063	K	MNEVDEESK	Q			File845 Spectrum426708 scans: 6841	14028.8	12926.3	17188.7	17529.3	22596.9	29641.1	19600.6	15090.6
9	Pavir.J01685.1	Pavir.J01685.1	12930	89351	586	586	33	33	51.9	242634	1	1	1	943.011	1884.01	2	1884	0.003	0	38.47	24	29	0.0067	K	AVITVPAYFNDSQR	T			File827 Spectrum13945 scans: 18009	13591.3	12260.5	14808.6	11463.7	18792	19331.1	13551.2	12792.2
9	Pavir.J01685.1	Pavir.J01685.1	12930	89351	586	586	33	33	51.9	242942	1	1	1	629.336	1884.99	3	1884.99	-0.0016	0	50.11	16	29	0.00044	K	AVITVPAYFNDSQR	T	Deamidated (NQ)	0.00000000010000.0	File844 Spectrum413415 scans: 17948	13493.4	13460.2	9129.64	15906	12893.8	16561	13867	11547.8
9	Pavir.J01685.1	Pavir.J01685.1	12930	89351	586	586	33	33	51.9	242928	1	1	1	943.5	1884.99	2	1884.99	-0.0035	0	54.22		29	0.00017	K	AVITVPAYFNDSQR	T	Deamidated (NQ)	0.00000000010000.0	File828 Spectrum39294 scans: 18729	13478.4	13614	15164.8	13466.4	20460.3	21954.6	18052.9	12063.5
9	Pavir.J01685.1	Pavir.J01685.1	12930	89351	586	586	33	33	51.9	444734	1	1	1	906.989	3623.93	4	3623.93	-0.0011	0	41.6	22	31	0.0049	K	VVGIDLGTTNSAVAAMEGGKPTIVTNAEGAR	T	Deamidated (NQ); Oxidation (M)	0.0000000000000003000000000100000.0	File842 Spectrum366037 scans: 17563	13207.8	13215.1	9604.24	11456.9	16405.1	14445.5	9500.66	12276.5
9	Pavir.J01685.1	Pavir.J01685.1	12930	89351	586	586	33	33	51.9	444448	1	1	1	902.991	3607.94	4	3607.93	0.0019	0	52.62	17	31	0.00037	K	VVGIDLGTTNSAVAAMEGGKPTIVTNAEGAR	T	Deamidated (NQ)	0.0000000001000000000000000000000.0	File844 Spectrum416703 scans: 21455	13115.2	10045.2	13128.1	7280.39	11966.3	13798.9	15547.2	12399.8
9	Pavir.J01685.1	Pavir.J01685.1	12930	89351	586	586	33	33	51.9	444739	1	1	1	906.99	3623.93	4	3623.93	0.0041	0	58.49	17	31	9.9e-05	K	VVGIDLGTTNSAVAAMEGGKPTIVTNAEGAR	T	Deamidated (NQ); Oxidation (M)	0.0000000000000003000000000100000.0	File844 Spectrum411809 scans: 16234	12678.5	11562.5	8766.7	12729.7	13089.6	13712.7	12168.2	10247.2
9	Pavir.J01685.1	Pavir.J01685.1	12930	89351	586	586	33	33	51.9	444726	1	1	1	906.988	3623.92	4	3623.93	-0.0064	0	61.79	17	31	4.8e-05	K	VVGIDLGTTNSAVAAMEGGKPTIVTNAEGAR	T	Deamidated (NQ); Oxidation (M)	0.0000000001000003000000000000000.0	File842 Spectrum365710 scans: 17215	12577.1	13173.7	9007.25	11242	9555.57	11535.4	13185.2	6803.08
9	Pavir.J01685.1	Pavir.J01685.1	12930	89351	586	586	33	33	51.9	242612	1	1	1	943.009	1884	2	1884	-0.0009	0	51.32	25	29	0.00033	K	AVITVPAYFNDSQR	T			File829 Spectrum63168 scans: 18093	12419.2	11636.2	13954.1	11379.9	17890.4	20081.5	15286.4	12018.6
9	Pavir.J01685.1	Pavir.J01685.1	12930	89351	586	586	33	33	51.9	444708	1	1	1	906.745	3622.95	4	3622.95	0.0049	0	43.35	19	31	0.003	K	VVGIDLGTTNSAVAAMEGGKPTIVTNAEGAR	T	Oxidation (M)	0.0000000000000003000000000000000.0	File843 Spectrum388784 scans: 16665	12366.6	8508.25	13052.5	8724.68	12313.1	7591.93	9783.25	8151.82
9	Pavir.J01685.1	Pavir.J01685.1	12930	89351	586	586	33	33	51.9	242608	1	1	1	629.008	1884	3	1884	-0.0023	0	45.15	20	29	0.0014	K	AVITVPAYFNDSQR	T			File829 Spectrum63161 scans: 18086	12075.4	15632	10824.9	4756.96	12400.9	11717.3	9458.35	6719
9	Pavir.J01685.1	Pavir.J01685.1	12930	89351	586	586	33	33	51.9	242933	1	1	1	943.5	1884.99	2	1884.99	-0.0026	0	66.47	19	29	9.9e-06	K	AVITVPAYFNDSQR	T	Deamidated (NQ)	0.00000000010000.0	File845 Spectrum437068 scans: 17891	11863	12429.3	14161	13948.5	19359.1	20136.8	13593.3	11379.6
9	Pavir.J01685.1	Pavir.J01685.1	12930	89351	586	586	33	33	51.9	444478	1	1	1	1203.98	3608.91	3	3608.92	-0.0058	0	51.82		31	0.00046	K	VVGIDLGTTNSAVAAMEGGKPTIVTNAEGAR	T	2 Deamidated (NQ)	0.0000000001000000000000000100000.0	File842 Spectrum367982 scans: 19638	11641.8	11626.8	11339.3	13866.2	11193.5	13652.3	13047.5	10997.3
9	Pavir.J01685.1	Pavir.J01685.1	12930	89351	586	586	33	33	51.9	242918	1	1	1	943.499	1884.98	2	1884.99	-0.0051	0	58.02		29	6.8e-05	K	AVITVPAYFNDSQR	T	Deamidated (NQ)	0.00000000000010.0	File844 Spectrum413514 scans: 18053	11588.2	10016	13904	13371.1	18751.5	15909.2	15832.1	10808.9
9	Pavir.J01685.1	Pavir.J01685.1	12930	89351	586	586	33	33	51.9	444737	1	1	1	906.99	3623.93	4	3623.93	0.0016	0	51.64	22	31	0.00048	K	VVGIDLGTTNSAVAAMEGGKPTIVTNAEGAR	T	Deamidated (NQ); Oxidation (M)	0.0000000000000003000000000100000.0	File844 Spectrum411779 scans: 16202	11518.7	10311.5	10760.2	13021.2	10910.7	11207	10364.3	12220.4
9	Pavir.J01685.1	Pavir.J01685.1	12930	89351	586	586	33	33	51.9	187855	1	1	1	844.932	1687.85	2	1687.85	-0.0045	0	43.54	23	27	0.0012	K	MNEVDEESK	Q			File846 Spectrum451080 scans: 7197	11493.8	10016	15035	14844	20511.5	20605.1	18025.5	12332.5
9	Pavir.J01685.1	Pavir.J01685.1	12930	89351	586	586	33	33	51.9	444721	1	1	1	906.987	3623.92	4	3623.93	-0.0081	0	43.05	23	31	0.0036	K	VVGIDLGTTNSAVAAMEGGKPTIVTNAEGAR	T	Deamidated (NQ); Oxidation (M)	0.0000000000000003000000000100000.0	File842 Spectrum364861 scans: 16309	11425.7	9855.97	11758.7	7075.7	8515.24	8455.93	10567.3	7962.34
9	Pavir.J01685.1	Pavir.J01685.1	12930	89351	586	586	33	33	51.9	444755	1	1	1	907.235	3624.91	4	3624.91	-0.0019	0	47.37	26	31	0.0013	K	VVGIDLGTTNSAVAAMEGGKPTIVTNAEGAR	T	2 Deamidated (NQ); Oxidation (M)	0.0000000001000003000000000100000.0	File840 Spectrum318581 scans: 16399	11284.6	5945.56	10833	9349.79	10099	9543.76	6715.57	7143.91
9	Pavir.J01685.1	Pavir.J01685.1	12930	89351	586	586	33	33	51.9	444740	1	1	1	906.991	3623.94	4	3623.93	0.0067	0	38.3	16	31	0.01	K	VVGIDLGTTNSAVAAMEGGKPTIVTNAEGAR	T	Deamidated (NQ); Oxidation (M)	0.0000000000000003000000000100000.0	File844 Spectrum411839 scans: 16266	11203.9	9554	9562.18	14070.1	12436.8	13553.1	12223.1	12108.3
9	Pavir.J01685.1	Pavir.J01685.1	12930	89351	586	586	33	33	51.9	242607	1	1	1	943.009	1884	2	1884	-0.0023	0	49.15		29	0.00057	K	AVITVPAYFNDSQR	T			File829 Spectrum63125 scans: 18047	11106.2	12857	15992.9	12963.9	20555.6	20209.3	18179.2	12646.5
9	Pavir.J01685.1	Pavir.J01685.1	12930	89351	586	586	33	33	51.9	242963	1	1	1	943.502	1884.99	2	1884.99	0.0009	0	67.32	24	29	8.8e-06	K	AVITVPAYFNDSQR	T	Deamidated (NQ)	0.00000000010000.0	File846 Spectrum461251 scans: 18046	10818.9	9244.96	12413.7	10832.3	17233.4	17063.9	13277.4	11245
9	Pavir.J01685.1	Pavir.J01685.1	12930	89351	586	586	33	33	51.9	242618	1	1	1	943.01	1884	2	1884	-0.0002	0	42.78	27	29	0.0024	K	AVITVPAYFNDSQR	T			File829 Spectrum63156 scans: 18080	10631.6	10033.6	14699.1	10284.6	18582.3	18981.7	14899.4	11828
9	Pavir.J01685.1	Pavir.J01685.1	12930	89351	586	586	33	33	51.9	444440	1	1	1	902.99	3607.93	4	3607.93	-0.003	0	34.31	21	31	0.025	K	VVGIDLGTTNSAVAAMEGGKPTIVTNAEGAR	T	Deamidated (NQ)	0.0000000000000000000000000100000.0	File845 Spectrum439850 scans: 20859	10199	10292.4	9391.64	9326.26	9260.83	11514.2	11916.3	8415.28
9	Pavir.J01685.1	Pavir.J01685.1	12930	89351	586	586	33	33	51.9	444722	1	1	1	906.988	3623.92	4	3623.93	-0.0079	0	50.52	23	31	0.00065	K	VVGIDLGTTNSAVAAMEGGKPTIVTNAEGAR	T	Deamidated (NQ); Oxidation (M)	0.0000000000000003000000000100000.0	File842 Spectrum364873 scans: 16322	10029	12090.3	8326.29	6387.31	6823.17	6424.77	7670.03	7368.14
9	Pavir.J01685.1	Pavir.J01685.1	12930	89351	586	586	33	33	51.9	444757	1	1	1	907.236	3624.91	4	3624.91	0.0012	0	51.96	19	31	0.00046	K	VVGIDLGTTNSAVAAMEGGKPTIVTNAEGAR	T	2 Deamidated (NQ); Oxidation (M)	0.0000000001000003000000000100000.0	File840 Spectrum320015 scans: 17928	9734.87	8802.2	8372.56	9239.74	8212.04	6415.1	7186.41	8731.45
9	Pavir.J01685.1	Pavir.J01685.1	12930	89351	586	586	33	33	51.9	444469	1	1	1	903.234	3608.91	4	3608.92	-0.0129	0	42.37		31	0.0043	K	VVGIDLGTTNSAVAAMEGGKPTIVTNAEGAR	T	2 Deamidated (NQ)	0.0000000001000000000000000100000.0	File842 Spectrum368822 scans: 20534	9706.95	8351.77	10778.2	9872.74	11103.9	8611.4	10090.7	8346.89
9	Pavir.J01685.1	Pavir.J01685.1	12930	89351	586	586	33	33	51.9	444709	1	1	1	906.746	3622.96	4	3622.95	0.0108	0	48.44	18	30	0.0009	K	VVGIDLGTTNSAVAAMEGGKPTIVTNAEGAR	T	Oxidation (M)	0.0000000000000003000000000000000.0	File843 Spectrum388687 scans: 16561	9495.37	7245.29	10290	8217.3	9760.69	11180.1	11191.6	9876.13
9	Pavir.J01685.1	Pavir.J01685.1	12930	89351	586	586	33	33	51.9	444484	2	1	1	903.238	3608.92	4	3608.92	0.0059	0	41.4		31	0.0049	K	VVGIDLGTTNSAVAAMEGGKPTIVTNAEGAR	T	2 Deamidated (NQ)	0.0000000001000000000000000100000.0	File845 Spectrum435029 scans: 15716	9066.49	9102.59	8462.74	9054.7	7467.78	7120.91	6333.36	8178.72
9	Pavir.J01685.1	Pavir.J01685.1	12930	89351	586	586	33	33	51.9	444397	1	1	1	1203.32	3606.94	3	3606.95	-0.0113	0	57.24		31	0.00012	K	VVGIDLGTTNSAVAAMEGGKPTIVTNAEGAR	T			File846 Spectrum464212 scans: 21205	8912.21	10073	10349.4	8432.8	13822	10349.2	15255.1	12747.4
9	Pavir.J01685.1	Pavir.J01685.1	12930	89351	586	586	33	33	51.9	444753	1	1	1	907.234	3624.91	4	3624.91	-0.0063	0	48.97	18	31	0.00095	K	VVGIDLGTTNSAVAAMEGGKPTIVTNAEGAR	T	2 Deamidated (NQ); Oxidation (M)	0.0000000001000003000000000100000.0	File840 Spectrum318633 scans: 16454	8826.81	5366.99	9678.26	6809.18	7531.62	9314.9	6800.06	6758.24
9	Pavir.J01685.1	Pavir.J01685.1	12930	89351	586	586	33	33	51.9	444741	1	1	1	906.992	3623.94	4	3623.93	0.0102	0	56.38	23	31	0.00015	K	VVGIDLGTTNSAVAAMEGGKPTIVTNAEGAR	T	Deamidated (NQ); Oxidation (M)	0.0000000000000003000000000100000.0	File844 Spectrum411864 scans: 16293	8706.73	6973.67	8191.54	12464.8	10444.4	9821.36	8295.37	8723.6
9	Pavir.J01685.1	Pavir.J01685.1	12930	89351	586	586	33	33	51.9	444714	1	1	1	906.985	3623.91	4	3623.93	-0.0201	0	42.98	18	31	0.0038	K	VVGIDLGTTNSAVAAMEGGKPTIVTNAEGAR	T	Deamidated (NQ); Oxidation (M)	0.0000000001000003000000000000000.0	File842 Spectrum365645 scans: 17145	8560.44	9119.02	3885.97	6261.09	5047.01	5577.19	5788.46	8092.39
9	Pavir.J01685.1	Pavir.J01685.1	12930	89351	586	586	33	33	51.9	207410	1	1	1	586.004	1754.99	3	1755	-0.0084	0	33.26		30	0.025	K	DAVAGGSTQTIK	D			File833 Spectrum146646 scans: 5908	8503.48	13290.1	7861.16	9138.43	7638.16	7395.6	9118.37	9621.63
9	Pavir.J01685.1	Pavir.J01685.1	12930	89351	586	586	33	33	51.9	444705	1	1	1	906.742	3622.94	4	3622.95	-0.0058	0	42.35	18	31	0.004	K	VVGIDLGTTNSAVAAMEGGKPTIVTNAEGAR	T	Oxidation (M)	0.0000000000000003000000000000000.0	File844 Spectrum412123 scans: 16569	8433.33	7854.85	5552.25	10515.4	8788.64	7461.49	5157.07	6884.93
9	Pavir.J01685.1	Pavir.J01685.1	12930	89351	586	586	33	33	51.9	444480	1	1	1	903.236	3608.91	4	3608.92	-0.0034	0	66.41		31	1.6e-05	K	VVGIDLGTTNSAVAAMEGGKPTIVTNAEGAR	T	2 Deamidated (NQ)	0.0000000001000000000000000100000.0	File842 Spectrum369674 scans: 21443	8403.96	11201.7	9846.29	11697.5	10226.1	9779.09	11019.4	12825.9
9	Pavir.J01685.1	Pavir.J01685.1	12930	89351	586	586	33	33	51.9	242962	1	1	1	943.502	1884.99	2	1884.99	0.0001	0	55.67	20	29	0.00013	K	AVITVPAYFNDSQR	T	Deamidated (NQ)	0.00000000010000.0	File845 Spectrum437399 scans: 18244	7867.89	9097.05	9721.31	8865.54	12318.4	11199.1	9204.24	7725.78
9	Pavir.J01685.1	Pavir.J01685.1	12930	89351	586	586	33	33	51.9	444715	1	1	1	906.986	3623.92	4	3623.93	-0.0125	0	78.92	20	31	9.5e-07	K	VVGIDLGTTNSAVAAMEGGKPTIVTNAEGAR	T	Deamidated (NQ); Oxidation (M)	0.0000000001000003000000000000000.0	File842 Spectrum365662 scans: 17163	7390.76	8354.2	6097.64	8667.6	8306.21	9061.93	7923.58	6733.57
9	Pavir.J01685.1	Pavir.J01685.1	12930	89351	586	586	33	33	51.9	444455	1	1	1	902.996	3607.95	4	3607.93	0.0195	0	46.35	20	30	0.0014	K	VVGIDLGTTNSAVAAMEGGKPTIVTNAEGAR	T	Deamidated (NQ)	0.0000000001000000000000000000000.0	File846 Spectrum464686 scans: 21710	7152.28	7823.38	6772.15	6300.77	6842.19	5963.68	7147.44	6027.25
9	Pavir.J01685.1	Pavir.J01685.1	12930	89351	586	586	33	33	51.9	242605	1	1	1	629.008	1884	3	1884	-0.003	0	43.22	19	29	0.0023	K	AVITVPAYFNDSQR	T			File829 Spectrum63115 scans: 18037	6687.38	9594.42	5655.48	10249.2	12087.9	8148.62	6993.76	8749.38
9	Pavir.J01685.1	Pavir.J01685.1	12930	89351	586	586	33	33	51.9	444445	1	1	1	902.991	3607.93	4	3607.93	0.0005	0	42.93	17	31	0.0034	K	VVGIDLGTTNSAVAAMEGGKPTIVTNAEGAR	T	Deamidated (NQ)	0.0000000000000000000000000100000.0	File845 Spectrum440871 scans: 21948	6624.94	7870.15	6047.45	8138.78	10034.1	7163.98	11238.8	8937.74
9	Pavir.J01685.1	Pavir.J01685.1	12930	89351	586	586	33	33	51.9	444759	1	1	1	907.243	3624.94	4	3624.91	0.0298	0	41.38		31	0.0047	K	VVGIDLGTTNSAVAAMEGGKPTIVTNAEGAR	T	2 Deamidated (NQ); Oxidation (M)	0.0000000001000003000000000100000.0	File843 Spectrum388399 scans: 16254	6009.02	6076.45	6929.5	4832.42	6863.45	6245.18	5729.92	5818.72
9	Pavir.J01685.1	Pavir.J01685.1	12930	89351	586	586	33	33	51.9	192642	1	1	1	852.93	1703.84	2	1703.85	-0.0049	0	29.69	14	26	0.027	K	MNEVDEESK	Q	Oxidation (M)	0.300000000.0	File843 Spectrum377010 scans: 4101	5842.9	4050.14	5752.72	5447.03	8431.35	8020.38	6489.96	3996.87
9	Pavir.J01685.1	Pavir.J01685.1	12930	89351	586	586	33	33	51.9	444443	1	1	1	902.991	3607.93	4	3607.93	-0.0008	0	51.86		31	0.00044	K	VVGIDLGTTNSAVAAMEGGKPTIVTNAEGAR	T	Deamidated (NQ)	0.0000000000000000000000000100000.0	File844 Spectrum416772 scans: 21528	5836.16	5730.08	6822.88	6071.51	6021.45	6101.52	6654.27	5911.78
9	Pavir.J01685.1	Pavir.J01685.1	12930	89351	586	586	33	33	51.9	444735	1	1	1	906.99	3623.93	4	3623.93	0.0001	0	55.8	23	31	0.00019	K	VVGIDLGTTNSAVAAMEGGKPTIVTNAEGAR	T	Deamidated (NQ); Oxidation (M)	0.0000000001000003000000000000000.0	File841 Spectrum343234 scans: 17771	5399.3	4735.04	6303.25	9513.67	5155.9	4192.92	5399.07	6859.14
9	Pavir.J01685.1	Pavir.J01685.1	12930	89351	586	586	33	33	51.9	444727	1	1	1	906.988	3623.92	4	3623.93	-0.0059	0	37.3	19	31	0.014	K	VVGIDLGTTNSAVAAMEGGKPTIVTNAEGAR	T	Deamidated (NQ); Oxidation (M)	0.0000000001000003000000000000000.0	File842 Spectrum365121 scans: 16586	5275.43	6021.54	5212.93	6806.69	4452.42	4179.31	6186.75	6127.03
9	Pavir.J01685.1	Pavir.J01685.1	12930	89351	586	586	33	33	51.9	444758	1	1	1	907.236	3624.92	4	3624.91	0.0022	0	46.42	19	31	0.0016	K	VVGIDLGTTNSAVAAMEGGKPTIVTNAEGAR	T	2 Deamidated (NQ); Oxidation (M)	0.0000000001000003000000000100000.0	File840 Spectrum320103 scans: 18022	5228.15	7435.03	5699.1	8075.08	5841.04	7856.07	6725.05	4865.75
9	Pavir.J01685.1	Pavir.J01685.1	12930	89351	586	586	33	33	51.9	444451	1	1	1	902.992	3607.94	4	3607.93	0.0039	0	34.88	17	31	0.022	K	VVGIDLGTTNSAVAAMEGGKPTIVTNAEGAR	T	Deamidated (NQ)	0.0000000001000000000000000000000.0	File843 Spectrum391748 scans: 19826	5127.02	4871.6	8895.52	7734.94	10199.7	6450.23	9712.94	5138.19
9	Pavir.J01685.1	Pavir.J01685.1	12930	89351	586	586	33	33	51.9	192657	1	1	1	852.932	1703.85	2	1703.85	-0.0009	0	37.69		27	0.0043	K	MNEVDEESK	Q	Oxidation (M)	0.300000000.0	File843 Spectrum376955 scans: 4042	5116.51	3057.59	4226.06	4733.47	6376.58	6514.29	5578.22	3459.84
9	Pavir.J01685.1	Pavir.J01685.1	12930	89351	586	586	33	33	51.9	444733	1	1	1	906.989	3623.93	4	3623.93	-0.004	0	53.16	19	31	0.00035	K	VVGIDLGTTNSAVAAMEGGKPTIVTNAEGAR	T	Deamidated (NQ); Oxidation (M)	0.0000000001000003000000000000000.0	File841 Spectrum343277 scans: 17817	5058.28	6629.46	8112.21	9110.8	5190.74	7396	6491.43	6269.42
9	Pavir.J01685.1	Pavir.J01685.1	12930	89351	586	586	33	33	51.9	207619	1	1	1	586.331	1755.97	3	1755.98	-0.0111	0	46	17	29	0.0012	K	DAVAGGSTQTIK	D	Deamidated (NQ)	0.000000001000.0	File831 Spectrum100639 scans: 7040	5013.8	7104.48	3893.26	5325.74	4584.6	3991.05	4938.21	5186.4
9	Pavir.J01685.1	Pavir.J01685.1	12930	89351	586	586	33	33	51.9	242615	1	1	1	629.009	1884	3	1884	-0.0006	0	35.35	19	29	0.013	K	AVITVPAYFNDSQR	T			File828 Spectrum38072 scans: 17426	4794.78	6274.34	3406.92	2876.1	6518.86	3490.41	4029.74	2773.7
9	Pavir.J01685.1	Pavir.J01685.1	12930	89351	586	586	33	33	51.9	188211	1	1	1	563.952	1688.83	3	1688.84	-0.0047	0	39.16	20	27	0.003	K	MNEVDEESK	Q	Deamidated (NQ)	0.010000000.0	File843 Spectrum378390 scans: 5578	4700.38	5285.35	5395.59	5947.35	6170.65	8177.31	6085.22	6056.4
9	Pavir.J01685.1	Pavir.J01685.1	12930	89351	586	586	33	33	51.9	192646	1	1	1	568.956	1703.85	3	1703.85	-0.0041	0	41.01	24	26	0.002	K	MNEVDEESK	Q	Oxidation (M)	0.300000000.0	File845 Spectrum424188 scans: 4153	4638.52	3080.36	4041.3	4556.14	6763.86	5999.36	4621.88	3254.67
9	Pavir.J01685.1	Pavir.J01685.1	12930	89351	586	586	33	33	51.9	444435	1	1	1	902.99	3607.93	4	3607.93	-0.0044	0	45.92	16	31	0.0018	K	VVGIDLGTTNSAVAAMEGGKPTIVTNAEGAR	T	Deamidated (NQ)	0.0000000000000000000000000100000.0	File844 Spectrum416009 scans: 20714	4637.68	6144.74	7270.91	7157.85	5046.99	4659.7	4714.89	4734.58
9	Pavir.J01685.1	Pavir.J01685.1	12930	89351	586	586	33	33	51.9	444731	1	1	1	906.988	3623.92	4	3623.93	-0.0047	0	52	22	31	0.00046	K	VVGIDLGTTNSAVAAMEGGKPTIVTNAEGAR	T	Deamidated (NQ); Oxidation (M)	0.0000000001000003000000000000000.0	File841 Spectrum343338 scans: 17882	4472.4	4268.78	4974.77	6658.7	5724.87	3669.15	4217.22	5776.12
9	Pavir.J01685.1	Pavir.J01685.1	12930	89351	586	586	33	33	51.9	242629	1	1	1	629.009	1884.01	3	1884	0.0016	0	47.52	21	29	0.00083	K	AVITVPAYFNDSQR	T			File827 Spectrum13251 scans: 17269	4446.99	4392.01	3188.19	3408.98	3945.82	2666.7	3060.46	4213.25
9	Pavir.J01685.1	Pavir.J01685.1	12930	89351	586	586	33	33	51.9	192651	1	1	1	568.956	1703.85	3	1703.85	-0.0032	0	41.05	23	27	0.002	K	MNEVDEESK	Q	Oxidation (M)	0.300000000.0	File846 Spectrum448307 scans: 4240	4207.29	3114.31	4663.82	4999.23	5615.52	5876.46	5470.86	4251.37
9	Pavir.J01685.1	Pavir.J01685.1	12930	89351	586	586	33	33	51.9	444477	1	1	1	903.235	3608.91	4	3608.92	-0.0063	0	31.86		31	0.046	K	VVGIDLGTTNSAVAAMEGGKPTIVTNAEGAR	T	2 Deamidated (NQ)	0.0000000001000000000000000100000.0	File842 Spectrum368872 scans: 20587	4180.94	6259.97	6675.79	6085.42	6540.43	6981.96	6130.55	6964.53
9	Pavir.J01685.1	Pavir.J01685.1	12930	89351	586	586	33	33	51.9	192899	1	1	1	569.284	1704.83	3	1704.83	-0.0037	0	38.55		26	0.0028	K	MNEVDEESK	Q	Deamidated (NQ); Oxidation (M)	0.310000000.0	File842 Spectrum353230 scans: 3798	4168.45	2729.16	3161.48	3660.43	5528.63	5135.02	3801.3	2910.48
9	Pavir.J01685.1	Pavir.J01685.1	12930	89351	586	586	33	33	51.9	242937	1	1	1	629.336	1884.99	3	1884.99	-0.0025	0	34.15		29	0.017	K	AVITVPAYFNDSQR	T	Deamidated (NQ)	0.00000000010000.0	File845 Spectrum437128 scans: 17955	3923.1	8047.37	5374.66	4107.75	5878.62	7413.23	5289.74	4407.2
9	Pavir.J01685.1	Pavir.J01685.1	12930	89351	586	586	33	33	51.9	242613	1	1	1	629.009	1884	3	1884	-0.0008	0	37.56	17	29	0.0078	K	AVITVPAYFNDSQR	T			File827 Spectrum13264 scans: 17283	3877.44	5485.94	5020.79	3153.35	4092.62	2958.96	3009.04	3598.86
9	Pavir.J01685.1	Pavir.J01685.1	12930	89351	586	586	33	33	51.9	242611	1	1	1	629.009	1884	3	1884	-0.001	0	49.32	18	29	0.00052	K	AVITVPAYFNDSQR	T			File827 Spectrum13244 scans: 17261	3835.11	5197.14	3595.44	2849.65	3364.14	3156.38	2077.37	2752.4
9	Pavir.J01685.1	Pavir.J01685.1	12930	89351	586	586	33	33	51.9	207414	1	1	1	586.005	1754.99	3	1755	-0.0071	0	42.69		30	0.0028	K	DAVAGGSTQTIK	D			File833 Spectrum147440 scans: 6755	3794.08	7895.38	4993.73	5188	4004.76	4091.23	4040.78	5940.93
9	Pavir.J01685.1	Pavir.J01685.1	12930	89351	586	586	33	33	51.9	242600	1	1	1	629.008	1884	3	1884	-0.0039	0	31.52	18	29	0.032	K	AVITVPAYFNDSQR	T			File829 Spectrum63027 scans: 17943	3783.92	6746.25	4296.84	3896.68	3352.77	3761.03	4137.17	4994.68
9	Pavir.J01685.1	Pavir.J01685.1	12930	89351	586	586	33	33	51.9	444707	1	1	1	1208.65	3622.94	3	3622.95	-0.0043	0	45.9	20	31	0.0018	K	VVGIDLGTTNSAVAAMEGGKPTIVTNAEGAR	T	Oxidation (M)	0.0000000000000003000000000000000.0	File846 Spectrum460260 scans: 16989	3748.32	3682.85	4249.36	4639.23	5135.26	5075.33	4281.96	5014.86
9	Pavir.J01685.1	Pavir.J01685.1	12930	89351	586	586	33	33	51.9	192641	1	1	1	568.956	1703.84	3	1703.85	-0.005	0	36.5	24	27	0.0057	K	MNEVDEESK	Q	Oxidation (M)	0.300000000.0	File845 Spectrum424232 scans: 4200	3706.67	3913.71	4705.22	4787.43	7543.84	7735.81	6001.21	4113.47
9	Pavir.J01685.1	Pavir.J01685.1	12930	89351	586	586	33	33	51.9	242632	1	1	1	629.01	1884.01	3	1884	0.0025	0	34.49	16	29	0.017	K	AVITVPAYFNDSQR	T			File827 Spectrum13214 scans: 17229	3697.17	5288.66	4621.95	4894.09	4519.16	3727.56	3287.3	2852.18
9	Pavir.J01685.1	Pavir.J01685.1	12930	89351	586	586	33	33	51.9	188214	1	1	1	845.428	1688.84	2	1688.84	0.0019	0	30.22		27	0.027	K	MNEVDEESK	Q	Deamidated (NQ)	0.010000000.0	File843 Spectrum378443 scans: 5634	3429.65	2133.03	3253.63	3311.62	4959.58	4995.31	4100.5	2925.06
9	Pavir.J01685.1	Pavir.J01685.1	12930	89351	586	586	33	33	51.9	192638	1	1	1	568.955	1703.84	3	1703.85	-0.0065	0	41.42	23	26	0.0017	K	MNEVDEESK	Q	Oxidation (M)	0.300000000.0	File846 Spectrum448235 scans: 4163	3411.06	4648.51	4797.96	4392.45	6784.76	6256.94	6218.7	4052.92
9	Pavir.J01685.1	Pavir.J01685.1	12930	89351	586	586	33	33	51.9	242620	1	1	1	629.009	1884	3	1884	0.0001	0	35.71	17	29	0.013	K	AVITVPAYFNDSQR	T			File827 Spectrum13225 scans: 17241	3155.62	4532.46	3594.1	4346.16	4872.51	3387.81	2970.23	5397.17
9	Pavir.J01685.1	Pavir.J01685.1	12930	89351	586	586	33	33	51.9	444482	1	1	1	903.238	3608.92	4	3608.92	0.0037	0	42.52		31	0.0038	K	VVGIDLGTTNSAVAAMEGGKPTIVTNAEGAR	T	2 Deamidated (NQ)	0.0000000001000000000000000100000.0	File843 Spectrum391299 scans: 19347	2962.27	3347.72	3330.51	3662.38	3947.61	2139.37	3403.16	2982.23
9	Pavir.J01685.1	Pavir.J01685.1	12930	89351	586	586	33	33	51.9	242609	1	1	1	629.008	1884	3	1884	-0.0019	0	44.47	18	29	0.0016	K	AVITVPAYFNDSQR	T			File828 Spectrum38049 scans: 17401	2877.79	4173.2	3704.71	3775.23	4777.41	4083.7	2619.61	3971.08
9	Pavir.J01685.1	Pavir.J01685.1	12930	89351	586	586	33	33	51.9	242626	1	1	1	629.009	1884.01	3	1884	0.0012	0	47.46	20	29	0.00087	K	AVITVPAYFNDSQR	T			File827 Spectrum13382 scans: 17409	2706.46	3876.55	2637.61	3648.64	2173.71	3088.45	2189.95	4660.58
9	Pavir.J01685.1	Pavir.J01685.1	12930	89351	586	586	33	33	51.9	188213	1	1	1	563.953	1688.84	3	1688.84	-0.002	0	27.87	16	27	0.043	K	MNEVDEESK	Q	Deamidated (NQ)	0.010000000.0	File843 Spectrum378482 scans: 5676	2704.01	2946.38	2653.02	2861.32	3629.81	2638.6	2444.29	2217.62
9	Pavir.J01685.1	Pavir.J01685.1	12930	89351	586	586	33	33	51.9	242624	1	1	1	629.009	1884.01	3	1884	0.0006	0	52.42	17	29	0.00028	K	AVITVPAYFNDSQR	T			File827 Spectrum13403 scans: 17431	2644.4	3489.88	2802.69	2529.03	2686.37	3220.03	3068.4	3216.55
9	Pavir.J01685.1	Pavir.J01685.1	12930	89351	586	586	33	33	51.9	192640	1	1	1	568.955	1703.84	3	1703.85	-0.0052	0	34.34	22	27	0.0094	K	MNEVDEESK	Q	Oxidation (M)	0.300000000.0	File843 Spectrum377069 scans: 4164	2498.03	1638.3	1876.02	2309.48	3411.01	3539.16	2627	1453
9	Pavir.J01685.1	Pavir.J01685.1	12930	89351	586	586	33	33	51.9	242621	1	1	1	629.009	1884.01	3	1884	0.0003	0	43.39	19	29	0.0022	K	AVITVPAYFNDSQR	T			File827 Spectrum13298 scans: 17319	2466.62	4363.48	4015.41	3768.65	5060.5	3750.54	2352.42	3810.76
9	Pavir.J01685.1	Pavir.J01685.1	12930	89351	586	586	33	33	51.9	192890	1	1	1	569.283	1704.83	3	1704.83	-0.0072	0	35.03		25	0.006	K	MNEVDEESK	Q	Deamidated (NQ); Oxidation (M)	0.310000000.0	File843 Spectrum376821 scans: 3892	2058.56	1402.26	1320.43	2027.67	2215.07	2323.73	1933.76	1711.98
9	Pavir.J01685.1	Pavir.J01685.1	12930	89351	586	586	33	33	51.9	242598	1	1	1	629.008	1884	3	1884	-0.0041	0	32.96	17	29	0.023	K	AVITVPAYFNDSQR	T			File831 Spectrum111402 scans: 18521	2050.26	2407.62	2780.15	3043.3	2673.31	2563.01	2568.13	2058.41
9	Pavir.J01685.1	Pavir.J01685.1	12930	89351	586	586	33	33	51.9	444742	1	1	1	906.994	3623.95	4	3623.93	0.0167	0	36.88	18	31	0.013	K	VVGIDLGTTNSAVAAMEGGKPTIVTNAEGAR	T	Deamidated (NQ); Oxidation (M)	0.0000000001000003000000000000000.0	File843 Spectrum388839 scans: 16723	1685.43	1623.48	2057.56	1859.98	1765.27	2759.53	2501.08	2274.79
9	Pavir.J01685.1	Pavir.J01685.1	12930	89351	586	586	33	33	51.9	192900	1	1	1	569.284	1704.83	3	1704.83	-0.0036	0	44.67	18	26	0.00069	K	MNEVDEESK	Q	Deamidated (NQ); Oxidation (M)	0.310000000.0	File843 Spectrum376788 scans: 3856	1633.37	1889.19	1924.26	2150.38	2245.15	2607.33	1999.17	1322.95
9	Pavir.J01685.1	Pavir.J01685.1	12930	89351	586	586	33	33	51.9	192897	1	1	1	569.284	1704.83	3	1704.83	-0.0041	0	41.65		26	0.0014	K	MNEVDEESK	Q	Deamidated (NQ); Oxidation (M)	0.310000000.0	File842 Spectrum353218 scans: 3782	1282.58	997.847	1096.78	1280.35	1988.18	1675.38	1569.38	1036.16
9	Pavir.J01685.1	Pavir.J01685.1	12930	89351	586	586	33	33	51.9	192895	1	1	1	569.284	1704.83	3	1704.83	-0.0045	0	41.22		26	0.0015	K	MNEVDEESK	Q	Deamidated (NQ); Oxidation (M)	0.310000000.0	File842 Spectrum353609 scans: 4288	1056.11	1059.85	764.917	834.001	884.675	1171.47	1148.08	942.655
9	Pavir.J01685.1	Pavir.J01685.1	12930	89351	586	586	33	33	51.9	207409	1	1	1	586.004	1754.99	3	1755	-0.0084	0	42.32		30	0.0031	K	DAVAGGSTQTIK	D			File837 Spectrum241631 scans: 5364	961.106	2362.23	1417.07	2037.79	900.621	1247.37	1297.26	1593.14
9	Pavir.J01685.1	Pavir.J01685.1	12930	89351	586	586	33	33	51.9	192637	1	1	1	568.955	1703.84	3	1703.85	-0.0065	0	32.23	21	26	0.014	K	MNEVDEESK	Q	Oxidation (M)	0.300000000.0	File842 Spectrum353354 scans: 3971	847.699	787.131	778.931	932.751	1078.18	971.813	602.97	606.649
9	Pavir.J01685.1	Pavir.J01685.1	12930	89351	586	586	33	33	51.9	192644	1	1	1	568.956	1703.85	3	1703.85	-0.0043	0	28.93	18	26	0.032	K	MNEVDEESK	Q	Oxidation (M)	0.300000000.0	File842 Spectrum353421 scans: 4046	830.634	731.872	796.062	722.71	981.129	874.892	652.74	562.925
9	Pavir.J01685.1	Pavir.J01685.1	12930	89351	586	586	33	33	51.9	192894	1	1	1	569.284	1704.83	3	1704.83	-0.0047	0	27.08		26	0.04	K	MNEVDEESK	Q	Deamidated (NQ); Oxidation (M)	0.310000000.0	File841 Spectrum330220 scans: 3778	718.314	772.106	487.808	902.308	936.002	1036.55	793.044	759.573
9	Pavir.J01685.1	Pavir.J01685.1	12930	89351	586	586	33	33	51.9	207413	1	1	1	586.005	1754.99	3	1755	-0.0071	0	34.22	17	30	0.019	K	DAVAGGSTQTIK	D			File837 Spectrum241591 scans: 5319	606.159	1599.45	1051.54	1363.85	643.083	657.843	894.593	1408.15
9	Pavir.J01685.1	Pavir.J01685.1	12930	89351	586	586	33	33	51.9	192891	1	1	1	569.283	1704.83	3	1704.83	-0.0061	0	27.84	15	25	0.031	K	MNEVDEESK	Q	Deamidated (NQ); Oxidation (M)	0.310000000.0	File841 Spectrum330535 scans: 4208	562.831	886.906	720.307	593.714	649.757	740.881	602.657	480.185
9	Pavir.J01685.1	Pavir.J01685.1	12930	89351	586	586	33	33	51.9	444402	1	1	1	902.745	3606.95	4	3606.95	0.0013	0	33.82	16	30	0.025	K	VVGIDLGTTNSAVAAMEGGKPTIVTNAEGAR	T			File846 Spectrum471520 scans: 29981	419.143	368.861	559.666	316.654	545.433	393.428	600.426	496.329
10	Pavir.Ga01464.1	Pavir.Ga01464.1	10857	49553	489	489	14	14	44.6	429655	1	1	1	1079.22	3234.65	3	3234.65	-0.0037	0	39.17		31	0.009	K	YDSTLGIFDADVRPEGDSAISVDGK	V			File839 Spectrum300384 scans: 20886	42248.1	28743.5	37837.1	24889.9	35007.4	39031.5	30311.5	22052.8
10	Pavir.Ga01464.1	Pavir.Ga01464.1	10857	49553	489	489	14	14	44.6	429653	1	1	1	809.668	3234.64	4	3234.65	-0.0056	0	42	18	31	0.0046	K	YDSTLGIFDADVRPEGDSAISVDGK	V			File837 Spectrum255171 scans: 19811	37303.8	32766.8	39654.4	25337.6	35852	39851.5	32691.7	29194.5
10	Pavir.Ga01464.1	Pavir.Ga01464.1	10857	49553	489	489	14	14	44.6	429651	1	1	1	1079.22	3234.64	3	3234.65	-0.011	0	42.62		31	0.004	K	YDSTLGIFDADVRPEGDSAISVDGK	V			File837 Spectrum255188 scans: 19829	23508.4	20490.4	23749.1	18706	22161.8	26784.9	18535.8	14743
10	Pavir.Ga01464.1	Pavir.Ga01464.1	10857	49553	489	489	14	14	44.6	429654	1	1	1	809.669	3234.65	4	3234.65	-0.0039	0	49.94	16	31	0.00076	K	YDSTLGIFDADVRPEGDSAISVDGK	V			File840 Spectrum322367 scans: 20437	12433.8	12333.3	10370.6	9457.4	8363.8	10176.7	7900.43	7639.45
10	Pavir.Ga01464.1	Pavir.Ga01464.1	10857	49553	489	489	14	14	44.6	429665	1	1	1	809.671	3234.65	4	3234.65	0.0027	0	39.97	15	31	0.0077	K	YDSTLGIFDADVRPEGDSAISVDGK	V			File839 Spectrum299918 scans: 20389	11926.5	9015.84	11291.8	10055.3	8773.84	11690.3	9892.66	8306.53	emPAI	21.08	Quantitation summary for protein	113/115	1.259	8	1.059	*	114/115	1.066	8	1.081
10	Pavir.Ga01464.1	Pavir.Ga01464.1	10857	49553	489	489	14	14	44.6	429658	1	1	1	1079.22	3234.65	3	3234.65	-0.0022	0	34.51		31	0.027	K	YDSTLGIFDADVRPEGDSAISVDGK	V			File839 Spectrum300358 scans: 20858	11424.6	8555.16	9922.96	8464.66	9629.85	9178.09	8967.32	6767.21
10	Pavir.Ga01464.1	Pavir.Ga01464.1	10857	49553	489	489	14	14	44.6	429664	1	1	1	809.671	3234.65	4	3234.65	0.0027	0	40.74	19	31	0.0065	K	YDSTLGIFDADVRPEGDSAISVDGK	V			File840 Spectrum322412 scans: 20485	9518.9	7010.34	7081.79	7230.86	6521.84	7501.4	7046.94	7471.28
10	Pavir.Ga01464.1	Pavir.Ga01464.1	10857	49553	489	489	14	14	44.6	429650	1	1	1	809.667	3234.64	4	3234.65	-0.0113	0	36.57	15	31	0.016	K	YDSTLGIFDADVRPEGDSAISVDGK	V			File839 Spectrum300779 scans: 21307	8639.12	5834.43	7907.62	6070.14	6621.65	8150.42	6512.5	5856.84
11	Pavir.Gb01533.1	Pavir.Gb01533.1	10821	49658	488	488	15	15	52.1	441012	1	1	1	871.712	3482.82	4	3482.82	-0.001	0	53.04		31	0.00038	K	YDSTLGTFDADVKPVGDNGISVDGK	V	Deamidated (NQ)	0.0000000000000000010000000.0	File836 Spectrum232001 scans: 18654	43781.6	21425.7	31294.6	20533.6	25546.4	29747.2	30006.9	22579.8
11	Pavir.Gb01533.1	Pavir.Gb01533.1	10821	49658	488	488	15	15	52.1	440965	1	1	1	871.464	3481.83	4	3481.83	-0.0084	0	31.3		31	0.056	K	YDSTLGTFDADVKPVGDNGISVDGK	V			File838 Spectrum276255 scans: 18528	18031.3	6748.04	6607.53	4795.07	9024.95	7627.76	15396	6714.51
11	Pavir.Gb01533.1	Pavir.Gb01533.1	10821	49658	488	488	15	15	52.1	441010	1	1	1	1161.95	3482.81	3	3482.82	-0.0048	0	49.99		31	0.00077	K	YDSTLGTFDADVKPVGDNGISVDGK	V	Deamidated (NQ)	0.0000000000000000010000000.0	File836 Spectrum232097 scans: 18756	14955.1	9682.43	13948	9511.44	10866.9	14583.5	11037.7	9829.04
11	Pavir.Gb01533.1	Pavir.Gb01533.1	10821	49658	488	488	15	15	52.1	442710	1	1	1	1181.96	3542.86	3	3542.87	-0.0074	1	43.3	17	31	0.0037	K	VVSDRNPSNLPWGDLGIDLVIEGTGVFVDR	E			File833 Spectrum168127 scans: 28821	13020.1	10175.6	8361.44	7204.38	10786.2	10819.5	7106.73	6278.39	emPAI	23.94	Quantitation summary for protein	113/115	1.83	7	1.104	*	114/115	1.307	7	1.084
11	Pavir.Gb01533.1	Pavir.Gb01533.1	10821	49658	488	488	15	15	52.1	441014	1	1	1	1161.95	3482.82	3	3482.82	0.0003	0	45.98		31	0.0019	K	YDSTLGTFDADVKPVGDNGISVDGK	V	Deamidated (NQ)	0.0000000000000000010000000.0	File835 Spectrum207880 scans: 18305	12753.3	7517.79	14545.5	8996.69	12360.1	12803.3	12201.3	8756.11
11	Pavir.Gb01533.1	Pavir.Gb01533.1	10821	49658	488	488	15	15	52.1	441013	1	1	1	871.712	3482.82	4	3482.82	-0.0007	0	60.18		31	7.2e-05	K	YDSTLGTFDADVKPVGDNGISVDGK	V	Deamidated (NQ)	0.0000000000000000010000000.0	File835 Spectrum207777 scans: 18195	12211.3	7305.95	10458.1	8447.34	12355	12449.8	10441.7	8812.17
11	Pavir.Gb01533.1	Pavir.Gb01533.1	10821	49658	488	488	15	15	52.1	441011	1	1	1	1161.95	3482.82	3	3482.82	-0.003	0	32.53		31	0.042	K	YDSTLGTFDADVKPVGDNGISVDGK	V	Deamidated (NQ)	0.0000000000000000010000000.0	File835 Spectrum207927 scans: 18355	10083.5	5350.27	7563.16	3972.97	8191.08	9622.87	5918.74	6134.88
12	Pavir.Ca00431.1	Pavir.Ca00431.1	10707	90760	470	470	36	36	61.2	169539	1	1	1	544.617	1630.83	3	1630.83	-0.0047	0	35	21	27	0.0086	K	MSEVDDEAK	Q			File846 Spectrum451713 scans: 7873	167377	158632	172377	214740	187012	142027	165054	179383
12	Pavir.Ca00431.1	Pavir.Ca00431.1	10707	90760	470	470	36	36	61.2	169541	1	1	1	544.617	1630.83	3	1630.83	-0.0044	0	33.83	20	27	0.011	K	MSEVDDEAK	Q			File846 Spectrum451742 scans: 7904	129796	121420	97822.1	146213	139786	105532	103264	128146
12	Pavir.Ca00431.1	Pavir.Ca00431.1	10707	90760	470	470	36	36	61.2	126958	1	1	1	504.301	1509.88	3	1509.89	-0.0064	0	32.37	26	28	0.023	K	DEGIDLLK	D			File833 Spectrum154930 scans: 14745	106338	125811	87987.7	129497	73314.1	54632.7	72453.7	116599
12	Pavir.Ca00431.1	Pavir.Ca00431.1	10707	90760	470	470	36	36	61.2	126963	1	1	1	504.301	1509.88	3	1509.89	-0.0061	0	34.13	27	28	0.015	K	DEGIDLLK	D			File833 Spectrum155004 scans: 14824	74467.5	68421.7	46493.7	77900.6	52134.9	39089.2	49189.5	81428.5
12	Pavir.Ca00431.1	Pavir.Ca00431.1	10707	90760	470	470	36	36	61.2	444486	1	0	1	903.24	3608.93	4	3608.93	0.0008	0	52.56		31	0.00037	K	VVGIDLGTTNSAVAAMEGGKPTVVTNAEGAR	T	Oxidation (M)	0.0000000000000003000000000000000.0	File843 Spectrum387703 scans: 15512	66036.6	43709.1	39399.5	62641.4	37179.1	35500.2	39661.7	40618.9
12	Pavir.Ca00431.1	Pavir.Ca00431.1	10707	90760	470	470	36	36	61.2	126972	1	1	1	755.948	1509.88	2	1509.89	-0.0043	0	38.33		28	0.0056	K	DEGIDLLK	D			File833 Spectrum154931 scans: 14746	61171.2	67228.5	51569.2	76627.8	45892.8	37824	45595.2	71898.8
12	Pavir.Ca00431.1	Pavir.Ca00431.1	10707	90760	470	470	36	36	61.2	174630	1	1	1	549.948	1646.82	3	1646.83	-0.0065	0	34.68	20	27	0.009	K	MSEVDDEAK	Q	Oxidation (M)	0.300000000.0	File843 Spectrum377180 scans: 4284	46903.8	26919.5	34821.7	42579.8	36985.7	28242.3	18159.1	30909.9
12	Pavir.Ca00431.1	Pavir.Ca00431.1	10707	90760	470	470	36	36	61.2	119519	1	1	1	744.453	1486.89	2	1486.9	-0.0054	0	36.19		27	0.0066	K	QVSYGVVK	D			File839 Spectrum287893 scans: 7562	40565.9	46178.3	37071.7	50388.2	46836.2	30045.4	36157.5	43758.1
12	Pavir.Ca00431.1	Pavir.Ca00431.1	10707	90760	470	470	36	36	61.2	126955	1	1	1	755.947	1509.88	2	1509.89	-0.0072	0	45.6		28	0.0011	K	DEGIDLLK	D			File833 Spectrum155006 scans: 14826	37479.5	36272.7	27087.3	39472	29681.9	21674.9	30612.5	36829.5
12	Pavir.Ca00431.1	Pavir.Ca00431.1	10707	90760	470	470	36	36	61.2	444101	1	1	1	899.487	3593.92	4	3593.92	-0.001	0	41.18	17	31	0.0053	K	VVGIDLGTTNSAVAAMEGGKPTVVTNAEGAR	T	Deamidated (NQ)	0.0000000001000000000000000000000.0	File843 Spectrum392308 scans: 20424	29904.4	33706.3	39685.9	36248.3	36360.5	37560.3	54432.9	35932.6
12	Pavir.Ca00431.1	Pavir.Ca00431.1	10707	90760	470	470	36	36	61.2	444058	1	1	1	899.239	3592.93	4	3592.93	-0.007	0	45.28	18	31	0.0019	K	VVGIDLGTTNSAVAAMEGGKPTVVTNAEGAR	T			File845 Spectrum439087 scans: 20045	29773.3	33323.9	26074.1	39049.1	24878.4	27890.2	21310.5	28151.8
12	Pavir.Ca00431.1	Pavir.Ca00431.1	10707	90760	470	470	36	36	61.2	444059	1	1	1	1198.65	3592.93	3	3592.93	-0.0047	0	50.84	17	31	0.00052	K	VVGIDLGTTNSAVAAMEGGKPTVVTNAEGAR	T			File845 Spectrum439160 scans: 20123	29238	38733.9	31870.1	33791.5	24182.6	22164.8	17923.4	29654.2
12	Pavir.Ca00431.1	Pavir.Ca00431.1	10707	90760	470	470	36	36	61.2	169542	1	1	1	544.617	1630.83	3	1630.83	-0.0044	0	31.47	20	27	0.019	K	MSEVDDEAK	Q			File846 Spectrum451788 scans: 7953	28251.1	22423.5	27716.4	32931.4	31163.2	22604.2	21900.5	24732.4
12	Pavir.Ca00431.1	Pavir.Ca00431.1	10707	90760	470	470	36	36	61.2	444098	1	1	1	899.486	3593.91	4	3593.92	-0.0051	0	52.1	17	31	0.00044	K	VVGIDLGTTNSAVAAMEGGKPTVVTNAEGAR	T	Deamidated (NQ)	0.0000000000000000000000000100000.0	File844 Spectrum415172 scans: 19822	27262	32634	28681.7	23742.6	28357	15398.5	20018.1	30528.7
12	Pavir.Ca00431.1	Pavir.Ca00431.1	10707	90760	470	470	36	36	61.2	260514	1	1	1	978.441	1954.87	2	1954.87	-0.0023	0	32.62		21	0.0043	K	GPNDGDVIDADFTDSN	-			File846 Spectrum457548 scans: 14097	25203.1	26097.6	21728.6	25359.9	20063.8	18957.2	13001.2	21312.9
12	Pavir.Ca00431.1	Pavir.Ca00431.1	10707	90760	470	470	36	36	61.2	444508	1	1	1	903.485	3609.91	4	3609.91	-0.0045	0	42.45	18	31	0.0042	K	VVGIDLGTTNSAVAAMEGGKPTVVTNAEGAR	T	Deamidated (NQ); Oxidation (M)	0.0000000000000003000000000100000.0	File842 Spectrum363764 scans: 15139	23963.5	27752.5	29045.8	27209.7	25147.6	23023.9	24053.2	17411.3
12	Pavir.Ca00431.1	Pavir.Ca00431.1	10707	90760	470	470	36	36	61.2	126949	1	1	1	504.3	1509.88	3	1509.89	-0.0093	0	33.95	26	28	0.016	K	DEGIDLLK	D			File833 Spectrum155050 scans: 14873	23753.4	22760.1	20756.9	25445.5	16837.4	12172.8	16695	26537.4
12	Pavir.Ca00431.1	Pavir.Ca00431.1	10707	90760	470	470	36	36	61.2	260510	1	1	1	978.441	1954.87	2	1954.87	-0.003	0	39.09		21	0.00096	K	GPNDGDVIDADFTDSN	-			File846 Spectrum457593 scans: 14145	21325.4	23041.4	23324	26989.5	20709	15101.7	18482.3	22837.6
12	Pavir.Ca00431.1	Pavir.Ca00431.1	10707	90760	470	470	36	36	61.2	444506	1	1	1	903.484	3609.91	4	3609.91	-0.0055	0	37.67	20	31	0.013	K	VVGIDLGTTNSAVAAMEGGKPTVVTNAEGAR	T	Deamidated (NQ); Oxidation (M)	0.0000000001000003000000000000000.0	File840 Spectrum317983 scans: 15761	20713.4	23086	14447	21296.7	12924.5	14717.3	10766.8	13879.7
12	Pavir.Ca00431.1	Pavir.Ca00431.1	10707	90760	470	470	36	36	61.2	169546	1	1	1	816.422	1630.83	2	1630.83	-0.0032	0	39.29	17	27	0.0033	K	MSEVDDEAK	Q			File846 Spectrum451650 scans: 7805	18610.1	22598.2	22331.5	25740.6	21251.3	19863.7	19177.3	21380.2
12	Pavir.Ca00431.1	Pavir.Ca00431.1	10707	90760	470	470	36	36	61.2	444103	1	1	1	899.487	3593.92	4	3593.92	0.0002	0	39.42	18	31	0.0079	K	VVGIDLGTTNSAVAAMEGGKPTVVTNAEGAR	T	Deamidated (NQ)	0.0000000001000000000000000000000.0	File843 Spectrum390720 scans: 18730	18391.8	17932.1	14757.9	20209.9	13787.3	10173.6	13179.1	20146.9
12	Pavir.Ca00431.1	Pavir.Ca00431.1	10707	90760	470	470	36	36	61.2	444100	1	1	1	899.486	3593.92	4	3593.92	-0.002	0	32.06	16	31	0.043	K	VVGIDLGTTNSAVAAMEGGKPTVVTNAEGAR	T	Deamidated (NQ)	0.0000000001000000000000000000000.0	File843 Spectrum390782 scans: 18796	18338.4	18163.9	13634.6	19465.1	10302.6	12299.1	12708.4	20550.5
12	Pavir.Ca00431.1	Pavir.Ca00431.1	10707	90760	470	470	36	36	61.2	444476	2	0	1	903.235	3608.91	4	3608.93	-0.0193	0	41.44		31	0.0051	K	VVGIDLGTTNSAVAAMEGGKPTVVTNAEGAR	T	Oxidation (M)	0.0000000000000003000000000000000.0	File842 Spectrum369086 scans: 20816	18316.7	16726.6	17167.7	16537.5	15555.5	15173.9	26689.3	17445
12	Pavir.Ca00431.1	Pavir.Ca00431.1	10707	90760	470	470	36	36	61.2	444487	1	0	1	903.24	3608.93	4	3608.93	0.0015	0	66.16		31	1.6e-05	K	VVGIDLGTTNSAVAAMEGGKPTVVTNAEGAR	T	Oxidation (M)	0.0000000000000003000000000000000.0	File843 Spectrum387866 scans: 15686	17887.6	11700.6	15540.1	19023.7	15894.4	14909.1	16414.6	17332.8
12	Pavir.Ca00431.1	Pavir.Ca00431.1	10707	90760	470	470	36	36	61.2	444511	1	1	1	903.486	3609.91	4	3609.91	-0.0006	0	58.12	20	31	0.00011	K	VVGIDLGTTNSAVAAMEGGKPTVVTNAEGAR	T	Deamidated (NQ); Oxidation (M)	0.0000000001000003000000000000000.0	File841 Spectrum342192 scans: 16660	17374.2	13243.7	14573	10660.7	8918.49	7033.87	5377.28	8270.66
12	Pavir.Ca00431.1	Pavir.Ca00431.1	10707	90760	470	470	36	36	61.2	444475	2	0	1	903.235	3608.91	4	3608.93	-0.0195	0	35.6		31	0.02	K	VVGIDLGTTNSAVAAMEGGKPTVVTNAEGAR	T	Oxidation (M)	0.0000000000000003000000000000000.0	File842 Spectrum368051 scans: 19712	17332.8	9201.15	13120.3	17759.1	19220.4	16248.1	19201	17938.3
12	Pavir.Ca00431.1	Pavir.Ca00431.1	10707	90760	470	470	36	36	61.2	444505	1	1	1	903.484	3609.91	4	3609.91	-0.0067	0	71.72	21	31	5e-06	K	VVGIDLGTTNSAVAAMEGGKPTVVTNAEGAR	T	Deamidated (NQ); Oxidation (M)	0.0000000000000003000000000100000.0	File842 Spectrum363857 scans: 15238	16760	16965.9	17801.7	20309.1	19400.6	13156.8	16051.1	15382.1
12	Pavir.Ca00431.1	Pavir.Ca00431.1	10707	90760	470	470	36	36	61.2	444061	1	1	1	899.24	3592.93	4	3592.93	-0.0038	0	48.83	17	31	0.00083	K	VVGIDLGTTNSAVAAMEGGKPTVVTNAEGAR	T			File846 Spectrum463226 scans: 20153	16320.3	22153	19223	21764.3	15823.9	11237.4	18986.2	20976.5
12	Pavir.Ca00431.1	Pavir.Ca00431.1	10707	90760	470	470	36	36	61.2	126965	1	1	1	755.948	1509.88	2	1509.89	-0.0058	0	44.08		28	0.0015	K	DEGIDLLK	D			File833 Spectrum155039 scans: 14861	16313.5	15225.5	12518.6	16506	10518.3	8405.99	11411.1	16492
12	Pavir.Ca00431.1	Pavir.Ca00431.1	10707	90760	470	470	36	36	61.2	119524	1	1	1	744.454	1486.89	2	1486.9	-0.0035	0	27.33		27	0.053	K	QVSYGVVK	D			File839 Spectrum287939 scans: 7611	16256.7	18169.4	13782.2	22477.4	17393.7	11179.2	14634.4	18633.4
12	Pavir.Ca00431.1	Pavir.Ca00431.1	10707	90760	470	470	36	36	61.2	444057	1	1	1	899.239	3592.93	4	3592.93	-0.007	0	48.8	21	31	0.00085	K	VVGIDLGTTNSAVAAMEGGKPTVVTNAEGAR	T			File846 Spectrum463340 scans: 20275	15122.8	18015.5	15881.4	28562.2	14546.3	18774.7	18083.9	19911.5
12	Pavir.Ca00431.1	Pavir.Ca00431.1	10707	90760	470	470	36	36	61.2	169537	1	1	1	816.421	1630.83	2	1630.83	-0.0059	0	40.5	19	27	0.0023	K	MSEVDDEAK	Q			File846 Spectrum451778 scans: 7942	14400.4	16412.6	16614.3	20015.6	18194.9	16803.7	15148.5	17142.2
12	Pavir.Ca00431.1	Pavir.Ca00431.1	10707	90760	470	470	36	36	61.2	444473	2	0	1	903.235	3608.91	4	3608.93	-0.0197	0	33.37		31	0.033	K	VVGIDLGTTNSAVAAMEGGKPTVVTNAEGAR	T	Oxidation (M)	0.0000000000000003000000000000000.0	File842 Spectrum369595 scans: 21359	14285.4	9308.06	11756.2	13241.6	14065.7	10979.9	15827.5	9520.73
12	Pavir.Ca00431.1	Pavir.Ca00431.1	10707	90760	470	470	36	36	61.2	444093	1	1	1	1198.98	3593.9	3	3593.92	-0.0135	0	46.52	22	31	0.0016	K	VVGIDLGTTNSAVAAMEGGKPTVVTNAEGAR	T	Deamidated (NQ)	0.0000000000000000000000000100000.0	File844 Spectrum415111 scans: 19757	14266.6	16111.8	15270.2	15201.4	13002.9	9611.81	13913.9	14978.4
12	Pavir.Ca00431.1	Pavir.Ca00431.1	10707	90760	470	470	36	36	61.2	444502	1	1	1	903.482	3609.9	4	3609.91	-0.0157	0	51.87	19	31	0.00049	K	VVGIDLGTTNSAVAAMEGGKPTVVTNAEGAR	T	Deamidated (NQ); Oxidation (M)	0.0000000000000003000000000100000.0	File842 Spectrum363871 scans: 15253	13949.7	19533.5	14279.5	16645.9	9739.49	9763.22	10081.6	12579.2
12	Pavir.Ca00431.1	Pavir.Ca00431.1	10707	90760	470	470	36	36	61.2	444054	1	1	1	899.236	3592.91	4	3592.93	-0.0214	0	32.2	16	31	0.041	K	VVGIDLGTTNSAVAAMEGGKPTVVTNAEGAR	T			File844 Spectrum415789 scans: 20480	13357.3	18929.3	17428.9	18596.4	14962.2	12427.8	13591.2	18510
12	Pavir.Ca00431.1	Pavir.Ca00431.1	10707	90760	470	470	36	36	61.2	444509	1	1	1	903.485	3609.91	4	3609.91	-0.0025	0	61.99	21	31	4.6e-05	K	VVGIDLGTTNSAVAAMEGGKPTVVTNAEGAR	T	Deamidated (NQ); Oxidation (M)	0.0000000001000003000000000000000.0	File841 Spectrum341463 scans: 15882	12611.9	14160.8	12123.7	15104.5	9962.14	7422.44	9098.16	11850.5
12	Pavir.Ca00431.1	Pavir.Ca00431.1	10707	90760	470	470	36	36	61.2	444116	1	1	1	899.734	3594.91	4	3594.9	0.0052	0	41.2	16	31	0.0055	K	VVGIDLGTTNSAVAAMEGGKPTVVTNAEGAR	T	2 Deamidated (NQ)	0.0000000001000000000000000100000.0	File841 Spectrum344544 scans: 19169	10848.5	12021.5	11668.2	15563.1	10154.5	10243.8	7495.24	14260.9
12	Pavir.Ca00431.1	Pavir.Ca00431.1	10707	90760	470	470	36	36	61.2	174628	1	1	1	549.947	1646.82	3	1646.83	-0.0077	0	37.08	18	27	0.0051	K	MSEVDDEAK	Q	Oxidation (M)	0.300000000.0	File843 Spectrum377151 scans: 4253	10322.1	12485.8	8257.6	12046	10542.3	9425.4	9272.37	7198.85
12	Pavir.Ca00431.1	Pavir.Ca00431.1	10707	90760	470	470	36	36	61.2	126974	1	1	1	504.302	1509.88	3	1509.89	-0.0035	0	35.23	27	30	0.018	K	DEGIDLLK	D			File833 Spectrum155085 scans: 14910	9741.43	11678.2	8535.44	10216.8	6530.11	5757.95	7135.32	11023.1
12	Pavir.Ca00431.1	Pavir.Ca00431.1	10707	90760	470	470	36	36	61.2	444469	2	0	1	903.234	3608.91	4	3608.93	-0.0241	0	34.37		31	0.027	K	VVGIDLGTTNSAVAAMEGGKPTVVTNAEGAR	T	Oxidation (M)	0.0000000000000003000000000000000.0	File842 Spectrum368822 scans: 20534	9706.95	8351.77	10778.2	9872.74	11103.9	8611.4	10090.7	8346.89
12	Pavir.Ca00431.1	Pavir.Ca00431.1	10707	90760	470	470	36	36	61.2	444114	1	1	1	899.731	3594.9	4	3594.9	-0.0058	0	49.99	16	31	0.00076	K	VVGIDLGTTNSAVAAMEGGKPTVVTNAEGAR	T	2 Deamidated (NQ)	0.0000000001000000000000000100000.0	File841 Spectrum344508 scans: 19130	9694.06	13671	11611.6	12918.2	7426.98	10160.8	9232.13	11323.5
12	Pavir.Ca00431.1	Pavir.Ca00431.1	10707	90760	470	470	36	36	61.2	174637	1	1	1	824.419	1646.82	2	1646.83	-0.0043	0	31.26	24	27	0.021	K	MSEVDDEAK	Q	Oxidation (M)	0.300000000.0	File843 Spectrum377198 scans: 4303	9265.65	8776.32	6621.98	9682.28	8192.17	7378.12	5837.11	6342.29
12	Pavir.Ca00431.1	Pavir.Ca00431.1	10707	90760	470	470	36	36	61.2	444484	1	0	1	903.238	3608.92	4	3608.93	-0.0053	0	45.68		31	0.0018	K	VVGIDLGTTNSAVAAMEGGKPTVVTNAEGAR	T	Oxidation (M)	0.0000000000000003000000000000000.0	File845 Spectrum435029 scans: 15716	9066.49	9102.59	8462.74	9054.7	7467.78	7120.91	6333.36	8178.72
12	Pavir.Ca00431.1	Pavir.Ca00431.1	10707	90760	470	470	36	36	61.2	444517	1	1	1	903.728	3610.88	4	3610.9	-0.0134	0	50.83	18	32	0.00066	K	VVGIDLGTTNSAVAAMEGGKPTVVTNAEGAR	T	2 Deamidated (NQ); Oxidation (M)	0.0000000001000003000000000100000.0	File837 Spectrum250905 scans: 15260	8836.18	5129.55	4350.79	5255.55	3954.52	4091.89	4690.35	5853.48
12	Pavir.Ca00431.1	Pavir.Ca00431.1	10707	90760	470	470	36	36	61.2	260516	1	1	1	978.442	1954.87	2	1954.87	-0.0012	0	70.33	20	21	7.2e-07	K	GPNDGDVIDADFTDSN	-			File846 Spectrum457639 scans: 14194	8808.35	10588.2	8199.77	9468.01	10245.3	7030.67	7784.05	8414.16
12	Pavir.Ca00431.1	Pavir.Ca00431.1	10707	90760	470	470	36	36	61.2	444480	2	0	1	903.236	3608.91	4	3608.93	-0.0146	0	48.08		31	0.0011	K	VVGIDLGTTNSAVAAMEGGKPTVVTNAEGAR	T	Oxidation (M)	0.0000000000000003000000000000000.0	File842 Spectrum369674 scans: 21443	8403.96	11201.7	9846.29	11697.5	10226.1	9779.09	11019.4	12825.9
12	Pavir.Ca00431.1	Pavir.Ca00431.1	10707	90760	470	470	36	36	61.2	126977	1	1	1	755.95	1509.88	2	1509.89	-0.0014	0	38.66		30	0.0079	K	DEGIDLLK	D			File833 Spectrum155054 scans: 14877	7849.95	8990.22	6443.27	9252.79	6156.91	4266.99	6344.48	9749.44
12	Pavir.Ca00431.1	Pavir.Ca00431.1	10707	90760	470	470	36	36	61.2	126959	1	1	1	755.947	1509.88	2	1509.89	-0.0064	0	33.65		28	0.017	K	DEGIDLLK	D			File833 Spectrum154887 scans: 14699	7619.56	8747.98	6962.02	7066.94	5760.38	4229.94	5175.07	5391.57
12	Pavir.Ca00431.1	Pavir.Ca00431.1	10707	90760	470	470	36	36	61.2	260518	1	1	1	978.442	1954.87	2	1954.87	-0.0002	0	77.89		22	1.3e-07	K	GPNDGDVIDADFTDSN	-			File846 Spectrum457507 scans: 14053	6877.61	9031.13	8287.92	8789.26	7723.02	7339.14	8752.04	8434.34
12	Pavir.Ca00431.1	Pavir.Ca00431.1	10707	90760	470	470	36	36	61.2	444501	1	1	1	903.477	3609.88	4	3609.91	-0.0333	0	47.62	22	32	0.0014	K	VVGIDLGTTNSAVAAMEGGKPTVVTNAEGAR	T	Deamidated (NQ); Oxidation (M)	0.0000000000000003000000000100000.0	File837 Spectrum250860 scans: 15212	6873.24	6832.66	6645.5	8171.43	4767.85	3089.89	5066.21	5170.7
12	Pavir.Ca00431.1	Pavir.Ca00431.1	10707	90760	470	470	36	36	61.2	126953	1	1	1	504.3	1509.88	3	1509.89	-0.0075	0	34.93	27	28	0.013	K	DEGIDLLK	D			File833 Spectrum155103 scans: 14929	6304	5773.54	4319.99	6853.55	3779.91	4835.3	4441.39	5412.87
12	Pavir.Ca00431.1	Pavir.Ca00431.1	10707	90760	470	470	36	36	61.2	260711	1	1	1	978.932	1955.85	2	1955.85	-0.0047	0	52.19		19	2.9e-05	K	GPNDGDVIDADFTDSN	-	Deamidated (NQ)	0.0010000000000000.0	File845 Spectrum433611 scans: 14204	5165.84	5925.11	6640.22	7279.83	5477.63	5019.74	5483.59	3974.44
12	Pavir.Ca00431.1	Pavir.Ca00431.1	10707	90760	470	470	36	36	61.2	260714	1	1	1	978.933	1955.85	2	1955.85	-0.0024	0	36.97		20	0.0011	K	GPNDGDVIDADFTDSN	-	Deamidated (NQ)	0.0010000000000000.0	File845 Spectrum433645 scans: 14240	4464.98	6069.77	3791.19	4577.34	4188.34	4036.23	5476.1	4517.08
12	Pavir.Ca00431.1	Pavir.Ca00431.1	10707	90760	470	470	36	36	61.2	444055	1	1	1	899.236	3592.92	4	3592.93	-0.018	0	48.64	20	31	0.00091	K	VVGIDLGTTNSAVAAMEGGKPTVVTNAEGAR	T			File846 Spectrum463373 scans: 20310	4011.55	6020.26	6796.71	6191.57	5539.37	5312.23	7633.12	8831.23
12	Pavir.Ca00431.1	Pavir.Ca00431.1	10707	90760	470	470	36	36	61.2	260515	1	1	1	978.442	1954.87	2	1954.87	-0.0013	0	50.45		21	7e-05	K	GPNDGDVIDADFTDSN	-			File846 Spectrum457673 scans: 14230	3748.18	4756.48	4567.52	3389.04	3746.9	2884.6	3184.61	3415
12	Pavir.Ca00431.1	Pavir.Ca00431.1	10707	90760	470	470	36	36	61.2	444482	2	0	1	903.238	3608.92	4	3608.93	-0.0075	0	38.86		31	0.0088	K	VVGIDLGTTNSAVAAMEGGKPTVVTNAEGAR	T	Oxidation (M)	0.0000000000000003000000000000000.0	File843 Spectrum391299 scans: 19347	2962.27	3347.72	3330.51	3662.38	3947.61	2139.37	3403.16	2982.23
12	Pavir.Ca00431.1	Pavir.Ca00431.1	10707	90760	470	470	36	36	61.2	174643	1	1	1	549.949	1646.83	3	1646.83	-0.0032	0	33.21	19	27	0.013	K	MSEVDDEAK	Q	Oxidation (M)	0.300000000.0	File843 Spectrum377327 scans: 4443	2939.89	7186.43	2338.2	3879.25	2756.61	2363.64	2089.31	2922.81
12	Pavir.Ca00431.1	Pavir.Ca00431.1	10707	90760	470	470	36	36	61.2	260521	1	1	1	978.443	1954.87	2	1954.87	0.0024	0	46.55		22	0.00018	K	GPNDGDVIDADFTDSN	-			File827 Spectrum10735 scans: 14585	2889.42	2773.43	2756.16	3325.63	3072.2	2415.67	3216.44	2856.67
12	Pavir.Ca00431.1	Pavir.Ca00431.1	10707	90760	470	470	36	36	61.2	260713	1	1	1	978.933	1955.85	2	1955.85	-0.0032	0	62.02		20	3.4e-06	K	GPNDGDVIDADFTDSN	-	Deamidated (NQ)	0.0010000000000000.0	File845 Spectrum433679 scans: 14276	2849.33	4146.59	3887.78	3954.81	2913.94	2422.19	2985	3594.38
12	Pavir.Ca00431.1	Pavir.Ca00431.1	10707	90760	470	470	36	36	61.2	260517	1	1	1	978.442	1954.87	2	1954.87	-0.0012	0	46.94		21	0.00016	K	GPNDGDVIDADFTDSN	-			File827 Spectrum10708 scans: 14556	2797.61	4780.56	3181.36	3342.41	3358.35	2319.45	3215.64	2643.65
12	Pavir.Ca00431.1	Pavir.Ca00431.1	10707	90760	470	470	36	36	61.2	174636	1	1	1	824.419	1646.82	2	1646.83	-0.0048	0	33.71	25	27	0.011	K	MSEVDDEAK	Q	Oxidation (M)	0.300000000.0	File843 Spectrum377299 scans: 4413	2374.77	2506.13	1859.44	2986.74	2744.76	2257.98	2047.77	2014.69
12	Pavir.Ca00431.1	Pavir.Ca00431.1	10707	90760	470	470	36	36	61.2	260712	1	1	1	978.932	1955.85	2	1955.85	-0.0036	0	61.41		20	3.7e-06	K	GPNDGDVIDADFTDSN	-	Deamidated (NQ)	0.0010000000000000.0	File845 Spectrum433770 scans: 14373	2180.46	2723.58	2758.04	3218.93	2120.05	1892.67	1988.78	3042.78
12	Pavir.Ca00431.1	Pavir.Ca00431.1	10707	90760	470	470	36	36	61.2	260716	1	1	1	978.935	1955.86	2	1955.85	0.0019	0	31.88		20	0.0038	K	GPNDGDVIDADFTDSN	-	Deamidated (NQ)	0.0010000000000000.0	File845 Spectrum433691 scans: 14289	1830.06	3360.17	3502.39	3686.21	1722.43	2385.49	2852.13	2968.78
12	Pavir.Ca00431.1	Pavir.Ca00431.1	10707	90760	470	470	36	36	61.2	174641	1	1	1	549.949	1646.82	3	1646.83	-0.0034	0	28.05	17	27	0.043	K	MSEVDDEAK	Q	Oxidation (M)	0.300000000.0	File843 Spectrum377127 scans: 4227	1646.51	1825.99	1333.49	1616.95	1085.17	1309.94	1029.98	1320.7
13	Pavir.Fb00122.1	Pavir.Fb00122.1	10617	37508	534	534	14	14	54.1	196390	1	1	1	573.317	1716.93	3	1716.94	-0.0116	0	32.03	24	30	0.032	K	EEVFSEIEK	L			File832 Spectrum132913 scans: 16479	427384	379525	175671	529342	102909	143881	241307	582433
13	Pavir.Fb00122.1	Pavir.Fb00122.1	10617	37508	534	534	14	14	54.1	196384	1	1	1	573.316	1716.93	3	1716.94	-0.0123	0	35.39	25	30	0.015	K	EEVFSEIEK	L			File832 Spectrum132884 scans: 16448	349573	477793	224922	377132	142490	116172	283399	539717
13	Pavir.Fb00122.1	Pavir.Fb00122.1	10617	37508	534	534	14	14	54.1	196393	1	1	1	573.317	1716.93	3	1716.94	-0.0109	0	30.89	26	29	0.039	K	EEVFSEIEK	L			File832 Spectrum132853 scans: 16415	267077	315650	116355	334019	145991	83702.9	158395	429285
13	Pavir.Fb00122.1	Pavir.Fb00122.1	10617	37508	534	534	14	14	54.1	196389	1	1	1	573.317	1716.93	3	1716.94	-0.0118	0	30.48	24	30	0.045	K	EEVFSEIEK	L			File832 Spectrum133003 scans: 16575	213894	318226	231098	389449	160817	52226.2	249360	398566
13	Pavir.Fb00122.1	Pavir.Fb00122.1	10617	37508	534	534	14	14	54.1	196388	1	1	1	573.316	1716.93	3	1716.94	-0.0121	0	33.98	29	30	0.02	K	EEVFSEIEK	L			File832 Spectrum133033 scans: 16607	188015	277546	195461	266209	124593	64755.3	108479	288470
13	Pavir.Fb00122.1	Pavir.Fb00122.1	10617	37508	534	534	14	14	54.1	196399	1	1	1	859.472	1716.93	2	1716.94	-0.0096	0	44.32		29	0.0018	K	EEVFSEIEK	L			File832 Spectrum132944 scans: 16512	131374	160238	91321	171495	56539.3	41024.1	96126	191042
13	Pavir.Fb00122.1	Pavir.Fb00122.1	10617	37508	534	534	14	14	54.1	196413	1	1	1	573.318	1716.93	3	1716.94	-0.0066	0	31.29	25	29	0.036	K	EEVFSEIEK	L			File831 Spectrum109734 scans: 16742	118108	154785	77849.4	144154	87271.9	44543.4	96720.5	193845
13	Pavir.Fb00122.1	Pavir.Fb00122.1	10617	37508	534	534	14	14	54.1	196392	1	1	1	859.471	1716.93	2	1716.94	-0.0111	0	44.99		29	0.0015	K	EEVFSEIEK	L			File832 Spectrum133018 scans: 16591	88389	106227	58693.2	119039	44748.6	26161.2	55355.8	142049
13	Pavir.Fb00122.1	Pavir.Fb00122.1	10617	37508	534	534	14	14	54.1	196424	1	1	1	573.319	1716.93	3	1716.94	-0.0046	0	33.92	24	30	0.021	K	EEVFSEIEK	L			File831 Spectrum109673 scans: 16677	60392.3	52006.7	28785.4	73447.3	23317.9	15730.1	30116.5	75878.8
13	Pavir.Fb00122.1	Pavir.Fb00122.1	10617	37508	534	534	14	14	54.1	196403	1	1	1	859.473	1716.93	2	1716.94	-0.0085	0	44.49		30	0.0018	K	EEVFSEIEK	L			File831 Spectrum109947 scans: 16969	58560.8	69204.9	38443.8	73659.6	30572.8	17969.4	46610.8	86753.9
13	Pavir.Fb00122.1	Pavir.Fb00122.1	10617	37508	534	534	14	14	54.1	196386	1	1	1	859.471	1716.93	2	1716.94	-0.0123	0	42.8		30	0.0028	K	EEVFSEIEK	L			File832 Spectrum133069 scans: 16645	52336.9	68668.4	36560.3	66977.8	28613.3	18712.6	38203.7	89590.4
13	Pavir.Fb00122.1	Pavir.Fb00122.1	10617	37508	534	534	14	14	54.1	196396	1	1	1	859.472	1716.93	2	1716.94	-0.0102	0	44.1		29	0.0019	K	EEVFSEIEK	L			File832 Spectrum132756 scans: 16311	44411.1	48850.4	30081.9	52501.5	20487.5	17328.6	34790	64308.6
13	Pavir.Fb00122.1	Pavir.Fb00122.1	10617	37508	534	534	14	14	54.1	196381	1	1	1	859.47	1716.93	2	1716.94	-0.0139	0	43.41		29	0.0022	K	EEVFSEIEK	L			File832 Spectrum132745 scans: 16299	35737.1	40115.1	25340.9	44021.7	19683.8	12244.5	25358.4	53713.9
13	Pavir.Fb00122.1	Pavir.Fb00122.1	10617	37508	534	534	14	14	54.1	196407	1	1	1	859.473	1716.93	2	1716.94	-0.0083	0	38.9		30	0.0066	K	EEVFSEIEK	L			File831 Spectrum109993 scans: 17018	34143.4	37203.7	24505.5	39537.1	16340	13779.4	24657.8	50585.9
13	Pavir.Fb00122.1	Pavir.Fb00122.1	10617	37508	534	534	14	14	54.1	12099	1	1	1	497.787	993.56	2	993.565	-0.0048	0	35.32	16	30	0.016	K	TEIVASA	-			File832 Spectrum126973 scans: 10143	25925.4	20782.6	14635.5	19959.9	8403.98	7966.01	9173.61	13296.7
13	Pavir.Fb00122.1	Pavir.Fb00122.1	10617	37508	534	534	14	14	54.1	196414	1	1	1	573.318	1716.93	3	1716.94	-0.0066	0	29.54	25	29	0.054	K	EEVFSEIEK	L			File831 Spectrum110065 scans: 17095	24372	26984.8	19263.5	35841.4	11907.7	9829.15	20800.5	36493.1
13	Pavir.Fb00122.1	Pavir.Fb00122.1	10617	37508	534	534	14	14	54.1	196387	1	1	1	859.471	1716.93	2	1716.94	-0.0122	0	45.9		30	0.0013	K	EEVFSEIEK	L			File832 Spectrum133128 scans: 16708	22620.4	25247.2	16162.6	25103	10886.9	9750.01	16801.1	33219.4
13	Pavir.Fb00122.1	Pavir.Fb00122.1	10617	37508	534	534	14	14	54.1	12102	1	1	1	497.788	993.561	2	993.565	-0.004	0	52.32	27	30	0.00032	K	TEIVASA	-			File833 Spectrum150474 scans: 9992	21476.7	26790.4	19424.1	21462.4	14060.6	16248.4	15348.3	12646.5
13	Pavir.Fb00122.1	Pavir.Fb00122.1	10617	37508	534	534	14	14	54.1	196411	1	1	1	573.318	1716.93	3	1716.94	-0.0076	0	30.93	25	29	0.04	K	EEVFSEIEK	L			File831 Spectrum109614 scans: 16614	20412.2	20554	10370.1	18053.5	7023.45	7206.84	18122	24855.7
13	Pavir.Fb00122.1	Pavir.Fb00122.1	10617	37508	534	534	14	14	54.1	196416	1	1	1	859.474	1716.93	2	1716.94	-0.0066	0	43.76		29	0.0021	K	EEVFSEIEK	L			File831 Spectrum109669 scans: 16672	19093	25888.4	15076.2	26163.7	10339.8	7331.94	16351.1	29194.5
13	Pavir.Fb00122.1	Pavir.Fb00122.1	10617	37508	534	534	14	14	54.1	12103	1	1	1	497.788	993.561	2	993.565	-0.004	0	31.6	16	29	0.032	K	TEIVASA	-			File833 Spectrum150565 scans: 10089	18481.1	31842.9	13802.4	10792	12558.8	8877.54	7083.63	18196.1
13	Pavir.Fb00122.1	Pavir.Fb00122.1	10617	37508	534	534	14	14	54.1	196409	1	1	1	859.473	1716.93	2	1716.94	-0.0081	0	45.74		30	0.0014	K	EEVFSEIEK	L			File832 Spectrum133152 scans: 16733	13656.3	17814	10894.3	16818	7044.06	5495.78	11345.4	22422.8
13	Pavir.Fb00122.1	Pavir.Fb00122.1	10617	37508	534	534	14	14	54.1	12094	1	1	1	497.787	993.559	2	993.565	-0.0059	0	35.41	16	29	0.013	K	TEIVASA	-			File832 Spectrum126614 scans: 9760	9581.3	22353.9	8573.06	14701.3	11086	6132.12	10477.1	13005.2
13	Pavir.Fb00122.1	Pavir.Fb00122.1	10617	37508	534	534	14	14	54.1	196417	1	1	1	573.318	1716.93	3	1716.94	-0.0064	0	30.07	24	29	0.048	K	EEVFSEIEK	L			File833 Spectrum156977 scans: 16928	8209.69	10338.2	3302.8	5176.81	2580.23	1993.88	3522.03	6545.22
13	Pavir.Fb00122.1	Pavir.Fb00122.1	10617	37508	534	534	14	14	54.1	196394	1	1	1	573.317	1716.93	3	1716.94	-0.0107	0	31.72	27	29	0.033	K	EEVFSEIEK	L			File832 Spectrum132636 scans: 16183	6545.52	8176.11	4730.76	7016.72	2523.15	2593.02	5359.02	9157.48
13	Pavir.Fb00122.1	Pavir.Fb00122.1	10617	37508	534	534	14	14	54.1	421484	1	1	1	1043.24	3126.68	3	3126.7	-0.0104	0	32.58	21	31	0.036	R	LQTYYQNIDSLLTTYEDVIVK	V			File828 Spectrum48781 scans: 28849	6016.16	7360.25	4276	7368.56	4721.38	4020.4	2790.14	7031.8
13	Pavir.Fb00122.1	Pavir.Fb00122.1	10617	37508	534	534	14	14	54.1	421492	1	1	1	1043.24	3126.69	3	3126.7	-0.0078	0	62.9	20	31	3.4e-05	R	LQTYYQNIDSLLTTYEDVIVK	V			File828 Spectrum48854 scans: 28927	3049.61	2561.25	2467.24	3503.96	2419.94	2082.91	2729.22	3182.92
13	Pavir.Fb00122.1	Pavir.Fb00122.1	10617	37508	534	534	14	14	54.1	421496	1	1	1	1043.24	3126.69	3	3126.7	-0.0075	0	58.32	21	31	9.8e-05	R	LQTYYQNIDSLLTTYEDVIVK	V			File845 Spectrum446353 scans: 27795	2964.37	2814.79	2439.53	2758.27	2526.73	1393.58	2770.41	2826.4
13	Pavir.Fb00122.1	Pavir.Fb00122.1	10617	37508	534	534	14	14	54.1	421505	1	1	1	1043.24	3126.69	3	3126.7	-0.0056	0	36.42	21	31	0.015	R	LQTYYQNIDSLLTTYEDVIVK	V			File829 Spectrum73480 scans: 29093	484.001	653.973	459.1	511.413	444.022	375.96	699.682	653.737	emPAI	43.99	Quantitation summary for protein	113/115	0.829	32	1.065	*	114/115	0.415	32	1.102
14	Pavir.Fa02159.1	Pavir.Fa02159.1	10598	37857	531	531	14	14	54.1	188287	1	1	1	563.974	1688.9	3	1688.91	-0.009	0	31.37		29	0.033	K	EDVFSEIDK	L			File831 Spectrum109403 scans: 16389	600567	754518	458043	940714	149752	242580	532679	996582
14	Pavir.Fa02159.1	Pavir.Fa02159.1	10598	37857	531	531	14	14	54.1	188290	1	1	1	563.974	1688.9	3	1688.91	-0.0086	0	29.44		29	0.053	K	EDVFSEIDK	L			File831 Spectrum109433 scans: 16421	574289	765648	547853	918812	184839	160065	616306	931332
14	Pavir.Fa02159.1	Pavir.Fa02159.1	10598	37857	531	531	14	14	54.1	188296	1	1	1	563.974	1688.9	3	1688.91	-0.0075	0	33.63		29	0.02	K	EDVFSEIDK	L			File831 Spectrum109463 scans: 16453	569961	673563	378965	1.18664e+06	242207	206415	401007	893101
14	Pavir.Fa02159.1	Pavir.Fa02159.1	10598	37857	531	531	14	14	54.1	188266	1	1	1	563.973	1688.9	3	1688.91	-0.0123	0	30.88		29	0.037	K	EDVFSEIDK	L			File832 Spectrum132463 scans: 15999	317020	535624	298699	615009	135759	97935	245176	646001
14	Pavir.Fa02159.1	Pavir.Fa02159.1	10598	37857	531	531	14	14	54.1	188282	1	1	1	563.973	1688.9	3	1688.91	-0.0101	0	34.27		29	0.017	K	EDVFSEIDK	L			File831 Spectrum109343 scans: 16325	287119	390695	239888	413947	75018.7	38672.7	240487	517855
14	Pavir.Fa02159.1	Pavir.Fa02159.1	10598	37857	531	531	14	14	54.1	14266	1	1	1	511.292	1020.57	2	1020.58	-0.0059	0	31.67		29	0.033	K	TEIVANA	-			File832 Spectrum126703 scans: 9855	229752	126722	216921	261257	52186.2	125324	230222	243624
14	Pavir.Fa02159.1	Pavir.Fa02159.1	10598	37857	531	531	14	14	54.1	14265	1	1	1	511.292	1020.57	2	1020.58	-0.0069	0	34.48		29	0.018	K	TEIVANA	-			File832 Spectrum126613 scans: 9759	139291	246814	120185	214378	108721	60698.9	202322	237458
14	Pavir.Fa02159.1	Pavir.Fa02159.1	10598	37857	531	531	14	14	54.1	14268	1	1	1	511.292	1020.57	2	1020.58	-0.0057	0	38.03		29	0.0076	K	TEIVANA	-			File832 Spectrum126793 scans: 9951	111915	71397.7	97903.3	126824	127206	59956.3	89262.1	131173
14	Pavir.Fa02159.1	Pavir.Fa02159.1	10598	37857	531	531	14	14	54.1	188285	1	1	1	845.457	1688.9	2	1688.91	-0.0094	0	46.27		29	0.0011	K	EDVFSEIDK	L			File831 Spectrum109558 scans: 16554	100898	109230	84722.9	143848	35298.9	23370.3	82234.7	157745
14	Pavir.Fa02159.1	Pavir.Fa02159.1	10598	37857	531	531	14	14	54.1	188279	1	1	1	845.456	1688.9	2	1688.91	-0.0104	0	58.08		29	6.9e-05	K	EDVFSEIDK	L			File832 Spectrum132628 scans: 16175	63497.2	70281.2	45697.9	81351.6	17508.1	14069.6	55208.9	100869
14	Pavir.Fa02159.1	Pavir.Fa02159.1	10598	37857	531	531	14	14	54.1	14267	1	1	1	511.292	1020.57	2	1020.58	-0.0059	0	33.88		29	0.02	K	TEIVANA	-			File832 Spectrum126523 scans: 9663	61657.3	67761.1	69166.2	112647	42665.2	36868.4	60376.1	75632.2
14	Pavir.Fa02159.1	Pavir.Fa02159.1	10598	37857	531	531	14	14	54.1	188297	1	1	1	845.458	1688.9	2	1688.91	-0.0073	0	47.26		29	0.00085	K	EDVFSEIDK	L			File831 Spectrum109586 scans: 16584	49758	56174.4	43266.4	68872.1	17044.3	10681.8	36094.2	77201.8
14	Pavir.Fa02159.1	Pavir.Fa02159.1	10598	37857	531	531	14	14	54.1	188294	1	1	1	563.974	1688.9	3	1688.91	-0.0079	0	31.36		29	0.034	K	EDVFSEIDK	L			File831 Spectrum109285 scans: 16263	47759.5	54357.9	34869.4	60374.9	16530.3	16223.5	35428.9	66113.7
14	Pavir.Fa02159.1	Pavir.Fa02159.1	10598	37857	531	531	14	14	54.1	188271	1	1	1	845.456	1688.9	2	1688.91	-0.011	0	44.22		29	0.0017	K	EDVFSEIDK	L			File831 Spectrum109296 scans: 16274	44376.9	54674	38869.4	64018.6	17020.8	12207.7	39953.5	72739.6
14	Pavir.Fa02159.1	Pavir.Fa02159.1	10598	37857	531	531	14	14	54.1	14269	1	1	1	511.292	1020.57	2	1020.58	-0.0056	0	51.32		29	0.00036	K	TEIVANA	-			File832 Spectrum126493 scans: 9631	43690.5	37826.3	39643.7	59886.7	40996.8	23305.2	41507.5	45596.8
14	Pavir.Fa02159.1	Pavir.Fa02159.1	10598	37857	531	531	14	14	54.1	188262	1	1	1	845.455	1688.9	2	1688.91	-0.013	0	38.21		29	0.007	K	EDVFSEIDK	L			File832 Spectrum132350 scans: 15878	33144.7	40776.5	27920	50017.2	10513.3	9116.17	33099.1	59274.7
14	Pavir.Fa02159.1	Pavir.Fa02159.1	10598	37857	531	531	14	14	54.1	188260	1	1	1	845.454	1688.89	2	1688.91	-0.014	0	38.03		29	0.0068	K	EDVFSEIDK	L			File832 Spectrum132341 scans: 15868	29970.7	34276.6	23712.6	46473.4	10451.3	7465.87	27203.1	46314.3
14	Pavir.Fa02159.1	Pavir.Fa02159.1	10598	37857	531	531	14	14	54.1	188264	1	1	1	845.455	1688.9	2	1688.91	-0.0129	0	36.7		29	0.0099	K	EDVFSEIDK	L			File832 Spectrum132664 scans: 16213	26903.4	29484.3	23535.1	42212.6	9360.11	6786.01	25908.3	50316.8
14	Pavir.Fa02159.1	Pavir.Fa02159.1	10598	37857	531	531	14	14	54.1	188293	1	1	1	563.974	1688.9	3	1688.91	-0.0079	0	29.81		29	0.048	K	EDVFSEIDK	L			File831 Spectrum109631 scans: 16632	24566	36724.3	21966	40739.7	9868.32	7595.34	19437.5	43993.6
14	Pavir.Fa02159.1	Pavir.Fa02159.1	10598	37857	531	531	14	14	54.1	14271	1	1	1	511.293	1020.57	2	1020.58	-0.0049	0	46.32		30	0.0012	K	TEIVANA	-			File832 Spectrum126884 scans: 10048	24448.4	14329.5	10866.3	40114.3	22038.2	12762	21001.5	23667.3
14	Pavir.Fa02159.1	Pavir.Fa02159.1	10598	37857	531	531	14	14	54.1	188261	1	1	1	563.972	1688.89	3	1688.91	-0.0136	0	35.2		29	0.014	K	EDVFSEIDK	L			File832 Spectrum132314 scans: 15840	22839	31482	25677.7	40650.7	10301.4	8969.62	19055.4	42805.2
14	Pavir.Fa02159.1	Pavir.Fa02159.1	10598	37857	531	531	14	14	54.1	188263	1	1	1	845.455	1688.9	2	1688.91	-0.0129	0	50.45		29	0.00042	K	EDVFSEIDK	L			File832 Spectrum132686 scans: 16236	16250.7	16022	13776.3	21408.2	6996.67	3973.58	13424.5	27927.6
14	Pavir.Fa02159.1	Pavir.Fa02159.1	10598	37857	531	531	14	14	54.1	14334	1	1	1	511.785	1021.56	2	1021.56	-0.0044	0	45.98	17	29	0.0012	K	TEIVANA	-	Deamidated (NQ)	0.0000010.0	File828 Spectrum29623 scans: 8413	10459.4	14008.2	9497.28	12649.8	6349.92	6277.48	11353.8	13565.8
14	Pavir.Fa02159.1	Pavir.Fa02159.1	10598	37857	531	531	14	14	54.1	14340	1	1	1	511.786	1021.56	2	1021.56	-0.0025	0	46.12	17	27	0.00067	K	TEIVANA	-	Deamidated (NQ)	0.0000010.0	File828 Spectrum29548 scans: 8333	8140.54	10690.3	8709.55	8241.19	8138.65	5411.94	10366.6	11671.1
14	Pavir.Fa02159.1	Pavir.Fa02159.1	10598	37857	531	531	14	14	54.1	420651	1	1	1	1038.57	3112.68	3	3112.68	0.0046	0	56.58	19	30	0.00014	R	LQTYYQNIDSLLSTYEDVIVK	V			File845 Spectrum446000 scans: 27419	5334.87	5210.81	5351.23	5665.04	2908.06	2765.78	4657.31	5615.79	emPAI	46.35	Quantitation summary for protein	113/115	0.811	29	[1.096]		114/115	0.321	29	[1.223]
14	Pavir.Fa02159.1	Pavir.Fa02159.1	10598	37857	531	531	14	14	54.1	420643	1	1	1	1038.57	3112.68	3	3112.68	0.001	0	36.21	15	30	0.015	R	LQTYYQNIDSLLSTYEDVIVK	V			File846 Spectrum470234 scans: 27628	4181.8	4522.14	4995.15	6262.48	3945.03	2735.48	5690.06	5597.86
14	Pavir.Fa02159.1	Pavir.Fa02159.1	10598	37857	531	531	14	14	54.1	420647	1	1	1	1038.57	3112.68	3	3112.68	0.0028	0	59.31	17	30	7.3e-05	R	LQTYYQNIDSLLSTYEDVIVK	V			File845 Spectrum445971 scans: 27388	4141.31	4063.28	3993.02	6592.98	3227.31	1568.5	4851.47	3250.19
14	Pavir.Fa02159.1	Pavir.Fa02159.1	10598	37857	531	531	14	14	54.1	420619	1	1	1	1038.57	3112.68	3	3112.68	-0.0038	0	71.4	19	31	4.6e-06	R	LQTYYQNIDSLLSTYEDVIVK	V			File829 Spectrum73489 scans: 29105	733.912	738.174	799.645	915.471	613.591	443.928	895.789	691.856
14	Pavir.Fa02159.1	Pavir.Fa02159.1	10598	37857	531	531	14	14	54.1	420607	1	1	1	1038.57	3112.67	3	3112.68	-0.0052	0	36.72	18	31	0.014	R	LQTYYQNIDSLLSTYEDVIVK	V			File829 Spectrum73517 scans: 29149	370.14	330.745	309.737	425.866	267.719	214.273	282.917	338.585
15	Pavir.Ib00177.1	Pavir.Ib00177.1	10547	54482	513	513	18	18	47.7	136601	1	1	1	770.897	1539.78	2	1539.78	-0.0047	0	56.37	19	27	6.5e-05	K	GITADDVNGAFR	E	Deamidated (NQ)	0.000000010000.0	File833 Spectrum151855 scans: 11465	1.62141e+06	1.82661e+06	1.66036e+06	1.28897e+06	977698	1.61899e+06	1.41019e+06	1.36779e+06
15	Pavir.Ib00177.1	Pavir.Ib00177.1	10547	54482	513	513	18	18	47.7	191202	1	1	1	567.011	1698.01	3	1698.02	-0.0068	0	42.07		27	0.0018	K	VLDAEFGIVK	G			File842 Spectrum367838 scans: 19485	1.26502e+06	652525	1.20013e+06	909243	1.20096e+06	930217	1.02695e+06	557880
15	Pavir.Ib00177.1	Pavir.Ib00177.1	10547	54482	513	513	18	18	47.7	191207	1	1	1	567.011	1698.01	3	1698.02	-0.006	0	46.41	26	27	0.00066	K	VLDAEFGIVK	G			File842 Spectrum367748 scans: 19389	1.09936e+06	1.00239e+06	1.47055e+06	676249	1.0166e+06	1.3002e+06	1.00859e+06	920232
15	Pavir.Ib00177.1	Pavir.Ib00177.1	10547	54482	513	513	18	18	47.7	136613	1	1	1	770.897	1539.78	2	1539.78	-0.0035	0	60.49	21	27	2.7e-05	K	GITADDVNGAFR	E	Deamidated (NQ)	0.000000010000.0	File834 Spectrum177681 scans: 13465	856718	779442	703574	549656	545122	944123	815859	647459
15	Pavir.Ib00177.1	Pavir.Ib00177.1	10547	54482	513	513	18	18	47.7	191201	1	1	1	567.011	1698.01	3	1698.02	-0.0068	0	43.05		27	0.0014	K	VLDAEFGIVK	G			File842 Spectrum367928 scans: 19581	764678	399840	713973	563152	735196	620552	580259	509222
15	Pavir.Ib00177.1	Pavir.Ib00177.1	10547	54482	513	513	18	18	47.7	136607	1	1	1	770.897	1539.78	2	1539.78	-0.0043	0	44.18	19	27	0.0011	K	GITADDVNGAFR	E	Deamidated (NQ)	0.000000010000.0	File833 Spectrum151945 scans: 11561	564551	431454	530776	392389	301316	559293	517089	509895
15	Pavir.Ib00177.1	Pavir.Ib00177.1	10547	54482	513	513	18	18	47.7	191203	1	1	1	567.011	1698.01	3	1698.02	-0.0066	0	39.93	26	27	0.0029	K	VLDAEFGIVK	G			File842 Spectrum368018 scans: 19677	559690	358113	707443	378138	473910	398740	604601	425585
15	Pavir.Ib00177.1	Pavir.Ib00177.1	10547	54482	513	513	18	18	47.7	191208	1	1	1	567.011	1698.01	3	1698.02	-0.006	0	43.22	26	27	0.0014	K	VLDAEFGIVK	G			File842 Spectrum368063 scans: 19725	398385	308694	280577	431256	249476	381132	341615	308314
15	Pavir.Ib00177.1	Pavir.Ib00177.1	10547	54482	513	513	18	18	47.7	352543	1	1	1	826.074	2475.2	3	2475.2	-0.0025	0	42.21		28	0.0022	K	WPGAATAGSGDPLEDFCK	D	Methylthio (C)	0.000000000000000020.0	File843 Spectrum396251 scans: 24630	264242	272123	40050.3	51194.6	18567.6	30500.8	30064.4	281406
15	Pavir.Ib00177.1	Pavir.Ib00177.1	10547	54482	513	513	18	18	47.7	191212	1	1	1	850.014	1698.01	2	1698.02	-0.0048	0	50.65	24	28	0.00027	K	VLDAEFGIVK	G			File842 Spectrum367677 scans: 19313	209425	129735	206745	131247	172571	193174	168152	109188
15	Pavir.Ib00177.1	Pavir.Ib00177.1	10547	54482	513	513	18	18	47.7	191198	1	1	1	567.011	1698.01	3	1698.02	-0.007	0	44	26	27	0.0011	K	VLDAEFGIVK	G			File842 Spectrum368123 scans: 19789	208516	143649	193227	112712	186596	167520	129942	95072.7
15	Pavir.Ib00177.1	Pavir.Ib00177.1	10547	54482	513	513	18	18	47.7	136621	1	1	1	770.898	1539.78	2	1539.78	-0.0029	0	59.37	21	27	3.6e-05	K	GITADDVNGAFR	E	Deamidated (NQ)	0.000000010000.0	File833 Spectrum152380 scans: 12025	181466	177571	170181	141375	101216	162659	140163	126353
15	Pavir.Ib00177.1	Pavir.Ib00177.1	10547	54482	513	513	18	18	47.7	182361	1	1	1	835.458	1668.9	2	1668.9	0.0008	0	30.27		28	0.037	K	YDSMLGTFK	A			File843 Spectrum388589 scans: 16457	170469	118939	151129	128422	147509	141855	142197	103706
15	Pavir.Ib00177.1	Pavir.Ib00177.1	10547	54482	513	513	18	18	47.7	182350	1	1	1	835.457	1668.9	2	1668.9	-0.001	0	33.66		28	0.017	K	YDSMLGTFK	A			File843 Spectrum388617 scans: 16487	156323	115890	139316	108566	149063	148628	132069	93637.7
15	Pavir.Ib00177.1	Pavir.Ib00177.1	10547	54482	513	513	18	18	47.7	136614	1	1	1	770.898	1539.78	2	1539.78	-0.0032	0	59.3	21	27	3.7e-05	K	GITADDVNGAFR	E	Deamidated (NQ)	0.000000010000.0	File834 Spectrum177593 scans: 13371	141439	144204	117386	113906	86728.3	141482	122654	116374
15	Pavir.Ib00177.1	Pavir.Ib00177.1	10547	54482	513	513	18	18	47.7	186953	1	1	1	843.454	1684.89	2	1684.9	-0.0019	0	40.58		29	0.0037	K	YDSMLGTFK	A	Oxidation (M)	0.000300000.0	File839 Spectrum292443 scans: 12416	118745	91479.4	96647.7	76021	91495.4	87501.9	71269.7	55317.1
15	Pavir.Ib00177.1	Pavir.Ib00177.1	10547	54482	513	513	18	18	47.7	136623	1	1	1	770.898	1539.78	2	1539.78	-0.0026	0	53.58	16	28	0.00014	K	GITADDVNGAFR	E	Deamidated (NQ)	0.000000010000.0	File835 Spectrum203354 scans: 13478	103655	117072	99871.5	66827.2	70566.1	112300	101927	84769.5
15	Pavir.Ib00177.1	Pavir.Ib00177.1	10547	54482	513	513	18	18	47.7	136624	1	1	1	770.898	1539.78	2	1539.78	-0.0026	0	58.91	22	28	4.1e-05	K	GITADDVNGAFR	E	Deamidated (NQ)	0.000000010000.0	File833 Spectrum151766 scans: 11370	99967.8	117835	100134	83843.5	61468.7	107739	91006.9	80744.6
15	Pavir.Ib00177.1	Pavir.Ib00177.1	10547	54482	513	513	18	18	47.7	136629	1	1	1	770.898	1539.78	2	1539.78	-0.0014	0	39.83	20	27	0.0031	K	GITADDVNGAFR	E	Deamidated (NQ)	0.000000010000.0	File832 Spectrum128113 scans: 11359	95633.6	96245.4	83263.7	72803.6	61279	101750	75138.4	70710.4
15	Pavir.Ib00177.1	Pavir.Ib00177.1	10547	54482	513	513	18	18	47.7	182380	1	1	1	835.459	1668.9	2	1668.9	0.0022	0	50.01		29	0.0004	K	YDSMLGTFK	A			File843 Spectrum388692 scans: 16567	91695.9	54735.8	81591.5	59120.2	75154	79678.9	69957.9	64039.6
15	Pavir.Ib00177.1	Pavir.Ib00177.1	10547	54482	513	513	18	18	47.7	136617	1	1	1	770.898	1539.78	2	1539.78	-0.0031	0	47.19	17	27	0.0006	K	GITADDVNGAFR	E	Deamidated (NQ)	0.000000010000.0	File834 Spectrum177775 scans: 13565	87063.1	87006.4	76935.2	68022.2	52765.9	85073.8	74149.9	76405.8
15	Pavir.Ib00177.1	Pavir.Ib00177.1	10547	54482	513	513	18	18	47.7	191205	1	1	1	567.011	1698.01	3	1698.02	-0.0064	0	41.99	24	27	0.0018	K	VLDAEFGIVK	G			File842 Spectrum367658 scans: 19293	83043.9	75968.9	93788.4	66773	81089.2	105167	77640.1	75228.6
15	Pavir.Ib00177.1	Pavir.Ib00177.1	10547	54482	513	513	18	18	47.7	315042	1	1	1	1111.63	2221.24	2	2221.24	-0.0022	0	46.44		30	0.0012	K	DSPLDVVVINDSGGVK	N			File839 Spectrum297991 scans: 18334	75602.5	72068.8	110482	84508	114008	139936	93704.9	65183.1
15	Pavir.Ib00177.1	Pavir.Ib00177.1	10547	54482	513	513	18	18	47.7	186959	1	1	1	843.455	1684.89	2	1684.9	-0.0009	0	43.16		29	0.0021	K	YDSMLGTFK	A	Oxidation (M)	0.000300000.0	File839 Spectrum292329 scans: 12294	67144.8	54673.9	64900.8	60192.7	59737.7	59002	43067.9	35461.7
15	Pavir.Ib00177.1	Pavir.Ib00177.1	10547	54482	513	513	18	18	47.7	136643	1	1	1	770.903	1539.79	2	1539.78	0.0069	0	31.87	18	27	0.02	K	GITADDVNGAFR	E	Deamidated (NQ)	0.000000010000.0	File832 Spectrum128044 scans: 11285	55709.5	61804.6	55251.4	45825	50205.3	76302.2	48234.2	48298.7
15	Pavir.Ib00177.1	Pavir.Ib00177.1	10547	54482	513	513	18	18	47.7	191214	1	1	1	850.014	1698.01	2	1698.02	-0.0046	0	58.5	19	27	3.9e-05	K	VLDAEFGIVK	G			File842 Spectrum368171 scans: 19840	52250.3	32434.8	54421.6	43165.4	46610.8	48145.3	37840.6	33959.4
15	Pavir.Ib00177.1	Pavir.Ib00177.1	10547	54482	513	513	18	18	47.7	191222	1	1	1	567.013	1698.02	3	1698.02	-0.0017	0	35.04	15	27	0.0085	K	VLDAEFGIVK	G			File843 Spectrum391378 scans: 19432	50774.8	33637.6	52545.1	30694.7	44051.2	50800.8	43758.4	22770.4
15	Pavir.Ib00177.1	Pavir.Ib00177.1	10547	54482	513	513	18	18	47.7	136637	1	1	1	770.899	1539.78	2	1539.78	0.0002	0	49.97		28	0.00032	K	GITADDVNGAFR	E	Deamidated (NQ)	0.000000010000.0	File835 Spectrum203313 scans: 13434	50399.1	60792.1	62881.6	43911	36846.1	56281.5	54932.7	46583.4
15	Pavir.Ib00177.1	Pavir.Ib00177.1	10547	54482	513	513	18	18	47.7	136622	1	1	1	770.898	1539.78	2	1539.78	-0.0026	0	58.08	20	28	4.9e-05	K	GITADDVNGAFR	E	Deamidated (NQ)	0.000000010000.0	File833 Spectrum152486 scans: 12138	48212.7	51965.4	38982.9	36062.1	30738	46447.8	37003.9	36044.7
15	Pavir.Ib00177.1	Pavir.Ib00177.1	10547	54482	513	513	18	18	47.7	191213	1	1	1	567.012	1698.01	3	1698.02	-0.0048	0	38.18	16	27	0.0042	K	VLDAEFGIVK	G			File842 Spectrum368199 scans: 19870	47060.2	49494.7	60501.5	41809.5	48850.6	51619.5	51622.4	25898.4
[truncated: 49,006 more rows]
[truncated: 26 more columns]

## Sheet: S2-2_ProteominerTreated
Supplemental Table S2-2. The abundance value of peptides detected from the ProteoMiner treated leaves in switchgrass
[truncated: 33,282 more rows]

## Sheet: ComP
																														113(Ctr1)	115(Ctr2)	117(Ctr3)	118(Ctr4)	114(Tr1)	116(Tr2)	119(Tr3)	121(Tr4)
[truncated: 16 more rows]
