# Supplementary material for: Drought-Induced Leaf Proteome Changes in Switchgrass Seedlings
Source: Int J Mol Sci. 2016 Aug 2;17(8):1251. doi: 10.3390/ijms17081251 (PMC5000649; doi:10.3390/ijms17081251)
Supplement: Supplementary file 1 [file ijms-17-01251-s001.zip › Supplemental Table S3.xlsx]

## Sheet: Supplemental Table S3-1
Supplemental Table S3-1. The abundance value of peptides detected from significant expressed proteins in the crude leaves extracts of switchgrass
prot_hit_num	prot_acc	prot_desc	prot_score	prot_mass	prot_matches	prot_matches_sig	prot_sequences	prot_sequences_sig	prot_cover	pep_query	pep_rank	pep_isbold	pep_isunique	pep_exp_mz	pep_exp_mr	pep_exp_z	pep_calc_mr	pep_delta	pep_miss	pep_score	pep_homol	pep_ident	pep_expect	pep_res_before	pep_seq	pep_res_after	pep_var_mod	pep_var_mod_pos	pep_scan_title	Raw data								Log2 transformation of the raw data								mean of control	Log2 fold change
																														113 (Ctr1)	115(Ctr3)	117(Ctr3)	118(Ctr4)	114(Tr1)	116(Tr2)	119(Tr3)	121(Tr4)	113 (Ctr1)	115(Ctr3)	117(Ctr3)	118(Ctr4)	114(Tr1)	116(Tr2)	119(Tr3)	121(Tr4)		113 (Ctr1)	115(Ctr3)	117(Ctr3)
197	Pavir.J13866.1	Pavir.J13866.1	2642	41595	68	68	10	10	50.3	303309	1	1	1	718.746	2153.22	3	2153.22	0.0013	0	88.89	19	30	6.5e-08	K	GATTIIGGGDSVAAVEK	A			File839 Spectrum292981 scans: 12990	35579.1	54814.9	36971.6	35409.9	91181.4	127532	48895.8	56550.3	15.1187	15.7423	15.1741	15.1119	16.4765	16.9605	15.5774	15.7872	15.2868	-0.168013	0.455526	-0.112625
197	Pavir.J13866.1	Pavir.J13866.1	2642	41595	68	68	10	10	50.3	433625	1	1	1	829.48	3313.89	4	3313.89	0.0024	1	37.05	18	26	0.0045	K	GVSLLLPTDVVVADKFEANAESK	I			File827 Spectrum19938 scans: 24402	27537.7	11916.1	21415.3	18909	71965.8	65355.4	29924.3	24833.3	14.7491	13.5406	14.3864	14.2068	16.135	15.996	14.869	14.6	14.2207	0.5284	-0.680095	0.165632
197	Pavir.J13866.1	Pavir.J13866.1	2642	41595	68	68	10	10	50.3	303296	1	1	1	718.745	2153.21	3	2153.22	-0.002	0	79.79	19	30	5.5e-07	K	GATTIIGGGDSVAAVEK	A			File838 Spectrum271583 scans: 13545	25266.9	27399.4	17337	21826.2	44523.9	51681.2	33374.2	32378.5	14.625	14.7419	14.0816	14.4138	15.4423	15.6574	15.0264	14.9828	14.4655	0.159423	0.276318	-0.383973
197	Pavir.J13866.1	Pavir.J13866.1	2642	41595	68	68	10	10	50.3	303312	1	1	1	1077.62	2153.22	2	2153.22	0.0023	0	88.08		29	7.7e-08	K	GATTIIGGGDSVAAVEK	A			File839 Spectrum293066 scans: 13080	15476.6	10001.1	12246	9315.93	39046	42582.9	17181.6	17624.3	13.9178	13.2879	13.58	13.1855	15.2529	15.378	14.0686	14.1053	13.4928	0.42501	-0.204928	0.0872262
197	Pavir.J13866.1	Pavir.J13866.1	2642	41595	68	68	10	10	50.3	303320	1	1	1	718.747	2153.22	3	2153.22	0.0052	0	57.55	19	29	8.7e-05	K	GATTIIGGGDSVAAVEK	A			File839 Spectrum292957 scans: 12964	12809.4	17017.1	13111.3	15734	26595.6	28149.5	16629.7	28387.3	13.6449	14.0547	13.6785	13.9416	14.6989	14.7808	14.0215	14.793	13.8299	-0.185017	0.224764	-0.151412
197	Pavir.J13866.1	Pavir.J13866.1	2642	41595	68	68	10	10	50.3	303313	1	1	1	1077.62	2153.22	2	2153.22	0.0025	0	85.94		29	1.3e-07	K	GATTIIGGGDSVAAVEK	A			File839 Spectrum293005 scans: 13015	8790.27	6348.28	8809.1	7779.05	25046.9	30352.7	10961.7	10505.1	13.1017	12.6322	13.1048	12.9254	14.6123	14.8895	13.4202	13.3588	12.941	0.160692	-0.308849	0.163778
197	Pavir.J13866.1	Pavir.J13866.1	2642	41595	68	68	10	10	50.3	303302	1	1	1	718.746	2153.22	3	2153.22	-0.0001	0	61.98	17	30	3.4e-05	K	GATTIIGGGDSVAAVEK	A			File838 Spectrum271648 scans: 13614	8240.7	8997.69	7893.62	10041.9	16809.5	16894.2	9152.76	12612.8	13.0086	13.1353	12.9465	13.2937	14.037	14.0442	13.16	13.6226	13.096	-0.0874743	0.039313	-0.149555
197	Pavir.J13866.1	Pavir.J13866.1	2642	41595	68	68	10	10	50.3	303294	1	1	1	718.745	2153.21	3	2153.22	-0.0036	0	35.94	16	30	0.013	K	GATTIIGGGDSVAAVEK	A			File839 Spectrum293154 scans: 13174	6994.19	9123.39	8035.5	6052.31	15496	15584.6	8683.77	10561.1	12.7719	13.1554	12.9722	12.5633	13.9196	13.9278	13.0841	13.3665	12.8657	-0.0937428	0.28967	0.106488
208	Pavir.Ia03665.1	Pavir.Ia03665.1	2548	88456	121	121	13	13	26.4	425477	1	0	1	1061.56	3181.67	3	3181.67	-0.0056	0	72.53	18	31	4.4e-06	K	SINPDEAVAYGAAVQAAILSGEGNQK	V	Deamidated (NQ)	0.00000000000000000000000010.0	File846 Spectrum469352 scans: 26688	9729.03	4727.26	9427.31	6411.38	33875.3	19344.7	8260.5	10236	13.2481	12.2068	13.2026	12.6464	15.0479	14.2396	13.012	13.3214	12.826	0.4221	-0.619192	0.376651
208	Pavir.Ia03665.1	Pavir.Ia03665.1	2548	88456	121	121	13	13	26.4	425483	1	0	1	1061.56	3181.67	3	3181.67	-0.003	0	78.75		31	1e-06	K	SINPDEAVAYGAAVQAAILSGEGNQK	V	Deamidated (NQ)	0.00000000000000000000000010.0	File846 Spectrum469237 scans: 26565	7096.47	4918.74	13572	5740.58	29862.1	21070.7	12730.4	7388.32	12.7929	12.2641	13.7284	12.487	14.866	14.363	13.636	12.851	12.8181	-0.025187	-0.554	0.910279
208	Pavir.Ia03665.1	Pavir.Ia03665.1	2548	88456	121	121	13	13	26.4	425476	1	0	1	1061.56	3181.66	3	3181.67	-0.0165	0	68.67	20	31	1e-05	K	SINPDEAVAYGAAVQAAILSGEGNQK	V	Deamidated (NQ)	0.00000000000000000000000010.0	File845 Spectrum444685 scans: 26016	3421.78	0.781931	5878.75	3658.82	14495	8043.72	3852.46	2704.19	11.7405	-0.354887	12.5213	11.8372	13.8233	12.9736	11.9116	11.401	8.93603	2.80451	-9.29091	3.58527
208	Pavir.Ia03665.1	Pavir.Ia03665.1	2548	88456	121	121	13	13	26.4	425489	1	0	1	1061.57	3181.67	3	3181.67	0.0029	0	60.65	17	31	6.6e-05	K	SINPDEAVAYGAAVQAAILSGEGNQK	V	Deamidated (NQ)	0.00000000000000000000000010.0	File845 Spectrum444711 scans: 26044	3421.65	1180.44	3704.09	2583.58	13807	8412.75	4400.03	3126.86	11.7405	10.2051	11.8549	11.3352	13.7531	13.0384	12.1033	11.6105	11.2839	0.456566	-1.07881	0.570994
208	Pavir.Ia03665.1	Pavir.Ia03665.1	2548	88456	121	121	13	13	26.4	264286	1	1	1	657.368	1969.08	3	1969.08	-0.0011	0	39.37	23	30	0.0063	K	ELEGICNPIISK	M	Methylthio (C)	0.000002000000.0	File846 Spectrum465316 scans: 22382	1753.69	2309.28	2429	1647.27	10432.9	9052.08	3845.55	2510.23	10.7762	11.1732	11.2461	10.6859	13.3489	13.144	11.909	11.2936	10.9704	-0.194177	0.202874	0.275794
208	Pavir.Ia03665.1	Pavir.Ia03665.1	2548	88456	121	121	13	13	26.4	425603	1	0	1	1061.9	3182.67	3	3182.66	0.0131	0	57.93		31	0.00012	K	SINPDEAVAYGAAVQAAILSGEGNQK	V	2 Deamidated (NQ)	0.00000000000000100000000010.0	File845 Spectrum444835 scans: 26176	1422.07	953.746	2379.36	1562.1	4482.44	3230.58	2485.38	1485.51	10.4738	9.89746	11.2164	10.6093	12.1301	11.6576	11.2793	10.5367	10.5492	-0.075442	-0.651755	0.667142
208	Pavir.Ia03665.1	Pavir.Ia03665.1	2548	88456	121	121	13	13	26.4	425392	1	1	1	1061.24	3180.69	3	3180.69	0.0014	0	74.42	22	31	2.8e-06	K	SINPDEAVAYGAAVQAAILSGEGNQK	V			File827 Spectrum21987 scans: 26587	804.043	1168.05	1292.85	1279.95	11011.7	6798.96	4830.01	1805.04	9.65113	10.1899	10.3363	10.3219	13.4268	12.7311	12.2378	10.8178	10.1248	-0.473678	0.065081	0.211532
224	Pavir.Aa01363.1	Pavir.Aa01363.1	2428	26889	83	83	9	9	55.3	270979	1	1	1	1000.02	1998.02	2	1998.02	-0.0011	0	61.31		29	3.6e-05	K	TSIDEEVYNQLVER	A			File835 Spectrum208949 scans: 19446	85194.1	109246	110347	111533	259348	255330	165232	211896	16.3785	16.7372	16.7517	16.7671	17.9845	17.962	17.3341	17.693	16.6586	-0.280155	0.0786042	0.0930639
224	Pavir.Aa01363.1	Pavir.Aa01363.1	2428	26889	83	83	9	9	55.3	127181	1	1	1	504.608	1510.8	3	1510.81	-0.0053	0	36.28	15	28	0.0076	K	ADPASDEAK	L			File845 Spectrum423768 scans: 3696	69060.3	55627.4	58530.2	62779.1	187122	126048	116874	113123	16.0756	15.7635	15.8369	15.938	17.5136	16.9436	16.8346	16.7875	15.9035	0.172077	-0.139984	-0.066599
224	Pavir.Aa01363.1	Pavir.Aa01363.1	2428	26889	83	83	9	9	55.3	270986	1	1	1	1000.02	1998.02	2	1998.02	0.0012	0	58.47		29	7e-05	K	TSIDEEVYNQLVER	A			File836 Spectrum233305 scans: 20045	25075.1	36665	39812.8	33701.9	66390.8	73310.6	49647	61158.2	14.614	15.1621	15.2809	15.0405	16.0187	16.1617	15.5994	15.9003	15.0244	-0.410425	0.137724	0.256552
224	Pavir.Aa01363.1	Pavir.Aa01363.1	2428	26889	83	83	9	9	55.3	127176	1	1	1	504.608	1510.8	3	1510.81	-0.0056	0	34	16	28	0.013	K	ADPASDEAK	L			File844 Spectrum400001 scans: 3587	24082.3	21070.6	26504.1	29642	55945	52062.4	39003.3	53568.1	14.5557	14.3629	14.6939	14.8554	15.7717	15.668	15.2513	15.7091	14.617	-0.0612928	-0.254032	0.0769503
224	Pavir.Aa01363.1	Pavir.Aa01363.1	2428	26889	83	83	9	9	55.3	127179	1	1	1	504.608	1510.8	3	1510.81	-0.0055	0	48.07	17	28	0.0005	K	ADPASDEAK	L			File844 Spectrum400018 scans: 3609	22343.5	17588.7	30903.3	32239	80654.2	83102.7	60362.7	65721.3	14.4476	14.1024	14.9155	14.9765	16.2995	16.3426	15.8814	16.0041	14.6105	-0.162911	-0.50812	0.304993
224	Pavir.Aa01363.1	Pavir.Aa01363.1	2428	26889	83	83	9	9	55.3	127180	1	1	1	504.608	1510.8	3	1510.81	-0.0054	0	34.1	15	28	0.013	K	ADPASDEAK	L			File844 Spectrum400028 scans: 3622	21694.7	24219.1	30947.1	26021.1	71670.2	59778.3	44595.9	66775.2	14.4051	14.5639	14.9175	14.6674	16.1291	15.8673	15.4446	16.027	14.6385	-0.233402	-0.0745968	0.27906
224	Pavir.Aa01363.1	Pavir.Aa01363.1	2428	26889	83	83	9	9	55.3	271171	1	1	1	1000.51	1999.01	2	1999.01	0.0006	0	80.04		28	3.9e-07	K	TSIDEEVYNQLVER	A	Deamidated (NQ)	0.00000000100000.0	File828 Spectrum34274 scans: 13375	19689.8	22716	17279.9	20940.2	40748.6	45136.8	28982.9	39755.7	14.2652	14.4714	14.0768	14.354	15.3145	15.462	14.8229	15.2789	14.2918	-0.0266854	0.179577	-0.215033
224	Pavir.Aa01363.1	Pavir.Aa01363.1	2428	26889	83	83	9	9	55.3	270981	1	1	1	1000.02	1998.02	2	1998.02	-0.0009	0	72.1		29	3e-06	K	TSIDEEVYNQLVER	A			File835 Spectrum209195 scans: 19708	19015.3	24977.6	19338.9	29501.6	49456.1	46044.2	31674	41314	14.2149	14.6083	14.2392	14.8485	15.5939	15.4907	14.951	15.3343	14.4777	-0.262865	0.130612	-0.238517
224	Pavir.Aa01363.1	Pavir.Aa01363.1	2428	26889	83	83	9	9	55.3	270977	1	1	1	667.014	1998.02	3	1998.02	-0.0013	0	71.39		29	3.6e-06	K	TSIDEEVYNQLVER	A			File835 Spectrum209190 scans: 19703	18658.3	12345.4	16621.7	8372.58	29287.9	24416.5	8785.78	23005.8	14.1875	13.5917	14.0208	13.0315	14.838	14.5756	13.101	14.4897	13.7079	0.479669	-0.116174	0.312913
224	Pavir.Aa01363.1	Pavir.Aa01363.1	2428	26889	83	83	9	9	55.3	127177	1	1	1	504.608	1510.8	3	1510.81	-0.0056	0	44.31	17	28	0.0012	K	ADPASDEAK	L			File844 Spectrum399994 scans: 3577	15398.4	11854.8	17509.2	16474.5	37127.1	36017.9	22787	28858.2	13.9105	13.5332	14.0958	14.0079	15.1802	15.1364	14.4759	14.8167	13.8869	0.0236274	-0.353677	0.208962
224	Pavir.Aa01363.1	Pavir.Aa01363.1	2428	26889	83	83	9	9	55.3	271169	1	1	1	1000.51	1999	2	1999.01	-0.0005	0	66.47		28	8.7e-06	K	TSIDEEVYNQLVER	A	Deamidated (NQ)	0.00000000100000.0	File828 Spectrum34265 scans: 13365	14552.6	15795.4	16177.8	13531	31495.1	35243.9	21672.6	36134.4	13.829	13.9472	13.9817	13.724	14.9428	15.1051	14.4036	15.1411	13.8705	-0.0414865	0.0767375	0.111245
224	Pavir.Aa01363.1	Pavir.Aa01363.1	2428	26889	83	83	9	9	55.3	403705	1	1	1	973.843	2918.51	3	2918.51	-0.0051	0	86.98	26	31	1.4e-07	R	ATYALQEDGATVDVLNETWSK	G			File837 Spectrum256477 scans: 21204	13787.8	10062.8	14800.7	13317.1	29511.2	29696.9	24360.6	30113.8	13.7511	13.2967	13.8534	13.701	14.849	14.858	14.5723	14.8781	13.6506	0.10055	-0.353813	0.202822
224	Pavir.Aa01363.1	Pavir.Aa01363.1	2428	26889	83	83	9	9	55.3	127171	1	1	1	504.608	1510.8	3	1510.81	-0.0065	0	37.84	16	28	0.0053	K	ADPASDEAK	L			File844 Spectrum400044 scans: 3644	12277.1	9606.97	9999.28	9200.78	32604.4	28671.1	23399.8	21402.6	13.5837	13.2299	13.2876	13.1675	14.9928	14.8073	14.5142	14.3855	13.3172	0.266509	-0.0873087	-0.0295658
224	Pavir.Aa01363.1	Pavir.Aa01363.1	2428	26889	83	83	9	9	55.3	403700	1	1	1	973.842	2918.51	3	2918.51	-0.0065	0	80.46	23	31	6.1e-07	R	ATYALQEDGATVDVLNETWSK	G			File837 Spectrum256687 scans: 21428	11829.1	9176.17	11613.9	9428.07	26881.7	24969.9	18283.5	18913.6	13.53	13.1637	13.5036	13.2027	14.7143	14.6079	14.1583	14.2071	13.35	0.180039	-0.186334	0.153559
224	Pavir.Aa01363.1	Pavir.Aa01363.1	2428	26889	83	83	9	9	55.3	403703	1	1	1	973.843	2918.51	3	2918.51	-0.0058	0	83.22	22	31	3.2e-07	R	ATYALQEDGATVDVLNETWSK	G			File840 Spectrum323651 scans: 21807	11800.7	15694.9	13009.8	15428.6	27820.2	25066.6	21109	28499.4	13.5266	13.938	13.6673	13.9133	14.7638	14.6135	14.3656	14.7986	13.7613	-0.234728	0.176704	-0.0939924
224	Pavir.Aa01363.1	Pavir.Aa01363.1	2428	26889	83	83	9	9	55.3	403807	1	1	1	974.172	2919.49	3	2919.5	-0.0029	0	70.99	18	31	5.3e-06	R	ATYALQEDGATVDVLNETWSK	G	Deamidated (NQ)	0.000000000000000100000.0	File836 Spectrum234221 scans: 21022	11630.9	14819.8	14474.4	10231.1	23349.7	16689.5	18004.4	24721.2	13.5057	13.8552	13.8212	13.3207	14.5111	14.0267	14.1361	14.5935	13.6257	-0.120025	0.229536	0.195516
224	Pavir.Aa01363.1	Pavir.Aa01363.1	2428	26889	83	83	9	9	55.3	270984	1	1	1	1000.02	1998.02	2	1998.02	0.0001	0	59.44		29	5.5e-05	K	TSIDEEVYNQLVER	A			File835 Spectrum208909 scans: 19403	11581.3	17237.4	15562.5	18469.9	32492.4	33761.6	23871.3	27299.8	13.4995	14.0733	13.9258	14.1729	14.9878	15.0431	14.543	14.7366	13.9179	-0.41835	0.155396	0.00792806
224	Pavir.Aa01363.1	Pavir.Aa01363.1	2428	26889	83	83	9	9	55.3	403808	1	1	1	974.172	2919.49	3	2919.5	-0.0029	0	72.64	20	31	3.7e-06	R	ATYALQEDGATVDVLNETWSK	G	Deamidated (NQ)	0.000000000000000100000.0	File836 Spectrum234189 scans: 20988	10558.5	10949.2	15129	16023.7	32168.7	27297	21912.4	29373.9	13.3661	13.4185	13.885	13.9679	14.9734	14.7365	14.4195	14.8422	13.6594	-0.293283	-0.24087	0.225631
224	Pavir.Aa01363.1	Pavir.Aa01363.1	2428	26889	83	83	9	9	55.3	270982	1	1	1	667.014	1998.02	3	1998.02	-0.0008	0	67.67		29	8.3e-06	K	TSIDEEVYNQLVER	A			File835 Spectrum208919 scans: 19414	10271.6	13326.9	14067.4	6369.59	21787.9	20833	16895.2	24967.8	13.3264	13.7021	13.7801	12.637	14.4112	14.3466	14.0443	14.6078	13.3614	-0.0349949	0.340684	0.418695
224	Pavir.Aa01363.1	Pavir.Aa01363.1	2428	26889	83	83	9	9	55.3	403715	1	1	1	973.846	2918.51	3	2918.51	0.0024	0	40.77	27	31	0.0057	R	ATYALQEDGATVDVLNETWSK	G			File837 Spectrum255328 scans: 19978	9993.43	9462.72	9445.86	11563.1	20525.6	21909.3	12624.4	12814.6	13.2868	13.208	13.2055	13.4972	14.3251	14.4193	13.6239	13.6455	13.2994	-0.0126145	-0.0913397	-0.093913
224	Pavir.Aa01363.1	Pavir.Aa01363.1	2428	26889	83	83	9	9	55.3	403717	1	1	1	973.846	2918.52	3	2918.51	0.0039	0	64.95	21	31	2.2e-05	R	ATYALQEDGATVDVLNETWSK	G			File839 Spectrum301546 scans: 22126	9761.71	6383.05	11178.3	12013.9	27483.3	30876.7	18087.2	21268	13.2529	12.64	13.4484	13.5524	14.7463	14.9142	14.1427	14.3764	13.2234	0.0294719	-0.583417	0.224971
224	Pavir.Aa01363.1	Pavir.Aa01363.1	2428	26889	83	83	9	9	55.3	271179	1	1	1	1000.51	1999.01	2	1999.01	0.0059	0	70.01		29	4.1e-06	K	TSIDEEVYNQLVER	A	Deamidated (NQ)	0.00000000100000.0	File828 Spectrum34253 scans: 13352	9694.75	11491.4	11358.2	12507.6	23392.7	20446.2	17024.9	20886.9	13.243	13.4883	13.4714	13.6105	14.5138	14.3195	14.0554	14.3503	13.4533	-0.210314	0.0349623	0.0181404
224	Pavir.Aa01363.1	Pavir.Aa01363.1	2428	26889	83	83	9	9	55.3	271174	1	1	1	1000.51	1999.01	2	1999.01	0.0029	0	59.1		29	4.9e-05	K	TSIDEEVYNQLVER	A	Deamidated (NQ)	0.00000000100000.0	File831 Spectrum113697 scans: 20969	9090.74	12750.2	11013.8	14498.7	23398.6	28228.9	16860.1	23779.4	13.1502	13.6382	13.427	13.8236	14.5141	14.7849	14.0413	14.5374	13.5098	-0.359584	0.128463	-0.082747
224	Pavir.Aa01363.1	Pavir.Aa01363.1	2428	26889	83	83	9	9	55.3	403803	1	1	1	974.171	2919.49	3	2919.5	-0.0043	0	86.79	19	31	1.4e-07	R	ATYALQEDGATVDVLNETWSK	G	Deamidated (NQ)	0.000000000000000100000.0	File836 Spectrum236381 scans: 23331	8589.37	8864.98	12872.1	11184.4	27209.4	25804.8	16680.7	18521.2	13.0683	13.1139	13.652	13.4492	14.7318	14.6554	14.0259	14.1769	13.3208	-0.252512	-0.206948	0.331113
224	Pavir.Aa01363.1	Pavir.Aa01363.1	2428	26889	83	83	9	9	55.3	403809	1	1	1	974.172	2919.49	3	2919.5	-0.0016	0	81.33	18	31	5e-07	R	ATYALQEDGATVDVLNETWSK	G	Deamidated (NQ)	0.000000000000000100000.0	File836 Spectrum234162 scans: 20959	8328.51	8409.63	8895.61	9250.61	16336.2	14879.3	13605.9	16166.9	13.0238	13.0378	13.1189	13.1753	13.9958	13.861	13.7319	13.9808	13.089	-0.0651276	-0.0511435	0.0299083
224	Pavir.Aa01363.1	Pavir.Aa01363.1	2428	26889	83	83	9	9	55.3	271166	1	1	1	1000.51	1999	2	1999.01	-0.0006	0	49.02		28	0.00048	K	TSIDEEVYNQLVER	A	Deamidated (NQ)	0.00000000100000.0	File831 Spectrum113682 scans: 20953	7852.08	9716.18	9346.24	11627	20971.4	20689.5	13295.8	18364.3	12.9389	13.2462	13.1902	13.5052	14.3561	14.3366	13.6987	14.1646	13.2201	-0.28124	0.0260734	-0.0299284
224	Pavir.Aa01363.1	Pavir.Aa01363.1	2428	26889	83	83	9	9	55.3	127182	1	1	1	504.608	1510.8	3	1510.81	-0.0051	0	41.61	17	28	0.0022	K	ADPASDEAK	L			File845 Spectrum423816 scans: 3749	7608.46	4785.43	8533.09	8868.11	26856.2	22262.9	14566.3	17624.3	12.8934	12.2244	13.0589	13.1144	14.713	14.4424	13.8303	14.1053	12.8228	0.0706169	-0.598337	0.236081
224	Pavir.Aa01363.1	Pavir.Aa01363.1	2428	26889	83	83	9	9	55.3	403696	1	1	1	973.841	2918.5	3	2918.51	-0.012	0	76.18	20	31	1.6e-06	R	ATYALQEDGATVDVLNETWSK	G			File840 Spectrum323601 scans: 21753	7317.71	7799.44	8949.81	9335.24	17073.1	15631.4	12058.7	15090.6	12.8372	12.9292	13.1276	13.1885	14.0594	13.9322	13.5578	13.8814	13.0206	-0.183434	-0.0914562	0.10703
224	Pavir.Aa01363.1	Pavir.Aa01363.1	2428	26889	83	83	9	9	55.3	271168	1	1	1	667.342	1999	3	1999.01	-0.0006	0	29.55		28	0.043	K	TSIDEEVYNQLVER	A	Deamidated (NQ)	0.00000000100000.0	File829 Spectrum61332 scans: 16135	6952.69	11135.1	9503.35	8779.45	7966.25	9955.97	9198.38	10782	12.7634	13.4428	13.2142	13.0999	12.9597	13.2813	13.1672	13.3963	13.1301	-0.366722	0.312745	0.0841416
224	Pavir.Aa01363.1	Pavir.Aa01363.1	2428	26889	83	83	9	9	55.3	270989	1	1	1	1000.02	1998.02	2	1998.02	0.0027	0	72.91		29	2.5e-06	K	TSIDEEVYNQLVER	A			File835 Spectrum209229 scans: 19744	6217.9	7555.24	5577.06	6052.22	15602.4	13643.8	10338.7	11760.8	12.6022	12.8833	12.4453	12.5632	13.9295	13.736	13.3358	13.5217	12.6235	-0.0212909	0.259759	-0.178215
224	Pavir.Aa01363.1	Pavir.Aa01363.1	2428	26889	83	83	9	9	55.3	403814	1	1	1	974.173	2919.5	3	2919.5	0.0023	0	38.67		31	0.0091	R	ATYALQEDGATVDVLNETWSK	G	Deamidated (NQ)	0.000000000000000100000.0	File837 Spectrum254806 scans: 19421	6153.31	3647.67	5861.98	5449.63	11366	9580.22	7401.16	8065.49	12.5871	11.8328	12.5172	12.4119	13.4724	13.2258	12.8535	12.9775	12.3373	0.249892	-0.504496	0.179916
224	Pavir.Aa01363.1	Pavir.Aa01363.1	2428	26889	83	83	9	9	55.3	270972	1	1	1	1000.02	1998.02	2	1998.02	-0.0028	0	39.92		29	0.005	K	TSIDEEVYNQLVER	A			File836 Spectrum233429 scans: 20177	6081.06	7351.28	7850.23	7673.57	13235.6	13514.8	9785.99	10943.5	12.5701	12.8438	12.9385	12.9057	13.6921	13.7223	13.2565	13.4178	12.8145	-0.244415	0.0292572	0.123997
224	Pavir.Aa01363.1	Pavir.Aa01363.1	2428	26889	83	83	9	9	55.3	403810	1	1	1	974.172	2919.5	3	2919.5	-0.001	0	72.27	18	31	4e-06	R	ATYALQEDGATVDVLNETWSK	G	Deamidated (NQ)	0.000000000000000100000.0	File836 Spectrum233954 scans: 20737	5268.19	3032.07	6121.87	3359.28	8610.24	9708.13	8657.85	6500.37	12.3631	11.5661	12.5798	11.7139	13.0718	13.245	13.0798	12.6663	12.0557	0.307374	-0.489632	0.524039
224	Pavir.Aa01363.1	Pavir.Aa01363.1	2428	26889	83	83	9	9	55.3	403815	1	1	1	974.174	2919.5	3	2919.5	0.0037	0	73.5		31	3e-06	R	ATYALQEDGATVDVLNETWSK	G	Deamidated (NQ)	0.000000000000000100000.0	File836 Spectrum236529 scans: 23489	5014	3925.38	3966	4485.88	10477.4	9055.53	6155.51	7143.91	12.2917	11.9386	11.9535	12.1312	13.355	13.1446	12.5877	12.8025	12.0788	0.212995	-0.140135	-0.125285
224	Pavir.Aa01363.1	Pavir.Aa01363.1	2428	26889	83	83	9	9	55.3	403812	1	1	1	974.173	2919.5	3	2919.5	0.0015	0	35.88	19	31	0.018	R	ATYALQEDGATVDVLNETWSK	G	Deamidated (NQ)	0.000000000000000100000.0	File837 Spectrum254788 scans: 19402	4976.15	3626.88	7834.34	5017.55	11690.8	11186.7	9450.64	8441.07	12.2808	11.8245	12.9356	12.2928	13.5131	13.4495	13.2062	13.0432	12.3334	-0.0526076	-0.508911	0.602174
224	Pavir.Aa01363.1	Pavir.Aa01363.1	2428	26889	83	83	9	9	55.3	127186	1	1	1	756.409	1510.8	2	1510.81	-0.0044	0	51.04	17	28	0.00026	K	ADPASDEAK	L			File844 Spectrum400035 scans: 3631	4703.07	3848.26	5245.02	5563.07	14312	11633.2	8911.75	10859.4	12.1994	11.91	12.3567	12.4417	13.8049	13.506	13.1215	13.4067	12.2269	-0.0275574	-0.316954	0.129789
224	Pavir.Aa01363.1	Pavir.Aa01363.1	2428	26889	83	83	9	9	55.3	403708	1	1	1	973.844	2918.51	3	2918.51	-0.0027	0	68.93	22	31	8.6e-06	R	ATYALQEDGATVDVLNETWSK	G			File839 Spectrum301848 scans: 22448	4671.41	5086.06	5420.18	5847.1	10373.4	8283.54	7521.49	9589.12	12.1896	12.3123	12.4041	12.5135	13.3406	13.016	12.8768	13.2272	12.3549	-0.165258	-0.0425689	0.0492228
224	Pavir.Aa01363.1	Pavir.Aa01363.1	2428	26889	83	83	9	9	55.3	403704	1	1	1	973.843	2918.51	3	2918.51	-0.0056	0	74.62	22	31	2.3e-06	R	ATYALQEDGATVDVLNETWSK	G			File837 Spectrum255409 scans: 20064	4162.04	7082.18	4952.41	4330.02	8998.3	7968.31	4603.28	8362.59	12.0231	12.79	12.2739	12.0802	13.1354	12.9601	12.1684	13.0297	12.2918	-0.268705	0.498196	-0.0178669
224	Pavir.Aa01363.1	Pavir.Aa01363.1	2428	26889	83	83	9	9	55.3	270980	1	1	1	667.014	1998.02	3	1998.02	-0.0011	0	55.64		29	0.00013	K	TSIDEEVYNQLVER	A			File835 Spectrum208897 scans: 19390	4054.11	3353.9	3991.78	3257.78	4439.17	4241.55	5095.87	4222.22	11.9852	11.7116	11.9628	11.6697	12.1161	12.0504	12.3151	12.0438	11.8323	0.152851	-0.120697	0.130495
224	Pavir.Aa01363.1	Pavir.Aa01363.1	2428	26889	83	83	9	9	55.3	270974	1	1	1	1000.02	1998.02	2	1998.02	-0.0017	0	56.03		29	0.00012	K	TSIDEEVYNQLVER	A			File835 Spectrum209246 scans: 19762	4016.38	5088.05	4522.96	5580.31	9449.67	9048.67	6675.44	7488.1	11.9717	12.3129	12.1431	12.4461	13.206	13.1435	12.7046	12.8704	12.2184	-0.246761	0.0944578	-0.0753871
224	Pavir.Aa01363.1	Pavir.Aa01363.1	2428	26889	83	83	9	9	55.3	403701	1	1	1	973.842	2918.51	3	2918.51	-0.0065	0	51.85	19	31	0.00044	R	ATYALQEDGATVDVLNETWSK	G			File837 Spectrum256743 scans: 21487	3162.85	3543.42	4245.1	3299.31	5427.18	5292.74	3951.33	4428.51	11.627	11.7909	12.0516	11.6879	12.406	12.3698	11.9481	12.1126	11.7894	-0.162358	0.0015591	0.262217
224	Pavir.Aa01363.1	Pavir.Aa01363.1	2428	26889	83	83	9	9	55.3	403718	1	1	1	973.846	2918.52	3	2918.51	0.005	0	71.91	20	31	4.5e-06	R	ATYALQEDGATVDVLNETWSK	G			File839 Spectrum301289 scans: 21851	2910	8407.42	5244.85	4281.99	13971	7091.62	5971.46	18924.9	11.5068	13.0374	12.3567	12.0641	13.7702	12.7919	12.5439	14.208	12.2413	-0.734447	0.796196	0.115435
224	Pavir.Aa01363.1	Pavir.Aa01363.1	2428	26889	83	83	9	9	55.3	127183	1	1	1	504.608	1510.8	3	1510.81	-0.0051	0	41.6	17	28	0.0022	K	ADPASDEAK	L			File844 Spectrum399978 scans: 3556	2864.12	3244.08	3626.93	4883.8	7296.09	8002.73	4581.09	7102.43	11.4839	11.6636	11.8245	12.2538	12.8329	12.9663	12.1615	12.7941	11.8064	-0.322572	-0.142856	0.0180871
224	Pavir.Aa01363.1	Pavir.Aa01363.1	2428	26889	83	83	9	9	55.3	127188	1	1	1	504.609	1510.8	3	1510.81	-0.004	0	41.17	16	28	0.0026	K	ADPASDEAK	L			File844 Spectrum400068 scans: 3674	2774.16	2539.21	3498.08	2841.91	6388.7	4774.96	3397.36	4937.5	11.4378	11.3102	11.7723	11.4726	12.6413	12.2213	11.7302	12.2696	11.4982	-0.0604134	-0.188085	0.274101
224	Pavir.Aa01363.1	Pavir.Aa01363.1	2428	26889	83	83	9	9	55.3	403804	1	1	1	974.171	2919.49	3	2919.5	-0.004	0	62.77		31	3.6e-05	R	ATYALQEDGATVDVLNETWSK	G	Deamidated (NQ)	0.000000000000000100000.0	File836 Spectrum234257 scans: 21060	2707.53	6338.49	4228.44	4882.25	5070.09	5670.31	4660.64	6356.87	11.4028	12.6299	12.0459	12.2533	12.3078	12.4692	12.1863	12.6341	12.083	-0.680221	0.546942	-0.0370718
224	Pavir.Aa01363.1	Pavir.Aa01363.1	2428	26889	83	83	9	9	55.3	403702	1	1	1	973.843	2918.51	3	2918.51	-0.0058	0	58.45	19	31	9.7e-05	R	ATYALQEDGATVDVLNETWSK	G			File839 Spectrum301341 scans: 21907	2684.31	4940.2	3689.38	4194.05	11583.8	4917.84	4305.53	13453.7	11.3903	12.2704	11.8492	12.0341	13.4998	12.2638	12.072	13.7157	11.886	-0.495659	0.38436	-0.0368338
224	Pavir.Aa01363.1	Pavir.Aa01363.1	2428	26889	83	83	9	9	55.3	403797	1	1	1	974.169	2919.48	3	2919.5	-0.0124	0	65.24		31	2e-05	R	ATYALQEDGATVDVLNETWSK	G	Deamidated (NQ)	0.000000000000000100000.0	File836 Spectrum236045 scans: 22972	2636.74	3913.33	2514.5	3005.04	3781.23	3734.39	3355.66	3732.28	11.3645	11.9342	11.2961	11.5532	11.8846	11.8667	11.7124	11.8658	11.537	-0.172448	0.397195	-0.240929
224	Pavir.Aa01363.1	Pavir.Aa01363.1	2428	26889	83	83	9	9	55.3	403800	1	1	1	974.17	2919.49	3	2919.5	-0.0069	0	32.31	18	31	0.039	R	ATYALQEDGATVDVLNETWSK	G	Deamidated (NQ)	0.000000000000000100000.0	File836 Spectrum233781 scans: 20553	1964.7	1584.21	1721.19	1892.36	3816	3798.86	2229.95	2863.39	10.9401	10.6295	10.7492	10.886	11.8978	11.8913	11.1228	11.4835	10.8012	0.138891	-0.171655	-0.0520084
224	Pavir.Aa01363.1	Pavir.Aa01363.1	2428	26889	83	83	9	9	55.3	270973	1	1	1	667.014	1998.02	3	1998.02	-0.0022	0	58.55		29	6.8e-05	K	TSIDEEVYNQLVER	A			File836 Spectrum233229 scans: 19964	1888.61	2764.59	2820.89	2953.76	4479.25	4371.88	2850.04	2997.93	10.8831	11.4328	11.4619	11.5283	12.129	12.094	11.4768	11.5498	11.3266	-0.443448	0.106292	0.135377
224	Pavir.Aa01363.1	Pavir.Aa01363.1	2428	26889	83	83	9	9	55.3	403813	1	1	1	730.882	2919.5	4	2919.5	0.0017	0	32.05	18	31	0.043	R	ATYALQEDGATVDVLNETWSK	G	Deamidated (NQ)	0.000000000000000100000.0	File836 Spectrum236513 scans: 23472	1802.74	1476.66	1680.09	1772.05	4551.67	3964.17	2645.63	3483.38	10.816	10.5281	10.7143	10.7912	12.1522	11.9528	11.3694	11.7663	10.7124	0.103569	-0.184286	0.00191884
224	Pavir.Aa01363.1	Pavir.Aa01363.1	2428	26889	83	83	9	9	55.3	127174	1	1	1	504.608	1510.8	3	1510.81	-0.0059	0	43.4	16	28	0.0015	K	ADPASDEAK	L			File846 Spectrum447805 scans: 3703	1799.77	2606.85	2211.64	2454.96	5360	4585.39	2946.7	3788.34	10.8136	11.3481	11.1109	11.2615	12.388	12.1628	11.5249	11.8873	11.1335	-0.31992	0.214572	-0.0226182
224	Pavir.Aa01363.1	Pavir.Aa01363.1	2428	26889	83	83	9	9	55.3	127184	1	1	1	756.409	1510.8	2	1510.81	-0.0049	0	31.08	16	28	0.025	K	ADPASDEAK	L			File845 Spectrum423818 scans: 3751	1685.31	1287.63	1726.45	1896.37	4584.16	3938.57	3244.93	4055.17	10.7188	10.3305	10.7536	10.889	12.1624	11.9435	11.664	11.9855	10.673	0.0458216	-0.342479	0.0806113
224	Pavir.Aa01363.1	Pavir.Aa01363.1	2428	26889	83	83	9	9	55.3	127185	1	1	1	756.409	1510.8	2	1510.81	-0.0046	0	28.57	15	28	0.046	K	ADPASDEAK	L			File844 Spectrum400050 scans: 3652	1318.55	1088.54	1372.64	1155.2	3675.77	3231.11	2268.05	2397	10.3647	10.0882	10.4227	10.1739	11.8438	11.6578	11.1472	11.227	10.2624	0.102342	-0.174212	0.16034
224	Pavir.Aa01363.1	Pavir.Aa01363.1	2428	26889	83	83	9	9	55.3	127193	1	1	1	504.61	1510.81	3	1510.81	-0.0012	0	42.94	16	27	0.0016	K	ADPASDEAK	L			File845 Spectrum423706 scans: 3625	815.477	1286.61	931.778	1344.2	1628.65	1959.5	1227.09	1854.37	9.6715	10.3294	9.86384	10.3925	10.6695	10.9363	10.261	10.8567	10.0643	-0.39281	0.265053	-0.200468
246	Pavir.Ca00811.1	Pavir.Ca00811.1	2278	33462	95	95	7	7	33.5	71516	1	1	1	664.36	1326.71	2	1326.71	-0.0027	0	38.46	19	26	0.003	R	FAVETNSVR	G	Deamidated (NQ)	0.000001000.0	File835 Spectrum199799 scans: 9686	1.22689e+06	1.25007e+06	875996	725781	1.64188e+06	2.62106e+06	1.74151e+06	1.75571e+06	20.2266	20.2536	19.7406	19.4692	20.6469	21.3217	20.7319	20.7436	19.9225	0.304098	0.331108	-0.181908
246	Pavir.Ca00811.1	Pavir.Ca00811.1	2278	33462	95	95	7	7	33.5	286431	1	1	1	691.462	2071.36	3	2071.37	-0.006	0	29.04		13	0.0012	R	LLALGIKPVILTGR	R			File835 Spectrum214184 scans: 25030	502703	497556	415136	403063	882799	1.17613e+06	869625	698022	18.9393	18.9245	18.6632	18.6206	19.7517	20.1656	19.73	19.4129	18.7869	0.152417	0.137571	-0.123705
246	Pavir.Ca00811.1	Pavir.Ca00811.1	2278	33462	95	95	7	7	33.5	286429	1	1	1	691.462	2071.36	3	2071.37	-0.0067	0	33		13	0.0005	R	LLALGIKPVILTGR	R			File835 Spectrum214109 scans: 24950	366214	325822	293736	318020	694414	884980	563454	479176	18.4823	18.3137	18.1642	18.2788	19.4054	19.7553	19.1039	18.8702	18.3097	0.172584	0.00398342	-0.145581
246	Pavir.Ca00811.1	Pavir.Ca00811.1	2278	33462	95	95	7	7	33.5	71518	1	1	1	664.36	1326.71	2	1326.71	-0.0024	0	46.03	20	26	0.00053	R	FAVETNSVR	G	Deamidated (NQ)	0.000001000.0	File835 Spectrum199889 scans: 9782	351848	343364	291342	289845	608419	865282	562701	519425	18.4246	18.3894	18.1524	18.1449	19.2147	19.7228	19.102	18.9866	18.2778	0.146782	0.111568	-0.125458
246	Pavir.Ca00811.1	Pavir.Ca00811.1	2278	33462	95	95	7	7	33.5	286435	1	1	1	691.462	2071.37	3	2071.37	-0.0051	0	38.25		13	0.00015	R	LLALGIKPVILTGR	R			File835 Spectrum214214 scans: 25062	336982	269835	231225	288410	564282	735047	585896	464825	18.3623	18.0417	17.8189	18.1378	19.1061	19.4875	19.1603	18.8263	18.0902	0.272129	-0.0484642	-0.271244
246	Pavir.Ca00811.1	Pavir.Ca00811.1	2278	33462	95	95	7	7	33.5	71515	1	1	1	664.36	1326.71	2	1326.71	-0.0028	0	33.25	19	26	0.01	R	FAVETNSVR	G	Deamidated (NQ)	0.000001000.0	File836 Spectrum224241 scans: 10377	316203	322998	259455	277560	561172	704017	498998	464601	18.2705	18.3012	17.9851	18.0824	19.0981	19.4253	18.9287	18.8256	18.1598	0.110686	0.14136	-0.17468
246	Pavir.Ca00811.1	Pavir.Ca00811.1	2278	33462	95	95	7	7	33.5	71527	1	1	1	664.361	1326.71	2	1326.71	-0.0016	0	30.64	19	27	0.022	R	FAVETNSVR	G	Deamidated (NQ)	0.000001000.0	File835 Spectrum200639 scans: 10582	260482	265936	236256	203806	478095	597011	375644	398229	17.9908	18.0207	17.85	17.6368	18.8669	19.1874	18.519	18.6032	17.8746	0.116231	0.146128	-0.0246037
246	Pavir.Ca00811.1	Pavir.Ca00811.1	2278	33462	95	95	7	7	33.5	237518	1	1	1	622.678	1865.01	3	1865.01	-0.0018	0	39.81	16	29	0.0051	R	NLAAAGYTGYEK	L			File839 Spectrum290445 scans: 10285	221080	147297	154525	149300	408948	569190	449067	323001	17.7542	17.1684	17.2375	17.1879	18.6416	19.1185	18.7766	18.3012	17.337	0.41723	-0.168608	-0.0994967
246	Pavir.Ca00811.1	Pavir.Ca00811.1	2278	33462	95	95	7	7	33.5	71514	1	1	1	664.36	1326.71	2	1326.71	-0.0032	0	38.13	20	26	0.0033	R	FAVETNSVR	G	Deamidated (NQ)	0.000001000.0	File836 Spectrum223027 scans: 9082	219668	265479	197326	189946	384826	557656	349112	329615	17.745	18.0182	17.5902	17.5352	18.5538	19.089	18.4133	18.3304	17.7222	0.0227993	0.296077	-0.131943
246	Pavir.Ca00811.1	Pavir.Ca00811.1	2278	33462	95	95	7	7	33.5	237521	1	1	1	622.678	1865.01	3	1865.01	-0.0014	0	41.91		30	0.0033	R	NLAAAGYTGYEK	L			File839 Spectrum290491 scans: 10334	217278	82547.1	104732	89821.6	291472	353004	321377	285667	17.7292	16.3329	16.6763	16.4548	18.153	18.4293	18.2939	18.124	16.7983	0.930877	-0.465378	-0.121965
246	Pavir.Ca00811.1	Pavir.Ca00811.1	2278	33462	95	95	7	7	33.5	286436	1	1	1	518.849	2071.37	4	2071.37	-0.0047	0	25.04		13	0.0031	R	LLALGIKPVILTGR	R			File835 Spectrum214139 scans: 24982	141254	100392	116913	37779.7	286344	346156	275327	115253	17.1079	16.6153	16.8351	15.2053	18.1274	18.4011	18.0708	16.8144	16.4409	0.667027	0.174379	0.394171
246	Pavir.Ca00811.1	Pavir.Ca00811.1	2278	33462	95	95	7	7	33.5	328621	1	1	1	1154.61	2307.2	2	2307.2	-0.0035	0	69.48	26	30	6.6e-06	R	AVVDEAVAYAEGLQLAGDGR	E			File842 Spectrum374695 scans: 26799	130177	106705	81457.5	84374.9	200582	340914	207686	177252	16.9901	16.7033	16.3138	16.3645	17.6138	18.379	17.664	17.4354	16.5929	0.397199	0.110346	-0.279155
246	Pavir.Ca00811.1	Pavir.Ca00811.1	2278	33462	95	95	7	7	33.5	286438	1	1	1	691.463	2071.37	3	2071.37	-0.0045	0	29.32		13	0.0012	R	LLALGIKPVILTGR	R			File835 Spectrum214049 scans: 24886	122296	151692	101750	92868.1	214840	267679	180785	163126	16.9	17.2108	16.6347	16.5029	17.7129	18.0301	17.4639	17.3156	16.8121	0.0879278	0.398689	-0.177418
246	Pavir.Ca00811.1	Pavir.Ca00811.1	2278	33462	95	95	7	7	33.5	286432	1	1	1	518.848	2071.36	4	2071.37	-0.0057	0	32.21		13	0.0006	R	LLALGIKPVILTGR	R			File835 Spectrum214199 scans: 25046	119196	99342.8	71802.6	62572.4	165084	246801	123699	134761	16.863	16.6001	16.1317	15.9332	17.3328	17.913	16.9165	17.04	16.382	0.48095	0.218106	-0.250273
246	Pavir.Ca00811.1	Pavir.Ca00811.1	2278	33462	95	95	7	7	33.5	75128	1	1	1	670.822	1339.63	2	1339.63	-0.0036	0	30.06	17	22	0.0079	R	AGVPCDSWR	F	Methylthio (C)	0.000020000.0	File842 Spectrum361764 scans: 13006	95655.9	133318	76670.7	77904	116104	201251	124495	167274	16.5456	17.0245	16.2264	16.2494	16.8251	17.6186	16.9257	17.3519	16.5115	0.0340964	0.513045	-0.285082
246	Pavir.Ca00811.1	Pavir.Ca00811.1	2278	33462	95	95	7	7	33.5	71519	1	1	1	664.361	1326.71	2	1326.71	-0.0022	0	33.82	18	26	0.0088	R	FAVETNSVR	G	Deamidated (NQ)	0.000001000.0	File836 Spectrum222939 scans: 8988	91580.1	128431	88343.6	81177.4	146286	185750	126512	116038	16.4827	16.9706	16.4308	16.3088	17.1584	17.503	16.9489	16.8242	16.5483	-0.0655065	0.422383	-0.117415
246	Pavir.Ca00811.1	Pavir.Ca00811.1	2278	33462	95	95	7	7	33.5	286437	1	1	1	691.463	2071.37	3	2071.37	-0.0047	0	30.43		13	0.00091	R	LLALGIKPVILTGR	R			File835 Spectrum214290 scans: 25143	84208.7	70648.1	64472.2	58772.2	127851	172202	116724	79163.8	16.3617	16.1084	15.9764	15.8428	16.9641	17.3937	16.8327	16.2726	16.0723	0.289362	0.0360431	-0.0959314
246	Pavir.Ca00811.1	Pavir.Ca00811.1	2278	33462	95	95	7	7	33.5	328626	1	1	1	1154.61	2307.2	2	2307.2	-0.0023	0	100.42	24	30	5.5e-09	R	AVVDEAVAYAEGLQLAGDGR	E			File842 Spectrum374589 scans: 26686	76614.1	99532.8	77884.9	72467.5	161600	233406	131798	131510	16.2253	16.6029	16.2491	16.145	17.3021	17.8325	17.008	17.0048	16.3056	-0.080255	0.297307	-0.0565214
246	Pavir.Ca00811.1	Pavir.Ca00811.1	2278	33462	95	95	7	7	33.5	71511	1	1	1	664.36	1326.7	2	1326.71	-0.0036	0	30.07	18	26	0.021	R	FAVETNSVR	G	Deamidated (NQ)	0.000001000.0	File836 Spectrum224153 scans: 10283	65980.7	84211.7	61956.6	57804.6	103108	149573	98058.5	84455.5	16.0098	16.3617	15.919	15.8189	16.6538	17.1905	16.5814	16.3659	16.0273	-0.0175823	0.334394	-0.108369
246	Pavir.Ca00811.1	Pavir.Ca00811.1	2278	33462	95	95	7	7	33.5	237524	1	1	1	933.514	1865.01	2	1865.01	-0.001	0	51.8	17	30	0.00034	R	NLAAAGYTGYEK	L			File839 Spectrum290372 scans: 10207	52994.1	49464.6	47547.7	42061.4	94871	130521	98086	75564.9	15.6935	15.5941	15.5371	15.3602	16.5337	16.9939	16.5818	16.2054	15.5462	0.147306	0.047872	-0.00914905
246	Pavir.Ca00811.1	Pavir.Ca00811.1	2278	33462	95	95	7	7	33.5	237517	1	1	1	933.513	1865.01	2	1865.01	-0.0032	0	45.21		30	0.0015	R	NLAAAGYTGYEK	L			File839 Spectrum290526 scans: 10371	45045.7	32262.9	33420.5	20433.6	67029.7	80787.9	61183.4	61337.6	15.4591	14.9776	15.0284	14.3187	16.0325	16.3019	15.9009	15.9045	14.9459	0.513155	0.0316385	0.0824956
246	Pavir.Ca00811.1	Pavir.Ca00811.1	2278	33462	95	95	7	7	33.5	237519	1	1	1	622.678	1865.01	3	1865.01	-0.0016	0	46.59		30	0.0011	R	NLAAAGYTGYEK	L			File838 Spectrum269182 scans: 10984	34417.9	21220.5	24522	18595.9	46052.5	77270.2	58557	36526.8	15.0709	14.3732	14.5818	14.1827	15.491	16.2376	15.8376	15.1567	14.5521	0.518738	-0.178963	0.0296572
246	Pavir.Ca00811.1	Pavir.Ca00811.1	2278	33462	95	95	7	7	33.5	286434	1	1	1	691.462	2071.37	3	2071.37	-0.0054	0	27.8		13	0.0017	R	LLALGIKPVILTGR	R			File835 Spectrum214319 scans: 25174	33207.4	22881.4	24627.4	28188	59147.6	65989.2	47301	42177.3	15.0192	14.4819	14.588	14.7828	15.852	16.0099	15.5296	15.3642	14.718	0.301249	-0.236084	-0.12999
246	Pavir.Ca00811.1	Pavir.Ca00811.1	2278	33462	95	95	7	7	33.5	237522	1	1	1	622.678	1865.01	3	1865.01	-0.0012	0	45.89	16	30	0.0013	R	NLAAAGYTGYEK	L			File839 Spectrum290326 scans: 10158	33022.5	29584.7	27600.9	19607.6	48221.7	69479.3	52347.4	38870	15.0112	14.8526	14.7524	14.2591	15.5574	16.0843	15.6758	15.2464	14.7188	0.292344	0.133745	0.0336078
246	Pavir.Ca00811.1	Pavir.Ca00811.1	2278	33462	95	95	7	7	33.5	237528	1	1	1	933.514	1865.01	2	1865.01	-0.0006	0	56.89	18	29	0.0001	R	NLAAAGYTGYEK	L			File839 Spectrum290354 scans: 10187	29418.3	30450.4	21828	26923.9	54626.7	81563.9	50446	41504.6	14.8444	14.8942	14.4139	14.7166	15.7373	16.3156	15.6225	15.341	14.7173	0.127153	0.176898	-0.303379
246	Pavir.Ca00811.1	Pavir.Ca00811.1	2278	33462	95	95	7	7	33.5	237867	1	1	1	623.006	1866	3	1866	-0.0027	0	37.9	16	29	0.0073	R	NLAAAGYTGYEK	L	Deamidated (NQ)	0.100000000000.0	File836 Spectrum225687 scans: 11919	29143.5	31388.2	27049.3	28538.7	53011.7	68482.3	56882	47727	14.8309	14.9379	14.7233	14.8006	15.694	16.0634	15.7957	15.5425	14.8232	0.00770008	0.114745	-0.0998874
246	Pavir.Ca00811.1	Pavir.Ca00811.1	2278	33462	95	95	7	7	33.5	71517	1	1	1	664.36	1326.71	2	1326.71	-0.0026	0	34.98	19	26	0.0067	R	FAVETNSVR	G	Deamidated (NQ)	0.000001000.0	File835 Spectrum199982 scans: 9881	27630.4	34200.9	22503.3	27937.2	46335.7	62142.4	39046	38600.9	14.754	15.0617	14.4578	14.7699	15.4998	15.9233	15.2529	15.2363	14.7609	-0.0068978	0.300879	-0.303016
246	Pavir.Ca00811.1	Pavir.Ca00811.1	2278	33462	95	95	7	7	33.5	71536	1	1	1	664.361	1326.71	2	1326.71	-0.0004	0	31.97	17	26	0.014	R	FAVETNSVR	G	Deamidated (NQ)	0.000001000.0	File835 Spectrum200553 scans: 10490	27146.6	41736.6	25055.7	33286.2	56339.8	63294.7	42067.5	40305	14.7285	15.349	14.6129	15.0226	15.7819	15.9498	15.3604	15.2987	14.9282	-0.199764	0.420775	-0.315396
246	Pavir.Ca00811.1	Pavir.Ca00811.1	2278	33462	95	95	7	7	33.5	71523	1	1	1	664.361	1326.71	2	1326.71	-0.002	0	45.95	23	27	0.00064	R	FAVETNSVR	G	Deamidated (NQ)	0.000001000.0	File836 Spectrum223124 scans: 9185	26188.8	30240.8	25611.9	21748.7	39259	49218.8	32804.1	36773.4	14.6767	14.8842	14.6445	14.4086	15.2607	15.5869	15.0016	15.1664	14.6535	0.0231531	0.230699	-0.00898275
246	Pavir.Ca00811.1	Pavir.Ca00811.1	2278	33462	95	95	7	7	33.5	237516	1	1	1	622.678	1865.01	3	1865.01	-0.0032	0	45.03	18	30	0.0016	R	NLAAAGYTGYEK	L			File838 Spectrum269211 scans: 11015	24973	22348.2	13159.8	15040.5	40881.3	54839.6	47242.7	34519.9	14.6081	14.4479	13.6839	13.8766	15.3192	15.7429	15.5278	15.0751	14.1541	0.453991	0.293777	-0.470241
246	Pavir.Ca00811.1	Pavir.Ca00811.1	2278	33462	95	95	7	7	33.5	71521	1	1	1	664.361	1326.71	2	1326.71	-0.0021	0	26.28	17	26	0.05	R	FAVETNSVR	G	Deamidated (NQ)	0.000001000.0	File835 Spectrum199711 scans: 9592	24958	83519.2	26968.8	27104.7	42439.6	61546.6	40446.6	35775.6	14.6072	16.3498	14.719	14.7263	15.3731	15.9094	15.3037	15.1267	15.1006	-0.493361	1.24925	-0.381569
246	Pavir.Ca00811.1	Pavir.Ca00811.1	2278	33462	95	95	7	7	33.5	71510	1	1	1	664.359	1326.7	2	1326.71	-0.0046	0	28.68		26	0.034	R	FAVETNSVR	G	Deamidated (NQ)	0.000001000.0	File835 Spectrum200361 scans: 10285	23928.9	22155.6	29887.2	27182.4	32739.3	35739.8	32389	28589.1	14.5465	14.4354	14.8672	14.7304	14.9987	15.1252	14.9832	14.8032	14.6449	-0.0984009	-0.209486	0.222372
246	Pavir.Ca00811.1	Pavir.Ca00811.1	2278	33462	95	95	7	7	33.5	237533	1	1	1	622.679	1865.02	3	1865.01	0.001	0	39.52	16	30	0.0056	R	NLAAAGYTGYEK	L			File839 Spectrum290581 scans: 10430	21402.5	13568.6	15959.8	7360.71	32772.7	33965.9	31084.2	28084.6	14.3855	13.728	13.9622	12.8456	15.0002	15.0518	14.9239	14.7775	13.7303	0.655175	-0.00232867	0.231837
246	Pavir.Ca00811.1	Pavir.Ca00811.1	2278	33462	95	95	7	7	33.5	71531	1	1	1	664.361	1326.71	2	1326.71	-0.0011	0	27.56	17	27	0.044	R	FAVETNSVR	G	Deamidated (NQ)	0.000001000.0	File835 Spectrum200735 scans: 10684	21139.3	31356	19399.5	23306.3	37971.3	50277.9	30618	30999.5	14.3676	14.9365	14.2437	14.5084	15.2126	15.6176	14.9021	14.92	14.5141	-0.146424	0.422388	-0.270331
246	Pavir.Ca00811.1	Pavir.Ca00811.1	2278	33462	95	95	7	7	33.5	328624	1	1	1	1154.61	2307.2	2	2307.2	-0.0025	0	67.97		30	9.6e-06	R	AVVDEAVAYAEGLQLAGDGR	E			File842 Spectrum374828 scans: 26941	20835.3	22031	27501.7	19330.1	40387.3	60551.7	42637.7	40338.6	14.3467	14.4272	14.7472	14.2386	15.3016	15.8859	15.3798	15.2999	14.4399	-0.0932016	-0.0126976	0.307285
246	Pavir.Ca00811.1	Pavir.Ca00811.1	2278	33462	95	95	7	7	33.5	286439	1	1	1	518.849	2071.37	4	2071.37	-0.0042	0	32.16		13	0.00061	R	LLALGIKPVILTGR	R			File835 Spectrum214037 scans: 24873	20688	15273.7	18757.6	16352	34593.4	46022.8	32247.8	19182.7	14.3365	13.8988	14.1952	13.9972	15.0782	15.4901	14.9769	14.2275	14.1069	0.229599	-0.20815	0.088282
246	Pavir.Ca00811.1	Pavir.Ca00811.1	2278	33462	95	95	7	7	33.5	286430	1	1	1	691.462	2071.36	3	2071.37	-0.0063	0	16.89		13	0.02	R	LLALGIKPVILTGR	R			File836 Spectrum237744 scans: 24786	19336.1	21592.7	16697.2	14344.4	25253.7	41225.8	24300	21682.9	14.239	14.3983	14.0273	13.8082	14.6242	15.3313	14.5687	14.4043	14.1182	0.120812	0.280062	-0.0908767
246	Pavir.Ca00811.1	Pavir.Ca00811.1	2278	33462	95	95	7	7	33.5	237869	1	1	1	623.006	1866	3	1866	-0.0021	0	37.29	16	29	0.0082	R	NLAAAGYTGYEK	L	Deamidated (NQ)	0.100000000000.0	File836 Spectrum225714 scans: 11948	18034.8	16115	14467.2	14232.6	23702.3	31602.7	33168.3	19989.9	14.1385	13.9761	13.8205	13.7969	14.5327	14.9478	15.0175	14.287	13.933	0.205488	0.0431125	-0.112504
246	Pavir.Ca00811.1	Pavir.Ca00811.1	2278	33462	95	95	7	7	33.5	237526	1	1	1	622.678	1865.01	3	1865.01	-0.0008	0	49.75	19	30	0.00054	R	NLAAAGYTGYEK	L			File838 Spectrum269243 scans: 11049	15779.7	13816.2	8439.7	11750.8	21686.4	32088.8	23753.2	19743.3	13.9458	13.7541	13.043	13.5205	14.4045	14.9698	14.5358	14.2691	13.5658	0.379957	0.188249	-0.522854
246	Pavir.Ca00811.1	Pavir.Ca00811.1	2278	33462	95	95	7	7	33.5	71524	1	1	1	664.361	1326.71	2	1326.71	-0.0019	0	30.84	18	27	0.021	R	FAVETNSVR	G	Deamidated (NQ)	0.000001000.0	File836 Spectrum224337 scans: 10479	15733.6	19787.1	15233.8	16636.8	24458.9	34850	20751.5	24956.6	13.9416	14.2723	13.895	14.0221	14.5781	15.0889	14.3409	14.6071	14.0327	-0.0911658	0.239542	-0.13774
246	Pavir.Ca00811.1	Pavir.Ca00811.1	2278	33462	95	95	7	7	33.5	237523	1	1	1	622.678	1865.01	3	1865.01	-0.001	0	32.98		30	0.026	R	NLAAAGYTGYEK	L			File839 Spectrum290599 scans: 10449	13909.4	10077.1	9405.14	7217.51	17921.8	18534.3	18107.6	16335	13.7638	13.2988	13.1992	12.8173	14.1294	14.1779	14.1443	13.9957	13.2698	0.494	0.0290269	-0.0705392
246	Pavir.Ca00811.1	Pavir.Ca00811.1	2278	33462	95	95	7	7	33.5	237529	1	1	1	622.679	1865.01	3	1865.01	-0.0005	0	37.62	16	29	0.0084	R	NLAAAGYTGYEK	L			File838 Spectrum269115 scans: 10912	12870.1	11249.9	11922.4	8788.81	26321	27980.9	26788.1	20135.7	13.6517	13.4576	13.5414	13.1015	14.6839	14.7722	14.7093	14.2975	13.438	0.213687	0.0195743	0.103336
246	Pavir.Ca00811.1	Pavir.Ca00811.1	2278	33462	95	95	7	7	33.5	286444	1	1	1	518.849	2071.37	4	2071.37	-0.003	0	30.02		13	0.001	R	LLALGIKPVILTGR	R			File835 Spectrum214012 scans: 24846	10005.4	9870.12	7001.98	7914.27	16283.3	20467.9	14625.6	10733.8	13.2885	13.2689	12.7735	12.9502	13.9911	14.3211	13.8362	13.3899	13.0703	0.218205	0.19857	-0.296734
246	Pavir.Ca00811.1	Pavir.Ca00811.1	2278	33462	95	95	7	7	33.5	237520	1	1	1	622.678	1865.01	3	1865.01	-0.0014	0	39.63		30	0.0055	R	NLAAAGYTGYEK	L			File838 Spectrum269262 scans: 11069	8959.63	6646.28	7304.58	4696.73	11818.1	13592.4	12299.8	10880.7	13.1292	12.6983	12.8346	12.1974	13.5287	13.7305	13.5863	13.4095	12.7149	0.414329	-0.0165642	0.11969
246	Pavir.Ca00811.1	Pavir.Ca00811.1	2278	33462	95	95	7	7	33.5	286426	1	1	1	518.848	2071.36	4	2071.37	-0.0081	0	23.91		13	0.0041	R	LLALGIKPVILTGR	R			File836 Spectrum237699 scans: 24738	8652.88	5219.51	6295.44	5300.59	13415.4	17110.6	15404.8	11603.8	13.079	12.3497	12.6201	12.3719	13.7116	14.0626	13.9111	13.5023	12.6052	0.473791	-0.255474	0.0149183
246	Pavir.Ca00811.1	Pavir.Ca00811.1	2278	33462	95	95	7	7	33.5	286428	1	1	1	691.462	2071.36	3	2071.37	-0.0069	0	17.89		13	0.016	R	LLALGIKPVILTGR	R			File836 Spectrum237792 scans: 24837	7587.98	5522.45	6290.05	6229.73	11436.5	17829.5	13595.5	9984.88	12.8895	12.4311	12.6189	12.605	13.4814	14.122	13.7308	13.2855	12.6361	0.253399	-0.205007	-0.0172455
246	Pavir.Ca00811.1	Pavir.Ca00811.1	2278	33462	95	95	7	7	33.5	237527	1	1	1	622.678	1865.01	3	1865.01	-0.0006	0	34.33	16	29	0.018	R	NLAAAGYTGYEK	L			File838 Spectrum269102 scans: 10898	6564.12	8089.38	5542.61	3298.48	9216.64	12947.4	11243.4	6057.52	12.6804	12.9818	12.4364	11.6876	13.17	13.6604	13.4568	12.5645	12.4465	0.233852	0.53528	-0.010183
246	Pavir.Ca00811.1	Pavir.Ca00811.1	2278	33462	95	95	7	7	33.5	286427	1	1	1	518.848	2071.36	4	2071.37	-0.0079	0	28.35		13	0.0015	R	LLALGIKPVILTGR	R			File836 Spectrum237657 scans: 24693	4862.13	4803.06	5192.12	4116.35	8664.31	9648.46	7527.03	5720.06	12.2474	12.2297	12.3421	12.0072	13.0809	13.2361	12.8779	12.4818	12.2066	0.0407806	0.0231454	0.135516
246	Pavir.Ca00811.1	Pavir.Ca00811.1	2278	33462	95	95	7	7	33.5	328644	1	1	1	1154.61	2307.2	2	2307.2	0.0019	0	78.42		30	8.6e-07	R	AVVDEAVAYAEGLQLAGDGR	E			File843 Spectrum398339 scans: 26857	4396.68	5214.74	3561.35	3988.91	7151.76	11479.2	7667.36	6786.27	12.1022	12.3484	11.7982	11.9618	12.8041	13.4867	12.9045	12.7284	12.0526	0.0495569	0.295738	-0.254434
246	Pavir.Ca00811.1	Pavir.Ca00811.1	2278	33462	95	95	7	7	33.5	328652	1	1	1	1154.61	2307.21	2	2307.2	0.0048	0	61.73	27	30	3.9e-05	R	AVVDEAVAYAEGLQLAGDGR	E			File843 Spectrum398299 scans: 26814	4350.41	4267.79	3678.66	3860.58	5828.58	10234.4	6352.82	5894.96	12.0869	12.0593	11.845	11.9146	12.5089	13.3211	12.6332	12.5253	11.9764	0.110492	0.0828303	-0.131479
246	Pavir.Ca00811.1	Pavir.Ca00811.1	2278	33462	95	95	7	7	33.5	286443	1	1	1	691.463	2071.37	3	2071.37	-0.0031	0	18.58		13	0.014	R	LLALGIKPVILTGR	R			File839 Spectrum304840 scans: 25639	4269.89	4776.03	4038.55	4039.98	6349.23	9308.8	6867.98	5797.42	12.06	12.2216	11.9796	11.9801	12.6324	13.1844	12.7457	12.5012	12.0603	-0.000349093	0.161262	-0.0807133
246	Pavir.Ca00811.1	Pavir.Ca00811.1	2278	33462	95	95	7	7	33.5	286440	1	1	1	691.463	2071.37	3	2071.37	-0.0041	0	15.23		13	0.03	R	LLALGIKPVILTGR	R			File839 Spectrum304826 scans: 25624	3728.41	4146.29	3223.63	3647.54	6495.85	7344.09	5607.53	5074.28	11.8643	12.0176	11.6545	11.8327	12.6653	12.8424	12.4531	12.309	11.8423	0.0220618	0.175323	-0.18781
246	Pavir.Ca00811.1	Pavir.Ca00811.1	2278	33462	95	95	7	7	33.5	286447	1	1	1	518.851	2071.37	4	2071.37	0.0026	0	30.33		13	0.00093	R	LLALGIKPVILTGR	R			File836 Spectrum237787 scans: 24831	3300.19	1251.31	2579.17	1712.62	2731.01	4801.46	3180.5	3366.79	11.6883	10.2892	11.3327	10.742	11.4152	12.2293	11.635	11.7172	11.0131	0.675274	-0.723839	0.319634
246	Pavir.Ca00811.1	Pavir.Ca00811.1	2278	33462	95	95	7	7	33.5	286441	1	1	1	518.849	2071.37	4	2071.37	-0.004	0	25.01		13	0.0032	R	LLALGIKPVILTGR	R			File835 Spectrum214337 scans: 25193	3158.64	3234.63	3653.21	3093.71	6865.1	7248.56	6024.56	5509.29	11.6251	11.6594	11.8349	11.5951	12.7451	12.8235	12.5566	12.4276	11.6786	-0.0535474	-0.0192504	0.156312
246	Pavir.Ca00811.1	Pavir.Ca00811.1	2278	33462	95	95	7	7	33.5	411635	1	1	1	999.859	2996.55	3	2996.56	-0.0092	0	36.9		31	0.014	R	EVWVFDVDETTLSNLPYYAK	H			File846 Spectrum471194 scans: 28652	2309.8	3509.06	2044.71	2259.04	3359.4	4638.56	2741.21	2486.69	11.1736	11.7769	10.9977	11.1415	11.714	12.1795	11.4206	11.28	11.2724	-0.0988471	0.504471	-0.274718
246	Pavir.Ca00811.1	Pavir.Ca00811.1	2278	33462	95	95	7	7	33.5	71526	1	1	1	443.243	1326.71	3	1326.71	-0.0017	0	48.93	23	27	0.00032	R	FAVETNSVR	G	Deamidated (NQ)	0.000001000.0	File835 Spectrum200610 scans: 10551	2295.69	2938.03	1013.21	1704.85	3618.1	4795.33	2676.31	4125.8	11.1647	11.5206	9.98471	10.7354	11.821	12.2274	11.386	12.0105	10.8514	0.313339	0.669265	-0.866659
246	Pavir.Ca00811.1	Pavir.Ca00811.1	2278	33462	95	95	7	7	33.5	286433	1	1	1	518.849	2071.37	4	2071.37	-0.0054	0	35.41		13	0.00029	R	LLALGIKPVILTGR	R			File836 Spectrum237634 scans: 24668	2210.71	2185.21	2651.18	3320.45	5000.7	6831.3	4074.38	4123.56	11.1103	11.0936	11.3724	11.6972	12.2879	12.7379	11.9924	12.0097	11.3184	-0.208063	-0.224801	0.054062
246	Pavir.Ca00811.1	Pavir.Ca00811.1	2278	33462	95	95	7	7	33.5	411640	1	1	1	999.86	2996.56	3	2996.56	-0.0051	0	54.95		31	0.00023	R	EVWVFDVDETTLSNLPYYAK	H			File846 Spectrum471225 scans: 28685	1938.96	2651.63	2389.58	1876.23	3474.23	4673.7	3328.6	2737.83	10.9211	11.3727	11.2225	10.8736	11.7625	12.1904	11.7007	11.4188	11.0975	-0.176404	0.275188	0.125066
246	Pavir.Ca00811.1	Pavir.Ca00811.1	2278	33462	95	95	7	7	33.5	328647	1	1	1	770.075	2307.2	3	2307.2	0.0022	0	36.36	21	30	0.014	R	AVVDEAVAYAEGLQLAGDGR	E			File827 Spectrum22875 scans: 27534	1867.27	2754.31	1715.31	1340.22	2078.01	2041.83	1910.37	2888.06	10.8667	11.4275	10.7443	10.3883	11.021	10.9956	10.8996	11.4959	10.8567	0.0100418	0.570801	-0.112422
246	Pavir.Ca00811.1	Pavir.Ca00811.1	2278	33462	95	95	7	7	33.5	328643	1	1	1	770.075	2307.2	3	2307.2	0.0017	0	68.21		30	9e-06	R	AVVDEAVAYAEGLQLAGDGR	E			File843 Spectrum398243 scans: 26754	1626.71	1134.25	1778.08	1196.6	1230.8	2120.61	1287.64	1220.92	10.6677	10.1475	10.7961	10.2247	10.2654	11.0503	10.3305	10.2538	10.459	0.208722	-0.311501	0.33708
246	Pavir.Ca00811.1	Pavir.Ca00811.1	2278	33462	95	95	7	7	33.5	328635	1	1	1	1154.61	2307.2	2	2307.2	0.0002	0	69.58		30	6.6e-06	R	AVVDEAVAYAEGLQLAGDGR	E			File844 Spectrum421206 scans: 26272	1459.76	1189.12	1539.59	1136.2	2183.02	3099.56	2336.45	2299.46	10.5115	10.2157	10.5883	10.15	11.0921	11.5978	11.1901	11.1671	10.3664	0.145131	-0.150699	0.22195
246	Pavir.Ca00811.1	Pavir.Ca00811.1	2278	33462	95	95	7	7	33.5	328612	1	1	1	770.073	2307.2	3	2307.2	-0.0045	0	30.01	18	30	0.058	R	AVVDEAVAYAEGLQLAGDGR	E			File827 Spectrum22945 scans: 27609	1229.56	1956.1	1492.59	981.735	1364.63	1204.65	799.466	1831.94	10.2639	10.9338	10.5436	9.93919	10.4143	10.2344	9.64289	10.8392	10.4201	-0.156191	0.513645	0.123479
246	Pavir.Ca00811.1	Pavir.Ca00811.1	2278	33462	95	95	7	7	33.5	328630	1	1	1	770.074	2307.2	3	2307.2	-0.0016	0	44.28	15	30	0.0022	R	AVVDEAVAYAEGLQLAGDGR	E			File827 Spectrum22911 scans: 27573	1109.41	2154.84	1554.83	1519.95	1880.28	1516.72	1089.08	2308.43	10.1156	11.0734	10.6025	10.5698	10.8767	10.5667	10.0889	11.1727	10.5903	-0.474747	0.483042	0.0122225
246	Pavir.Ca00811.1	Pavir.Ca00811.1	2278	33462	95	95	7	7	33.5	328629	1	1	1	770.074	2307.2	3	2307.2	-0.0018	0	82.78		30	3.1e-07	R	AVVDEAVAYAEGLQLAGDGR	E			File842 Spectrum374519 scans: 26611	1069.08	2555.67	1538.68	1460.47	944.775	1530.38	2535.14	2463.15	10.0622	11.3195	10.5875	10.5122	9.88383	10.5797	11.3078	11.2663	10.6203	-0.558178	0.69915	-0.0328562
246	Pavir.Ca00811.1	Pavir.Ca00811.1	2278	33462	95	95	7	7	33.5	411642	1	1	1	999.861	2996.56	3	2996.56	-0.0035	0	34.89		31	0.023	R	EVWVFDVDETTLSNLPYYAK	H			File846 Spectrum471236 scans: 28697	1001.58	822.234	1115.27	1729.55	2221.59	2932.35	1980.22	2151.47	9.96807	9.68341	10.1232	10.7562	11.1174	11.5178	10.9514	11.0711	10.1327	-0.164643	-0.449303	-0.00952568
246	Pavir.Ca00811.1	Pavir.Ca00811.1	2278	33462	95	95	7	7	33.5	328608	1	1	1	770.073	2307.2	3	2307.2	-0.0053	0	43.92	16	30	0.0024	R	AVVDEAVAYAEGLQLAGDGR	E			File845 Spectrum445585 scans: 26976	1000.89	1205	1049.26	802.521	889.716	1223.84	1079.29	1145.81	9.96707	10.2348	10.0352	9.6484	9.7972	10.2572	10.0759	10.1621	9.97136	-0.00428962	0.263459	0.063798
246	Pavir.Ca00811.1	Pavir.Ca00811.1	2278	33462	95	95	7	7	33.5	328638	1	1	1	770.075	2307.2	3	2307.2	0.0006	0	33.44	16	30	0.027	R	AVVDEAVAYAEGLQLAGDGR	E			File845 Spectrum445605 scans: 26997	917.257	1206.31	1129.28	991.476	1211.77	950.85	1103.96	1405.91	9.84118	10.2364	10.1412	9.95343	10.2429	9.89307	10.1085	10.4573	10.043	-0.201863	0.193337	0.0981383
246	Pavir.Ca00811.1	Pavir.Ca00811.1	2278	33462	95	95	7	7	33.5	286442	1	1	1	518.849	2071.37	4	2071.37	-0.0035	0	25.16		13	0.003	R	LLALGIKPVILTGR	R			File839 Spectrum304829 scans: 25627	900.664	694.943	873.127	750.644	1386.6	1722.46	1458.99	1091.09	9.81485	9.44075	9.77005	9.55198	10.4373	10.7503	10.5108	10.0916	9.64441	0.170438	-0.203656	0.12564
246	Pavir.Ca00811.1	Pavir.Ca00811.1	2278	33462	95	95	7	7	33.5	328620	1	1	1	770.073	2307.2	3	2307.2	-0.0038	0	79.46	21	30	6.6e-07	R	AVVDEAVAYAEGLQLAGDGR	E			File842 Spectrum374193 scans: 26263	784.273	1245.6	1435.02	465.14	1061.38	1324	854.19	1248.95	9.61521	10.2826	10.4869	8.86152	10.0517	10.3707	9.73841	10.2865	9.81155	-0.196342	0.471071	0.675304
246	Pavir.Ca00811.1	Pavir.Ca00811.1	2278	33462	95	95	7	7	33.5	411639	1	1	1	999.86	2996.56	3	2996.56	-0.0059	0	54.8		31	0.00024	R	EVWVFDVDETTLSNLPYYAK	H			File846 Spectrum471278 scans: 28742	683.677	992.217	832.353	758.825	1786.58	1950.75	1726.05	1290.43	9.41717	9.95451	9.70105	9.56762	10.803	10.9298	10.7533	10.3336	9.66009	-0.242917	0.294422	0.0409619
246	Pavir.Ca00811.1	Pavir.Ca00811.1	2278	33462	95	95	7	7	33.5	328623	1	1	1	770.073	2307.2	3	2307.2	-0.0027	0	56.44	24	30	0.00014	R	AVVDEAVAYAEGLQLAGDGR	E			File842 Spectrum375411 scans: 27562	290.906	1324.7	496.737	745.976	715.241	677.813	505.842	478.839	8.18441	10.3714	8.95634	9.54299	9.48229	9.40474	8.98254	8.9034	9.26379	-1.07939	1.10765	-0.307457
248	Pavir.Cb00621.1	Pavir.Cb00621.1	2258	32819	85	85	6	6	31.4	179304	1	1	1	831.462	1660.91	2	1660.91	-0.0025	0	34.81		30	0.018	R	VGEVVELGPVMGR	G	Oxidation (M)	0.0000000000300.0	File837 Spectrum250194 scans: 14502	100958	106654	160011	106757	359881	320382	205724	109950	16.6234	16.7026	17.2878	16.704	18.4572	18.2894	17.6503	16.7465	16.8294	-0.206048	-0.126858	0.458373
248	Pavir.Cb00621.1	Pavir.Cb00621.1	2258	32819	85	85	6	6	31.4	174161	1	1	1	823.465	1644.91	2	1644.92	-0.0029	0	47.29	19	30	0.00095	R	VGEVVELGPVMGR	G			File842 Spectrum367043 scans: 18637	83450.1	78501.9	151017	107862	414891	372800	314897	133528	16.3486	16.2604	17.2044	16.7188	18.6624	18.508	18.2645	17.0268	16.6331	-0.284436	-0.372623	0.571292
248	Pavir.Cb00621.1	Pavir.Cb00621.1	2258	32819	85	85	6	6	31.4	174148	1	1	1	823.464	1644.91	2	1644.92	-0.004	0	47.59		30	0.00089	R	VGEVVELGPVMGR	G			File842 Spectrum367133 scans: 18733	71914.2	88262.9	166045	95543.2	411777	361532	294631	120411	16.134	16.4295	17.3412	16.5439	18.6515	18.4638	18.1686	16.8776	16.6121	-0.478159	-0.182628	0.729069
248	Pavir.Cb00621.1	Pavir.Cb00621.1	2258	32819	85	85	6	6	31.4	174153	1	1	1	823.464	1644.91	2	1644.92	-0.0037	0	46.95	19	30	0.001	R	VGEVVELGPVMGR	G			File842 Spectrum366954 scans: 18542	59753.6	62778.6	125423	74696.8	287922	227265	195516	97057.2	15.8667	15.938	16.9364	16.1888	18.1353	17.794	17.5769	16.5665	16.2325	-0.365744	-0.294498	0.703965
248	Pavir.Cb00621.1	Pavir.Cb00621.1	2258	32819	85	85	6	6	31.4	174170	1	1	1	823.467	1644.92	2	1644.92	0.0011	0	53.34		30	0.00023	R	VGEVVELGPVMGR	G			File843 Spectrum390671 scans: 18678	46872.7	61479.8	91896.8	54006.9	226638	186760	165862	76237.6	15.5165	15.9078	16.4877	15.7209	17.79	17.5108	17.3396	16.2182	15.9082	-0.391758	-0.000391582	0.579509
248	Pavir.Cb00621.1	Pavir.Cb00621.1	2258	32819	85	85	6	6	31.4	148295	1	1	1	786.885	1571.75	2	1571.76	-0.0008	0	27.97	21	24	0.024	K	DLQSMPYQDR	F	Oxidation (M)	0.0000300000.0	File830 Spectrum76052 scans: 5815	35747.6	33153.3	85783.9	62337	229082	189041	122101	54711.7	15.1256	15.0169	16.3884	15.9278	17.8055	17.5283	16.8977	15.7396	15.6147	-0.489101	-0.597797	0.773758
248	Pavir.Cb00621.1	Pavir.Cb00621.1	2258	32819	85	85	6	6	31.4	179311	1	1	1	831.463	1660.91	2	1660.91	-0.0004	0	33.74		30	0.021	R	VGEVVELGPVMGR	G	Oxidation (M)	0.0000000000300.0	File837 Spectrum250114 scans: 14416	32639.3	35445.9	42370.1	33304.1	101940	82557.2	57925.9	33914.5	14.9943	15.1133	15.3708	15.0234	16.6374	16.3331	15.8219	15.0496	15.1255	-0.131133	-0.0121253	0.245301
248	Pavir.Cb00621.1	Pavir.Cb00621.1	2258	32819	85	85	6	6	31.4	174154	1	1	1	823.464	1644.91	2	1644.92	-0.0037	0	46.44		30	0.0011	R	VGEVVELGPVMGR	G			File842 Spectrum367241 scans: 18848	30544.6	33689.4	44097.2	37685.8	95354.2	87626.1	69783.7	47323.4	14.8986	15.04	15.4284	15.2017	16.541	16.4191	16.0906	15.5303	15.1422	-0.243564	-0.102185	0.286208
248	Pavir.Cb00621.1	Pavir.Cb00621.1	2258	32819	85	85	6	6	31.4	142226	1	1	1	778.887	1555.76	2	1555.76	-0.0011	0	26.15	25	26	0.049	K	DLQSMPYQDR	F			File834 Spectrum173876 scans: 9406	28398.3	40261.1	62211.9	34580.7	143221	125748	93582.3	45731.3	14.7935	15.2971	15.9249	15.0777	17.1279	16.9402	16.5139	15.4809	15.2733	-0.479784	0.0238012	0.651604
248	Pavir.Cb00621.1	Pavir.Cb00621.1	2258	32819	85	85	6	6	31.4	174157	1	1	1	823.464	1644.91	2	1644.92	-0.0033	0	53.38		30	0.00023	R	VGEVVELGPVMGR	G			File842 Spectrum366863 scans: 18445	23855.1	29699	46391.9	28880.3	91501.9	79353.8	75461.3	39071.8	14.542	14.8581	15.5016	14.8178	16.4815	16.276	16.2034	15.2538	14.9299	-0.38787	-0.0717529	0.571706
248	Pavir.Cb00621.1	Pavir.Cb00621.1	2258	32819	85	85	6	6	31.4	174171	1	1	1	823.467	1644.92	2	1644.92	0.0018	0	46.76	19	30	0.0011	R	VGEVVELGPVMGR	G			File843 Spectrum390583 scans: 18584	17020.1	25318.7	38125.9	22500.3	77658	62460.4	59519	27154	14.055	14.6279	15.2185	14.4577	16.2448	15.9307	15.8611	14.7289	14.5898	-0.534797	0.0381628	0.628732
248	Pavir.Cb00621.1	Pavir.Cb00621.1	2258	32819	85	85	6	6	31.4	179310	1	1	1	831.463	1660.91	2	1660.91	-0.0004	0	32.16		30	0.031	R	VGEVVELGPVMGR	G	Oxidation (M)	0.0000000000300.0	File842 Spectrum363543 scans: 14903	16163.8	17428.3	27394.3	18569.7	61097.7	51950.1	42377.5	23319.7	13.9805	14.0891	14.7416	14.1807	15.8988	15.6648	15.371	14.5093	14.248	-0.267489	-0.158825	0.493621
248	Pavir.Cb00621.1	Pavir.Cb00621.1	2258	32819	85	85	6	6	31.4	163779	1	1	1	807.927	1613.84	2	1613.84	-0.0002	0	70.76	26	28	2.8e-06	R	SLIEFGMAASER	N			File846 Spectrum462248 scans: 19110	15538.8	1666.97	16695.9	33989.6	447566	77087.2	23415.8	10205.7	13.9236	10.703	14.0272	15.0528	18.7717	16.2342	14.5152	13.3171	13.4267	0.496933	-2.72364	0.600556
248	Pavir.Cb00621.1	Pavir.Cb00621.1	2258	32819	85	85	6	6	31.4	169322	1	1	1	815.927	1629.84	2	1629.83	0.0054	0	56.31	17	28	7.5e-05	R	SLIEFGMAASER	N	Oxidation (M)	0.000000300000.0	File843 Spectrum387216 scans: 14992	15066.1	6967.2	20619.1	32129.5	257966	50949.8	22943.8	18723.1	13.879	12.7664	14.3317	14.9716	17.9768	15.6368	14.4858	14.1925	13.9872	-0.108153	-1.22081	0.344522
248	Pavir.Cb00621.1	Pavir.Cb00621.1	2258	32819	85	85	6	6	31.4	179305	1	1	1	831.462	1660.91	2	1660.91	-0.0023	0	39.1		30	0.0065	R	VGEVVELGPVMGR	G	Oxidation (M)	0.0000000000300.0	File842 Spectrum363500 scans: 14857	13728.3	18263.2	26929.8	17263.3	59733.2	43832.7	40489.2	23061.9	13.7449	14.1567	14.7169	14.0754	15.8662	15.4197	15.3053	14.4932	14.1735	-0.428602	-0.0168099	0.543455
248	Pavir.Cb00621.1	Pavir.Cb00621.1	2258	32819	85	85	6	6	31.4	148301	1	1	1	786.885	1571.76	2	1571.76	0.0001	0	25.65	21	25	0.044	K	DLQSMPYQDR	F	Oxidation (M)	0.0000300000.0	File829 Spectrum51634 scans: 5790	13530.1	14470.6	25315.8	15901.8	58200.2	45091.7	33193.2	14978.4	13.7239	13.8208	14.6278	13.9569	15.8287	15.4606	15.0186	13.8706	14.0323	-0.308455	-0.211507	0.595407
248	Pavir.Cb00621.1	Pavir.Cb00621.1	2258	32819	85	85	6	6	31.4	179317	1	1	1	831.466	1660.92	2	1660.91	0.0058	0	33.95		29	0.019	R	VGEVVELGPVMGR	G	Oxidation (M)	0.0000000000300.0	File842 Spectrum363576 scans: 14938	12362.5	17467	20588.1	14824.2	37797.3	37091.2	30136.7	19373.3	13.5937	14.0923	14.3295	13.8557	15.206	15.1788	14.8792	14.2418	13.9678	-0.374124	0.12454	0.36172
248	Pavir.Cb00621.1	Pavir.Cb00621.1	2258	32819	85	85	6	6	31.4	431177	1	1	1	1086.3	3255.88	3	3255.88	-0.0016	0	46.67		24	0.00032	R	SGLQFDLLVKPVPGTTSEQLSK	L			File829 Spectrum65581 scans: 20667	11647.7	5898.59	26708.8	14689.7	68719.6	56226.8	46715.9	17747.7	13.5078	12.5262	14.705	13.8425	16.0684	15.779	15.5116	14.1153	13.6454	-0.137609	-1.11921	1.05966
248	Pavir.Cb00621.1	Pavir.Cb00621.1	2258	32819	85	85	6	6	31.4	431178	1	1	1	1086.3	3255.88	3	3255.88	-0.0005	0	42.97		24	0.00074	R	SGLQFDLLVKPVPGTTSEQLSK	L			File829 Spectrum65614 scans: 20702	11538.8	4991.67	15734.6	8989.73	46920.9	39908.1	28525	13005.2	13.4942	12.2853	13.9416	13.1341	15.5179	15.2844	14.7999	13.6668	13.2138	0.280398	-0.928498	0.727844
248	Pavir.Cb00621.1	Pavir.Cb00621.1	2258	32819	85	85	6	6	31.4	148296	1	1	1	524.926	1571.76	3	1571.76	-0.0003	0	40.55		24	0.0014	K	DLQSMPYQDR	F	Oxidation (M)	0.0000300000.0	File830 Spectrum76067 scans: 5831	10719.9	17597.5	24130.8	19183.6	39513.3	30295	23644.5	18924.9	13.388	14.1031	14.5586	14.2276	15.2701	14.8868	14.5292	14.208	14.0693	-0.681313	0.0337723	0.489272
248	Pavir.Cb00621.1	Pavir.Cb00621.1	2258	32819	85	85	6	6	31.4	148281	1	1	1	524.924	1571.75	3	1571.76	-0.004	0	38.62	23	26	0.0028	K	DLQSMPYQDR	F	Oxidation (M)	0.0000300000.0	File834 Spectrum170077 scans: 5354	10518.1	17930.8	20627	9207.09	41367.3	30587.9	20146.5	15707.2	13.3606	14.1302	14.3322	13.1685	15.3362	14.9007	14.2982	13.9391	13.7479	-0.387294	0.382273	0.58437
248	Pavir.Cb00621.1	Pavir.Cb00621.1	2258	32819	85	85	6	6	31.4	169318	1	1	1	815.926	1629.84	2	1629.83	0.0025	0	54.98		28	0.0001	R	SLIEFGMAASER	N	Oxidation (M)	0.000000300000.0	File843 Spectrum387186 scans: 14960	10106.4	6399.47	13860.8	24756.8	215304	40270.5	14461.9	10820.1	13.303	12.6437	13.7587	14.5955	17.716	15.2974	13.82	13.4014	13.5752	-0.272264	-0.93151	0.183479
248	Pavir.Cb00621.1	Pavir.Cb00621.1	2258	32819	85	85	6	6	31.4	431174	1	1	1	1086.3	3255.87	3	3255.88	-0.0115	0	48.37		25	0.00027	R	SGLQFDLLVKPVPGTTSEQLSK	L			File829 Spectrum65522 scans: 20604	7915.36	6437.15	19255.2	9663.99	48596.9	39816.5	28821.7	9946.76	12.9504	12.6522	14.233	13.2384	15.5686	15.2811	14.8149	13.28	13.2685	-0.318063	-0.616296	0.96446
248	Pavir.Cb00621.1	Pavir.Cb00621.1	2258	32819	85	85	6	6	31.4	169319	1	1	1	815.926	1629.84	2	1629.83	0.003	0	49.62	18	28	0.00036	R	SLIEFGMAASER	N	Oxidation (M)	0.000000300000.0	File842 Spectrum363637 scans: 15003	7578.24	4911.04	5540.56	12673.9	120294	21541.2	7688.3	6715.63	12.8876	12.2618	12.4358	13.6296	16.8762	14.3948	12.9084	12.7133	12.8037	0.0839337	-0.541901	-0.367896
248	Pavir.Cb00621.1	Pavir.Cb00621.1	2258	32819	85	85	6	6	31.4	163781	1	1	1	807.927	1613.84	2	1613.84	0	0	60.27	21	28	3.1e-05	R	SLIEFGMAASER	N			File845 Spectrum438103 scans: 18995	7172.32	4969.99	7308.49	10899.1	140080	20984.4	9692.19	3061.84	12.8082	12.279	12.8354	13.4119	17.0959	14.357	13.2426	11.5802	12.8336	-0.0254091	-0.554605	0.00172493
248	Pavir.Cb00621.1	Pavir.Cb00621.1	2258	32819	85	85	6	6	31.4	163789	1	1	1	807.927	1613.84	2	1613.84	0.0011	0	54.28	24	28	0.00013	R	SLIEFGMAASER	N			File845 Spectrum438083 scans: 18974	6685.45	4467.6	3803.69	10990.3	145495	22962.4	8293.7	3745.73	12.7068	12.1253	11.8932	13.4239	17.1506	14.487	13.0178	11.871	12.5373	0.169505	-0.412019	-0.644119
248	Pavir.Cb00621.1	Pavir.Cb00621.1	2258	32819	85	85	6	6	31.4	148297	1	1	1	524.926	1571.76	3	1571.76	-0.0003	0	46.41		24	0.00036	K	DLQSMPYQDR	F	Oxidation (M)	0.0000300000.0	File830 Spectrum75993 scans: 5752	6652.7	6645.72	13075.6	6117.01	29311	29026.3	18175	11368.4	12.6997	12.6982	13.6746	12.5786	14.8392	14.8251	14.1497	13.4727	12.9128	-0.213061	-0.214575	0.761809
248	Pavir.Cb00621.1	Pavir.Cb00621.1	2258	32819	85	85	6	6	31.4	431175	1	1	1	814.977	3255.88	4	3255.88	-0.0075	0	44.57		25	0.0006	R	SGLQFDLLVKPVPGTTSEQLSK	L			File829 Spectrum65685 scans: 20778	6507.93	7444.33	9960.27	5918.17	20748.5	18243.1	15356.3	5496.95	12.668	12.8619	13.282	12.5309	14.3407	14.1551	13.9065	12.4244	12.8357	-0.16772	0.0262222	0.446266
248	Pavir.Cb00621.1	Pavir.Cb00621.1	2258	32819	85	85	6	6	31.4	142231	1	1	1	778.888	1555.76	2	1555.76	0.0016	0	29.23	25	26	0.025	K	DLQSMPYQDR	F			File834 Spectrum174034 scans: 9574	6175.4	9198.15	12022.2	7921.8	21707.9	17949	15575.3	9489.34	12.5923	13.1671	13.5534	12.9516	14.4059	14.1316	13.927	13.2121	13.0661	-0.473801	0.101011	0.487295
248	Pavir.Cb00621.1	Pavir.Cb00621.1	2258	32819	85	85	6	6	31.4	169314	1	1	1	815.924	1629.83	2	1629.83	0.0004	0	41.5		28	0.0023	R	SLIEFGMAASER	N	Oxidation (M)	0.000000300000.0	File842 Spectrum363648 scans: 15015	6070.03	4885.22	8507.33	13774.9	121425	23312.5	8537.69	5348.96	12.5675	12.2542	13.0545	13.7498	16.8897	14.5088	13.0596	12.385	12.9065	-0.338996	-0.652278	0.148006
248	Pavir.Cb00621.1	Pavir.Cb00621.1	2258	32819	85	85	6	6	31.4	163782	1	1	1	807.927	1613.84	2	1613.84	0	0	69.83	25	28	3.5e-06	R	SLIEFGMAASER	N			File845 Spectrum438057 scans: 18946	6002.94	5302.93	4305.41	10102.9	124564	24001.4	7081.84	4817.54	12.5515	12.3726	12.0719	13.3025	16.9265	14.5508	12.7899	12.2341	12.5746	-0.0231572	-0.202036	-0.502676
248	Pavir.Cb00621.1	Pavir.Cb00621.1	2258	32819	85	85	6	6	31.4	431179	1	1	1	652.184	3255.88	5	3255.88	-0.0001	0	34.52		24	0.0052	R	SGLQFDLLVKPVPGTTSEQLSK	L			File829 Spectrum65493 scans: 20573	5836	4334.68	15500.5	4130.44	25684.2	29809.7	20183.3	6850.17	12.5108	12.0817	13.92	12.0121	14.6486	14.8635	14.3009	12.7419	12.6311	-0.120382	-0.549436	1.28888
248	Pavir.Cb00621.1	Pavir.Cb00621.1	2258	32819	85	85	6	6	31.4	163790	1	1	1	538.954	1613.84	3	1613.84	0.0012	0	30.24	17	28	0.032	R	SLIEFGMAASER	N			File846 Spectrum462224 scans: 19084	5667.25	3040.14	4078.04	3939.77	9782.67	3573.32	3442.05	4463.26	12.4684	11.5699	11.9937	11.9439	13.256	11.803	11.7491	12.1239	11.994	0.474455	-0.424056	-0.000316251
248	Pavir.Cb00621.1	Pavir.Cb00621.1	2258	32819	85	85	6	6	31.4	163776	1	1	1	807.927	1613.84	2	1613.84	-0.0006	0	68.14	26	28	5.1e-06	R	SLIEFGMAASER	N			File845 Spectrum438068 scans: 18958	5477.08	4413.99	6112.57	10738.7	141234	24381	7616.08	5513.77	12.4192	12.1079	12.5776	13.3905	17.1077	14.5735	12.8948	12.4288	12.6238	-0.204596	-0.515921	-0.0462262
248	Pavir.Cb00621.1	Pavir.Cb00621.1	2258	32819	85	85	6	6	31.4	163771	1	1	1	807.926	1613.84	2	1613.84	-0.0015	0	56.94	25	27	6.4e-05	R	SLIEFGMAASER	N			File845 Spectrum438044 scans: 18932	5450.14	4667.78	6349.45	10806.8	121071	21273.8	6299.55	3598.86	12.4121	12.1885	12.6324	13.3996	16.8855	14.3768	12.621	11.8133	12.6582	-0.246088	-0.469643	-0.0257497
248	Pavir.Cb00621.1	Pavir.Cb00621.1	2258	32819	85	85	6	6	31.4	169311	1	1	1	815.923	1629.83	2	1629.83	-0.002	0	45.42	16	27	0.00085	R	SLIEFGMAASER	N	Oxidation (M)	0.000000300000.0	File842 Spectrum363665 scans: 15033	5403.59	5083.74	7805.71	13750.9	103440	22592.6	9460.44	4732.34	12.3997	12.3117	12.9303	13.7472	16.6584	14.4636	13.2077	12.2083	12.8472	-0.44753	-0.535559	0.0830828
248	Pavir.Cb00621.1	Pavir.Cb00621.1	2258	32819	85	85	6	6	31.4	163780	1	1	1	807.927	1613.84	2	1613.84	0	0	54.04	27	28	0.00013	R	SLIEFGMAASER	N			File845 Spectrum438149 scans: 19044	5153.1	2140.09	5242.17	8512.44	91492.7	17342	4746.19	3817.48	12.3312	11.0635	12.3559	13.0554	16.4814	14.082	12.2126	11.8984	12.2015	0.129729	-1.13804	0.154452
248	Pavir.Cb00621.1	Pavir.Cb00621.1	2258	32819	85	85	6	6	31.4	163793	1	1	1	807.928	1613.84	2	1613.84	0.0032	0	62.23	25	28	2e-05	R	SLIEFGMAASER	N			File845 Spectrum438031 scans: 18918	4727.05	5646.71	4818.83	10537.5	108853	21302.6	6007.23	4611.25	12.2067	12.4632	12.2345	13.3632	16.732	14.3787	12.5525	12.1709	12.5669	-0.360183	-0.103712	-0.33244
248	Pavir.Cb00621.1	Pavir.Cb00621.1	2258	32819	85	85	6	6	31.4	163784	1	1	1	807.927	1613.84	2	1613.84	0.0001	0	55.19	25	28	0.0001	R	SLIEFGMAASER	N			File845 Spectrum438126 scans: 19020	4712.32	2363.8	3881.12	11075.3	134033	24138.7	6031.29	3843.27	12.2022	11.2069	11.9223	13.4351	17.0322	14.5591	12.5582	11.9081	12.1916	0.0106142	-0.984713	-0.26935
248	Pavir.Cb00621.1	Pavir.Cb00621.1	2258	32819	85	85	6	6	31.4	163783	1	1	1	538.954	1613.84	3	1613.84	0	0	43.16	23	28	0.0016	R	SLIEFGMAASER	N			File846 Spectrum462398 scans: 19270	4520.94	3598.66	1975.17	5135.1	14228.9	4415.69	3212.46	3337.64	12.1424	11.8132	10.9478	12.3262	13.7965	12.1084	11.6495	11.7046	11.8074	0.33501	0.00584542	-0.859634
248	Pavir.Cb00621.1	Pavir.Cb00621.1	2258	32819	85	85	6	6	31.4	163778	1	1	1	538.953	1613.84	3	1613.84	-0.0005	0	45.32	23	28	0.00099	R	SLIEFGMAASER	N			File845 Spectrum438042 scans: 18930	4041.56	1836.39	2615.74	3454.04	8144.66	3258.09	2295.01	1522.51	11.9807	10.8427	11.353	11.7541	12.9916	11.6698	11.1643	10.5722	11.4826	0.498089	-0.639949	-0.129603
248	Pavir.Cb00621.1	Pavir.Cb00621.1	2258	32819	85	85	6	6	31.4	431176	1	1	1	652.184	3255.88	5	3255.88	-0.0028	0	24.95		24	0.048	R	SGLQFDLLVKPVPGTTSEQLSK	L			File829 Spectrum65670 scans: 20762	4007.9	5984.5	6624.15	3871.18	15840.4	10940.7	8802.3	4013.68	11.9686	12.547	12.6935	11.9186	13.9513	13.4174	13.1037	11.9707	12.2819	-0.3133	0.265084	0.41159
248	Pavir.Cb00621.1	Pavir.Cb00621.1	2258	32819	85	85	6	6	31.4	163773	1	1	1	538.953	1613.84	3	1613.84	-0.0009	0	28.18	23	28	0.048	R	SLIEFGMAASER	N			File845 Spectrum438148 scans: 19043	3659.96	1668.39	2229.76	3240.59	6568.26	3090.42	2105.64	1492.24	11.8376	10.7042	11.1227	11.662	12.6813	11.5936	11.04	10.5433	11.3316	0.50597	-0.627404	-0.208966
248	Pavir.Cb00621.1	Pavir.Cb00621.1	2258	32819	85	85	6	6	31.4	148286	1	1	1	524.925	1571.75	3	1571.76	-0.0029	0	30.5	21	24	0.014	K	DLQSMPYQDR	F	Oxidation (M)	0.0000300000.0	File829 Spectrum51627 scans: 5783	3457.48	12603.2	10103.9	7329.74	11600.3	9647.84	6276.16	7075.52	11.7555	13.6215	13.3026	12.8395	13.5019	13.236	12.6157	12.7886	12.8798	-1.12429	0.741704	0.422836
248	Pavir.Cb00621.1	Pavir.Cb00621.1	2258	32819	85	85	6	6	31.4	163791	1	1	1	538.954	1613.84	3	1613.84	0.0021	0	32.94	25	28	0.017	R	SLIEFGMAASER	N			File845 Spectrum438023 scans: 18910	3420.83	2319.36	2501.99	1623.69	6173.93	2470.2	1776.68	1830.82	11.7401	11.1795	11.2889	10.6651	12.592	11.2704	10.795	10.8383	11.2184	0.52174	-0.0388786	0.0704673
248	Pavir.Cb00621.1	Pavir.Cb00621.1	2258	32819	85	85	6	6	31.4	163785	1	1	1	538.954	1613.84	3	1613.84	0.0002	0	41.89	23	28	0.0022	R	SLIEFGMAASER	N			File845 Spectrum438056 scans: 18945	3003.65	1279.38	3604.03	1897.71	7981.14	3132.14	2314.95	1662.65	11.5525	10.3212	11.8154	10.89	12.9624	11.6129	11.1768	10.6993	11.1448	0.407709	-0.823559	0.670601
248	Pavir.Cb00621.1	Pavir.Cb00621.1	2258	32819	85	85	6	6	31.4	163777	1	1	1	538.953	1613.84	3	1613.84	-0.0005	0	37.11	25	28	0.0065	R	SLIEFGMAASER	N			File845 Spectrum438128 scans: 19022	2783.77	2290.51	3395.72	2915.83	7799.23	1844.96	2109.9	2586.47	11.4428	11.1615	11.7295	11.5097	12.9291	10.8494	11.043	11.3368	11.4609	-0.0180445	-0.299416	0.268635
248	Pavir.Cb00621.1	Pavir.Cb00621.1	2258	32819	85	85	6	6	31.4	174143	1	1	1	549.312	1644.91	3	1644.92	-0.005	0	45.38		29	0.0014	R	VGEVVELGPVMGR	G			File842 Spectrum366845 scans: 18425	2637.54	2248.38	1777.36	2582.13	3798.42	1837.53	3431.45	1476.54	11.365	11.1347	10.7955	11.3343	11.8912	10.8435	11.7446	10.528	11.1574	0.207597	-0.022706	-0.361857
248	Pavir.Cb00621.1	Pavir.Cb00621.1	2258	32819	85	85	6	6	31.4	163787	1	1	1	538.954	1613.84	3	1613.84	0.0008	0	28.76	16	28	0.045	R	SLIEFGMAASER	N			File845 Spectrum438104 scans: 18996	2462.89	2937.48	2340.29	2914.22	7852.01	2217.66	3740.98	3090.99	11.2661	11.5204	11.1925	11.5089	12.9388	11.1148	11.8692	11.5939	11.372	-0.105828	0.148395	-0.179494
248	Pavir.Cb00621.1	Pavir.Cb00621.1	2258	32819	85	85	6	6	31.4	278225	1	1	1	678.359	2032.06	3	2032.06	-0.0041	0	62.73	20	30	2.8e-05	R	AVQTQGAGVQTQQGGAAR	K	Deamidated (NQ)	0.000000000000100000.0	File831 Spectrum98145 scans: 4380	1312.88	2517.87	1285.96	1961.45	2258.68	1687.11	2314.42	1794.95	10.3585	11.298	10.3286	10.9377	11.1413	10.7203	11.1764	10.8097	10.7307	-0.372192	0.567278	-0.402079
248	Pavir.Cb00621.1	Pavir.Cb00621.1	2258	32819	85	85	6	6	31.4	278228	1	1	1	678.36	2032.06	3	2032.06	-0.0019	0	59	18	30	6.4e-05	R	AVQTQGAGVQTQQGGAAR	K	Deamidated (NQ)	0.001000000000000000.0	File831 Spectrum98191 scans: 4429	1203.43	2511.47	2193.08	3813.39	2868.05	3001.62	3746.49	2996.81	10.2329	11.2943	11.0987	11.8969	11.4859	11.5515	11.8713	11.5492	11.1307	-0.897775	0.163603	-0.0319721
248	Pavir.Cb00621.1	Pavir.Cb00621.1	2258	32819	85	85	6	6	31.4	278230	1	1	1	678.36	2032.06	3	2032.06	-0.0018	0	51.58	16	30	0.00035	R	AVQTQGAGVQTQQGGAAR	K	Deamidated (NQ)	0.000000000000100000.0	File831 Spectrum98104 scans: 4336	1030.03	1665.45	1023.67	1307.77	1280.56	1808.61	1552.1	1254.56	10.0085	10.7017	9.99954	10.3529	10.3226	10.8207	10.6	10.293	10.2656	-0.257183	0.436046	-0.26611
248	Pavir.Cb00621.1	Pavir.Cb00621.1	2258	32819	85	85	6	6	31.4	278235	1	1	1	678.361	2032.06	3	2032.06	0.0012	0	50.55	18	30	0.00045	R	AVQTQGAGVQTQQGGAAR	K	Deamidated (NQ)	0.000000000000100000.0	File831 Spectrum98110 scans: 4343	983.42	1756.15	1325.34	1644.53	1596.75	1713.93	2533.54	1002.52	9.94166	10.7782	10.3721	10.6835	10.6409	10.7431	11.3069	9.96942	10.4439	-0.502204	0.334332	-0.0717231
248	Pavir.Cb00621.1	Pavir.Cb00621.1	2258	32819	85	85	6	6	31.4	278000	1	1	1	678.031	2031.07	3	2031.08	-0.0063	0	83.32	21	30	2.5e-07	R	AVQTQGAGVQTQQGGAAR	K			File833 Spectrum144884 scans: 4029	892.11	527.773	3560.98	734.844	5570.04	3658.5	6876.06	1112.17	9.80108	9.04377	11.7981	9.52129	12.4435	11.837	12.7474	10.1192	10.0411	-0.239973	-0.997278	1.75701
248	Pavir.Cb00621.1	Pavir.Cb00621.1	2258	32819	85	85	6	6	31.4	278227	1	1	1	678.36	2032.06	3	2032.06	-0.0032	0	41.45		30	0.0037	R	AVQTQGAGVQTQQGGAAR	K	Deamidated (NQ)	0.000000000000100000.0	File832 Spectrum121511 scans: 4316	689.497	1004.64	479.201	541.781	1163.88	684.82	302.349	473.234	9.4294	9.97246	8.90449	9.08157	10.1847	9.41958	8.24007	8.88641	9.34698	0.0824221	0.625481	-0.44249
248	Pavir.Cb00621.1	Pavir.Cb00621.1	2258	32819	85	85	6	6	31.4	278031	1	1	1	678.032	2031.07	3	2031.08	-0.0016	0	69.8		30	5.9e-06	R	AVQTQGAGVQTQQGGAAR	K			File834 Spectrum168871 scans: 4057	582.148	1015.95	2014.26	1026.89	5615.46	2330.8	3797.87	1535.96	9.18524	9.98862	10.976	10.0041	12.4552	11.1866	11.891	10.5849	10.0385	-0.853249	-0.0498705	0.937541
248	Pavir.Cb00621.1	Pavir.Cb00621.1	2258	32819	85	85	6	6	31.4	278046	1	1	1	678.033	2031.08	3	2031.08	0.0008	0	70.18		30	5.3e-06	R	AVQTQGAGVQTQQGGAAR	K			File834 Spectrum168909 scans: 4099	476.828	605.4	424.557	466.764	1748.22	892.838	1310.25	480.521	8.89732	9.24175	8.72982	8.86655	10.7717	9.80225	10.3556	8.90846	8.93386	-0.0365349	0.307887	-0.204043
248	Pavir.Cb00621.1	Pavir.Cb00621.1	2258	32819	85	85	6	6	31.4	278019	1	1	1	678.032	2031.07	3	2031.08	-0.0032	0	70.16	23	30	5.3e-06	R	AVQTQGAGVQTQQGGAAR	K			File833 Spectrum144973 scans: 4124	467.555	729.393	701.313	933.156	1686.11	1081.06	2284.63	702.395	8.86899	9.51055	9.45391	9.86597	10.7195	10.0782	11.1577	9.45614	9.42486	-0.555866	0.0856944	0.0290558
248	Pavir.Cb00621.1	Pavir.Cb00621.1	2258	32819	85	85	6	6	31.4	278045	1	1	1	678.033	2031.08	3	2031.08	0.0006	0	41.8	18	30	0.0037	R	AVQTQGAGVQTQQGGAAR	K			File833 Spectrum145011 scans: 4164	392.713	1076.59	642.382	1110.24	546.18	454.554	401.463	642.862	8.61733	10.0723	9.32729	10.1167	9.09323	8.82831	8.64913	9.32837	9.53338	-0.916052	0.538873	-0.206096
248	Pavir.Cb00621.1	Pavir.Cb00621.1	2258	32819	85	85	6	6	31.4	278034	1	1	1	678.032	2031.08	3	2031.08	-0.0012	0	69.01	20	30	7.1e-06	R	AVQTQGAGVQTQQGGAAR	K			File833 Spectrum144990 scans: 4142	350.542	1105.75	661.279	1059.57	854.017	711.672	726.526	925.614	8.45344	10.1108	9.36912	10.0493	9.73812	9.47507	9.50487	9.85427	9.49566	-1.04222	0.615156	-0.126545
248	Pavir.Cb00621.1	Pavir.Cb00621.1	2258	32819	85	85	6	6	31.4	278040	1	1	1	678.033	2031.08	3	2031.08	-0.0007	0	55.76		30	0.00015	R	AVQTQGAGVQTQQGGAAR	K			File834 Spectrum168969 scans: 4165	192.577	298.025	255.281	266.79	484.057	423.71	333.35	283.2	7.58929	8.21929	7.99594	8.05956	8.91903	8.72693	8.3809	8.14568	7.96602	-0.376729	0.253268	0.029922
299	Pavir.Ca01780.1	Pavir.Ca01780.1	1970	28185	94	94	9	9	47.7	287421	1	1	1	693.022	2076.04	3	2076.04	-0.0004	0	33.53	16	28	0.017	K	DAVMNTLGMSGDNK	E	Oxidation (M)	0.00000000300000.0	File839 Spectrum291378 scans: 11280	44155.4	45981.9	60738.8	39369.1	131164	109245	64886.7	67761.8	15.4303	15.4888	15.8903	15.2648	17.001	16.7372	15.9856	16.0482	15.5185	-0.0882445	-0.029768	0.371784
299	Pavir.Ca01780.1	Pavir.Ca01780.1	1970	28185	94	94	9	9	47.7	283983	1	1	1	688.017	2061.03	3	2061.03	-0.0037	0	53.07	19	28	0.00017	K	DAVMNTLGMSGDNK	E	Deamidated (NQ)	0.00001000000000.0	File834 Spectrum176274 scans: 11964	22662.9	10399.1	10106.2	13953.9	72632.7	75809.9	43083.1	48836.9	14.468	13.3442	13.303	13.7684	16.1483	16.2101	15.3948	15.5757	13.7209	0.74716	-0.376721	-0.417935
299	Pavir.Ca01780.1	Pavir.Ca01780.1	1970	28185	94	94	9	9	47.7	290877	1	1	1	698.352	2092.03	3	2092.04	-0.0062	0	40.26	18	28	0.0031	K	DAVMNTLGMSGDNK	E	2 Oxidation (M)	0.00030000300000.0	File834 Spectrum171940 scans: 7341	21784.6	51724.2	30454.2	16982.5	96436.9	89068.4	51125.6	66831.2	14.411	15.6586	14.8944	14.0518	16.5573	16.4426	15.6418	16.0282	14.7539	-0.3429	0.904629	0.140429
299	Pavir.Ca01780.1	Pavir.Ca01780.1	1970	28185	94	94	9	9	47.7	283982	1	1	1	688.017	2061.03	3	2061.03	-0.0045	0	55.38	17	28	9.8e-05	K	DAVMNTLGMSGDNK	E	Deamidated (NQ)	0.00001000000000.0	File834 Spectrum176304 scans: 11996	20059	6265.02	16281.7	10003	76681.8	70505.7	42609.3	45529.5	14.292	12.6131	13.991	13.2882	16.2266	16.1055	15.3789	15.4745	13.546	0.745916	-0.932941	0.444918
299	Pavir.Ca01780.1	Pavir.Ca01780.1	1970	28185	94	94	9	9	47.7	283782	1	1	1	687.688	2060.04	3	2060.05	-0.0056	0	50.25	16	29	0.00039	K	DAVMNTLGMSGDNK	E			File842 Spectrum362099 scans: 13363	15980.1	9070.06	16203.9	17832.7	50054.8	50236.1	36057.7	42401.5	13.964	13.1469	13.9841	14.1222	15.6112	15.6164	15.138	15.3718	13.8043	0.159693	-0.657397	0.17976
299	Pavir.Ca01780.1	Pavir.Ca01780.1	1970	28185	94	94	9	9	47.7	283779	1	1	1	687.688	2060.04	3	2060.05	-0.0076	0	35.93		29	0.01	K	DAVMNTLGMSGDNK	E			File842 Spectrum362085 scans: 13348	15796.2	14005.7	18722.7	20440.5	35014.4	35034.9	25840.1	32614	13.9473	13.7737	14.1925	14.3191	15.0957	15.0965	14.6573	14.9932	14.0582	-0.110872	-0.284443	0.134336
299	Pavir.Ca01780.1	Pavir.Ca01780.1	1970	28185	94	94	9	9	47.7	283984	1	1	1	688.018	2061.03	3	2061.03	-0.0008	0	62.23	19	28	2.1e-05	K	DAVMNTLGMSGDNK	E	Deamidated (NQ)	0.00001000000000.0	File834 Spectrum176336 scans: 12030	15315.8	6987.97	2588.27	8882.17	45672.9	38173.1	19544.8	25382.6	13.9027	12.7707	11.3378	13.1167	15.479	15.2203	14.2545	14.6316	12.782	1.12077	-0.0113078	-1.44419
299	Pavir.Ca01780.1	Pavir.Ca01780.1	1970	28185	94	94	9	9	47.7	287411	1	1	1	693.02	2076.04	3	2076.04	-0.0046	0	50.23	17	28	0.00036	K	DAVMNTLGMSGDNK	E	Oxidation (M)	0.00030000000000.0	File841 Spectrum335127 scans: 9124	14403.9	1.83542	1863.26	6452.08	59930.4	62154.3	35783.1	38354.2	13.8142	0.876108	10.8636	12.6555	15.871	15.9236	15.127	15.2271	9.55236	4.26181	-8.67625	1.31125
299	Pavir.Ca01780.1	Pavir.Ca01780.1	1970	28185	94	94	9	9	47.7	287412	1	1	1	693.02	2076.04	3	2076.04	-0.0046	0	38.7		28	0.0051	K	DAVMNTLGMSGDNK	E	Oxidation (M)	0.00030000000000.0	File836 Spectrum223986 scans: 10105	13957.2	2001.43	7083.4	6842.04	51057.5	75454.1	26743.8	45439.8	13.7687	10.9668	12.7902	12.7402	15.6398	16.2033	14.7069	15.4717	12.5665	1.20223	-1.59968	0.223731
299	Pavir.Ca01780.1	Pavir.Ca01780.1	1970	28185	94	94	9	9	47.7	287414	1	1	1	693.021	2076.04	3	2076.04	-0.0033	0	53.3	17	28	0.00018	K	DAVMNTLGMSGDNK	E	Oxidation (M)	0.00030000000000.0	File841 Spectrum335038 scans: 9029	12949.7	1108.34	6710.34	7061.86	83225	75307.5	39733.3	44430.8	13.6606	10.1142	12.7122	12.7858	16.3447	16.2005	15.2781	15.4393	12.3182	1.34243	-2.20402	0.393966
299	Pavir.Ca01780.1	Pavir.Ca01780.1	1970	28185	94	94	9	9	47.7	287417	1	1	1	693.021	2076.04	3	2076.04	-0.002	0	30.9	24	29	0.032	K	DAVMNTLGMSGDNK	E	Oxidation (M)	0.00030000000000.0	File841 Spectrum334979 scans: 8966	12752.4	10184.4	9421.17	10699.4	32497.2	33135	22357.6	22288.3	13.6385	13.3141	13.2017	13.3852	14.988	15.0161	14.4485	14.444	13.3849	0.253608	-0.070801	-0.183182
299	Pavir.Ca01780.1	Pavir.Ca01780.1	1970	28185	94	94	9	9	47.7	283792	1	1	1	687.69	2060.05	3	2060.05	-0.0006	0	43.07	16	29	0.0021	K	DAVMNTLGMSGDNK	E			File842 Spectrum362167 scans: 13435	12609.9	8158.48	10269.3	14396.3	26209.7	24498.9	20479.8	18397.9	13.6223	12.9941	13.3261	13.8134	14.6778	14.5804	14.3219	14.1673	13.439	0.183311	-0.44487	-0.1129
299	Pavir.Ca01780.1	Pavir.Ca01780.1	1970	28185	94	94	9	9	47.7	287418	1	1	1	693.021	2076.04	3	2076.04	-0.002	0	52.02	24	29	0.00025	K	DAVMNTLGMSGDNK	E	Oxidation (M)	0.00030000000000.0	File836 Spectrum224107 scans: 10234	12507.1	13125.5	9516.65	10972.4	49882.9	59848.9	27121.5	39587.5	13.6105	13.6801	13.2162	13.4216	15.6063	15.869	14.7271	15.2728	13.4821	0.128365	0.197993	-0.265855
299	Pavir.Ca01780.1	Pavir.Ca01780.1	1970	28185	94	94	9	9	47.7	290886	1	1	1	698.352	2092.04	3	2092.04	-0.0036	0	44.91		28	0.0011	K	DAVMNTLGMSGDNK	E	2 Oxidation (M)	0.00030000300000.0	File834 Spectrum171892 scans: 7290	12223.8	63256.8	11396.3	25092.2	79220	105093	34339.4	64454.4	13.5774	15.9489	13.4763	14.615	16.2736	16.6813	15.0676	15.976	14.4044	-0.826986	1.54454	-0.928114
299	Pavir.Ca01780.1	Pavir.Ca01780.1	1970	28185	94	94	9	9	47.7	287419	1	1	1	693.021	2076.04	3	2076.04	-0.0015	0	55.57	19	29	0.00011	K	DAVMNTLGMSGDNK	E	Oxidation (M)	0.00000000300000.0	File839 Spectrum291466 scans: 11374	12142.5	932.775	28747.7	11262.1	233978	208019	112522	101620	13.5678	9.86539	14.8112	13.4592	17.836	17.6664	16.7799	16.6328	12.9259	0.641898	-3.06049	1.88528
299	Pavir.Ca01780.1	Pavir.Ca01780.1	1970	28185	94	94	9	9	47.7	290871	1	1	1	698.35	2092.03	3	2092.04	-0.0118	0	36.99		28	0.0064	K	DAVMNTLGMSGDNK	E	2 Oxidation (M)	0.00030000300000.0	File834 Spectrum171971 scans: 7374	11932.2	33833.6	25064.1	17386	65320.4	81043.2	41195.6	50215.9	13.5426	15.0462	14.6133	14.0856	15.9952	16.3064	15.3302	15.6159	14.3219	-0.779361	0.724241	0.291407
299	Pavir.Ca01780.1	Pavir.Ca01780.1	1970	28185	94	94	9	9	47.7	283780	1	1	1	687.688	2060.04	3	2060.05	-0.0076	0	57.18	17	29	7.6e-05	K	DAVMNTLGMSGDNK	E			File841 Spectrum339605 scans: 13900	9533.64	4493.05	7156.55	6193.56	29051.8	30759.7	18292.9	22445.2	13.2188	12.1335	12.805	12.5966	14.8263	14.9088	14.159	14.4541	12.6885	0.530338	-0.554994	0.116576
299	Pavir.Ca01780.1	Pavir.Ca01780.1	1970	28185	94	94	9	9	47.7	287413	1	1	1	693.02	2076.04	3	2076.04	-0.0044	0	53.46		28	0.00017	K	DAVMNTLGMSGDNK	E	Oxidation (M)	0.00030000000000.0	File836 Spectrum224065 scans: 10189	9268.35	12224.3	10376.8	8559.32	28560.2	40093.4	18706.8	23487.9	13.1781	13.5775	13.3411	13.0633	14.8017	15.2911	14.1913	14.5196	13.29	-0.111882	0.287488	0.0510908
299	Pavir.Ca01780.1	Pavir.Ca01780.1	1970	28185	94	94	9	9	47.7	283781	1	1	1	687.688	2060.04	3	2060.05	-0.006	0	43.08	16	29	0.002	K	DAVMNTLGMSGDNK	E			File841 Spectrum339587 scans: 13881	9038.16	4456.37	5638.99	6535.3	35058	32987.3	17946.2	21043.8	13.1418	12.1217	12.4612	12.674	15.0975	15.0096	14.1314	14.3611	12.5997	0.542132	-0.478027	-0.138461
299	Pavir.Ca01780.1	Pavir.Ca01780.1	1970	28185	94	94	9	9	47.7	283778	1	1	1	687.686	2060.04	3	2060.05	-0.012	0	39.36		28	0.0045	K	DAVMNTLGMSGDNK	E			File841 Spectrum339626 scans: 13923	8942.89	5498.62	9282.82	9515.57	26882.7	29318.8	24371.4	17927	13.1265	12.4249	13.1803	13.2161	14.7144	14.8395	14.5729	14.1298	12.987	0.139575	-0.562097	0.193398
299	Pavir.Ca01780.1	Pavir.Ca01780.1	1970	28185	94	94	9	9	47.7	287410	1	1	1	693.02	2076.04	3	2076.04	-0.005	0	53.21	17	28	0.00018	K	DAVMNTLGMSGDNK	E	Oxidation (M)	0.00030000000000.0	File836 Spectrum224034 scans: 10156	8713.7	3921.29	6711.89	7517.55	37888.1	64326.6	27070.8	35416.8	13.0891	11.9371	12.7125	12.876	15.2095	15.9731	14.7244	15.1121	12.6537	0.435386	-0.716571	0.058821
299	Pavir.Ca01780.1	Pavir.Ca01780.1	1970	28185	94	94	9	9	47.7	287415	1	1	1	693.021	2076.04	3	2076.04	-0.0024	0	53.6		28	0.00017	K	DAVMNTLGMSGDNK	E	Oxidation (M)	0.00030000000000.0	File841 Spectrum335176 scans: 9176	8330.91	4902.45	5543.28	2485.05	15887.2	16956.9	11764.5	13722.8	13.0243	12.2593	12.4365	11.2791	13.9556	14.0496	13.5221	13.7443	12.2498	0.774476	0.0095063	0.186743
299	Pavir.Ca01780.1	Pavir.Ca01780.1	1970	28185	94	94	9	9	47.7	287420	1	1	1	693.022	2076.04	3	2076.04	-0.0006	0	53.3	24	28	0.00018	K	DAVMNTLGMSGDNK	E	Oxidation (M)	0.00000000300000.0	File839 Spectrum291498 scans: 11408	7721.43	5646.73	13580.2	11670.5	93738	69272.4	45440.2	48489.3	12.9147	12.4632	13.7292	13.5106	16.5163	16.08	15.4717	15.5654	13.1544	-0.239759	-0.691212	0.574808
299	Pavir.Ca01780.1	Pavir.Ca01780.1	1970	28185	94	94	9	9	47.7	291007	1	1	1	698.68	2093.02	3	2093.02	-0.0043	0	51.87		27	0.0002	K	DAVMNTLGMSGDNK	E	Deamidated (NQ); 2 Oxidation (M)	0.00031000300000.0	File829 Spectrum52518 scans: 6733	7590.63	7140.78	9026.01	7175.39	36119.1	37192.3	20312.2	24272.7	12.89	12.8019	13.1399	12.8088	15.1405	15.1827	14.3101	14.567	12.9101	-0.0201412	-0.10828	0.229727
299	Pavir.Ca01780.1	Pavir.Ca01780.1	1970	28185	94	94	9	9	47.7	290880	1	1	1	698.352	2092.03	3	2092.04	-0.0052	0	47.99	17	28	0.00054	K	DAVMNTLGMSGDNK	E	2 Oxidation (M)	0.00030000300000.0	File834 Spectrum172107 scans: 7519	6765.14	5644.03	8980.01	8862	46733.8	36243	19550.3	27411.9	12.7239	12.4625	13.1325	13.1134	15.5122	15.1454	14.2549	14.7425	12.8581	-0.134179	-0.395574	0.274418
299	Pavir.Ca01780.1	Pavir.Ca01780.1	1970	28185	94	94	9	9	47.7	290879	1	1	1	698.352	2092.03	3	2092.04	-0.0056	0	29.13	15	28	0.042	K	DAVMNTLGMSGDNK	E	2 Oxidation (M)	0.00030000300000.0	File838 Spectrum265706 scans: 7276	6176.54	10897.4	8268.37	6482.4	26400.9	30308.6	15968.1	21155.9	12.5926	13.4117	13.0134	12.6623	14.6883	14.8874	13.9629	14.3688	12.92	-0.32741	0.491696	0.0933945
299	Pavir.Ca01780.1	Pavir.Ca01780.1	1970	28185	94	94	9	9	47.7	283789	1	1	1	687.689	2060.05	3	2060.05	-0.0025	0	45.05		29	0.0013	K	DAVMNTLGMSGDNK	E			File841 Spectrum339514 scans: 13803	6068.79	3287.8	5544.68	4071.43	21823.5	21831.8	11997.9	11603.8	12.5672	11.6829	12.4369	11.9913	14.4136	14.4141	13.5505	13.5023	12.1696	0.397615	-0.48667	0.26731
299	Pavir.Ca01780.1	Pavir.Ca01780.1	1970	28185	94	94	9	9	47.7	287424	1	1	1	693.023	2076.05	3	2076.04	0.0018	0	45.41	18	29	0.0011	K	DAVMNTLGMSGDNK	E	Oxidation (M)	0.00000000300000.0	File839 Spectrum291530 scans: 11442	5938.09	10956.1	8162.35	5126.23	40470	36161.1	18706.9	24059.7	12.5358	13.4195	12.9948	12.3237	15.3046	15.1422	14.1913	14.5543	12.8184	-0.282638	0.60103	0.176347
299	Pavir.Ca01780.1	Pavir.Ca01780.1	1970	28185	94	94	9	9	47.7	287566	1	1	1	693.349	2077.03	3	2077.03	-0.0028	0	56.34		28	7.5e-05	K	DAVMNTLGMSGDNK	E	Deamidated (NQ); Oxidation (M)	0.00031000000000.0	File831 Spectrum102644 scans: 9179	5517.56	8586.35	3722.46	3816.13	13958.1	14488	8135.51	10525.3	12.4298	13.0678	11.862	11.8979	13.7688	13.8226	12.99	13.3616	12.3144	0.115419	0.753435	-0.452355
299	Pavir.Ca01780.1	Pavir.Ca01780.1	1970	28185	94	94	9	9	47.7	287423	1	1	1	693.022	2076.05	3	2076.04	0.0009	0	55.72	18	28	0.0001	K	DAVMNTLGMSGDNK	E	Oxidation (M)	0.00000000300000.0	File839 Spectrum291550 scans: 11463	5406.51	11218.6	11533.6	6096.78	24155.7	23259	12003.8	10914.3	12.4005	13.4536	13.4936	12.5738	14.5601	14.5055	13.5512	13.4139	12.9804	-0.57989	0.47324	0.513189
299	Pavir.Ca01780.1	Pavir.Ca01780.1	1970	28185	94	94	9	9	47.7	290891	1	1	1	698.354	2092.04	3	2092.04	-0.0003	0	44.86	23	28	0.0012	K	DAVMNTLGMSGDNK	E	2 Oxidation (M)	0.00030000300000.0	File838 Spectrum265749 scans: 7322	5054.42	12109.6	8659.13	8763.12	33053.2	32732.8	18478.1	23117.9	12.3033	13.5639	13.08	13.0972	15.0125	14.9984	14.1735	14.4967	13.0111	-0.707777	0.552758	0.0688985
299	Pavir.Ca01780.1	Pavir.Ca01780.1	1970	28185	94	94	9	9	47.7	291009	1	1	1	698.681	2093.02	3	2093.02	-0.0014	0	47.05		27	0.00062	K	DAVMNTLGMSGDNK	E	Deamidated (NQ); 2 Oxidation (M)	0.00031000300000.0	File829 Spectrum52444 scans: 6654	4361.37	6972.64	6424.17	10149.1	19828.8	21697	10687	19261.2	12.0906	12.7675	12.6493	13.3091	14.2753	14.4052	13.3836	14.2334	12.7041	-0.613537	0.063385	-0.0548093
299	Pavir.Ca01780.1	Pavir.Ca01780.1	1970	28185	94	94	9	9	47.7	290885	1	1	1	698.352	2092.04	3	2092.04	-0.0038	0	36.38		28	0.0077	K	DAVMNTLGMSGDNK	E	2 Oxidation (M)	0.00030000300000.0	File834 Spectrum172122 scans: 7535	4222.7	6789.86	7262.57	4692.33	31483	24583.3	14481.7	18969.7	12.044	12.7292	12.8263	12.1961	14.9423	14.5854	13.8219	14.2114	12.4489	-0.404916	0.280299	0.377397
299	Pavir.Ca01780.1	Pavir.Ca01780.1	1970	28185	94	94	9	9	47.7	287560	1	1	1	693.348	2077.02	3	2077.03	-0.0062	0	50.05	20	28	0.00032	K	DAVMNTLGMSGDNK	E	Deamidated (NQ); Oxidation (M)	0.00001000300000.0	File831 Spectrum102841 scans: 9389	4042.01	4998.53	4679.42	5969.16	17920.6	18192	9747.1	12747.4	11.9809	12.2873	12.1921	12.5433	14.1293	14.151	13.2508	13.6379	12.2509	-0.270036	0.0363954	-0.0587787
299	Pavir.Ca01780.1	Pavir.Ca01780.1	1970	28185	94	94	9	9	47.7	287559	1	1	1	693.348	2077.02	3	2077.03	-0.0062	0	54.05	20	28	0.00013	K	DAVMNTLGMSGDNK	E	Deamidated (NQ); Oxidation (M)	0.00001000300000.0	File831 Spectrum102852 scans: 9401	3764.85	6262.38	5473.73	5222.04	23169.2	21496.6	12258.8	18039.2	11.8784	12.6125	12.4183	12.3504	14.4999	14.3918	13.5815	14.1388	12.3149	-0.436518	0.2976	0.103414
299	Pavir.Ca01780.1	Pavir.Ca01780.1	1970	28185	94	94	9	9	47.7	290876	1	1	1	698.351	2092.03	3	2092.04	-0.0063	0	56.01	16	28	8.4e-05	K	DAVMNTLGMSGDNK	E	2 Oxidation (M)	0.00030000300000.0	File841 Spectrum332637 scans: 6468	3514.09	2224.2	2511.05	4131.73	35807.3	36740.7	20685.9	19294.8	11.7789	11.1191	11.2941	12.0125	15.128	15.1651	14.3364	14.2359	11.5512	0.227782	-0.43208	-0.257079
299	Pavir.Ca01780.1	Pavir.Ca01780.1	1970	28185	94	94	9	9	47.7	290890	1	1	1	698.353	2092.04	3	2092.04	-0.0007	0	46.6	18	28	0.00078	K	DAVMNTLGMSGDNK	E	2 Oxidation (M)	0.00030000300000.0	File834 Spectrum172143 scans: 7557	2622.58	6491.97	3881.73	4229.04	17074.3	14269.1	7938.98	11042.1	11.3568	12.6644	11.9225	12.0461	14.0595	13.8006	12.9547	13.4307	11.9975	-0.64068	0.666988	-0.0749696
299	Pavir.Ca01780.1	Pavir.Ca01780.1	1970	28185	94	94	9	9	47.7	291008	1	1	1	698.681	2093.02	3	2093.02	-0.0032	0	56.88		27	6.3e-05	K	DAVMNTLGMSGDNK	E	Deamidated (NQ); 2 Oxidation (M)	0.00031000300000.0	File841 Spectrum331863 scans: 5642	1110.22	1285.55	952.928	1329.51	4702.81	4456.11	2600.05	3605.59	10.1166	10.3282	9.89622	10.3767	12.1993	12.1216	11.3443	11.816	10.1794	-0.0627943	0.148744	-0.283201
299	Pavir.Ca01780.1	Pavir.Ca01780.1	1970	28185	94	94	9	9	47.7	144038	1	1	1	520.629	1558.86	3	1558.87	-0.0024	0	30.3	21	30	0.047	K	TAETTEATK	Q			File828 Spectrum25301 scans: 3802	999.231	4031.18	1915.87	2522.56	12388.1	11813.3	3836.07	5615.79	9.96467	11.977	10.9038	11.3007	13.5967	13.5281	11.9054	12.4553	11.0365	-1.07186	0.940457	-0.132746
299	Pavir.Ca01780.1	Pavir.Ca01780.1	1970	28185	94	94	9	9	47.7	144039	1	1	1	520.629	1558.86	3	1558.87	-0.0016	0	30.52	19	29	0.04	K	TAETTEATK	Q			File828 Spectrum25266 scans: 3758	920.42	2723.52	1515.25	2276.19	4231.93	3994.64	2225.57	2553.96	9.84615	11.4113	10.5653	11.1524	12.0471	11.9638	11.12	11.3185	10.7438	-0.897638	0.66747	-0.178449
299	Pavir.Ca01780.1	Pavir.Ca01780.1	1970	28185	94	94	9	9	47.7	133057	1	1	1	765.434	1528.85	2	1528.86	-0.0027	0	44.33	23	30	0.0019	K	TAETTEAAK	Q			File846 Spectrum447973 scans: 3883	509.73	198.728	505.92	463.46	11962.3	8161.95	3698.86	6190.94	8.99359	7.63465	8.98277	8.8563	13.5462	12.9947	11.8529	12.5959	8.61683	0.376763	-0.982175	0.365939
299	Pavir.Ca01780.1	Pavir.Ca01780.1	1970	28185	94	94	9	9	47.7	133062	1	1	1	765.435	1528.85	2	1528.86	-0.0012	0	34.45	22	29	0.017	K	TAETTEAAK	Q			File846 Spectrum447936 scans: 3843	427.415	130.005	574.93	432.561	7196.13	5242.65	2370.27	3892.6	8.73949	7.02242	9.16724	8.75676	12.813	12.3561	11.2108	11.9265	8.42148	0.318013	-1.39906	0.745762
299	Pavir.Ca01780.1	Pavir.Ca01780.1	1970	28185	94	94	9	9	47.7	118868	1	1	1	495.95	1484.83	3	1484.83	-0.0028	0	32.98	24	29	0.022	K	AGETTEAAK	H			File846 Spectrum447754 scans: 3648	381.571	1309.18	472.558	847.817	2882.76	3716.56	1718.78	2118.96	8.57581	10.3544	8.88435	9.72761	11.4932	11.8598	10.7472	11.0491	9.38555	-0.809745	0.968893	-0.501205
299	Pavir.Ca01780.1	Pavir.Ca01780.1	1970	28185	94	94	9	9	47.7	118865	1	1	1	495.949	1484.83	3	1484.83	-0.0031	0	31.94	25	29	0.03	K	AGETTEAAK	H			File846 Spectrum447709 scans: 3598	320.22	1300.43	441.762	924.59	4475.18	7705.12	4198.74	4243.52	8.32292	10.3448	8.78713	9.85267	12.1277	12.9116	12.0357	12.051	9.32687	-1.00395	1.0179	-0.539744
299	Pavir.Ca01780.1	Pavir.Ca01780.1	1970	28185	94	94	9	9	47.7	118878	1	1	1	495.951	1484.83	3	1484.83	0.001	0	36.82	26	29	0.0094	K	AGETTEAAK	H			File846 Spectrum447558 scans: 3413	320.148	1621.08	391.242	508.777	3781.01	6369.94	3210.79	2764.73	8.3226	10.6627	8.61192	8.99089	11.8846	12.6371	11.6487	11.4329	9.14704	-0.82444	1.51571	-0.535119
299	Pavir.Ca01780.1	Pavir.Ca01780.1	1970	28185	94	94	9	9	47.7	118867	1	1	1	743.421	1484.83	2	1484.83	-0.0028	0	48.47		29	0.00062	K	AGETTEAAK	H			File846 Spectrum447574 scans: 3432	142.812	52.6178	21.3514	261.288	5036.29	10235.1	4587.07	4162.8	7.15797	5.71748	4.41626	8.0295	12.2981	13.3212	12.1634	12.0233	6.3303	0.827672	-0.612822	-1.91404
314	Pavir.Gb00328.1	Pavir.Gb00328.1	1879	37682	64	64	9	9	39.7	179098	1	1	1	830.979	1659.94	2	1659.95	-0.0031	0	71.79		30	3.4e-06	R	AGASALDVVEAVVR	E			File845 Spectrum443058 scans: 24281	671120	627302	738441	755773	19931	7077.23	95307.3	162565	19.3562	19.2588	19.4941	19.5276	14.2827	12.789	16.5403	17.3107	19.4092	-0.0529708	-0.15038	0.0849403
314	Pavir.Gb00328.1	Pavir.Gb00328.1	1879	37682	64	64	9	9	39.7	115240	1	1	1	737.895	1473.78	2	1473.78	-0.0014	0	38.99	25	28	0.0042	K	EAGSILFDYR	I			File841 Spectrum342847 scans: 17359	508961	444516	656739	538706	14163.6	48446	94345.1	115365	18.9572	18.7619	19.325	19.0391	13.7899	15.5641	16.5257	16.8159	19.0208	-0.0635973	-0.258917	0.304167
314	Pavir.Gb00328.1	Pavir.Gb00328.1	1879	37682	64	64	9	9	39.7	175424	1	1	1	550.638	1648.89	3	1648.9	-0.0021	0	37.11	16	29	0.0091	R	DVAAVMEYK	G	Oxidation (M)	0.000003000.0	File838 Spectrum268432 scans: 10184	167699	125123	159254	126651	23386.5	12958.3	23526.7	39105.4	17.3555	16.933	17.281	16.9505	14.5134	13.6616	14.522	15.2551	17.13	0.225522	-0.197006	0.150979
314	Pavir.Gb00328.1	Pavir.Gb00328.1	1879	37682	64	64	9	9	39.7	179112	1	1	1	830.98	1659.95	2	1659.95	-0.0002	0	57.1		29	9.3e-05	R	AGASALDVVEAVVR	E			File845 Spectrum443147 scans: 24376	162616	150443	186027	190447	8492.52	8569.07	20927.3	55653.4	17.3111	17.1989	17.5052	17.539	13.052	13.0649	14.3531	15.7642	17.3885	-0.0774253	-0.189682	0.116614
314	Pavir.Gb00328.1	Pavir.Gb00328.1	1879	37682	64	64	9	9	39.7	195943	1	1	1	858.921	1715.83	2	1715.83	-0.0035	0	53.83		25	8e-05	R	ELETDPFFNSGR	G	Deamidated (NQ)	0.000000001000.0	File834 Spectrum181660 scans: 17709	75370.7	65641.3	82736.9	75013.9	9722.69	8778.79	14276	22961	16.2017	16.0023	16.3362	16.1949	13.2471	13.0998	13.8013	14.4869	16.1838	0.0179294	-0.18147	0.152457
314	Pavir.Gb00328.1	Pavir.Gb00328.1	1879	37682	64	64	9	9	39.7	175423	1	1	1	825.454	1648.89	2	1648.9	-0.0026	0	36.89		29	0.0099	R	DVAAVMEYK	G	Oxidation (M)	0.000003000.0	File838 Spectrum268466 scans: 10220	67384	44759.1	75535.8	60061.8	6897.37	6187.12	14561.4	20180.5	16.0401	15.4499	16.2049	15.8742	12.7518	12.5951	13.8299	14.3007	15.8923	0.147858	-0.442369	0.312612
314	Pavir.Gb00328.1	Pavir.Gb00328.1	1879	37682	64	64	9	9	39.7	195953	1	1	1	858.923	1715.83	2	1715.83	-0.0004	0	46.27		26	0.00047	R	ELETDPFFNSGR	G	Deamidated (NQ)	0.000000001000.0	File834 Spectrum181733 scans: 17787	63587.6	52191.5	72158.8	71377.4	5145.07	7735.92	12048.8	17725.2	15.9565	15.6715	16.1389	16.1232	12.329	12.9174	13.5566	14.1135	15.9725	-0.0160561	-0.300985	0.166375
314	Pavir.Gb00328.1	Pavir.Gb00328.1	1879	37682	64	64	9	9	39.7	195672	1	1	1	858.431	1714.85	2	1714.85	0.0005	0	32.7		27	0.014	R	ELETDPFFNSGR	G			File836 Spectrum230938 scans: 17520	60234.3	58116.5	78934	73492.3	7607.76	2524.2	12825.2	21570.8	15.8783	15.8267	16.2684	16.1653	12.8933	11.3016	13.6467	14.3968	16.0347	-0.156358	-0.207996	0.233704
314	Pavir.Gb00328.1	Pavir.Gb00328.1	1879	37682	64	64	9	9	39.7	179105	1	1	1	830.979	1659.94	2	1659.95	-0.0019	0	67.87		30	8.3e-06	R	AGASALDVVEAVVR	E			File845 Spectrum442971 scans: 24188	59244.6	74097	71464.3	71733.5	5861.63	3437.19	10481.6	18072.8	15.8544	16.1771	16.1249	16.1304	12.5171	11.747	13.3556	14.1415	16.0717	-0.217308	0.105423	0.0532308
314	Pavir.Gb00328.1	Pavir.Gb00328.1	1879	37682	64	64	9	9	39.7	191263	1	1	1	850.418	1698.82	2	1698.82	-0.0017	0	60.27		26	2.3e-05	R	GTVEMEASIMDGR	G			File833 Spectrum155155 scans: 14985	55219.6	45062.9	75351	73507.4	8728.54	5971.19	13869.8	17131	15.7529	15.4597	16.2013	16.1656	13.0915	12.5438	13.7597	14.0643	15.8949	-0.141978	-0.43522	0.306467
314	Pavir.Gb00328.1	Pavir.Gb00328.1	1879	37682	64	64	9	9	39.7	175421	1	1	1	550.638	1648.89	3	1648.9	-0.0039	0	38.77	16	29	0.0065	R	DVAAVMEYK	G	Oxidation (M)	0.000003000.0	File833 Spectrum151224 scans: 10792	54234.9	40951.2	45974.2	45292	6461.46	7619.79	5640.59	15247.5	15.7269	15.3216	15.4885	15.467	12.6576	12.8955	12.4616	13.8963	15.501	0.22592	-0.179396	-0.0124782
314	Pavir.Gb00328.1	Pavir.Gb00328.1	1879	37682	64	64	9	9	39.7	195951	1	1	1	858.922	1715.83	2	1715.83	-0.0006	0	58.1		26	3.2e-05	R	ELETDPFFNSGR	G	Deamidated (NQ)	0.000000001000.0	File834 Spectrum181754 scans: 17809	53593.3	49793.9	60379.2	61930.3	6750.83	7435.27	12889	16985.3	15.7098	15.6037	15.8818	15.9184	12.7209	12.8602	13.6539	14.052	15.7784	-0.0686268	-0.17471	0.103372
314	Pavir.Gb00328.1	Pavir.Gb00328.1	1879	37682	64	64	9	9	39.7	115236	1	1	1	737.894	1473.77	2	1473.78	-0.003	0	45.6	25	28	0.00088	K	EAGSILFDYR	I			File841 Spectrum342763 scans: 17269	53259.1	49096.8	64367.6	57856.1	4274.77	8251.3	7581.97	13139.8	15.7007	15.5833	15.974	15.8202	12.0616	13.0104	12.8884	13.6817	15.7696	-0.0688365	-0.186235	0.204468
314	Pavir.Gb00328.1	Pavir.Gb00328.1	1879	37682	64	64	9	9	39.7	321764	1	1	1	755.406	2263.2	3	2263.2	-0.0054	0	63.82	17	31	2.7e-05	R	WAIAIHGGAGVDPNLPESR	Q			File828 Spectrum38043 scans: 17395	51719.3	49497.9	60483.7	58024.3	5371.46	3680.81	10765.2	18846.4	15.6584	15.5951	15.8843	15.8244	12.3911	11.8458	13.3941	14.202	15.7405	-0.082115	-0.145452	0.143728
314	Pavir.Gb00328.1	Pavir.Gb00328.1	1879	37682	64	64	9	9	39.7	290123	1	1	1	1045.07	2088.12	2	2088.12	-0.0021	0	47.83		30	0.001	K	GLPLQEAVDYCVK	E	Methylthio (C)	0.0000000000200.0	File845 Spectrum444060 scans: 25349	38046.7	25445.1	35414.3	26933.3	2019.65	1712.64	5993.07	8512.82	15.2155	14.6351	15.112	14.7171	10.9799	10.742	12.5491	13.0554	14.9199	0.29555	-0.284833	0.192112
314	Pavir.Gb00328.1	Pavir.Gb00328.1	1879	37682	64	64	9	9	39.7	290107	1	1	1	1045.06	2088.11	2	2088.12	-0.0109	0	45.44		30	0.0016	K	GLPLQEAVDYCVK	E	Methylthio (C)	0.0000000000200.0	File845 Spectrum444031 scans: 25318	36663.9	28063.7	35798.5	28550.5	2887.35	2512.32	6028.13	9052.09	15.1621	14.7764	15.1276	14.8012	11.4955	11.2948	12.5575	13.144	14.9668	0.195241	-0.190416	0.160778
314	Pavir.Gb00328.1	Pavir.Gb00328.1	1879	37682	64	64	9	9	39.7	290120	1	1	1	697.046	2088.12	3	2088.12	-0.0039	0	66.2	20	30	1.4e-05	K	GLPLQEAVDYCVK	E	Methylthio (C)	0.0000000000200.0	File845 Spectrum443897 scans: 25176	36078.4	32475.6	34560.8	26364.4	2384.1	3065.21	7272.65	11323.5	15.1388	14.9871	15.0769	14.6863	11.2192	11.5818	12.8283	13.467	14.9723	0.16658	0.0148014	0.104582
314	Pavir.Gb00328.1	Pavir.Gb00328.1	1879	37682	64	64	9	9	39.7	290113	1	1	1	1045.06	2088.11	2	2088.12	-0.0063	0	54.38	16	30	0.00022	K	GLPLQEAVDYCVK	E	Methylthio (C)	0.0000000000200.0	File845 Spectrum444038 scans: 25326	34879.7	19552.8	26558.9	22036.1	1226.81	1079.51	5245.14	6332.2	15.0901	14.2551	14.6969	14.4276	10.2607	10.0762	12.3568	12.6285	14.6174	0.472682	-0.362329	0.0794859
314	Pavir.Gb00328.1	Pavir.Gb00328.1	1879	37682	64	64	9	9	39.7	195942	1	1	1	858.921	1715.83	2	1715.83	-0.0037	0	46.21		25	0.00046	R	ELETDPFFNSGR	G	Deamidated (NQ)	0.000000001000.0	File834 Spectrum181781 scans: 17838	33428.3	26420	37645.2	33368.9	5198.93	4700.73	7002.01	9438.89	15.0288	14.6893	15.2002	15.0262	12.344	12.1987	12.7736	13.2044	14.9861	0.0426534	-0.296789	0.214048
314	Pavir.Gb00328.1	Pavir.Gb00328.1	1879	37682	64	64	9	9	39.7	195961	1	1	1	858.923	1715.83	2	1715.83	0.0015	0	30.08	21	26	0.021	R	ELETDPFFNSGR	G	Deamidated (NQ)	0.000000001000.0	File833 Spectrum157738 scans: 17740	31830.8	30097.2	37085.3	33081.8	9261.19	7871.19	14368.5	17557.1	14.9581	14.8773	15.1786	15.0138	13.177	12.9424	13.8106	14.0998	15.0069	-0.0488113	-0.129605	0.171612
314	Pavir.Gb00328.1	Pavir.Gb00328.1	1879	37682	64	64	9	9	39.7	290121	1	1	1	697.047	2088.12	3	2088.12	-0.0028	0	63.26	19	30	2.8e-05	K	GLPLQEAVDYCVK	E	Methylthio (C)	0.0000000000200.0	File845 Spectrum443869 scans: 25146	31223.8	26453.2	28084	19994.9	1960.51	2588.33	4746.32	9941.16	14.9304	14.6912	14.7775	14.2873	10.937	11.3378	12.2126	13.2792	14.6716	0.25878	0.0195756	0.105882
314	Pavir.Gb00328.1	Pavir.Gb00328.1	1879	37682	64	64	9	9	39.7	175418	1	1	1	550.637	1648.89	3	1648.9	-0.0067	0	34.17	15	29	0.019	R	DVAAVMEYK	G	Oxidation (M)	0.000003000.0	File832 Spectrum127470 scans: 10673	31109.7	25247.2	19692.6	21101.2	4756.98	2927.55	5209.6	6257.09	14.9251	14.6238	14.2654	14.365	12.2158	11.5155	12.347	12.6113	14.5448	0.380248	0.0790087	-0.279464
314	Pavir.Gb00328.1	Pavir.Gb00328.1	1879	37682	64	64	9	9	39.7	290119	1	1	1	1045.07	2088.12	2	2088.12	-0.0048	0	41.32	20	30	0.0044	K	GLPLQEAVDYCVK	E	Methylthio (C)	0.0000000000200.0	File845 Spectrum444072 scans: 25362	30157.1	20081.5	28284	22757.8	1168.48	743.826	4143.13	6636.03	14.8802	14.2936	14.7877	14.4741	10.1904	9.53882	12.0165	12.6961	14.6089	0.27132	-0.31531	0.178809
314	Pavir.Gb00328.1	Pavir.Gb00328.1	1879	37682	64	64	9	9	39.7	191260	1	1	1	850.417	1698.82	2	1698.82	-0.0035	0	64.05		26	9.3e-06	R	GTVEMEASIMDGR	G			File833 Spectrum155237 scans: 15072	28230.8	23126.2	37406.8	33237.5	4208	3835.27	6694.49	8796.47	14.785	14.4972	15.191	15.0205	12.0389	11.9051	12.7088	13.1027	14.8734	-0.0884596	-0.376198	0.317572
314	Pavir.Gb00328.1	Pavir.Gb00328.1	1879	37682	64	64	9	9	39.7	290125	1	1	1	1045.07	2088.12	2	2088.12	-0.0002	0	36.96		30	0.011	K	GLPLQEAVDYCVK	E	Methylthio (C)	0.0000000000200.0	File845 Spectrum444121 scans: 25414	28162.1	19266.7	24919	19945.2	2300.26	1479.8	4156.52	8157.42	14.7815	14.2338	14.605	14.2838	11.1676	10.5312	12.0212	12.9939	14.476	0.305465	-0.242178	0.128958
314	Pavir.Gb00328.1	Pavir.Gb00328.1	1879	37682	64	64	9	9	39.7	356506	1	1	1	837.104	2508.29	3	2508.29	-0.0037	0	62.42	17	30	3.3e-05	R	IPLAGTDTCSALAGADNHK	G	Methylthio (C)	0.0000000020000000000.0	File846 Spectrum461410 scans: 18216	27403.7	16171.1	29395.2	30628.3	4665.21	3189.44	7040.12	8178.72	14.7421	13.9811	14.8433	14.9026	12.1877	11.6391	12.7814	12.9977	14.6173	0.124811	-0.636144	0.226024
314	Pavir.Gb00328.1	Pavir.Gb00328.1	1879	37682	64	64	9	9	39.7	356501	1	1	1	837.102	2508.29	3	2508.29	-0.0072	0	64.93	17	30	1.9e-05	R	IPLAGTDTCSALAGADNHK	G	Methylthio (C)	0.0000000020000000000.0	File846 Spectrum461381 scans: 18185	26166.4	18500.1	34964.4	32914.4	5499.02	3358.99	6245.84	9936.67	14.6754	14.1752	15.0936	15.0064	12.425	11.7138	12.6087	13.2785	14.7377	-0.0622461	-0.562433	0.355924
314	Pavir.Gb00328.1	Pavir.Gb00328.1	1879	37682	64	64	9	9	39.7	421374	1	1	1	1042.86	3125.57	3	3125.57	-0.0004	0	63.68		31	3e-05	R	EQGLETVDNSYFITEDNVGMLK	L	Oxidation (M)	0.0000000000000000000300.0	File835 Spectrum209840 scans: 20396	20065	11472.3	21472	19106.6	1885.09	1176.89	3188.04	3800.67	14.2924	13.4859	14.3902	14.2218	10.8804	10.2008	11.6385	11.892	14.0976	0.194843	-0.611689	0.292619
314	Pavir.Gb00328.1	Pavir.Gb00328.1	1879	37682	64	64	9	9	39.7	195617	1	1	1	858.412	1714.81	2	1714.82	-0.0076	0	43.56		25	0.00073	R	GTVEMEASIMDGR	G	Oxidation (M)	0.0000000003000.0	File830 Spectrum80520 scans: 10580	19123.1	15263.4	20904.1	25638	7217.66	5133.58	6273.4	7194.36	14.223	13.8978	14.3515	14.646	12.8173	12.3257	12.615	12.8127	14.2796	-0.0565491	-0.38179	0.0719196
314	Pavir.Gb00328.1	Pavir.Gb00328.1	1879	37682	64	64	9	9	39.7	195960	1	1	1	858.923	1715.83	2	1715.83	0.0013	0	49.57		26	0.00023	R	ELETDPFFNSGR	G	Deamidated (NQ)	0.000000001000.0	File833 Spectrum157758 scans: 17761	18100.3	18056.8	19916.3	16779.6	3887.68	4649.59	9051.24	8252.72	14.1437	14.1403	14.2817	14.0344	11.9247	12.1829	13.1439	13.0107	14.15	-0.00629202	-0.00976278	0.131646
314	Pavir.Gb00328.1	Pavir.Gb00328.1	1879	37682	64	64	9	9	39.7	200292	1	1	1	866.414	1730.81	2	1730.81	0.0022	0	42.5		24	0.00085	R	GTVEMEASIMDGR	G	2 Oxidation (M)	0.0000300003000.0	File846 Spectrum450585 scans: 6669	13972.7	10994	11846.8	13479.1	343.928	946.603	2291.49	2107.74	13.7703	13.4244	13.5322	13.7184	8.42596	9.88662	11.1621	11.0415	13.6113	0.158971	-0.186922	-0.0791415
314	Pavir.Gb00328.1	Pavir.Gb00328.1	1879	37682	64	64	9	9	39.7	290116	1	1	1	1045.06	2088.12	2	2088.12	-0.0056	0	31.7	16	30	0.041	K	GLPLQEAVDYCVK	E	Methylthio (C)	0.0000000000200.0	File845 Spectrum444132 scans: 25426	12699.6	9782.63	12062.4	10653.7	880.108	733.488	2720.52	3530.47	13.6325	13.256	13.5582	13.3791	9.78154	9.51863	11.4097	11.7856	13.4564	0.176047	-0.20044	0.101779
314	Pavir.Gb00328.1	Pavir.Gb00328.1	1879	37682	64	64	9	9	39.7	195615	1	1	1	858.41	1714.8	2	1714.82	-0.0125	0	41.56		24	0.0011	R	GTVEMEASIMDGR	G	Oxidation (M)	0.0000000003000.0	File830 Spectrum80488 scans: 10546	11798.7	8850.19	11466.8	11329.3	2961.19	1589.09	2527.75	2818.55	13.5263	13.1115	13.4852	13.4678	11.532	10.634	11.3036	11.4607	13.3977	0.128648	-0.286204	0.0874851
314	Pavir.Gb00328.1	Pavir.Gb00328.1	1879	37682	64	64	9	9	39.7	200290	1	1	1	866.412	1730.81	2	1730.81	-0.0019	0	42.09		24	0.00089	R	GTVEMEASIMDGR	G	2 Oxidation (M)	0.0000300003000.0	File846 Spectrum450550 scans: 6632	11543.7	8343.63	7779.97	11087.4	302.604	255.837	1828.07	2035.99	13.4948	13.0265	12.9255	13.4366	8.24129	7.99908	10.8361	10.9915	13.2209	0.273957	-0.194405	-0.295316
314	Pavir.Gb00328.1	Pavir.Gb00328.1	1879	37682	64	64	9	9	39.7	195933	1	1	1	858.92	1715.83	2	1715.83	-0.0056	0	31.26	15	25	0.013	R	ELETDPFFNSGR	G	Deamidated (NQ)	0.000000001000.0	File833 Spectrum157777 scans: 17781	11238.9	10653.2	14401.9	12978.1	3804.74	4342.04	6398.51	7059.82	13.4562	13.379	13.814	13.6638	11.8936	12.0842	12.6435	12.7854	13.5782	-0.122032	-0.199244	0.235726
314	Pavir.Gb00328.1	Pavir.Gb00328.1	1879	37682	64	64	9	9	39.7	191256	1	1	1	850.415	1698.82	2	1698.82	-0.0061	0	44.96	18	26	0.00064	R	GTVEMEASIMDGR	G			File833 Spectrum155271 scans: 15108	9809.14	10291.2	14265.5	11497.5	2525.68	1629.74	3075.06	3984.53	13.2599	13.3291	13.8002	13.489	11.3025	10.6704	11.5864	11.9602	13.4696	-0.209667	-0.140455	0.330667
314	Pavir.Gb00328.1	Pavir.Gb00328.1	1879	37682	64	64	9	9	39.7	421377	1	1	1	1042.86	3125.57	3	3125.57	0.0007	0	73.74	20	31	2.9e-06	R	EQGLETVDNSYFITEDNVGMLK	L	Oxidation (M)	0.0000000000000000000300.0	File836 Spectrum234144 scans: 20940	9609.37	4298.44	8259.77	9798.13	1563.85	2039.86	2318.84	4236.79	13.2302	12.0696	13.0119	13.2583	10.6109	10.9943	11.1792	12.0488	12.8925	0.337726	-0.822903	0.119386
314	Pavir.Gb00328.1	Pavir.Gb00328.1	1879	37682	64	64	9	9	39.7	290124	1	1	1	697.047	2088.12	3	2088.12	-0.0008	0	40.98	20	30	0.0045	K	GLPLQEAVDYCVK	E	Methylthio (C)	0.0000000000200.0	File844 Spectrum419754 scans: 24709	9305.6	6907.81	6027.54	8377.98	2852.43	761.253	1889.95	2049.45	13.1839	12.754	12.5574	13.0324	11.478	9.57223	10.8841	11.001	12.8819	0.301974	-0.127897	-0.324555
314	Pavir.Gb00328.1	Pavir.Gb00328.1	1879	37682	64	64	9	9	39.7	421363	1	1	1	1042.86	3125.56	3	3125.57	-0.0129	0	64.49		31	2.3e-05	R	EQGLETVDNSYFITEDNVGMLK	L	Oxidation (M)	0.0000000000000000000300.0	File836 Spectrum234059 scans: 20849	9288.95	7408.32	10755.2	11123	1970.18	1642.58	3793.34	4671.79	13.1813	12.8549	13.3927	13.4413	10.9441	10.6817	11.8893	12.1898	13.2176	-0.0362589	-0.362629	0.175186
314	Pavir.Gb00328.1	Pavir.Gb00328.1	1879	37682	64	64	9	9	39.7	420350	1	1	1	1037.53	3109.56	3	3109.57	-0.0181	0	48.9	17	31	0.00087	R	EQGLETVDNSYFITEDNVGMLK	L			File835 Spectrum210467 scans: 21065	8934.75	7563.6	9996.2	8711.63	1965.75	2553	2183.35	3270.37	13.1252	12.8849	13.2872	13.0887	10.9409	11.318	11.0923	11.6752	13.0965	0.0287219	-0.211632	0.190674
314	Pavir.Gb00328.1	Pavir.Gb00328.1	1879	37682	64	64	9	9	39.7	421373	1	1	1	1042.86	3125.57	3	3125.57	-0.0008	0	50.01	24	31	0.00069	R	EQGLETVDNSYFITEDNVGMLK	L	Oxidation (M)	0.0000000000000000000300.0	File835 Spectrum209782 scans: 20334	8275.9	8078.1	9020.59	10733	1838.25	1929.68	3598.29	2899.27	13.0147	12.9798	13.139	13.3898	10.8441	10.9141	11.8131	11.5015	13.1308	-0.116119	-0.151018	0.00818757
314	Pavir.Gb00328.1	Pavir.Gb00328.1	1879	37682	64	64	9	9	39.7	191262	1	1	1	567.281	1698.82	3	1698.82	-0.0017	0	40.44	15	26	0.0022	R	GTVEMEASIMDGR	G			File833 Spectrum155216 scans: 15050	7976.34	5467.72	3651.52	4248.44	1588.36	1545.3	2424.74	2335.34	12.9615	12.4167	11.8343	12.0527	10.6333	10.5937	11.2436	11.1894	12.3163	0.645202	0.100416	-0.482028
314	Pavir.Gb00328.1	Pavir.Gb00328.1	1879	37682	64	64	9	9	39.7	421369	1	1	1	1042.86	3125.56	3	3125.57	-0.0048	0	71.23		31	5e-06	R	EQGLETVDNSYFITEDNVGMLK	L	Oxidation (M)	0.0000000000000000000300.0	File838 Spectrum278627 scans: 21058	7325.37	5155.34	9147.55	7626.64	1045.31	953.827	1777.42	2857.79	12.8387	12.3319	13.1592	12.8968	10.0297	9.89758	10.7956	11.4807	12.8066	0.0320504	-0.474782	0.352535
314	Pavir.Gb00328.1	Pavir.Gb00328.1	1879	37682	64	64	9	9	39.7	420356	1	1	1	1037.53	3109.57	3	3109.57	-0.0023	0	86.1	19	31	1.7e-07	R	EQGLETVDNSYFITEDNVGMLK	L			File836 Spectrum235808 scans: 22720	6565.01	7153.89	10738.3	8931.78	905.341	65.7286	1905.8	2177.26	12.6806	12.8045	13.3905	13.1247	9.82232	6.03845	10.8962	11.0883	13.0001	-0.319493	-0.195563	0.390398
314	Pavir.Gb00328.1	Pavir.Gb00328.1	1879	37682	64	64	9	9	39.7	195620	1	1	1	572.612	1714.81	3	1714.82	-0.0038	0	44.66		25	0.00061	R	GTVEMEASIMDGR	G	Oxidation (M)	0.0000000003000.0	File830 Spectrum80497 scans: 10556	5217.81	5030.46	7322.08	6730.32	5608.87	7042.9	5675.26	3829.82	12.3492	12.2965	12.838	12.7165	12.4535	12.782	12.4705	11.9031	12.5501	-0.200822	-0.253575	0.287988
314	Pavir.Gb00328.1	Pavir.Gb00328.1	1879	37682	64	64	9	9	39.7	115234	1	1	1	492.265	1473.77	3	1473.78	-0.0039	0	40.78	18	27	0.0026	K	EAGSILFDYR	I			File841 Spectrum342778 scans: 17285	4944.51	5196.35	6712.05	5544.6	1235.6	1325.45	2525.18	3238.98	12.2716	12.3433	12.7125	12.4369	10.271	10.3723	11.3022	11.6613	12.4411	-0.169463	-0.0977916	0.271462
314	Pavir.Gb00328.1	Pavir.Gb00328.1	1879	37682	64	64	9	9	39.7	420353	1	1	1	1037.53	3109.57	3	3109.57	-0.0067	0	63.82	17	31	2.8e-05	R	EQGLETVDNSYFITEDNVGMLK	L			File836 Spectrum235918 scans: 22837	3426.74	3103.36	4115.56	3751.07	449.866	604.937	1089.27	1474.3	11.7426	11.5996	12.0069	11.8731	8.81335	9.24064	10.0891	10.5258	11.8055	-0.0629264	-0.205934	0.201323
314	Pavir.Gb00328.1	Pavir.Gb00328.1	1879	37682	64	64	9	9	39.7	191259	1	1	1	567.28	1698.82	3	1698.82	-0.0035	0	41.24		26	0.0018	R	GTVEMEASIMDGR	G			File833 Spectrum155145 scans: 14974	3300.96	4589.83	3410.4	3360.39	2150.25	1522.87	1817.4	2976.63	11.6887	12.1642	11.7357	11.7144	11.0703	10.5726	10.8277	11.5395	11.8258	-0.137089	0.338469	-0.0900336
314	Pavir.Gb00328.1	Pavir.Gb00328.1	1879	37682	64	64	9	9	39.7	195621	1	1	1	572.612	1714.81	3	1714.82	-0.0034	0	48.7		25	0.00024	R	GTVEMEASIMDGR	G	Oxidation (M)	0.0000000003000.0	File830 Spectrum80480 scans: 10538	3223.49	4807.55	5406.69	6530.98	3356.24	2249.67	2217.96	2472.12	11.6544	12.2311	12.4005	12.6731	11.7126	11.1355	11.115	11.2715	12.2398	-0.585367	-0.00869244	0.160752
326	Pavir.J16366.1	Pavir.J16366.1	1844	56577	61	61	11	11	38.3	126118	1	1	1	754.896	1507.78	2	1507.78	-0.0009	0	51.12		27	0.00024	R	GDTVDELSNVR	D			File829 Spectrum56484 scans: 10964	44371	52150.9	59673.1	41116.4	220097	169351	77247.9	42625.8	15.4373	15.6704	15.8648	15.3274	17.7478	17.3697	16.2372	15.3794	15.575	-0.137659	0.0954157	0.289806
326	Pavir.J16366.1	Pavir.J16366.1	1844	56577	61	61	11	11	38.3	126130	1	1	1	754.897	1507.78	2	1507.78	0.0014	0	43.07	17	28	0.0016	R	GDTVDELSNVR	D			File830 Spectrum80500 scans: 10559	15144.2	14958.7	19265.1	14510.8	63446.3	49110.4	21879.1	13352.8	13.8865	13.8687	14.2337	13.8248	15.9532	15.5837	14.4173	13.7049	13.9534	-0.0669509	-0.0847332	0.280276
326	Pavir.J16366.1	Pavir.J16366.1	1844	56577	61	61	11	11	38.3	126108	1	1	1	754.895	1507.78	2	1507.78	-0.0029	0	53.69		28	0.00014	R	GDTVDELSNVR	D			File829 Spectrum56420 scans: 10895	10783.5	12227.9	12141.2	11772	42950	31636.5	13355.3	11502.9	13.3965	13.5779	13.5676	13.5231	15.3904	14.9493	13.7051	13.4897	13.5163	-0.119745	0.0616132	0.0513378
336	Pavir.Ib03633.1	Pavir.Ib03633.1	1767	54044	71	71	12	12	35.6	185169	1	1	1	560.639	1678.9	3	1678.9	-0.0033	0	46.32	18	29	0.0011	K	SAASGTTEYGK	Q			File831 Spectrum98320 scans: 4567	6341.93	12647	5180.59	6893.14	39843.5	48394.6	27446.8	16895.6	12.6307	13.6265	12.3389	12.7509	15.2821	15.5626	14.7443	14.0444	12.8368	-0.206057	0.789741	-0.497864
336	Pavir.Ib03633.1	Pavir.Ib03633.1	1767	54044	71	71	12	12	35.6	245101	1	1	1	948.028	1894.04	2	1894.05	-0.0052	0	34.01	15	29	0.019	R	LGDLGAPLVEDPAAPR	S			File840 Spectrum321630 scans: 19651	5509.81	7110.57	5485.04	6583.68	36210.2	71860.1	36968.2	21391.4	12.4278	12.7957	12.4213	12.6847	15.1441	16.1329	15.174	14.3847	12.5824	-0.154588	0.213374	-0.161089
336	Pavir.Ib03633.1	Pavir.Ib03633.1	1767	54044	71	71	12	12	35.6	245105	1	1	1	948.03	1894.05	2	1894.05	-0.0013	0	55.26	16	29	0.00014	R	LGDLGAPLVEDPAAPR	S			File840 Spectrum321688 scans: 19713	5018.3	11193.7	7553.72	6476.48	35391	65348.6	30179.9	19171.5	12.293	13.4504	12.883	12.661	15.1111	15.9959	14.8813	14.2267	12.8218	-0.528854	0.628563	0.0611335
336	Pavir.Ib03633.1	Pavir.Ib03633.1	1767	54044	71	71	12	12	35.6	245104	1	1	1	948.03	1894.05	2	1894.05	-0.0014	0	81.88	18	29	3.1e-07	R	LGDLGAPLVEDPAAPR	S			File840 Spectrum321671 scans: 19695	4906.03	10164.1	5550.27	9188.15	37696.1	70610.9	37947.5	22400.4	12.2603	13.3112	12.4383	13.1656	15.2021	16.1076	15.2117	14.4512	12.7939	-0.533521	0.517341	-0.355519
336	Pavir.Ib03633.1	Pavir.Ib03633.1	1767	54044	71	71	12	12	35.6	185170	1	1	1	560.639	1678.9	3	1678.9	-0.0029	0	43.24		29	0.0022	K	SAASGTTEYGK	Q			File830 Spectrum75124 scans: 4825	4207.68	8773.74	4022.34	5679.09	11990	16554.7	9169.3	6430.86	12.0388	13.099	11.9738	12.4714	13.5495	14.015	13.1626	12.6508	12.3958	-0.356953	0.703214	-0.421944
336	Pavir.Ib03633.1	Pavir.Ib03633.1	1767	54044	71	71	12	12	35.6	245109	1	1	1	948.031	1894.05	2	1894.05	0.0005	0	64.55		29	1.6e-05	R	LGDLGAPLVEDPAAPR	S			File840 Spectrum321607 scans: 19626	3838.81	6344.11	4414.55	4252.91	27437.4	50704.6	28241	16447.1	11.9064	12.6312	12.1081	12.0542	14.7439	15.6298	14.7855	14.0055	12.175	-0.268539	0.45622	-0.0669326
336	Pavir.Ib03633.1	Pavir.Ib03633.1	1767	54044	71	71	12	12	35.6	185172	1	1	1	560.639	1678.9	3	1678.9	-0.0024	0	34.46	19	29	0.017	K	SAASGTTEYGK	Q			File830 Spectrum75055 scans: 4751	3740.61	5915.45	4027.06	4584.98	12549.4	16504.1	10198.4	6702.18	11.8691	12.5303	11.9755	12.1627	13.6153	14.0105	13.3161	12.7104	12.1344	-0.265328	0.395888	-0.158875
336	Pavir.Ib03633.1	Pavir.Ib03633.1	1767	54044	71	71	12	12	35.6	245106	1	1	1	948.03	1894.05	2	1894.05	-0.001	0	73.48	18	29	2e-06	R	LGDLGAPLVEDPAAPR	S			File840 Spectrum321710 scans: 19736	3660.84	7278.32	4704.67	4763.1	22714.8	42382.9	22563.3	12769.8	11.838	12.8294	12.1999	12.2177	14.4713	15.3712	14.4617	13.6404	12.2712	-0.43327	0.558162	-0.0713502
336	Pavir.Ib03633.1	Pavir.Ib03633.1	1767	54044	71	71	12	12	35.6	253491	1	1	1	642.992	1925.95	3	1925.96	-0.007	0	46.66		28	0.00071	R	NAGEGEAAAGGQGQLHR	E			File827 Spectrum600 scans: 3772	1979.6	3195.64	2801.4	1835.78	3376.01	3056.65	2913.18	2742.31	10.951	11.6419	11.4519	10.8422	11.7211	11.5777	11.5084	11.4212	11.2217	-0.270758	0.420141	0.230184
336	Pavir.Ib03633.1	Pavir.Ib03633.1	1767	54044	71	71	12	12	35.6	370600	1	1	1	874.431	2620.27	3	2620.27	-0.0016	0	70.13		29	4.2e-06	R	GDAPAATEATNGSTGGAGYTDK	I	Deamidated (NQ)	0.0000000000100000000000.0	File846 Spectrum450413 scans: 6486	974.731	1094.33	609.183	533.543	5303.06	3496.8	3525.46	1979.93	9.92886	10.0958	9.25073	9.05946	12.3726	11.7718	11.7836	10.9512	9.58372	0.345139	0.512111	-0.33299
336	Pavir.Ib03633.1	Pavir.Ib03633.1	1767	54044	71	71	12	12	35.6	370598	1	1	1	874.43	2620.27	3	2620.27	-0.0023	0	89.28	20	29	5.1e-08	R	GDAPAATEATNGSTGGAGYTDK	I	Deamidated (NQ)	0.0000000000100000000000.0	File827 Spectrum3137 scans: 6480	959.51	4384.43	2597.2	3124.5	19608.7	18279.4	14426.7	7213.42	9.90615	12.0982	11.3427	11.6094	14.2592	14.1579	13.8165	12.8165	11.2391	-1.33297	0.859054	0.103622
336	Pavir.Ib03633.1	Pavir.Ib03633.1	1767	54044	71	71	12	12	35.6	370597	1	1	1	874.43	2620.27	3	2620.27	-0.0025	0	61.19		29	3.3e-05	R	GDAPAATEATNGSTGGAGYTDK	I	Deamidated (NQ)	0.0000000000100000000000.0	File827 Spectrum3141 scans: 6485	654.734	2908.5	1332.19	2879.04	16982.1	15727.9	12561	6921.92	9.35477	11.5061	10.3796	11.4914	14.0517	13.941	13.6167	12.757	10.6829	-1.32818	0.823116	-0.303363
378	Pavir.Cb01454.1	Pavir.Cb01454.1	1627	44677	49	49	9	9	27.9	157705	1	1	1	799.447	1596.88	2	1596.88	-0.0015	0	34.21	16	29	0.017	R	FVDLEASPLFR	W			File829 Spectrum70123 scans: 25512	108032	124987	62926.5	81687	38213.9	43462.7	36438	50630.7	16.7211	16.9314	15.9414	16.3178	15.2218	15.4075	15.1532	15.6277	16.4779	0.243171	0.453492	-0.536551
378	Pavir.Cb01454.1	Pavir.Cb01454.1	1627	44677	49	49	9	9	27.9	319218	1	1	1	749.779	2246.31	3	2246.32	-0.0071	1	101.26	20	27	2.3e-09	R	KLESLPADLAAAVAGGR	V			File830 Spectrum92543 scans: 23405	20827.2	19010.9	14756.4	17273.6	15171	14224.5	9782.11	8833.47	14.3462	14.2145	13.8491	14.0763	13.889	13.7961	13.2559	13.1088	14.1215	0.224666	0.0930287	-0.272461
378	Pavir.Cb01454.1	Pavir.Cb01454.1	1627	44677	49	49	9	9	27.9	319213	1	1	1	749.777	2246.31	3	2246.32	-0.0116	1	93.41	19	28	1.5e-08	R	KLESLPADLAAAVAGGR	V			File830 Spectrum92647 scans: 23516	17958	13841.3	11857.5	13290.6	11608.8	9448.09	9004.87	6215.61	14.1323	13.7567	13.5335	13.6981	13.5029	13.2058	13.1365	12.6017	13.7802	0.352171	-0.0234717	-0.246653
378	Pavir.Cb01454.1	Pavir.Cb01454.1	1627	44677	49	49	9	9	27.9	319221	1	1	1	749.779	2246.32	3	2246.32	-0.0043	1	81.62		27	2.1e-07	R	KLESLPADLAAAVAGGR	V			File830 Spectrum92630 scans: 23498	16553.9	15718.3	12518.9	13065.7	11676.8	9782.22	8071.88	7211.18	14.0149	13.9402	13.6118	13.6735	13.5114	13.2559	12.9787	12.816	13.8101	0.204795	0.130068	-0.198268
378	Pavir.Cb01454.1	Pavir.Cb01454.1	1627	44677	49	49	9	9	27.9	319222	1	1	1	749.78	2246.32	3	2246.32	-0.0036	1	106.37		27	7e-10	R	KLESLPADLAAAVAGGR	V			File830 Spectrum92682 scans: 23553	6585.11	6203.28	5888.56	5232.58	5238.23	4068.88	2938.43	3363.42	12.685	12.5988	12.5237	12.3533	12.3549	11.9904	11.5208	11.7157	12.5402	0.144789	0.0586133	-0.016505
378	Pavir.Cb01454.1	Pavir.Cb01454.1	1627	44677	49	49	9	9	27.9	157698	1	1	1	533.3	1596.88	3	1596.88	-0.0037	0	43.25	23	29	0.0022	R	FVDLEASPLFR	W			File829 Spectrum70100 scans: 25487	4661.87	5736.03	2830.33	3827.12	1939.61	1871.69	1231.61	2728.86	12.1867	12.4858	11.4668	11.902	10.9215	10.8701	10.2663	11.4141	12.0103	0.176362	0.475504	-0.543577
378	Pavir.Cb01454.1	Pavir.Cb01454.1	1627	44677	49	49	9	9	27.9	157703	1	1	1	533.301	1596.88	3	1596.88	-0.0019	0	38.53	24	29	0.0067	R	FVDLEASPLFR	W			File829 Spectrum70264 scans: 25662	2024.79	1968.45	1092.07	1228.5	499.596	1250.92	999.33	1574.08	10.9836	10.9428	10.0928	10.2627	8.96462	10.2888	9.96482	10.6203	10.5705	0.413075	0.37236	-0.477635
413	Pavir.Ea00612.1	Pavir.Ea00612.1	1480	22244	64	64	8	8	58.3	90087	1	1	1	696.866	1391.72	2	1391.72	-0.0024	0	42.71	19	27	0.0014	R	GDGELEAELR	A			File845 Spectrum429662 scans: 9992	600976	980547	826477	863027	1.52067e+06	2.66562e+06	3.25988e+06	2.3813e+06	19.1969	19.9032	19.6566	19.719	20.5363	21.346	21.6364	21.1833	19.619	-0.422011	0.284268	0.037656
413	Pavir.Ea00612.1	Pavir.Ea00612.1	1480	22244	64	64	8	8	58.3	102529	1	1	1	717.415	1432.82	2	1432.82	-0.0033	0	46.65	23	29	0.00086	R	ISPSELAAVSR	A			File841 Spectrum339217 scans: 13487	487708	677504	621358	677786	982313	1.89203e+06	2.19198e+06	1.74562e+06	18.8957	19.3699	19.2451	19.3705	19.9058	20.8515	21.0638	20.7353	19.2203	-0.324609	0.149604	0.0248005
413	Pavir.Ea00612.1	Pavir.Ea00612.1	1480	22244	64	64	8	8	58.3	90086	1	1	1	696.866	1391.72	2	1391.72	-0.0026	0	39.02	18	27	0.0034	R	GDGELEAELR	A			File845 Spectrum429753 scans: 10089	204623	310424	272161	280107	569638	825231	1.09676e+06	810361	17.6426	18.2439	18.0541	18.0956	19.1197	19.6544	20.0648	19.6282	18.0091	-0.366442	0.234826	0.0450496
413	Pavir.Ea00612.1	Pavir.Ea00612.1	1480	22244	64	64	8	8	58.3	192311	1	1	1	852.411	1702.81	2	1702.81	-0.0037	0	61.85		24	1e-05	R	AAFDVYDVDGDGR	I			File833 Spectrum155049 scans: 14872	166239	221388	256916	254358	515425	767478	952010	720333	17.3429	17.7562	17.9709	17.9565	18.9754	19.5498	19.8606	19.4583	17.7566	-0.413741	-0.000419499	0.214299
413	Pavir.Ea00612.1	Pavir.Ea00612.1	1480	22244	64	64	8	8	58.3	192310	1	1	1	852.411	1702.81	2	1702.81	-0.0038	0	76.47		24	3.5e-07	R	AAFDVYDVDGDGR	I			File833 Spectrum154959 scans: 14776	149383	223495	232623	224769	567050	836468	871693	687932	17.1887	17.7699	17.8276	17.7781	19.1131	19.674	19.7335	19.3919	17.6411	-0.452408	0.12882	0.18657
413	Pavir.Ea00612.1	Pavir.Ea00612.1	1480	22244	64	64	8	8	58.3	102528	1	1	1	717.415	1432.82	2	1432.82	-0.0034	0	38.45	24	29	0.0059	R	ISPSELAAVSR	A			File841 Spectrum339308 scans: 13584	126670	137047	177040	151320	273095	449959	568952	470094	16.9507	17.0643	17.4337	17.2072	18.059	18.7794	19.1179	18.8426	17.164	-0.213281	-0.0996832	0.269721
413	Pavir.Ea00612.1	Pavir.Ea00612.1	1480	22244	64	64	8	8	58.3	90085	1	1	1	696.866	1391.72	2	1391.72	-0.003	0	46.21	24	26	0.00055	R	GDGELEAELR	A			File846 Spectrum453993 scans: 10305	110245	255950	243265	199615	420428	608468	800470	565840	16.7504	17.9655	17.8922	17.6069	18.6815	19.2148	19.6105	19.11	17.5537	-0.803366	0.411781	0.338448
413	Pavir.Ea00612.1	Pavir.Ea00612.1	1480	22244	64	64	8	8	58.3	95689	1	1	1	705.939	1409.86	2	1409.87	-0.0066	0	39.04		28	0.0042	R	ITAAELGK	V			File839 Spectrum291032 scans: 10911	77973.1	69673.7	97784.7	88413.2	209297	335803	428641	279052	16.2507	16.0883	16.5773	16.432	17.6752	18.3573	18.7094	18.0902	16.3371	-0.0863884	-0.248751	0.240243
413	Pavir.Ea00612.1	Pavir.Ea00612.1	1480	22244	64	64	8	8	58.3	90082	1	1	1	696.865	1391.72	2	1391.72	-0.0035	0	34.23	20	26	0.0087	R	GDGELEAELR	A			File846 Spectrum454068 scans: 10385	73199.4	98001.3	72663	83688.8	163410	289429	379259	280509	16.1595	16.5805	16.1489	16.3527	17.3181	18.1429	18.5328	18.0977	16.3104	-0.150889	0.270079	-0.161502
413	Pavir.Ea00612.1	Pavir.Ea00612.1	1480	22244	64	64	8	8	58.3	95706	1	1	1	705.94	1409.87	2	1409.87	-0.0049	0	32.92	25	28	0.017	R	ITAAELGK	V			File839 Spectrum291078 scans: 10960	37962.4	38127.3	46143.1	42221.1	96944.1	148421	200547	136891	15.2123	15.2185	15.4938	15.3657	16.5649	17.1793	17.6136	17.0627	15.3226	-0.110296	-0.104045	0.171245
413	Pavir.Ea00612.1	Pavir.Ea00612.1	1480	22244	64	64	8	8	58.3	95703	1	1	1	705.94	1409.87	2	1409.87	-0.0051	0	39.81		28	0.0035	R	ITAAELGK	V			File839 Spectrum290964 scans: 10838	36589.1	50016.7	50348.1	45651.9	106865	161994	197050	133079	15.1591	15.6101	15.6196	15.4784	16.7054	17.3056	17.5882	17.0219	15.4668	-0.307696	0.143301	0.152828
413	Pavir.Ea00612.1	Pavir.Ea00612.1	1480	22244	64	64	8	8	58.3	95694	1	1	1	470.962	1409.86	3	1409.87	-0.0056	0	30.13	25	28	0.033	R	ITAAELGK	V			File839 Spectrum291075 scans: 10957	31662.4	16138.4	48630.5	20928.6	61779.5	131386	150471	116599	14.9505	13.9782	15.5696	14.3532	15.9148	17.0035	17.1991	16.8312	14.7129	0.237621	-0.734652	0.856709
413	Pavir.Ea00612.1	Pavir.Ea00612.1	1480	22244	64	64	8	8	58.3	95704	1	1	1	705.94	1409.87	2	1409.87	-0.005	0	38.82		28	0.0044	R	ITAAELGK	V			File839 Spectrum291094 scans: 10977	28774.5	30804.3	41337.9	41947.1	75196.2	102854	145287	95050.3	14.8125	14.9108	15.3352	15.3563	16.1984	16.6502	17.1485	16.5364	15.1037	-0.2912	-0.192859	0.231477
413	Pavir.Ea00612.1	Pavir.Ea00612.1	1480	22244	64	64	8	8	58.3	102533	1	1	1	717.415	1432.82	2	1432.82	-0.0028	0	34.59	23	29	0.016	R	ISPSELAAVSR	A			File841 Spectrum339131 scans: 13395	27881	50700.7	53418.4	61584.5	59468.4	100191	108795	87605.9	14.767	15.6297	15.705	15.9103	15.8598	16.6124	16.7313	16.4187	15.503	-0.736015	0.126708	0.202039
413	Pavir.Ea00612.1	Pavir.Ea00612.1	1480	22244	64	64	8	8	58.3	90090	1	1	1	696.866	1391.72	2	1391.72	-0.0021	0	31.34	23	27	0.019	R	GDGELEAELR	A			File846 Spectrum454098 scans: 10417	21545.7	30343.7	26743.9	25848	50012.3	84373	100924	76349.7	14.3951	14.8891	14.7069	14.6578	15.61	16.3645	16.6229	16.2203	14.6622	-0.267114	0.226882	0.0446966
413	Pavir.Ea00612.1	Pavir.Ea00612.1	1480	22244	64	64	8	8	58.3	102522	1	1	1	717.415	1432.82	2	1432.82	-0.0039	0	43.69	24	29	0.0018	R	ISPSELAAVSR	A			File842 Spectrum361862 scans: 13110	20122.3	39734.5	29846	30275	52085.7	71511.8	96702.4	74746.5	14.2965	15.2781	14.8652	14.8858	15.6686	16.1259	16.5613	16.1897	14.8314	-0.534918	0.44668	0.0338245
413	Pavir.Ea00612.1	Pavir.Ea00612.1	1480	22244	64	64	8	8	58.3	95693	1	1	1	705.94	1409.86	2	1409.87	-0.0056	0	34.24		28	0.013	R	ITAAELGK	V			File839 Spectrum291111 scans: 10995	19047.7	20118.9	23119.2	25235.9	48105.1	71130.1	91021.8	68109.3	14.2173	14.2963	14.4968	14.6232	15.5539	16.1182	16.4739	16.0556	14.4084	-0.191068	-0.112132	0.0884075
413	Pavir.Ea00612.1	Pavir.Ea00612.1	1480	22244	64	64	8	8	58.3	102523	1	1	1	717.415	1432.82	2	1432.82	-0.0039	0	45.14	27	29	0.0013	R	ISPSELAAVSR	A			File842 Spectrum361769 scans: 13011	16050.4	29792.8	28805.7	27371	39759.9	60896.8	78104	58052.7	13.9703	14.8627	14.8141	14.7404	15.279	15.8941	16.2531	15.8251	14.5969	-0.626532	0.265818	0.217209
413	Pavir.Ea00612.1	Pavir.Ea00612.1	1480	22244	64	64	8	8	58.3	192298	1	1	1	852.408	1702.8	2	1702.81	-0.0086	0	68.47		24	2.2e-06	R	AAFDVYDVDGDGR	I			File832 Spectrum131043 scans: 14484	13864.9	18363.9	19336.8	19580.3	35558.7	56973.2	75480.5	53926.9	13.7592	14.1646	14.2391	14.2571	15.1179	15.798	16.2038	15.7187	14.105	-0.345827	0.0596095	0.134083
413	Pavir.Ea00612.1	Pavir.Ea00612.1	1480	22244	64	64	8	8	58.3	192309	1	1	1	852.41	1702.81	2	1702.81	-0.0043	0	63.97		24	6.3e-06	R	AAFDVYDVDGDGR	I			File833 Spectrum155141 scans: 14970	13092.5	18497.1	21712.1	20469.9	37369.1	53583.8	68635.1	53747.5	13.6765	14.175	14.4062	14.3212	15.1896	15.7095	16.0667	15.7139	14.1447	-0.468271	0.0302889	0.261487
413	Pavir.Ea00612.1	Pavir.Ea00612.1	1480	22244	64	64	8	8	58.3	90081	1	1	1	464.913	1391.72	3	1391.72	-0.0036	0	29.96		26	0.023	R	GDGELEAELR	A			File845 Spectrum429722 scans: 10056	12122.4	109694	43956.7	15762.5	36603.1	42970.8	45408.5	35506.5	13.5654	16.7431	15.4238	13.9442	15.1597	15.3911	15.4707	15.1158	14.9191	-1.35375	1.824	0.504669
413	Pavir.Ea00612.1	Pavir.Ea00612.1	1480	22244	64	64	8	8	58.3	192307	1	1	1	852.41	1702.81	2	1702.81	-0.0048	0	64.76		25	5.4e-06	R	AAFDVYDVDGDGR	I			File833 Spectrum154873 scans: 14684	10476.8	16378	14156.3	12143.7	23596	37223.1	45656.3	33387.6	13.3549	13.9995	13.7892	13.5679	14.5263	15.1839	15.4785	15.027	13.6779	-0.322959	0.321607	0.111295
413	Pavir.Ea00612.1	Pavir.Ea00612.1	1480	22244	64	64	8	8	58.3	386866	1	1	1	926.801	2777.38	3	2777.39	-0.0125	0	34.39	16	30	0.021	K	MMAPQPQGSAADAAAPGGGLPDK	A	2 Oxidation (M)	0.33000000000000000000000.0	File832 Spectrum126164 scans: 9280	9486.45	35650.5	9320.02	12685.5	16598.6	28299.7	38800.1	31761.9	13.2117	15.1216	13.1861	13.6309	14.0188	14.7885	15.2438	14.955	13.7876	-0.575923	1.33406	-0.601457
413	Pavir.Ea00612.1	Pavir.Ea00612.1	1480	22244	64	64	8	8	58.3	386878	1	1	1	926.803	2777.39	3	2777.39	-0.0059	0	31.24	16	30	0.046	K	MMAPQPQGSAADAAAPGGGLPDK	A	2 Oxidation (M)	0.33000000000000000000000.0	File833 Spectrum149865 scans: 9342	9279.65	28465.2	9112.23	13704.9	9448.72	18998.6	22134.8	19732.1	13.1799	14.7969	13.1536	13.7424	13.2059	14.2136	14.434	14.2683	13.7182	-0.538335	1.07872	-0.564601
413	Pavir.Ea00612.1	Pavir.Ea00612.1	1480	22244	64	64	8	8	58.3	373523	1	1	1	882.747	2645.22	3	2645.23	-0.0066	0	44.48	16	26	0.00076	R	MIASVDGDGDGCVGFEEFK	K	Methylthio (C); Oxidation (M)	0.3000000000020000000.0	File836 Spectrum234268 scans: 21072	9226.02	12801.6	12938	13583.4	12496.5	15323.3	27584.1	25438.7	13.1715	13.644	13.6593	13.7296	13.6092	13.9034	14.7515	14.6347	13.5511	-0.379611	0.0929343	0.108224
413	Pavir.Ea00612.1	Pavir.Ea00612.1	1480	22244	64	64	8	8	58.3	386867	1	1	1	926.801	2777.38	3	2777.39	-0.0114	0	37.3		30	0.011	K	MMAPQPQGSAADAAAPGGGLPDK	A	2 Oxidation (M)	0.33000000000000000000000.0	File832 Spectrum126139 scans: 9253	9006.41	21406.4	9326.12	11010.9	12787.4	21285.7	36166.4	27580.1	13.1367	14.3858	13.1871	13.4266	13.6424	14.3776	15.1424	14.7513	13.534	-0.397311	0.851704	-0.346986
413	Pavir.Ea00612.1	Pavir.Ea00612.1	1480	22244	64	64	8	8	58.3	192299	1	1	1	852.408	1702.8	2	1702.81	-0.0083	0	30.75	22	25	0.013	R	AAFDVYDVDGDGR	I			File832 Spectrum131030 scans: 14470	8582.74	14426.5	16078	12098.2	28597.5	40612.8	50465.2	36885.5	13.0672	13.8164	13.9728	13.5625	14.8036	15.3096	15.623	15.1708	13.6047	-0.53752	0.21169	0.368062
413	Pavir.Ea00612.1	Pavir.Ea00612.1	1480	22244	64	64	8	8	58.3	90093	1	1	1	696.867	1391.72	2	1391.72	-0.0008	0	36.01	24	27	0.0074	R	GDGELEAELR	A			File845 Spectrum429117 scans: 9410	8010.06	13011.3	10052.7	10593.8	17541.5	27560.3	30659.5	26896.2	12.9676	13.6675	13.2953	13.3709	14.0985	14.7503	14.904	14.7151	13.3253	-0.357728	0.34215	-0.0300229
413	Pavir.Ea00612.1	Pavir.Ea00612.1	1480	22244	64	64	8	8	58.3	371651	1	1	1	877.416	2629.23	3	2629.23	-0.0067	0	68.63		27	3.9e-06	R	MIASVDGDGDGCVGFEEFK	K	Methylthio (C)	0.0000000000020000000.0	File839 Spectrum303285 scans: 23981	7391.01	6099.96	10143.5	9708.33	15697.3	19696.5	37548.4	38410.3	12.8516	12.5746	13.3083	13.245	13.9382	14.2657	15.1965	15.2292	12.9949	-0.143298	-0.420269	0.313413
413	Pavir.Ea00612.1	Pavir.Ea00612.1	1480	22244	64	64	8	8	58.3	90092	1	1	1	696.867	1391.72	2	1391.72	-0.0013	0	44.81	25	27	0.00091	R	GDGELEAELR	A			File845 Spectrum429186 scans: 9484	7225.3	10989.8	8134.48	7635.36	16420	27183.7	32451.3	25730.2	12.8188	13.4239	12.9898	12.8985	14.0032	14.7305	14.986	14.6512	13.0328	-0.213918	0.391121	-0.0429255
413	Pavir.Ea00612.1	Pavir.Ea00612.1	1480	22244	64	64	8	8	58.3	95686	1	1	1	470.962	1409.86	3	1409.87	-0.0077	0	29.69	26	28	0.042	R	ITAAELGK	V			File839 Spectrum291138 scans: 11024	6449.11	4928.94	5704.6	2933.83	14310.6	17783.7	23072.3	16413.5	12.6549	12.2671	12.4779	11.5186	13.8048	14.1183	14.4939	14.0026	12.2296	0.425279	0.0374559	0.248303
413	Pavir.Ea00612.1	Pavir.Ea00612.1	1480	22244	64	64	8	8	58.3	220440	1	1	1	901.415	1800.81	2	1800.82	-0.0029	0	36.13		22	0.0022	R	EVAAMMDELDADR	D	2 Oxidation (M)	0.0000330000000.0	File845 Spectrum428097 scans: 8322	6180	10857.6	7162.4	8146.32	5996.53	8561.5	13292.1	16772.3	12.5934	13.4064	12.8062	12.9919	12.5499	13.0636	13.6983	14.0338	12.9495	-0.356103	0.456928	-0.143265
413	Pavir.Ea00612.1	Pavir.Ea00612.1	1480	22244	64	64	8	8	58.3	220436	1	1	1	901.414	1800.81	2	1800.82	-0.0042	0	47.8		22	0.00015	R	EVAAMMDELDADR	D	2 Oxidation (M)	0.0000330000000.0	File845 Spectrum428113 scans: 8339	5919.99	10320.1	7637.48	8793.33	5960.72	9914.12	14081.8	18319.4	12.5314	13.3332	12.8989	13.1022	12.5413	13.2753	13.7815	14.1611	12.9664	-0.435028	0.366766	-0.067526
413	Pavir.Ea00612.1	Pavir.Ea00612.1	1480	22244	64	64	8	8	58.3	386875	1	1	1	926.802	2777.39	3	2777.39	-0.0083	0	37.55		30	0.011	K	MMAPQPQGSAADAAAPGGGLPDK	A	2 Oxidation (M)	0.33000000000000000000000.0	File833 Spectrum149824 scans: 9298	5642.63	14612.8	5858.63	6372.08	6719.1	10209	15502.2	11693.5	12.4622	13.8349	12.5163	12.6375	12.7141	13.3176	13.9202	13.5134	12.8627	-0.400596	0.972196	-0.346401
413	Pavir.Ea00612.1	Pavir.Ea00612.1	1480	22244	64	64	8	8	58.3	385498	1	1	1	921.473	2761.4	3	2761.4	-0.0014	0	38.29	16	31	0.01	K	MMAPQPQGSAADAAAPGGGLPDK	A	Oxidation (M)	0.03000000000000000000000.0	File835 Spectrum200935 scans: 10897	5315.47	22182.6	5381.24	5455.64	8726.23	14240.3	23083.6	18039.2	12.376	14.4371	12.3937	12.4135	13.0911	13.7977	14.4946	14.1388	12.9051	-0.529114	1.53204	-0.51137
413	Pavir.Ea00612.1	Pavir.Ea00612.1	1480	22244	64	64	8	8	58.3	383987	1	1	1	916.141	2745.4	3	2745.4	-0.002	0	43.57	16	31	0.0031	K	MMAPQPQGSAADAAAPGGGLPDK	A			File839 Spectrum292340 scans: 12306	5212.88	26378.7	8719.01	9486.29	16343.4	20256.8	31619.6	25797.5	12.3479	14.6871	13.0899	13.2116	13.9964	14.3061	14.9485	14.6549	13.3341	-0.986267	1.35295	-0.244183
413	Pavir.Ea00612.1	Pavir.Ea00612.1	1480	22244	64	64	8	8	58.3	220441	1	1	1	901.415	1800.82	2	1800.82	-0.0019	0	45.86		22	0.00025	R	EVAAMMDELDADR	D	2 Oxidation (M)	0.0000330000000.0	File845 Spectrum428146 scans: 8374	4730.41	8173.7	5697.44	5298.6	4765.3	7609.58	12269	13890.9	12.2077	12.9968	12.4761	12.3714	12.2184	12.8936	13.5827	13.7619	12.513	-0.305255	0.48377	-0.0369066
413	Pavir.Ea00612.1	Pavir.Ea00612.1	1480	22244	64	64	8	8	58.3	220435	1	1	1	901.414	1800.81	2	1800.82	-0.0048	0	48.3		22	0.00013	R	EVAAMMDELDADR	D	2 Oxidation (M)	0.0000330000000.0	File845 Spectrum428122 scans: 8349	4716.07	10078.5	5752.77	7577.69	5949.79	8057.7	15110.1	16648.9	12.2034	13.299	12.49	12.8875	12.5386	12.9762	13.8832	14.0231	12.72	-0.516619	0.57901	-0.229946
413	Pavir.Ea00612.1	Pavir.Ea00612.1	1480	22244	64	64	8	8	58.3	371649	1	1	1	877.415	2629.22	3	2629.23	-0.008	0	65.49		27	8.1e-06	R	MIASVDGDGDGCVGFEEFK	K	Methylthio (C)	0.0000000000020000000.0	File837 Spectrum258136 scans: 22973	4485.69	6830.19	5896.28	5076.45	6754.58	8670.5	14821.8	13958.2	12.1311	12.7377	12.5256	12.3096	12.7217	13.0819	13.8554	13.7688	12.426	-0.294891	0.311706	0.0995847
413	Pavir.Ea00612.1	Pavir.Ea00612.1	1480	22244	64	64	8	8	58.3	385494	1	1	1	921.473	2761.4	3	2761.4	-0.0025	0	32.05	17	31	0.042	K	MMAPQPQGSAADAAAPGGGLPDK	A	Oxidation (M)	0.30000000000000000000000.0	File835 Spectrum200493 scans: 10426	4242.76	21598.9	5522.82	4455.81	12566.6	13956.4	29017.7	14171.2	12.0508	14.3987	12.4312	12.1215	13.6173	13.7686	14.8246	13.7907	12.7505	-0.69974	1.64814	-0.31934
413	Pavir.Ea00612.1	Pavir.Ea00612.1	1480	22244	64	64	8	8	58.3	192304	1	1	1	852.409	1702.8	2	1702.81	-0.0065	0	56.69		24	3.2e-05	R	AAFDVYDVDGDGR	I			File832 Spectrum131149 scans: 14597	4194.4	4945.64	4445.38	5966.82	10959.9	13614.7	18458.2	14956	12.0342	12.2719	12.1181	12.5427	13.4199	13.7329	14.172	13.8684	12.2418	-0.207508	0.0301847	-0.123665
413	Pavir.Ea00612.1	Pavir.Ea00612.1	1480	22244	64	64	8	8	58.3	371648	1	1	1	877.415	2629.22	3	2629.23	-0.0082	0	51.83		27	0.00019	R	MIASVDGDGDGCVGFEEFK	K	Methylthio (C)	0.0000000000020000000.0	File837 Spectrum258147 scans: 22985	3695.87	4694.4	3902.56	4409.44	5755.89	7387.68	10961.4	10774.2	11.8517	12.1967	11.9302	12.1064	12.4908	12.8509	13.4201	13.3953	12.0213	-0.169554	0.175473	-0.0910462
413	Pavir.Ea00612.1	Pavir.Ea00612.1	1480	22244	64	64	8	8	58.3	90077	1	1	1	464.912	1391.72	3	1391.72	-0.0045	0	39.5	20	26	0.0026	R	GDGELEAELR	A			File845 Spectrum429633 scans: 9961	3438.13	27339.4	10924.6	10631.5	9293.76	13546.5	17567.2	9176.54	11.7474	14.7387	13.4153	13.3761	13.182	13.7256	14.1006	13.1637	13.3194	-1.57196	1.41933	0.0959248
413	Pavir.Ea00612.1	Pavir.Ea00612.1	1480	22244	64	64	8	8	58.3	371652	1	1	1	877.417	2629.23	3	2629.23	-0.0031	0	62.17		27	1.8e-05	R	MIASVDGDGDGCVGFEEFK	K	Methylthio (C)	0.0000000000020000000.0	File837 Spectrum258182 scans: 23022	3365.68	3717.69	3996.74	4194.62	5069.18	7461.7	10381.9	10668.8	11.7167	11.8602	11.9646	12.0343	12.3075	12.8653	13.3418	13.3811	11.894	-0.177268	-0.0337599	0.0706557
413	Pavir.Ea00612.1	Pavir.Ea00612.1	1480	22244	64	64	8	8	58.3	439152	1	1	1	859.403	3433.58	4	3433.59	-0.0022	1	56.38	18	28	7.4e-05	R	EVAAMMDELDADRDGYVDLGEFAAFHAR	A	Oxidation (M)	0.0000300000000000000000000000.0	File837 Spectrum258307 scans: 23156	3160.5	2018.47	4176.42	2959.07	6372.33	9469.29	9836.96	7169.7	11.6259	10.979	12.028	11.5309	12.6376	13.209	13.264	12.8077	11.541	0.0849442	-0.561941	0.487059
413	Pavir.Ea00612.1	Pavir.Ea00612.1	1480	22244	64	64	8	8	58.3	220442	1	1	1	901.416	1800.82	2	1800.82	-0.0005	0	48.48		22	0.00014	R	EVAAMMDELDADR	D	2 Oxidation (M)	0.0000330000000.0	File845 Spectrum428168 scans: 8398	2955.43	6062.2	3368.78	4399.19	3151.78	6591.75	10183.9	11592.6	11.5292	12.5656	11.718	12.103	11.622	12.6864	13.314	13.5009	11.979	-0.449799	0.586672	-0.260942
413	Pavir.Ea00612.1	Pavir.Ea00612.1	1480	22244	64	64	8	8	58.3	438562	1	1	1	855.404	3417.59	4	3417.59	-0.0044	1	53.77		28	0.00015	R	EVAAMMDELDADRDGYVDLGEFAAFHAR	A			File842 Spectrum375794 scans: 27971	2894.9	3412.56	3092.34	2450.11	6313.3	8420.76	11329.2	8122.67	11.4993	11.7366	11.5945	11.2586	12.6242	13.0397	13.4678	12.9877	11.5223	-0.0229628	0.214376	0.0722201
413	Pavir.Ea00612.1	Pavir.Ea00612.1	1480	22244	64	64	8	8	58.3	385495	1	1	1	921.473	2761.4	3	2761.4	-0.0023	0	35.91		31	0.017	K	MMAPQPQGSAADAAAPGGGLPDK	A	Oxidation (M)	0.03000000000000000000000.0	File835 Spectrum200972 scans: 10937	2815.78	23779.5	7525.49	8063.47	14606.9	25206.6	29566.8	27456.7	11.4593	14.5374	12.8776	12.9772	13.8344	14.6215	14.8517	14.7449	12.9629	-1.50356	1.57455	-0.0853072
413	Pavir.Ea00612.1	Pavir.Ea00612.1	1480	22244	64	64	8	8	58.3	371645	1	1	1	877.413	2629.22	3	2629.23	-0.0155	0	70.11		27	2.6e-06	R	MIASVDGDGDGCVGFEEFK	K	Methylthio (C)	0.0000000000020000000.0	File837 Spectrum258214 scans: 23056	2649.95	3690.71	3019.04	3156.56	3415.1	6402.09	11434.9	7749.33	11.3717	11.8497	11.5599	11.6241	11.7377	12.6443	13.4812	12.9199	11.6014	-0.229611	0.248321	-0.041488
413	Pavir.Ea00612.1	Pavir.Ea00612.1	1480	22244	64	64	8	8	58.3	371646	1	1	1	877.413	2629.22	3	2629.23	-0.0142	0	60.15		27	2.6e-05	R	MIASVDGDGDGCVGFEEFK	K	Methylthio (C)	0.0000000000020000000.0	File837 Spectrum258237 scans: 23081	2547.63	1612.89	3139.56	2716.3	2986.13	3883.32	7708.72	7306.48	11.3149	10.6554	11.6163	11.4074	11.5441	11.9231	12.9123	12.835	11.2485	0.0664028	-0.593106	0.367813
413	Pavir.Ea00612.1	Pavir.Ea00612.1	1480	22244	64	64	8	8	58.3	439151	1	1	1	859.403	3433.58	4	3433.59	-0.0024	1	48.04		28	0.00051	R	EVAAMMDELDADRDGYVDLGEFAAFHAR	A	Oxidation (M)	0.0000300000000000000000000000.0	File837 Spectrum258177 scans: 23017	2430.01	2720.78	3001.21	1941.1	4641.55	6154.24	6808.47	7697.75	11.2467	11.4098	11.5513	10.9227	12.1804	12.5874	12.7331	12.9102	11.2826	-0.035886	0.127168	0.268693
413	Pavir.Ea00612.1	Pavir.Ea00612.1	1480	22244	64	64	8	8	58.3	220439	1	1	1	601.279	1800.81	3	1800.82	-0.0036	0	36.12		22	0.0022	R	EVAAMMDELDADR	D	2 Oxidation (M)	0.0000330000000.0	File844 Spectrum404110 scans: 8022	2291.08	4189.09	3618.57	4764.98	2190.69	3432.78	2819.18	3466.57	11.1618	12.0324	11.8212	12.2183	11.0972	11.7452	11.4611	11.7593	11.8084	-0.646611	0.223999	0.0127811
413	Pavir.Ea00612.1	Pavir.Ea00612.1	1480	22244	64	64	8	8	58.3	220437	1	1	1	901.414	1800.81	2	1800.82	-0.0038	0	55.06		22	2.8e-05	R	EVAAMMDELDADR	D	2 Oxidation (M)	0.0000330000000.0	File844 Spectrum404095 scans: 8006	2256.13	4486.78	2450.73	3336.53	3004.05	4162.86	7474.11	8851.41	11.1396	12.1315	11.259	11.7041	11.5527	12.0234	12.8677	13.1117	11.5586	-0.418925	0.572907	-0.299559
413	Pavir.Ea00612.1	Pavir.Ea00612.1	1480	22244	64	64	8	8	58.3	439150	1	1	1	859.403	3433.58	4	3433.59	-0.0032	1	52.58	18	28	0.00018	R	EVAAMMDELDADRDGYVDLGEFAAFHAR	A	Oxidation (M)	0.0000300000000000000000000000.0	File837 Spectrum258246 scans: 23091	2143.5	6042.94	4459.09	4160.13	6348.65	10115.2	10235.6	11278.7	11.0657	12.561	12.1225	12.0224	12.6322	13.3042	13.3213	13.4613	11.9429	-0.877183	0.618102	0.179602
413	Pavir.Ea00612.1	Pavir.Ea00612.1	1480	22244	64	64	8	8	58.3	220434	1	1	1	601.278	1800.81	3	1800.82	-0.0065	0	37.38		22	0.0015	R	EVAAMMDELDADR	D	2 Oxidation (M)	0.0000330000000.0	File844 Spectrum404088 scans: 7999	1848.43	5586.79	3941.7	4046.7	2927.45	3024.93	3774.39	6010.44	10.8521	12.4478	11.9446	11.9825	11.5154	11.5627	11.882	12.5533	11.8068	-0.954673	0.64105	0.137847
413	Pavir.Ea00612.1	Pavir.Ea00612.1	1480	22244	64	64	8	8	58.3	220438	1	1	1	901.414	1800.81	2	1800.82	-0.0037	0	48.44		22	0.00013	R	EVAAMMDELDADR	D	2 Oxidation (M)	0.0000330000000.0	File844 Spectrum404114 scans: 8026	1848.25	4343.1	2375.7	3573.19	3046.19	4129.67	6782.13	8170.87	10.8519	12.0845	11.2141	11.803	11.5728	12.0118	12.7275	12.9963	11.4884	-0.636454	0.596115	-0.274261
413	Pavir.Ea00612.1	Pavir.Ea00612.1	1480	22244	64	64	8	8	58.3	439153	1	1	1	859.404	3433.59	4	3433.59	-0.0005	1	51.6		28	0.00023	R	EVAAMMDELDADRDGYVDLGEFAAFHAR	A	Oxidation (M)	0.0000300000000000000000000000.0	File837 Spectrum258357 scans: 23209	1255.41	2150.84	2858.01	2112.04	3599.37	4958.03	5520.54	5234.61	10.2939	11.0707	11.4808	11.0444	11.8135	12.2756	12.4306	12.3539	10.9725	-0.678518	0.0982247	0.508336
426	Pavir.Ib00373.1	Pavir.Ib00373.1	1445	23143	38	38	8	8	43.6	73297	1	1	1	667.869	1333.72	2	1333.73	-0.0029	0	48.36	25	29	0.00062	R	VAAAAGVSDNR	K			File836 Spectrum220180 scans: 6045	4687.22	15658.9	4243.75	9015.54	26377.4	91383.4	31619.5	36717.4	12.1945	13.9347	12.0511	13.1382	14.687	16.4796	14.9485	15.1642	12.8296	-0.635117	1.10506	-0.778509
426	Pavir.Ib00373.1	Pavir.Ib00373.1	1445	23143	38	38	8	8	43.6	394059	1	1	1	950.197	2847.57	3	2847.58	-0.0099	1	33.78		30	0.024	R	KVTIGEALEATALAAGDEPVER	S			File842 Spectrum370997 scans: 22854	3712.55	5259.41	4124.72	5494.07	6133.31	9454.01	7453.33	8712.39	11.8582	12.3607	12.0101	12.4237	12.5825	13.2067	12.8637	13.0889	12.1632	-0.30496	0.197531	-0.153075
426	Pavir.Ib00373.1	Pavir.Ib00373.1	1445	23143	38	38	8	8	43.6	394060	1	1	1	712.9	2847.57	4	2847.58	-0.0081	1	35.22	23	30	0.017	R	KVTIGEALEATALAAGDEPVER	S			File842 Spectrum371081 scans: 22944	3108.64	2270.21	3136.27	2936.64	2120.26	4772.27	2397.49	2663.83	11.6021	11.1486	11.6148	11.52	11.05	12.2205	11.2273	11.3793	11.4714	0.130703	-0.322758	0.143468
426	Pavir.Ib00373.1	Pavir.Ib00373.1	1445	23143	38	38	8	8	43.6	394062	1	1	1	950.2	2847.58	3	2847.58	-0.0023	1	47.36		30	0.001	R	KVTIGEALEATALAAGDEPVER	S			File842 Spectrum371074 scans: 22936	2813.81	2271.51	1508.72	4038.8	3985.95	8842.29	5188.63	6032.86	11.4583	11.1494	10.5591	11.9797	11.9607	13.1102	12.3411	12.5586	11.2866	0.171669	-0.137209	-0.727529
426	Pavir.Ib00373.1	Pavir.Ib00373.1	1445	23143	38	38	8	8	43.6	73299	1	1	1	667.87	1333.73	2	1333.73	-0.0004	0	42.84	23	29	0.0024	R	VAAAAGVSDNR	K			File836 Spectrum220115 scans: 5975	2792.78	7656.03	3842.65	5116.13	7467.15	20079.6	7957.6	10192.3	11.4475	12.9024	11.9079	12.3208	12.8663	14.2934	12.9581	13.3152	12.1446	-0.697162	0.757733	-0.236761
426	Pavir.Ib00373.1	Pavir.Ib00373.1	1445	23143	38	38	8	8	43.6	345031	1	1	1	806.1	2415.28	3	2415.28	-0.0028	0	68.73	21	30	8.4e-06	K	VTIGEALEATALAAGDEPVER	S			File840 Spectrum327657 scans: 26080	484.996	926.764	716.565	831.801	1363.4	1160.86	1297.87	850.161	8.92183	9.85606	9.48495	9.7001	10.413	10.181	10.3419	9.73159	9.49073	-0.568906	0.365324	-0.00577961
463	Pavir.J31919.1	Pavir.J31919.1	1374	30045	58	58	9	9	49	322768	1	1	1	757.415	2269.22	3	2269.23	-0.0021	0	44.5	16	30	0.0022	R	VSETVQPSTATGEEVK	E			File831 Spectrum102494 scans: 9019	3708	6661.54	3781.78	4317.54	19033.6	33723.5	15780.3	14821.5	11.8564	12.7016	11.8848	12.076	14.2163	15.0415	13.9458	13.8554	12.1297	-0.273302	0.571914	-0.244878
463	Pavir.J31919.1	Pavir.J31919.1	1374	30045	58	58	9	9	49	314092	1	1	1	739.378	2215.11	3	2215.12	-0.0045	0	72.2		29	2.8e-06	K	EGYAAEAPVIHGEEVGGAR	L			File831 Spectrum104442 scans: 11097	2827.87	6111.45	4121.35	1879.98	16061.6	25053.1	11542.7	8793.11	11.4655	12.5773	12.0089	10.8765	13.9713	14.6127	13.4947	13.1022	11.7321	-0.266551	0.845247	0.276851
463	Pavir.J31919.1	Pavir.J31919.1	1374	30045	58	58	9	9	49	322770	1	1	1	757.416	2269.23	3	2269.23	-0.0004	0	42.78		30	0.0033	R	VSETVQPSTATGEEVK	E			File830 Spectrum79061 scans: 9024	2302.77	10854.8	2224.72	2965.72	5289.64	7368.72	4033.81	3389.21	11.1692	13.4061	11.1194	11.5342	12.369	12.8472	11.9779	11.7267	11.8072	-0.638038	1.59886	-0.687787
463	Pavir.J31919.1	Pavir.J31919.1	1374	30045	58	58	9	9	49	322773	1	1	1	757.417	2269.23	3	2269.23	0.0018	0	46.82	17	30	0.0013	R	VSETVQPSTATGEEVK	E			File830 Spectrum79043 scans: 9005	1759.29	9941.08	1803.94	2525.93	8650.57	12358.2	7771.49	5792.93	10.7808	13.2792	10.8169	11.3026	13.0786	13.5932	12.924	12.5001	11.5449	-0.764099	1.73431	-0.727937
463	Pavir.J31919.1	Pavir.J31919.1	1374	30045	58	58	9	9	49	415027	1	1	1	760.438	3037.73	4	3037.72	0.0004	0	49.56	17	28	0.00035	K	VAGVGTAVAPNLRPQVGAGKPEDAR	S			File846 Spectrum455440 scans: 11848	1541.13	5143.29	2583.77	3844.68	35051.4	37228.8	18857.5	9870.52	10.5898	12.3285	11.3353	11.9086	15.0972	15.1841	14.2029	13.2689	11.5405	-0.950767	0.787935	-0.205276
463	Pavir.J31919.1	Pavir.J31919.1	1374	30045	58	58	9	9	49	314101	1	1	1	739.381	2215.12	3	2215.12	0.0026	0	72.72		29	2.5e-06	K	EGYAAEAPVIHGEEVGGAR	L			File830 Spectrum80646 scans: 10715	1329.7	4603.83	2249.98	2792.2	18056.7	24694.9	14257.5	8470.22	10.3769	12.1686	11.1357	11.4472	14.1402	14.5919	13.7994	13.0482	11.2821	-0.905209	0.886521	-0.146401
463	Pavir.J31919.1	Pavir.J31919.1	1374	30045	58	58	9	9	49	322764	1	1	1	757.414	2269.22	3	2269.23	-0.0048	0	41.4	19	30	0.0044	R	VSETVQPSTATGEEVK	E			File831 Spectrum102693 scans: 9231	1268.5	6089.48	3042.83	3094.36	4349.12	5566.19	4419.56	2620.11	10.3089	12.5721	11.5712	11.5954	12.0865	12.4425	12.1097	11.3554	11.5119	-1.20301	1.0602	0.05929
473	Pavir.J18834.1	Pavir.J18834.1	1358	49201	43	43	9	9	37.4	188619	1	1	1	564.311	1689.91	3	1689.91	-0.0027	0	38.92	21	29	0.0062	K	NAAAGTTEYGK	K			File831 Spectrum98561 scans: 4824	7516.74	60802.9	24358.6	19052.3	28636.9	35010.7	16991.6	18454	12.8759	15.8919	14.5721	14.2177	14.8056	15.0955	14.0525	14.1716	14.3894	-1.5135	1.50246	0.182753
473	Pavir.J18834.1	Pavir.J18834.1	1358	49201	43	43	9	9	37.4	188621	1	1	1	564.312	1689.91	3	1689.91	-0.0016	0	42.72	22	29	0.0026	K	NAAAGTTEYGK	K			File831 Spectrum98636 scans: 4904	6261.2	18193.3	6217.31	9071.51	24349.4	39573	20327.4	17321.6	12.6122	14.1511	12.6021	13.1471	14.5716	15.2722	14.3111	14.0803	13.1281	-0.515914	1.02299	-0.526062
473	Pavir.J18834.1	Pavir.J18834.1	1358	49201	43	43	9	9	37.4	188883	1	1	1	564.639	1690.9	3	1690.9	-0.0019	0	30.18		29	0.039	K	NAAAGTTEYGK	K	Deamidated (NQ)	0.10000000000.0	File828 Spectrum26783 scans: 5383	3629.66	18034	3165.46	3943.11	6999.48	9818.61	5023.35	5044.01	11.8256	14.1384	11.6282	11.9451	12.773	13.2613	12.2944	12.3004	12.3843	-0.558723	1.75409	-0.756143
473	Pavir.J18834.1	Pavir.J18834.1	1358	49201	43	43	9	9	37.4	188618	1	1	1	564.311	1689.91	3	1689.91	-0.0029	0	50.94	29	29	0.00039	K	NAAAGTTEYGK	K			File831 Spectrum98589 scans: 4854	3595.9	45675.7	20396	13579.7	31945.8	41430	19891.6	19025.8	11.8121	15.4791	14.316	13.7292	14.9633	15.3384	14.2799	14.2157	13.8341	-2.02197	1.64503	0.481888
473	Pavir.J18834.1	Pavir.J18834.1	1358	49201	43	43	9	9	37.4	188617	1	1	1	564.31	1689.91	3	1689.91	-0.0053	0	39.73	22	30	0.0053	K	NAAAGTTEYGK	K			File831 Spectrum98671 scans: 4941	3148.17	12490	4841.37	3376.3	8049.97	11933.3	8939.62	6762.72	11.6203	13.6085	12.2412	11.7212	12.9748	13.5427	13.126	12.7234	12.2978	-0.677507	1.31069	-0.0566022
473	Pavir.J18834.1	Pavir.J18834.1	1358	49201	43	43	9	9	37.4	416915	1	1	1	767.446	3065.76	4	3065.76	-0.0006	0	38.34		26	0.0035	K	VAGVGTVVAPNLRPQVGAGKPEDAR	S			File828 Spectrum34582 scans: 13703	2377.16	3004.44	2693.28	3377.56	19136.3	55461.5	20303.2	15236.3	11.215	11.5529	11.3952	11.7218	14.224	15.7592	14.3094	13.8952	11.4712	-0.256183	0.0816745	-0.0760541
473	Pavir.J18834.1	Pavir.J18834.1	1358	49201	43	43	9	9	37.4	348977	1	1	1	815.738	2444.19	3	2444.2	-0.0066	0	62.82	19	29	2.2e-05	R	SEAMPVSDTGAEAEEWK	D			File830 Spectrum83311 scans: 13557	2331.74	6061.59	3241.8	3092.49	8003.3	14617.3	8023.05	10354.9	11.1872	12.5655	11.6626	11.5946	12.9664	13.8354	12.9699	13.338	11.7525	-0.56526	0.81303	-0.0898717
473	Pavir.J18834.1	Pavir.J18834.1	1358	49201	43	43	9	9	37.4	416917	1	1	1	767.447	3065.76	4	3065.76	0.004	0	30.81		26	0.019	K	VAGVGTVVAPNLRPQVGAGKPEDAR	S			File828 Spectrum34659 scans: 13785	1448.25	3526.66	1096.15	2084.87	7183.58	15984.8	8627.42	6555.31	10.5001	11.7841	10.0982	11.0257	12.8105	13.9644	13.0747	12.6784	10.852	-0.351946	0.932047	-0.753805
473	Pavir.J18834.1	Pavir.J18834.1	1358	49201	43	43	9	9	37.4	350925	1	1	1	821.071	2460.19	3	2460.19	-0.0021	0	43.29		29	0.0019	R	SEAMPVSDTGAEAEEWK	D	Oxidation (M)	0.00030000000000000.0	File827 Spectrum7754 scans: 11405	1429.18	3653.1	2267.13	2859.93	7354.2	14422.7	7158.98	9074.51	10.481	11.8349	11.1467	11.4818	12.8444	13.8161	12.8055	13.1476	11.2361	-0.755104	0.598833	-0.0894206
473	Pavir.J18834.1	Pavir.J18834.1	1358	49201	43	43	9	9	37.4	348976	1	1	1	815.738	2444.19	3	2444.2	-0.0082	0	64.55		29	1.5e-05	R	SEAMPVSDTGAEAEEWK	D			File830 Spectrum83255 scans: 13498	1382.98	3528.25	2447.32	6948.04	13541.7	26165.6	14608.9	15651.1	10.4336	11.7847	11.257	12.7624	13.7251	14.6754	13.8346	13.934	11.5594	-1.12585	0.225316	-0.302434
521	Pavir.Da00234.1	Pavir.Da00234.1	1265	33770	49	49	7	7	30.1	314161	1	1	1	739.418	2215.23	3	2215.24	-0.0059	0	42.62	16	29	0.0027	K	GDALYAMELALALEK	L			File845 Spectrum446852 scans: 28328	48451.3	96104.7	75711	51016	177419	123847	205374	272101	15.5642	16.5523	16.2082	15.6387	17.4368	16.9182	17.6479	18.0538	15.9909	-0.426612	0.561458	0.217354
521	Pavir.Da00234.1	Pavir.Da00234.1	1265	33770	49	49	7	7	30.1	316720	1	1	1	744.75	2231.23	3	2231.23	-0.0065	0	58.78	18	30	7.7e-05	K	GDALYAMELALALEK	L	Oxidation (M)	0.000000300000000.0	File840 Spectrum326078 scans: 24396	25643.7	21981.6	15291	23022.7	44593.8	33767	46409.3	54352.9	14.6463	14.424	13.9004	14.4908	15.4446	15.0433	15.5021	15.7301	14.3654	0.280947	0.058635	-0.464979
521	Pavir.Da00234.1	Pavir.Da00234.1	1265	33770	49	49	7	7	30.1	331674	1	1	1	777.113	2328.32	3	2328.32	-0.0018	0	56.56	19	29	9.7e-05	K	EVLSGVVFQPFEEIK	G			File827 Spectrum21048 scans: 25586	23752.3	15928.6	12771.5	24573.9	48021.4	44596.8	53631.7	56707.3	14.5358	13.9593	13.6406	14.5848	15.5514	15.4447	15.7108	15.7912	14.1801	0.355634	-0.220817	-0.539509
521	Pavir.Da00234.1	Pavir.Da00234.1	1265	33770	49	49	7	7	30.1	13201	1	1	1	504.28	1006.55	2	1006.55	-0.003	0	34.93		28	0.012	K	LLEEEA	-			File829 Spectrum59005 scans: 13653	16376.7	26920.6	20022.6	14040.4	60094.3	50395.1	37109.2	42491.2	13.9994	14.7164	14.2893	13.7773	15.8749	15.621	15.1795	15.3749	14.1956	-0.196243	0.520817	0.0937355
521	Pavir.Da00234.1	Pavir.Da00234.1	1265	33770	49	49	7	7	30.1	316726	1	1	1	744.75	2231.23	3	2231.23	-0.0043	0	53.01	18	30	0.00028	K	GDALYAMELALALEK	L	Oxidation (M)	0.000000300000000.0	File840 Spectrum326155 scans: 24478	10099	16343.9	8808.26	15187.2	19614.1	22660.7	23875.4	25393.8	13.3019	13.9965	13.1046	13.8906	14.2596	14.4679	14.5432	14.6322	13.5734	-0.271472	0.423068	-0.468759
521	Pavir.Da00234.1	Pavir.Da00234.1	1265	33770	49	49	7	7	30.1	331668	1	1	1	777.112	2328.31	3	2328.32	-0.0054	0	58.76	21	29	6.3e-05	K	EVLSGVVFQPFEEIK	G			File846 Spectrum468324 scans: 25591	9533.34	7717.54	7605.21	8138.69	18057.3	17638.4	16255.4	18543.7	13.2188	12.9139	12.8928	12.9906	14.1403	14.1064	13.9886	14.1786	13.004	0.214754	-0.0900851	-0.111239
521	Pavir.Da00234.1	Pavir.Da00234.1	1265	33770	49	49	7	7	30.1	331669	1	1	1	583.086	2328.31	4	2328.32	-0.0046	0	37.58	19	29	0.0082	K	EVLSGVVFQPFEEIK	G			File827 Spectrum21077 scans: 25617	8916.33	5669.99	4053.58	4789.38	12293.4	9972.1	13922.5	14496.4	13.1222	12.4691	11.985	12.2256	13.5856	13.2837	13.7651	13.8234	12.4505	0.671742	0.0186382	-0.46551
521	Pavir.Da00234.1	Pavir.Da00234.1	1265	33770	49	49	7	7	30.1	331662	1	1	1	583.085	2328.31	4	2328.32	-0.0076	0	47.33	22	29	0.00091	K	EVLSGVVFQPFEEIK	G			File846 Spectrum468364 scans: 25634	6865.23	6773.74	4101.81	5480.77	10408.3	7832.98	9607.83	12848.3	12.7451	12.7257	12.002	12.4202	13.3454	12.9353	13.23	13.6493	12.4733	0.271833	0.252478	-0.471214
521	Pavir.Da00234.1	Pavir.Da00234.1	1265	33770	49	49	7	7	30.1	390646	1	1	1	940.222	2817.64	3	2817.64	0.0027	1	36.68		26	0.0047	K	GKEVLSGVVFQPFEEIK	G			File827 Spectrum18597 scans: 22971	6632.95	6187.47	7828.33	5160.77	13414.5	13824.8	11362.7	12063.5	12.6954	12.5951	12.9345	12.3334	13.7115	13.755	13.472	13.5584	12.6396	0.055828	-0.044474	0.294881
521	Pavir.Da00234.1	Pavir.Da00234.1	1265	33770	49	49	7	7	30.1	331664	1	1	1	777.111	2328.31	3	2328.32	-0.0069	0	51.66	19	29	0.00033	K	EVLSGVVFQPFEEIK	G			File846 Spectrum468529 scans: 25810	6326.4	5654.86	5223.59	5826.46	14389.2	9568.96	11190.1	11502.9	12.6272	12.4653	12.3508	12.5084	13.8127	13.2241	13.4499	13.4897	12.4879	0.139251	-0.0226437	-0.137092
521	Pavir.Da00234.1	Pavir.Da00234.1	1265	33770	49	49	7	7	30.1	331658	1	1	1	1165.16	2328.31	2	2328.32	-0.0096	0	58.45	23	29	7e-05	K	EVLSGVVFQPFEEIK	G			File827 Spectrum21119 scans: 25661	6192.28	8457.55	5928.58	8134.2	15549	14718.8	15830.8	16592.9	12.5963	13.046	12.5335	12.9898	13.9245	13.8454	13.9504	14.0183	12.7914	-0.195128	0.25464	-0.257913
521	Pavir.Da00234.1	Pavir.Da00234.1	1265	33770	49	49	7	7	30.1	331676	1	1	1	1165.17	2328.32	2	2328.32	-0.0004	0	57.76	18	29	7.5e-05	K	EVLSGVVFQPFEEIK	G			File827 Spectrum21088 scans: 25628	6020.97	7917.04	5084.72	6799.61	13545	12243.4	15852.1	14361.8	12.5558	12.9507	12.312	12.7312	13.7255	13.5797	13.9524	13.81	12.6374	-0.0816485	0.313318	-0.325477
521	Pavir.Da00234.1	Pavir.Da00234.1	1265	33770	49	49	7	7	30.1	316723	1	1	1	744.75	2231.23	3	2231.23	-0.0058	0	67.25	18	30	1.1e-05	K	GDALYAMELALALEK	L	Oxidation (M)	0.000000300000000.0	File840 Spectrum326008 scans: 24321	5316.36	8152.08	5558.09	7065.21	9435.09	11461.6	10020.5	10113.8	12.3762	12.993	12.4404	12.7865	13.2038	13.4845	13.2907	13.304	12.649	-0.272793	0.343936	-0.208643
521	Pavir.Da00234.1	Pavir.Da00234.1	1265	33770	49	49	7	7	30.1	331675	1	1	1	777.113	2328.32	3	2328.32	-0.0014	0	54.38	20	29	0.00016	K	EVLSGVVFQPFEEIK	G			File827 Spectrum21259 scans: 25811	5278.08	5174.05	5775.33	5956.07	11094.8	7341.16	13513.1	10558.9	12.3658	12.3371	12.4957	12.5401	13.4376	12.8418	13.7221	13.3662	12.4347	-0.0688807	-0.0975983	0.0610101
521	Pavir.Da00234.1	Pavir.Da00234.1	1265	33770	49	49	7	7	30.1	331659	1	1	1	1165.16	2328.31	2	2328.32	-0.0089	0	41.07	18	29	0.0038	K	EVLSGVVFQPFEEIK	G			File846 Spectrum468420 scans: 25693	5188.88	5141.59	4364.87	6659.85	13716.1	8904.51	13650.7	10339.2	12.3412	12.328	12.0917	12.7013	13.7436	13.1203	13.7367	13.3358	12.3656	-0.0243424	-0.0375529	-0.273828
521	Pavir.Da00234.1	Pavir.Da00234.1	1265	33770	49	49	7	7	30.1	331666	1	1	1	1165.16	2328.31	2	2328.32	-0.006	0	49.67	22	29	0.00053	K	EVLSGVVFQPFEEIK	G			File846 Spectrum468391 scans: 25662	5007.39	6457.11	4747.68	6013.33	12766.3	11346.5	13388.2	12511.9	12.2898	12.6567	12.213	12.5539	13.6401	13.47	13.7087	13.611	12.4284	-0.138526	0.228305	-0.21536
521	Pavir.Da00234.1	Pavir.Da00234.1	1265	33770	49	49	7	7	30.1	331657	1	1	1	1165.16	2328.31	2	2328.32	-0.0099	0	58.2	22	30	7.6e-05	K	EVLSGVVFQPFEEIK	G			File846 Spectrum468436 scans: 25710	4955.42	5038.6	3973.18	5103.98	12033.9	9617.76	11175.7	10090.3	12.2748	12.2988	11.9561	12.3174	13.5548	13.2315	13.4481	13.3007	12.2118	0.0630202	0.0870362	-0.255692
521	Pavir.Da00234.1	Pavir.Da00234.1	1265	33770	49	49	7	7	30.1	316728	1	1	1	744.75	2231.23	3	2231.23	-0.0034	0	56.02	18	30	0.00014	K	GDALYAMELALALEK	L	Oxidation (M)	0.000000300000000.0	File841 Spectrum349419 scans: 24369	3696.13	6146.35	4179.24	7589.91	10239.2	8663.89	8280.03	10123.9	11.8518	12.5855	12.029	12.8899	13.3218	13.0808	13.0154	13.3055	12.3391	-0.487251	0.246462	-0.310025
521	Pavir.Da00234.1	Pavir.Da00234.1	1265	33770	49	49	7	7	30.1	331667	1	1	1	1165.16	2328.31	2	2328.32	-0.0057	0	55.19	18	29	0.00014	K	EVLSGVVFQPFEEIK	G			File846 Spectrum468447 scans: 25722	3678.82	4088.47	2595	4121.94	9326.17	6589.55	7619.81	7871.53	11.845	11.9973	11.3415	12.0091	13.1871	12.686	12.8955	12.9424	11.7982	0.0467765	0.199095	-0.45673
521	Pavir.Da00234.1	Pavir.Da00234.1	1265	33770	49	49	7	7	30.1	316729	1	1	1	744.751	2231.23	3	2231.23	-0.003	0	54.63	19	30	0.00019	K	GDALYAMELALALEK	L	Oxidation (M)	0.000000300000000.0	File840 Spectrum326199 scans: 24525	3649.75	3198.28	2855.28	3524.66	5420.37	6124.17	4601.43	6509.34	11.8336	11.6431	11.4794	11.7833	12.4042	12.5803	12.1679	12.6683	11.6848	0.148746	-0.041757	-0.205421
521	Pavir.Da00234.1	Pavir.Da00234.1	1265	33770	49	49	7	7	30.1	316722	1	1	1	744.75	2231.23	3	2231.23	-0.0062	0	35.97	17	30	0.014	K	GDALYAMELALALEK	L	Oxidation (M)	0.000000300000000.0	File845 Spectrum442916 scans: 24129	2100.74	3239.83	3353.31	3250.06	3259.51	4689.58	3288.66	6374.81	11.0367	11.6617	11.7114	11.6662	11.6704	12.1952	11.6833	12.6382	11.519	-0.482322	0.142701	0.192372
521	Pavir.Da00234.1	Pavir.Da00234.1	1265	33770	49	49	7	7	30.1	316727	1	1	1	558.815	2231.23	4	2231.23	-0.0038	0	37.88	18	30	0.009	K	GDALYAMELALALEK	L	Oxidation (M)	0.000000300000000.0	File840 Spectrum326131 scans: 24452	1541.45	2468.51	1155.25	2093.02	3044.11	1991.75	2693.42	3025.96	10.5901	11.2694	10.174	11.0314	11.5718	10.9598	11.3952	11.5632	10.7662	-0.17614	0.503208	-0.592227
521	Pavir.Da00234.1	Pavir.Da00234.1	1265	33770	49	49	7	7	30.1	316725	1	1	1	744.75	2231.23	3	2231.23	-0.0049	0	54.64	20	30	0.00019	K	GDALYAMELALALEK	L	Oxidation (M)	0.000000300000000.0	File841 Spectrum349572 scans: 24532	1511.92	2102.82	1538.71	2476.3	2594.5	3113.47	3213.61	3566.35	10.5622	11.0381	10.5875	11.274	11.3412	11.6043	11.65	11.8002	10.8654	-0.303273	0.172669	-0.277928
521	Pavir.Da00234.1	Pavir.Da00234.1	1265	33770	49	49	7	7	30.1	316716	1	1	1	558.814	2231.23	4	2231.23	-0.0075	0	32.78	18	30	0.031	K	GDALYAMELALALEK	L	Oxidation (M)	0.000000300000000.0	File841 Spectrum349466 scans: 24419	1330.02	1736.77	885.682	1942.6	3690.55	3642.42	3534.01	5338.87	10.3772	10.7622	9.79065	10.9238	11.8496	11.8307	11.7871	12.3823	10.4635	-0.086224	0.298728	-0.672814
521	Pavir.Da00234.1	Pavir.Da00234.1	1265	33770	49	49	7	7	30.1	314158	1	1	1	739.417	2215.23	3	2215.24	-0.0079	0	46.33	17	30	0.0012	K	GDALYAMELALALEK	L			File845 Spectrum446995 scans: 28480	1209.24	2005.28	1036.02	1693.87	2968.12	2134.12	2763.1	3166.1	10.2399	10.9696	10.0168	10.7261	11.5353	11.0594	11.4321	11.6285	10.4881	-0.248217	0.481482	-0.471268
521	Pavir.Da00234.1	Pavir.Da00234.1	1265	33770	49	49	7	7	30.1	316721	1	1	1	558.814	2231.23	4	2231.23	-0.0062	0	62.55	18	30	3.2e-05	K	GDALYAMELALALEK	L	Oxidation (M)	0.000000300000000.0	File841 Spectrum349516 scans: 24472	1171.79	1860.89	961.228	1751.67	2837.65	2487.55	2733.07	3123.5	10.1945	10.8618	9.90874	10.7745	11.4705	11.2805	11.4163	11.6089	10.4349	-0.240388	0.426898	-0.526146
521	Pavir.Da00234.1	Pavir.Da00234.1	1265	33770	49	49	7	7	30.1	314164	1	1	1	739.418	2215.23	3	2215.24	-0.0052	0	53.77	20	29	0.0002	K	GDALYAMELALALEK	L			File845 Spectrum447016 scans: 28502	1135.18	1399.29	1138.12	892.415	1316.28	1823.17	2035.86	2252.37	10.1487	10.4505	10.1524	9.80157	10.3623	10.8322	10.9914	11.1372	10.1383	0.0104062	0.312177	0.0141439
521	Pavir.Da00234.1	Pavir.Da00234.1	1265	33770	49	49	7	7	30.1	316730	1	1	1	744.751	2231.23	3	2231.23	-0.0027	0	50.51	20	30	0.00049	K	GDALYAMELALALEK	L	Oxidation (M)	0.000000300000000.0	File840 Spectrum326221 scans: 24548	972.629	1416.56	1302.37	1184.68	2213.05	1663.18	1405.92	3221.04	9.92575	10.4682	10.3469	10.2103	11.1118	10.6997	10.4573	11.6533	10.2378	-0.312037	0.230394	0.109145
521	Pavir.Da00234.1	Pavir.Da00234.1	1265	33770	49	49	7	7	30.1	316711	1	1	1	558.813	2231.22	4	2231.23	-0.0121	0	52.54	18	30	0.00032	K	GDALYAMELALALEK	L	Oxidation (M)	0.000000300000000.0	File840 Spectrum326047 scans: 24362	951.235	1244.26	567.572	1694.72	2023.03	1729.2	1898.45	2401.48	9.89366	10.2811	9.14866	10.7268	10.9823	10.7559	10.8906	11.2297	10.0126	-0.118897	0.268521	-0.863895
521	Pavir.Da00234.1	Pavir.Da00234.1	1265	33770	49	49	7	7	30.1	314172	1	1	1	739.419	2215.24	3	2215.24	-0.0031	0	45.89	17	29	0.0012	K	GDALYAMELALALEK	L			File845 Spectrum447045 scans: 28533	822.867	1161.57	767.037	1117.73	1344.44	1430.88	1644.21	2310.67	9.68452	10.1819	9.58315	10.1264	10.3928	10.4827	10.6832	11.1741	9.89397	-0.209455	0.287883	-0.310818
521	Pavir.Da00234.1	Pavir.Da00234.1	1265	33770	49	49	7	7	30.1	314165	1	1	1	739.418	2215.23	3	2215.24	-0.0048	0	48.48	19	29	0.00068	K	GDALYAMELALALEK	L			File845 Spectrum447083 scans: 28574	283.829	392.229	468.591	436.154	816.631	751.365	539.275	771.905	8.14888	8.61555	8.87218	8.76869	9.67354	9.55337	9.07488	9.59228	8.60133	-0.452447	0.014225	0.270857
544	Pavir.J06115.1	Pavir.J06115.1	1222	12977	54	54	4	4	40.5	145987	1	1	1	522.652	1564.93	3	1564.94	-0.0053	0	29.03	18	27	0.038	K	LGNAASIPSK	C			File841 Spectrum335152 scans: 9151	797603	507688	563068	789997	1.41491e+06	1.87723e+06	944462	1.22316e+06	19.6053	18.9536	19.1029	19.5915	20.4323	20.8402	19.8491	20.2222	19.3133	0.291979	-0.359749	-0.210384
544	Pavir.J06115.1	Pavir.J06115.1	1222	12977	54	54	4	4	40.5	145973	1	1	1	522.652	1564.93	3	1564.94	-0.0064	0	42.58	19	28	0.0018	K	LGNAASIPSK	C			File841 Spectrum335122 scans: 9119	517053	477413	573491	623967	920209	1.30917e+06	618291	1.06161e+06	18.98	18.8649	19.1294	19.2511	19.8116	20.3202	19.2379	20.0178	19.0563	-0.0763852	-0.19146	0.0730737
544	Pavir.J06115.1	Pavir.J06115.1	1222	12977	54	54	4	4	40.5	192850	1	1	1	853.373	1704.73	2	1704.74	-0.004	0	77.3		18	6.7e-08	R	GTGSGPSAACCSGVR	S	2 Methylthio (C)	0.000000000220000.0	File844 Spectrum407432 scans: 11566	286882	681323	33779.6	56986.2	109565	129447	61966.7	1.24559e+06	18.1301	19.378	15.0439	15.7983	16.7414	16.982	15.9192	20.2484	17.0876	1.04253	2.29041	-2.0437
544	Pavir.J06115.1	Pavir.J06115.1	1222	12977	54	54	4	4	40.5	192855	1	1	1	853.374	1704.73	2	1704.74	-0.0016	0	64.25		19	1.5e-06	R	GTGSGPSAACCSGVR	S	2 Methylthio (C)	0.000000000220000.0	File843 Spectrum383757 scans: 11303	282872	705340	32887.6	52913.1	83850.6	89050.8	54385.9	1.19289e+06	18.1098	19.428	15.0053	15.6913	16.3555	16.4423	15.7309	20.186	17.0586	1.0512	2.36937	-2.05333
544	Pavir.J06115.1	Pavir.J06115.1	1222	12977	54	54	4	4	40.5	145967	1	1	1	522.652	1564.93	3	1564.94	-0.0071	0	33.08	20	28	0.016	K	LGNAASIPSK	C			File841 Spectrum335092 scans: 9087	237616	191131	232950	212858	280205	505528	246842	363250	17.8583	17.5442	17.8297	17.6995	18.0961	18.9474	17.9132	18.4706	17.7329	0.125354	-0.188716	0.0967453
544	Pavir.J06115.1	Pavir.J06115.1	1222	12977	54	54	4	4	40.5	146369	1	1	1	783.968	1565.92	2	1565.92	-0.0023	0	38.42	18	29	0.007	K	LGNAASIPSK	C	Deamidated (NQ)	0.0010000000.0	File839 Spectrum290041 scans: 9854	217995	235996	255148	273572	447746	531733	389844	453950	17.7339	17.8484	17.961	18.0616	18.7723	19.0203	18.5725	18.7922	17.9012	-0.16728	-0.0528164	0.0597551
544	Pavir.J06115.1	Pavir.J06115.1	1222	12977	54	54	4	4	40.5	192852	1	1	1	853.374	1704.73	2	1704.74	-0.0027	0	73.33		18	1.8e-07	R	GTGSGPSAACCSGVR	S	2 Methylthio (C)	0.000000000220000.0	File844 Spectrum407341 scans: 11469	183851	442662	27189.6	27356.7	34618.7	70891	46937.4	762376	17.4882	18.7558	14.7308	14.7396	15.0793	16.1133	15.5185	19.5401	16.4286	1.05958	2.32725	-1.69783
544	Pavir.J06115.1	Pavir.J06115.1	1222	12977	54	54	4	4	40.5	146348	1	1	1	783.966	1565.92	2	1565.92	-0.0054	0	45.26	22	28	0.00097	K	LGNAASIPSK	C	Deamidated (NQ)	0.0010000000.0	File839 Spectrum290100 scans: 9917	183416	204416	209528	199115	390368	494599	325351	417737	17.4848	17.6411	17.6768	17.6032	18.5745	18.9159	18.3116	18.6722	17.6015	-0.116725	0.0396634	0.0753025
544	Pavir.J06115.1	Pavir.J06115.1	1222	12977	54	54	4	4	40.5	192849	1	1	1	853.373	1704.73	2	1704.74	-0.0044	0	79.03		18	4.6e-08	R	GTGSGPSAACCSGVR	S	2 Methylthio (C)	0.000000000220000.0	File844 Spectrum407491 scans: 11629	139950	307491	17633.9	24159.7	30434.1	53026.2	32785.7	566064	17.0946	18.2302	14.1061	14.5603	14.8934	15.6944	15.0008	19.1106	15.9978	1.09677	2.23241	-1.89172
544	Pavir.J06115.1	Pavir.J06115.1	1222	12977	54	54	4	4	40.5	146370	1	1	1	783.968	1565.92	2	1565.92	-0.0023	0	33.04		29	0.024	K	LGNAASIPSK	C	Deamidated (NQ)	0.0010000000.0	File839 Spectrum289939 scans: 9745	135882	160210	157553	156438	251230	298272	194755	266383	17.052	17.2896	17.2655	17.2552	17.9387	18.1863	17.5713	18.0231	17.2156	-0.163581	0.0740291	0.0498984
544	Pavir.J06115.1	Pavir.J06115.1	1222	12977	54	54	4	4	40.5	146351	1	1	1	522.98	1565.92	3	1565.92	-0.005	0	32.08	22	28	0.02	K	LGNAASIPSK	C	Deamidated (NQ)	0.0010000000.0	File839 Spectrum290761 scans: 10622	92017.2	98373	56158.9	70978.2	182205	156841	152990	177813	16.4896	16.586	15.7772	16.1151	17.4752	17.2589	17.2231	17.44	16.242	0.247639	0.343998	-0.464749
544	Pavir.J06115.1	Pavir.J06115.1	1222	12977	54	54	4	4	40.5	312508	1	1	1	1104.01	2206.01	2	2206.02	-0.007	0	67.24		25	3.4e-06	K	CGVSIPYTISPNVDCSR	V	2 Methylthio (C)	0.20000000000000200.0	File832 Spectrum138057 scans: 21967	79305.4	124057	14874.5	9723.3	6176.95	21734.4	13647.4	212344	16.2751	16.9206	13.8606	13.2472	12.5927	14.4077	13.7363	17.696	15.0759	1.19924	1.84476	-1.21534
544	Pavir.J06115.1	Pavir.J06115.1	1222	12977	54	54	4	4	40.5	146350	1	1	1	522.98	1565.92	3	1565.92	-0.005	0	32.88	23	28	0.017	K	LGNAASIPSK	C	Deamidated (NQ)	0.0010000000.0	File839 Spectrum290793 scans: 10656	75024.7	99202.4	121035	65435.7	113708	201930	97930.5	150345	16.1951	16.5981	16.8851	15.9978	16.795	17.6235	16.5795	17.1979	16.419	-0.223927	0.179082	0.466059
544	Pavir.J06115.1	Pavir.J06115.1	1222	12977	54	54	4	4	40.5	146372	1	1	1	783.968	1565.92	2	1565.92	-0.0019	0	45.7	27	29	0.0013	K	LGNAASIPSK	C	Deamidated (NQ)	0.0010000000.0	File839 Spectrum290192 scans: 10015	51722.4	50165.9	65607.8	63373.8	124328	132689	94664.8	136443	15.6585	15.6144	16.0016	15.9516	16.9238	17.0177	16.5305	17.0579	15.8065	-0.148023	-0.192104	0.195054
544	Pavir.J06115.1	Pavir.J06115.1	1222	12977	54	54	4	4	40.5	192858	1	1	1	853.375	1704.74	2	1704.74	-0.0008	0	65.91		19	1.1e-06	R	GTGSGPSAACCSGVR	S	2 Methylthio (C)	0.000000000220000.0	File843 Spectrum383850 scans: 11402	47877.5	121232	8596.69	9777.26	15330.2	19571.6	12206.9	207972	15.5471	16.8874	13.0696	13.2552	13.9041	14.2565	13.5754	17.666	14.6898	0.857248	2.1976	-1.62025
544	Pavir.J06115.1	Pavir.J06115.1	1222	12977	54	54	4	4	40.5	146365	1	1	1	783.968	1565.92	2	1565.92	-0.0029	0	33.73	17	29	0.02	K	LGNAASIPSK	C	Deamidated (NQ)	0.0010000000.0	File839 Spectrum290659 scans: 10513	44140.6	41322.5	52178.4	47354	75572.4	97468	67125.4	81215.4	15.4298	15.3346	15.6712	15.5312	16.2056	16.5726	16.0346	16.3095	15.4917	-0.0618876	-0.157066	0.17946
544	Pavir.J06115.1	Pavir.J06115.1	1222	12977	54	54	4	4	40.5	146363	1	1	1	522.981	1565.92	3	1565.92	-0.0033	0	29.85	21	29	0.049	K	LGNAASIPSK	C	Deamidated (NQ)	0.0010000000.0	File839 Spectrum289921 scans: 9726	43151.6	53245	31962.5	48109.7	55707.9	71405.2	54322.2	85756.1	15.3971	15.7004	14.9641	15.554	15.7656	16.1237	15.7293	16.388	15.4039	-0.00677842	0.296454	-0.439811
544	Pavir.J06115.1	Pavir.J06115.1	1222	12977	54	54	4	4	40.5	145993	1	1	1	783.475	1564.94	2	1564.94	-0.0045	0	32.45	17	27	0.017	K	LGNAASIPSK	C			File841 Spectrum335322 scans: 9332	42229.6	38508	45681.5	41069.7	78016.2	84876	68940.1	83211.1	15.366	15.2329	15.4793	15.3258	16.2515	16.3731	16.0731	16.3445	15.351	0.0149808	-0.118114	0.128335
544	Pavir.J06115.1	Pavir.J06115.1	1222	12977	54	54	4	4	40.5	146355	1	1	1	783.967	1565.92	2	1565.92	-0.0043	0	34.38	21	29	0.017	K	LGNAASIPSK	C	Deamidated (NQ)	0.0010000000.0	File839 Spectrum290838 scans: 10704	40088.1	43239.6	46178.8	42197.6	73262.1	81094.5	61324	80083.1	15.2909	15.4001	15.4949	15.3649	16.1608	16.3073	15.9042	16.2892	15.3877	-0.096804	0.0123722	0.107251
544	Pavir.J06115.1	Pavir.J06115.1	1222	12977	54	54	4	4	40.5	146357	1	1	1	522.981	1565.92	3	1565.92	-0.0042	0	31.06	18	29	0.037	K	LGNAASIPSK	C	Deamidated (NQ)	0.0010000000.0	File839 Spectrum290175 scans: 9997	34866.4	27820.9	36608	55051.2	74772.1	103262	54538.3	106654	15.0896	14.7639	15.1599	15.7485	16.1902	16.6559	15.735	16.7026	15.1904	-0.100896	-0.426565	-0.0305774
544	Pavir.J06115.1	Pavir.J06115.1	1222	12977	54	54	4	4	40.5	192853	1	1	1	853.374	1704.73	2	1704.74	-0.0026	0	78.48		18	5.5e-08	R	GTGSGPSAACCSGVR	S	2 Methylthio (C)	0.000000000220000.0	File843 Spectrum383672 scans: 11212	34320.6	85920	5357.94	6464.17	10013.9	13964.1	8519.67	139918	15.0668	16.3907	12.3875	12.6582	13.2897	13.7694	13.0566	17.0942	14.1258	0.940987	2.2649	-1.73834
544	Pavir.J06115.1	Pavir.J06115.1	1222	12977	54	54	4	4	40.5	312507	1	1	1	1104.01	2206.01	2	2206.02	-0.0074	0	83.79	23	25	7.5e-08	K	CGVSIPYTISPNVDCSR	V	2 Methylthio (C)	0.20000000000000200.0	File832 Spectrum138117 scans: 22031	34198.6	59887.7	5272.68	3972.04	4612	8896.96	7661.35	91272.1	15.0616	15.87	12.3643	11.9557	12.1712	13.1191	12.9034	16.4779	13.8129	1.24875	2.05707	-1.44858
544	Pavir.J06115.1	Pavir.J06115.1	1222	12977	54	54	4	4	40.5	312513	1	1	1	1104.02	2206.02	2	2206.02	-0.0033	0	60.82	21	25	1.5e-05	K	CGVSIPYTISPNVDCSR	V	2 Methylthio (C)	0.20000000000000200.0	File832 Spectrum137995 scans: 21900	24850.5	45885.7	4970.04	4519.2	3458.96	7745.21	5702.31	70183.4	14.601	15.4858	12.279	12.1419	11.7561	12.9191	12.4773	16.0988	13.6269	0.974075	1.85885	-1.34787
544	Pavir.J06115.1	Pavir.J06115.1	1222	12977	54	54	4	4	40.5	146349	1	1	1	522.98	1565.92	3	1565.92	-0.005	0	39.72	17	28	0.0035	K	LGNAASIPSK	C	Deamidated (NQ)	0.0010000000.0	File839 Spectrum290209 scans: 10033	24254.2	18521.9	25056.9	16275.4	53177.5	49453	38463.7	35013.2	14.5659	14.1769	14.6129	13.9904	15.6985	15.5938	15.2312	15.0956	14.3366	0.229394	-0.15961	0.276367
544	Pavir.J06115.1	Pavir.J06115.1	1222	12977	54	54	4	4	40.5	145963	1	1	1	522.651	1564.93	3	1564.94	-0.0081	0	32.38	20	28	0.019	K	LGNAASIPSK	C			File842 Spectrum358001 scans: 8992	23650.3	23940.6	19714.8	21596.5	36530.6	43351.6	34753	36952.8	14.5296	14.5472	14.267	14.3985	15.1568	15.4038	15.0849	15.1734	14.4356	0.0940118	0.111608	-0.168567
544	Pavir.J06115.1	Pavir.J06115.1	1222	12977	54	54	4	4	40.5	146361	1	1	1	783.967	1565.92	2	1565.92	-0.0035	0	33.7	18	29	0.02	K	LGNAASIPSK	C	Deamidated (NQ)	0.0010000000.0	File839 Spectrum290860 scans: 10727	21926	24142.6	20002.2	22546.5	36691.6	41718	29270.6	37311.6	14.4204	14.5593	14.2879	14.4606	15.1632	15.3484	14.8372	15.1873	14.432	-0.0116811	0.12726	-0.144161
544	Pavir.J06115.1	Pavir.J06115.1	1222	12977	54	54	4	4	40.5	146373	1	1	1	783.968	1565.92	2	1565.92	-0.0017	0	32.96		29	0.024	K	LGNAASIPSK	C	Deamidated (NQ)	0.0010000000.0	File839 Spectrum290230 scans: 10055	21912.4	16073.4	21315.8	20455.2	41110.8	47854.7	33678.3	44531.7	14.4195	13.9724	14.3796	14.3202	15.3272	15.5464	15.0395	15.4425	14.2729	0.146541	-0.300524	0.106721
544	Pavir.J06115.1	Pavir.J06115.1	1222	12977	54	54	4	4	40.5	145978	1	1	1	522.652	1564.93	3	1564.94	-0.0062	0	34.44	21	28	0.012	K	LGNAASIPSK	C			File842 Spectrum358058 scans: 9053	21219.1	16301.1	21793.5	14741.5	33724.7	32952.7	24643.9	30528.7	14.3731	13.9927	14.4116	13.8476	15.0415	15.0081	14.5889	14.8979	14.1562	0.216832	-0.163556	0.255372
544	Pavir.J06115.1	Pavir.J06115.1	1222	12977	54	54	4	4	40.5	146345	1	1	1	522.98	1565.92	3	1565.92	-0.0062	0	30.02	18	28	0.034	K	LGNAASIPSK	C	Deamidated (NQ)	0.0010000000.0	File839 Spectrum290655 scans: 10509	19832.8	28028.5	23284.4	28667.6	43973.1	55061.1	40690.6	49173.2	14.2756	14.7746	14.5071	14.8071	15.4243	15.7487	15.3124	15.5856	14.5911	-0.315501	0.183502	-0.0840306
544	Pavir.J06115.1	Pavir.J06115.1	1222	12977	54	54	4	4	40.5	192854	1	1	1	853.374	1704.73	2	1704.74	-0.0019	0	83.12		18	1.9e-08	R	GTGSGPSAACCSGVR	S	2 Methylthio (C)	0.000000000220000.0	File844 Spectrum407255 scans: 11377	17758.2	50511.3	3474.32	4407.26	4229.47	9180.19	5820.85	78513.5	14.1162	15.6243	11.7625	12.1057	12.0463	13.1643	12.507	16.2607	13.4022	0.714025	2.22214	-1.63966
544	Pavir.J06115.1	Pavir.J06115.1	1222	12977	54	54	4	4	40.5	145980	1	1	1	783.474	1564.93	2	1564.94	-0.0059	0	28.43		28	0.046	K	LGNAASIPSK	C			File842 Spectrum358036 scans: 9029	17057.3	17583.6	20810.9	19178.3	33712.8	37409.3	25530.9	32692.5	14.0581	14.1019	14.345	14.2272	15.041	15.1911	14.64	14.9967	14.1831	-0.124965	-0.0811319	0.161978
544	Pavir.J06115.1	Pavir.J06115.1	1222	12977	54	54	4	4	40.5	145979	1	1	1	783.474	1564.93	2	1564.94	-0.006	0	29.85	16	28	0.033	K	LGNAASIPSK	C			File842 Spectrum358024 scans: 9016	16584.8	21288.7	21452.5	19709.2	34539.5	37745	27235.9	30786.5	14.0176	14.3778	14.3889	14.2666	15.076	15.204	14.7332	14.91	14.2627	-0.245129	0.115096	0.126155
544	Pavir.J06115.1	Pavir.J06115.1	1222	12977	54	54	4	4	40.5	145988	1	1	1	783.475	1564.93	2	1564.94	-0.0051	0	32.89	19	27	0.015	K	LGNAASIPSK	C			File842 Spectrum358051 scans: 9045	13731.8	16199.9	17722.2	16359.9	30296	28151	22963.4	28095.8	13.7452	13.9837	14.1133	13.9979	14.8868	14.7809	14.487	14.7781	13.96	-0.214782	0.0236819	0.153247
544	Pavir.J06115.1	Pavir.J06115.1	1222	12977	54	54	4	4	40.5	146358	1	1	1	522.981	1565.92	3	1565.92	-0.004	0	35.61	24	29	0.013	K	LGNAASIPSK	C	Deamidated (NQ)	0.0010000000.0	File839 Spectrum290870 scans: 10738	13409.5	17996.5	17061.7	16196.5	21578.9	27220.7	14859.9	23600	13.711	14.1354	14.0585	13.9834	14.3973	14.7324	13.8591	14.5265	13.9721	-0.261097	0.16336	0.0864069
544	Pavir.J06115.1	Pavir.J06115.1	1222	12977	54	54	4	4	40.5	145990	1	1	1	783.475	1564.93	2	1564.94	-0.0049	0	28.76	19	27	0.04	K	LGNAASIPSK	C			File842 Spectrum358070 scans: 9065	11407.6	12824.8	14367.2	12525.9	22417.1	24944.5	21860.5	22075.3	13.4777	13.6466	13.8105	13.6126	14.4523	14.6064	14.416	14.4301	13.6369	-0.159161	0.0097766	0.173623
544	Pavir.J06115.1	Pavir.J06115.1	1222	12977	54	54	4	4	40.5	312512	1	1	1	736.346	2206.02	3	2206.02	-0.0041	0	27.14	15	25	0.035	K	CGVSIPYTISPNVDCSR	V	2 Methylthio (C)	0.20000000000000200.0	File833 Spectrum159040 scans: 19129	10921.9	11494.4	2505.34	2731.84	1552.27	3043.85	2877.13	21660.4	13.4149	13.4886	11.2908	11.4157	10.6002	11.5717	11.4904	14.4028	12.4025	1.01243	1.08614	-1.11172
544	Pavir.J06115.1	Pavir.J06115.1	1222	12977	54	54	4	4	40.5	146360	1	1	1	522.981	1565.92	3	1565.92	-0.0037	0	36.09	24	29	0.012	K	LGNAASIPSK	C	Deamidated (NQ)	0.0010000000.0	File839 Spectrum290240 scans: 10066	10801	10247.8	10607	8757.83	17076.4	15727.5	9898.09	18330.7	13.3989	13.323	13.3727	13.0964	14.0597	13.941	13.2729	14.162	13.2977	0.101133	0.0252743	0.0749825
544	Pavir.J06115.1	Pavir.J06115.1	1222	12977	54	54	4	4	40.5	145991	1	1	1	522.652	1564.94	3	1564.94	-0.0046	0	29.46		27	0.034	K	LGNAASIPSK	C			File841 Spectrum335398 scans: 9413	9733.55	10376.1	14830.4	8873.41	17370	13409	11247.2	8531.88	13.2487	13.341	13.8563	13.1153	14.0843	13.7109	13.4573	13.0586	13.3903	-0.141568	-0.0493385	0.465951
544	Pavir.J06115.1	Pavir.J06115.1	1222	12977	54	54	4	4	40.5	192848	1	1	1	569.251	1704.73	3	1704.74	-0.0051	0	41.39		18	0.00027	R	GTGSGPSAACCSGVR	S	2 Methylthio (C)	0.000000000220000.0	File844 Spectrum407249 scans: 11370	6705.24	10788.4	5109.57	5086.72	4825.25	4449.5	6009.97	15774.5	12.7111	13.3972	12.319	12.3125	12.2364	12.1194	12.5531	13.9453	12.6849	0.0261313	0.71225	-0.365958
544	Pavir.J06115.1	Pavir.J06115.1	1222	12977	54	54	4	4	40.5	312514	1	1	1	736.347	2206.02	3	2206.02	-0.0015	0	55.25		25	5.6e-05	K	CGVSIPYTISPNVDCSR	V	2 Methylthio (C)	0.20000000000000200.0	File833 Spectrum158855 scans: 18931	6267.28	10800.5	2545	3659.74	1769.13	1849.16	1957.44	13846.1	12.6136	13.3988	11.3134	11.8375	10.7888	10.8527	10.9347	13.7572	12.2909	0.322772	1.10796	-0.977403
544	Pavir.J06115.1	Pavir.J06115.1	1222	12977	54	54	4	4	40.5	312510	1	1	1	736.345	2206.01	3	2206.02	-0.0061	0	65.3		25	5.3e-06	K	CGVSIPYTISPNVDCSR	V	2 Methylthio (C)	0.20000000000000200.0	File833 Spectrum158864 scans: 18941	6052.96	8646.93	2048.17	3090.97	2714.74	2232.22	1697.08	13195.8	12.5634	13.078	11.0001	11.5938	11.4066	11.1243	10.7288	13.6878	12.0588	0.504584	1.01913	-1.05872
544	Pavir.J06115.1	Pavir.J06115.1	1222	12977	54	54	4	4	40.5	192856	1	1	1	569.252	1704.73	3	1704.74	-0.0015	0	19.41		19	0.046	R	GTGSGPSAACCSGVR	S	2 Methylthio (C)	0.000000000220000.0	File843 Spectrum383654 scans: 11193	5444.52	10138.5	4821.43	2675.23	5886.15	2062.54	3242.71	7535.19	12.4106	13.3076	12.2352	11.3854	12.5231	11.0102	11.663	12.8794	12.3347	0.0758785	0.972846	-0.0994628
544	Pavir.J06115.1	Pavir.J06115.1	1222	12977	54	54	4	4	40.5	146371	1	1	1	522.981	1565.92	3	1565.92	-0.0022	0	35.7	21	29	0.013	K	LGNAASIPSK	C	Deamidated (NQ)	0.0010000000.0	File839 Spectrum290255 scans: 10082	5014.21	7387.56	6180.72	4679.65	7749.88	7276.05	6685.74	9238.2	12.2918	12.8509	12.5936	12.1922	12.92	12.8289	12.7069	13.1734	12.4821	-0.190302	0.368773	0.111451
544	Pavir.J06115.1	Pavir.J06115.1	1222	12977	54	54	4	4	40.5	312502	1	1	1	736.343	2206.01	3	2206.02	-0.0118	0	42.13		24	0.00095	K	CGVSIPYTISPNVDCSR	V	2 Methylthio (C)	0.20000000000000200.0	File833 Spectrum158842 scans: 18917	3937.66	7644.21	1706	2215.03	1965.48	1622.73	1901.32	8906.34	11.9431	12.9002	10.7364	11.1131	10.9407	10.6642	10.8928	13.1206	11.6732	0.269926	1.22695	-0.936796
583	Pavir.Cb00761.1	Pavir.Cb00761.1	1161	34961	55	55	5	5	25	181921	1	1	1	834.925	1667.84	2	1667.84	-0.0063	0	44.17	17	27	0.001	R	QTFSSGPDEQLR	K			File832 Spectrum125443 scans: 8511	24224.1	32761.3	30784.7	29297.4	87370.5	144356	77292.3	88749.5	14.5642	14.9997	14.9099	14.8385	16.4149	17.1393	16.238	16.4375	14.8281	-0.263913	0.171637	0.081861
583	Pavir.Cb00761.1	Pavir.Cb00761.1	1161	34961	55	55	5	5	25	176479	1	1	1	551.665	1651.97	3	1651.98	-0.0047	0	32.49	24	29	0.025	K	VAAVEPVTMK	E			File837 Spectrum247552 scans: 11684	12811.2	14352.6	19695.7	18571.2	55471.9	107247	46866.5	44655	13.6451	13.809	14.2656	14.1808	15.7595	16.7106	15.5163	15.4465	13.9751	-0.33001	-0.166106	0.290465
583	Pavir.Cb00761.1	Pavir.Cb00761.1	1161	34961	55	55	5	5	25	182150	1	1	1	556.999	1667.97	3	1667.97	-0.0004	0	30.2		29	0.041	K	VAAVEPVTMK	E	Oxidation (M)	0.0000000030.0	File838 Spectrum268494 scans: 10250	10416.4	12519.3	10474.8	10381.6	27838.1	40939.1	20085.2	29441.2	13.3466	13.6119	13.3546	13.3417	14.7648	15.3212	14.2938	14.8455	13.4137	-0.0671294	0.198161	-0.059067
583	Pavir.Cb00761.1	Pavir.Cb00761.1	1161	34961	55	55	5	5	25	319432	1	1	1	750.372	2248.09	3	2248.1	-0.0019	0	75.22	19	28	1.1e-06	R	QMGPPAAPGAHPENQEAAR	W	Oxidation (M)	0.0300000000000000000.0	File829 Spectrum49674 scans: 3700	9653.74	11422	10087.3	10910.3	39667.3	57022.3	26585.6	31717.1	13.2369	13.4795	13.3003	13.4134	15.2757	15.7992	14.6984	14.953	13.3575	-0.120642	0.122016	-0.0572595
583	Pavir.Cb00761.1	Pavir.Cb00761.1	1161	34961	55	55	5	5	25	176466	1	1	1	826.993	1651.97	2	1651.98	-0.007	0	47.07	23	29	0.0009	K	VAAVEPVTMK	E			File837 Spectrum247623 scans: 11759	9337.4	9572.44	12733.5	9701.35	44362.2	69325.6	33188.6	28521.8	13.1888	13.2247	13.6363	13.244	15.437	16.0811	15.0184	14.7998	13.3234	-0.134642	-0.0987762	0.312895
583	Pavir.Cb00761.1	Pavir.Cb00761.1	1161	34961	55	55	5	5	25	316818	1	1	1	745.041	2232.1	3	2232.1	-0.0007	0	56.85	17	28	8e-05	R	QMGPPAAPGAHPENQEAAR	W			File833 Spectrum146042 scans: 5264	9114.24	11170.6	8393.78	9829.84	67472.1	92441.9	53712.2	45058.7	13.1539	13.4474	13.0351	13.263	16.042	16.4963	15.713	15.4595	13.2248	-0.0709398	0.222577	-0.189743
583	Pavir.Cb00761.1	Pavir.Cb00761.1	1161	34961	55	55	5	5	25	182153	1	1	1	556.999	1667.97	3	1667.97	0.0005	0	31.17	16	29	0.033	K	VAAVEPVTMK	E	Oxidation (M)	0.0000000030.0	File838 Spectrum268403 scans: 10153	8932.52	14769.2	11362	11977.5	26953.9	35497.2	19739.2	26828.9	13.1249	13.8503	13.4719	13.548	14.7182	15.1154	14.2688	14.7115	13.4988	-0.373928	0.351523	-0.0268534
583	Pavir.Cb00761.1	Pavir.Cb00761.1	1161	34961	55	55	5	5	25	181926	1	1	1	834.926	1667.84	2	1667.84	-0.0039	0	48.63	16	27	0.0004	R	QTFSSGPDEQLR	K			File832 Spectrum125380 scans: 8443	8655.07	17563.9	12261.6	11912.8	32633.2	63243.8	33040.6	35394.4	13.0793	14.1003	13.5819	13.5402	14.9941	15.9486	15.012	15.1112	13.5754	-0.496103	0.52489	0.0064232
583	Pavir.Cb00761.1	Pavir.Cb00761.1	1161	34961	55	55	5	5	25	176483	1	1	1	826.995	1651.98	2	1651.98	-0.004	0	44.94	22	29	0.0015	K	VAAVEPVTMK	E			File837 Spectrum247578 scans: 11711	7839.85	11304.2	17596.1	11693.1	43487.6	69100.2	38399.7	31806.8	12.9366	13.4646	14.103	13.5134	15.4083	16.0764	15.2288	14.957	13.5044	-0.567769	-0.0398117	0.598589
583	Pavir.Cb00761.1	Pavir.Cb00761.1	1161	34961	55	55	5	5	25	176467	1	1	1	551.665	1651.97	3	1651.98	-0.0067	0	39.06	26	29	0.0057	K	VAAVEPVTMK	E			File837 Spectrum247658 scans: 11797	6939.78	11027.8	7124.65	18869.5	43582.3	67915.1	40037.5	35024.4	12.7607	13.4289	12.7986	14.2038	15.4115	16.0514	15.2891	15.0961	13.298	-0.5373	0.130879	-0.499371
583	Pavir.Cb00761.1	Pavir.Cb00761.1	1161	34961	55	55	5	5	25	319421	1	1	1	563.03	2248.09	4	2248.1	-0.0068	0	32.67		28	0.018	R	QMGPPAAPGAHPENQEAAR	W	Oxidation (M)	0.0300000000000000000.0	File829 Spectrum49735 scans: 3765	6332.77	11173.8	7722.83	7069.02	9921.41	11624.4	10522.3	9475.88	12.6286	13.4478	12.9149	12.7873	13.2763	13.5049	13.3612	13.21	12.9447	-0.316045	0.503169	-0.0297519
583	Pavir.Cb00761.1	Pavir.Cb00761.1	1161	34961	55	55	5	5	25	319429	1	1	1	563.031	2248.09	4	2248.1	-0.0022	0	33.77		28	0.015	R	QMGPPAAPGAHPENQEAAR	W	Oxidation (M)	0.0300000000000000000.0	File829 Spectrum49660 scans: 3685	5385.72	9385.27	3165.71	9821.52	30417.9	46924.6	19050.5	22647	12.3949	13.1962	11.6283	13.2617	14.8926	15.5181	14.2175	14.467	12.6203	-0.225364	0.575896	-0.991975
583	Pavir.Cb00761.1	Pavir.Cb00761.1	1161	34961	55	55	5	5	25	176476	1	1	1	551.665	1651.97	3	1651.98	-0.005	0	33.76	24	29	0.019	K	VAAVEPVTMK	E			File837 Spectrum247516 scans: 11645	4948.47	8144.02	8762.99	6714.36	21273.4	25385.3	13503.6	16402.3	12.2728	12.9915	13.0972	12.713	14.3768	14.6317	13.7211	14.0016	12.7686	-0.495867	0.222892	0.328574
583	Pavir.Cb00761.1	Pavir.Cb00761.1	1161	34961	55	55	5	5	25	182145	1	1	1	556.998	1667.97	3	1667.97	-0.0013	0	34.1	17	29	0.018	K	VAAVEPVTMK	E	Oxidation (M)	0.0000000030.0	File838 Spectrum268542 scans: 10301	4710.46	11331	5925.34	4894.77	9136.07	13940.5	6884.45	6699.94	12.2017	13.468	12.5327	12.257	13.1574	13.767	12.7491	12.7099	12.6148	-0.413184	0.853149	-0.0821545
583	Pavir.Cb00761.1	Pavir.Cb00761.1	1161	34961	55	55	5	5	25	176463	1	1	1	551.664	1651.97	3	1651.98	-0.0078	0	36.79	25	29	0.0094	K	VAAVEPVTMK	E			File837 Spectrum247704 scans: 11846	4579.26	5639.21	5416.84	7513.11	19114.5	21253.7	15832.2	16536.8	12.1609	12.4613	12.4032	12.8752	14.2224	14.3754	13.9506	14.0134	12.4752	-0.314252	-0.013874	-0.0719161
583	Pavir.Cb00761.1	Pavir.Cb00761.1	1161	34961	55	55	5	5	25	319430	1	1	1	750.372	2248.09	3	2248.1	-0.0021	0	68.78		28	4.6e-06	R	QMGPPAAPGAHPENQEAAR	W	Oxidation (M)	0.0300000000000000000.0	File829 Spectrum49739 scans: 3769	2970.1	3561.59	2812.67	5171.56	5341.55	6553.45	5110.58	4990.2	11.5363	11.7983	11.4577	12.3364	12.383	12.678	12.3193	12.2849	11.7822	-0.245881	0.0161271	-0.324452
583	Pavir.Cb00761.1	Pavir.Cb00761.1	1161	34961	55	55	5	5	25	316812	1	1	1	745.039	2232.09	3	2232.1	-0.0069	0	46.12		28	0.00091	R	QMGPPAAPGAHPENQEAAR	W			File834 Spectrum169755 scans: 5010	2680.16	1902.81	3194.71	2127.58	10610.8	12947.6	7199.89	6813.17	11.3881	10.8939	11.6415	11.055	13.3732	13.6604	12.8138	12.7341	11.2446	0.143481	-0.350708	0.396847
583	Pavir.Cb00761.1	Pavir.Cb00761.1	1161	34961	55	55	5	5	25	181928	1	1	1	834.927	1667.84	2	1667.84	-0.0033	0	40.84	16	27	0.0024	R	QTFSSGPDEQLR	K			File832 Spectrum125516 scans: 8588	2322.1	3669.8	3778.83	2847.67	6495.38	9434.61	5691.01	6875.96	11.1812	11.8415	11.8837	11.4756	12.6652	13.2037	12.4745	12.7473	11.5955	-0.414282	0.245987	0.288228
583	Pavir.Cb00761.1	Pavir.Cb00761.1	1161	34961	55	55	5	5	25	316813	1	1	1	745.039	2232.1	3	2232.1	-0.0051	0	67.21		28	7.1e-06	R	QMGPPAAPGAHPENQEAAR	W			File833 Spectrum146111 scans: 5338	2152.63	1445.96	2470.27	2636.1	10213.5	14783.1	8485.66	7680.94	11.0719	10.4978	11.2705	11.3642	13.3182	13.8517	13.0508	12.9071	11.0511	0.020802	-0.553278	0.21937
583	Pavir.Cb00761.1	Pavir.Cb00761.1	1161	34961	55	55	5	5	25	316822	1	1	1	745.042	2232.1	3	2232.1	0.0026	0	62.97	20	28	1.9e-05	R	QMGPPAAPGAHPENQEAAR	W			File833 Spectrum145968 scans: 5185	1964.86	5523.09	5692.64	3027.83	18032.8	24170.4	12634.1	10523	10.9402	12.4313	12.4749	11.5641	14.1383	14.561	13.625	13.3613	11.8526	-0.912397	0.578656	0.622279
583	Pavir.Cb00761.1	Pavir.Cb00761.1	1161	34961	55	55	5	5	25	316816	1	1	1	745.041	2232.1	3	2232.1	-0.0013	0	54.8		28	0.00012	R	QMGPPAAPGAHPENQEAAR	W			File833 Spectrum145955 scans: 5171	1870.05	3351.92	3425.14	2883.42	11713.6	16333.9	8102.31	7695.51	10.8689	11.7108	11.7419	11.4936	13.5159	13.9956	12.9841	12.9098	11.4538	-0.584927	0.256984	0.288163
583	Pavir.Cb00761.1	Pavir.Cb00761.1	1161	34961	55	55	5	5	25	303761	1	1	1	719.727	2156.16	3	2156.16	-0.0054	0	72.28	19	30	3.4e-06	R	SSSQQQGVAGTAAAGTK	-			File832 Spectrum121719 scans: 4538	1532.02	1225.22	1910.53	1070.42	1515.26	7083.7	2670.72	1666.02	10.5812	10.2588	10.8998	10.064	10.5654	12.7903	11.383	10.7022	10.4509	0.130277	-0.192115	0.448817
583	Pavir.Cb00761.1	Pavir.Cb00761.1	1161	34961	55	55	5	5	25	319435	1	1	1	563.031	2248.09	4	2248.1	-0.0012	0	40.12		28	0.0033	R	QMGPPAAPGAHPENQEAAR	W	Oxidation (M)	0.0300000000000000000.0	File833 Spectrum144548 scans: 3662	1311.19	1980.51	1802.94	1238.35	5340.36	7586.43	5733.45	4350.03	10.3567	10.9517	10.8161	10.2742	12.3827	12.8892	12.4852	12.0868	10.5997	-0.243006	0.351992	0.216473
583	Pavir.Cb00761.1	Pavir.Cb00761.1	1161	34961	55	55	5	5	25	319425	1	1	1	563.03	2248.09	4	2248.1	-0.0032	0	36.22	16	28	0.0085	R	QMGPPAAPGAHPENQEAAR	W	Oxidation (M)	0.0300000000000000000.0	File833 Spectrum144518 scans: 3624	1046.82	1524.33	486.877	789.899	1545.99	2559.84	1180.53	1562.87	10.0318	10.574	8.92741	9.62552	10.5943	11.3218	10.2052	10.61	9.78967	0.242125	0.784286	-0.862262
583	Pavir.Cb00761.1	Pavir.Cb00761.1	1161	34961	55	55	5	5	25	319436	1	1	1	750.373	2248.1	3	2248.1	-0.0001	0	79.4		28	4.1e-07	R	QMGPPAAPGAHPENQEAAR	W	Oxidation (M)	0.0300000000000000000.0	File829 Spectrum49626 scans: 3648	675.581	1095.44	715.521	633.346	3066.06	4885.9	1836.91	2118.96	9.39998	10.0973	9.48285	9.30685	11.5822	12.2544	10.8431	11.0491	9.57175	-0.171761	0.525553	-0.0888951
583	Pavir.Cb00761.1	Pavir.Cb00761.1	1161	34961	55	55	5	5	25	319434	1	1	1	750.372	2248.09	3	2248.1	-0.0012	0	67.7		28	5.8e-06	R	QMGPPAAPGAHPENQEAAR	W	Oxidation (M)	0.0300000000000000000.0	File833 Spectrum144574 scans: 3692	667.136	677.236	1125.77	721.806	3258.99	4626.69	2491.89	2255.74	9.38184	9.40352	10.1367	9.49547	11.6702	12.1758	11.283	11.1394	9.60438	-0.222542	-0.200865	0.532321
583	Pavir.Cb00761.1	Pavir.Cb00761.1	1161	34961	55	55	5	5	25	319597	1	1	1	750.701	2249.08	3	2249.08	0.0014	0	30.09		27	0.03	R	QMGPPAAPGAHPENQEAAR	W	Deamidated (NQ); Oxidation (M)	0.0300000000000100000.0	File828 Spectrum25478 scans: 3991	575.494	1118.38	772.095	682.494	2375.43	2816.53	1457.78	1607.72	9.16866	10.1272	9.59263	9.41467	11.214	11.4597	10.5096	10.6508	9.57579	-0.407132	0.551405	0.0168442
583	Pavir.Cb00761.1	Pavir.Cb00761.1	1161	34961	55	55	5	5	25	319422	1	1	1	750.371	2248.09	3	2248.1	-0.0056	0	77.99		28	5.4e-07	R	QMGPPAAPGAHPENQEAAR	W	Oxidation (M)	0.0300000000000000000.0	File833 Spectrum144523 scans: 3630	558.94	602.169	663.819	510.633	3107.54	4202.83	2207.03	2130.17	9.12655	9.23403	9.37465	8.99614	11.6016	12.0371	11.1079	11.0568	9.18284	-0.056292	0.0511852	0.191805
583	Pavir.Cb00761.1	Pavir.Cb00761.1	1161	34961	55	55	5	5	25	319596	1	1	1	750.701	2249.08	3	2249.08	0.0006	0	59.16		27	3.8e-05	R	QMGPPAAPGAHPENQEAAR	W	Deamidated (NQ); Oxidation (M)	0.0300000000000100000.0	File828 Spectrum25320 scans: 3822	438.61	569.423	348.165	382.573	1386.05	1824.85	1084.65	972.253	8.77679	9.15336	8.44363	8.57959	10.4368	10.8336	10.083	9.92519	8.73834	0.0384514	0.415014	-0.294714
583	Pavir.Cb00761.1	Pavir.Cb00761.1	1161	34961	55	55	5	5	25	319423	1	1	1	750.371	2248.09	3	2248.1	-0.0049	0	52.82		28	0.00018	R	QMGPPAAPGAHPENQEAAR	W	Oxidation (M)	0.0300000000000000000.0	File830 Spectrum74100 scans: 3732	414.03	585.492	615.431	634.852	1094.91	1713.3	1237.99	931.556	8.69359	9.1935	9.26545	9.31028	10.0966	10.7426	10.2738	9.8635	9.11571	-0.422114	0.0777975	0.149747
583	Pavir.Cb00761.1	Pavir.Cb00761.1	1161	34961	55	55	5	5	25	319420	1	1	1	750.369	2248.09	3	2248.1	-0.0111	0	53.78		28	0.00013	R	QMGPPAAPGAHPENQEAAR	W	Oxidation (M)	0.0300000000000000000.0	File830 Spectrum74110 scans: 3743	348.739	380.287	461.944	754.149	1050.67	1606.01	1056.98	959.472	8.44601	8.57094	8.85157	9.55871	10.0371	10.6493	10.0457	9.9061	8.85681	-0.410802	-0.285864	-0.00523373
583	Pavir.Cb00761.1	Pavir.Cb00761.1	1161	34961	55	55	5	5	25	319438	1	1	1	750.373	2248.1	3	2248.1	0.0017	0	87.01	19	28	7e-08	R	QMGPPAAPGAHPENQEAAR	W	Oxidation (M)	0.0300000000000000000.0	File833 Spectrum144594 scans: 3716	297.308	367.203	383.978	365.872	1214.95	1606.61	732.448	746.119	8.21581	8.52043	8.58488	8.5152	10.2467	10.6498	9.51658	9.54326	8.45908	-0.243267	0.0613537	0.125798
583	Pavir.Cb00761.1	Pavir.Cb00761.1	1161	34961	55	55	5	5	25	319428	1	1	1	563.031	2248.09	4	2248.1	-0.0022	0	30.31	14	28	0.033	R	QMGPPAAPGAHPENQEAAR	W	Oxidation (M)	0.0300000000000000000.0	File834 Spectrum168604 scans: 3640	123.485	566.596	212.284	200.898	492.705	668.667	331.221	153.821	6.94819	9.14618	7.72985	7.65032	8.94458	9.38514	8.37165	7.2651	7.86863	-0.920446	1.27754	-0.13878
588	Pavir.Gb01699.1	Pavir.Gb01699.1	1158	118717	47	47	7	7	10.6	264346	1	1	1	985.979	1969.94	2	1969.95	-0.004	0	44.18		26	0.00088	R	SGAGDDYESGYNK	S			File827 Spectrum2553 scans: 5858	77956	71956.9	70427.3	69196.8	210071	276819	202205	203823	16.2504	16.1348	16.1038	16.0784	17.6805	18.0786	17.6255	17.637	16.1419	0.108502	-0.00702523	-0.0380233
588	Pavir.Gb01699.1	Pavir.Gb01699.1	1158	118717	47	47	7	7	10.6	207819	1	1	1	879.442	1756.87	2	1756.87	-0.0043	0	48.37		27	0.00042	R	SGTDDYGSGYK	K			File829 Spectrum51838 scans: 6008	37861.1	35734.8	22605.5	36326.2	72363	87919.5	53972.7	114917	15.2084	15.125	14.4644	15.1487	16.143	16.4239	15.7199	16.8102	14.9866	0.221782	0.138396	-0.522257
588	Pavir.Gb01699.1	Pavir.Gb01699.1	1158	118717	47	47	7	7	10.6	230251	1	1	1	614.31	1839.91	3	1839.92	-0.0122	0	33.38		27	0.014	K	SGTDGGYGGGYNK	S			File830 Spectrum75737 scans: 5479	28710.5	57361	37101.5	28626.4	55758.7	109512	55277.2	90094.9	14.8093	15.8078	15.1792	14.8051	15.7669	16.7407	15.7544	16.4592	15.1503	-0.341039	0.657453	0.0288601
588	Pavir.Gb01699.1	Pavir.Gb01699.1	1158	118717	47	47	7	7	10.6	308936	1	1	1	729.025	2184.05	3	2184.05	-0.0021	0	56.08		27	7.5e-05	K	SATDDYNSGGGGAYNK	S			File829 Spectrum51820 scans: 5989	22909.5	21985.2	25297	17509.9	60124.1	87935.4	58035.9	61023.7	14.4837	14.4242	14.6267	14.0959	15.8757	16.4242	15.8247	15.8971	14.4076	0.0760438	0.0166266	0.219064
588	Pavir.Gb01699.1	Pavir.Gb01699.1	1158	118717	47	47	7	7	10.6	207820	1	1	1	879.443	1756.87	2	1756.87	-0.002	0	66.12	18	27	7.1e-06	R	SGTDDYGSGYK	K			File829 Spectrum51861 scans: 6032	19233.5	18285.5	12291	18917.2	40887.3	48464	28715.3	56987.6	14.2313	14.1584	13.5853	14.2074	15.3194	15.5646	14.8095	15.7984	14.0456	0.185716	0.112795	-0.460301
588	Pavir.Gb01699.1	Pavir.Gb01699.1	1158	118717	47	47	7	7	10.6	309093	1	1	1	729.356	2185.05	3	2185.04	0.0067	0	56.63		27	5.6e-05	K	SATDDYNSGGGGAYNK	S	Deamidated (NQ)	0.0000001000000000.0	File829 Spectrum51859 scans: 6030	17306.7	19275.5	26058.4	13552.6	41973	43805.8	39868.4	39822.9	14.079	14.2345	14.6695	13.7263	15.3572	15.4188	15.283	15.2813	14.1773	-0.0982758	0.0571636	0.492143
588	Pavir.Gb01699.1	Pavir.Gb01699.1	1158	118717	47	47	7	7	10.6	230256	1	1	1	614.312	1839.92	3	1839.92	-0.0056	0	46.83	16	28	0.00068	K	SGTDGGYGGGYNK	S			File831 Spectrum99114 scans: 5414	16574.3	35632.8	25878.1	14832.2	48660	113078	52530.8	71394.3	14.0167	15.1209	14.6594	13.8564	15.5704	16.787	15.6809	16.1235	14.4134	-0.396709	0.707552	0.246077
588	Pavir.Gb01699.1	Pavir.Gb01699.1	1158	118717	47	47	7	7	10.6	250184	1	1	1	639.318	1914.93	3	1914.94	-0.0097	0	41.53		27	0.0019	K	SSTDDYGSAGGYK	K			File829 Spectrum52414 scans: 6622	14913.3	33252.9	10723.7	20884	21211.2	10433.3	16501.5	15718.4	13.8643	15.0212	13.3885	14.3501	14.3725	13.3489	14.0103	13.9402	14.156	-0.291725	0.86516	-0.767511
588	Pavir.Gb01699.1	Pavir.Gb01699.1	1158	118717	47	47	7	7	10.6	264341	1	1	1	985.978	1969.94	2	1969.95	-0.006	0	58.59		26	3e-05	R	SGAGDDYESGYNK	S			File827 Spectrum2679 scans: 5992	12789	11847.9	13593.5	8468.64	30714.3	38275	28597.4	32894.3	13.6426	13.5323	13.7306	13.0479	14.9066	15.2241	14.8036	15.0055	13.4884	0.154237	0.0439663	0.242258
588	Pavir.Gb01699.1	Pavir.Gb01699.1	1158	118717	47	47	7	7	10.6	230252	1	1	1	614.312	1839.91	3	1839.92	-0.0087	0	40.06		28	0.0032	K	SGTDGGYGGGYNK	S			File831 Spectrum99085 scans: 5383	12621.8	34328.5	21053.3	17550.5	37003.5	65967.6	35949.8	55956.1	13.6236	15.0671	14.3618	14.0992	15.1754	16.0095	15.1337	15.772	14.2879	-0.664306	0.779187	0.0738259
588	Pavir.Gb01699.1	Pavir.Gb01699.1	1158	118717	47	47	7	7	10.6	207818	1	1	1	586.63	1756.87	3	1756.87	-0.0051	0	54.42	16	27	0.0001	R	SGTDDYGSGYK	K			File829 Spectrum51899 scans: 6073	12001.7	13760.5	9792.09	10344.4	20025.5	18106.2	17943.7	22579.8	13.551	13.7482	13.2574	13.3366	14.2895	14.1442	14.1312	14.4627	13.4733	0.0776658	0.274957	-0.21589
588	Pavir.Gb01699.1	Pavir.Gb01699.1	1158	118717	47	47	7	7	10.6	309084	1	1	1	1093.53	2185.04	2	2185.04	-0.003	0	58.06		26	3.6e-05	K	SATDDYNSGGGGAYNK	S	Deamidated (NQ)	0.0000001000000000.0	File828 Spectrum27362 scans: 6001	10781.5	9779.44	10554.1	9628.55	31127.1	39447.9	28210.7	28600.3	13.3963	13.2555	13.3655	13.2331	14.9259	15.2677	14.784	14.8037	13.3126	0.0836627	-0.0570709	0.0529131
588	Pavir.Gb01699.1	Pavir.Gb01699.1	1158	118717	47	47	7	7	10.6	309075	1	1	1	729.351	2185.03	3	2185.04	-0.0074	0	48.16		26	0.00033	K	SATDDYNSGGGGAYNK	S	Deamidated (NQ)	0.0000001000000000.0	File828 Spectrum27289 scans: 5923	10685.3	14073.3	14206.9	10277.1	24053.4	35658.4	24453.2	25685.3	13.3833	13.7807	13.7943	13.3271	14.554	15.122	14.5777	14.6487	13.5714	-0.188028	0.209312	0.222937
588	Pavir.Gb01699.1	Pavir.Gb01699.1	1158	118717	47	47	7	7	10.6	309089	1	1	1	729.353	2185.04	3	2185.04	-0.0008	0	46.63		26	0.00051	K	SATDDYNSGGGGAYNK	S	Deamidated (NQ)	0.0000001000000000.0	File827 Spectrum2511 scans: 5813	9685.61	11657.6	9705.33	12182	18325.2	19588.7	19578.8	17467.4	13.2416	13.509	13.2446	13.5725	14.1615	14.2577	14.257	14.0924	13.3919	-0.15028	0.11707	-0.147346
588	Pavir.Gb01699.1	Pavir.Gb01699.1	1158	118717	47	47	7	7	10.6	309090	1	1	1	729.354	2185.04	3	2185.04	0.0021	0	77.33		26	4.4e-07	K	SATDDYNSGGGGAYNK	S	Deamidated (NQ)	0.0000001000000000.0	File827 Spectrum2795 scans: 6116	9656.4	12192.8	7746.15	8205.79	25359.6	33179.5	24567.9	22064.1	13.2373	13.5737	12.9193	13.0024	14.6302	15.018	14.5845	14.4294	13.1832	0.0540936	0.390568	-0.263912
588	Pavir.Gb01699.1	Pavir.Gb01699.1	1158	118717	47	47	7	7	10.6	250185	1	1	1	639.318	1914.93	3	1914.94	-0.0083	0	31.39		27	0.02	K	SSTDDYGSAGGYK	K			File829 Spectrum52488 scans: 6701	9332.33	13556.3	6165.21	9901.36	10307.8	3920.74	6103.58	10276.4	13.188	13.7267	12.5899	13.2734	13.3314	11.9369	12.5754	13.327	13.1945	-0.00648875	0.532163	-0.604575
588	Pavir.Gb01699.1	Pavir.Gb01699.1	1158	118717	47	47	7	7	10.6	264344	1	1	1	657.655	1969.94	3	1969.95	-0.005	0	47.84		26	0.00037	R	SGAGDDYESGYNK	S			File827 Spectrum2721 scans: 6037	8962.82	10192.5	8787.75	7488.92	18304.1	18871	17772.7	15000.9	13.1297	13.3152	13.1013	12.8705	14.1599	14.2039	14.1174	13.8728	13.1042	0.0255434	0.211023	-0.002915
588	Pavir.Gb01699.1	Pavir.Gb01699.1	1158	118717	47	47	7	7	10.6	309068	1	1	1	729.35	2185.03	3	2185.04	-0.0115	0	86.95		26	4.1e-08	K	SATDDYNSGGGGAYNK	S	Deamidated (NQ)	0.0000001000000000.0	File828 Spectrum27731 scans: 6394	8389.05	11596.7	8722.23	8296.45	18285	26565.5	21073.1	21312.9	13.0343	13.5014	13.0905	13.0183	14.1584	14.6973	14.3631	14.3794	13.1611	-0.126826	0.340304	-0.0706369
588	Pavir.Gb01699.1	Pavir.Gb01699.1	1158	118717	47	47	7	7	10.6	264345	1	1	1	657.655	1969.94	3	1969.95	-0.0044	0	60.76		26	1.9e-05	R	SGAGDDYESGYNK	S			File828 Spectrum27585 scans: 6239	7864.47	10959.9	8354.62	6434.57	17282.6	22708.5	19602.1	17994.3	12.9411	13.42	13.0284	12.6516	14.077	14.4709	14.2587	14.1353	13.0103	-0.0691342	0.409684	0.0180907
588	Pavir.Gb01699.1	Pavir.Gb01699.1	1158	118717	47	47	7	7	10.6	264342	1	1	1	657.655	1969.94	3	1969.95	-0.0059	0	52.76	16	26	0.00012	R	SGAGDDYESGYNK	S			File828 Spectrum27651 scans: 6309	7746.6	9037.13	7097.7	5462.7	13352.1	19901.7	16478.6	14888.8	12.9193	13.1416	12.7931	12.4154	13.7048	14.2806	14.0083	13.8619	12.8174	0.101965	0.324266	-0.0242471
588	Pavir.Gb01699.1	Pavir.Gb01699.1	1158	118717	47	47	7	7	10.6	309086	1	1	1	729.353	2185.04	3	2185.04	-0.0018	0	60.08		26	2.3e-05	K	SATDDYNSGGGGAYNK	S	Deamidated (NQ)	0.0000001000000000.0	File828 Spectrum27451 scans: 6096	6941.64	5948.68	6805.49	5549.27	14924.2	14919.9	10296.4	12276.5	12.7611	12.5384	12.7325	12.4381	13.8654	13.865	13.3298	13.5836	12.6175	0.143565	-0.0791414	0.114988
588	Pavir.Gb01699.1	Pavir.Gb01699.1	1158	118717	47	47	7	7	10.6	309091	1	1	1	729.354	2185.04	3	2185.04	0.0023	0	50.83	18	26	0.0002	K	SATDDYNSGGGGAYNK	S	Deamidated (NQ)	0.0000000000000010.0	File827 Spectrum2667 scans: 5979	6542.05	9905.64	6394.95	7080.68	13005.8	17456.8	13223.3	14115.2	12.6755	13.274	12.6427	12.7897	13.6669	14.0915	13.6908	13.785	12.8455	-0.169962	0.428546	-0.202769
588	Pavir.Gb01699.1	Pavir.Gb01699.1	1158	118717	47	47	7	7	10.6	309085	1	1	1	729.352	2185.04	3	2185.04	-0.0029	0	40.4	17	26	0.0021	K	SATDDYNSGGGGAYNK	S	Deamidated (NQ)	0.0000000000000010.0	File827 Spectrum2685 scans: 5998	5863.95	6624.25	5298.92	5383.69	10660.8	13581.2	11892.4	13375.2	12.5177	12.6935	12.3715	12.3944	13.38	13.7293	13.5378	13.7073	12.4943	0.0233926	0.199276	-0.122784
588	Pavir.Gb01699.1	Pavir.Gb01699.1	1158	118717	47	47	7	7	10.6	264340	1	1	1	657.654	1969.94	3	1969.95	-0.0064	0	54.11		26	8.6e-05	R	SGAGDDYESGYNK	S			File827 Spectrum2471 scans: 5770	5748.56	9726.26	5814.38	6459.88	11084.7	11380.8	9393.99	10282	12.489	13.2477	12.5054	12.6573	13.4363	13.4743	13.1975	13.3278	12.7248	-0.235855	0.522831	-0.21943
588	Pavir.Gb01699.1	Pavir.Gb01699.1	1158	118717	47	47	7	7	10.6	272135	1	1	1	668.981	2003.92	3	2003.92	-0.0031	0	42.75		24	0.00072	R	SGGDGYNRPGTDEYGR	G			File827 Spectrum905 scans: 4100	5326.56	16388.6	6885.92	7411.44	12588.4	14445	10921.8	15752	12.379	14.0004	12.7494	12.8555	13.6198	13.8183	13.4149	13.9433	12.9961	-0.617102	1.00431	-0.246657
588	Pavir.Gb01699.1	Pavir.Gb01699.1	1158	118717	47	47	7	7	10.6	309230	1	1	1	729.679	2186.02	3	2186.02	-0.0062	0	58.3		25	2.8e-05	K	SATDDYNSGGGGAYNK	S	2 Deamidated (NQ)	0.0000001000000010.0	File846 Spectrum450065 scans: 6115	4916.47	8950.99	4863.87	4666.07	9652.59	12462.3	10508.6	10538.7	12.2634	13.1278	12.2479	12.188	13.2367	13.6053	13.3593	13.3634	12.4568	-0.193373	0.671052	-0.208891
588	Pavir.Gb01699.1	Pavir.Gb01699.1	1158	118717	47	47	7	7	10.6	309079	1	1	1	729.352	2185.03	3	2185.04	-0.0049	0	63.09		26	1.1e-05	K	SATDDYNSGGGGAYNK	S	Deamidated (NQ)	0.0000001000000000.0	File829 Spectrum52305 scans: 6506	4691.12	11216.7	5747.36	7566.35	13644.7	13932	12464.2	13050.1	12.1957	13.4534	12.4887	12.8854	13.7361	13.7661	13.6055	13.6718	12.7558	-0.560067	0.697571	-0.267102
588	Pavir.Gb01699.1	Pavir.Gb01699.1	1158	118717	47	47	7	7	10.6	309082	1	1	1	1093.52	2185.03	2	2185.04	-0.0039	0	50.36		26	0.00021	K	SATDDYNSGGGGAYNK	S	Deamidated (NQ)	0.0000001000000000.0	File828 Spectrum27415 scans: 6057	4462.9	3263.23	3846.47	3258.52	12121.6	12653.9	11434.3	11100.4	12.1238	11.6721	11.9093	11.67	13.5653	13.6273	13.4811	13.4383	11.8438	0.279972	-0.171708	0.0655269
588	Pavir.Gb01699.1	Pavir.Gb01699.1	1158	118717	47	47	7	7	10.6	314221	1	1	1	739.683	2216.03	3	2216.03	-0.0061	0	52.79		25	9.4e-05	K	TSGDDEYTGGGGYDSK	S			File845 Spectrum426154 scans: 6250	4146.48	5052.86	3841.07	3189.18	7804	8689.63	11536.8	9551	12.0177	12.3029	11.9073	11.639	12.93	13.0851	13.494	13.2214	11.9667	0.0509665	0.336179	-0.0594117
588	Pavir.Gb01699.1	Pavir.Gb01699.1	1158	118717	47	47	7	7	10.6	309087	1	1	1	729.353	2185.04	3	2185.04	-0.0018	0	37.47		26	0.0041	K	SATDDYNSGGGGAYNK	S	Deamidated (NQ)	0.0000001000000000.0	File829 Spectrum52382 scans: 6588	3970.83	8061.87	3144.29	4497.39	9255.37	7994.12	7515.82	8623.82	11.9552	12.9769	11.6185	12.1349	13.1761	12.9647	12.8757	13.0741	12.1714	-0.216154	0.805521	-0.552861
588	Pavir.Gb01699.1	Pavir.Gb01699.1	1158	118717	47	47	7	7	10.6	309229	1	1	1	729.679	2186.02	3	2186.02	-0.0069	0	59.77		25	1.9e-05	K	SATDDYNSGGGGAYNK	S	2 Deamidated (NQ)	0.0000001000000010.0	File846 Spectrum450045 scans: 6093	3892.95	5654.41	4096.25	3630.54	10404.3	13272	11354	10353.7	11.9266	12.4652	12.0001	11.826	13.3449	13.6961	13.4709	13.3379	12.0545	-0.127817	0.410694	-0.054377
588	Pavir.Gb01699.1	Pavir.Gb01699.1	1158	118717	47	47	7	7	10.6	264548	1	1	1	657.981	1970.92	3	1970.93	-0.0112	0	36.78		25	0.0036	R	SGAGDDYESGYNK	S	Deamidated (NQ)	0.0000000000010.0	File845 Spectrum425873 scans: 5950	3795.59	4381.88	3374.34	3344.37	5953.87	6503.45	6187.41	6305.3	11.8901	12.0973	11.7204	11.7075	12.5396	12.667	12.5951	12.6223	11.8538	0.0362693	0.243497	-0.133448
588	Pavir.Gb01699.1	Pavir.Gb01699.1	1158	118717	47	47	7	7	10.6	309232	1	1	1	729.681	2186.02	3	2186.02	-0.0014	0	32.07		25	0.012	K	SATDDYNSGGGGAYNK	S	2 Deamidated (NQ)	0.0000001000000010.0	File846 Spectrum449798 scans: 5830	3660.97	3365.48	2383.36	4196.33	4458.36	5582.99	5221.91	4974.5	11.838	11.7166	11.2188	12.0349	12.1223	12.4468	12.3504	12.2803	11.7021	0.135936	0.014519	-0.483292
588	Pavir.Gb01699.1	Pavir.Gb01699.1	1158	118717	47	47	7	7	10.6	264347	1	1	1	657.656	1969.94	3	1969.95	-0.0029	0	34.04		26	0.009	R	SGAGDDYESGYNK	S			File827 Spectrum2745 scans: 6062	3475.41	5714.63	4160.9	3387.22	5232.46	7484.94	5828.78	7343.47	11.763	12.4804	12.0227	11.7259	12.3533	12.8698	12.509	12.8422	11.998	-0.235026	0.482449	0.0246857
588	Pavir.Gb01699.1	Pavir.Gb01699.1	1158	118717	47	47	7	7	10.6	264554	1	1	1	657.983	1970.93	3	1970.93	-0.0042	0	50.09		25	0.00019	R	SGAGDDYESGYNK	S	Deamidated (NQ)	0.0000000000010.0	File845 Spectrum426004 scans: 6090	3442.7	4886.12	3283.29	2791.6	5111.86	6512.73	5331.31	5915.14	11.7493	12.2545	11.6809	11.4469	12.3196	12.669	12.3803	12.5302	11.7829	-0.0335752	0.471574	-0.101975
588	Pavir.Gb01699.1	Pavir.Gb01699.1	1158	118717	47	47	7	7	10.6	309231	1	1	1	729.68	2186.02	3	2186.02	-0.003	0	40.42		25	0.0017	K	SATDDYNSGGGGAYNK	S	2 Deamidated (NQ)	0.0000001000000010.0	File846 Spectrum449722 scans: 5749	3351.16	6375.92	4046.42	3188.49	5971.8	6886.53	7226.32	6584.46	11.7104	12.6384	11.9824	11.6387	12.544	12.7496	12.819	12.6848	11.9925	-0.282043	0.64593	-0.0100575
588	Pavir.Gb01699.1	Pavir.Gb01699.1	1158	118717	47	47	7	7	10.6	272132	1	1	1	668.98	2003.92	3	2003.92	-0.0052	0	34.08		24	0.0052	R	SGGDGYNRPGTDEYGR	G			File827 Spectrum951 scans: 4149	3285.22	11649.2	5131.07	4734	9191.87	11051.6	7099.19	12130.7	11.6818	13.5079	12.325	12.2088	13.1661	13.432	12.7934	13.5664	12.4309	-0.749127	1.07704	-0.10586
588	Pavir.Gb01699.1	Pavir.Gb01699.1	1158	118717	47	47	7	7	10.6	309081	1	1	1	729.352	2185.03	3	2185.04	-0.0043	0	37.53	19	26	0.004	K	SATDDYNSGGGGAYNK	S	Deamidated (NQ)	0.0000000000000010.0	File827 Spectrum2698 scans: 6012	3262.23	3526.09	4283.63	2958.59	7163.28	9159.93	6139.89	6726.85	11.6716	11.7839	12.0646	11.5307	12.8064	13.1611	12.584	12.7157	11.7627	-0.0910614	0.0211518	0.301917
588	Pavir.Gb01699.1	Pavir.Gb01699.1	1158	118717	47	47	7	7	10.6	309080	1	1	1	729.352	2185.03	3	2185.04	-0.0043	0	48.91		26	0.00029	K	SATDDYNSGGGGAYNK	S	Deamidated (NQ)	0.0000001000000000.0	File828 Spectrum27470 scans: 6116	3207.97	6219.58	3440.17	2505.13	6267.13	6274.33	5144.46	6634.91	11.6474	12.6026	11.7483	11.2907	12.6136	12.6152	12.3288	12.6959	11.8222	-0.1748	0.780357	-0.0739798
588	Pavir.Gb01699.1	Pavir.Gb01699.1	1158	118717	47	47	7	7	10.6	314227	1	1	1	739.685	2216.03	3	2216.03	-0.0012	0	63.45		25	8.5e-06	K	TSGDDEYTGGGGYDSK	S			File846 Spectrum450123 scans: 6177	3059.91	5522.25	1550.43	2196.8	10775.1	37163.2	11149.3	4993.56	11.5793	12.431	10.5985	11.1012	13.3954	15.1816	13.4447	12.2859	11.4275	0.151784	1.00355	-0.829037
588	Pavir.Gb01699.1	Pavir.Gb01699.1	1158	118717	47	47	7	7	10.6	309088	1	1	1	729.353	2185.04	3	2185.04	-0.0008	0	45.52		26	0.00066	K	SATDDYNSGGGGAYNK	S	Deamidated (NQ)	0.0000001000000000.0	File828 Spectrum27858 scans: 6530	2611.43	5292.45	2720.74	2718.16	5800.88	6128.87	6750.44	6180.85	11.3506	12.3697	11.4098	11.4084	12.5021	12.5814	12.7208	12.5936	11.6346	-0.284014	0.735085	-0.224853
588	Pavir.Gb01699.1	Pavir.Gb01699.1	1158	118717	47	47	7	7	10.6	309077	1	1	1	729.351	2185.03	3	2185.04	-0.0067	0	36.57	18	26	0.0049	K	SATDDYNSGGGGAYNK	S	Deamidated (NQ)	0.0000000000000010.0	File827 Spectrum2714 scans: 6029	2550.6	3893.3	2250.41	4824.82	4983.7	4929.15	4671.82	5836.66	11.3166	11.9268	11.136	12.2363	12.283	12.2671	12.1898	12.5109	11.6539	-0.337288	0.272869	-0.517934
588	Pavir.Gb01699.1	Pavir.Gb01699.1	1158	118717	47	47	7	7	10.6	314226	1	1	1	739.684	2216.03	3	2216.03	-0.0025	0	55.71	18	25	5.1e-05	K	TSGDDEYTGGGGYDSK	S			File846 Spectrum450097 scans: 6149	2227.11	3468.82	1364.94	2363.64	5808.04	19121.5	6140.05	3101.08	11.121	11.7602	10.4146	11.2068	12.5038	14.2229	12.584	11.5986	11.1257	-0.00469088	0.634577	-0.71103
588	Pavir.Gb01699.1	Pavir.Gb01699.1	1158	118717	47	47	7	7	10.6	264553	1	1	1	657.983	1970.93	3	1970.93	-0.0044	0	28.69		25	0.025	R	SGAGDDYESGYNK	S	Deamidated (NQ)	0.0000000000010.0	File845 Spectrum426080 scans: 6171	2125.69	3823.96	2061.44	1980.37	3381.69	3378.7	3848.94	3990.14	11.0537	11.9008	11.0094	10.9516	11.7235	11.7223	11.9102	11.9622	11.2289	-0.175174	0.671962	-0.219453
588	Pavir.Gb01699.1	Pavir.Gb01699.1	1158	118717	47	47	7	7	10.6	314223	1	1	1	739.683	2216.03	3	2216.03	-0.0045	0	25.26		25	0.054	K	TSGDDEYTGGGGYDSK	S			File845 Spectrum425814 scans: 5887	1802.02	1595.28	1895.23	1528.79	3122.33	3658.53	2272.55	2825.28	10.8154	10.6396	10.8882	10.5782	11.6084	11.837	11.1501	11.4642	10.7303	0.0850683	-0.0907395	0.157825
588	Pavir.Gb01699.1	Pavir.Gb01699.1	1158	118717	47	47	7	7	10.6	314219	1	1	1	739.682	2216.02	3	2216.03	-0.0089	0	33.51	15	25	0.0077	K	TSGDDEYTGGGGYDSK	S			File845 Spectrum426179 scans: 6276	919.387	1488.4	1278.11	998.746	2504.74	2448.36	2220.93	2253.49	9.84453	10.5395	10.3198	9.96397	11.2904	11.2576	11.1169	11.1379	10.167	-0.322432	0.372583	0.152834
588	Pavir.Gb01699.1	Pavir.Gb01699.1	1158	118717	47	47	7	7	10.6	272136	1	1	1	668.981	2003.92	3	2003.92	-0.0029	0	29.93		24	0.014	R	SGGDGYNRPGTDEYGR	G			File834 Spectrum168854 scans: 4037	327.108	3369.12	1349.42	1538.1	724.902	1081.72	582.328	2611.14	8.35362	11.7182	10.3981	10.5869	9.50164	10.0791	9.18569	11.3505	10.2642	-1.91059	1.45395	0.133914
596	Pavir.Fa02123.1	Pavir.Fa02123.1	1145	41015	66	66	12	12	45.5	244895	1	1	1	632.046	1893.12	3	1893.12	-0.0032	0	37.78		29	0.0079	K	VVLVDHTDFLK	E			File844 Spectrum412284 scans: 16741	56940.1	44608.9	47913.3	34517.1	82142.9	89471.7	50845.4	46247.1	15.7972	15.445	15.5481	15.075	16.3258	16.4491	15.6338	15.4971	15.4663	0.330815	-0.0212981	0.0817988
596	Pavir.Fa02123.1	Pavir.Fa02123.1	1145	41015	66	66	12	12	45.5	244894	1	1	1	632.046	1893.12	3	1893.12	-0.0034	0	44.83		29	0.0016	K	VVLVDHTDFLK	E			File844 Spectrum412384 scans: 16848	21292.8	16441.5	18425.4	19803.9	35104.6	40168.5	24642.4	23106.7	14.3781	14.0051	14.1694	14.2735	15.0994	15.2938	14.5889	14.496	14.2065	0.171572	-0.201454	-0.0371039
602	Pavir.Ib00061.1	Pavir.Ib00061.1	1132	29081	35	35	6	6	43.3	300333	1	1	1	713.057	2136.15	3	2136.16	-0.0065	0	46.66	16	30	0.0012	K	SPTSETYVIFGEAK	I			File837 Spectrum251947 scans: 16372	200131	165432	181512	125936	62592.8	95555.4	213540	66887.3	17.6106	17.3359	17.4697	16.9423	15.9337	16.544	17.7041	16.0294	17.3396	0.270962	-0.00374831	0.130081
602	Pavir.Ib00061.1	Pavir.Ib00061.1	1132	29081	35	35	6	6	43.3	206958	1	1	1	877.967	1753.92	2	1753.92	0.0001	0	39.2		29	0.0048	R	DIDLVMTQASVSR	A	Oxidation (M)	0.0000030000000.0	File838 Spectrum270665 scans: 12566	187394	129746	202497	133164	88675.6	122110	118456	100308	17.5157	16.9853	17.6275	17.0228	16.4362	16.8978	16.854	16.6141	17.2879	0.227858	-0.302528	0.339685
602	Pavir.Ib00061.1	Pavir.Ib00061.1	1132	29081	35	35	6	6	43.3	237542	1	1	1	622.684	1865.03	3	1865.04	-0.0053	0	44.93	21	29	0.0016	M	VSEQAPAAEVEK	T			File829 Spectrum53890 scans: 8197	132834	85580.5	111164	53119.8	15610.4	40612.6	77567.2	30349.3	17.0193	16.385	16.7623	15.697	13.9302	15.3096	16.2432	14.8894	16.4659	0.553379	-0.0808925	0.296439
602	Pavir.Ib00061.1	Pavir.Ib00061.1	1132	29081	35	35	6	6	43.3	206979	1	1	1	877.967	1753.92	2	1753.92	0.0018	0	28.42		28	0.056	R	DIDLVMTQASVSR	A	Oxidation (M)	0.0000030000000.0	File838 Spectrum270695 scans: 12598	132452	98383.1	123300	82581	55203.6	74895.2	79528.1	71786.7	17.0151	16.5861	16.9118	16.3335	15.7525	16.1926	16.2792	16.1314	16.7116	0.303466	-0.125519	0.200172
602	Pavir.Ib00061.1	Pavir.Ib00061.1	1132	29081	35	35	6	6	43.3	206926	1	1	1	877.965	1753.92	2	1753.92	-0.0035	0	50.99	16	28	0.00031	R	DIDLVMTQASVSR	A	Oxidation (M)	0.0000030000000.0	File841 Spectrum337359 scans: 11505	105803	81692.3	99260.3	67109.2	28451.4	52552.5	88177	43096.7	16.691	16.3179	16.5989	16.0342	14.7962	15.6815	16.4281	15.3953	16.4105	0.280504	-0.0926102	0.188406
602	Pavir.Ib00061.1	Pavir.Ib00061.1	1132	29081	35	35	6	6	43.3	206928	1	1	1	877.965	1753.92	2	1753.92	-0.0032	0	43.26	16	28	0.0018	R	DIDLVMTQASVSR	A	Oxidation (M)	0.0000030000000.0	File841 Spectrum337316 scans: 11459	58899.6	59822.6	75868.9	50612.2	24551.4	35536	53112.6	32188	15.846	15.8684	16.2112	15.6272	14.5835	15.117	15.6968	14.9742	15.8882	-0.0422286	-0.0197945	0.323023
602	Pavir.Ib00061.1	Pavir.Ib00061.1	1132	29081	35	35	6	6	43.3	300334	1	1	1	1069.08	2136.15	2	2136.16	-0.0059	0	45.52	20	30	0.0015	K	SPTSETYVIFGEAK	I			File837 Spectrum251972 scans: 16398	50705.9	36419.1	48044.3	28530.2	13101.4	19723.2	36128.1	16682.6	15.6299	15.1524	15.5521	14.8002	13.6774	14.2676	15.1408	14.0261	15.2836	0.346226	-0.13123	0.268441
602	Pavir.Ib00061.1	Pavir.Ib00061.1	1132	29081	35	35	6	6	43.3	202572	1	1	1	869.968	1737.92	2	1737.92	-0.0013	0	56.93	24	29	8.5e-05	R	DIDLVMTQASVSR	A			File841 Spectrum342238 scans: 16709	49481	44137.2	56949.7	34454.7	20667.8	31538.6	44159.9	26324.4	15.5946	15.4297	15.7974	15.0724	14.3351	14.9448	15.4304	14.6841	15.4735	0.12106	-0.0438207	0.323874
602	Pavir.Ib00061.1	Pavir.Ib00061.1	1132	29081	35	35	6	6	43.3	300330	1	1	1	1069.08	2136.15	2	2136.16	-0.0079	0	63.58		30	2.4e-05	K	SPTSETYVIFGEAK	I			File837 Spectrum251959 scans: 16384	45302.8	35736.6	46975.8	29797.4	11343.9	21891.8	34352.7	16009.9	15.4673	15.1251	15.5196	14.8629	13.4696	14.4181	15.0681	13.9667	15.2437	0.223571	-0.118624	0.275891
602	Pavir.Ib00061.1	Pavir.Ib00061.1	1132	29081	35	35	6	6	43.3	206929	1	1	1	877.965	1753.92	2	1753.92	-0.0031	0	42.15	17	28	0.0023	R	DIDLVMTQASVSR	A	Oxidation (M)	0.0000030000000.0	File841 Spectrum337454 scans: 11606	41183.5	34502.5	44567.4	26812.4	14956.4	20485.6	34272.5	15281.2	15.3298	15.0744	15.4437	14.7106	13.8685	14.3223	15.0648	13.8995	15.1396	0.190152	-0.0652119	0.304075
602	Pavir.Ib00061.1	Pavir.Ib00061.1	1132	29081	35	35	6	6	43.3	202579	1	1	1	869.969	1737.92	2	1737.92	-0.0008	0	46.16	23	29	0.001	R	DIDLVMTQASVSR	A			File841 Spectrum342146 scans: 16611	41063.4	45279.7	44090.8	35644.8	16368.9	26136.5	42164.4	24115.7	15.3256	15.4666	15.4282	15.1214	13.9987	14.6738	15.3637	14.5577	15.3354	-0.00986959	0.131141	0.0927571
602	Pavir.Ib00061.1	Pavir.Ib00061.1	1132	29081	35	35	6	6	43.3	237544	1	1	1	933.524	1865.03	2	1865.04	-0.0027	0	49.75	20	30	0.00054	M	VSEQAPAAEVEK	T			File829 Spectrum53918 scans: 8226	40857.9	29038	34703.7	21623	4570.81	10000.7	25057.4	8390.62	15.3183	14.8257	15.0828	14.4003	12.1582	13.2878	14.6129	13.0346	14.9068	0.411562	-0.0811095	0.176037
602	Pavir.Ib00061.1	Pavir.Ib00061.1	1132	29081	35	35	6	6	43.3	206968	1	1	1	877.967	1753.92	2	1753.92	0.0013	0	51.2		28	0.00029	R	DIDLVMTQASVSR	A	Oxidation (M)	0.0000030000000.0	File838 Spectrum270586 scans: 12481	40232.6	43877.1	36440.5	35537.4	16203.2	23930.8	25481.4	18431.6	15.2961	15.4212	15.1533	15.1171	13.984	14.5466	14.6372	14.1699	15.2469	0.0491862	0.174289	-0.0936358
602	Pavir.Ib00061.1	Pavir.Ib00061.1	1132	29081	35	35	6	6	43.3	300331	1	1	1	1069.08	2136.15	2	2136.16	-0.0076	0	58.81		30	7.1e-05	K	SPTSETYVIFGEAK	I			File837 Spectrum251944 scans: 16368	35495.5	25645.7	38307.1	21210.3	11633.2	18066.6	26480.1	13924.6	15.1153	14.6464	15.2253	14.3725	13.506	14.141	14.6926	13.7653	14.8399	0.275454	-0.193467	0.385432
602	Pavir.Ib00061.1	Pavir.Ib00061.1	1132	29081	35	35	6	6	43.3	206936	1	1	1	877.966	1753.92	2	1753.92	-0.0021	0	45.4	16	29	0.0011	R	DIDLVMTQASVSR	A	Oxidation (M)	0.0000030000000.0	File841 Spectrum337467 scans: 11620	25938.2	23129.2	26997	21463.5	10086.7	12727.9	21738.7	11760.8	14.6628	14.4974	14.7205	14.3896	13.3002	13.6357	14.408	13.5217	14.5676	0.095211	-0.0701556	0.152928
602	Pavir.Ib00061.1	Pavir.Ib00061.1	1132	29081	35	35	6	6	43.3	300327	1	1	1	1069.08	2136.15	2	2136.16	-0.0103	0	44.19		30	0.0019	K	SPTSETYVIFGEAK	I			File837 Spectrum252018 scans: 16447	25048.7	15864.2	24595.2	13680	5980.71	10779.5	16733.6	9344.71	14.6124	13.9535	14.5861	13.7398	12.5461	13.396	14.0305	13.1899	14.223	0.389499	-0.269467	0.363138
602	Pavir.Ib00061.1	Pavir.Ib00061.1	1132	29081	35	35	6	6	43.3	237543	1	1	1	622.685	1865.03	3	1865.04	-0.0037	0	45.02	22	29	0.0016	M	VSEQAPAAEVEK	T			File829 Spectrum53848 scans: 8152	22121.3	21368	20442	13148.8	4433.76	8119.68	15287.8	7039.64	14.4332	14.3832	14.3193	13.6826	12.1143	12.9872	13.9001	12.7813	14.2046	0.228597	0.178614	0.114698
602	Pavir.Ib00061.1	Pavir.Ib00061.1	1132	29081	35	35	6	6	43.3	317498	1	1	1	1119.1	2236.18	2	2236.18	0.0031	0	83.62	27	30	2.5e-07	K	IEDLSSQLQAQAAQQFR	M			File827 Spectrum19213 scans: 23628	21551.5	19615.1	21783.6	12125.5	4304.22	7383.27	13115.3	6461.13	14.3955	14.2597	14.411	13.5658	12.0715	12.85	13.679	12.6576	14.158	0.23753	0.101706	0.252984
602	Pavir.Ib00061.1	Pavir.Ib00061.1	1132	29081	35	35	6	6	43.3	317500	1	1	1	1119.1	2236.18	2	2236.18	0.0051	0	68.69	26	30	8e-06	K	IEDLSSQLQAQAAQQFR	M			File827 Spectrum19228 scans: 23644	20811.2	22499.4	26603.7	19819.4	7808.44	11471.8	19294.6	8786.38	14.3451	14.4576	14.6993	14.2746	12.9308	13.4858	14.2359	13.1011	14.4442	-0.0990881	0.0134384	0.255183
602	Pavir.Ib00061.1	Pavir.Ib00061.1	1132	29081	35	35	6	6	43.3	317497	1	1	1	1119.1	2236.18	2	2236.18	0.0019	0	87.53	27	30	1e-07	K	IEDLSSQLQAQAAQQFR	M			File827 Spectrum19200 scans: 23614	18995.1	18492.8	18332.6	12512.9	4439.14	7822.75	14732.8	6093.4	14.2133	14.1747	14.1621	13.6111	12.1161	12.9335	13.8467	12.573	14.0403	0.17302	0.134356	0.121809
602	Pavir.Ib00061.1	Pavir.Ib00061.1	1132	29081	35	35	6	6	43.3	231825	1	1	1	923.978	1845.94	2	1845.94	-0.0038	0	63.24	24	28	1.9e-05	K	AHDGDIVSAIMELTA	-			File827 Spectrum24143 scans: 28887	10074.9	12108	10621.6	5744.14	23109.9	4537.54	5392.25	6449.92	13.2985	13.5637	13.3747	12.4879	14.4962	12.1477	12.3967	12.6551	13.1812	0.117298	0.382484	0.193529
602	Pavir.Ib00061.1	Pavir.Ib00061.1	1132	29081	35	35	6	6	43.3	206942	1	1	1	585.646	1753.92	3	1753.92	-0.0014	0	34.71	24	28	0.013	R	DIDLVMTQASVSR	A	Oxidation (M)	0.0000030000000.0	File841 Spectrum337450 scans: 11602	8259.04	38455.7	12243.7	7614.81	9697.99	7864.29	8087.38	8478.07	13.0118	15.2309	13.5797	12.8946	13.2435	12.9411	12.9815	13.0495	13.6793	-0.667494	1.55166	-0.0995047
602	Pavir.Ib00061.1	Pavir.Ib00061.1	1132	29081	35	35	6	6	43.3	236709	1	1	1	931.978	1861.94	2	1861.94	0.0019	0	46.02	17	28	0.00092	K	AHDGDIVSAIMELTA	-	Oxidation (M)	0.000000000030000.0	File843 Spectrum396136 scans: 24507	7440.66	4658.48	7840.87	8133.89	3038.3	3710.43	4968.6	1896.97	12.8612	12.1856	12.9368	12.9897	11.569	11.8574	12.2786	10.8895	12.7433	0.117869	-0.557704	0.193452
602	Pavir.Ib00061.1	Pavir.Ib00061.1	1132	29081	35	35	6	6	43.3	236686	1	1	1	931.975	1861.93	2	1861.94	-0.005	0	62.01		28	2.2e-05	K	AHDGDIVSAIMELTA	-	Oxidation (M)	0.000000000030000.0	File842 Spectrum372252 scans: 24193	6796.89	7953.82	6552.13	6101.4	3853.69	5228.51	4923.12	4088.8	12.7307	12.9574	12.6777	12.5749	11.912	12.3522	12.2654	11.9975	12.7352	-0.00453072	0.222241	-0.0574427
602	Pavir.Ib00061.1	Pavir.Ib00061.1	1132	29081	35	35	6	6	43.3	300335	1	1	1	713.059	2136.15	3	2136.16	-0.0021	0	43.5	18	30	0.0024	K	SPTSETYVIFGEAK	I			File837 Spectrum251899 scans: 16320	6785.71	7468.9	8103.36	4434	3708.54	4009.32	4634.65	2612.26	12.7283	12.8667	12.9843	12.1144	11.8566	11.9691	12.1782	11.3511	12.6734	0.0548691	0.193265	0.310888
602	Pavir.Ib00061.1	Pavir.Ib00061.1	1132	29081	35	35	6	6	43.3	236689	1	1	1	931.975	1861.94	2	1861.94	-0.0043	0	44.92		28	0.0011	K	AHDGDIVSAIMELTA	-	Oxidation (M)	0.000000000030000.0	File842 Spectrum372227 scans: 24166	4245.81	4416.57	4565.93	3847.5	2327.94	3863.79	3643.01	3233.37	12.0518	12.1087	12.1567	11.9097	11.1848	11.9158	11.8309	11.6588	12.0567	-0.00490826	0.0519776	0.099959
602	Pavir.Ib00061.1	Pavir.Ib00061.1	1132	29081	35	35	6	6	43.3	236705	1	1	1	931.977	1861.94	2	1861.94	-0.0004	0	54.79		28	0.00012	K	AHDGDIVSAIMELTA	-	Oxidation (M)	0.000000000030000.0	File842 Spectrum372704 scans: 24675	3378.53	4377.73	3922.75	3032.17	1533.78	2053.51	2634.23	2339.82	11.7222	12.096	11.9376	11.5661	10.5829	11.0039	11.3632	11.1922	11.8305	-0.108303	0.265484	0.107167
602	Pavir.Ib00061.1	Pavir.Ib00061.1	1132	29081	35	35	6	6	43.3	236675	1	1	1	931.973	1861.93	2	1861.94	-0.0092	0	63.35		28	1.5e-05	K	AHDGDIVSAIMELTA	-	Oxidation (M)	0.000000000030000.0	File842 Spectrum372721 scans: 24693	3358.32	4078.84	2635.73	3246.23	2023.51	1561.45	2625.52	1672.74	11.7135	11.9939	11.364	11.6646	10.9826	10.6087	11.3584	10.708	11.684	0.0295219	0.309942	-0.320015
621	Pavir.J00158.1	Pavir.J00158.1	1100	28461	62	62	8	8	40.2	127327	1	1	1	504.633	1510.88	3	1510.88	-0.0051	0	34.13	21	29	0.017	K	TAEALEAAK	H			File832 Spectrum126646 scans: 9794	7753.21	12698.2	3214.75	5392.97	74310	89736.4	52236	38275.7	12.9206	13.6323	11.6505	12.3969	16.1813	16.4534	15.6728	15.2241	12.6501	0.27051	0.98227	-0.999578
621	Pavir.J00158.1	Pavir.J00158.1	1100	28461	62	62	8	8	40.2	127330	1	1	1	756.446	1510.88	2	1510.88	-0.0043	0	59.61		29	4.8e-05	K	TAEALEAAK	H			File832 Spectrum126590 scans: 9734	5994.37	2579.48	4786.08	7255.83	75636.2	95574	53166.6	42547.3	12.5494	11.3329	12.2246	12.8249	16.2068	16.5443	15.6982	15.3768	12.233	0.31644	-0.900087	-0.00832335
621	Pavir.J00158.1	Pavir.J00158.1	1100	28461	62	62	8	8	40.2	127333	1	1	1	756.447	1510.88	2	1510.88	-0.0032	0	46.53	26	30	0.0013	K	TAEALEAAK	H			File831 Spectrum103271 scans: 9848	5355.85	27766.6	5300.4	12511.7	131437	139349	77962.6	57267.9	12.3869	14.7611	12.3719	13.611	17.004	17.0883	16.2505	15.8054	13.2827	-0.89581	1.47835	-0.910822
621	Pavir.J00158.1	Pavir.J00158.1	1100	28461	62	62	8	8	40.2	127321	1	1	1	756.445	1510.88	2	1510.88	-0.0066	0	51.2	24	29	0.00035	K	TAEALEAAK	H			File832 Spectrum126575 scans: 9718	5187.89	2861.82	3787.05	7649.24	74559.5	88824.4	50960.8	40293.8	12.3409	11.4827	11.8869	12.9011	16.1861	16.4387	15.6371	15.2983	12.1529	0.18803	-0.670184	-0.266044
621	Pavir.J00158.1	Pavir.J00158.1	1100	28461	62	62	8	8	40.2	127324	1	1	1	756.445	1510.88	2	1510.88	-0.0062	0	33.07	22	29	0.023	K	TAEALEAAK	H			File832 Spectrum126635 scans: 9782	4535.35	2697.52	1964.32	4232.87	42305.3	52155.5	26823.8	19552.7	12.147	11.3974	10.9398	12.0474	15.3686	15.6705	14.7112	14.2551	11.6329	0.514086	-0.235496	-0.693097
621	Pavir.J00158.1	Pavir.J00158.1	1100	28461	62	62	8	8	40.2	127322	1	1	1	504.632	1510.88	3	1510.88	-0.0066	0	35.56	24	29	0.013	K	TAEALEAAK	H			File832 Spectrum126673 scans: 9823	4400.14	11200.3	4616.85	6109.42	29846.6	37016.1	21029.4	17445	12.1033	13.4512	12.1727	12.5768	14.8653	15.1759	14.3601	14.0905	12.576	-0.472691	0.875225	-0.40333
621	Pavir.J00158.1	Pavir.J00158.1	1100	28461	62	62	8	8	40.2	127335	1	1	1	504.634	1510.88	3	1510.88	-0.0027	0	33.37	22	30	0.026	K	TAEALEAAK	H			File831 Spectrum103098 scans: 9663	3272.03	13570.1	4475.73	6319.51	34413.7	46913.3	25336.7	17803.7	11.676	13.7281	12.1279	12.6256	15.0707	15.5177	14.6289	14.1199	12.5394	-0.863436	1.18874	-0.411499
621	Pavir.J00158.1	Pavir.J00158.1	1100	28461	62	62	8	8	40.2	127326	1	1	1	504.633	1510.88	3	1510.88	-0.0053	0	33.48	21	29	0.02	K	TAEALEAAK	H			File832 Spectrum126519 scans: 9658	2968.87	9689.74	3697.76	5723.67	31228.7	41172.3	21696.6	16099.6	11.5357	13.2422	11.8524	12.4827	14.9306	15.3294	14.4052	13.9747	12.2783	-0.742578	0.963967	-0.425838
621	Pavir.J00158.1	Pavir.J00158.1	1100	28461	62	62	8	8	40.2	105082	1	1	1	721.914	1441.81	2	1441.82	-0.0032	0	49.2	19	29	0.00059	K	AGQAMGATK	D			File834 Spectrum169236 scans: 4457	2780.86	1196.93	716.012	7273.77	123767	145940	82326.1	71170	11.4413	10.2251	9.48384	12.8285	16.9173	17.155	16.3291	16.119	10.9947	0.446624	-0.769566	-1.51085
621	Pavir.J00158.1	Pavir.J00158.1	1100	28461	62	62	8	8	40.2	123271	1	1	1	750.429	1498.84	2	1498.85	-0.0023	0	39.4	27	29	0.0053	K	TAEATEAAK	Q			File827 Spectrum1230 scans: 4446	1500.71	4726.47	1383.93	3022.24	41342.6	40590.7	21283.7	17007.7	10.5514	12.2065	10.4346	11.5614	15.3353	15.3089	14.3775	14.0539	11.1885	-0.637058	1.01806	-0.753925
621	Pavir.J00158.1	Pavir.J00158.1	1100	28461	62	62	8	8	40.2	105084	1	1	1	721.915	1441.82	2	1441.82	-0.0017	0	48.39	22	29	0.00072	K	AGQAMGATK	D			File835 Spectrum194868 scans: 4426	1076.1	796.389	744.235	2250.21	27581.1	37514.6	18642	17153.5	10.0716	9.63733	9.53961	11.1358	14.7514	15.1952	14.1863	14.0662	10.0961	-0.0245	-0.458767	-0.556482
621	Pavir.J00158.1	Pavir.J00158.1	1100	28461	62	62	8	8	40.2	105078	1	1	1	721.913	1441.81	2	1441.82	-0.0049	0	42.68	19	30	0.003	K	AGQAMGATK	D			File835 Spectrum194975 scans: 4540	624.253	714.636	443.384	1091.76	12400.8	14388.8	8767.9	8537.49	9.28599	9.48106	8.79241	10.0924	13.5981	13.8127	13.098	13.0596	9.41298	-0.12699	0.0680871	-0.620565
699	Pavir.Ia03444.1	Pavir.Ia03444.1	983	49759	46	46	9	9	31.6	87803	1	1	1	692.871	1383.73	2	1383.73	-0.0016	0	47.12	21	27	0.00051	K	ADEGFSVTVR	N			File834 Spectrum175056 scans: 10665	323489	333366	339466	401202	1.06962e+06	1.46628e+06	742452	732217	18.3034	18.3467	18.3729	18.614	20.0287	20.4837	19.5019	19.4819	18.4092	-0.10589	-0.062497	-0.036337
699	Pavir.Ia03444.1	Pavir.Ia03444.1	983	49759	46	46	9	9	31.6	115740	1	1	1	738.859	1475.7	2	1475.71	-0.0028	0	33.38		23	0.0051	K	ADEGYCLTVR	D	Methylthio (C)	0.0000020000.0	File836 Spectrum228051 scans: 14441	152857	201762	136935	162082	347600	655416	322403	343405	17.2218	17.6223	17.0631	17.3064	18.4071	19.3221	18.2985	18.3896	17.3034	-0.0815815	0.318891	-0.240271
699	Pavir.Ia03444.1	Pavir.Ia03444.1	983	49759	46	46	9	9	31.6	132158	1	1	1	763.934	1525.85	2	1525.85	0.001	0	55.3		29	0.00014	R	DGNVVLAPANPR	D			File838 Spectrum266060 scans: 7654	144293	280002	157778	195154	402597	555462	333095	406414	17.1386	18.0951	17.2675	17.5743	18.619	19.0833	18.3456	18.6326	17.5189	-0.380237	0.576199	-0.251336
699	Pavir.Ia03444.1	Pavir.Ia03444.1	983	49759	46	46	9	9	31.6	87797	1	1	1	692.871	1383.73	2	1383.73	-0.0028	0	48.89	21	26	0.00029	K	ADEGFSVTVR	N			File834 Spectrum174967 scans: 10570	115006	164710	156282	155746	358443	591040	267973	277034	16.8113	17.3296	17.2538	17.2488	18.4514	19.1729	18.0317	18.0797	17.1609	-0.349539	0.168683	0.0929035
699	Pavir.Ia03444.1	Pavir.Ia03444.1	983	49759	46	46	9	9	31.6	132159	1	1	1	763.934	1525.85	2	1525.85	0.001	0	59.33		29	5.7e-05	R	DGNVVLAPANPR	D			File838 Spectrum266151 scans: 7751	62516.7	98663.2	60171.4	66767.8	176183	256302	135739	184203	15.932	16.5902	15.8768	16.0269	17.4267	17.9675	17.0505	17.4909	16.1065	-0.174505	0.483766	-0.229667
699	Pavir.Ia03444.1	Pavir.Ia03444.1	983	49759	46	46	9	9	31.6	115747	1	1	1	738.86	1475.71	2	1475.71	-0.0004	0	46.02		23	0.0003	K	ADEGYCLTVR	D	Methylthio (C)	0.0000020000.0	File838 Spectrum272479 scans: 14501	60253	85578.7	53987.1	69578.3	128959	272187	116549	143618	15.8787	16.385	15.7203	16.0864	16.9766	18.0542	16.8306	17.1319	16.0176	-0.138851	0.367368	-0.297271
699	Pavir.Ia03444.1	Pavir.Ia03444.1	983	49759	46	46	9	9	31.6	132155	1	1	1	763.933	1525.85	2	1525.85	-0.0006	0	62.02		29	2.7e-05	R	DGNVVLAPANPR	D			File836 Spectrum221682 scans: 7647	44958.4	81190.1	30176.2	61559.5	128193	179250	103177	123774	15.4563	16.309	14.8811	15.9097	16.968	17.4516	16.6548	16.9173	15.639	-0.182731	0.669982	-0.757911
699	Pavir.Ia03444.1	Pavir.Ia03444.1	983	49759	46	46	9	9	31.6	115741	1	1	1	738.859	1475.7	2	1475.71	-0.0024	0	35.05	17	23	0.0034	K	ADEGYCLTVR	D	Methylthio (C)	0.0000020000.0	File836 Spectrum228143 scans: 14539	36358.2	30366.4	55914.7	36126.7	65618.2	123992	51934.4	57155.8	15.15	14.8902	15.7709	15.1408	16.0018	16.9199	15.6644	15.8026	15.238	-0.0879816	-0.347786	0.532965
699	Pavir.Ia03444.1	Pavir.Ia03444.1	983	49759	46	46	9	9	31.6	132160	1	1	1	763.934	1525.85	2	1525.85	0.001	0	70.97	18	29	3.9e-06	R	DGNVVLAPANPR	D			File838 Spectrum265974 scans: 7562	29282.2	52241.6	30703.3	38788.2	75736.2	122677	65711.7	76674.8	14.8377	15.6729	14.9061	15.2433	16.2087	16.9045	16.0039	16.2265	15.165	-0.327284	0.507889	-0.258913
699	Pavir.Ia03444.1	Pavir.Ia03444.1	983	49759	46	46	9	9	31.6	176948	1	1	1	551.997	1652.97	3	1652.97	-0.0021	0	32.66	19	29	0.024	R	DGTNIVLWK	W			File843 Spectrum387686 scans: 15494	25264.1	23631.3	13965.6	18844.7	65861	86161.7	41429.6	44935.3	14.6248	14.5284	13.7696	14.2019	16.0071	16.3948	15.3384	15.4556	14.2812	0.343634	0.247243	-0.511576
699	Pavir.Ia03444.1	Pavir.Ia03444.1	983	49759	46	46	9	9	31.6	176953	1	1	1	551.998	1652.97	3	1652.97	0.0005	0	36.04	20	29	0.012	R	DGTNIVLWK	W			File843 Spectrum387762 scans: 15575	24153.9	23819.7	30637.9	26730.5	80603.6	107485	50321.6	37322.8	14.56	14.5399	14.903	14.7062	16.2986	16.7138	15.6189	15.1878	14.6773	-0.117297	-0.137401	0.225763
699	Pavir.Ia03444.1	Pavir.Ia03444.1	983	49759	46	46	9	9	31.6	273619	1	1	1	671.366	2011.08	3	2011.08	-0.0064	0	47.68	20	30	0.00093	K	DEEGNPAFALVNK	A			File838 Spectrum273636 scans: 15735	23872.6	43812.9	20359.5	36187.4	53601.6	68844.5	48319.2	91821.4	14.5431	15.4191	14.3134	15.1432	15.71	16.0711	15.5603	16.4865	14.8547	-0.311618	0.564381	-0.541272
699	Pavir.Ia03444.1	Pavir.Ia03444.1	983	49759	46	46	9	9	31.6	115739	1	1	1	738.858	1475.7	2	1475.71	-0.0034	0	33.35		23	0.0053	K	ADEGYCLTVR	D	Methylthio (C)	0.0000020000.0	File836 Spectrum227965 scans: 14349	23102.4	45292.6	30799.9	32440.7	56190.1	106994	47221.3	56673.7	14.4958	15.467	14.9106	14.9855	15.778	16.7072	15.5271	15.7904	14.9647	-0.468969	0.502263	-0.054086
699	Pavir.Ia03444.1	Pavir.Ia03444.1	983	49759	46	46	9	9	31.6	428399	1	1	1	1072.89	3215.66	3	3215.66	0.0006	0	45.26	23	31	0.0022	K	LVPFNPQYQDESVLWTESGDVGK	G			File843 Spectrum394738 scans: 23016	21718.7	42937.9	16859.4	23794.1	45131.5	57707.7	23376.2	33017.6	14.4066	15.39	14.0413	14.5383	15.4618	15.8165	14.5128	15.0109	14.594	-0.187402	0.795914	-0.55278
699	Pavir.Ia03444.1	Pavir.Ia03444.1	983	49759	46	46	9	9	31.6	273635	1	1	1	1006.55	2011.08	2	2011.08	-0.002	0	78.74	22	30	7.4e-07	K	DEEGNPAFALVNK	A			File838 Spectrum273498 scans: 15587	17892.2	26534.9	17322.9	23320	44482.7	70943.2	42918	58624.5	14.127	14.6956	14.0804	14.5093	15.441	16.1144	15.3893	15.8392	14.3531	-0.226036	0.342524	-0.272687
699	Pavir.Ia03444.1	Pavir.Ia03444.1	983	49759	46	46	9	9	31.6	176950	1	1	1	551.997	1652.97	3	1652.97	-0.0014	0	29.51	18	29	0.052	R	DGTNIVLWK	W			File843 Spectrum387826 scans: 15643	17332.3	17802.9	23692.1	24324	40323.6	62770.5	26969.3	28925.4	14.0812	14.1198	14.5321	14.5701	15.2993	15.9378	14.719	14.8201	14.3258	-0.244631	-0.205975	0.206315
699	Pavir.Ia03444.1	Pavir.Ia03444.1	983	49759	46	46	9	9	31.6	115745	1	1	1	738.86	1475.7	2	1475.71	-0.0006	0	33.43		23	0.0051	K	ADEGYCLTVR	D	Methylthio (C)	0.0000020000.0	File838 Spectrum272399 scans: 14415	14187.4	21129.2	13451.8	16307.4	26218.4	56774.7	25619.8	28387.3	13.7923	14.3669	13.7155	13.9932	14.6783	15.793	14.645	14.793	13.967	-0.174682	0.399943	-0.251493
699	Pavir.Ia03444.1	Pavir.Ia03444.1	983	49759	46	46	9	9	31.6	273630	1	1	1	671.367	2011.08	3	2011.08	-0.0031	0	49.42	26	30	0.00062	K	DEEGNPAFALVNK	A			File838 Spectrum273697 scans: 15800	12337.7	18166	14342	17308.5	30341.5	32295.1	27839.7	35215	13.5908	14.149	13.808	14.0792	14.889	14.979	14.7649	15.1039	13.9067	-0.315938	0.24223	-0.098764
699	Pavir.Ia03444.1	Pavir.Ia03444.1	983	49759	46	46	9	9	31.6	115746	1	1	1	738.86	1475.71	2	1475.71	-0.0004	0	32.74	15	23	0.0063	K	ADEGYCLTVR	D	Methylthio (C)	0.0000020000.0	File838 Spectrum272575 scans: 14603	11011.3	16811.4	10126.3	14119.6	23365	39158.5	22533.4	24261.5	13.4267	14.0372	13.3058	13.7854	14.5121	15.257	14.4598	14.5664	13.6388	-0.212071	0.39838	-0.332948
699	Pavir.Ia03444.1	Pavir.Ia03444.1	983	49759	46	46	9	9	31.6	328401	1	1	1	1154.09	2306.16	2	2306.16	0.0017	0	60.85		29	4.1e-05	K	ILPWGDEAYAGGSSAANAPR	G			File845 Spectrum437308 scans: 18147	8449.49	9398.29	8103.24	8542.54	33776.3	47197.7	22713.2	17691.6	13.0446	13.1982	12.9843	13.0604	15.0437	15.5264	14.4712	14.1108	13.0719	-0.027242	0.126291	-0.0876075
699	Pavir.Ia03444.1	Pavir.Ia03444.1	983	49759	46	46	9	9	31.6	132149	1	1	1	763.932	1525.85	2	1525.85	-0.0019	0	45.77		29	0.0012	R	DGNVVLAPANPR	D			File836 Spectrum221747 scans: 7716	8029.84	12514.3	6789.22	9170.79	20303.8	26833.5	15480.4	19362.1	12.9712	13.6113	12.729	13.1628	14.3095	14.7117	13.9182	14.2409	13.1186	-0.14742	0.492711	-0.389546
699	Pavir.Ia03444.1	Pavir.Ia03444.1	983	49759	46	46	9	9	31.6	273620	1	1	1	671.366	2011.08	3	2011.08	-0.0058	0	42.11	22	30	0.0033	K	DEEGNPAFALVNK	A			File838 Spectrum273745 scans: 15851	7330.26	10649.8	5970.51	8712.02	12466.4	24537.1	16444.2	16301.4	12.8396	13.3785	12.5436	13.0888	13.6058	14.5827	14.0053	13.9927	12.9627	-0.123005	0.415882	-0.419014
699	Pavir.Ia03444.1	Pavir.Ia03444.1	983	49759	46	46	9	9	31.6	428401	1	1	1	1072.89	3215.66	3	3215.66	0.0028	0	47.37	21	31	0.0014	K	LVPFNPQYQDESVLWTESGDVGK	G			File843 Spectrum394667 scans: 22940	6782.65	12451.5	9336.83	8608.08	15852.8	20418.2	6898.21	8852.53	12.7276	13.604	13.1887	13.0715	13.9525	14.3176	12.752	13.1119	13.148	-0.420329	0.456063	0.0407542
699	Pavir.Ia03444.1	Pavir.Ia03444.1	983	49759	46	46	9	9	31.6	132150	1	1	1	763.932	1525.85	2	1525.85	-0.0017	0	53.36		29	0.0002	R	DGNVVLAPANPR	D			File838 Spectrum266247 scans: 7853	6279.09	7685.16	5109.36	5515.78	13275.5	15930.7	9696.13	13330.4	12.6163	12.9079	12.3189	12.4293	13.6965	13.9595	13.2432	13.7024	12.5681	0.0482204	0.339741	-0.249192
699	Pavir.Ia03444.1	Pavir.Ia03444.1	983	49759	46	46	9	9	31.6	132147	1	1	1	763.932	1525.85	2	1525.85	-0.002	0	53.69	19	29	0.00019	R	DGNVVLAPANPR	D			File836 Spectrum221762 scans: 7732	5536.77	6924.65	4753.75	4755.03	10164.6	14997.9	8885.39	9710.2	12.4348	12.7575	12.2149	12.2152	13.3113	13.8725	13.1172	13.2453	12.4056	0.0292179	0.351915	-0.190759
699	Pavir.Ia03444.1	Pavir.Ia03444.1	983	49759	46	46	9	9	31.6	328393	1	1	1	769.726	2306.16	3	2306.16	-0.0028	0	43.16		29	0.0024	K	ILPWGDEAYAGGSSAANAPR	G			File845 Spectrum437260 scans: 18096	4995.17	12315	10421.1	9038.83	9320.65	13727.5	5071.55	11093.7	12.2863	13.5881	13.3472	13.1419	13.1862	13.7448	12.3082	13.4375	13.0909	-0.804578	0.497232	0.25632
699	Pavir.Ia03444.1	Pavir.Ia03444.1	983	49759	46	46	9	9	31.6	428402	1	1	1	1072.9	3215.66	3	3215.66	0.0039	0	52.16	21	31	0.00045	K	LVPFNPQYQDESVLWTESGDVGK	G			File843 Spectrum394798 scans: 23080	4200.91	10580.4	5912.18	3487.51	13693.2	13823.1	6243.21	9573.42	12.0365	13.3691	12.5295	11.768	13.7412	13.7548	12.6081	13.2248	12.4258	-0.389274	0.943342	0.103713
699	Pavir.Ia03444.1	Pavir.Ia03444.1	983	49759	46	46	9	9	31.6	115744	1	1	1	492.909	1475.7	3	1475.71	-0.0011	0	34.7	19	23	0.0038	K	ADEGYCLTVR	D	Methylthio (C)	0.0000020000.0	File836 Spectrum228087 scans: 14479	4047.33	4226.12	4935.69	6376.96	11155.3	14714.6	8859.47	8189.93	11.9828	12.0451	12.269	12.6387	13.4454	13.845	13.113	12.9996	12.2339	-0.251135	-0.188771	0.0351444
699	Pavir.Ia03444.1	Pavir.Ia03444.1	983	49759	46	46	9	9	31.6	428397	1	1	1	1072.89	3215.65	3	3215.66	-0.0133	0	39.68	18	31	0.008	K	LVPFNPQYQDESVLWTESGDVGK	G			File841 Spectrum349077 scans: 24004	4037.65	2648.79	2613.69	4694.94	9050.48	13647.1	8107.57	5639.34	11.9793	11.3711	11.3519	12.1969	13.1438	13.7363	12.9851	12.4613	11.7248	0.254506	-0.353678	-0.372923
699	Pavir.Ia03444.1	Pavir.Ia03444.1	983	49759	46	46	9	9	31.6	428464	1	1	1	1073.22	3216.64	3	3216.64	-0.0052	0	51.01	22	31	0.00059	K	LVPFNPQYQDESVLWTESGDVGK	G	Deamidated (NQ)	0.00000010000000000000000.0	File841 Spectrum348908 scans: 23824	3229.31	1211.7	4372.28	1956.2	9669.77	22535.4	8630.27	7574.43	11.657	10.2428	12.0942	10.9338	13.2393	14.4599	13.0752	12.8869	11.232	0.425052	-0.989144	0.86221
699	Pavir.Ia03444.1	Pavir.Ia03444.1	983	49759	46	46	9	9	31.6	115748	1	1	1	492.909	1475.71	3	1475.71	-0.0003	0	38.88	16	23	0.0015	K	ADEGYCLTVR	D	Methylthio (C)	0.0000020000.0	File838 Spectrum272475 scans: 14496	3192.57	4554.78	3736.04	3302.75	4052.72	7943.39	3808.13	5613.55	11.6405	12.1532	11.8673	11.6895	11.9847	12.9555	11.8949	12.4547	11.8376	-0.1971	0.315561	0.029691
699	Pavir.Ia03444.1	Pavir.Ia03444.1	983	49759	46	46	9	9	31.6	87796	1	1	1	462.25	1383.73	3	1383.73	-0.0029	0	30.84	16	26	0.018	K	ADEGFSVTVR	N			File834 Spectrum174962 scans: 10564	2751.29	4563.37	2195.42	3118.25	3344.25	3617.67	4211.6	4513.71	11.4259	12.1559	11.1003	11.6065	11.7075	11.8208	12.0402	12.1401	11.5721	-0.146251	0.583741	-0.471865
699	Pavir.Ia03444.1	Pavir.Ia03444.1	983	49759	46	46	9	9	31.6	115738	1	1	1	492.908	1475.7	3	1475.71	-0.0036	0	27.51	15	23	0.018	K	ADEGYCLTVR	D	Methylthio (C)	0.0000020000.0	File836 Spectrum228000 scans: 14386	2425.86	8508.74	3582.98	7327.86	4771.59	8038.83	6389.02	6726.85	11.2443	13.0547	11.8069	12.8392	12.2203	12.9728	12.6414	12.7157	12.2363	-0.992005	0.818448	-0.429336
699	Pavir.Ia03444.1	Pavir.Ia03444.1	983	49759	46	46	9	9	31.6	115749	1	1	1	492.909	1475.71	3	1475.71	0.0008	0	41.2	18	23	0.00093	K	ADEGYCLTVR	D	Methylthio (C)	0.0000020000.0	File838 Spectrum272491 scans: 14513	2181.66	2689.51	2729.56	2663.7	4100.1	6285.72	3103.18	4838.84	11.0912	11.3931	11.4145	11.3792	12.0014	12.6179	11.5995	12.2404	11.3195	-0.228291	0.0736265	0.0949509
706	Pavir.Ib02894.1	Pavir.Ib02894.1	980	48880	34	34	4	4	15.1	287043	1	1	1	692.393	2074.16	3	2074.16	0.0007	0	37.06		30	0.011	R	YEPEAAAIFSQLK	S			File843 Spectrum394664 scans: 22937	17109.9	15798.9	24904.4	17656.1	77382.1	94361.6	42763.4	49150.8	14.0625	13.9475	14.6041	14.1079	16.2397	16.5259	15.3841	15.5849	14.1805	-0.117973	-0.232984	0.423595
706	Pavir.Ib02894.1	Pavir.Ib02894.1	980	48880	34	34	4	4	15.1	287040	1	1	1	692.393	2074.16	3	2074.16	0.0003	0	36.99	16	30	0.011	R	YEPEAAAIFSQLK	S			File843 Spectrum394617 scans: 22887	10404.7	8575.5	16163.3	10341.5	51103.7	62690.3	30778.5	36033.5	13.3449	13.066	13.9804	13.3362	15.6411	15.936	14.9096	15.137	13.4319	-0.0869363	-0.365881	0.548551
706	Pavir.Ib02894.1	Pavir.Ib02894.1	980	48880	34	34	4	4	15.1	287034	1	1	1	692.391	2074.15	3	2074.16	-0.0054	0	44.26	23	31	0.0025	R	YEPEAAAIFSQLK	S			File842 Spectrum371489 scans: 23379	6172.58	13329.9	8598.98	9001.76	21498.3	24907.3	14284.3	13734	12.5917	13.7024	13.07	13.136	14.3919	14.6043	13.8021	13.7455	13.125	-0.533335	0.57738	-0.0550429
706	Pavir.Ib02894.1	Pavir.Ib02894.1	980	48880	34	34	4	4	15.1	287048	1	1	1	692.394	2074.16	3	2074.16	0.0049	0	40.75		30	0.0043	R	YEPEAAAIFSQLK	S			File843 Spectrum394573 scans: 22840	4980.92	8432.7	7667.62	5693.9	22623.7	30847.1	15004.6	17366.5	12.2822	13.0418	12.9046	12.4752	14.4655	14.9128	13.8731	14.084	12.6759	-0.393739	0.365844	0.228628
706	Pavir.Ib02894.1	Pavir.Ib02894.1	980	48880	34	34	4	4	15.1	287046	1	1	1	692.394	2074.16	3	2074.16	0.0028	0	40.28	16	30	0.005	R	YEPEAAAIFSQLK	S			File843 Spectrum394829 scans: 23113	4109.24	2930.38	5297.09	6147.18	21282.5	23211.9	13176.4	14260.9	12.0047	11.5169	12.371	12.5857	14.3774	14.5026	13.6857	13.7998	12.1196	-0.1149	-0.602683	0.251429
706	Pavir.Ib02894.1	Pavir.Ib02894.1	980	48880	34	34	4	4	15.1	287036	1	1	1	692.392	2074.15	3	2074.16	-0.0014	0	40.95	19	30	0.005	R	YEPEAAAIFSQLK	S			File842 Spectrum371513 scans: 23405	3344.27	5301.54	4927.52	6106.78	15305.4	22938.7	12934.8	12489.5	11.7075	12.3722	12.2666	12.5762	13.9018	14.4855	13.659	13.6084	12.2306	-0.523153	0.141568	0.0360169
706	Pavir.Ib02894.1	Pavir.Ib02894.1	980	48880	34	34	4	4	15.1	287035	1	1	1	692.391	2074.15	3	2074.16	-0.0032	0	48.39	26	30	0.00091	R	YEPEAAAIFSQLK	S			File843 Spectrum394550 scans: 22815	3278.89	3053.91	4177.22	2046.72	10950.6	12334.7	5489.66	5572.07	11.679	11.5764	12.0283	10.9991	13.4187	13.5904	12.4225	12.444	11.5707	0.108276	0.00572679	0.457614
706	Pavir.Ib02894.1	Pavir.Ib02894.1	980	48880	34	34	4	4	15.1	287045	1	1	1	692.393	2074.16	3	2074.16	0.0019	0	38.53	16	30	0.0077	R	YEPEAAAIFSQLK	S			File843 Spectrum394537 scans: 22801	3274.34	3834.88	3830.03	3277.19	9116.59	12100.9	6248.06	5082.13	11.677	11.905	11.9031	11.6782	13.1543	13.5628	12.6092	12.3112	11.7908	-0.113847	0.11413	0.112307
706	Pavir.Ib02894.1	Pavir.Ib02894.1	980	48880	34	34	4	4	15.1	287033	1	1	1	692.39	2074.15	3	2074.16	-0.0081	0	39.24	18	30	0.0073	R	YEPEAAAIFSQLK	S			File842 Spectrum371550 scans: 23444	2569.96	3627.36	3324.68	2585.75	10094.6	10464.9	6043.58	5287.3	11.3275	11.8247	11.699	11.3364	13.3013	13.3533	12.5612	12.3683	11.5469	-0.219368	0.277803	0.152098
708	Pavir.Ib01400.1	Pavir.Ib01400.1	977	20509	36	36	7	7	55.6	201926	1	1	1	579.669	1735.99	3	1735.99	-0.0063	0	40.6	17	29	0.004	K	VEPAADGGSVVK	V			File831 Spectrum101393 scans: 7845	81532.9	51391.7	89108.4	75226.6	254607	402290	215008	198666	16.3151	15.6492	16.4433	16.199	17.9579	18.6179	17.714	17.6	16.1516	0.163452	-0.502395	0.291631
708	Pavir.Ib01400.1	Pavir.Ib01400.1	977	20509	36	36	7	7	55.6	201923	1	1	1	579.669	1735.99	3	1735.99	-0.0065	0	48.72	18	29	0.00062	K	VEPAADGGSVVK	V			File831 Spectrum101363 scans: 7813	65756.9	79923.4	82525.6	48485.4	248575	280159	174921	219856	16.0049	16.2863	16.3326	15.5653	17.9233	18.0959	17.4163	17.7462	16.0473	-0.0423962	0.23908	0.285304
708	Pavir.Ib01400.1	Pavir.Ib01400.1	977	20509	36	36	7	7	55.6	201928	1	1	1	869.001	1735.99	2	1735.99	-0.0058	0	62.88	23	29	2.5e-05	K	VEPAADGGSVVK	V			File831 Spectrum101379 scans: 7830	45926.5	68016	50447.1	29614.6	179293	225692	135778	157520	15.487	16.0536	15.6225	14.854	17.452	17.784	17.0509	17.2652	15.5043	-0.0172455	0.549304	0.118202
708	Pavir.Ib01400.1	Pavir.Ib01400.1	977	20509	36	36	7	7	55.6	201940	1	1	1	869.001	1735.99	2	1735.99	-0.0045	0	44.32	22	29	0.0018	K	VEPAADGGSVVK	V			File831 Spectrum101321 scans: 7768	41564.7	79672.2	42680.1	25558.6	161913	202007	103968	131398	15.3431	16.2818	15.3813	14.6415	17.3049	17.624	16.6658	17.0036	15.4119	-0.0688444	0.869874	-0.0306381
708	Pavir.Ib01400.1	Pavir.Ib01400.1	977	20509	36	36	7	7	55.6	201941	1	1	1	869.002	1735.99	2	1735.99	-0.0034	0	41		29	0.0034	K	VEPAADGGSVVK	V			File831 Spectrum101279 scans: 7723	33610.2	55236.6	41308.4	32457.6	100628	131335	77904.3	90397.6	15.0366	15.7533	15.3341	14.9863	16.6187	17.0029	16.2494	16.464	15.2776	-0.24098	0.475744	0.0565573
708	Pavir.Ib01400.1	Pavir.Ib01400.1	977	20509	36	36	7	7	55.6	201937	1	1	1	869.001	1735.99	2	1735.99	-0.005	0	51.25	24	29	0.00036	K	VEPAADGGSVVK	V			File831 Spectrum101469 scans: 7926	28484	46606.9	37492.1	14282.7	110285	134734	81186.8	107035	14.7979	15.5083	15.1943	13.802	16.7509	17.0398	16.309	16.7077	14.8256	-0.0277365	0.682655	0.368699
708	Pavir.Ib01400.1	Pavir.Ib01400.1	977	20509	36	36	7	7	55.6	373774	1	1	1	883.505	2647.49	3	2647.5	-0.007	0	105.95	20	29	1.2e-09	K	STLVEGGSIGVAIETAASHIK	V			File846 Spectrum468003 scans: 25249	17279.5	14787.4	20954.2	13205.8	61824.5	68886.4	53071.2	54801.4	14.0768	13.8521	14.3549	13.6889	15.9159	16.0719	15.6956	15.7419	13.9932	0.0836034	-0.141093	0.361779
708	Pavir.Ib01400.1	Pavir.Ib01400.1	977	20509	36	36	7	7	55.6	201934	1	1	1	869.001	1735.99	2	1735.99	-0.0055	0	45.05	21	29	0.0015	K	VEPAADGGSVVK	V			File831 Spectrum101539 scans: 8000	10479.2	17641.6	12008.1	4298.23	40382.3	50601.4	34137.3	45619.2	13.3552	14.1067	13.5517	12.0695	15.3014	15.6269	15.0591	15.4774	13.2708	0.0844452	0.835895	0.28093
708	Pavir.Ib01400.1	Pavir.Ib01400.1	977	20509	36	36	7	7	55.6	201938	1	1	1	869.001	1735.99	2	1735.99	-0.0049	0	30.8	21	29	0.04	K	VEPAADGGSVVK	V			File831 Spectrum101549 scans: 8011	9407.49	12418.3	6590.57	5733.12	32092.1	36183.7	26339.9	32221.6	13.1996	13.6002	12.6862	12.4851	14.9699	15.1431	14.685	14.9757	12.9928	0.206829	0.607409	-0.306578
708	Pavir.Ib01400.1	Pavir.Ib01400.1	977	20509	36	36	7	7	55.6	201933	1	1	1	579.67	1735.99	3	1735.99	-0.0056	0	38.6	15	29	0.0066	K	VEPAADGGSVVK	V			File832 Spectrum124861 scans: 7890	9066.86	22809.2	17465.6	10303.7	35493.5	31978	22221.6	27456.7	13.1464	14.4773	14.0922	13.3309	15.1153	14.9648	14.4397	14.7449	13.7617	-0.615318	0.715624	0.330523
708	Pavir.Ib01400.1	Pavir.Ib01400.1	977	20509	36	36	7	7	55.6	373781	1	1	1	883.507	2647.5	3	2647.5	-0.0003	0	96.46	20	29	9.8e-09	K	STLVEGGSIGVAIETAASHIK	V			File846 Spectrum467903 scans: 25142	6614.58	8637.85	10136	5425.4	20629.4	23381.5	18984.9	18734.3	12.6914	13.0765	13.3072	12.4055	14.3324	14.5131	14.2126	14.1934	12.8702	-0.178719	0.206304	0.437052
708	Pavir.Ib01400.1	Pavir.Ib01400.1	977	20509	36	36	7	7	55.6	373780	1	1	1	883.507	2647.5	3	2647.5	-0.0027	0	111.41	21	29	3.2e-10	K	STLVEGGSIGVAIETAASHIK	V			File846 Spectrum467896 scans: 25134	4863.67	7128.32	7118.51	5140.12	15420.8	16981.7	14457.4	13083.7	12.2478	12.7993	12.7974	12.3276	13.9126	14.0517	13.8195	13.6755	12.543	-0.2952	0.256315	0.254328
708	Pavir.Ib01400.1	Pavir.Ib01400.1	977	20509	36	36	7	7	55.6	373777	1	1	1	883.506	2647.5	3	2647.5	-0.0054	0	96.77	20	29	9.8e-09	K	STLVEGGSIGVAIETAASHIK	V			File846 Spectrum468092 scans: 25344	4846.25	6599.9	9878.03	5654.95	25845.4	21817.4	18642	16727.4	12.2427	12.6882	13.27	12.4653	14.6576	14.4132	14.1863	14.0299	12.6665	-0.423894	0.0216814	0.603461
708	Pavir.Ib01400.1	Pavir.Ib01400.1	977	20509	36	36	7	7	55.6	373782	1	1	1	883.508	2647.5	3	2647.5	0.0001	0	102.54	22	29	2.4e-09	K	STLVEGGSIGVAIETAASHIK	V			File846 Spectrum468113 scans: 25366	4510.54	3265.74	4801.46	4445.86	13201.9	15119.2	12277	13050.1	12.1391	11.6732	12.2293	12.1182	13.6885	13.8841	13.5837	13.6718	12.0399	0.0991382	-0.366752	0.189313
708	Pavir.Ib01400.1	Pavir.Ib01400.1	977	20509	36	36	7	7	55.6	373783	1	1	1	662.883	2647.5	4	2647.5	0.0003	0	35.21	16	29	0.013	K	STLVEGGSIGVAIETAASHIK	V			File827 Spectrum20479 scans: 24979	3616.53	3378.76	4005.91	5715.05	6355.07	5945.39	4767.13	7141.67	11.8204	11.7223	11.9679	12.4806	12.6337	12.5376	12.2189	12.802	11.9978	-0.177394	-0.275505	-0.0298694
736	Pavir.J08126.1	Pavir.J08126.1	943	39214	37	37	5	5	22.5	409903	1	1	1	994.185	2979.53	3	2979.54	-0.0032	0	79.93		31	7.5e-07	R	NNEAALAAAVAHQPVSVAINGADPAFR	F	2 Deamidated (NQ)	0.010000000000000000010000000.0	File837 Spectrum254964 scans: 19590	15959.2	12533.3	14502.9	8717.99	3101.3	1920.81	6247.77	6121.43	13.9621	13.6135	13.8241	13.0898	11.5987	10.9075	12.6091	12.5797	13.6224	0.339749	-0.00887726	0.2017
736	Pavir.J08126.1	Pavir.J08126.1	943	39214	37	37	5	5	22.5	409848	1	1	1	993.857	2978.55	3	2978.55	-0.0034	0	75.22		31	2.2e-06	R	NNEAALAAAVAHQPVSVAINGADPAFR	F	Deamidated (NQ)	0.000000000000000000010000000.0	File842 Spectrum367430 scans: 19049	10706.9	8960.31	8271.64	5211.65	3770.56	3138.13	2874.19	4551.83	13.3863	13.1293	13.014	12.3475	11.8806	11.6157	11.4889	12.1522	12.9693	0.416988	0.160065	0.0446912
736	Pavir.J08126.1	Pavir.J08126.1	943	39214	37	37	5	5	22.5	409852	1	1	1	993.858	2978.55	3	2978.55	0.0006	0	66.83		31	1.6e-05	R	NNEAALAAAVAHQPVSVAINGADPAFR	F	Deamidated (NQ)	0.000000000000000000010000000.0	File841 Spectrum344776 scans: 19416	10164.4	10357.7	8672.51	4633.14	3822.13	2369.9	3059.65	3372.39	13.3112	13.3384	13.0822	12.1778	11.9002	11.2106	11.5792	11.7196	12.9774	0.333824	0.360999	0.104819
736	Pavir.J08126.1	Pavir.J08126.1	943	39214	37	37	5	5	22.5	409847	1	1	1	993.856	2978.55	3	2978.55	-0.0058	0	83.79		31	3.1e-07	R	NNEAALAAAVAHQPVSVAINGADPAFR	F	Deamidated (NQ)	0.000000000000000000010000000.0	File842 Spectrum367413 scans: 19031	8493.74	9199.18	8742.75	6962.53	4938.42	2846.89	3125.46	3006.9	13.0522	13.1673	13.0939	12.7654	12.2698	11.4752	11.6099	11.5541	13.0197	0.0324988	0.147604	0.074187
736	Pavir.J08126.1	Pavir.J08126.1	943	39214	37	37	5	5	22.5	409905	1	1	1	994.186	2979.54	3	2979.54	-0.0003	0	77.11	18	31	1.5e-06	R	NNEAALAAAVAHQPVSVAINGADPAFR	F	2 Deamidated (NQ)	0.010000000000000000010000000.0	File837 Spectrum255024 scans: 19654	6605.48	6695.57	7865.4	4818.5	1325.1	1113.8	3098.25	2524.81	12.6894	12.709	12.9413	12.2344	10.3719	10.1213	11.5972	11.302	12.6435	0.045919	0.0654638	0.297777
748	Pavir.J03896.1	Pavir.J03896.1	929	85581	40	40	14	14	30.7	164888	1	1	1	809.422	1616.83	2	1616.83	-0.0013	0	57.77	22	27	4.8e-05	K	AEAPAEAAAEEVR	A			File844 Spectrum404807 scans: 8766	223554	231126	176051	196468	52520.8	90407	144331	63882.6	17.7703	17.8183	17.4256	17.5839	15.6806	16.4641	17.139	15.9631	17.6495	0.120726	0.16878	-0.223905
748	Pavir.J03896.1	Pavir.J03896.1	929	85581	40	40	14	14	30.7	164891	1	1	1	809.423	1616.83	2	1616.83	-0.0002	0	58.28	22	27	4.4e-05	K	AEAPAEAAAEEVR	A			File844 Spectrum404835 scans: 8796	128242	121517	111526	114221	30055.6	50840.8	82961.5	37390	16.9685	16.8908	16.767	16.8015	14.8753	15.6337	16.3402	15.1904	16.857	0.11156	0.0338492	-0.0899286
748	Pavir.J03896.1	Pavir.J03896.1	929	85581	40	40	14	14	30.7	78631	1	1	1	451.628	1351.86	3	1351.86	-0.0037	0	23.88		23	0.049	R	TALAQLK	E			File843 Spectrum383142 scans: 10647	113470	85681.9	95172.6	79496.1	56390.1	72393.3	66322	43264.8	16.792	16.3867	16.5383	16.2786	15.7832	16.1436	16.0172	15.4009	16.4989	0.293076	-0.112174	0.0393804
748	Pavir.J03896.1	Pavir.J03896.1	929	85581	40	40	14	14	30.7	78632	1	1	1	451.628	1351.86	3	1351.86	-0.0023	0	23.26		23	0.056	R	TALAQLK	E			File843 Spectrum383081 scans: 10582	91416.9	68655.6	80990.5	68050.3	64957.6	64298.7	61774.9	44587.8	16.4802	16.0671	16.3055	16.0543	15.9872	15.9725	15.9147	15.4444	16.2268	0.253412	-0.15967	0.0787044
748	Pavir.J03896.1	Pavir.J03896.1	929	85581	40	40	14	14	30.7	117907	1	1	1	494.958	1481.85	3	1481.86	-0.0034	0	36.1		30	0.013	K	AVEAVEEK	A			File828 Spectrum30614 scans: 9470	67831	39605.8	55619.1	31748.3	19742.8	35047.2	37002.3	12635.3	16.0497	15.2734	15.7633	14.9544	14.269	15.097	15.1753	13.6252	15.5102	0.539466	-0.236769	0.253102
748	Pavir.J03896.1	Pavir.J03896.1	929	85581	40	40	14	14	30.7	164887	1	1	1	539.95	1616.83	3	1616.83	-0.0017	0	68.46		27	4.3e-06	K	AEAPAEAAAEEVR	A			File844 Spectrum404806 scans: 8765	64776.4	262960	47211.4	21800.3	34380.3	37475.8	26816.3	16503.2	15.9832	18.0045	15.5268	14.4121	15.0693	15.1937	14.7108	14.0105	15.9816	0.00153806	2.02284	-0.454795
748	Pavir.J03896.1	Pavir.J03896.1	929	85581	40	40	14	14	30.7	117901	1	1	1	494.957	1481.85	3	1481.86	-0.0048	0	30.25	27	28	0.033	K	AVEAVEEK	A			File828 Spectrum30660 scans: 9519	49803	40701.9	56156.9	27281.7	16393.6	27789.1	39326.1	12321.3	15.6039	15.3128	15.7772	14.7356	14.0008	14.7622	15.2632	13.5889	15.3574	0.24655	-0.0445865	0.419782
748	Pavir.J03896.1	Pavir.J03896.1	929	85581	40	40	14	14	30.7	78633	1	1	1	676.939	1351.86	2	1351.86	-0.0012	0	27.67	26	27	0.046	R	TALAQLK	E			File843 Spectrum383099 scans: 10601	45860.5	34287.6	34999.7	30789	15731.4	19048.2	26084.4	12478.3	15.485	15.0654	15.0951	14.9101	13.9414	14.2174	14.6709	13.6071	15.1389	0.346078	-0.073488	-0.0438298
748	Pavir.J03896.1	Pavir.J03896.1	929	85581	40	40	14	14	30.7	164889	1	1	1	809.422	1616.83	2	1616.83	-0.001	0	69.77	23	27	3e-06	K	AEAPAEAAAEEVR	A			File844 Spectrum404719 scans: 8672	39690.3	37863.3	35612.6	32154.4	10225.1	14830.9	24833	12130.7	15.2765	15.2085	15.1201	14.9727	13.3198	13.8563	14.6	13.5664	15.1445	0.132038	0.0640513	-0.0243581
748	Pavir.J03896.1	Pavir.J03896.1	929	85581	40	40	14	14	30.7	117910	1	1	1	494.958	1481.85	3	1481.86	-0.0031	0	30.21	27	30	0.05	K	AVEAVEEK	A			File828 Spectrum30690 scans: 9551	32248.3	17705.6	28567.3	18614.1	11134.6	13323.6	14627.1	5656.16	14.9769	14.1119	14.8021	14.1841	13.4428	13.7017	13.8364	12.4656	14.5188	0.458175	-0.40684	0.283318
748	Pavir.J03896.1	Pavir.J03896.1	929	85581	40	40	14	14	30.7	164885	1	1	1	809.422	1616.83	2	1616.83	-0.0018	0	56.07	22	27	7.5e-05	K	AEAPAEAAAEEVR	A			File844 Spectrum404877 scans: 8840	21442.7	23987.8	20237.6	18968.6	5553.73	7282.86	13871	8242.63	14.3882	14.55	14.3048	14.2113	12.4392	12.8303	13.7598	13.0089	14.3636	0.0246274	0.186439	-0.0588203
748	Pavir.J03896.1	Pavir.J03896.1	929	85581	40	40	14	14	30.7	117909	1	1	1	494.958	1481.85	3	1481.86	-0.0032	0	32.64	28	30	0.029	K	AVEAVEEK	A			File828 Spectrum30545 scans: 9396	17528	12405.1	18319.1	8540.5	6015.8	10544	9610.37	4732.34	14.0974	13.5986	14.1611	13.0601	12.5545	13.3641	13.2304	12.2083	13.7293	0.368081	-0.13065	0.431761
748	Pavir.J03896.1	Pavir.J03896.1	929	85581	40	40	14	14	30.7	449834	1	1	1	775.82	3874.07	5	3874.07	-0.0069	0	35.14	21	30	0.018	K	QEAAPAAAAAAAEEKPAPAAEETAVAAVEEK	A			File830 Spectrum86256 scans: 16699	13204.7	4638.34	6558.23	4698.23	1691.38	3470.22	5470.79	2898.15	13.6888	12.1794	12.6791	12.1979	10.724	11.7608	12.4175	11.5009	12.6863	1.00248	-0.506894	-0.0071977
748	Pavir.J03896.1	Pavir.J03896.1	929	85581	40	40	14	14	30.7	277693	1	1	1	1016.04	2030.06	2	2030.06	-0.0012	0	59.31	24	29	5.8e-05	K	EELIWGVPLVGDDER	T			File841 Spectrum349752 scans: 24724	12083	14112.6	11524.7	10538.8	5599.07	5512.48	6706	6601.28	13.5607	13.7847	13.4924	13.3634	12.451	12.4285	12.7112	12.6885	13.5503	0.0103747	0.234386	-0.0578762
748	Pavir.J03896.1	Pavir.J03896.1	929	85581	40	40	14	14	30.7	449835	1	1	1	775.821	3874.07	5	3874.07	-0.002	0	54.4	19	30	0.00021	K	QEAAPAAAAAAAEEKPAPAAEETAVAAVEEK	A			File829 Spectrum62285 scans: 17151	8280.74	8871.49	5561	5787.12	4543.97	4330.08	6923.99	4495.77	13.0155	13.115	12.4411	12.4986	12.1497	12.0802	12.7574	12.1344	12.7676	0.247979	0.347394	-0.326437
748	Pavir.J03896.1	Pavir.J03896.1	929	85581	40	40	14	14	30.7	277692	1	1	1	1016.04	2030.06	2	2030.06	-0.0016	0	68.26	25	29	7.4e-06	K	EELIWGVPLVGDDER	T			File841 Spectrum349723 scans: 24693	7842.83	7664.86	8404.4	7634.1	4188.53	3546.85	4814.77	4194.19	12.9372	12.904	13.0369	12.8982	12.0322	11.7923	12.2332	12.0342	12.9441	-0.00693506	-0.0400506	0.0928364
748	Pavir.J03896.1	Pavir.J03896.1	929	85581	40	40	14	14	30.7	187215	1	1	1	562.958	1685.85	3	1685.86	-0.005	0	43.99	26	27	0.0012	K	AAEADSEEEK	K			File842 Spectrum353385 scans: 4006	5717.45	4039.32	4087.52	2973.64	1777.14	1697.82	2221.07	1281.46	12.4812	11.9799	11.997	11.538	10.7953	10.7295	11.117	10.3236	11.999	0.482137	-0.0191218	-0.00201095
764	Pavir.Ib01462.1	Pavir.Ib01462.1	908	20914	28	28	7	7	61.5	346037	1	1	1	808.446	2422.31	3	2422.31	0.0024	0	64.32	21	30	2.3e-05	K	LVAEVVASAHPVEGEGGVGSVR	Q			File845 Spectrum439232 scans: 20200	31645.6	45401.8	27655.6	12691.4	65524.1	88894.5	66193	69163.2	14.9497	15.4705	14.7553	13.6316	15.9997	16.4398	16.0144	16.0777	14.7018	0.247961	0.768703	0.0535275
764	Pavir.Ib01462.1	Pavir.Ib01462.1	908	20914	28	28	7	7	61.5	346028	1	1	1	808.443	2422.31	3	2422.31	-0.0035	0	65.83	19	31	1.7e-05	K	LVAEVVASAHPVEGEGGVGSVR	Q			File845 Spectrum439322 scans: 20296	25649	48842.6	29849.9	18292.4	54069.9	102990	64965	65889.4	14.6466	15.5759	14.8654	14.159	15.7225	16.6521	15.9874	16.0078	14.8117	-0.1651	0.764138	0.0537235
764	Pavir.Ib01462.1	Pavir.Ib01462.1	908	20914	28	28	7	7	61.5	346030	1	1	1	808.444	2422.31	3	2422.31	-0.0017	0	89.1	19	30	7.5e-08	K	LVAEVVASAHPVEGEGGVGSVR	Q			File845 Spectrum439292 scans: 20264	22409.7	31235.2	32778.2	16995.2	48745.2	106321	61559.6	65844.6	14.4518	14.9309	15.0004	14.0528	15.573	16.6981	15.9097	16.0068	14.609	-0.157167	0.321882	0.391449
764	Pavir.Ib01462.1	Pavir.Ib01462.1	908	20914	28	28	7	7	61.5	210462	1	1	1	589.674	1766	3	1766	-0.003	0	42.1	21	29	0.0026	K	VEPAADSGSVVK	V			File831 Spectrum101276 scans: 7720	13534.9	13139.8	16224.7	7001.89	6591.4	61296.6	11001.8	9200.08	13.7244	13.6817	13.9859	12.7735	12.6864	15.9035	13.4255	13.1674	13.5414	0.183024	0.140285	0.444532
764	Pavir.Ib01462.1	Pavir.Ib01462.1	908	20914	28	28	7	7	61.5	370400	1	1	1	873.502	2617.49	3	2617.49	-0.0047	0	107.12	21	29	8.9e-10	K	STLVEGGGIGVAIETAASHIK	V			File846 Spectrum467422 scans: 24629	8937.61	8131.66	10955.1	7827.96	18208.2	17201.3	19510.3	14317	13.1257	12.9893	13.4193	12.9344	14.1523	14.0702	14.2519	13.8054	13.1172	0.00848653	-0.127853	0.302132
764	Pavir.Ib01462.1	Pavir.Ib01462.1	908	20914	28	28	7	7	61.5	370405	1	1	1	873.503	2617.49	3	2617.49	-0.004	0	105.59	21	29	1.3e-09	K	STLVEGGGIGVAIETAASHIK	V			File827 Spectrum20159 scans: 24637	5971	4753.89	6391.29	5888.81	17015	20745.5	15820.2	12803.4	12.5438	12.2149	12.6419	12.5238	14.0545	14.3405	13.9495	13.6442	12.4811	0.0626819	-0.266182	0.160816
764	Pavir.Ib01462.1	Pavir.Ib01462.1	908	20914	28	28	7	7	61.5	370401	1	1	1	873.502	2617.49	3	2617.49	-0.0045	0	86.58	21	29	1e-07	K	STLVEGGGIGVAIETAASHIK	V			File846 Spectrum467438 scans: 24646	5862.24	6906.01	6695.88	6778.77	10838.6	12239.1	12290.8	11278.7	12.5172	12.7536	12.7091	12.7268	13.4039	13.5792	13.5853	13.4613	12.6767	-0.159449	0.0769519	0.032373
764	Pavir.Ib01462.1	Pavir.Ib01462.1	908	20914	28	28	7	7	61.5	370399	1	1	1	873.501	2617.48	3	2617.49	-0.0091	0	78.88	23	29	6.2e-07	K	STLVEGGGIGVAIETAASHIK	V			File846 Spectrum467259 scans: 24455	5354.56	8397.61	7631.4	4900.27	18208.6	23946.8	16815.1	13790	12.3866	13.0358	12.8977	12.2586	14.1523	14.5475	14.0375	13.7513	12.6447	-0.25812	0.391089	0.253059
764	Pavir.Ib01462.1	Pavir.Ib01462.1	908	20914	28	28	7	7	61.5	211769	1	1	1	885.454	1768.89	2	1768.89	-0.0001	0	67.73	17	28	5.8e-06	K	AAEAFLVANPDAYN	-			File843 Spectrum391919 scans: 20009	4129.21	6452.12	3152.09	3793.33	4781.54	4670.82	3592.67	4677.4	12.0116	12.6556	11.6221	11.8892	12.2233	12.1895	11.8108	12.1915	12.0446	-0.0329888	0.610921	-0.422543
764	Pavir.Ib01462.1	Pavir.Ib01462.1	908	20914	28	28	7	7	61.5	211772	1	1	1	885.454	1768.89	2	1768.89	0.0003	0	51.89		28	0.00023	K	AAEAFLVANPDAYN	-			File843 Spectrum391897 scans: 19985	3973.7	3980.61	3019.99	3054.16	3545.61	4812.9	2919.87	3485.63	11.9563	11.9588	11.5603	11.5766	11.7918	12.2327	11.5117	11.7672	11.763	0.193285	0.195793	-0.202655
764	Pavir.Ib01462.1	Pavir.Ib01462.1	908	20914	28	28	7	7	61.5	211766	1	1	1	885.453	1768.89	2	1768.89	-0.0013	0	53.61	17	28	0.00016	K	AAEAFLVANPDAYN	-			File841 Spectrum345847 scans: 20559	3812.5	7875.01	8184.32	7062.5	8612.23	10468.2	5824.35	6661.82	11.8965	12.9431	12.9986	12.786	13.0722	13.3537	12.5079	12.7017	12.656	-0.759527	0.287016	0.342598
764	Pavir.Ib01462.1	Pavir.Ib01462.1	908	20914	28	28	7	7	61.5	211760	1	1	1	885.452	1768.89	2	1768.89	-0.0036	0	51.55		28	0.00024	K	AAEAFLVANPDAYN	-			File843 Spectrum391909 scans: 19998	2471.38	4654.72	2901.51	3269.46	3364.48	4894.17	4158.71	4313.03	11.2711	12.1845	11.5026	11.6748	11.7162	12.2568	12.0219	12.0745	11.6583	-0.387148	0.526227	-0.155664
795	Pavir.Ha00121.1	Pavir.Ha00121.1	878	59500	38	38	6	6	18.1	150208	1	1	1	526.343	1576.01	3	1576.02	-0.0095	0	44.01	23	26	0.00084	R	SLAALGLPVK	T			File832 Spectrum135103 scans: 18815	299764	273212	256484	506014	609768	453993	600230	414934	18.1935	18.0597	17.9685	18.9488	19.2179	18.7923	19.1952	18.6625	18.2926	-0.0991458	-0.232951	-0.324105
795	Pavir.Ha00121.1	Pavir.Ha00121.1	878	59500	38	38	6	6	18.1	150217	1	1	1	526.344	1576.01	3	1576.02	-0.0066	0	41.67	21	25	0.0013	R	SLAALGLPVK	T			File831 Spectrum112118 scans: 19285	165592	106470	80219.4	146369	321737	297061	270625	201357	17.3373	16.7001	16.2917	17.1592	18.2955	18.1804	18.0459	17.6194	16.8721	0.465209	-0.171984	-0.580404
795	Pavir.Ha00121.1	Pavir.Ha00121.1	878	59500	38	38	6	6	18.1	150204	1	1	1	526.343	1576.01	3	1576.02	-0.0104	0	46.59	24	25	0.00043	R	SLAALGLPVK	T			File832 Spectrum135013 scans: 18719	109275	49547.4	46905.1	97677.8	170118	191673	117943	105331	16.7376	15.5965	15.5175	16.5757	17.3762	17.5483	16.8477	16.6846	16.1068	0.63077	-0.510309	-0.589373
795	Pavir.Ha00121.1	Pavir.Ha00121.1	878	59500	38	38	6	6	18.1	150205	1	1	1	526.343	1576.01	3	1576.02	-0.0103	0	45.97	23	25	0.00049	R	SLAALGLPVK	T			File832 Spectrum135164 scans: 18880	46769.3	15149	34503	47086.4	56924.8	66479.3	78890.5	60048.3	15.5133	13.8869	15.0744	15.523	15.7968	16.0206	16.2676	15.8738	14.9994	0.513859	-1.11248	0.0750193
795	Pavir.Ha00121.1	Pavir.Ha00121.1	878	59500	38	38	6	6	18.1	150225	1	1	1	789.014	1576.01	2	1576.02	-0.0037	0	56.71	24	25	4.1e-05	R	SLAALGLPVK	T			File831 Spectrum112088 scans: 19253	45266.2	32622.2	36710.4	51025.1	92313.7	99294.2	75030.6	63344.5	15.4661	14.9936	15.1639	15.6389	16.4943	16.5994	16.1952	15.9509	15.3156	0.150513	-0.322067	-0.151732
795	Pavir.Ha00121.1	Pavir.Ha00121.1	878	59500	38	38	6	6	18.1	237311	1	1	1	622.358	1864.05	3	1864.06	-0.0037	0	41.75	18	30	0.0034	R	TAQDAYTFLVK	W			File843 Spectrum388962 scans: 16855	37201.2	95650.5	123112	65761.5	110625	288787	516788	103179	15.1831	16.5455	16.9096	16.005	16.7553	18.1396	18.9792	16.6548	16.1608	-0.977716	0.384707	0.748831
795	Pavir.Ha00121.1	Pavir.Ha00121.1	878	59500	38	38	6	6	18.1	237309	1	1	1	622.358	1864.05	3	1864.06	-0.0039	0	41.69		30	0.0035	R	TAQDAYTFLVK	W			File843 Spectrum389036 scans: 16934	36402.5	39464.9	63580.6	21755.4	54017.1	177142	271685	66864.8	15.1518	15.2683	15.9563	14.4091	15.7211	17.4345	18.0516	16.029	15.1964	-0.0446047	0.0719281	0.759944
795	Pavir.Ha00121.1	Pavir.Ha00121.1	878	59500	38	38	6	6	18.1	150213	1	1	1	789.012	1576.01	2	1576.02	-0.0087	0	52.5	24	25	0.00011	R	SLAALGLPVK	T			File832 Spectrum135010 scans: 18715	31274.7	27737.5	31491.7	42014.6	65853.5	73669.9	64956.3	55474.1	14.9327	14.7596	14.9427	15.3586	16.007	16.1688	15.9872	15.7595	14.9984	-0.0656798	-0.238834	-0.0557017
795	Pavir.Ha00121.1	Pavir.Ha00121.1	878	59500	38	38	6	6	18.1	150223	1	1	1	526.345	1576.01	3	1576.02	-0.0048	0	41.96	21	25	0.0012	R	SLAALGLPVK	T			File831 Spectrum112043 scans: 19205	27468.1	17056.9	18892.5	35883.5	45100.5	55188.6	35000.8	30607.1	14.7455	14.0581	14.2055	15.131	15.4609	15.7521	15.0951	14.9016	14.535	0.210446	-0.476959	-0.329497
795	Pavir.Ha00121.1	Pavir.Ha00121.1	878	59500	38	38	6	6	18.1	237308	1	1	1	622.358	1864.05	3	1864.06	-0.004	0	44.7	16	30	0.0017	R	TAQDAYTFLVK	W			File843 Spectrum388886 scans: 16774	22490.5	44070.6	63831.7	31427.6	30352.9	135577	202935	50058.9	14.457	15.4275	15.962	14.9397	14.8895	17.0488	17.6307	15.6113	15.1966	-0.739544	0.230957	0.765415
795	Pavir.Ha00121.1	Pavir.Ha00121.1	878	59500	38	38	6	6	18.1	150222	1	1	1	789.014	1576.01	2	1576.02	-0.0049	0	56.55	24	25	4.1e-05	R	SLAALGLPVK	T			File831 Spectrum112062 scans: 19225	20997.3	18449.4	18115.3	27773.7	46664.1	49422.1	40653.8	33959.4	14.3579	14.1713	14.1449	14.7614	15.51	15.5929	15.3111	15.0515	14.3589	-0.00097221	-0.187604	-0.213968
795	Pavir.Ha00121.1	Pavir.Ha00121.1	878	59500	38	38	6	6	18.1	237306	1	1	1	933.033	1864.05	2	1864.06	-0.0043	0	57.59		30	8.8e-05	R	TAQDAYTFLVK	W			File843 Spectrum389012 scans: 16908	18036.4	26121.1	34511.9	21486	25533.4	74284.7	133379	33589.4	14.1386	14.6729	15.0748	14.3911	14.6401	16.1808	17.0252	15.0357	14.5694	-0.43074	0.103563	0.505438
795	Pavir.Ha00121.1	Pavir.Ha00121.1	878	59500	38	38	6	6	18.1	150209	1	1	1	789.011	1576.01	2	1576.02	-0.0092	0	48.96	25	25	0.00024	R	SLAALGLPVK	T			File832 Spectrum135170 scans: 18886	17157.4	16184.8	17089.5	19016.5	35379.4	32396.5	28973.7	33241.8	14.0665	13.9824	14.0608	14.215	15.1106	14.9835	14.8225	15.0207	14.0812	-0.0146276	-0.0988161	-0.0203475
795	Pavir.Ha00121.1	Pavir.Ha00121.1	878	59500	38	38	6	6	18.1	237310	1	1	1	622.358	1864.05	3	1864.06	-0.0039	0	38.48		30	0.0072	R	TAQDAYTFLVK	W			File843 Spectrum388843 scans: 16728	16299.8	29942.7	35477.2	22500	20955.3	59617.7	108811	44004.8	13.9926	14.8699	15.1146	14.4576	14.355	15.8635	16.7315	15.4254	14.6087	-0.616116	0.261235	0.505926
795	Pavir.Ha00121.1	Pavir.Ha00121.1	878	59500	38	38	6	6	18.1	150224	1	1	1	789.014	1576.01	2	1576.02	-0.0038	0	48.56	22	25	0.00027	R	SLAALGLPVK	T			File831 Spectrum112184 scans: 19355	15650.9	15179.6	14614.1	20024.2	38035.5	35366.3	27690.8	27456.7	13.934	13.8898	13.8351	14.2895	15.2151	15.1101	14.7571	14.7449	13.9871	-0.0531259	-0.0972395	-0.152008
795	Pavir.Ha00121.1	Pavir.Ha00121.1	878	59500	38	38	6	6	18.1	150207	1	1	1	526.343	1576.01	3	1576.02	-0.0099	0	40.46	21	26	0.0019	R	SLAALGLPVK	T			File832 Spectrum135196 scans: 18914	12184	6594.34	10530.1	14305.3	23198.8	18328.2	20419.3	17601.9	13.5727	12.687	13.3622	13.8043	14.5018	14.1618	14.3176	14.1034	13.3566	0.21615	-0.669542	0.0056835
795	Pavir.Ha00121.1	Pavir.Ha00121.1	878	59500	38	38	6	6	18.1	318312	1	1	1	1121.58	2241.15	2	2241.16	-0.0053	0	66.31		29	1.2e-05	K	VWVFSGDTDTAVPLSSTR	R			File830 Spectrum90778 scans: 21522	10862	10555.7	5677.73	9673.63	8759.25	12573.5	11500.3	20124.5	13.407	13.3657	12.4711	13.2398	13.0966	13.6181	13.4894	14.2967	13.1209	0.286083	0.244814	-0.64982
795	Pavir.Ha00121.1	Pavir.Ha00121.1	878	59500	38	38	6	6	18.1	237314	1	1	1	933.034	1864.05	2	1864.06	-0.002	0	53.83	19	29	0.0002	R	TAQDAYTFLVK	W			File843 Spectrum388909 scans: 16798	10806.8	20416.4	25919.1	13572.4	18479	53353.6	90757.3	24149.4	13.3997	14.3174	14.6617	13.7284	14.1736	15.7033	16.4697	14.5597	14.0268	-0.627145	0.290636	0.634923
795	Pavir.Ha00121.1	Pavir.Ha00121.1	878	59500	38	38	6	6	18.1	150211	1	1	1	789.011	1576.01	2	1576.02	-0.0089	0	44.03	22	25	0.00074	R	SLAALGLPVK	T			File832 Spectrum135190 scans: 18907	10613.8	9869.77	8910.93	11889.7	18424.3	17325.4	16402.3	17086.2	13.3737	13.2688	13.1214	13.5374	14.1693	14.0806	14.0016	14.0605	13.3253	0.0483453	-0.0565088	-0.203948
795	Pavir.Ha00121.1	Pavir.Ha00121.1	878	59500	38	38	6	6	18.1	237317	1	1	1	933.036	1864.06	2	1864.06	0.0024	0	59.24	18	29	5.8e-05	R	TAQDAYTFLVK	W			File843 Spectrum388898 scans: 16786	7933.86	14976.1	18881.6	12673	14607.5	43470.6	74983.4	21851	12.9538	13.8704	14.2047	13.6295	13.8344	15.4078	16.1943	14.4154	13.6646	-0.710778	0.205785	0.540105
795	Pavir.Ha00121.1	Pavir.Ha00121.1	878	59500	38	38	6	6	18.1	150226	1	1	1	526.345	1576.01	3	1576.02	-0.0031	0	46.12	23	25	0.00047	R	SLAALGLPVK	T			File831 Spectrum112225 scans: 19399	7671.6	5011.83	5152.88	7173.52	12198.2	13632.2	11464.1	8084.55	12.9053	12.2911	12.3312	12.8085	13.5744	13.7347	13.4848	12.981	12.584	0.321297	-0.292894	-0.252852
795	Pavir.Ha00121.1	Pavir.Ha00121.1	878	59500	38	38	6	6	18.1	402648	1	1	1	971.147	2910.42	3	2910.42	-0.0062	0	53.47	20	30	0.00024	K	ATEEQGNIDVYSIYTPPCEK	G	Methylthio (C)	0.00000000000000000200.0	File837 Spectrum254677 scans: 19284	5323.4	5718.83	5576.72	7581.23	4797.11	16483.2	17235.9	14036.7	12.3781	12.4815	12.4452	12.8882	12.2279	14.0087	14.0731	13.7769	12.5483	-0.170131	-0.0667587	-0.103063
795	Pavir.Ha00121.1	Pavir.Ha00121.1	878	59500	38	38	6	6	18.1	150219	1	1	1	526.344	1576.01	3	1576.02	-0.0062	0	43.52	21	25	0.00083	R	SLAALGLPVK	T			File833 Spectrum159225 scans: 19326	4939.12	3615.42	2774.7	2671.35	5904.02	5849.28	5201.06	5634.85	12.27	11.8199	11.4381	11.3834	12.5275	12.514	12.3446	12.4602	11.7279	0.542175	0.0920852	-0.289749
795	Pavir.Ha00121.1	Pavir.Ha00121.1	878	59500	38	38	6	6	18.1	402645	1	1	1	971.146	2910.41	3	2910.42	-0.0092	0	40.47	16	30	0.0046	K	ATEEQGNIDVYSIYTPPCEK	G	Methylthio (C)	0.00000000000000000200.0	File837 Spectrum254564 scans: 19163	3978.11	4293.39	2872.7	4131.01	3489.47	8855.69	7802.19	4139.25	11.9579	12.0679	11.4882	12.0123	11.7688	13.1124	12.9297	12.0152	11.8816	0.0763078	0.18634	-0.393367
795	Pavir.Ha00121.1	Pavir.Ha00121.1	878	59500	38	38	6	6	18.1	367431	1	1	1	649.358	2593.4	4	2593.41	-0.0074	0	34.99	16	31	0.02	R	VHTDGQTLLLNEFAWNK	A			File846 Spectrum463991 scans: 20969	3839.67	3383.72	3848.54	1971.6	4094.67	14060.4	8949.81	9327.89	11.9068	11.7244	11.9101	10.9451	11.9995	13.7793	13.1276	13.1873	11.6216	0.285166	0.102792	0.288494
795	Pavir.Ha00121.1	Pavir.Ha00121.1	878	59500	38	38	6	6	18.1	150218	1	1	1	526.344	1576.01	3	1576.02	-0.0064	0	46.18	23	25	0.00045	R	SLAALGLPVK	T			File833 Spectrum159150 scans: 19246	3451.12	4426.72	2759.72	3159.79	4740.87	6001.08	4980.92	5998.1	11.7529	12.112	11.4303	11.6256	12.2109	12.551	12.2822	12.5503	11.7302	0.0226521	0.381823	-0.299892
795	Pavir.Ha00121.1	Pavir.Ha00121.1	878	59500	38	38	6	6	18.1	237312	1	1	1	622.358	1864.05	3	1864.06	-0.0037	0	44.29		30	0.0019	R	TAQDAYTFLVK	W			File843 Spectrum388741 scans: 16619	3036.59	4426.57	5558.06	4036.7	4068.97	8363.51	14584.8	5931.96	11.5682	12.112	12.4404	11.979	11.9904	13.0299	13.8322	12.5343	12.0249	-0.456648	0.08709	0.415482
795	Pavir.Ha00121.1	Pavir.Ha00121.1	878	59500	38	38	6	6	18.1	402644	1	1	1	728.611	2910.41	4	2910.42	-0.0105	0	35.23	18	30	0.015	K	ATEEQGNIDVYSIYTPPCEK	G	Methylthio (C)	0.00000000000000000200.0	File837 Spectrum254586 scans: 19187	2861.65	5650	3495.49	5185.83	3542.71	7648.78	5584.88	5257.03	11.4826	12.464	11.7713	12.3404	11.7906	12.901	12.4473	12.36	12.0146	-0.531945	0.449458	-0.243297
795	Pavir.Ha00121.1	Pavir.Ha00121.1	878	59500	38	38	6	6	18.1	150221	1	1	1	526.345	1576.01	3	1576.02	-0.0053	0	38.6	21	25	0.0025	R	SLAALGLPVK	T			File833 Spectrum159244 scans: 19346	2853.4	4023.1	1505.27	4218.3	4998.57	3820.52	3336.99	4728.97	11.4785	11.9741	10.5558	12.0424	12.2873	11.8996	11.7043	12.2073	11.5127	-0.0342376	0.46139	-0.956897
795	Pavir.Ha00121.1	Pavir.Ha00121.1	878	59500	38	38	6	6	18.1	237316	1	1	1	622.359	1864.06	3	1864.06	0.0003	0	36.02		29	0.012	R	TAQDAYTFLVK	W			File843 Spectrum388734 scans: 16611	2086.12	2897.54	3213.61	2700.53	2969.43	5827.25	7925.52	2977.75	11.0266	11.5006	11.65	11.399	11.536	12.5086	12.9523	11.54	11.3941	-0.367452	0.106558	0.255925
795	Pavir.Ha00121.1	Pavir.Ha00121.1	878	59500	38	38	6	6	18.1	402649	1	1	1	971.148	2910.42	3	2910.42	-0.002	0	35.9	15	30	0.014	K	ATEEQGNIDVYSIYTPPCEK	G	Methylthio (C)	0.00000000000000000200.0	File837 Spectrum254734 scans: 19344	1922.93	3168.37	2542.66	1811.29	1726.48	5213.18	4445.79	3238.98	10.9091	11.6295	11.3121	10.8228	10.7536	12.3479	12.1182	11.6613	11.1684	-0.259293	0.461139	0.143736
795	Pavir.Ha00121.1	Pavir.Ha00121.1	878	59500	38	38	6	6	18.1	150206	1	1	1	395.009	1576.01	4	1576.02	-0.0099	0	28.24	16	26	0.032	R	SLAALGLPVK	T			File832 Spectrum135049 scans: 18757	1794.81	706.225	1621.25	3195.93	5974.17	4455.31	3646.52	3010.26	10.8096	9.46398	10.6629	11.642	12.5445	12.1213	11.8323	11.5557	10.6446	0.164988	-1.18064	0.018262
795	Pavir.Ha00121.1	Pavir.Ha00121.1	878	59500	38	38	6	6	18.1	150216	1	1	1	395.01	1576.01	4	1576.02	-0.008	0	32.86		25	0.0097	R	SLAALGLPVK	T			File832 Spectrum135123 scans: 18836	1791.16	1254.45	864.701	1486.35	2543.21	2164.13	2225.99	2081.96	10.8067	10.2928	9.75606	10.5376	11.3124	11.0796	11.1202	11.0237	10.3483	0.458396	-0.0554442	-0.592226
795	Pavir.Ha00121.1	Pavir.Ha00121.1	878	59500	38	38	6	6	18.1	150215	1	1	1	395.01	1576.01	4	1576.02	-0.0082	0	34.86	15	25	0.0061	R	SLAALGLPVK	T			File831 Spectrum112098 scans: 19263	1015.07	543.084	775.453	886.259	1726.69	1761.97	1438.84	1207.47	9.98737	9.08503	9.5989	9.79159	10.7538	10.783	10.4907	10.2378	9.61572	0.371647	-0.530687	-0.0168243
808	Pavir.J00892.1	Pavir.J00892.1	863	18196	33	33	5	5	49.7	298736	1	1	1	710.079	2127.22	3	2127.22	-0.0035	0	42.46	17	29	0.0026	K	IVFVSWSPATADVK	S			File834 Spectrum186367 scans: 22730	25499.1	67412.6	12383.7	3544.76	55559.1	99798.5	70345.5	100779	14.6382	16.0407	13.5962	11.7915	15.7617	16.6067	16.1022	16.6208	14.0166	0.621531	2.0241	-0.420475
808	Pavir.J00892.1	Pavir.J00892.1	863	18196	33	33	5	5	49.7	298743	1	1	1	710.08	2127.22	3	2127.22	-0.002	0	36	18	29	0.011	K	IVFVSWSPATADVK	S			File834 Spectrum186116 scans: 22462	20156.5	72890.1	17812.7	12893	39522.5	82175.4	42715	56987.6	14.299	16.1534	14.1206	13.6543	15.2704	16.3264	15.3825	15.7984	14.5568	-0.257871	1.59661	-0.436207
808	Pavir.J00892.1	Pavir.J00892.1	863	18196	33	33	5	5	49.7	298741	1	1	1	1064.62	2127.22	2	2127.22	-0.0028	0	36.77	17	29	0.0096	K	IVFVSWSPATADVK	S			File834 Spectrum186165 scans: 22514	9263.49	3147.37	16374.9	6522.84	60034.7	109613	67725.3	78995.6	13.1773	11.6199	13.9992	12.6713	15.8735	16.7421	16.0474	16.2695	12.8669	0.310402	-1.24701	1.13226
808	Pavir.J00892.1	Pavir.J00892.1	863	18196	33	33	5	5	49.7	298738	1	1	1	1064.62	2127.22	2	2127.22	-0.0033	0	56	17	29	0.00012	K	IVFVSWSPATADVK	S			File834 Spectrum186252 scans: 22607	8488.76	5111.71	12621.8	5458.41	50357.2	103736	65616.9	86518.4	13.0513	12.3196	13.6236	12.4143	15.6199	16.6626	16.0018	16.4007	12.8522	0.199132	-0.532616	0.771424
808	Pavir.J00892.1	Pavir.J00892.1	863	18196	33	33	5	5	49.7	298745	1	1	1	1064.62	2127.22	2	2127.22	-0.0009	0	38.65	15	29	0.0062	K	IVFVSWSPATADVK	S			File834 Spectrum186405 scans: 22770	7642.88	7264.03	9242.39	6496.67	30307.9	51772.3	35427.1	46078.9	12.8999	12.8266	13.1741	12.6655	14.8874	15.6599	15.1126	15.4918	12.8915	0.0084021	-0.0649428	0.282553
808	Pavir.J00892.1	Pavir.J00892.1	863	18196	33	33	5	5	49.7	298731	1	1	1	1064.61	2127.21	2	2127.22	-0.0045	0	45.52	16	29	0.0013	K	IVFVSWSPATADVK	S			File834 Spectrum186236 scans: 22590	7307.49	2381.85	13255	6725.68	57322	98496.8	58764.3	74802.5	12.8352	11.2179	13.6943	12.7155	15.8068	16.5878	15.8427	16.1908	12.6157	0.219476	-1.39782	1.07857
808	Pavir.J00892.1	Pavir.J00892.1	863	18196	33	33	5	5	49.7	298742	1	1	1	1064.62	2127.22	2	2127.22	-0.0026	0	51.74	17	29	0.00031	K	IVFVSWSPATADVK	S			File834 Spectrum186295 scans: 22653	6968.02	8495.77	12999.7	4735.24	51483.4	95326.1	61332.7	69992.8	12.7665	13.0525	13.6662	12.2092	15.6518	16.5406	15.9044	16.0949	12.9236	-0.157086	0.128911	0.742571
808	Pavir.J00892.1	Pavir.J00892.1	863	18196	33	33	5	5	49.7	298730	1	1	1	1064.61	2127.21	2	2127.22	-0.0052	0	51.99	18	29	0.0003	K	IVFVSWSPATADVK	S			File834 Spectrum186324 scans: 22684	6831.31	5431.97	11611.6	8051.04	43389	82482.4	56389.7	68826.8	12.7379	12.4073	13.5033	12.975	15.405	16.3318	15.7831	16.0707	12.9059	-0.167915	-0.498601	0.597419
808	Pavir.J00892.1	Pavir.J00892.1	863	18196	33	33	5	5	49.7	298728	1	1	1	1064.61	2127.21	2	2127.22	-0.006	0	61.73	20	29	3.2e-05	K	IVFVSWSPATADVK	S			File834 Spectrum186229 scans: 22582	6481.01	8153.56	12553.9	8469.07	55710.9	98449.4	61261.1	77504.5	12.662	12.9932	13.6158	13.048	15.7657	16.5871	15.9027	16.242	13.0798	-0.41776	-0.0865493	0.536084
808	Pavir.J00892.1	Pavir.J00892.1	863	18196	33	33	5	5	49.7	298727	1	1	1	1064.61	2127.21	2	2127.22	-0.0072	0	47.21	18	29	0.0009	K	IVFVSWSPATADVK	S			File834 Spectrum186184 scans: 22534	6449.58	7695.75	13571	6771.79	57362.1	124729	69904	78849.8	12.655	12.9098	13.7282	12.7253	15.8078	16.9284	16.0931	16.2668	13.0046	-0.349611	-0.094754	0.723643
808	Pavir.J00892.1	Pavir.J00892.1	863	18196	33	33	5	5	49.7	298729	1	1	1	1064.61	2127.21	2	2127.22	-0.0057	0	41.27	18	29	0.0036	K	IVFVSWSPATADVK	S			File834 Spectrum186212 scans: 22564	6361.61	1433.66	9111.68	5913.05	42316	86044.4	55675.3	62178.5	12.6352	10.4855	13.1535	12.5297	15.3689	16.3928	15.7647	15.9241	12.201	0.434214	-1.71548	0.952539
808	Pavir.J00892.1	Pavir.J00892.1	863	18196	33	33	5	5	49.7	298746	1	1	1	1064.62	2127.22	2	2127.22	0.0023	0	43.17	16	29	0.002	K	IVFVSWSPATADVK	S			File834 Spectrum186393 scans: 22757	5665.62	5793.22	8119.71	5730.9	32603	55163.3	35124.4	48096.9	12.468	12.5001	12.9872	12.4845	14.9927	15.7514	15.1002	15.5537	12.61	-0.141962	-0.109833	0.37723
808	Pavir.J00892.1	Pavir.J00892.1	863	18196	33	33	5	5	49.7	298739	1	1	1	1064.62	2127.22	2	2127.22	-0.0033	0	53.94	16	29	0.00019	K	IVFVSWSPATADVK	S			File834 Spectrum186344 scans: 22705	5034.25	5161.85	11489.2	6285.45	44363.7	71417.7	45587.3	56045.8	12.2976	12.3337	13.488	12.6178	15.4371	16.124	15.4763	15.7743	12.6843	-0.386695	-0.350585	0.803738
808	Pavir.J00892.1	Pavir.J00892.1	863	18196	33	33	5	5	49.7	283129	1	1	1	1029.5	2056.99	2	2056.99	-0.0008	0	73.53		27	1.1e-06	R	DAVFGDLTASLPADGCR	Y	Methylthio (C)	0.00000000000000020.0	File844 Spectrum418802 scans: 23694	4874.1	3744.69	11726.4	2484.79	2714.68	78067.2	5378.39	32199.2	12.2509	11.8706	13.5175	11.2789	11.4066	16.2524	12.393	14.9747	12.2295	0.0214379	-0.358851	1.28799
808	Pavir.J00892.1	Pavir.J00892.1	863	18196	33	33	5	5	49.7	283131	1	1	1	1029.5	2056.99	2	2056.99	-0.0003	0	70.05		27	2.5e-06	R	DAVFGDLTASLPADGCR	Y	Methylthio (C)	0.00000000000000020.0	File844 Spectrum418820 scans: 23713	4658.88	4560.46	12336.6	2963.4	4054.25	97394.4	7611.04	36526.8	12.1858	12.155	13.5907	11.533	11.9852	16.5716	12.8939	15.1567	12.3661	-0.180341	-0.211142	1.22455
808	Pavir.J00892.1	Pavir.J00892.1	863	18196	33	33	5	5	49.7	298732	1	1	1	1064.61	2127.21	2	2127.22	-0.0045	0	56.3	18	29	0.00011	K	IVFVSWSPATADVK	S			File834 Spectrum186285 scans: 22642	4432.16	5687.62	8109.06	6410.51	46276	87308.8	49783.4	65956.7	12.1138	12.4736	12.9853	12.6462	15.498	16.4138	15.6034	16.0092	12.5547	-0.440942	-0.0811267	0.430583
808	Pavir.J00892.1	Pavir.J00892.1	863	18196	33	33	5	5	49.7	298734	1	1	1	1064.61	2127.22	2	2127.22	-0.0038	0	46.7	19	29	0.00099	K	IVFVSWSPATADVK	S			File834 Spectrum186317 scans: 22676	3783.77	3729.84	12477.6	6207.29	45365.7	78289.3	52211.3	64420.8	11.8856	11.8649	13.6071	12.5997	15.4693	16.2565	15.6721	15.9752	12.4893	-0.603718	-0.624429	1.11773
808	Pavir.J00892.1	Pavir.J00892.1	863	18196	33	33	5	5	49.7	298737	1	1	1	1064.62	2127.22	2	2127.22	-0.0033	0	43.91	16	29	0.0019	K	IVFVSWSPATADVK	S			File834 Spectrum186376 scans: 22739	3473.58	3414.45	9135.86	7528.37	34088.9	61949.3	38232.4	51045.5	11.7622	11.7374	13.1573	12.8781	15.057	15.9188	15.2225	15.6395	12.3838	-0.621567	-0.646336	0.773552
808	Pavir.J00892.1	Pavir.J00892.1	863	18196	33	33	5	5	49.7	283133	1	1	1	1029.5	2056.99	2	2056.99	0.0048	0	84.92		27	8.9e-08	R	DAVFGDLTASLPADGCR	Y	Methylthio (C)	0.00000000000000020.0	File844 Spectrum418895 scans: 23793	3334.11	5691.51	8639.22	3161	5432.25	53030	5668.2	21256.8	11.7031	12.4746	13.0767	11.6262	12.4073	15.6945	12.4687	14.3756	12.2201	-0.517047	0.254462	0.856553
808	Pavir.J00892.1	Pavir.J00892.1	863	18196	33	33	5	5	49.7	283132	1	1	1	1029.5	2056.99	2	2056.99	0.0002	0	59.55		27	2.8e-05	R	DAVFGDLTASLPADGCR	Y	Methylthio (C)	0.00000000000000020.0	File844 Spectrum418884 scans: 23781	3092.72	1046.21	12927.2	1595.58	4169.84	68790	7548.69	26391.7	11.5947	10.031	13.6581	10.6399	12.0258	16.0699	12.882	14.6878	11.4809	0.113759	-1.44995	2.17722
808	Pavir.J00892.1	Pavir.J00892.1	863	18196	33	33	5	5	49.7	390396	1	1	1	939.452	2815.33	3	2815.34	-0.0026	0	56.82		28	7.5e-05	R	YAVYDHDFTVGDATAQGSAAEAPR	S			File836 Spectrum228559 scans: 14982	2940.36	3265.48	6502.32	1833.88	2307.42	19212.4	2872.59	10310	11.5218	11.6731	12.6667	10.8407	11.1721	14.2297	11.4881	13.3318	11.6756	-0.153794	-0.00249082	0.991169
826	Pavir.Bb03603.1	Pavir.Bb03603.1	849	36559	28	28	7	7	28.3	351511	1	1	1	822.414	2464.22	3	2464.21	0.0052	0	40.72		29	0.0037	K	GLLHSDQELFNGGSTDNTVR	N	Deamidated (NQ)	0.00000000001000000000.0	File838 Spectrum272897 scans: 14946	17788.3	13847	22967.6	11693.8	7125.78	9102.79	8366.7	12355	14.1186	13.7573	14.4873	13.5135	12.7988	13.1521	13.0304	13.5928	13.9692	0.149469	-0.211885	0.51814
826	Pavir.Bb03603.1	Pavir.Bb03603.1	849	36559	28	28	7	7	28.3	109149	1	1	1	485.97	1454.89	3	1454.89	-0.0044	0	33.97		25	0.0071	K	SAVTAAVTK	E			File837 Spectrum242753 scans: 6565	16211.1	39979.6	26035.4	33459.8	10088.7	15011.6	16082.5	13498.5	13.9847	15.287	14.6682	15.0301	13.3005	13.8738	13.9732	13.7205	14.7425	-0.757804	0.544477	-0.074314
826	Pavir.Bb03603.1	Pavir.Bb03603.1	849	36559	28	28	7	7	28.3	109148	1	1	1	485.969	1454.89	3	1454.89	-0.0052	0	40.04	21	25	0.0017	K	SAVTAAVTK	E			File837 Spectrum242711 scans: 6520	9779.43	18746	13605.1	15568	5602.47	7518.3	8756.32	7473.53	13.2555	14.1943	13.7319	13.9263	12.4518	12.8762	13.0961	12.8676	13.777	-0.521461	0.417298	-0.0451385
826	Pavir.Bb03603.1	Pavir.Bb03603.1	849	36559	28	28	7	7	28.3	109151	1	1	1	485.971	1454.89	3	1454.89	-0.0022	0	41.72	20	24	0.0011	K	SAVTAAVTK	E			File837 Spectrum242788 scans: 6602	9681.03	34253.2	20071.8	22814.6	9778.25	10431.1	6502.82	8451.16	13.2409	15.0639	14.2929	14.4777	13.2554	13.3486	12.6669	13.0449	14.2689	-1.02792	0.795087	0.0240219
826	Pavir.Bb03603.1	Pavir.Bb03603.1	849	36559	28	28	7	7	28.3	351512	1	1	1	822.414	2464.22	3	2464.21	0.007	0	39.15		29	0.0055	K	GLLHSDQELFNGGSTDNTVR	N	Deamidated (NQ)	0.00000000001000000000.0	File838 Spectrum272853 scans: 14899	8275.18	10963.7	12816.5	8067.54	5521.06	7964.95	6273.9	7410.74	13.0146	13.4205	13.6457	12.9779	12.4307	12.9594	12.6151	12.8554	13.2647	-0.250087	0.155788	0.381049
826	Pavir.Bb03603.1	Pavir.Bb03603.1	849	36559	28	28	7	7	28.3	241308	1	1	1	627.354	1879.04	3	1879.05	-0.0096	0	39.05	20	29	0.0052	K	AAFSSAFAAAMVK	M			File834 Spectrum184707 scans: 20959	7376.53	12151.9	17190.8	24280	6171.06	6526.78	13841	13083.7	12.8487	13.5689	14.0693	14.5675	12.5913	12.6722	13.7567	13.6755	13.7636	-0.914886	-0.194716	0.305735
828	Pavir.Ia00532.1	Pavir.Ia00532.1	846	38122	36	36	6	6	25.9	138993	1	1	1	773.888	1545.76	2	1545.76	-0.0009	0	48.04		25	0.00026	R	FADLTDEEFR	A			File834 Spectrum183163 scans: 19312	102919	61112.4	103061	53112.2	6472.58	3320.67	12853.8	17288	16.6511	15.8992	16.6531	15.6968	12.6601	11.6973	13.6499	14.0775	16.2251	0.426088	-0.325877	0.428087
828	Pavir.Ia00532.1	Pavir.Ia00532.1	846	38122	36	36	6	6	25.9	138989	1	1	1	773.887	1545.76	2	1545.76	-0.0023	0	39.34	19	25	0.002	R	FADLTDEEFR	A			File834 Spectrum183076 scans: 19219	85794.6	60792.5	98634.8	47239.6	3714.73	1905.99	10782.2	14115.2	16.3886	15.8916	16.5898	15.5277	11.859	10.8963	13.3964	13.785	16.0994	0.289168	-0.207824	0.490378
828	Pavir.Ia00532.1	Pavir.Ia00532.1	846	38122	36	36	6	6	25.9	138990	1	1	1	773.887	1545.76	2	1545.76	-0.0019	0	45.44	19	25	0.00048	R	FADLTDEEFR	A			File834 Spectrum183050 scans: 19191	44400.4	29529.5	45903.8	22959.9	3562.26	2589.38	4795.36	7735.87	15.4383	14.8499	15.4863	14.4868	11.7986	11.3384	12.2274	12.9173	15.0653	0.372956	-0.215456	0.420998
828	Pavir.Ia00532.1	Pavir.Ia00532.1	846	38122	36	36	6	6	25.9	409903	1	0	1	994.185	2979.53	3	2979.54	-0.0032	0	79.93		31	7.5e-07	R	NDEAALAAAVAHQPVSVAINGADPAFR	F	Deamidated (NQ)	0.000000000000000000010000000.0	File837 Spectrum254964 scans: 19590	15959.2	12533.3	14502.9	8717.99	3101.3	1920.81	6247.77	6121.43	13.9621	13.6135	13.8241	13.0898	11.5987	10.9075	12.6091	12.5797	13.6224	0.339749	-0.00887726	0.2017
828	Pavir.Ia00532.1	Pavir.Ia00532.1	846	38122	36	36	6	6	25.9	409905	1	0	1	994.186	2979.54	3	2979.54	-0.0003	0	77.11	18	31	1.5e-06	R	NDEAALAAAVAHQPVSVAINGADPAFR	F	Deamidated (NQ)	0.000000000000000000010000000.0	File837 Spectrum255024 scans: 19654	6605.48	6695.57	7865.4	4818.5	1325.1	1113.8	3098.25	2524.81	12.6894	12.709	12.9413	12.2344	10.3719	10.1213	11.5972	11.302	12.6435	0.045919	0.0654638	0.297777
898	Pavir.Aa02737.1	Pavir.Aa02737.1	782	77149	21	21	6	6	16.4	349510	1	1	1	817.113	2448.32	3	2448.32	-0.0027	0	69.31		31	7.5e-06	K	GLVAGEEELVPVEGEEGK	A			File830 Spectrum86093 scans: 16525	6087.53	6135.15	3224.23	2386.31	22889.6	29778.5	16691.5	6143.85	12.5716	12.5829	11.6547	11.2206	14.4824	14.862	14.0268	12.5849	12.0075	0.564183	0.575425	-0.352717
898	Pavir.Aa02737.1	Pavir.Aa02737.1	782	77149	21	21	6	6	16.4	265723	1	1	1	659.354	1975.04	3	1975.05	-0.0081	0	65.51		30	1.6e-05	R	DATAGAAGTAAEYAK	Q			File831 Spectrum102427 scans: 8947	5837.29	17567.6	6221.05	3893.41	34270.3	43068.7	20697.8	9072.27	12.5111	14.1006	12.6029	11.9268	15.0647	15.3944	14.3372	13.1472	12.7854	-0.274286	1.31526	-0.182427
898	Pavir.Aa02737.1	Pavir.Aa02737.1	782	77149	21	21	6	6	16.4	265727	1	1	1	659.356	1975.05	3	1975.05	-0.0004	0	54.27	17	30	0.00022	R	DATAGAAGTAAEYAK	Q			File831 Spectrum102522 scans: 9049	5503.54	54139.4	8516.71	8763.49	61716.9	67648.5	27775.5	9557.73	12.4261	15.7244	13.0561	13.0973	15.9134	16.0458	14.7615	13.2225	13.576	-1.14983	2.14841	-0.519897
898	Pavir.Aa02737.1	Pavir.Aa02737.1	782	77149	21	21	6	6	16.4	305794	1	1	1	723.37	2167.09	3	2167.09	-0.0063	0	45.06	16	29	0.0014	R	DVTMGTGETAAEYAK	Q	Oxidation (M)	0.000300000000000.0	File829 Spectrum54554 scans: 8905	4030.2	16313.1	4824.46	3766.99	13531.1	15681	8755.45	4946.47	11.9766	13.9937	12.2362	11.8792	13.724	13.9367	13.096	12.2722	12.5214	-0.544796	1.47231	-0.285278
898	Pavir.Aa02737.1	Pavir.Aa02737.1	782	77149	21	21	6	6	16.4	349513	1	1	1	817.114	2448.32	3	2448.32	0.0004	0	59.31		30	7.3e-05	K	GLVAGEEELVPVEGEEGK	A			File830 Spectrum85992 scans: 16417	4020.11	5986.54	4862.89	5516.84	23295.7	27252.4	14306.6	6748.15	11.973	12.5475	12.2476	12.4296	14.5078	14.7341	13.8044	12.7203	12.2994	-0.326417	0.248069	-0.0518399
898	Pavir.Aa02737.1	Pavir.Aa02737.1	782	77149	21	21	6	6	16.4	302987	1	1	1	718.037	2151.09	3	2151.1	-0.008	0	54.62	18	29	0.00017	R	DVTMGTGETAAEYAK	Q			File832 Spectrum127978 scans: 11215	3214.94	6332.63	5022.97	2534.74	44435.1	53220.5	25811.8	8657.45	11.6506	12.6286	12.2943	11.3076	15.4394	15.6997	14.6557	13.0797	11.9703	-0.319702	0.658311	0.324047
898	Pavir.Aa02737.1	Pavir.Aa02737.1	782	77149	21	21	6	6	16.4	58422	1	1	1	640.858	1279.7	2	1279.7	-0.0032	0	35.15	20	27	0.0081	K	ATEVTAGTAR	R			File830 Spectrum74591 scans: 4256	3173.17	7406.62	3197.87	3217.49	18090.3	19390.3	11203.1	5655.03	11.6317	12.8546	11.6429	11.6517	14.1429	14.243	13.4516	12.4653	11.9452	-0.313523	0.909369	-0.302336
898	Pavir.Aa02737.1	Pavir.Aa02737.1	782	77149	21	21	6	6	16.4	302986	1	1	1	718.037	2151.09	3	2151.1	-0.0082	0	66.49	18	29	1.1e-05	R	DVTMGTGETAAEYAK	Q			File832 Spectrum128027 scans: 11267	3064.79	7685.93	3864.38	2655.44	15581.7	23680.4	11905	4651.61	11.5816	12.908	11.916	11.3747	13.9276	14.5314	13.5393	12.1835	11.9451	-0.36351	0.962922	-0.0290631
898	Pavir.Aa02737.1	Pavir.Aa02737.1	782	77149	21	21	6	6	16.4	360344	1	1	1	847.433	2539.28	3	2539.28	-0.0032	0	70.06		30	5.5e-06	K	GQEEGGGQGQAMNLEEIGK	Y			File831 Spectrum106288 scans: 13066	2965.07	5658.75	3816.12	3242.62	12978.6	17920.6	12710.3	4894.9	11.5339	12.4663	11.8979	11.6629	13.6638	14.1293	13.6337	12.2571	11.8902	-0.356388	0.576029	0.00765256
898	Pavir.Aa02737.1	Pavir.Aa02737.1	782	77149	21	21	6	6	16.4	360345	1	1	1	847.433	2539.28	3	2539.28	-0.0028	0	69.02		30	6.9e-06	K	GQEEGGGQGQAMNLEEIGK	Y			File831 Spectrum106265 scans: 13041	2941.03	3542.1	4504.2	3713.64	10857.4	17290.5	13009.6	6147.22	11.5221	11.7904	12.1371	11.8586	13.4064	14.0777	13.6673	12.5857	11.827	-0.304935	-0.0366535	0.310013
898	Pavir.Aa02737.1	Pavir.Aa02737.1	782	77149	21	21	6	6	16.4	302990	1	1	1	718.039	2151.1	3	2151.1	-0.0022	0	55.33	17	30	0.00015	R	DVTMGTGETAAEYAK	Q			File831 Spectrum104818 scans: 11498	2890.22	4122.91	4347.99	3741.06	12310.6	15430.6	10082.2	4845.57	11.497	12.0094	12.0861	11.8692	13.5876	13.9135	13.2995	12.2425	11.8654	-0.368479	0.144004	0.220689
898	Pavir.Aa02737.1	Pavir.Aa02737.1	782	77149	21	21	6	6	16.4	302988	1	1	1	718.038	2151.09	3	2151.1	-0.0055	0	49.89	17	30	0.00052	R	DVTMGTGETAAEYAK	Q			File831 Spectrum104787 scans: 11465	2750.08	4443.3	2805.97	4388.24	13592.7	16768.4	7286.16	5375.87	11.4253	12.1174	11.4543	12.0994	13.7305	14.0335	12.8309	12.3923	11.7741	-0.348837	0.343318	-0.319812
898	Pavir.Aa02737.1	Pavir.Aa02737.1	782	77149	21	21	6	6	16.4	302992	1	1	1	718.04	2151.1	3	2151.1	0.0013	0	58.34	17	30	7.6e-05	R	DVTMGTGETAAEYAK	Q			File831 Spectrum104839 scans: 11520	2680.39	1853.18	3611.12	3961.09	6677.76	7446.4	4313.38	2696.34	11.3882	10.8558	11.8182	11.9517	12.7051	12.8623	12.0746	11.3968	11.5035	-0.115257	-0.647692	0.31475
898	Pavir.Aa02737.1	Pavir.Aa02737.1	782	77149	21	21	6	6	16.4	302991	1	1	1	718.04	2151.1	3	2151.1	-0.0009	0	53.32	17	30	0.00024	R	DVTMGTGETAAEYAK	Q			File831 Spectrum104777 scans: 11454	2515.54	3991.64	4334.24	3206.93	11521.3	12850.6	6394.33	5559.74	11.2967	11.9628	12.0816	11.647	13.492	13.6496	12.6426	12.4408	11.747	-0.450338	0.215775	0.334574
898	Pavir.Aa02737.1	Pavir.Aa02737.1	782	77149	21	21	6	6	16.4	302985	1	1	1	718.037	2151.09	3	2151.1	-0.0102	0	47.8		29	0.00081	R	DVTMGTGETAAEYAK	Q			File832 Spectrum127927 scans: 11160	2464.61	5235.63	2844.24	3731.74	8676.22	10302.4	6249.14	3874.66	11.2671	12.3541	11.4738	11.8656	13.0829	13.3307	12.6094	11.9199	11.7402	-0.473044	0.613958	-0.26636
898	Pavir.Aa02737.1	Pavir.Aa02737.1	782	77149	21	21	6	6	16.4	305790	1	1	1	723.367	2167.08	3	2167.09	-0.0131	0	57.72		29	7.4e-05	R	DVTMGTGETAAEYAK	Q	Oxidation (M)	0.000300000000000.0	File832 Spectrum125667 scans: 8749	2007.52	4495.46	2282.55	1850.28	4392.92	4258.33	3171.84	2826.4	10.9712	12.1343	11.1564	10.8535	12.101	12.0561	11.6311	11.4647	11.2789	-0.307652	0.8554	-0.122423
898	Pavir.Aa02737.1	Pavir.Aa02737.1	782	77149	21	21	6	6	16.4	388717	1	1	1	700.582	2798.3	4	2798.3	-0.0041	0	72.63	18	27	1.5e-06	R	AADQAEEPGHVAAAGAEDSASQAADR	T			File844 Spectrum403054 scans: 6896	1948.49	2328.72	2535.38	1904.44	5595.15	9042.95	3343.52	2974.39	10.9281	11.1853	11.308	10.8952	12.45	13.1426	11.7072	11.5384	11.0792	-0.151011	0.106171	0.228837
898	Pavir.Aa02737.1	Pavir.Aa02737.1	782	77149	21	21	6	6	16.4	305798	1	1	1	723.371	2167.09	3	2167.09	-0.0028	0	41.3	16	29	0.0035	R	DVTMGTGETAAEYAK	Q	Oxidation (M)	0.000300000000000.0	File830 Spectrum78803 scans: 8749	1309.69	16493.6	1915.22	1599.4	9003.22	9143.45	4871.8	3492.35	10.355	14.0096	10.9033	10.6433	13.1362	13.1585	12.2502	11.77	11.4778	-1.1228	2.53181	-0.574513
898	Pavir.Aa02737.1	Pavir.Aa02737.1	782	77149	21	21	6	6	16.4	362840	1	1	1	852.766	2555.28	3	2555.27	0.0022	0	60.28		30	5.1e-05	K	GQEEGGGQGQAMNLEEIGK	Y	Oxidation (M)	0.0000000000030000000.0	File828 Spectrum30837 scans: 9708	1158.76	1992.15	1551.12	1639.79	3585.17	4467.26	3341.14	1810.64	10.1784	10.9601	10.5991	10.6793	11.8078	12.1252	11.7061	10.8223	10.6042	-0.425852	0.355893	-0.00511942
903	Pavir.Bb03675.1	Pavir.Bb03675.1	777	48296	43	43	11	11	31.7	145889	1	1	1	783.445	1564.88	2	1564.88	-0.0006	0	46.69		28	0.00077	R	VEPVATDLYVR	Y			File838 Spectrum273065 scans: 15126	102720	171865	154877	147666	107222	136586	121668	82639.3	16.6484	17.3909	17.2408	17.172	16.7102	17.0594	16.8926	16.3345	17.113	-0.464646	0.277913	0.127759
903	Pavir.Bb03675.1	Pavir.Bb03675.1	777	48296	43	43	11	11	31.7	92021	1	1	1	699.886	1397.76	2	1397.76	0.0007	0	31.81	16	28	0.023	K	ASSAQAYAVAR	G			File835 Spectrum196576 scans: 6248	71362	68719.2	69277.9	74983.9	72045.5	70262.8	59044.3	69376.2	16.1229	16.0684	16.0801	16.1943	16.1366	16.1005	15.8495	16.0822	16.1164	0.00644457	-0.0479974	-0.0363162
903	Pavir.Bb03675.1	Pavir.Bb03675.1	777	48296	43	43	11	11	31.7	145930	1	1	1	783.448	1564.88	2	1564.88	0.0041	0	46.02	17	28	0.00087	R	VEPVATDLYVR	Y			File838 Spectrum272984 scans: 15039	32808.1	60311.2	50408.8	51533.2	35353	47956.4	39073.5	27647.3	15.0018	15.8801	15.6214	15.6532	15.1095	15.5494	15.2539	14.7549	15.5391	-0.537364	0.341012	0.0822626
903	Pavir.Bb03675.1	Pavir.Bb03675.1	777	48296	43	43	11	11	31.7	92007	1	1	1	699.882	1397.75	2	1397.76	-0.0067	0	29.21	14	28	0.039	K	ASSAQAYAVAR	G			File836 Spectrum220167 scans: 6031	29656.7	32838	32823.5	37183.6	30943.6	28469.1	22126	26313.2	14.8561	15.0031	15.0024	15.1824	14.9174	14.7971	14.4335	14.6835	15.011	-0.154923	-0.00791263	-0.00855162
903	Pavir.Bb03675.1	Pavir.Bb03675.1	777	48296	43	43	11	11	31.7	281781	1	1	1	684.045	2049.11	3	2049.12	-0.0065	0	36.21	19	30	0.013	K	EVVVEQQQEEPK	R			File827 Spectrum4473 scans: 7906	23810.1	41697.3	42223.6	44723.8	23998.2	34960.6	20309.1	27961.3	14.5393	15.3477	15.3658	15.4488	14.5506	15.0934	14.3098	14.7711	15.1754	-0.636082	0.1723	0.190394
903	Pavir.Bb03675.1	Pavir.Bb03675.1	777	48296	43	43	11	11	31.7	92014	1	1	1	699.885	1397.75	2	1397.76	-0.0025	0	33.48	17	28	0.017	K	ASSAQAYAVAR	G			File835 Spectrum196502 scans: 6169	18930.6	21172.6	20903	22195.6	19132.5	17113	13469.8	14047.9	14.2084	14.3699	14.3514	14.438	14.2237	14.0628	13.7174	13.7781	14.3419	-0.133506	0.027972	0.00948462
903	Pavir.Bb03675.1	Pavir.Bb03675.1	777	48296	43	43	11	11	31.7	281903	1	1	1	684.375	2050.1	3	2050.1	-0.0015	0	31.79	23	29	0.032	K	EVVVEQQQEEPK	R	Deamidated (NQ)	0.000000010000.0	File846 Spectrum452179 scans: 8370	9329.2	9319.14	4639.32	5395.39	1510.12	2829.46	8663.05	3310.73	13.1875	13.186	12.1797	12.3975	10.5605	11.4663	13.0807	11.6929	12.7377	0.449855	0.448299	-0.557984
903	Pavir.Bb03675.1	Pavir.Bb03675.1	777	48296	43	43	11	11	31.7	281900	1	1	1	684.374	2050.1	3	2050.1	-0.0043	0	38.83	24	29	0.0063	K	EVVVEQQQEEPK	R	Deamidated (NQ)	0.000000010000.0	File846 Spectrum452126 scans: 8313	8412.11	9839.15	3730.58	6767.51	1464.39	3058.14	6283.29	4952.08	13.0383	13.2643	11.8652	12.7244	10.5161	11.5784	12.6173	12.2738	12.723	0.315211	0.541277	-0.857857
903	Pavir.Bb03675.1	Pavir.Bb03675.1	777	48296	43	43	11	11	31.7	281899	1	1	1	684.374	2050.1	3	2050.1	-0.005	0	40.41	20	29	0.0044	K	EVVVEQQQEEPK	R	Deamidated (NQ)	0.000000010000.0	File846 Spectrum452193 scans: 8385	7955.95	11362.9	4870.28	7570.49	1495.02	3002.89	8953.03	4211.01	12.9578	13.472	12.2498	12.8862	10.5459	11.5521	13.1282	12.0399	12.8915	0.0663618	0.58059	-0.641667
903	Pavir.Bb03675.1	Pavir.Bb03675.1	777	48296	43	43	11	11	31.7	281901	1	1	1	684.374	2050.1	3	2050.1	-0.0039	0	31.9	23	29	0.031	K	EVVVEQQQEEPK	R	Deamidated (NQ)	0.000000010000.0	File846 Spectrum452136 scans: 8324	7680.64	11417.7	5201.64	7234.49	837.734	2957.1	8271.99	4328.72	12.907	13.479	12.3448	12.8207	9.71035	11.53	13.014	12.0797	12.8879	0.0191564	0.591128	-0.543105
903	Pavir.Bb03675.1	Pavir.Bb03675.1	777	48296	43	43	11	11	31.7	281902	1	1	1	684.374	2050.1	3	2050.1	-0.0036	0	33.39	22	29	0.022	K	EVVVEQQQEEPK	R	Deamidated (NQ)	0.000000010000.0	File846 Spectrum452149 scans: 8338	7487.8	9515.38	4695.22	7219.41	1063.31	2526.27	6965.42	2885.82	12.8703	13.216	12.197	12.8177	10.0544	11.3028	12.766	11.4948	12.7753	0.095072	0.440793	-0.578276
903	Pavir.Bb03675.1	Pavir.Bb03675.1	777	48296	43	43	11	11	31.7	281897	1	1	1	684.373	2050.1	3	2050.1	-0.007	0	38.03	19	29	0.0076	K	EVVVEQQQEEPK	R	Deamidated (NQ)	0.000000010000.0	File846 Spectrum452232 scans: 8426	6325.25	7556.6	3630.47	6321.67	776.517	2313.53	6121.96	3809.64	12.6269	12.8835	11.8259	12.6261	9.60087	11.1759	12.5798	11.8954	12.4906	0.136293	0.392907	-0.664675
903	Pavir.Bb03675.1	Pavir.Bb03675.1	777	48296	43	43	11	11	31.7	281904	1	1	1	684.375	2050.1	3	2050.1	-0.001	0	33.82	21	29	0.02	K	EVVVEQQQEEPK	R	Deamidated (NQ)	0.000000010000.0	File846 Spectrum452242 scans: 8437	5627.29	6144.85	3148.87	5582.36	589.518	2416.33	7228.87	2264.7	12.4582	12.5852	11.6206	12.4467	9.20339	11.2386	12.8196	11.1451	12.2777	0.180559	0.307496	-0.657049
903	Pavir.Bb03675.1	Pavir.Bb03675.1	777	48296	43	43	11	11	31.7	281898	1	1	1	684.373	2050.1	3	2050.1	-0.0065	0	39.84	19	29	0.005	K	EVVVEQQQEEPK	R	Deamidated (NQ)	0.000000010000.0	File846 Spectrum452260 scans: 8456	3460.91	4866.62	2651.12	3060.1	1020.9	1495.66	3097.19	2337.58	11.7569	12.2487	11.3724	11.5794	9.99563	10.5466	11.5967	11.1908	11.7393	0.0175889	0.509356	-0.36696
944	Pavir.J16347.1	Pavir.J16347.1	745	17831	34	34	5	5	48.3	307234	1	1	1	726.079	2175.22	3	2175.22	-0.0039	0	44.42	22	29	0.0016	K	IFFVSWSPATADVK	S			File834 Spectrum189696 scans: 26281	40302	26257.8	29776.2	26020.7	133307	185782	125500	127362	15.2986	14.6805	14.8619	14.6674	17.0244	17.5033	16.9373	16.9586	14.8771	0.421497	-0.196609	-0.0151939
944	Pavir.J16347.1	Pavir.J16347.1	745	17831	34	34	5	5	48.3	274404	1	1	1	1008.48	2014.94	2	2014.94	-0.0017	0	72.53	23	25	9.8e-07	R	DAGFGDLTASLPADGCR	Y	Methylthio (C)	0.00000000000000020.0	File841 Spectrum345907 scans: 20623	27340.2	27242.3	38961.5	23051.5	55337.3	144027	123946	88525.3	14.7387	14.7336	15.2498	14.4926	15.756	17.136	16.9194	16.4338	14.8037	-0.064922	-0.070096	0.446105
944	Pavir.J16347.1	Pavir.J16347.1	745	17831	34	34	5	5	48.3	307233	1	1	1	726.079	2175.21	3	2175.22	-0.0044	0	41.35	18	29	0.0033	K	IFFVSWSPATADVK	S			File834 Spectrum189802 scans: 26394	17338.2	5925.75	23434.5	23258.1	69776.6	91827.1	68104	70519.8	14.0817	12.5328	14.5163	14.5054	16.0905	16.4866	16.0555	16.1057	13.9091	0.172607	-1.37628	0.607285
944	Pavir.J16347.1	Pavir.J16347.1	745	17831	34	34	5	5	48.3	348958	1	1	1	815.725	2444.15	3	2444.16	-0.0022	0	58.16	16	27	4.5e-05	R	YAVYDHDFTVGDATAGEGPR	S			File836 Spectrum228577 scans: 15002	16234.5	10450.8	24295.3	15123.2	73820	93209.1	49975.5	56449.4	13.9868	13.3513	14.5684	13.8845	16.1717	16.5082	15.6089	15.7847	13.9477	0.0390334	-0.596417	0.620646
944	Pavir.J16347.1	Pavir.J16347.1	745	17831	34	34	5	5	48.3	307239	1	1	1	726.08	2175.22	3	2175.22	-0.0017	0	42.21	17	29	0.0026	K	IFFVSWSPATADVK	S			File835 Spectrum214906 scans: 25800	13457.4	8951.7	11970.6	14185.6	75752.2	115250	49889.2	70609.5	13.7161	13.1279	13.5472	13.7921	16.209	16.8144	15.6064	16.1076	13.5459	0.170264	-0.417906	0.00135604
944	Pavir.J16347.1	Pavir.J16347.1	745	17831	34	34	5	5	48.3	307237	1	1	1	726.08	2175.22	3	2175.22	-0.002	0	37.99	18	29	0.0068	K	IFFVSWSPATADVK	S			File835 Spectrum214844 scans: 25734	13004.5	4623.43	17201.5	15588.4	55505.5	85690.1	60711.4	55900.1	13.6667	12.1747	14.0702	13.9282	15.7603	16.3868	15.8897	15.7706	13.46	0.206745	-1.28523	0.610271
944	Pavir.J16347.1	Pavir.J16347.1	745	17831	34	34	5	5	48.3	307228	1	1	1	1088.61	2175.21	2	2175.22	-0.005	0	32.71	16	29	0.024	K	IFFVSWSPATADVK	S			File834 Spectrum189738 scans: 26325	12252.3	9866.47	13043.3	15954.6	64240.9	89040.2	59619.3	51673.4	13.5808	13.2683	13.671	13.9617	15.9712	16.4422	15.8635	15.6571	13.6204	-0.0396811	-0.352127	0.050574
944	Pavir.J16347.1	Pavir.J16347.1	745	17831	34	34	5	5	48.3	307235	1	1	1	1088.62	2175.22	2	2175.22	-0.0035	0	35.3	21	29	0.013	K	IFFVSWSPATADVK	S			File834 Spectrum189755 scans: 26343	11304.5	8303.19	11496.1	14521.4	55151.5	78166.5	46819.7	46987	13.4646	13.0194	13.4889	13.8259	15.7511	16.2543	15.5148	15.52	13.4497	0.0149037	-0.43025	0.0391531
944	Pavir.J16347.1	Pavir.J16347.1	745	17831	34	34	5	5	48.3	307238	1	1	1	726.08	2175.22	3	2175.22	-0.0018	0	34.4	21	29	0.015	K	IFFVSWSPATADVK	S			File835 Spectrum214815 scans: 25703	10844.4	7623.17	6632.42	8230.17	28625	41169.8	29911.5	29934.5	13.4047	12.8962	12.6953	13.0067	14.805	15.3293	14.8684	14.8695	13.0007	0.403944	-0.10454	-0.305395
944	Pavir.J16347.1	Pavir.J16347.1	745	17831	34	34	5	5	48.3	274395	1	1	1	1008.47	2014.93	2	2014.94	-0.0068	0	71.3	19	24	1.1e-06	R	DAGFGDLTASLPADGCR	Y	Methylthio (C)	0.00000000000000020.0	File841 Spectrum345805 scans: 20514	8117.45	9431.69	11849.9	9335.98	16943.7	42846.6	34166.5	27479.2	12.9868	13.2033	13.5326	13.1886	14.0485	15.3869	15.0603	14.7461	13.2278	-0.241011	-0.0245215	0.304769
944	Pavir.J16347.1	Pavir.J16347.1	745	17831	34	34	5	5	48.3	348959	1	1	1	815.725	2444.15	3	2444.16	-0.0017	0	53.52		27	0.00013	R	YAVYDHDFTVGDATAGEGPR	S			File836 Spectrum228544 scans: 14966	6954.16	10145.2	12214.8	10525.7	31469	38215.1	27088.7	27557.6	12.7637	13.3085	13.5763	13.3616	14.9416	15.2219	14.7254	14.7502	13.2525	-0.488876	0.0559764	0.323808
944	Pavir.J16347.1	Pavir.J16347.1	745	17831	34	34	5	5	48.3	274396	1	1	1	1008.47	2014.93	2	2014.94	-0.0055	0	53.14	18	25	7.8e-05	R	DAGFGDLTASLPADGCR	Y	Methylthio (C)	0.00000000000000020.0	File841 Spectrum345958 scans: 20677	6915.85	5649.75	8826.32	6015.77	13786.3	28852.8	27714.3	19541.5	12.7557	12.464	13.1076	12.5545	13.751	14.8164	14.7583	14.2543	12.7204	0.0352424	-0.256476	0.387148
944	Pavir.J16347.1	Pavir.J16347.1	745	17831	34	34	5	5	48.3	307240	1	1	1	1088.62	2175.22	2	2175.22	-0.0013	0	38.14	16	29	0.0065	K	IFFVSWSPATADVK	S			File834 Spectrum189779 scans: 26369	6328.89	8986.92	8609.77	9371.76	37686.1	52333.3	40663.8	38029.1	12.6277	13.1336	13.0718	13.1941	15.2017	15.6754	15.3115	15.2148	13.0068	-0.379066	0.126808	0.0649562
944	Pavir.J16347.1	Pavir.J16347.1	745	17831	34	34	5	5	48.3	274399	1	1	1	672.653	2014.94	3	2014.94	-0.0034	0	50.26	20	25	0.00016	R	DAGFGDLTASLPADGCR	Y	Methylthio (C)	0.00000000000000020.0	File842 Spectrum368604 scans: 20302	6275.35	7219.94	9046.69	6121.99	6546.38	10569.9	9252.94	7689.91	12.6155	12.8178	13.1432	12.5798	12.6765	13.3677	13.1757	12.9088	12.7891	-0.173573	0.028718	0.354123
944	Pavir.J16347.1	Pavir.J16347.1	745	17831	34	34	5	5	48.3	348962	1	1	1	815.726	2444.16	3	2444.16	0.0011	0	29.01		27	0.039	R	YAVYDHDFTVGDATAGEGPR	S			File836 Spectrum228650 scans: 15079	4670.84	8065.73	12037.7	7827.95	12036.6	15816.8	13665.4	12411	12.1895	12.9776	13.5553	12.9344	13.5551	13.9492	13.7382	13.5993	12.9142	-0.72472	0.063404	0.641084
944	Pavir.J16347.1	Pavir.J16347.1	745	17831	34	34	5	5	48.3	274394	1	1	1	1008.47	2014.93	2	2014.94	-0.0098	0	59.89	17	24	1.5e-05	R	DAGFGDLTASLPADGCR	Y	Methylthio (C)	0.00000000000000020.0	File841 Spectrum345977 scans: 20697	4361.56	3732.16	6674.63	4967.59	8482.72	17723.8	16931.4	14059.1	12.0906	11.8658	12.7045	12.2783	13.0503	14.1134	14.0474	13.7792	12.2348	-0.144177	-0.369011	0.469665
944	Pavir.J16347.1	Pavir.J16347.1	745	17831	34	34	5	5	48.3	348957	1	1	1	815.725	2444.15	3	2444.16	-0.0033	0	61.16	17	27	2.2e-05	R	YAVYDHDFTVGDATAGEGPR	S			File835 Spectrum204615 scans: 14823	4220.23	5471.24	8045.38	7081.42	20512.8	23353.5	15702.7	15830.5	12.0431	12.4177	12.9739	12.7898	14.3242	14.5113	13.9387	13.9504	12.5561	-0.513025	-0.138479	0.417812
944	Pavir.J16347.1	Pavir.J16347.1	745	17831	34	34	5	5	48.3	307231	1	1	1	726.079	2175.21	3	2175.22	-0.0046	0	33.19		29	0.022	K	IFFVSWSPATADVK	S			File834 Spectrum189645 scans: 26226	3966.33	3632.76	4070.49	4965	7415.84	7654.91	6322.17	5397.17	11.9536	11.8269	11.991	12.2776	12.8564	12.9022	12.6262	12.398	12.0123	-0.0586622	-0.1854	-0.0212652
944	Pavir.J16347.1	Pavir.J16347.1	745	17831	34	34	5	5	48.3	348956	1	1	1	815.724	2444.15	3	2444.16	-0.0055	0	55.43		27	8.2e-05	R	YAVYDHDFTVGDATAGEGPR	S			File835 Spectrum204710 scans: 14924	3430.44	3285.7	5359.23	3396.83	11593.5	12953.7	10608.9	10724.8	11.7442	11.682	12.3878	11.73	13.501	13.6611	13.373	13.3887	11.886	-0.141808	-0.204002	0.501822
944	Pavir.J16347.1	Pavir.J16347.1	745	17831	34	34	5	5	48.3	307242	1	1	1	726.08	2175.22	3	2175.22	-0.0006	0	34.03	20	29	0.017	K	IFFVSWSPATADVK	S			File835 Spectrum214786 scans: 25672	3296.78	3502.1	4098.83	3801.25	9999.68	14105.4	9861.18	11137.4	11.6868	11.774	12.001	11.8923	13.2877	13.784	13.2675	13.4431	11.8385	-0.151683	-0.0645197	0.162471
944	Pavir.J16347.1	Pavir.J16347.1	745	17831	34	34	5	5	48.3	307230	1	1	1	544.811	2175.21	4	2175.22	-0.0047	0	30.77		29	0.038	K	IFFVSWSPATADVK	S			File834 Spectrum189746 scans: 26334	3277.67	1707.57	3100.3	6342.55	15987.7	24140.9	15897	20629	11.6785	10.7377	11.5982	12.6308	13.9647	14.5592	13.9565	14.3324	11.6613	0.0171509	-0.92358	-0.0631127
944	Pavir.J16347.1	Pavir.J16347.1	745	17831	34	34	5	5	48.3	307241	1	1	1	726.08	2175.22	3	2175.22	-0.0006	0	48.2	20	29	0.00064	K	IFFVSWSPATADVK	S			File835 Spectrum214956 scans: 25853	2583.18	3168.66	2300.92	2905.9	9928.88	13852.5	9768.88	7649.54	11.3349	11.6297	11.168	11.5048	13.2774	13.7579	13.254	12.9012	11.4093	-0.0744058	0.220319	-0.241344
944	Pavir.J16347.1	Pavir.J16347.1	745	17831	34	34	5	5	48.3	307236	1	1	1	726.079	2175.22	3	2175.22	-0.0033	0	39.05	20	29	0.0054	K	IFFVSWSPATADVK	S			File836 Spectrum238565 scans: 25668	787.684	819.776	1012.06	871.742	1810.72	2390.6	1762.29	2160.44	9.62147	9.67909	9.98307	9.76776	10.8223	11.2232	10.7832	11.0771	9.76285	-0.141375	-0.0837612	0.220226
985	Pavir.J01120.1	Pavir.J01120.1	716	30965	23	23	3	3	17.7	330591	1	1	1	774.443	2320.31	3	2320.3	0.0045	0	34.19	18	29	0.018	R	SPPVAGATAAAAGGVGALMK	G	Oxidation (M)	0.00000000000000000030.0	File843 Spectrum384958 scans: 12584	29787.5	22005.3	22737.3	31302.6	48465.9	63057	33999.2	28129.4	14.8624	14.4256	14.4728	14.934	15.5647	15.9444	15.0532	14.7798	14.6737	0.188732	-0.248126	-0.200911
985	Pavir.J01120.1	Pavir.J01120.1	716	30965	23	23	3	3	17.7	219332	1	1	1	899.007	1796	2	1796	0.001	0	57.38		29	8.6e-05	K	TANEVTILIEAYR	T			File843 Spectrum395096 scans: 23398	29481.9	52144.3	48014.4	49604	191367	155475	95123.9	59947.4	14.8475	15.6702	15.5512	15.5982	17.546	17.2463	16.5375	15.8714	15.4168	-0.569234	0.253445	0.1344
985	Pavir.J01120.1	Pavir.J01120.1	716	30965	23	23	3	3	17.7	219328	1	1	1	899.006	1796	2	1796	-0.0006	0	62.07		29	3e-05	K	TANEVTILIEAYR	T			File843 Spectrum395201 scans: 23510	27151.2	25120	37327.3	41069.8	134043	108703	67460.7	54790.2	14.7287	14.6166	15.1879	15.3258	17.0323	16.73	16.0418	15.7416	14.9648	-0.236023	-0.348203	0.223189
985	Pavir.J01120.1	Pavir.J01120.1	716	30965	23	23	3	3	17.7	328198	1	1	1	769.109	2304.3	3	2304.31	-0.0046	0	78.94		29	6.2e-07	R	SPPVAGATAAAAGGVGALMK	G			File846 Spectrum460429 scans: 17170	26756.5	32288.1	43040.1	56454.4	102753	140044	110153	60519.2	14.7076	14.9787	15.3934	15.7848	16.6488	17.0955	16.7492	15.8851	15.2161	-0.508525	-0.237413	0.177267
985	Pavir.J01120.1	Pavir.J01120.1	716	30965	23	23	3	3	17.7	219320	1	1	1	899.005	1796	2	1796	-0.0021	0	52.48		29	0.00026	K	TANEVTILIEAYR	T			File843 Spectrum395233 scans: 23544	20311.6	18370.1	23612.7	23400.7	71569.8	54263.8	35606.9	26862.5	14.31	14.1651	14.5273	14.5143	16.1271	15.7277	15.1199	14.7133	14.3792	-0.06914	-0.214086	0.148119
985	Pavir.J01120.1	Pavir.J01120.1	716	30965	23	23	3	3	17.7	219334	1	1	1	899.008	1796	2	1796	0.0033	0	50.87		29	0.00037	K	TANEVTILIEAYR	T			File843 Spectrum395026 scans: 23323	12198.1	12615.9	16038	15126	50806.8	44872.5	23273.9	17904.6	13.5744	13.623	13.9692	13.8847	15.6327	15.4535	14.5064	14.128	13.7628	-0.188445	-0.139866	0.206387
985	Pavir.J01120.1	Pavir.J01120.1	716	30965	23	23	3	3	17.7	330563	1	1	1	774.442	2320.3	3	2320.3	0.0001	0	55.46	20	29	0.00013	R	SPPVAGATAAAAGGVGALMK	G	Oxidation (M)	0.00000000000000000030.0	File843 Spectrum384990 scans: 12618	11715	18405	10181.4	29496.9	33688.6	40863.2	27692.7	15393.3	13.5161	14.1678	13.3136	14.8483	15.04	15.3185	14.7572	13.91	13.9614	-0.445384	0.206361	-0.647805
985	Pavir.J01120.1	Pavir.J01120.1	716	30965	23	23	3	3	17.7	153213	1	1	1	528.974	1583.9	3	1583.9	-0.004	1	51.59		29	0.00035	R	DRGPVPASQVVR	D			File836 Spectrum219081 scans: 4873	8949.13	17146.5	12895.7	12513	42373.3	30469.2	17964.8	15494.2	13.1275	14.0656	13.6546	13.6111	15.3709	14.8951	14.1329	13.9194	13.6147	-0.487191	0.450904	0.0398736
985	Pavir.J01120.1	Pavir.J01120.1	716	30965	23	23	3	3	17.7	219327	1	1	1	899.006	1796	2	1796	-0.0006	0	66.52		29	1.1e-05	K	TANEVTILIEAYR	T			File843 Spectrum395269 scans: 23582	8248.1	8071.29	11266	9033.17	29173.8	21597.8	14816	11828	13.0098	12.9786	13.4597	13.141	14.8324	14.3986	13.8549	13.5299	13.1473	-0.137436	-0.168699	0.3124
985	Pavir.J01120.1	Pavir.J01120.1	716	30965	23	23	3	3	17.7	328199	1	1	1	769.109	2304.3	3	2304.31	-0.0037	0	50.21		29	0.00046	R	SPPVAGATAAAAGGVGALMK	G			File846 Spectrum460361 scans: 17097	5786.1	6484.83	9122.65	8854.72	15916.9	18056.5	12767.7	10998.4	12.4984	12.6629	13.1552	13.1122	13.9583	14.1402	13.6402	13.425	12.8572	-0.358799	-0.194321	0.298063
985	Pavir.J01120.1	Pavir.J01120.1	716	30965	23	23	3	3	17.7	153214	1	1	1	528.975	1583.9	3	1583.9	-0.0014	1	50.04		29	0.00047	R	DRGPVPASQVVR	D			File836 Spectrum219158 scans: 4955	4329.77	8296.25	7601.32	9570.07	13680.2	14436.2	7193.43	6266.06	12.0801	13.0182	12.892	13.2243	13.7398	13.8174	12.8125	12.6133	12.8037	-0.723593	0.214578	0.0883675
985	Pavir.J01120.1	Pavir.J01120.1	716	30965	23	23	3	3	17.7	219615	1	1	1	600.001	1796.98	3	1796.98	-0.0012	0	60.87	26	30	4.1e-05	K	TANEVTILIEAYR	T	Deamidated (NQ)	0.0010000000000.0	File837 Spectrum257034 scans: 21798	1348.97	1740.68	1481.22	2330.82	4635.25	5484.95	4319.08	2669.44	10.3976	10.7654	10.5326	11.1866	12.1784	12.4213	12.0765	11.3823	10.7206	-0.322928	0.0448681	-0.187996
985	Pavir.J01120.1	Pavir.J01120.1	716	30965	23	23	3	3	17.7	219611	1	1	1	600.001	1796.98	3	1796.98	-0.0025	0	48.99	22	29	0.00062	K	TANEVTILIEAYR	T	Deamidated (NQ)	0.0010000000000.0	File837 Spectrum257005 scans: 21767	1271	1199.76	1810.76	1059.23	2986.7	2232.66	2373.88	2134.65	10.3118	10.2285	10.8224	10.0488	11.5443	11.1246	11.213	11.0598	10.3529	-0.0411126	-0.124341	0.469516
985	Pavir.J01120.1	Pavir.J01120.1	716	30965	23	23	3	3	17.7	219617	1	1	1	600.001	1796.98	3	1796.98	-0.0006	0	70.55	26	30	4.5e-06	K	TANEVTILIEAYR	T	Deamidated (NQ)	0.0010000000000.0	File839 Spectrum302153 scans: 22773	1226.16	811.028	941.71	923.548	2618.69	2071.87	1248.42	1744.5	10.2599	9.66361	9.87914	9.85104	11.3546	11.0167	10.2859	10.7686	9.91343	0.346505	-0.249825	-0.0342919
985	Pavir.J01120.1	Pavir.J01120.1	716	30965	23	23	3	3	17.7	219612	1	1	1	600.001	1796.98	3	1796.98	-0.0021	0	69.46	29	29	5.6e-06	K	TANEVTILIEAYR	T	Deamidated (NQ)	0.0010000000000.0	File839 Spectrum302214 scans: 22838	1162.61	2228.27	1265.1	1522.63	1782.75	1452.17	1570.68	1970.97	10.1832	11.1217	10.305	10.5724	10.7999	10.504	10.6172	10.9447	10.5456	-0.362407	0.576142	-0.240524
985	Pavir.J01120.1	Pavir.J01120.1	716	30965	23	23	3	3	17.7	219607	1	1	1	600	1796.98	3	1796.98	-0.0054	0	61.18	21	29	3.5e-05	K	TANEVTILIEAYR	T	Deamidated (NQ)	0.0010000000000.0	File837 Spectrum257115 scans: 21884	913.687	1235.52	2619.38	822.933	1691.77	1478.82	1502.41	1217.56	9.83556	10.2709	11.355	9.68463	10.7243	10.5302	10.5531	10.2498	10.2865	-0.45097	-0.0156202	1.06848
985	Pavir.J01120.1	Pavir.J01120.1	716	30965	23	23	3	3	17.7	219608	1	1	1	600	1796.98	3	1796.98	-0.005	0	39.73		29	0.005	K	TANEVTILIEAYR	T	Deamidated (NQ)	0.0010000000000.0	File839 Spectrum302234 scans: 22859	480.496	562.419	664.981	673.116	1238.04	1016.81	526.077	819.554	8.90838	9.1355	9.37717	9.39471	10.2738	9.98983	9.03913	9.6787	9.20394	-0.29556	-0.0684387	0.173228
986	Pavir.Ba00161.1	Pavir.Ba00161.1	715	32767	40	40	10	10	43.1	87331	1	1	1	691.888	1381.76	2	1381.76	-0.0012	0	40.89		28	0.0027	K	AASAQAYAVAR	G			File838 Spectrum265430 scans: 6982	104091	104581	94881	104574	55450.1	73668.8	65550.6	99747.9	16.6675	16.6743	16.5338	16.6742	15.7589	16.1688	16.0003	16.606	16.6374	0.0300493	0.0368277	-0.103604
986	Pavir.Ba00161.1	Pavir.Ba00161.1	715	32767	40	40	10	10	43.1	281781	1	0	1	684.045	2049.11	3	2049.12	-0.0065	0	36.21	19	30	0.013	K	EVVVEQQQQEPK	R	Deamidated (NQ)	0.000000001000.0	File827 Spectrum4473 scans: 7906	23810.1	41697.3	42223.6	44723.8	23998.2	34960.6	20309.1	27961.3	14.5393	15.3477	15.3658	15.4488	14.5506	15.0934	14.3098	14.7711	15.1754	-0.636082	0.1723	0.190394
986	Pavir.Ba00161.1	Pavir.Ba00161.1	715	32767	40	40	10	10	43.1	281574	1	1	1	683.717	2048.13	3	2048.14	-0.0069	0	38.78	19	30	0.0067	K	EVVVEQQQQEPK	R			File829 Spectrum53559 scans: 7844	14683.1	19127.1	15646.5	9763.19	3953.09	9301.65	9827.87	13464.9	13.8419	14.2233	13.9336	13.2531	11.9488	13.1833	13.2627	13.7169	13.813	0.0288965	0.410357	0.120581
986	Pavir.Ba00161.1	Pavir.Ba00161.1	715	32767	40	40	10	10	43.1	281903	1	0	1	684.375	2050.1	3	2050.1	-0.0015	0	31.79	23	29	0.032	K	EVVVEQQQQEPK	R	2 Deamidated (NQ)	0.000000011000.0	File846 Spectrum452179 scans: 8370	9329.2	9319.14	4639.32	5395.39	1510.12	2829.46	8663.05	3310.73	13.1875	13.186	12.1797	12.3975	10.5605	11.4663	13.0807	11.6929	12.7377	0.449855	0.448299	-0.557984
986	Pavir.Ba00161.1	Pavir.Ba00161.1	715	32767	40	40	10	10	43.1	281900	1	0	1	684.374	2050.1	3	2050.1	-0.0043	0	38.83	24	29	0.0063	K	EVVVEQQQQEPK	R	2 Deamidated (NQ)	0.000000011000.0	File846 Spectrum452126 scans: 8313	8412.11	9839.15	3730.58	6767.51	1464.39	3058.14	6283.29	4952.08	13.0383	13.2643	11.8652	12.7244	10.5161	11.5784	12.6173	12.2738	12.723	0.315211	0.541277	-0.857857
986	Pavir.Ba00161.1	Pavir.Ba00161.1	715	32767	40	40	10	10	43.1	281899	1	0	1	684.374	2050.1	3	2050.1	-0.005	0	40.41	20	29	0.0044	K	EVVVEQQQQEPK	R	2 Deamidated (NQ)	0.000000011000.0	File846 Spectrum452193 scans: 8385	7955.95	11362.9	4870.28	7570.49	1495.02	3002.89	8953.03	4211.01	12.9578	13.472	12.2498	12.8862	10.5459	11.5521	13.1282	12.0399	12.8915	0.0663618	0.58059	-0.641667
986	Pavir.Ba00161.1	Pavir.Ba00161.1	715	32767	40	40	10	10	43.1	281901	1	0	1	684.374	2050.1	3	2050.1	-0.0039	0	31.9	23	29	0.031	K	EVVVEQQQQEPK	R	2 Deamidated (NQ)	0.000000011000.0	File846 Spectrum452136 scans: 8324	7680.64	11417.7	5201.64	7234.49	837.734	2957.1	8271.99	4328.72	12.907	13.479	12.3448	12.8207	9.71035	11.53	13.014	12.0797	12.8879	0.0191564	0.591128	-0.543105
986	Pavir.Ba00161.1	Pavir.Ba00161.1	715	32767	40	40	10	10	43.1	281902	1	0	1	684.374	2050.1	3	2050.1	-0.0036	0	33.39	22	29	0.022	K	EVVVEQQQQEPK	R	2 Deamidated (NQ)	0.000000011000.0	File846 Spectrum452149 scans: 8338	7487.8	9515.38	4695.22	7219.41	1063.31	2526.27	6965.42	2885.82	12.8703	13.216	12.197	12.8177	10.0544	11.3028	12.766	11.4948	12.7753	0.095072	0.440793	-0.578276
986	Pavir.Ba00161.1	Pavir.Ba00161.1	715	32767	40	40	10	10	43.1	281897	1	0	1	684.373	2050.1	3	2050.1	-0.007	0	38.03	19	29	0.0076	K	EVVVEQQQQEPK	R	2 Deamidated (NQ)	0.000000011000.0	File846 Spectrum452232 scans: 8426	6325.25	7556.6	3630.47	6321.67	776.517	2313.53	6121.96	3809.64	12.6269	12.8835	11.8259	12.6261	9.60087	11.1759	12.5798	11.8954	12.4906	0.136293	0.392907	-0.664675
986	Pavir.Ba00161.1	Pavir.Ba00161.1	715	32767	40	40	10	10	43.1	281904	1	0	1	684.375	2050.1	3	2050.1	-0.001	0	33.82	21	29	0.02	K	EVVVEQQQQEPK	R	2 Deamidated (NQ)	0.000000011000.0	File846 Spectrum452242 scans: 8437	5627.29	6144.85	3148.87	5582.36	589.518	2416.33	7228.87	2264.7	12.4582	12.5852	11.6206	12.4467	9.20339	11.2386	12.8196	11.1451	12.2777	0.180559	0.307496	-0.657049
986	Pavir.Ba00161.1	Pavir.Ba00161.1	715	32767	40	40	10	10	43.1	281898	1	0	1	684.373	2050.1	3	2050.1	-0.0065	0	39.84	19	29	0.005	K	EVVVEQQQQEPK	R	2 Deamidated (NQ)	0.000000011000.0	File846 Spectrum452260 scans: 8456	3460.91	4866.62	2651.12	3060.1	1020.9	1495.66	3097.19	2337.58	11.7569	12.2487	11.3724	11.5794	9.99563	10.5466	11.5967	11.1908	11.7393	0.0175889	0.509356	-0.36696
998	Pavir.J00406.1	Pavir.J00406.1	703	9706	28	28	2	2	37.8	169184	1	1	1	815.466	1628.92	2	1628.92	-0.0026	0	68.03		30	8.2e-06	R	IFVGTVAQTPHVG	-			File831 Spectrum110603 scans: 17669	54555.7	79543.6	101220	51121.6	110556	145967	158312	295421	15.7354	16.2795	16.6271	15.6416	16.7544	17.1553	17.2724	18.1724	16.0709	-0.335478	0.208537	0.556217
998	Pavir.J00406.1	Pavir.J00406.1	703	9706	28	28	2	2	37.8	169172	1	1	1	815.465	1628.91	2	1628.92	-0.0044	0	59.98		30	5e-05	R	IFVGTVAQTPHVG	-			File831 Spectrum110693 scans: 17765	36269.6	73609.4	60290.7	28696.2	82815.2	88684.4	114974	180952	15.1465	16.1676	15.8796	14.8086	16.3376	16.4364	16.811	17.4652	15.5006	-0.3541	0.667028	0.379073
998	Pavir.J00406.1	Pavir.J00406.1	703	9706	28	28	2	2	37.8	169174	1	1	1	815.465	1628.92	2	1628.92	-0.0042	0	59.46		30	5.7e-05	R	IFVGTVAQTPHVG	-			File831 Spectrum110516 scans: 17576	15416.7	30366.2	24371.8	15676.1	35230.7	44160	45887.7	76047	13.9122	14.8902	14.5729	13.9363	15.1045	15.4305	15.4858	16.2146	14.3279	-0.415693	0.562282	0.245028
998	Pavir.J00406.1	Pavir.J00406.1	703	9706	28	28	2	2	37.8	169151	1	1	1	815.463	1628.91	2	1628.92	-0.0072	0	40.54		30	0.0045	R	IFVGTVAQTPHVG	-			File832 Spectrum133614 scans: 17226	9937.47	13670.2	11890.6	11325.7	18302.9	17927.1	16337.9	24732.4	13.2787	13.7387	13.5375	13.4673	14.1598	14.1299	13.9959	14.5941	13.5056	-0.226902	0.233183	0.0319712
998	Pavir.J00406.1	Pavir.J00406.1	703	9706	28	28	2	2	37.8	169146	1	1	1	815.463	1628.91	2	1628.92	-0.0076	0	60.14		29	4.7e-05	R	IFVGTVAQTPHVG	-			File832 Spectrum133659 scans: 17274	4769.15	8152.38	6386.32	4406.82	9373.23	9716.41	9826.75	18084	12.2195	12.993	12.6408	12.1055	13.1943	13.2462	13.2625	14.1424	12.4897	-0.270188	0.503302	0.151066
1043	Pavir.J08461.1	Pavir.J08461.1	670	27294	26	26	5	5	31.8	276084	1	1	1	675.042	2022.1	3	2022.11	-0.0058	0	47.6	19	29	0.00086	K	EVEAVAAPAEAETK	E			File828 Spectrum31906 scans: 10849	60643.2	47982	37630.5	11662	2349.98	5994.13	15843.8	3095.47	15.8881	15.5502	15.1996	13.5095	11.1984	12.5493	13.9516	11.5959	15.0369	0.851207	0.513355	0.162763
1043	Pavir.J08461.1	Pavir.J08461.1	670	27294	26	26	5	5	31.8	291867	1	1	1	699.71	2096.11	3	2096.11	-0.003	0	38.22		30	0.0077	K	EAEPEAALAETETK	E			File846 Spectrum455178 scans: 11569	51036	28952	32660.1	11633.3	3967.22	6301.78	15491.2	6281.75	15.6392	14.8214	14.9952	13.506	11.9539	12.6215	13.9192	12.617	14.7405	0.898773	0.080921	0.254788
1043	Pavir.J08461.1	Pavir.J08461.1	670	27294	26	26	5	5	31.8	276092	1	1	1	675.043	2022.11	3	2022.11	-0.0029	0	57.72	20	29	8.3e-05	K	EVEAVAAPAEAETK	E			File828 Spectrum31965 scans: 10912	50245.2	31921.6	37864.6	16752.9	2669.87	5024.39	13462.4	4298.45	15.6167	14.9622	15.2086	14.0321	11.3826	12.2947	13.7166	12.0696	14.9549	0.661792	0.00734022	0.253656
1043	Pavir.J08461.1	Pavir.J08461.1	670	27294	26	26	5	5	31.8	291862	1	1	1	699.708	2096.1	3	2096.11	-0.0078	0	49.1	18	30	0.00066	K	EAEPEAALAETETK	E			File846 Spectrum455019 scans: 11399	26239	14873.8	17380.7	6776.82	2994.96	4823.8	7501.64	3389.21	14.6794	13.8605	14.0852	12.7264	11.5483	12.236	12.873	11.7267	13.8379	0.84155	0.0226075	0.247323
1043	Pavir.J08461.1	Pavir.J08461.1	670	27294	26	26	5	5	31.8	291864	1	1	1	699.709	2096.11	3	2096.11	-0.0047	0	52.71	19	30	0.00028	K	EAEPEAALAETETK	E			File846 Spectrum455226 scans: 11620	25939.6	18800.1	18307.8	7152.79	1927.37	3804.94	10399.4	2129.05	14.6629	14.1985	14.1602	12.8043	10.9124	11.8937	13.3442	11.056	13.9564	0.706423	0.242009	0.203722
1043	Pavir.J08461.1	Pavir.J08461.1	670	27294	26	26	5	5	31.8	304642	1	1	1	721.399	2161.17	3	2161.17	0.0013	0	50	18	30	0.00059	K	EAEPEAAPVAEAEIK	E			File827 Spectrum7509 scans: 11144	25170.5	15709.1	16372.8	6579.73	2385.42	2445.73	6682.22	3578.68	14.6194	13.9393	13.999	12.6838	11.22	11.2561	12.7061	11.8052	13.8104	0.809052	0.128918	0.188614
1043	Pavir.J08461.1	Pavir.J08461.1	670	27294	26	26	5	5	31.8	269106	1	1	1	664.379	1990.11	3	1990.12	-0.0051	0	50.28	19	29	0.0004	K	EAEPVAAPAVAETK	E			File830 Spectrum79399 scans: 9385	24859.5	16134.6	15671.5	6942.31	2523.14	2803.41	8680.82	4742.43	14.6015	13.9779	13.9359	12.7612	11.301	11.453	13.0836	12.2114	13.8191	0.782402	0.158759	0.116746
1043	Pavir.J08461.1	Pavir.J08461.1	670	27294	26	26	5	5	31.8	304635	1	1	1	721.396	2161.17	3	2161.17	-0.0051	0	50.5	17	30	0.00054	K	EAEPEAAPVAEAEIK	E			File846 Spectrum454441 scans: 10782	23722.8	17134.5	16904.9	6695.25	1968.88	3923.5	6526.29	2404.85	14.534	14.0646	14.0452	12.7089	10.9432	11.9379	12.672	11.2317	13.8382	0.695816	0.226444	0.206987
1043	Pavir.J08461.1	Pavir.J08461.1	670	27294	26	26	5	5	31.8	269110	1	1	1	664.38	1990.12	3	1990.12	-0.0016	0	43.63	17	29	0.0018	K	EAEPVAAPAVAETK	E			File830 Spectrum79254 scans: 9230	23218.5	17878.5	17751.7	12945.8	3069.68	2688.02	7846.78	6241.39	14.503	14.1259	14.1157	13.6602	11.5839	11.3923	12.9379	12.6077	14.1012	0.40179	0.0247418	0.0144738
1043	Pavir.J08461.1	Pavir.J08461.1	670	27294	26	26	5	5	31.8	269115	1	1	1	664.383	1990.13	3	1990.12	0.0066	0	44.49		29	0.0014	K	EAEPVAAPAVAETK	E			File829 Spectrum55144 scans: 9534	21247.8	17747.2	15468.6	5766.03	2678.81	5630.95	6871.17	4301.82	14.375	14.1153	13.9171	12.4934	11.3874	12.4592	12.7463	12.0707	13.7252	0.649841	0.390119	0.191864
1043	Pavir.J08461.1	Pavir.J08461.1	670	27294	26	26	5	5	31.8	276081	1	1	1	675.041	2022.1	3	2022.11	-0.0069	0	56.76	19	29	0.00011	K	EVEAVAAPAEAETK	E			File829 Spectrum56608 scans: 11096	20741.5	18196.7	13078.2	6989.15	2997.45	3302.62	8900.52	3926.24	14.3402	14.1514	13.6749	12.7709	11.5495	11.6894	13.1197	11.9389	13.7344	0.60588	0.417043	-0.0594742
1043	Pavir.J08461.1	Pavir.J08461.1	670	27294	26	26	5	5	31.8	276085	1	1	1	675.042	2022.1	3	2022.11	-0.0058	0	54.63	19	29	0.00017	K	EVEAVAAPAEAETK	E			File828 Spectrum31833 scans: 10771	19482.7	18101.2	13430.4	6664.41	3056.25	1479.47	5592.04	4428.51	14.2499	14.1438	13.7132	12.7023	11.5775	10.5309	12.4492	12.1126	13.7023	0.54761	0.441504	0.0109185
1043	Pavir.J08461.1	Pavir.J08461.1	670	27294	26	26	5	5	31.8	276090	1	1	1	675.042	2022.11	3	2022.11	-0.004	0	43.06	18	29	0.0024	K	EVEAVAAPAEAETK	E			File829 Spectrum56537 scans: 11020	15910.2	13392.3	10162.8	6168.81	3164.94	3211.42	11447.7	5489.11	13.9577	13.7091	13.311	12.5908	11.628	11.649	13.4828	12.4224	13.3921	0.565523	0.31698	-0.0811372
1043	Pavir.J08461.1	Pavir.J08461.1	670	27294	26	26	5	5	31.8	291869	1	1	1	699.71	2096.11	3	2096.11	-0.0012	0	38.32		30	0.0075	K	EAEPEAALAETETK	E			File845 Spectrum430956 scans: 11372	14778	13689.8	10255.2	8043.74	2142.68	3136.48	6011.59	4480.08	13.8512	13.7408	13.3241	12.9737	11.0652	11.6149	12.5535	12.1293	13.4724	0.378739	0.268392	-0.148358
1043	Pavir.J08461.1	Pavir.J08461.1	670	27294	26	26	5	5	31.8	291866	1	1	1	699.709	2096.11	3	2096.11	-0.0043	0	40.67	18	30	0.0045	K	EAEPEAALAETETK	E			File846 Spectrum455003 scans: 11382	13818.3	11341	10505.3	4572.24	2303.46	3136.97	5120.48	2518.08	13.7543	13.4693	13.3588	12.1587	11.1696	11.6152	12.3221	11.2981	13.1853	0.569023	0.283991	0.173566
1043	Pavir.J08461.1	Pavir.J08461.1	670	27294	26	26	5	5	31.8	269108	1	1	1	664.38	1990.12	3	1990.12	-0.0027	0	36.14		29	0.01	K	EAEPVAAPAVAETK	E			File829 Spectrum55219 scans: 9614	11915.6	13457.8	10065.2	6017.64	3891.46	3298.56	6006.79	3253.55	13.5406	13.7162	13.2971	12.555	11.9261	11.6876	12.5524	11.6678	13.2772	0.263364	0.438962	0.0198911
1043	Pavir.J08461.1	Pavir.J08461.1	670	27294	26	26	5	5	31.8	276096	1	1	1	675.045	2022.11	3	2022.11	0.003	0	44.39	18	29	0.0018	K	EVEAVAAPAEAETK	E			File829 Spectrum56676 scans: 11168	10939.2	10895.3	7683.17	5543.39	1769.48	1480.34	12323.8	4169.52	13.4172	13.4114	12.9075	12.4366	10.7891	10.5317	13.5892	12.0257	13.0432	0.374047	0.368249	-0.135681
1043	Pavir.J08461.1	Pavir.J08461.1	670	27294	26	26	5	5	31.8	291865	1	1	1	699.709	2096.11	3	2096.11	-0.0047	0	31.47	15	30	0.037	K	EAEPEAALAETETK	E			File845 Spectrum430767 scans: 11170	8696.04	9574.7	7345.76	5543.44	2931.89	3390.32	4209.69	4243.52	13.0861	13.225	12.8427	12.4366	11.5176	11.7272	12.0395	12.051	12.8976	0.188539	0.327408	-0.0549084
1043	Pavir.J08461.1	Pavir.J08461.1	670	27294	26	26	5	5	31.8	291863	1	1	1	699.709	2096.1	3	2096.11	-0.0052	0	42.28	17	30	0.0031	K	EAEPEAALAETETK	E			File846 Spectrum455307 scans: 11706	7090.35	6634.14	5673.78	3619.79	2130.34	1521.58	3656.3	2361.12	12.7916	12.6957	12.4701	11.8217	11.0569	10.5714	11.8362	11.2053	12.4448	0.346861	0.250914	0.025314
1043	Pavir.J08461.1	Pavir.J08461.1	670	27294	26	26	5	5	31.8	276082	1	1	1	675.042	2022.1	3	2022.11	-0.0066	0	38.4		29	0.0072	K	EVEAVAAPAEAETK	E			File828 Spectrum32045 scans: 10997	7084.29	7569.78	6435.05	4950.39	6666.24	6925	5581.68	4567.53	12.7904	12.886	12.6517	12.2733	12.7027	12.7576	12.4465	12.1572	12.6504	0.140032	0.235659	0.00135909
1043	Pavir.J08461.1	Pavir.J08461.1	670	27294	26	26	5	5	31.8	269104	1	1	1	498.536	1990.11	4	1990.12	-0.006	0	31.34	16	29	0.033	K	EAEPVAAPAVAETK	E			File830 Spectrum79288 scans: 9266	6681.87	6758.92	5104.71	4143.19	2033.37	1154.14	2460.16	3847.76	12.706	12.7226	12.3176	12.0165	10.9897	10.1726	11.2645	11.9098	12.4407	0.265349	0.281888	-0.123075
1043	Pavir.J08461.1	Pavir.J08461.1	670	27294	26	26	5	5	31.8	359888	1	1	1	846.428	2536.26	3	2536.26	-0.0017	0	45.68	16	30	0.0014	K	EPEAEAAPAEPETETETK	E			File842 Spectrum355521 scans: 6346	2414.05	1841.41	1426.99	1009.71	180.699	398.003	668.43	358.092	11.2372	10.8466	10.4788	9.97972	7.49744	8.63664	9.38463	8.48419	10.6356	0.601661	0.211018	-0.156823
1046	Pavir.Aa00887.1	Pavir.Aa00887.1	668	44456	46	46	4	4	12.9	53177	1	1	1	631.392	1260.77	2	1260.77	-0.0018	0	38.13		25	0.0025	R	GLLDTLLGR	K			File834 Spectrum187836 scans: 24297	1.93731e+06	1.21091e+06	2.19497e+06	2.12849e+06	1.46715e+07	1.87404e+07	1.06255e+07	9.32453e+06	20.8856	20.2077	21.0658	21.0214	23.8065	24.1596	23.341	23.1526	20.7951	0.0905074	-0.587455	0.27066
1046	Pavir.Aa00887.1	Pavir.Aa00887.1	668	44456	46	46	4	4	12.9	53172	1	1	1	631.392	1260.77	2	1260.77	-0.0021	0	40.53		25	0.0014	R	GLLDTLLGR	K			File834 Spectrum187926 scans: 24393	1.92619e+06	2.0271e+06	2.1405e+06	1.31727e+06	1.10118e+07	1.55819e+07	9.47825e+06	7.93207e+06	20.8773	20.951	21.0295	20.3291	23.3925	23.8934	23.1762	22.9193	20.7967	0.0805807	0.15425	0.232784
1046	Pavir.Aa00887.1	Pavir.Aa00887.1	668	44456	46	46	4	4	12.9	53150	1	1	1	631.391	1260.77	2	1260.77	-0.003	0	32.04	22	25	0.01	R	GLLDTLLGR	K			File834 Spectrum188016 scans: 24489	979228	1.46671e+06	1.20219e+06	1.05717e+06	7.44333e+06	9.68074e+06	6.25984e+06	5.40838e+06	19.9013	20.4842	20.1972	20.0118	22.8275	23.2067	22.5777	22.3668	20.1486	-0.247327	0.335542	0.0486167
1046	Pavir.Aa00887.1	Pavir.Aa00887.1	668	44456	46	46	4	4	12.9	53169	1	1	1	631.392	1260.77	2	1260.77	-0.0022	0	31.45	22	25	0.012	R	GLLDTLLGR	K			File834 Spectrum188196 scans: 24681	745929	1.75319e+06	956147	937791	4.36072e+06	5.62276e+06	3.55916e+06	4.05068e+06	19.5087	20.7416	19.8669	19.8389	22.0561	22.4228	21.7631	21.9497	19.989	-0.480325	0.752552	-0.12213
1046	Pavir.Aa00887.1	Pavir.Aa00887.1	668	44456	46	46	4	4	12.9	53162	1	1	1	631.391	1260.77	2	1260.77	-0.0023	0	37.31		25	0.003	R	GLLDTLLGR	K			File834 Spectrum188106 scans: 24585	333030	551147	468368	347342	2.0561e+06	2.84471e+06	1.76726e+06	1.69517e+06	18.3453	19.0721	18.8373	18.406	20.9715	21.4399	20.7531	20.693	18.6652	-0.319871	0.406915	0.172121
1046	Pavir.Aa00887.1	Pavir.Aa00887.1	668	44456	46	46	4	4	12.9	53173	1	1	1	631.392	1260.77	2	1260.77	-0.0021	0	31.13	20	25	0.013	R	GLLDTLLGR	K			File835 Spectrum213089 scans: 23862	287406	310152	587356	272696	2.29054e+06	2.92103e+06	1.53738e+06	1.34873e+06	18.1327	18.2426	19.1639	18.0569	21.1273	21.478	20.552	20.3632	18.399	-0.26631	-0.156422	0.764837
1046	Pavir.Aa00887.1	Pavir.Aa00887.1	668	44456	46	46	4	4	12.9	53143	1	1	1	631.391	1260.77	2	1260.77	-0.0035	0	30.45	22	25	0.015	R	GLLDTLLGR	K			File834 Spectrum188286 scans: 24777	232371	294221	251313	162386	1.13407e+06	1.59991e+06	1.01755e+06	1.06598e+06	17.8261	18.1665	17.9391	17.3091	20.1131	20.6096	19.9567	20.0237	17.8102	0.0158673	0.35634	0.128925
1046	Pavir.Aa00887.1	Pavir.Aa00887.1	668	44456	46	46	4	4	12.9	113214	1	1	1	489.957	1466.85	3	1466.86	-0.0056	0	38.28	16	28	0.0048	K	AADQVEVK	D			File829 Spectrum52150 scans: 6341	175667	106638	131614	109399	731761	780113	657554	723584	17.4225	16.7024	17.006	16.7392	19.481	19.5733	19.3267	19.4648	16.9675	0.454974	-0.265149	0.0384443
1046	Pavir.Aa00887.1	Pavir.Aa00887.1	668	44456	46	46	4	4	12.9	113217	1	1	1	489.957	1466.85	3	1466.86	-0.0051	0	39.84	19	28	0.0033	K	AADQVEVK	D			File829 Spectrum52119 scans: 6308	162532	156332	155765	137247	799031	781793	584959	649028	17.3104	17.2543	17.249	17.0664	19.6079	19.5764	19.158	19.3079	17.22	0.0903522	0.0342451	0.0290012
1046	Pavir.Aa00887.1	Pavir.Aa00887.1	668	44456	46	46	4	4	12.9	113218	1	1	1	489.957	1466.85	3	1466.86	-0.0049	0	37.83	15	28	0.0053	K	AADQVEVK	D			File829 Spectrum52062 scans: 6247	90700.2	85109.3	95162.1	78787.7	422831	383140	332551	403274	16.4688	16.377	16.5381	16.2657	18.6897	18.5475	18.3432	18.6214	16.4124	0.0564109	-0.0353788	0.125692
1046	Pavir.Aa00887.1	Pavir.Aa00887.1	668	44456	46	46	4	4	12.9	113231	1	1	1	734.433	1466.85	2	1466.86	-0.0041	0	38.4	21	28	0.0046	K	AADQVEVK	D			File829 Spectrum52134 scans: 6324	86775.7	95031.7	111239	98675.9	464408	550104	399613	435451	16.405	16.5361	16.7633	16.5904	18.825	19.0693	18.6082	18.7322	16.5737	-0.168705	-0.0375871	0.18959
1046	Pavir.Aa00887.1	Pavir.Aa00887.1	668	44456	46	46	4	4	12.9	113236	1	1	1	734.433	1466.85	2	1466.86	-0.0039	0	39.61	20	28	0.0035	K	AADQVEVK	D			File829 Spectrum52044 scans: 6228	48077.9	57573.5	60586.9	39078	208069	269233	207146	220977	15.5531	15.8131	15.8867	15.2541	17.6667	18.0385	17.6603	17.7535	15.6267	-0.0736609	0.18637	0.259971
1046	Pavir.Aa00887.1	Pavir.Aa00887.1	668	44456	46	46	4	4	12.9	53189	1	1	1	631.393	1260.77	2	1260.77	-0.0003	0	35.55	23	25	0.0048	R	GLLDTLLGR	K			File835 Spectrum213179 scans: 23958	44959.5	58487.1	39627.2	40378.3	224303	357486	195782	199563	15.4563	15.8358	15.2742	15.3013	17.7751	18.4475	17.5789	17.6065	15.4669	-0.0105789	0.368915	-0.192713
1046	Pavir.Aa00887.1	Pavir.Aa00887.1	668	44456	46	46	4	4	12.9	53183	1	1	1	631.392	1260.77	2	1260.77	-0.0013	0	32.38	22	25	0.011	R	GLLDTLLGR	K			File835 Spectrum213269 scans: 24054	39104.8	86296.6	51960	42982.2	216196	304353	190609	185885	15.2551	16.397	15.6651	15.3915	17.722	18.2154	17.5403	17.5041	15.6772	-0.422103	0.719857	-0.0120453
1046	Pavir.Aa00887.1	Pavir.Aa00887.1	668	44456	46	46	4	4	12.9	122066	1	1	1	748.446	1494.88	2	1494.89	-0.0093	0	29.99	16	28	0.039	K	VTVSEPQK	H			File833 Spectrum147654 scans: 6984	37538.6	40653.7	37267.8	41978.8	14540.5	217508	260858	413365	15.1961	15.3111	15.1856	15.3574	13.8278	17.7307	17.9929	18.6571	15.2626	-0.0664612	0.0485485	-0.0769094
1046	Pavir.Aa00887.1	Pavir.Aa00887.1	668	44456	46	46	4	4	12.9	53178	1	1	1	631.392	1260.77	2	1260.77	-0.0018	0	29.34	21	25	0.019	R	GLLDTLLGR	K			File835 Spectrum213362 scans: 24153	35520	62406.4	40347.5	33483.8	132375	183689	117291	127249	15.1163	15.9294	15.3002	15.0312	17.0143	17.4869	16.8397	16.9573	15.3443	-0.227934	0.585126	-0.0440879
1046	Pavir.Aa00887.1	Pavir.Aa00887.1	668	44456	46	46	4	4	12.9	113243	1	1	1	489.958	1466.85	3	1466.86	-0.0025	0	37.01	22	29	0.0093	K	AADQVEVK	D			File829 Spectrum52000 scans: 6181	27369.5	24182.7	25927.8	22304.4	68342.8	90179.2	63556.7	61158.2	14.7403	14.5617	14.6622	14.445	16.0605	16.4605	15.9558	15.9003	14.6023	0.137976	-0.040619	0.0599084
1046	Pavir.Aa00887.1	Pavir.Aa00887.1	668	44456	46	46	4	4	12.9	53182	1	1	1	631.392	1260.77	2	1260.77	-0.0016	0	29.27	23	25	0.019	R	GLLDTLLGR	K			File834 Spectrum187754 scans: 24209	24234.8	28959.8	28055.2	18895.7	130357	174447	92128.1	81462.1	14.5648	14.8218	14.776	14.2058	16.9921	17.4124	16.4914	16.3138	14.5921	-0.0272824	0.229686	0.183901
1046	Pavir.Aa00887.1	Pavir.Aa00887.1	668	44456	46	46	4	4	12.9	113232	1	1	1	734.433	1466.85	2	1466.86	-0.0041	0	34.96	19	28	0.01	K	AADQVEVK	D			File829 Spectrum52005 scans: 6186	15673.2	28114.7	19881.3	15877.5	73816.2	93589.9	66966.8	66595.8	13.936	14.779	14.2791	13.9547	16.1717	16.5141	16.0312	16.0231	14.2372	-0.301205	0.541821	0.0419054
1046	Pavir.Aa00887.1	Pavir.Aa00887.1	668	44456	46	46	4	4	12.9	113227	1	1	1	734.433	1466.85	2	1466.86	-0.0045	0	36.6	19	28	0.007	K	AADQVEVK	D			File829 Spectrum52270 scans: 6469	15051	20292.6	15880.5	15223.5	71095.7	78451.3	59176.1	72773.3	13.8776	14.3087	13.955	13.894	16.1175	16.2595	15.8527	16.1511	14.0088	-0.131234	0.299864	-0.0538396
1046	Pavir.Aa00887.1	Pavir.Aa00887.1	668	44456	46	46	4	4	12.9	113235	1	1	1	489.958	1466.85	3	1466.86	-0.004	0	30.39		28	0.029	K	AADQVEVK	D			File830 Spectrum76368 scans: 6152	14993	19772.9	20632.1	21119.4	30990.3	36584.9	29183.7	32109.5	13.872	14.2712	14.3326	14.3663	14.9195	15.159	14.8329	14.9707	14.2105	-0.338526	0.0607041	0.12207
1046	Pavir.Aa00887.1	Pavir.Aa00887.1	668	44456	46	46	4	4	12.9	113238	1	1	1	734.433	1466.85	2	1466.86	-0.0036	0	34.9	20	28	0.01	K	AADQVEVK	D			File829 Spectrum51995 scans: 6175	14064.3	24649.8	17423.2	16064.7	56005.6	71428.4	48419.2	48893	13.7798	14.5893	14.0887	13.9716	15.7733	16.1242	15.5633	15.5773	14.1073	-0.327593	0.481947	-0.0186212
1046	Pavir.Aa00887.1	Pavir.Aa00887.1	668	44456	46	46	4	4	12.9	53174	1	1	1	631.392	1260.77	2	1260.77	-0.0019	0	37.23		25	0.0031	R	GLLDTLLGR	K			File836 Spectrum237068 scans: 24064	13137.4	16839.5	13083.2	10766.6	93862.7	118430	65480.7	64151.7	13.6814	14.0396	13.6754	13.3943	16.5183	16.8537	15.9988	15.9692	13.6977	-0.0162731	0.341897	-0.0222334
1046	Pavir.Aa00887.1	Pavir.Aa00887.1	668	44456	46	46	4	4	12.9	53151	1	1	1	631.391	1260.77	2	1260.77	-0.003	0	27.94	19	25	0.026	R	GLLDTLLGR	K			File835 Spectrum213005 scans: 23772	11705.2	12306.8	15576.3	13818.4	75792.6	101407	53193.2	49307.8	13.5149	13.5872	13.9271	13.7543	16.2098	16.6298	15.699	15.5895	13.6958	-0.180986	-0.108682	0.231215
1046	Pavir.Aa00887.1	Pavir.Aa00887.1	668	44456	46	46	4	4	12.9	122054	1	1	1	748.445	1494.88	2	1494.89	-0.0115	0	30.13	21	29	0.043	K	VTVSEPQK	H			File833 Spectrum147702 scans: 7035	11358.6	18521.6	14042.2	14151.4	6440.9	54138.6	65921.8	109704	13.4715	14.1769	13.7775	13.7887	12.653	15.7244	16.0085	16.7433	13.8036	-0.332137	0.373285	-0.0261621
1046	Pavir.Aa00887.1	Pavir.Aa00887.1	668	44456	46	46	4	4	12.9	53149	1	1	1	631.391	1260.77	2	1260.77	-0.0032	0	32.32	22	25	0.0096	R	GLLDTLLGR	K			File827 Spectrum12713 scans: 16695	10831.5	18440.6	11969.7	9437.13	50006.7	61597.2	41688.9	32546.7	13.4029	14.1706	13.5471	13.2041	15.6098	15.9106	15.3474	14.9902	13.5812	-0.178249	0.589403	-0.034096
1046	Pavir.Aa00887.1	Pavir.Aa00887.1	668	44456	46	46	4	4	12.9	53171	1	1	1	631.392	1260.77	2	1260.77	-0.0021	0	38.19		25	0.0025	R	GLLDTLLGR	K			File834 Spectrum188381 scans: 24878	10566.5	20771.5	13709	10614.4	54395.9	67724.6	41754.6	43152.7	13.3672	14.3423	13.7428	13.3737	15.7312	16.0474	15.3496	15.3972	13.7065	-0.339316	0.635795	0.0363057
1046	Pavir.Aa00887.1	Pavir.Aa00887.1	668	44456	46	46	4	4	12.9	53144	1	1	1	631.391	1260.77	2	1260.77	-0.0035	0	35.39	22	25	0.0047	R	GLLDTLLGR	K			File835 Spectrum213425 scans: 24220	8911.86	11743	8052.67	8907.48	27390.3	35431.9	24193.8	27882.8	13.1215	13.5195	12.9753	13.1208	14.7414	15.1128	14.5624	14.7671	13.1843	-0.0627581	0.335241	-0.209016
1046	Pavir.Aa00887.1	Pavir.Aa00887.1	668	44456	46	46	4	4	12.9	53152	1	1	1	631.391	1260.77	2	1260.77	-0.0028	0	39.69	24	25	0.0018	R	GLLDTLLGR	K			File836 Spectrum237142 scans: 24143	8769.74	14116	11236	6473.09	54837.4	75199.9	45255.9	38757.8	13.0983	13.785	13.4558	12.6602	15.7429	16.1984	15.4658	15.2422	13.2499	-0.151544	0.535185	0.205981
1046	Pavir.Aa00887.1	Pavir.Aa00887.1	668	44456	46	46	4	4	12.9	113240	1	1	1	489.958	1466.85	3	1466.86	-0.0031	0	39.94	21	29	0.005	K	AADQVEVK	D			File829 Spectrum52333 scans: 6536	8563.62	17282.3	10357.2	13533.9	32381.5	35190.7	28722.2	37894.6	13.064	14.077	13.3383	13.7243	14.9829	15.1029	14.8099	15.2097	13.5509	-0.486908	0.526095	-0.212569
1046	Pavir.Aa00887.1	Pavir.Aa00887.1	668	44456	46	46	4	4	12.9	53184	1	1	1	631.392	1260.77	2	1260.77	-0.0011	0	25.49	17	25	0.049	R	GLLDTLLGR	K			File827 Spectrum12778 scans: 16764	6856.82	11166.6	7617.67	8145.68	19799	25741.9	14652.1	15000.9	12.7433	13.4469	12.8951	12.9918	14.2731	14.6518	13.8388	13.8728	13.0193	-0.275972	0.42761	-0.124162
1046	Pavir.Aa00887.1	Pavir.Aa00887.1	668	44456	46	46	4	4	12.9	53176	1	1	1	631.392	1260.77	2	1260.77	-0.0018	0	41.04		25	0.0013	R	GLLDTLLGR	K			File839 Spectrum303645 scans: 24365	4703.34	4396.1	5172.06	5409.66	36033.8	45588	22524.3	22209.8	12.1995	12.102	12.3365	12.4013	15.1371	15.4764	14.4592	14.4389	12.2598	-0.0603602	-0.157822	0.0766915
1046	Pavir.Aa00887.1	Pavir.Aa00887.1	668	44456	46	46	4	4	12.9	53181	1	1	1	631.392	1260.77	2	1260.77	-0.0016	0	35.73	24	25	0.0044	R	GLLDTLLGR	K			File836 Spectrum237002 scans: 23993	4113.62	2642.35	4550.07	3062	21530	28288.2	15958.1	13756.4	12.0062	11.3676	12.1517	11.5803	14.3941	14.7879	13.962	13.7478	11.7764	0.229762	-0.408828	0.375241
1046	Pavir.Aa00887.1	Pavir.Aa00887.1	668	44456	46	46	4	4	12.9	53170	1	1	1	631.392	1260.77	2	1260.77	-0.0022	0	29.37	22	25	0.019	R	GLLDTLLGR	K			File839 Spectrum303584 scans: 24299	2977.66	3873.54	3617.13	2662.73	15985.5	20712.5	11834.2	10652	11.54	11.9194	11.8206	11.3787	13.9645	14.3382	13.5307	13.3788	11.6647	-0.124719	0.254758	0.15595
1046	Pavir.Aa00887.1	Pavir.Aa00887.1	668	44456	46	46	4	4	12.9	53160	1	1	1	631.391	1260.77	2	1260.77	-0.0024	0	29.61	21	25	0.018	R	GLLDTLLGR	K			File836 Spectrum236991 scans: 23981	2422.83	3316.01	3909.02	1771.21	13403.7	17700.9	10635.4	9013.97	11.2425	11.6952	11.9326	10.7905	13.7103	14.1115	13.3766	13.1379	11.4152	-0.172725	0.280027	0.517386
1046	Pavir.Aa00887.1	Pavir.Aa00887.1	668	44456	46	46	4	4	12.9	281658	1	1	1	684.018	2049.03	3	2049.04	-0.0056	0	31.42		29	0.031	K	VEDDSPPAPEEEK	K			File842 Spectrum355177 scans: 5979	1916.46	3978.43	1406.84	1463.42	3399.45	2144.18	1397.08	4452.05	10.9042	11.958	10.4582	10.5151	11.7311	11.0662	10.4482	12.1203	10.9589	-0.0546696	0.999089	-0.500648
1046	Pavir.Aa00887.1	Pavir.Aa00887.1	668	44456	46	46	4	4	12.9	281672	1	1	1	684.019	2049.03	3	2049.04	-0.0014	0	53.27	22	29	0.00021	K	VEDDSPPAPEEEK	K			File843 Spectrum379248 scans: 6493	1841.89	3573.3	2307.57	2226.11	7412.61	8393.58	5337.4	5332.15	10.847	11.803	11.1722	11.1203	12.8558	13.0351	12.3819	12.3805	11.2356	-0.388647	0.56742	-0.0634633
1046	Pavir.Aa00887.1	Pavir.Aa00887.1	668	44456	46	46	4	4	12.9	281653	1	1	1	684.017	2049.03	3	2049.04	-0.0071	0	48.52	18	29	0.00058	K	VEDDSPPAPEEEK	K			File842 Spectrum355514 scans: 6339	1831.67	3291.33	2071.71	2332.89	7468.7	8474.47	4953.11	5112.4	10.8389	11.6845	11.0166	11.1879	12.8666	13.0489	12.2741	12.3198	11.182	-0.34303	0.502479	-0.165371
1046	Pavir.Aa00887.1	Pavir.Aa00887.1	668	44456	46	46	4	4	12.9	281650	1	1	1	684.017	2049.03	3	2049.04	-0.0078	0	37.52	16	29	0.0073	K	VEDDSPPAPEEEK	K			File844 Spectrum402928 scans: 6761	1562.31	2628.4	2006.69	1126.9	4292.05	5037.12	2426.5	3608.95	10.6095	11.36	10.9706	10.1381	12.0675	12.2984	11.2447	11.8174	10.7695	-0.160079	0.590423	0.201058
1046	Pavir.Aa00887.1	Pavir.Aa00887.1	668	44456	46	46	4	4	12.9	281665	1	1	1	684.018	2049.03	3	2049.04	-0.0036	0	38.7	17	29	0.0059	K	VEDDSPPAPEEEK	K			File843 Spectrum379130 scans: 6367	1517.45	3148.38	1528.03	1578.44	1921.41	3127.92	1290.83	2440.72	10.5674	11.6204	10.5775	10.6243	10.9079	11.611	10.3341	11.2531	10.8474	-0.279959	0.773	-0.269936
1046	Pavir.Aa00887.1	Pavir.Aa00887.1	668	44456	46	46	4	4	12.9	281652	1	1	1	684.017	2049.03	3	2049.04	-0.0071	0	41.12	25	29	0.0032	K	VEDDSPPAPEEEK	K			File843 Spectrum379008 scans: 6237	1372.89	2270.8	1686.65	1362.87	3460.63	2874.9	2342.91	3417.24	10.423	11.149	10.7199	10.4124	11.7568	11.4893	11.1941	11.7386	10.6761	-0.253088	0.472893	0.0438517
1046	Pavir.Aa00887.1	Pavir.Aa00887.1	668	44456	46	46	4	4	12.9	53185	1	1	1	631.392	1260.77	2	1260.77	-0.001	0	27.1	18	25	0.034	R	GLLDTLLGR	K			File838 Spectrum281829 scans: 24474	1315.83	1756.65	1740.94	1983.79	6764.04	8770.32	5505.57	4937.5	10.3618	10.7786	10.7657	10.954	12.7237	13.0984	12.4267	12.2696	10.715	-0.353259	0.0635924	0.0506369
1046	Pavir.Aa00887.1	Pavir.Aa00887.1	668	44456	46	46	4	4	12.9	53186	1	1	1	631.392	1260.77	2	1260.77	-0.0006	0	31.99	22	25	0.011	R	GLLDTLLGR	K			File838 Spectrum281796 scans: 24439	1137.66	1607.24	2042.19	2065.83	7775.19	10946.5	6015.68	5772.75	10.1519	10.6504	10.9959	11.0125	12.9247	13.4182	12.5545	12.495	10.7027	-0.550807	-0.0522879	0.293247
1046	Pavir.Aa00887.1	Pavir.Aa00887.1	668	44456	46	46	4	4	12.9	281668	1	1	1	684.019	2049.03	3	2049.04	-0.0027	0	38.08		29	0.0069	K	VEDDSPPAPEEEK	K			File843 Spectrum379117 scans: 6353	1071.41	3199.23	1102.79	1104.53	3309.71	4065.71	2137.63	2849.94	10.0653	11.6435	10.1069	10.1092	11.6925	11.9893	11.0618	11.4767	10.4812	-0.415948	1.16227	-0.374294
1046	Pavir.Aa00887.1	Pavir.Aa00887.1	668	44456	46	46	4	4	12.9	281674	1	1	1	684.02	2049.04	3	2049.04	0.001	0	51.03	21	29	0.00035	K	VEDDSPPAPEEEK	K			File844 Spectrum402881 scans: 6711	971.591	3112.17	2079.04	1142.4	4826.38	5243.38	3156.38	3617.92	9.92421	11.6037	11.0217	10.1579	12.2367	12.3563	11.6241	11.8209	10.6769	-0.752661	0.926841	0.344834
1046	Pavir.Aa00887.1	Pavir.Aa00887.1	668	44456	46	46	4	4	12.9	281667	1	1	1	684.019	2049.03	3	2049.04	-0.0027	0	38.95		29	0.0056	K	VEDDSPPAPEEEK	K			File844 Spectrum402939 scans: 6773	926.957	4433.48	1974.86	1475.05	3755.51	4625.78	2379.44	4191.95	9.85636	12.1142	10.9475	10.5266	11.8748	12.1755	11.2164	12.0334	10.8612	-1.00481	1.25306	0.086368
1052	Pavir.Ga00273.1	Pavir.Ga00273.1	665	31744	20	20	6	6	31.8	25193	1	1	1	567.326	1132.64	2	1132.64	-0.0018	0	27.49	21	25	0.033	R	SPDEILR	D			File834 Spectrum173693 scans: 9211	75287	123612	100755	122587	492487	414259	310356	155839	16.2001	16.9155	16.6205	16.9034	18.9097	18.6602	18.2436	17.2497	16.6599	-0.459762	0.255581	-0.0393859
1052	Pavir.Ga00273.1	Pavir.Ga00273.1	665	31744	20	20	6	6	31.8	407363	1	1	1	739.354	2953.39	4	2953.39	-0.0037	0	41.22		28	0.0025	R	DFHAAHPADAFSTSFGGGAALACVGAR	A	Methylthio (C)	0.000000000000000000000020000.0	File832 Spectrum136674 scans: 20491	1684.12	1626.85	1344.29	1595.87	1299.29	1636.18	1453.93	1302.77	10.7178	10.6679	10.3926	10.6401	10.3435	10.6761	10.5057	10.3474	10.6046	0.113181	0.0632659	-0.211974
1077	Pavir.J00540.1	Pavir.J00540.1	653	15234	24	24	2	2	30.4	285506	1	1	1	1035.01	2068	2	2068	-0.0031	0	69.64		27	3.2e-06	K	GWDEGVMTMQVGEVAR	I			File840 Spectrum320517 scans: 18464	35598.4	58788.7	104318	84980.6	250555	201314	182925	144403	15.1195	15.8433	16.6706	16.3748	17.9348	17.6191	17.4809	17.1397	16.0021	-0.882537	-0.158811	0.668562
1077	Pavir.J00540.1	Pavir.J00540.1	653	15234	24	24	2	2	30.4	292713	1	1	1	1051	2099.99	2	2099.99	-0.0027	0	59.19		26	2.7e-05	K	GWDEGVMTMQVGEVAR	I	2 Oxidation (M)	0.0000003030000000.0	File833 Spectrum152396 scans: 12042	27996	36913.1	33335.6	32113.1	71620.4	70907.1	48624.6	57043.6	14.7729	15.1718	15.0248	14.9709	16.1281	16.1136	15.5694	15.7998	14.9851	-0.212175	0.186738	0.0396683
1077	Pavir.J00540.1	Pavir.J00540.1	653	15234	24	24	2	2	30.4	292712	1	1	1	1051	2099.99	2	2099.99	-0.0034	0	50.22		26	0.00021	K	GWDEGVMTMQVGEVAR	I	2 Oxidation (M)	0.0000003030000000.0	File833 Spectrum152426 scans: 12074	22066	17967.1	21636.1	19380.9	54268.3	43537.5	32695.8	37995.5	14.4295	14.1331	14.4012	14.2423	15.7278	15.41	14.9968	15.2135	14.3015	0.128011	-0.168457	0.0996258
1077	Pavir.J00540.1	Pavir.J00540.1	653	15234	24	24	2	2	30.4	285500	1	1	1	1035	2067.99	2	2068	-0.0082	0	57.66		27	4.5e-05	K	GWDEGVMTMQVGEVAR	I			File840 Spectrum320479 scans: 18423	17585.7	23109.7	32141.5	25499.1	90253.3	76025.2	67300.2	54184.7	14.1021	14.4962	14.9721	14.6382	16.4617	16.2142	16.0383	15.7256	14.5522	-0.450043	-0.0559475	0.419989
1077	Pavir.J00540.1	Pavir.J00540.1	653	15234	24	24	2	2	30.4	285509	1	1	1	1035.01	2068	2	2068	-0.0016	0	73.49	21	27	1.3e-06	K	GWDEGVMTMQVGEVAR	I			File840 Spectrum320591 scans: 18543	13836.5	11896	25332.2	21721.2	72584.4	54888.1	54936.9	44285.1	13.7562	13.5382	14.6287	14.4068	16.1474	15.7442	15.7455	15.4345	14.0825	-0.326282	-0.544279	0.546214
1077	Pavir.J00540.1	Pavir.J00540.1	653	15234	24	24	2	2	30.4	292711	1	1	1	1051	2099.99	2	2099.99	-0.0034	0	51.64	19	26	0.00015	K	GWDEGVMTMQVGEVAR	I	2 Oxidation (M)	0.0000003030000000.0	File833 Spectrum152356 scans: 11999	11952.2	19433.7	17463.4	15600.8	30168.3	31297.6	21190	25281.7	13.545	14.2463	14.092	13.9293	14.8807	14.9338	14.3711	14.6258	13.9532	-0.408171	0.293115	0.138884
1077	Pavir.J00540.1	Pavir.J00540.1	653	15234	24	24	2	2	30.4	356866	1	1	1	838.135	2511.38	3	2511.39	-0.0126	0	30.73		30	0.052	K	DPGQQPFSFNIGLGSVIK	G			File832 Spectrum140291 scans: 24350	7926.56	7815.27	12263.8	10199.2	24684.6	23404.6	22395.7	15976.3	12.9525	12.9321	13.5821	13.3162	14.5913	14.5145	14.4509	13.9636	13.1957	-0.243232	-0.263631	0.386412
1077	Pavir.J00540.1	Pavir.J00540.1	653	15234	24	24	2	2	30.4	356868	1	1	1	838.136	2511.39	3	2511.39	-0.0086	0	41		30	0.0047	K	DPGQQPFSFNIGLGSVIK	G			File832 Spectrum140239 scans: 24294	7073.9	6232.19	7289.55	6950.18	14858.6	13069.7	11757.8	12242.9	12.7883	12.6055	12.8316	12.7628	13.859	13.6739	13.5213	13.5797	12.7471	0.041225	-0.141542	0.084549
1077	Pavir.J00540.1	Pavir.J00540.1	653	15234	24	24	2	2	30.4	356867	1	1	1	838.136	2511.39	3	2511.39	-0.0097	0	32.48		30	0.034	K	DPGQQPFSFNIGLGSVIK	G			File832 Spectrum140325 scans: 24386	6793.58	6270.49	7836.94	9743.54	26348	17419.6	16166.6	12332.5	12.73	12.6144	12.9361	13.2502	14.6854	14.0884	13.9807	13.5902	12.8827	-0.1527	-0.268294	0.0534187
1077	Pavir.J00540.1	Pavir.J00540.1	653	15234	24	24	2	2	30.4	292714	1	1	1	701.004	2099.99	3	2099.99	-0.0013	0	44.11		26	0.00089	K	GWDEGVMTMQVGEVAR	I	2 Oxidation (M)	0.0000003030000000.0	File838 Spectrum269969 scans: 11823	6438.63	11968.5	8977.88	4949.77	8880.95	7723.85	7685.84	6629.31	12.6525	13.547	13.1322	12.2731	13.1165	12.9151	12.908	12.6946	12.9012	-0.248662	0.645758	0.230958
1077	Pavir.J00540.1	Pavir.J00540.1	653	15234	24	24	2	2	30.4	289228	1	1	1	1043	2083.99	2	2084	-0.0039	0	61.5		26	1.7e-05	K	GWDEGVMTMQVGEVAR	I	Oxidation (M)	0.0000000030000000.0	File836 Spectrum229694 scans: 16193	6046.47	7150.05	12756.7	8530.38	30950.5	23548.4	23865.4	17243.1	12.5619	12.8037	13.639	13.0584	14.9177	14.5233	14.5426	14.0737	13.0157	-0.453866	-0.212006	0.62322
1077	Pavir.J00540.1	Pavir.J00540.1	653	15234	24	24	2	2	30.4	289223	1	1	1	1043	2083.99	2	2084	-0.0061	0	45.23		26	0.0007	K	GWDEGVMTMQVGEVAR	I	Oxidation (M)	0.0000000030000000.0	File836 Spectrum229711 scans: 16211	5897.33	5717.44	13821	10186	24745	19552.5	19183.1	15068.1	12.5258	12.4812	13.7546	13.3143	14.5948	14.2551	14.2275	13.8792	13.019	-0.493123	-0.537816	0.735605
1077	Pavir.J00540.1	Pavir.J00540.1	653	15234	24	24	2	2	30.4	356878	1	1	1	838.14	2511.4	3	2511.39	0.0033	0	38.89		30	0.0071	K	DPGQQPFSFNIGLGSVIK	G			File831 Spectrum116965 scans: 24455	5798.16	5764.36	8738.93	7072.85	17173.9	17506.6	14913.9	13386.4	12.5014	12.4929	13.0932	12.7881	14.0679	14.0956	13.8644	13.7085	12.7189	-0.217531	-0.225965	0.374331
1077	Pavir.J00540.1	Pavir.J00540.1	653	15234	24	24	2	2	30.4	285507	1	1	1	1035.01	2068	2	2068	-0.0026	0	71.16	19	27	2.3e-06	K	GWDEGVMTMQVGEVAR	I			File840 Spectrum320614 scans: 18567	5370.39	6971.2	10951.3	9804.81	32606.6	22021	27267	18779.1	12.3908	12.7672	13.4188	13.2593	14.9929	14.4266	14.7349	14.1968	12.959	-0.568213	-0.191832	0.459796
1077	Pavir.J00540.1	Pavir.J00540.1	653	15234	24	24	2	2	30.4	289233	1	1	1	1043.01	2084	2	2084	-0.0002	0	58.78		26	3.3e-05	K	GWDEGVMTMQVGEVAR	I	Oxidation (M)	0.0000000030000000.0	File836 Spectrum229664 scans: 16161	5366.68	6757.76	9391.33	8047.2	24070	22467.4	17397.4	14597.3	12.3898	12.7223	13.1971	12.9743	14.5549	14.4555	14.0866	13.8334	12.8209	-0.431068	-0.0985524	0.376232
1077	Pavir.J00540.1	Pavir.J00540.1	653	15234	24	24	2	2	30.4	289235	1	1	1	1043.01	2084	2	2084	0.0018	0	57.64		27	4.4e-05	K	GWDEGVMTMQVGEVAR	I	Oxidation (M)	0.0000000030000000.0	File836 Spectrum229729 scans: 16230	5180.4	5859.91	8557.02	7374.4	20107.7	14628.7	16356.3	10847	12.3388	12.5167	13.0629	12.8483	14.2955	13.8365	13.9976	13.405	12.6917	-0.352831	-0.175015	0.371214
1077	Pavir.J00540.1	Pavir.J00540.1	653	15234	24	24	2	2	30.4	356870	1	1	1	838.137	2511.39	3	2511.39	-0.0045	0	36.95		30	0.011	K	DPGQQPFSFNIGLGSVIK	G			File831 Spectrum117214 scans: 24720	4506.67	3580.83	5695.15	4952	7287.61	6784.33	7307.3	6231.3	12.1378	11.8061	12.4755	12.2738	12.8312	12.728	12.8351	12.6053	12.1733	-0.0354635	-0.36723	0.302208
1077	Pavir.J00540.1	Pavir.J00540.1	653	15234	24	24	2	2	30.4	356874	1	1	1	838.139	2511.39	3	2511.39	-0.0002	0	33.88	15	30	0.023	K	DPGQQPFSFNIGLGSVIK	G			File831 Spectrum117163 scans: 24666	4397.85	3130.32	6451.09	6897.65	15249.2	11758	11783.6	7261.63	12.1026	11.6121	12.6553	12.7519	13.8964	13.5214	13.5245	12.8261	12.2805	-0.17789	-0.66838	0.374854
1077	Pavir.J00540.1	Pavir.J00540.1	653	15234	24	24	2	2	30.4	292710	1	1	1	701.003	2099.99	3	2099.99	-0.004	0	32.21		26	0.013	K	GWDEGVMTMQVGEVAR	I	2 Oxidation (M)	0.0000003030000000.0	File833 Spectrum152321 scans: 11962	4113.26	6127.57	4956.57	5345.18	4928.94	6425.06	4514.87	5305.24	12.0061	12.5811	12.2751	12.384	12.2671	12.6495	12.1405	12.3732	12.3116	-0.305512	0.269521	-0.0364524
1098	Pavir.J27516.1	Pavir.J27516.1	642	28465	22	22	4	4	21.2	233652	1	1	1	926.959	1851.9	2	1851.91	-0.0009	0	66.11		26	6.1e-06	R	GGPAAAMQSAATTNER	M	Oxidation (M)	0.0000003000000000.0	File829 Spectrum49473 scans: 3476	295.289	625.607	340.762	312.692	2877.4	4279.78	1966.28	2672.8	8.20598	9.28911	8.41262	8.2886	11.4905	12.0633	10.9413	11.3841	8.54908	-0.343096	0.740034	-0.136457
1098	Pavir.J27516.1	Pavir.J27516.1	642	28465	22	22	4	4	21.2	233653	1	1	1	926.959	1851.9	2	1851.91	-0.0009	0	48.27		26	0.00037	R	GGPAAAMQSAATTNER	M	Oxidation (M)	0.0000003000000000.0	File829 Spectrum49432 scans: 3426	282.192	1189.01	94.7427	440.987	2439.6	4289.23	1543.03	2394.76	8.14053	10.2155	6.56594	8.78459	11.2524	12.0665	10.5915	11.2257	8.42665	-0.286121	1.78889	-1.86071
1098	Pavir.J27516.1	Pavir.J27516.1	642	28465	22	22	4	4	21.2	233953	1	1	1	618.636	1852.89	3	1852.89	-0.0014	0	36.85		26	0.0044	R	GGPAAAMQSAATTNER	M	Deamidated (NQ); Oxidation (M)	0.0000003000000100.0	File828 Spectrum25165 scans: 3643	206.885	473.444	271.593	347.995	205.107	297.041	175.587	376.815	7.69269	8.88705	8.0853	8.44292	7.68023	8.21452	7.45605	8.55771	8.27699	-0.584304	0.610061	-0.191688
1098	Pavir.J27516.1	Pavir.J27516.1	642	28465	22	22	4	4	21.2	233954	1	1	1	618.637	1852.89	3	1852.89	-0.0006	0	29.36	17	26	0.025	R	GGPAAAMQSAATTNER	M	Deamidated (NQ); Oxidation (M)	0.0000003000000100.0	File828 Spectrum25206 scans: 3691	204.177	656.638	197.07	471.761	345.252	248.626	231.067	220.528	7.67367	9.35896	7.62256	8.88191	8.43151	7.95783	7.85217	7.78482	8.38428	-0.710601	0.974679	-0.761714
1098	Pavir.J27516.1	Pavir.J27516.1	642	28465	22	22	4	4	21.2	233650	1	1	1	926.959	1851.9	2	1851.91	-0.0012	0	61.2		26	1.9e-05	R	GGPAAAMQSAATTNER	M	Oxidation (M)	0.0000003000000000.0	File829 Spectrum49417 scans: 3406	184.28	302.279	164.941	140.536	1994.75	3738.61	1070.66	1873.43	7.52576	8.23974	7.36581	7.13479	10.962	11.8683	10.0643	10.8715	7.56652	-0.0407652	0.673214	-0.200716
1099	Pavir.J00256.1	Pavir.J00256.1	642	43025	21	21	5	5	23.9	417260	1	1	1	1024.86	3071.56	3	3071.56	-0.0008	0	123.98		32	3.5e-11	R	SIWTAEETHAVAAANASAASAAAADLAAR	A			File845 Spectrum440857 scans: 21933	7656.98	546.407	12764.6	7905.44	27945.4	19907.5	12475.7	14294.5	12.9026	9.09383	13.6399	12.9486	14.7703	14.281	13.6068	13.8032	12.1462	0.756338	-3.05239	1.49364
1099	Pavir.J00256.1	Pavir.J00256.1	642	43025	21	21	5	5	23.9	288191	1	1	1	1040.59	2079.16	2	2079.15	0.0052	0	72.71		29	2.6e-06	R	QQTLGEITLEEFLVR	A			File846 Spectrum470876 scans: 28313	4169	4737.85	6784.34	6069.89	9881.23	8667.84	7978.26	7395.05	12.0255	12.21	12.728	12.5675	13.2705	13.0815	12.9619	12.8523	12.3827	-0.357251	-0.172721	0.345255
1099	Pavir.J00256.1	Pavir.J00256.1	642	43025	21	21	5	5	23.9	417259	1	1	1	1024.86	3071.56	3	3071.56	-0.0015	0	88.97		32	1.1e-07	R	SIWTAEETHAVAAANASAASAAAADLAAR	A			File845 Spectrum440908 scans: 21987	3408.62	1194.75	5228.23	4044.35	13351.9	9943.61	6884.78	7443.25	11.735	10.2225	12.3521	11.9817	13.7048	13.2796	12.7492	12.8617	11.5728	0.162157	-1.35032	0.77929
1099	Pavir.J00256.1	Pavir.J00256.1	642	43025	21	21	5	5	23.9	288188	1	1	1	1040.58	2079.15	2	2079.15	0.0001	0	65.4		29	1.4e-05	R	QQTLGEITLEEFLVR	A			File846 Spectrum470902 scans: 28341	3367.49	4726.77	6243.43	5491.77	8390.58	9507.07	7507.67	5850.11	11.7175	12.2066	12.6081	12.4231	13.0346	13.2148	12.8741	12.5142	12.2388	-0.521362	-0.0321789	0.369304
1099	Pavir.J00256.1	Pavir.J00256.1	642	43025	21	21	5	5	23.9	288190	1	1	1	1040.59	2079.16	2	2079.15	0.0038	0	48.72		30	0.00069	R	QQTLGEITLEEFLVR	A			File846 Spectrum470925 scans: 28365	2991.46	3300.3	4830.95	4124.4	7840.45	6394.78	5627.57	4237.91	11.5466	11.6884	12.2381	12.01	12.9367	12.6427	12.4583	12.0491	11.8708	-0.324135	-0.182387	0.367321
1099	Pavir.J00256.1	Pavir.J00256.1	642	43025	21	21	5	5	23.9	288187	1	1	1	694.058	2079.15	3	2079.15	-0.0001	0	36.71		29	0.01	R	QQTLGEITLEEFLVR	A			File846 Spectrum470825 scans: 28259	1270.46	1784.51	1596.63	929.622	1439.25	1718.34	1549.93	1178.32	10.3111	10.8013	10.6408	9.8605	10.4911	10.7468	10.598	10.2025	10.4034	-0.0923039	0.397868	0.237376
1101	Pavir.J19600.1	Pavir.J19600.1	641	23645	24	24	5	5	27.4	194828	1	1	1	571.339	1710.99	3	1711	-0.0031	0	34.38	24	30	0.019	K	IGDLLSDATAK	L			File842 Spectrum368035 scans: 19695	4105.07	4253.89	3863.99	2545.67	12092.6	27799.8	10719.2	14070.3	12.0032	12.0546	11.9159	11.3138	13.5618	14.7628	13.3879	13.7804	11.8219	0.181325	0.232701	0.0940118
1101	Pavir.J19600.1	Pavir.J19600.1	641	23645	24	24	5	5	27.4	194829	1	1	1	571.339	1711	3	1711	-0.002	0	40.68	19	30	0.0044	K	IGDLLSDATAK	L			File843 Spectrum391597 scans: 19665	1671.03	1599.82	1649.81	2905.3	7967.92	15315.6	6213.08	8982.58	10.7065	10.6437	10.6881	11.5045	12.96	13.9027	12.6011	13.1329	10.8857	-0.179173	-0.241996	-0.19761
1102	Pavir.Ia03517.1	Pavir.Ia03517.1	641	20516	28	28	7	7	60.2	206387	1	1	1	585.001	1751.98	3	1751.99	-0.0051	0	58.02	23	29	7.9e-05	K	VEPSADGGSVVK	V			File831 Spectrum101033 scans: 7461	53376.7	73202.3	39512.3	17019.1	113386	141296	107430	75721.9	15.7039	16.1596	15.27	14.0549	16.7909	17.1084	16.713	16.2084	15.2971	0.40682	0.862501	-0.0270849
1102	Pavir.Ia03517.1	Pavir.Ia03517.1	641	20516	28	28	7	7	60.2	206395	1	1	1	877	1751.99	2	1751.99	-0.002	0	44.29	16	29	0.0018	K	VEPSADGGSVVK	V			File831 Spectrum101066 scans: 7496	25630.9	54414.3	34120.1	15353.8	83004.8	106229	80324.9	42872.4	14.6456	15.7317	15.0583	13.9063	16.3409	16.6968	16.2936	15.3878	14.8355	-0.189888	0.896212	0.22285
1102	Pavir.Ia03517.1	Pavir.Ia03517.1	641	20516	28	28	7	7	60.2	206394	1	1	1	877	1751.99	2	1751.99	-0.0023	0	38.91	20	29	0.0061	K	VEPSADGGSVVK	V			File831 Spectrum101043 scans: 7471	22587.1	49469.1	28454.3	16967.4	73475.2	85002.5	66281.7	38892.4	14.4632	15.5942	14.7964	14.0505	16.165	16.3752	16.0163	15.2472	14.7261	-0.262862	0.86817	0.0702867
1102	Pavir.Ia03517.1	Pavir.Ia03517.1	641	20516	28	28	7	7	60.2	206393	1	1	1	877	1751.99	2	1751.99	-0.0028	0	50.02	25	29	0.00049	K	VEPSADGGSVVK	V			File831 Spectrum101089 scans: 7520	18744.7	33306.2	19378.3	8314.16	48408.1	60961.8	49267.8	29732.7	14.1942	15.0235	14.2422	13.0214	15.563	15.8956	15.5884	14.8598	14.1203	0.0738942	0.903202	0.121851
1102	Pavir.Ia03517.1	Pavir.Ia03517.1	641	20516	28	28	7	7	60.2	206390	1	1	1	876.999	1751.98	2	1751.99	-0.0039	0	58.99	24	30	6.4e-05	K	VEPSADGGSVVK	V			File831 Spectrum101103 scans: 7535	12276	18352.6	10779.8	6442.37	34719.8	40377.5	29663.4	19519.1	13.5836	14.1637	13.396	12.6534	15.0835	15.3013	14.8564	14.2526	13.4492	0.13439	0.714529	-0.0531274
1102	Pavir.Ia03517.1	Pavir.Ia03517.1	641	20516	28	28	7	7	60.2	343856	1	1	1	803.772	2408.3	3	2408.3	-0.0015	0	73.03		30	2.8e-06	K	LVADVVASAHPVEGEGGVGSVR	Q			File844 Spectrum414478 scans: 19081	11682.2	15151.8	10357.6	7988.59	16035.8	13750	14515.2	7399.53	13.512	13.8872	13.3384	12.9637	13.969	13.7471	13.8253	12.8532	13.4253	0.0866842	0.461864	-0.0869381
1102	Pavir.Ia03517.1	Pavir.Ia03517.1	641	20516	28	28	7	7	60.2	370577	1	1	1	874.163	2619.47	3	2619.47	-0.0033	0	81.52		29	3.4e-07	K	STLVEGGGIGAAIETATSHIK	V			File846 Spectrum465736 scans: 22830	11221	16315.4	9737.03	9369.98	23701.3	22438.6	22585	15550.2	13.4539	13.9939	13.2493	13.1938	14.5327	14.4537	14.4631	13.9246	13.4727	-0.0188254	0.521206	-0.223472
1102	Pavir.Ia03517.1	Pavir.Ia03517.1	641	20516	28	28	7	7	60.2	343857	1	1	1	803.774	2408.3	3	2408.3	0.0027	0	76.44		30	1.3e-06	K	LVADVVASAHPVEGEGGVGSVR	Q			File844 Spectrum414447 scans: 19048	10676.4	18464.7	10937.3	7526.11	15948	12187.1	16345.4	9875.01	13.3821	14.1725	13.417	12.8777	13.9611	13.5731	13.9966	13.2696	13.4623	-0.0801791	0.710163	-0.0453518
1102	Pavir.Ia03517.1	Pavir.Ia03517.1	641	20516	28	28	7	7	60.2	370576	1	1	1	874.162	2619.47	3	2619.47	-0.0039	0	87.38	18	29	8.5e-08	K	STLVEGGGIGAAIETATSHIK	V			File846 Spectrum465715 scans: 22808	9096.82	13004	11325.1	5916.9	21165.1	18234.7	18091.4	15707.2	13.1511	13.6667	13.4672	12.5306	14.3694	14.1544	14.143	13.9391	13.2039	-0.0527712	0.462747	0.263317
1102	Pavir.Ia03517.1	Pavir.Ia03517.1	641	20516	28	28	7	7	60.2	206389	1	1	1	876.999	1751.98	2	1751.99	-0.0047	0	49.1	29	29	0.00061	K	VEPSADGGSVVK	V			File831 Spectrum101122 scans: 7555	6986.32	10272.5	6838.69	3900.21	16511.1	19597.3	14015.4	10468.1	12.7703	13.3265	12.7395	11.9293	14.0111	14.2584	13.7747	13.3537	12.6914	0.078904	0.635085	0.0480907
1108	Pavir.Da01632.1	Pavir.Da01632.1	638	21515	24	24	5	5	30.8	190798	1	1	1	566.667	1696.98	3	1696.98	-0.0016	0	31.25	18	29	0.034	K	IGDVLSDATAK	L			File837 Spectrum251715 scans: 16124	3540.48	2825.58	4270.34	4751.59	9920.97	10512.4	7438.61	7950.01	11.7897	11.4643	12.0601	12.2142	13.2763	13.3598	12.8608	12.9567	11.8821	-0.0923701	-0.417765	0.178037
1108	Pavir.Da01632.1	Pavir.Da01632.1	638	21515	24	24	5	5	30.8	190781	1	1	1	566.666	1696.98	3	1696.98	-0.0049	0	43.22	24	29	0.002	K	IGDVLSDATAK	L			File837 Spectrum251628 scans: 16031	2894.18	3333.28	3176.24	3791.69	6387.6	8659.93	6018.65	5887.11	11.4989	11.7027	11.6331	11.8886	12.6411	13.0801	12.5552	12.5233	11.6808	-0.181908	0.0218758	-0.0477439
1108	Pavir.Da01632.1	Pavir.Da01632.1	638	21515	24	24	5	5	30.8	190776	1	1	1	566.666	1696.98	3	1696.98	-0.0062	0	35.11	17	28	0.012	K	IGDVLSDATAK	L			File837 Spectrum251756 scans: 16168	2784.04	4817.96	4130.08	3876.17	9876.02	12239.7	6985.63	8680.99	11.443	12.2342	12.012	11.9204	13.2697	13.5793	12.7702	13.0836	11.9024	-0.459422	0.331822	0.109568
1118	Pavir.Ia02639.1	Pavir.Ia02639.1	632	24424	22	22	4	4	32.8	169513	1	1	1	816.401	1630.79	2	1630.79	-0.002	0	43.26		25	0.0008	K	AYEPPSNSSGYR	T			File831 Spectrum99602 scans: 5934	11540	23406.1	11062.5	16111.6	25748.2	25786.6	26044.6	27837.9	13.4944	14.5146	13.4334	13.9758	14.6522	14.6543	14.6687	14.7648	13.8545	-0.360186	0.660059	-0.421143
1118	Pavir.Ia02639.1	Pavir.Ia02639.1	632	24424	22	22	4	4	32.8	169785	1	1	1	816.893	1631.77	2	1631.77	-0.0013	0	53.34		24	6.9e-05	K	AYEPPSNSSGYR	T	Deamidated (NQ)	0.000000100000.0	File829 Spectrum52522 scans: 6737	8599.41	19132.6	8771.39	12546.2	22460.5	20741.1	18470.4	22860.1	13.07	14.2237	13.0986	13.615	14.4551	14.3402	14.1729	14.4805	13.5018	-0.431808	0.721916	-0.403241
1118	Pavir.Ia02639.1	Pavir.Ia02639.1	632	24424	22	22	4	4	32.8	169511	1	1	1	816.399	1630.78	2	1630.79	-0.0052	0	30.14		25	0.017	K	AYEPPSNSSGYR	T			File831 Spectrum99663 scans: 5999	5866.87	12119.3	5924	7146.03	14268	13659.2	12271.3	15673.5	12.5184	13.565	12.5324	12.8029	13.8005	13.7376	13.583	13.936	12.8547	-0.336292	0.710346	-0.322312
1118	Pavir.Ia02639.1	Pavir.Ia02639.1	632	24424	22	22	4	4	32.8	169784	1	1	1	816.893	1631.77	2	1631.77	-0.0022	0	36.85		24	0.0029	K	AYEPPSNSSGYR	T	Deamidated (NQ)	0.000000100000.0	File829 Spectrum52641 scans: 6864	4445.82	6883.81	4597.43	6156.62	8477.03	8701.9	7835.12	12579.2	12.1182	12.749	12.1666	12.5879	13.0493	13.0871	12.9357	13.6188	12.4054	-0.287205	0.343551	-0.238828
1119	Pavir.J35929.1	Pavir.J35929.1	632	22035	27	27	4	4	30.1	185950	1	1	1	561.335	1680.98	3	1680.99	-0.0032	0	36.44	17	29	0.0097	K	DGVLTVNVEK	L			File838 Spectrum270830 scans: 12742	6867.04	1720.41	7328.16	10468	26559	42489.2	21949.7	27434.3	12.7455	10.7485	12.8392	13.3537	14.6969	15.3748	14.4219	14.7437	12.4217	0.323737	-1.6732	0.417501
1119	Pavir.J35929.1	Pavir.J35929.1	632	22035	27	27	4	4	30.1	185972	1	1	1	561.337	1680.99	3	1680.99	0.001	0	40.16	17	29	0.0042	K	DGVLTVNVEK	L			File838 Spectrum270788 scans: 12697	5464.35	3375.77	10207.1	10837.2	27988.1	37412.9	16386.3	18498.8	12.4158	11.721	13.3173	13.4037	14.7725	15.1912	14.0002	14.1751	12.7145	-0.298621	-0.993454	0.602824
1119	Pavir.J35929.1	Pavir.J35929.1	632	22035	27	27	4	4	30.1	185960	1	1	1	561.336	1680.99	3	1680.99	-0.0019	0	35.17	15	29	0.013	K	DGVLTVNVEK	L			File838 Spectrum270907 scans: 12824	5340.92	3854.99	6181.11	4384.78	13006.1	24467.5	15510.4	14754.2	12.3829	11.9125	12.5937	12.0983	13.6669	14.5786	13.9209	13.8488	12.2468	0.136042	-0.33432	0.34682
1119	Pavir.J35929.1	Pavir.J35929.1	632	22035	27	27	4	4	30.1	185949	1	1	1	561.335	1680.98	3	1680.99	-0.0034	0	33.83	22	29	0.018	K	DGVLTVNVEK	L			File836 Spectrum226467 scans: 12751	5039.92	6440.39	8502.09	9490.92	12804.6	15171.1	9772.76	12366.2	12.2992	12.6529	13.0536	13.2123	13.6444	13.889	13.2545	13.5941	12.8045	-0.505327	-0.15158	0.249088
1119	Pavir.J35929.1	Pavir.J35929.1	632	22035	27	27	4	4	30.1	185952	1	1	1	561.336	1680.98	3	1680.99	-0.0026	0	30.25		29	0.04	K	DGVLTVNVEK	L			File838 Spectrum270758 scans: 12665	4630.53	2203.55	5522.89	10768.6	15509.7	33952	13184.9	17803.7	12.177	11.1056	12.4312	13.3945	13.9209	15.0512	13.6866	14.1199	12.2771	-0.100121	-1.17147	0.154126
1119	Pavir.J35929.1	Pavir.J35929.1	632	22035	27	27	4	4	30.1	185961	1	1	1	561.336	1680.99	3	1680.99	-0.0017	0	35.29	18	29	0.013	K	DGVLTVNVEK	L			File838 Spectrum270946 scans: 12865	4220.24	3220.66	6174.57	6263.08	12293.1	20417.8	11703	13521	12.0431	11.6531	12.5921	12.6127	13.5856	14.3175	13.5146	13.7229	12.2253	-0.182148	-0.572117	0.366865
1119	Pavir.J35929.1	Pavir.J35929.1	632	22035	27	27	4	4	30.1	185951	1	1	1	561.335	1680.98	3	1680.99	-0.0028	0	37.46		29	0.0076	K	DGVLTVNVEK	L			File836 Spectrum226385 scans: 12663	3896.62	4089.56	5038.59	4223.03	8220.17	12269	6412.57	8168.63	11.928	11.9977	12.2988	12.0441	13.005	13.5827	12.6467	12.9959	12.0672	-0.139144	-0.0694224	0.231654
1119	Pavir.J35929.1	Pavir.J35929.1	632	22035	27	27	4	4	30.1	185957	1	1	1	561.336	1680.99	3	1680.99	-0.0021	0	38.51	19	29	0.006	K	DGVLTVNVEK	L			File838 Spectrum270715 scans: 12619	2915.18	3589.67	4477.61	2948.82	9926.57	13594.6	8368.03	7213.42	11.5094	11.8096	12.1285	11.5259	13.2771	13.7308	13.0307	12.8165	11.7434	-0.233991	0.0662776	0.385152
1119	Pavir.J35929.1	Pavir.J35929.1	632	22035	27	27	4	4	30.1	185944	1	1	1	561.335	1680.98	3	1680.99	-0.0039	0	38.3	16	29	0.0061	K	DGVLTVNVEK	L			File838 Spectrum270970 scans: 12891	2024.66	2593.63	3050.43	3511.74	5324.52	7326.03	4898.16	7011.62	10.9835	11.3408	11.5748	11.778	12.3784	12.8388	12.258	12.7755	11.4192	-0.435784	-0.0784897	0.155552
1158	Pavir.Aa01371.1	Pavir.Aa01371.1	617	40710	25	25	7	7	21.3	85688	1	1	1	459.947	1376.82	3	1376.82	-0.0047	0	34.31		26	0.008	K	VSAGPGPGK	S			File835 Spectrum194865 scans: 4423	61026.1	25084.3	38140.9	14792.4	11807.6	16110.5	20212.6	11267.5	15.8971	14.6145	15.2191	13.8526	13.5274	13.9757	14.303	13.4599	14.8958	1.00133	-0.281315	0.323238
1158	Pavir.Aa01371.1	Pavir.Aa01371.1	617	40710	25	25	7	7	21.3	85697	1	1	1	689.418	1376.82	2	1376.82	-0.002	0	38.79		26	0.003	K	VSAGPGPGK	S			File835 Spectrum194913 scans: 4474	14334.3	6426.57	10424.6	4613.85	2991.58	3786.86	6812.96	3453.11	13.8072	12.6498	13.3477	12.1718	11.5467	11.8868	12.7341	11.7537	12.9941	0.813063	-0.344283	0.353581
1158	Pavir.Aa01371.1	Pavir.Aa01371.1	617	40710	25	25	7	7	21.3	85692	1	1	1	459.948	1376.82	3	1376.82	-0.0025	0	32.38	25	26	0.013	K	VSAGPGPGK	S			File835 Spectrum194940 scans: 4503	12225.6	5678.38	9308.85	3857.98	3862.62	3867.47	5934.62	3954.26	13.5776	12.4713	13.1844	11.9136	11.9154	11.9172	12.5349	11.9492	12.7867	0.79089	-0.315461	0.397663
1158	Pavir.Aa01371.1	Pavir.Aa01371.1	617	40710	25	25	7	7	21.3	85693	1	1	1	689.418	1376.82	2	1376.82	-0.0025	0	33.81	24	26	0.0095	K	VSAGPGPGK	S			File835 Spectrum194855 scans: 4412	8880.42	4048.09	6106.85	2789.92	1778.56	2552.83	3662.05	1801.67	13.1164	11.983	12.5762	11.446	10.7965	11.3179	11.8384	10.8151	12.2804	0.835998	-0.29739	0.295799
1158	Pavir.Aa01371.1	Pavir.Aa01371.1	617	40710	25	25	7	7	21.3	85695	1	1	1	459.948	1376.82	3	1376.82	-0.0022	0	30.19	23	26	0.022	K	VSAGPGPGK	S			File835 Spectrum194836 scans: 4392	6303.08	4681.37	5196.98	3062.41	1870.02	2671.57	3482.49	2213.13	12.6218	12.1927	12.3435	11.5805	10.8688	11.3835	11.7659	11.1119	12.1846	0.437225	0.00809868	0.158841
1158	Pavir.Aa01371.1	Pavir.Aa01371.1	617	40710	25	25	7	7	21.3	330661	1	1	1	774.706	2321.1	3	2321.1	-0.0067	0	62.43	25	27	1.6e-05	R	EESMEYEEGIILQEFR	K	Oxidation (M)	0.0003000000000000.0	File831 Spectrum114577 scans: 21907	3361.31	5190.47	2966.39	2608.3	1913.82	1589.22	1294.98	1932.85	11.7148	12.3416	11.5345	11.3489	10.9022	10.6341	10.3387	10.9165	11.735	-0.0201532	0.606688	-0.200467
1158	Pavir.Aa01371.1	Pavir.Aa01371.1	617	40710	25	25	7	7	21.3	330662	1	1	1	774.709	2321.11	3	2321.1	0.0019	0	48.83	16	28	0.00041	R	EESMEYEEGIILQEFR	K	Oxidation (M)	0.0003000000000000.0	File831 Spectrum114605 scans: 21937	2494.14	4055.44	3126.88	1741.8	2210.55	1972.4	2568.96	1890.24	11.2843	11.9856	11.6105	10.7664	11.1102	10.9457	11.327	10.8844	11.4117	-0.127383	0.573933	0.1988
1158	Pavir.Aa01371.1	Pavir.Aa01371.1	617	40710	25	25	7	7	21.3	330663	1	1	1	774.709	2321.11	3	2321.1	0.0019	0	60.49	23	28	2.8e-05	R	EESMEYEEGIILQEFR	K	Oxidation (M)	0.0003000000000000.0	File831 Spectrum114561 scans: 21890	2324.42	3772.89	3602.33	2027.65	2345.9	2104.16	1304.26	2233.31	11.1827	11.8815	11.8147	10.9856	11.1959	11.039	10.349	11.125	11.4661	-0.283448	0.415349	0.348609
1158	Pavir.Aa01371.1	Pavir.Aa01371.1	617	40710	25	25	7	7	21.3	328232	1	1	1	769.373	2305.1	3	2305.11	-0.0106	0	73.31	20	27	1.4e-06	R	EESMEYEEGIILQEFR	K			File833 Spectrum166350 scans: 26926	2215.99	2573.59	2301.89	1956.95	945.58	1123.31	1280.01	1396.94	11.1137	11.3296	11.1686	10.9344	9.88506	10.1335	10.3219	10.4481	11.1366	-0.0228366	0.192992	0.032029
1158	Pavir.Aa01371.1	Pavir.Aa01371.1	617	40710	25	25	7	7	21.3	85699	1	1	1	459.949	1376.82	3	1376.82	-0.0002	0	26.47	18	26	0.05	K	VSAGPGPGK	S			File836 Spectrum218624 scans: 4384	1716.05	2857.21	1485.06	1619.9	499.331	1351.6	905.216	1496.72	10.7449	11.4804	10.5363	10.6617	8.96385	10.4004	9.82212	10.5476	10.8558	-0.110941	0.624578	-0.31951
1163	Pavir.Db00648.1	Pavir.Db00648.1	615	39412	29	29	7	7	20.8	162347	1	1	1	805.983	1609.95	2	1609.95	0.001	0	40.48	25	29	0.0042	K	LPGDTASTLK	A			File838 Spectrum268622 scans: 10386	45753.6	48294.9	38568.7	37414.6	23796.4	19727.6	25606.3	33780	15.4816	15.5596	15.2351	15.1913	14.5385	14.2679	14.6442	15.0439	15.3669	0.114688	0.192675	-0.131767
1163	Pavir.Db00648.1	Pavir.Db00648.1	615	39412	29	29	7	7	20.8	162342	1	1	1	805.981	1609.95	2	1609.95	-0.0017	0	47.88	23	29	0.00078	K	LPGDTASTLK	A			File838 Spectrum268590 scans: 10352	43735.5	52082.7	38567.8	47490.6	22300.3	21200.1	27117	35529	15.4165	15.6685	15.2351	15.5354	14.4448	14.3718	14.7269	15.1167	15.4639	-0.0473574	0.204643	-0.228766
1196	Pavir.J37543.1	Pavir.J37543.1	593	71283	24	24	10	10	25.1	131766	1	1	1	509.292	1524.85	3	1524.86	-0.0061	0	47.81		28	0.0006	K	AEAAAEEVK	A			File846 Spectrum451729 scans: 7890	16829.8	20899.2	21295.6	19364.7	8160.14	6668.16	13032	9418.7	14.0387	14.3512	14.3783	14.2411	12.9944	12.7031	13.6698	13.2013	14.2523	-0.213592	0.0988362	0.125942
1196	Pavir.J37543.1	Pavir.J37543.1	593	71283	24	24	10	10	25.1	131770	1	1	1	509.293	1524.86	3	1524.86	-0.0044	0	46.15		28	0.00085	K	AEAAAEEVK	A			File846 Spectrum451660 scans: 7816	11062.3	15860.5	11200.3	12518.2	4053.97	3960.1	7579.09	7231.36	13.4334	13.9531	13.4513	13.6117	11.9851	11.9513	12.8878	12.8201	13.6124	-0.179015	0.340773	-0.161124
1196	Pavir.J37543.1	Pavir.J37543.1	593	71283	24	24	10	10	25.1	165820	1	1	1	540.971	1619.89	3	1619.9	-0.0079	0	31.81	16	29	0.03	K	AEAAPAEEPK	A			File845 Spectrum424737 scans: 4738	5482.27	7920.9	4564.25	5630.9	2376.9	2331.74	3738.93	3550.65	12.4206	12.9514	12.1562	12.4592	11.2149	11.1872	11.8684	11.7939	12.4968	-0.0762713	0.454619	-0.340669
1229	Pavir.J13145.1	Pavir.J13145.1	580	82237	31	31	6	6	10	162073	1	1	1	805.499	1608.98	2	1608.99	-0.0043	0	27.89		26	0.038	R	VQLPGLPAELLR	K			File832 Spectrum139781 scans: 23806	5038.53	5764.2	1294.48	2656.67	112980	87100.7	30624.3	21178.4	12.2988	12.4929	10.3382	11.3754	16.7857	16.4104	14.9024	14.3703	11.6263	0.672473	0.86659	-1.28815
1229	Pavir.J13145.1	Pavir.J13145.1	580	82237	31	31	6	6	10	162075	1	1	1	805.499	1608.98	2	1608.99	-0.0035	0	31.14	15	26	0.017	R	VQLPGLPAELLR	K			File832 Spectrum139815 scans: 23842	4746.26	4740.72	3334.38	6064.54	73185.1	62134.8	20327.3	15012.1	12.2126	12.2109	11.7032	12.5662	16.1593	15.9231	14.3111	13.8738	12.1732	0.0393639	0.037677	-0.47001
1229	Pavir.J13145.1	Pavir.J13145.1	580	82237	31	31	6	6	10	162066	1	1	1	805.498	1608.98	2	1608.99	-0.0061	0	33.28	21	27	0.015	R	VQLPGLPAELLR	K			File832 Spectrum139708 scans: 23728	2663.37	4405.26	2904.32	3159.15	37306.5	32613.3	9252.37	7174.18	11.379	12.105	11.504	11.6253	15.1871	14.9932	13.1756	12.8086	11.6533	-0.2743	0.451672	-0.149354
1229	Pavir.J13145.1	Pavir.J13145.1	580	82237	31	31	6	6	10	162069	1	1	1	537.335	1608.98	3	1608.99	-0.0048	0	29.9	18	26	0.024	R	VQLPGLPAELLR	K			File832 Spectrum139695 scans: 23714	1856.2	2902.76	1657.71	940.285	4929.3	4185.57	1716.15	1273.62	10.8581	11.5032	10.695	9.87695	12.2672	12.0312	10.745	10.3147	10.7333	0.124814	0.76989	-0.0383394
1229	Pavir.J13145.1	Pavir.J13145.1	580	82237	31	31	6	6	10	162077	1	1	1	537.335	1608.98	3	1608.99	-0.0026	0	39.19	17	26	0.0027	R	VQLPGLPAELLR	K			File833 Spectrum163940 scans: 24355	623.674	1820.74	1658.33	1492.58	3239.51	3239.88	1331.66	1512.42	9.28465	10.8303	10.6955	10.5436	11.6616	11.6617	10.379	10.5626	10.3385	-1.05387	0.491791	0.356998
1237	Pavir.Ab02274.1	Pavir.Ab02274.1	574	26795	33	33	8	8	50.8	404353	1	1	1	976.195	2925.56	3	2925.57	-0.0071	0	72.2		31	4.3e-06	R	ATYALLEDGATVHVLNETWSK	G			File844 Spectrum417651 scans: 22466	41183.5	50373.5	34798.3	63035.5	84112.5	77641.2	79002.7	90520.9	15.3298	15.6204	15.0867	15.9439	16.36	16.2445	16.2696	16.466	15.4952	-0.165411	0.125186	-0.40846
1237	Pavir.Ab02274.1	Pavir.Ab02274.1	574	26795	33	33	8	8	50.8	267891	1	1	1	993.52	1985.03	2	1985.03	0.0005	0	57.45		30	9.1e-05	K	TSIDEEVYSQLLER	A			File838 Spectrum279531 scans: 22023	28340.9	64052.5	39251.7	65360	125105	93784.6	123910	79130.1	14.7906	15.967	15.2605	15.9961	16.9328	16.5171	16.9189	16.2719	15.5035	-0.71294	0.463429	-0.24307
1237	Pavir.Ab02274.1	Pavir.Ab02274.1	574	26795	33	33	8	8	50.8	267893	1	1	1	993.521	1985.03	2	1985.03	0.0009	0	54.85		30	0.00017	K	TSIDEEVYSQLLER	A			File838 Spectrum279561 scans: 22055	14561.1	28547.5	16578.2	28054.9	58678.8	44195.7	52579	36235.3	13.8298	14.8011	14.017	14.776	15.8406	15.4316	15.6822	15.1451	14.356	-0.526135	0.445108	-0.33897
1237	Pavir.Ab02274.1	Pavir.Ab02274.1	574	26795	33	33	8	8	50.8	404356	1	1	1	732.399	2925.57	4	2925.57	-0.0041	0	45.37	18	31	0.002	R	ATYALLEDGATVHVLNETWSK	G			File844 Spectrum417800 scans: 22625	14168.4	10666.4	9084.19	18796.8	32196.9	22871.5	21405.6	29956.9	13.7904	13.3808	13.1491	14.1982	14.9746	14.4813	14.3857	14.8706	13.6296	0.160758	-0.248843	-0.480487
1237	Pavir.Ab02274.1	Pavir.Ab02274.1	574	26795	33	33	8	8	50.8	267894	1	1	1	993.522	1985.03	2	1985.03	0.0035	0	44.34		30	0.002	K	TSIDEEVYSQLLER	A			File838 Spectrum279415 scans: 21899	9096.44	18940.1	10819.6	15951.3	30225.9	25695	29369	20774.7	13.1511	14.2092	13.4014	13.9614	14.8835	14.6492	14.842	14.3425	13.6807	-0.529662	0.52841	-0.27939
1237	Pavir.Ab02274.1	Pavir.Ab02274.1	574	26795	33	33	8	8	50.8	404354	1	1	1	732.399	2925.56	4	2925.57	-0.0048	0	33.12	16	31	0.034	R	ATYALLEDGATVHVLNETWSK	G			File844 Spectrum417590 scans: 22401	5131.94	4760.19	4650.55	6594.99	10191.1	9053.68	7006.99	7682.06	12.3253	12.2168	12.1832	12.6872	13.315	13.1443	12.7746	12.9073	12.3531	-0.0278183	-0.136305	-0.169923
1237	Pavir.Ab02274.1	Pavir.Ab02274.1	574	26795	33	33	8	8	50.8	404351	1	1	1	732.395	2925.55	4	2925.57	-0.017	0	31.33	20	31	0.052	R	ATYALLEDGATVHVLNETWSK	G			File841 Spectrum347186 scans: 21987	4838.74	4398.87	4822.36	6386.66	6576.69	7306.82	6345.42	8032.97	12.2404	12.1029	12.2355	12.6408	12.6831	12.835	12.6315	12.9717	12.3049	-0.0645107	-0.202007	-0.0694031
1237	Pavir.Ab02274.1	Pavir.Ab02274.1	574	26795	33	33	8	8	50.8	267892	1	1	1	662.683	1985.03	3	1985.03	0.0008	0	50.22	22	30	0.00048	K	TSIDEEVYSQLLER	A			File838 Spectrum279394 scans: 21877	2066.12	3838.77	1596.26	2957.72	3736.6	3762.52	3430.94	1762.43	11.0127	11.9064	10.6405	11.5303	11.8675	11.8775	11.7444	10.7834	11.2725	-0.259761	0.633954	-0.63199
1251	Pavir.Ba01215.1	Pavir.Ba01215.1	568	33157	20	20	6	6	22.4	253563	1	1	1	643.023	1926.05	3	1926.05	-0.0047	0	54.13	18	30	0.00023	K	AGIAAEPVVQCSK	G	Methylthio (C)	0.0000000000200.0	File841 Spectrum339277 scans: 13551	59469.8	42870.6	79295.3	23755.9	153935	241414	132873	198218	15.8599	15.3877	16.2749	14.536	17.232	17.8811	17.0197	17.5967	15.5146	0.34524	-0.126927	0.760318
1251	Pavir.Ba01215.1	Pavir.Ba01215.1	568	33157	20	20	6	6	22.4	138330	1	1	1	772.923	1543.83	2	1543.84	-0.0047	0	28.38		28	0.054	K	FIDCPAPK	Q	Methylthio (C)	0.00020000.0	File845 Spectrum435143 scans: 15838	45063.1	60246.4	31164.5	22390.8	86282.9	172937	89991.7	178598	15.4597	15.8786	14.9276	14.4506	16.3968	17.3999	16.4575	17.4464	15.1791	0.280537	0.699466	-0.251503
1251	Pavir.Ba01215.1	Pavir.Ba01215.1	568	33157	20	20	6	6	22.4	253560	1	1	1	643.023	1926.05	3	1926.05	-0.0056	0	52.51	17	30	0.00032	K	AGIAAEPVVQCSK	G	Methylthio (C)	0.0000000000200.0	File841 Spectrum339322 scans: 13599	36332.1	31813.6	41223.3	16589.5	100396	167698	92833.8	175234	15.149	14.9574	15.3312	14.018	16.6153	17.3555	16.5024	17.4189	14.8639	0.285091	0.0934879	0.467307
1251	Pavir.Ba01215.1	Pavir.Ba01215.1	568	33157	20	20	6	6	22.4	253561	1	1	1	643.023	1926.05	3	1926.05	-0.0056	0	52.77	20	30	0.0003	K	AGIAAEPVVQCSK	G	Methylthio (C)	0.0000000000200.0	File840 Spectrum316105 scans: 13758	24583.3	38600.2	29650.2	7538.9	52173.3	114444	62561.4	114805	14.5854	15.2363	14.8558	12.8801	15.671	16.8043	15.933	16.8088	14.3894	0.19599	0.84692	0.466352
1251	Pavir.Ba01215.1	Pavir.Ba01215.1	568	33157	20	20	6	6	22.4	253570	1	1	1	964.033	1926.05	2	1926.05	-0.0018	0	69.1	25	30	6.8e-06	K	AGIAAEPVVQCSK	G	Methylthio (C)	0.0000000000200.0	File841 Spectrum339283 scans: 13557	22869.4	34606.4	12354.7	15682.1	69290.8	117314	59938.7	112036	14.4811	15.0788	13.5928	13.9368	16.0804	16.84	15.8712	16.7736	14.2724	0.208759	0.806378	-0.679596
1251	Pavir.Ba01215.1	Pavir.Ba01215.1	568	33157	20	20	6	6	22.4	253564	1	1	1	964.032	1926.05	2	1926.05	-0.0042	0	61.37	24	30	4.3e-05	K	AGIAAEPVVQCSK	G	Methylthio (C)	0.0000000000200.0	File841 Spectrum339274 scans: 13547	21502.2	31744.4	15059.4	11357.4	75563.1	126157	62451.7	112338	14.3922	14.9542	13.8784	13.4713	16.2054	16.9449	15.9305	16.7775	14.174	0.218165	0.78018	-0.29566
1251	Pavir.Ba01215.1	Pavir.Ba01215.1	568	33157	20	20	6	6	22.4	253559	1	1	1	643.023	1926.05	3	1926.05	-0.0058	0	55.56	23	30	0.00016	K	AGIAAEPVVQCSK	G	Methylthio (C)	0.0000000000200.0	File840 Spectrum316136 scans: 13791	20015.4	35843.1	31885.9	12884.7	52127.6	117861	48743.6	93032.3	14.2888	15.1294	14.9606	13.6534	15.6698	16.8467	15.5729	16.5054	14.5081	-0.219235	0.621349	0.452574
1251	Pavir.Ba01215.1	Pavir.Ba01215.1	568	33157	20	20	6	6	22.4	253551	1	1	1	643.022	1926.04	3	1926.05	-0.0087	0	52.8	17	30	0.0003	K	AGIAAEPVVQCSK	G	Methylthio (C)	0.0000000000200.0	File841 Spectrum339369 scans: 13649	18639.5	17526	10785.5	12518	36255.3	52307.9	22952.7	50574.7	14.1861	14.0972	13.3968	13.6117	15.1459	15.6747	14.4864	15.6261	13.823	0.363121	0.274262	-0.42615
1251	Pavir.Ba01215.1	Pavir.Ba01215.1	568	33157	20	20	6	6	22.4	253556	1	1	1	643.023	1926.05	3	1926.05	-0.0067	0	58.45	23	30	8.3e-05	K	AGIAAEPVVQCSK	G	Methylthio (C)	0.0000000000200.0	File840 Spectrum316165 scans: 13822	17876	20125.6	16676	7650.64	35137.2	65145.9	33413.9	54263.2	14.1257	14.2967	14.0255	12.9014	15.1007	15.9914	15.0282	15.7277	13.8373	0.2884	0.459413	0.188155
1251	Pavir.Ba01215.1	Pavir.Ba01215.1	568	33157	20	20	6	6	22.4	253555	1	1	1	643.023	1926.05	3	1926.05	-0.0071	0	65.17	21	30	1.8e-05	K	AGIAAEPVVQCSK	G	Methylthio (C)	0.0000000000200.0	File840 Spectrum316034 scans: 13682	14952.2	18314.9	17651.8	11912.2	29204	58178.6	28726.1	51460.4	13.8681	14.1607	14.1075	13.5402	14.8339	15.8282	14.8101	15.6512	13.9191	-0.0510482	0.241607	0.188407
1251	Pavir.Ba01215.1	Pavir.Ba01215.1	568	33157	20	20	6	6	22.4	253553	1	1	1	964.03	1926.04	2	1926.05	-0.008	0	56.47	22	30	0.00013	K	AGIAAEPVVQCSK	G	Methylthio (C)	0.0000000000200.0	File841 Spectrum339332 scans: 13609	14530.4	20117.4	8970.98	6269.96	41820.1	63846.6	31040.8	62470	13.8268	14.2962	13.131	12.6142	15.3519	15.9623	14.9219	15.9309	13.4671	0.359725	0.8291	-0.336008
1251	Pavir.Ba01215.1	Pavir.Ba01215.1	568	33157	20	20	6	6	22.4	253554	1	1	1	643.023	1926.05	3	1926.05	-0.0071	0	53.19	21	30	0.00029	K	AGIAAEPVVQCSK	G	Methylthio (C)	0.0000000000200.0	File841 Spectrum339192 scans: 13460	12696.6	21299.2	14238.9	4208	22238.4	50869.2	25938.3	43993.6	13.6322	14.3785	13.7975	12.0389	14.4408	15.6345	14.6628	15.425	13.4618	0.170372	0.916727	0.335765
1251	Pavir.Ba01215.1	Pavir.Ba01215.1	568	33157	20	20	6	6	22.4	253547	1	1	1	643.021	1926.04	3	1926.05	-0.0118	0	49.57	19	30	0.00062	K	AGIAAEPVVQCSK	G	Methylthio (C)	0.0000000000200.0	File840 Spectrum316004 scans: 13650	8876.07	10345.3	7426.57	5547.66	11551	24507.7	15177.4	25763.8	13.1157	13.3367	12.8585	12.4377	13.4957	14.581	13.8896	14.6531	12.9371	0.178571	0.399554	-0.0786544
1251	Pavir.Ba01215.1	Pavir.Ba01215.1	568	33157	20	20	6	6	22.4	209167	1	1	1	588.298	1761.87	3	1761.89	-0.0126	0	27.79	22	27	0.046	K	QSGACSGLEEK	D	Methylthio (C)	0.00002000000.0	File833 Spectrum150961 scans: 10511	7981.48	14298.9	6038.94	7055.64	11980.9	10431.8	15005	27008.3	12.9624	13.8036	12.5601	12.7846	13.5485	13.3487	13.8732	14.7211	13.0277	-0.0652327	0.775939	-0.467593
1251	Pavir.Ba01215.1	Pavir.Ba01215.1	568	33157	20	20	6	6	22.4	414945	1	1	1	760.375	3037.47	4	3037.48	-0.008	1	36.18		30	0.012	K	QSGACSGLEEKDYFEAALYFR	S	Methylthio (C)	0.000020000000000000000.0	File844 Spectrum419217 scans: 24136	5363.07	4655.04	4939.53	4583.08	9408.94	15018.8	7362.75	11222.6	12.3888	12.1846	12.2702	12.1621	13.1998	13.8745	12.846	13.4541	12.2514	0.137424	-0.0668421	0.0187375
1256	Pavir.Aa00986.1	Pavir.Aa00986.1	567	110589	21	21	9	9	13.5	159867	1	1	1	802.439	1602.86	2	1602.86	0.0008	0	49.88		29	0.00047	K	NLALNQVDDAAR	L			File836 Spectrum224925 scans: 11106	23582.6	34125.6	27199.7	24126.6	18487.3	15378	9503.18	15146.6	14.5254	15.0586	14.7313	14.5583	14.1742	13.9086	13.2142	13.8867	14.7184	-0.192974	0.340157	0.0128908
1256	Pavir.Aa00986.1	Pavir.Aa00986.1	567	110589	21	21	9	9	13.5	159866	1	1	1	802.439	1602.86	2	1602.86	0.0004	0	39.15		29	0.0055	K	NLALNQVDDAAR	L			File836 Spectrum225012 scans: 11199	16816.6	19249.6	16186.2	17108.2	11537.6	7961.53	9031.26	10810	14.0376	14.2325	13.9825	14.0624	13.4941	12.9588	13.1407	13.4001	14.0788	-0.0411565	0.153785	-0.0962734
1256	Pavir.Aa00986.1	Pavir.Aa00986.1	567	110589	21	21	9	9	13.5	169970	1	1	1	816.958	1631.9	2	1631.9	-0.0017	0	48.34	22	29	0.00072	K	VAELGDVIEDLR	V			File839 Spectrum306285 scans: 27181	13951.2	17631.8	13874	14498	7574.26	3821.6	4710.38	6870.35	13.7681	14.1059	13.7601	13.8236	12.8869	11.9	12.2016	12.7462	13.8644	-0.0963095	0.241478	-0.104322
1256	Pavir.Aa00986.1	Pavir.Aa00986.1	567	110589	21	21	9	9	13.5	116947	1	1	1	740.389	1478.76	2	1478.76	-0.0007	0	41.29	24	28	0.0025	R	SQQESDAAALR	S			File846 Spectrum448528 scans: 4475	13382.4	18111.6	13950.6	12285.9	7343.09	5865.32	5835.86	9203.45	13.7081	14.1446	13.768	13.5847	12.8422	12.518	12.5107	13.168	13.8014	-0.0933055	0.343263	-0.033315
1256	Pavir.Aa00986.1	Pavir.Aa00986.1	567	110589	21	21	9	9	13.5	149506	1	1	1	525.977	1574.91	3	1574.91	-0.0025	0	30.35	24	29	0.041	K	EASFVSSIK	K			File837 Spectrum248369 scans: 12555	8984.91	9338.81	9289.63	8159.98	4690.3	4904.53	3478.11	6297.45	13.1333	13.189	13.1814	12.9943	12.1955	12.2599	11.7641	12.6206	13.1245	0.00877124	0.0645064	0.0568894
1256	Pavir.Aa00986.1	Pavir.Aa00986.1	567	110589	21	21	9	9	13.5	311719	1	1	1	734.402	2200.18	3	2200.19	-0.0024	0	56.55	18	31	0.00015	R	AVELEQTSIESMQK	E			File835 Spectrum206484 scans: 16816	8146.34	9325.61	8338.7	7973.04	9942.67	6144.27	5492.26	5316.45	12.9919	13.187	13.0256	12.9609	13.2794	12.585	12.4232	12.3762	13.0414	-0.0494231	0.145622	-0.0157533
1256	Pavir.Aa00986.1	Pavir.Aa00986.1	567	110589	21	21	9	9	13.5	292750	1	1	1	701.034	2100.08	3	2100.08	-0.0045	0	43.16	16	29	0.0023	K	ATTEAEELADEWK	E			File829 Spectrum64622 scans: 19644	8052.1	8066.98	10158	9118.15	8175.49	5324.44	6177.63	6525.04	12.9751	12.9778	13.3103	13.1545	12.9971	12.3784	12.5928	12.6718	13.1045	-0.129303	-0.12664	0.205871
1256	Pavir.Aa00986.1	Pavir.Aa00986.1	567	110589	21	21	9	9	13.5	169977	1	1	1	816.959	1631.9	2	1631.9	-0.0001	0	58.34	28	29	7.2e-05	K	VAELGDVIEDLR	V			File839 Spectrum306213 scans: 27104	7293.12	9789.81	7963.48	7167.58	4083.82	2856.23	2845.19	4132.53	12.8323	13.2571	12.9592	12.8073	11.9957	11.4799	11.4743	12.0128	12.964	-0.131639	0.293105	-0.00477625
1256	Pavir.Aa00986.1	Pavir.Aa00986.1	567	110589	21	21	9	9	13.5	238483	1	1	1	623.697	1868.07	3	1868.07	-0.0038	0	48.2	21	29	0.00075	K	ELDAASTLLAEK	E			File838 Spectrum277484 scans: 19839	7246.51	10701.8	6720.47	7132.04	5502.93	3627.06	2754.33	3415	12.8231	13.3856	12.7143	12.8001	12.426	11.8246	11.4275	11.7377	12.9308	-0.107699	0.454795	-0.216424
1256	Pavir.Aa00986.1	Pavir.Aa00986.1	567	110589	21	21	9	9	13.5	292747	1	1	1	701.033	2100.08	3	2100.08	-0.0062	0	46.15	25	29	0.0012	K	ATTEAEELADEWK	E			File829 Spectrum64568 scans: 19586	6644.11	8163.6	5739.57	6509.76	5542.82	3478.53	5019.09	4256.97	12.6979	12.995	12.4867	12.6684	12.4364	11.7643	12.2932	12.0556	12.712	-0.0141302	0.282998	-0.225264
1256	Pavir.Aa00986.1	Pavir.Aa00986.1	567	110589	21	21	9	9	13.5	238481	1	1	1	623.696	1868.07	3	1868.07	-0.0049	0	50.92	23	30	0.00042	K	ELDAASTLLAEK	E			File838 Spectrum277522 scans: 19880	6524.89	15511.8	8803.38	9508.17	5160.74	3439.52	2744.75	3530.47	12.6717	13.9211	13.1038	13.215	12.3334	11.748	11.4225	11.7856	13.2279	-0.556165	0.693174	-0.124059
1256	Pavir.Aa00986.1	Pavir.Aa00986.1	567	110589	21	21	9	9	13.5	311722	1	1	1	734.404	2200.19	3	2200.19	0.0037	0	48.5	17	31	0.00091	R	AVELEQTSIESMQK	E			File835 Spectrum206468 scans: 16799	6188.87	7548.36	7791.83	7535.81	8586.04	5620.29	4645.61	6509.34	12.5955	12.8819	12.9277	12.8795	13.0678	12.4564	12.1817	12.6683	12.8212	-0.225715	0.060773	0.106571
1256	Pavir.Aa00986.1	Pavir.Aa00986.1	567	110589	21	21	9	9	13.5	169978	1	1	1	816.96	1631.9	2	1631.9	0.0009	0	59.49	25	29	5.5e-05	K	VAELGDVIEDLR	V			File839 Spectrum306203 scans: 27093	5238.7	7444.85	5236.5	5826.33	3144.22	2229.01	2077.26	2652.62	12.355	12.862	12.3544	12.5084	11.6185	11.1222	11.0205	11.3732	12.5199	-0.164951	0.342083	-0.165559
1256	Pavir.Aa00986.1	Pavir.Aa00986.1	567	110589	21	21	9	9	13.5	146720	1	1	1	523.32	1566.94	3	1566.94	-0.0067	0	35.28		27	0.009	R	LEAEVSALK	I			File836 Spectrum231842 scans: 18484	4780.74	4060.23	4979.94	5121.43	2960.9	1970.13	3123.19	2669.44	12.223	11.9873	12.2819	12.3223	11.5318	10.9441	11.6088	11.3823	12.2037	0.0193663	-0.216307	0.0782625
1256	Pavir.Aa00986.1	Pavir.Aa00986.1	567	110589	21	21	9	9	13.5	314290	1	1	1	739.732	2216.17	3	2216.18	-0.0082	0	49.45	18	30	0.0007	R	AVELEQTSIESMQK	E	Oxidation (M)	0.00000000000300.0	File832 Spectrum129416 scans: 12748	4617.12	6052.21	4108.08	5566.21	4770.49	3155.9	2770.38	4235.67	12.1728	12.5632	12.0042	12.4425	12.2199	11.6238	11.4359	12.0484	12.2957	-0.122911	0.267558	-0.291439
1256	Pavir.Aa00986.1	Pavir.Aa00986.1	567	110589	21	21	9	9	13.5	238484	1	1	1	623.697	1868.07	3	1868.07	-0.0029	0	49.22	22	30	0.0006	K	ELDAASTLLAEK	E			File838 Spectrum277453 scans: 19806	4508.82	10234.1	4167.08	5256.77	3957.4	1987.65	1211.9	2612.26	12.1385	13.3211	12.0248	12.36	11.9503	10.9569	10.2431	11.3511	12.4611	-0.322568	0.859994	-0.436283
1256	Pavir.Aa00986.1	Pavir.Aa00986.1	567	110589	21	21	9	9	13.5	314284	1	1	1	739.73	2216.17	3	2216.18	-0.0127	0	40.91	16	30	0.0049	R	AVELEQTSIESMQK	E	Oxidation (M)	0.00000000000300.0	File832 Spectrum129381 scans: 12711	4239.44	5476.48	4708.13	6148.13	5092.96	2965.26	2486.75	3972.2	12.0497	12.419	12.2009	12.5859	12.3143	11.5339	11.28	11.9557	12.3139	-0.264233	0.105143	-0.112953
1256	Pavir.Aa00986.1	Pavir.Aa00986.1	567	110589	21	21	9	9	13.5	169974	1	1	1	816.958	1631.9	2	1631.9	-0.0012	0	58.83	24	29	6.4e-05	K	VAELGDVIEDLR	V			File839 Spectrum306346 scans: 27246	3926.76	5702.32	5030.77	3965.11	2492.65	1908.87	1760.69	2169.41	11.9391	12.4773	12.2966	11.9531	11.2835	10.8985	10.7819	11.0831	12.1665	-0.227417	0.310792	0.130021
1256	Pavir.Aa00986.1	Pavir.Aa00986.1	567	110589	21	21	9	9	13.5	169971	1	1	1	544.975	1631.9	3	1631.9	-0.0017	0	68.16		29	7.5e-06	K	VAELGDVIEDLR	V			File839 Spectrum306301 scans: 27198	1341.83	1676.05	905.263	1495.05	663.816	563.985	973.436	732.553	10.39	10.7109	9.82219	10.546	9.37464	9.13951	9.92694	9.51679	10.3673	0.0227326	0.3436	-0.545059
1256	Pavir.Aa00986.1	Pavir.Aa00986.1	567	110589	21	21	9	9	13.5	169972	1	1	1	544.975	1631.9	3	1631.9	-0.0013	0	66.48		29	1.1e-05	K	VAELGDVIEDLR	V			File839 Spectrum306228 scans: 27120	559.118	569.377	487.697	732.692	302.61	164.134	235.819	145.076	9.12701	9.15324	8.92984	9.51706	8.24132	7.35873	7.88154	7.18066	9.18179	-0.0547795	-0.0285485	-0.251946
1260	Pavir.Ea00289.1	Pavir.Ea00289.1	567	24372	22	22	4	4	27.5	182159	1	1	1	557.004	1667.99	3	1667.99	-0.0022	0	37.7	16	28	0.0059	K	DGVLTVTVEK	L			File838 Spectrum271476 scans: 13431	19336.4	9411.25	23059.3	19800.4	64316.3	98419.4	65516.7	62055.1	14.239	13.2002	14.4931	14.2732	15.9729	16.5867	15.9996	15.9213	14.0514	0.187652	-0.851206	0.441685
1260	Pavir.Ea00289.1	Pavir.Ea00289.1	567	24372	22	22	4	4	27.5	182157	1	1	1	557.003	1667.99	3	1667.99	-0.0039	0	42.74	19	28	0.0019	K	DGVLTVTVEK	L			File838 Spectrum271445 scans: 13398	7564.29	7780.73	13915.4	20614.9	51175.3	59076.2	46059.3	46168.6	12.885	12.9257	13.7644	14.3314	15.6432	15.8503	15.4912	15.4946	13.4766	-0.591628	-0.550929	0.287778
1260	Pavir.Ea00289.1	Pavir.Ea00289.1	567	24372	22	22	4	4	27.5	182158	1	1	1	557.004	1667.99	3	1667.99	-0.0028	0	34.97	18	28	0.011	K	DGVLTVTVEK	L			File838 Spectrum271554 scans: 13514	4818.78	3541.26	5590.6	3872.04	17965.3	18950.4	17395.4	17187.1	12.2345	11.79	12.4488	11.9189	14.1329	14.2099	14.0864	14.069	12.098	0.136411	-0.307996	0.350746
1260	Pavir.Ea00289.1	Pavir.Ea00289.1	567	24372	22	22	4	4	27.5	182160	1	1	1	557.005	1667.99	3	1667.99	0.0002	0	31.94	16	28	0.021	K	DGVLTVTVEK	L			File838 Spectrum271368 scans: 13315	1540.43	2613.54	1994.37	2814.29	4051.86	5819.77	3988.95	5085.5	10.5891	11.3518	10.9617	11.4586	11.9844	12.5067	11.9618	12.3122	11.0903	-0.501176	0.261491	-0.128575
1318	Pavir.Ia00660.1	Pavir.Ia00660.1	533	37221	19	19	4	4	14.5	190176	1	1	1	848.438	1694.86	2	1694.86	-0.001	0	68.51	19	28	5.3e-06	R	TESATIEENEIR	I			File845 Spectrum427983 scans: 8201	57646.9	73631.4	61369.5	57162.4	27987.6	47540.4	26491.1	50316.8	15.815	16.168	15.9052	15.8028	14.7725	15.5369	14.6932	15.6188	15.9228	-0.107796	0.245282	-0.017516
1318	Pavir.Ia00660.1	Pavir.Ia00660.1	533	37221	19	19	4	4	14.5	190180	1	1	1	848.44	1694.87	2	1694.86	0.0029	0	50.98		28	0.0003	R	TESATIEENEIR	I			File845 Spectrum427948 scans: 8163	19674.3	27733.7	21921.6	19384.4	13283.4	18063.7	10480.1	18061.6	14.264	14.7594	14.4201	14.2426	13.6973	14.1408	13.3554	14.1406	14.4215	-0.157489	0.337841	-0.00144708
1318	Pavir.Ia00660.1	Pavir.Ia00660.1	533	37221	19	19	4	4	14.5	190423	1	1	1	848.931	1695.85	2	1695.85	0.0013	0	59.45	23	27	3.5e-05	R	TESATIEENEIR	I	Deamidated (NQ)	0.000000001000.0	File843 Spectrum379704 scans: 6979	4197.15	4448.74	3421.46	3106.06	1855.03	3136.53	1927.61	3389.21	12.0352	12.1192	11.7404	11.6009	10.8572	11.615	10.9126	11.7267	11.8739	0.161284	0.245271	-0.133515
1318	Pavir.Ia00660.1	Pavir.Ia00660.1	533	37221	19	19	4	4	14.5	227330	1	1	1	610.34	1828	3	1828	-0.0034	0	49.27		30	0.00065	R	QPQHLQQAPPPQR	Q			File835 Spectrum194272 scans: 3534	3697.83	9646.91	5237.63	3492.95	2345.26	3705.92	1372.74	3399.3	11.8525	13.2359	12.3547	11.7702	11.1955	11.8556	10.4228	11.731	12.3033	-0.450847	0.932541	0.0513879
1318	Pavir.Ia00660.1	Pavir.Ia00660.1	533	37221	19	19	4	4	14.5	227329	1	1	1	610.34	1828	3	1828	-0.0034	0	49.97		30	0.00055	R	QPQHLQQAPPPQR	Q			File834 Spectrum168551 scans: 3494	3398.36	7279.85	4387.74	2721.22	1384.22	2545.37	1984.52	2616.74	11.7306	12.8297	12.0993	11.41	10.4349	11.3137	10.9546	11.3536	12.0174	-0.28678	0.812288	0.0818591
1318	Pavir.Ia00660.1	Pavir.Ia00660.1	533	37221	19	19	4	4	14.5	227340	1	1	1	610.34	1828	3	1828	-0.0026	0	55.84		30	0.00015	R	QPQHLQQAPPPQR	Q			File835 Spectrum194301 scans: 3585	3032.45	6096.4	2990.35	2356.91	1290.26	1910.69	979.532	2062.9	11.5663	12.5737	11.5461	11.2027	10.3335	10.8999	9.93595	11.0105	11.7222	-0.155929	0.851544	-0.176099
1318	Pavir.Ia00660.1	Pavir.Ia00660.1	533	37221	19	19	4	4	14.5	190170	1	1	1	565.961	1694.86	3	1694.86	-0.0034	0	46.53	19	28	0.00083	R	TESATIEENEIR	I			File845 Spectrum427936 scans: 8150	2706.31	6395.8	3239.12	3824.73	1888.13	2438.11	2344.1	3323.06	11.4021	12.6429	11.6614	11.9011	10.8827	11.2515	11.1948	11.6983	11.9019	-0.499774	0.741022	-0.240502
1318	Pavir.Ia00660.1	Pavir.Ia00660.1	533	37221	19	19	4	4	14.5	227332	1	1	1	610.34	1828	3	1828	-0.0032	0	60.6		30	4.9e-05	R	QPQHLQQAPPPQR	Q			File834 Spectrum168576 scans: 3547	2531.39	6032.62	3616.77	2645.6	1259.31	2425.77	1272.23	1736.65	11.3057	12.5586	11.8205	11.3694	10.2984	11.2442	10.3131	10.7621	11.7635	-0.457822	0.795031	0.0569482
1318	Pavir.Ia00660.1	Pavir.Ia00660.1	533	37221	19	19	4	4	14.5	227336	1	1	1	610.34	1828	3	1828	-0.0028	0	65.13		30	1.7e-05	R	QPQHLQQAPPPQR	Q			File835 Spectrum194311 scans: 3611	1697.33	3924.94	1815.12	1460.67	733.053	1204.67	690.703	1544.93	10.7291	11.9385	10.8259	10.5124	9.51777	10.2344	9.43192	10.5933	11.0014	-0.272388	0.937011	-0.175591
1318	Pavir.Ia00660.1	Pavir.Ia00660.1	533	37221	19	19	4	4	14.5	227341	1	1	1	610.34	1828	3	1828	-0.0023	0	36.55	15	30	0.012	R	QPQHLQQAPPPQR	Q			File834 Spectrum168596 scans: 3599	452.102	1643.83	640.957	659.235	279.472	547.483	267.19	507.092	8.8205	10.6828	9.32408	9.36465	8.12656	9.09667	8.06172	8.9861	9.54802	-0.727517	1.13483	-0.223937
1318	Pavir.Ia00660.1	Pavir.Ia00660.1	533	37221	19	19	4	4	14.5	227328	1	1	1	610.34	1828	3	1828	-0.0034	0	38.46		30	0.0078	R	QPQHLQQAPPPQR	Q			File835 Spectrum194255 scans: 3488	407.387	979.093	438.027	261.353	149.106	303.416	181.02	415.607	8.67026	9.9353	8.77487	8.02985	7.22019	8.24516	7.50001	8.69908	8.85257	-0.182315	1.08273	-0.0776969
1318	Pavir.Ia00660.1	Pavir.Ia00660.1	533	37221	19	19	4	4	14.5	227331	1	1	1	610.34	1828	3	1828	-0.0032	0	54.18		30	0.00022	R	QPQHLQQAPPPQR	Q			File834 Spectrum168531 scans: 3445	400.448	1186.37	469.223	236.398	336.494	310.132	126.705	474.579	8.64547	10.2123	8.87413	7.88507	8.39444	8.27674	6.98533	8.8905	8.90425	-0.258781	1.30809	-0.0301236
1318	Pavir.Ia00660.1	Pavir.Ia00660.1	533	37221	19	19	4	4	14.5	227338	1	1	1	610.34	1828	3	1828	-0.0026	0	45.95		30	0.0014	R	QPQHLQQAPPPQR	Q			File835 Spectrum194328 scans: 3655	251.712	743.042	445.883	293.364	163.456	361.683	237.668	243.848	7.97563	9.5373	8.80052	8.19655	7.35276	8.49858	7.8928	7.92984	8.6275	-0.651868	0.909799	0.17302
1321	Pavir.Ib00428.1	Pavir.Ib00428.1	532	51133	20	20	8	8	23.9	99789	1	1	1	475.635	1423.88	3	1423.89	-0.0041	0	29.04		26	0.031	K	ISEGLGLK	H			File841 Spectrum338694 scans: 12929	8440.1	10184.7	9700.51	6543.35	23623	42190.8	22655.1	21481.1	13.043	13.3141	13.2438	12.6758	14.5279	15.3646	14.4675	14.3908	13.0692	-0.0261607	0.244914	0.174639
1321	Pavir.Ib00428.1	Pavir.Ib00428.1	532	51133	20	20	8	8	23.9	212122	1	1	1	590.986	1769.94	3	1769.94	-0.0032	0	42.96	18	29	0.0021	K	DAAWETAEAAK	E			File831 Spectrum105325 scans: 12039	7850.13	7752.36	11104.6	11092.4	43525	88704.3	41971	35585	12.9385	12.9204	13.4389	13.4373	15.4096	16.4367	15.3571	15.119	13.1838	-0.245269	-0.26335	0.255105
1321	Pavir.Ib00428.1	Pavir.Ib00428.1	532	51133	20	20	8	8	23.9	203664	1	1	1	581.655	1741.94	3	1741.95	-0.0027	0	35.42	24	30	0.015	K	DAAWETTAAAK	D			File833 Spectrum151076 scans: 10634	6807	6061.43	5284.49	6233.9	13230.8	19762.9	12395.3	12276.5	12.7328	12.5654	12.3675	12.6059	13.6916	14.2705	13.5975	13.5836	12.5679	0.164876	-0.0024866	-0.20038
1321	Pavir.Ib00428.1	Pavir.Ib00428.1	532	51133	20	20	8	8	23.9	5301	1	1	1	440.749	879.483	2	879.486	-0.0022	0	29.33		25	0.02	R	TVDEL	-			File846 Spectrum452808 scans: 9041	3908.19	5707.13	2055.48	4164.16	23359.7	38816.4	16507.9	17187.1	11.9323	12.4786	11.0053	12.0238	14.5117	15.2444	14.0109	14.069	11.86	0.0723081	0.618573	-0.854714
1321	Pavir.Ib00428.1	Pavir.Ib00428.1	532	51133	20	20	8	8	23.9	257164	1	1	1	648.008	1941	3	1941.01	-0.0024	0	36.86	17	29	0.0095	K	DAAWETAEAAGNK	A			File831 Spectrum105091 scans: 11789	2520.75	3082.18	3088.91	3233.8	5068.25	5284.94	3900.89	4074.23	11.2996	11.5897	11.5929	11.659	12.3073	12.3677	11.9296	11.9923	11.5353	-0.235682	0.054417	0.0575654
1321	Pavir.Ib00428.1	Pavir.Ib00428.1	532	51133	20	20	8	8	23.9	203662	1	1	1	871.979	1741.94	2	1741.95	-0.0035	0	72.34	22	29	2.7e-06	K	DAAWETTAAAK	D			File833 Spectrum150989 scans: 10541	2166.36	3758.18	2824.1	3828.54	39463	76831.1	33897.6	27019.5	11.0811	11.8758	11.4636	11.9026	15.2682	16.2294	15.0489	14.7217	11.5808	-0.499701	0.295063	-0.117184
1321	Pavir.Ib00428.1	Pavir.Ib00428.1	532	51133	20	20	8	8	23.9	5299	1	1	1	440.749	879.483	2	879.486	-0.003	0	28.61	24	25	0.024	R	TVDEL	-			File846 Spectrum452735 scans: 8963	1755.45	6990.53	2504.17	2997.83	5038.07	9584.13	4868.8	4529.41	10.7776	12.7712	11.2901	11.5497	12.2987	13.2264	12.2494	12.1451	11.5972	-0.81953	1.17403	-0.307044
1321	Pavir.Ib00428.1	Pavir.Ib00428.1	532	51133	20	20	8	8	23.9	242885	1	1	1	629.329	1884.96	3	1884.97	-0.0037	0	36.06	24	28	0.0093	K	DAAWETAEEAGK	K			File828 Spectrum32567 scans: 11554	1690.54	4128.81	3145.08	3817.36	18877.4	24493.2	15769.2	10745	10.7233	12.0115	11.6189	11.8984	14.2044	14.5801	13.9448	13.3914	11.563	-0.839738	0.448507	0.0558766
1321	Pavir.Ib00428.1	Pavir.Ib00428.1	532	51133	20	20	8	8	23.9	87926	1	1	1	692.896	1383.78	2	1383.78	-0.005	0	32.75	20	28	0.021	R	ADVDATGK	H			File828 Spectrum25892 scans: 4433	1630.53	2882.75	2374.66	1960.19	13664.8	25307.2	13770.2	11559	10.6711	11.4932	11.2135	10.9368	13.7382	14.6273	13.7493	13.4967	11.0787	-0.407531	0.414568	0.134846
1321	Pavir.Ib00428.1	Pavir.Ib00428.1	532	51133	20	20	8	8	23.9	87927	1	1	1	692.896	1383.78	2	1383.78	-0.005	0	39.85	25	28	0.0041	R	ADVDATGK	H			File828 Spectrum25856 scans: 4394	1244.02	2354.37	2195.15	2192.62	9690.67	20414.4	9058.19	8278.5	10.2808	11.2011	11.1001	11.0984	13.2424	14.3173	13.145	13.0152	10.9201	-0.639325	0.281013	0.179987
1321	Pavir.Ib00428.1	Pavir.Ib00428.1	532	51133	20	20	8	8	23.9	262090	1	1	1	654.653	1960.94	3	1960.94	-0.0019	0	55.96		26	5.2e-05	K	EAAETATQSGAEAHER	S			File845 Spectrum424017 scans: 3970	405.637	2228.33	534.127	447.964	3096.76	3561.2	3324.89	1231.01	8.66404	11.1217	9.06104	8.80724	11.5965	11.7981	11.6991	10.2656	9.41352	-0.749472	1.70823	-0.352479
1321	Pavir.Ib00428.1	Pavir.Ib00428.1	532	51133	20	20	8	8	23.9	262075	1	1	1	654.652	1960.93	3	1960.94	-0.0061	0	62.4		25	1.1e-05	K	EAAETATQSGAEAHER	S			File827 Spectrum797 scans: 3984	359.619	677.644	364.099	449.413	1006.44	1266.59	1239.11	658.222	8.49033	9.40438	8.50819	8.8119	9.97505	10.3067	10.2751	9.36243	8.8037	-0.313371	0.600686	-0.295513
1321	Pavir.Ib00428.1	Pavir.Ib00428.1	532	51133	20	20	8	8	23.9	262094	1	1	1	654.654	1960.94	3	1960.94	-0.0004	0	78.57	18	26	2.9e-07	K	EAAETATQSGAEAHER	S			File844 Spectrum400177 scans: 3817	216.527	324.509	246.704	391.043	1060.85	1728.1	1737.54	873.369	7.75841	8.34212	7.94664	8.61118	10.051	10.755	10.7628	9.77045	8.16458	-0.40618	0.17753	-0.21795
1348	Pavir.Ab02645.1	Pavir.Ab02645.1	518	31676	33	33	6	6	24	144905	1	1	1	781.947	1561.88	2	1561.88	-0.0025	0	35.71	21	29	0.012	K	EVDLSTYK	G			File835 Spectrum201616 scans: 11624	70710.7	66507.7	68734.6	79766.4	129474	125055	146779	108000	16.1096	16.0212	16.0687	16.2835	16.9823	16.9322	17.1633	16.7207	16.1208	-0.0111388	-0.0995459	-0.0520309
1348	Pavir.Ab02645.1	Pavir.Ab02645.1	518	31676	33	33	6	6	24	148475	1	1	1	524.977	1571.91	3	1571.91	-0.0052	0	46.7	25	29	0.00086	K	GSLFGENIK	W			File841 Spectrum339205 scans: 13474	39808.4	35285.2	48414.9	47907.5	105236	93081.3	96889.4	55619.8	15.2808	15.1068	15.5632	15.548	16.6833	16.5062	16.5641	15.7633	15.3747	-0.0938858	-0.267898	0.188492
1348	Pavir.Ab02645.1	Pavir.Ab02645.1	518	31676	33	33	6	6	24	144904	1	1	1	781.947	1561.88	2	1561.88	-0.0028	0	43.67	29	29	0.002	K	EVDLSTYK	G			File835 Spectrum201680 scans: 11692	30253.1	24830.2	28291.3	30732.5	46357.1	46627.5	52245.6	44666.3	14.8848	14.5998	14.7881	14.9075	15.5005	15.5089	15.673	15.4469	14.795	0.0897586	-0.195231	-0.006968
1348	Pavir.Ab02645.1	Pavir.Ab02645.1	518	31676	33	33	6	6	24	144900	1	1	1	781.946	1561.88	2	1561.88	-0.004	0	33.81	22	29	0.02	K	EVDLSTYK	G			File835 Spectrum201589 scans: 11595	29901.8	40604.7	35238.5	31825.3	51666.5	53084.1	59077.5	47558.8	14.8679	15.3094	15.1049	14.9579	15.6569	15.696	15.8503	15.5374	15.06	-0.19207	0.249345	0.0448518
1348	Pavir.Ab02645.1	Pavir.Ab02645.1	518	31676	33	33	6	6	24	148472	1	1	1	524.976	1571.91	3	1571.91	-0.0056	0	43.23	24	29	0.0019	K	GSLFGENIK	W			File842 Spectrum361734 scans: 12974	28162.3	30139	34984.7	36877.4	63421.7	64420.2	62002.2	32176.7	14.7815	14.8793	15.0944	15.1704	15.9527	15.9752	15.92	14.9737	14.9814	-0.199951	-0.102082	0.113009
1348	Pavir.Ab02645.1	Pavir.Ab02645.1	518	31676	33	33	6	6	24	148478	1	1	1	524.977	1571.91	3	1571.91	-0.0048	0	44.67	22	29	0.0014	K	GSLFGENIK	W			File841 Spectrum339179 scans: 13446	19500.2	17868.3	21657.4	21268	46344.2	38870.1	44580.1	20830.8	14.2512	14.1251	14.4026	14.3764	15.5001	15.2464	15.4441	14.3464	14.2888	-0.0376193	-0.163709	0.113754
1348	Pavir.Ab02645.1	Pavir.Ab02645.1	518	31676	33	33	6	6	24	148485	1	1	1	524.977	1571.91	3	1571.91	-0.0036	0	32.4	22	29	0.026	K	GSLFGENIK	W			File841 Spectrum339267 scans: 13540	16998.4	17717.9	17214.3	17026.5	42822.9	32786.1	30901.5	19126.7	14.0531	14.1129	14.0713	14.0555	15.3861	15.0008	14.9154	14.2233	14.0732	-0.0201	0.0397114	-0.00189428
1348	Pavir.Ab02645.1	Pavir.Ab02645.1	518	31676	33	33	6	6	24	144893	1	1	1	521.632	1561.88	3	1561.88	-0.0059	0	29.26	17	29	0.054	K	EVDLSTYK	G			File836 Spectrum225548 scans: 11771	16210	17357.9	18862.2	17839.7	28250.8	28479.2	30952	26167.4	13.9846	14.0833	14.2032	14.1228	14.786	14.7976	14.9177	14.6755	14.0985	-0.113885	-0.0151742	0.104733
1353	Pavir.Fb01329.1	Pavir.Fb01329.1	515	30936	15	15	5	5	27.6	277532	1	1	1	677.359	2029.05	3	2029.05	0.0004	0	44.27	18	29	0.0017	K	GAVQFDPAITGEHVER	V			File838 Spectrum270640 scans: 12539	24451.3	23112.8	22636.2	27810.3	26756.3	37369	30984.8	26458.9	14.5776	14.4964	14.4663	14.7633	14.7076	15.1896	14.9193	14.6915	14.5759	0.00169749	-0.0795207	-0.109583
1353	Pavir.Fb01329.1	Pavir.Fb01329.1	515	30936	15	15	5	5	27.6	277530	1	1	1	677.358	2029.05	3	2029.05	-0.0002	0	53.21	26	29	0.00022	K	GAVQFDPAITGEHVER	V			File836 Spectrum226123 scans: 12384	18846.7	22205.1	23823.6	12010.4	31836.3	31800.5	18316.4	16279	14.202	14.4386	14.5401	13.552	14.9584	14.9568	14.1609	13.9907	14.1832	0.0188394	0.255424	0.356922
1353	Pavir.Fb01329.1	Pavir.Fb01329.1	515	30936	15	15	5	5	27.6	123781	1	1	1	751.403	1500.79	2	1500.8	-0.0038	0	57.41	17	27	5.4e-05	R	VPAAAAAAGGGGGDR	S			File838 Spectrum264848 scans: 6361	16080.8	12670.1	15886.8	9923.24	34609	77474.4	48218.8	43713.3	13.9731	13.6291	13.9555	13.2766	15.0789	16.2414	15.5573	15.4158	13.7086	0.264471	-0.0794422	0.246959
1353	Pavir.Fb01329.1	Pavir.Fb01329.1	515	30936	15	15	5	5	27.6	315421	1	1	1	742.39	2224.15	3	2224.15	-0.0012	0	100.9	21	30	4.5e-09	K	LTALPAGGGDGDGAAATGVHGR	V			File840 Spectrum311505 scans: 8851	10826.9	12536.5	9196.7	6910.85	17401.5	20552.3	12010.3	10686.7	13.4023	13.6138	13.1669	12.7546	14.0869	14.327	13.552	13.3835	13.2344	0.167905	0.379411	-0.0675311
1353	Pavir.Fb01329.1	Pavir.Fb01329.1	515	30936	15	15	5	5	27.6	279043	1	1	1	1019.07	2036.12	2	2036.12	-0.0011	0	44.26		30	0.0021	R	DGEGVPVQPGELVPLAR	Q			File837 Spectrum252739 scans: 17216	9972.3	8474.86	11593.3	10240.2	26723.4	28595.2	15831.6	17164.7	13.2837	13.049	13.501	13.322	14.7058	14.8035	13.9505	14.0672	13.2889	-0.00520003	-0.239937	0.212087
1353	Pavir.Fb01329.1	Pavir.Fb01329.1	515	30936	15	15	5	5	27.6	137125	1	1	1	514.625	1540.85	3	1540.86	-0.0021	0	43.52	23	29	0.0021	R	GDSGEEIVK	G			File846 Spectrum450142 scans: 6197	9813.86	8788.29	10914.6	5498.62	26092.3	33019.2	16858.5	13386.4	13.2606	13.1014	13.414	12.4249	14.6713	15.011	14.0412	13.7085	13.0502	0.210404	0.0511669	0.363775
1353	Pavir.Fb01329.1	Pavir.Fb01329.1	515	30936	15	15	5	5	27.6	123782	1	1	1	751.403	1500.79	2	1500.8	-0.0031	0	53.01	16	28	0.00018	R	VPAAAAAAGGGGGDR	S			File838 Spectrum264929 scans: 6447	8318.31	9109.81	6659.77	4898.86	13883.9	27946.3	19062	17904.6	13.0221	13.1532	12.7013	12.2582	13.7611	14.7704	14.2184	14.128	12.7837	0.238383	0.369514	-0.0824343
1353	Pavir.Fb01329.1	Pavir.Fb01329.1	515	30936	15	15	5	5	27.6	123778	1	1	1	751.403	1500.79	2	1500.8	-0.0042	0	69.4	25	27	3.4e-06	R	VPAAAAAAGGGGGDR	S			File838 Spectrum264753 scans: 6259	7814.73	7344.76	7919.83	5262.5	11307.9	26016.1	18674.4	15539	12.932	12.8425	12.9513	12.3615	13.465	14.6671	14.1888	13.9236	12.7718	0.160164	0.0706828	0.179438
1353	Pavir.Fb01329.1	Pavir.Fb01329.1	515	30936	15	15	5	5	27.6	137121	1	1	1	514.625	1540.85	3	1540.86	-0.0034	0	43.7	22	29	0.002	R	GDSGEEIVK	G			File846 Spectrum450198 scans: 6257	7738.84	6673.14	9870.04	4458.11	26784.6	25367.3	15622.7	12545.6	12.9179	12.7041	13.2688	12.1222	14.7091	14.6307	13.9314	13.6149	12.7533	0.164625	-0.0491277	0.515563
1353	Pavir.Fb01329.1	Pavir.Fb01329.1	515	30936	15	15	5	5	27.6	123777	1	1	1	751.403	1500.79	2	1500.8	-0.0044	0	65.08	17	27	9.1e-06	R	VPAAAAAAGGGGGDR	S			File838 Spectrum264944 scans: 6463	7623.57	11183.9	8057.08	5843.62	11158.3	23533	14558.8	14272.1	12.8963	13.4491	12.976	12.5126	13.4458	14.5224	13.8296	13.8009	12.9585	-0.0622661	0.490613	0.0175237
1353	Pavir.Fb01329.1	Pavir.Fb01329.1	515	30936	15	15	5	5	27.6	279040	1	1	1	1019.07	2036.12	2	2036.12	-0.0028	0	45.59		30	0.0015	R	DGEGVPVQPGELVPLAR	Q			File837 Spectrum252752 scans: 17230	7247.74	8278.79	10304.4	7912.66	21011.6	25010.2	15132.5	14025.5	12.8233	13.0152	13.331	12.9499	14.3589	14.6102	13.8854	13.7758	13.0299	-0.206544	-0.0146553	0.301111
1353	Pavir.Fb01329.1	Pavir.Fb01329.1	515	30936	15	15	5	5	27.6	277521	1	1	1	677.357	2029.05	3	2029.05	-0.004	0	47.77	18	29	0.00074	K	GAVQFDPAITGEHVER	V			File836 Spectrum226189 scans: 12454	7216.15	12259.6	7217.55	5817.78	11253.3	14389.2	7640.26	8090.15	12.817	13.5816	12.8173	12.5063	13.4581	13.8127	12.8994	12.982	12.9305	-0.113534	0.651082	-0.113254
1353	Pavir.Fb01329.1	Pavir.Fb01329.1	515	30936	15	15	5	5	27.6	277533	1	1	1	677.359	2029.06	3	2029.05	0.0015	0	47.14	17	29	0.00091	K	GAVQFDPAITGEHVER	V			File836 Spectrum226203 scans: 12469	5868.32	7043.06	7081.78	4929.83	9006.24	11298.5	6342.51	6055.28	12.5187	12.782	12.7899	12.2673	13.1367	13.4638	12.6308	12.564	12.5895	-0.0707532	0.192503	0.200411
1353	Pavir.Fb01329.1	Pavir.Fb01329.1	515	30936	15	15	5	5	27.6	315424	1	1	1	742.391	2224.15	3	2224.15	0.0012	0	58.66		30	8e-05	K	LTALPAGGGDGDGAAATGVHGR	V			File840 Spectrum311600 scans: 8952	5691.99	12163.4	5476.49	5805.96	11028.8	11216.9	9600.41	8284.11	12.4747	13.5703	12.419	12.5033	13.429	13.4534	13.2289	13.0161	12.7418	-0.267116	0.828429	-0.322799
1353	Pavir.Fb01329.1	Pavir.Fb01329.1	515	30936	15	15	5	5	27.6	123774	1	1	1	501.271	1500.79	3	1500.8	-0.0047	0	52.3	23	27	0.00017	R	VPAAAAAAGGGGGDR	S			File838 Spectrum264832 scans: 6344	5379.99	22324.4	3622.52	10626.4	6655.22	6994.34	10237.7	13251.9	12.3934	14.4463	11.8228	13.3754	12.7003	12.772	13.3216	13.6939	13.0095	-0.616078	1.43687	-1.18669
1358	Pavir.J04551.1	Pavir.J04551.1	513	45077	34	34	3	3	11.3	53177	1	0	1	631.392	1260.77	2	1260.77	-0.0018	0	38.13		25	0.0025	R	GILDTLLGR	K			File834 Spectrum187836 scans: 24297	1.93731e+06	1.21091e+06	2.19497e+06	2.12849e+06	1.46715e+07	1.87404e+07	1.06255e+07	9.32453e+06	20.8856	20.2077	21.0658	21.0214	23.8065	24.1596	23.341	23.1526	20.7951	0.0905074	-0.587455	0.27066
1358	Pavir.J04551.1	Pavir.J04551.1	513	45077	34	34	3	3	11.3	53172	1	0	1	631.392	1260.77	2	1260.77	-0.0021	0	40.53		25	0.0014	R	GILDTLLGR	K			File834 Spectrum187926 scans: 24393	1.92619e+06	2.0271e+06	2.1405e+06	1.31727e+06	1.10118e+07	1.55819e+07	9.47825e+06	7.93207e+06	20.8773	20.951	21.0295	20.3291	23.3925	23.8934	23.1762	22.9193	20.7967	0.0805807	0.15425	0.232784
1358	Pavir.J04551.1	Pavir.J04551.1	513	45077	34	34	3	3	11.3	53150	1	0	1	631.391	1260.77	2	1260.77	-0.003	0	32.04	22	25	0.01	R	GILDTLLGR	K			File834 Spectrum188016 scans: 24489	979228	1.46671e+06	1.20219e+06	1.05717e+06	7.44333e+06	9.68074e+06	6.25984e+06	5.40838e+06	19.9013	20.4842	20.1972	20.0118	22.8275	23.2067	22.5777	22.3668	20.1486	-0.247327	0.335542	0.0486167
1358	Pavir.J04551.1	Pavir.J04551.1	513	45077	34	34	3	3	11.3	53169	1	0	1	631.392	1260.77	2	1260.77	-0.0022	0	31.45	22	25	0.012	R	GILDTLLGR	K			File834 Spectrum188196 scans: 24681	745929	1.75319e+06	956147	937791	4.36072e+06	5.62276e+06	3.55916e+06	4.05068e+06	19.5087	20.7416	19.8669	19.8389	22.0561	22.4228	21.7631	21.9497	19.989	-0.480325	0.752552	-0.12213
1358	Pavir.J04551.1	Pavir.J04551.1	513	45077	34	34	3	3	11.3	53162	1	0	1	631.391	1260.77	2	1260.77	-0.0023	0	37.31		25	0.003	R	GILDTLLGR	K			File834 Spectrum188106 scans: 24585	333030	551147	468368	347342	2.0561e+06	2.84471e+06	1.76726e+06	1.69517e+06	18.3453	19.0721	18.8373	18.406	20.9715	21.4399	20.7531	20.693	18.6652	-0.319871	0.406915	0.172121
1358	Pavir.J04551.1	Pavir.J04551.1	513	45077	34	34	3	3	11.3	53173	1	0	1	631.392	1260.77	2	1260.77	-0.0021	0	31.13	20	25	0.013	R	GILDTLLGR	K			File835 Spectrum213089 scans: 23862	287406	310152	587356	272696	2.29054e+06	2.92103e+06	1.53738e+06	1.34873e+06	18.1327	18.2426	19.1639	18.0569	21.1273	21.478	20.552	20.3632	18.399	-0.26631	-0.156422	0.764837
1358	Pavir.J04551.1	Pavir.J04551.1	513	45077	34	34	3	3	11.3	53143	1	0	1	631.391	1260.77	2	1260.77	-0.0035	0	30.45	22	25	0.015	R	GILDTLLGR	K			File834 Spectrum188286 scans: 24777	232371	294221	251313	162386	1.13407e+06	1.59991e+06	1.01755e+06	1.06598e+06	17.8261	18.1665	17.9391	17.3091	20.1131	20.6096	19.9567	20.0237	17.8102	0.0158673	0.35634	0.128925
1358	Pavir.J04551.1	Pavir.J04551.1	513	45077	34	34	3	3	11.3	53189	1	0	1	631.393	1260.77	2	1260.77	-0.0003	0	35.55	23	25	0.0048	R	GILDTLLGR	K			File835 Spectrum213179 scans: 23958	44959.5	58487.1	39627.2	40378.3	224303	357486	195782	199563	15.4563	15.8358	15.2742	15.3013	17.7751	18.4475	17.5789	17.6065	15.4669	-0.0105789	0.368915	-0.192713
1358	Pavir.J04551.1	Pavir.J04551.1	513	45077	34	34	3	3	11.3	53183	1	0	1	631.392	1260.77	2	1260.77	-0.0013	0	32.38	22	25	0.011	R	GILDTLLGR	K			File835 Spectrum213269 scans: 24054	39104.8	86296.6	51960	42982.2	216196	304353	190609	185885	15.2551	16.397	15.6651	15.3915	17.722	18.2154	17.5403	17.5041	15.6772	-0.422103	0.719857	-0.0120453
1358	Pavir.J04551.1	Pavir.J04551.1	513	45077	34	34	3	3	11.3	53178	1	0	1	631.392	1260.77	2	1260.77	-0.0018	0	29.34	21	25	0.019	R	GILDTLLGR	K			File835 Spectrum213362 scans: 24153	35520	62406.4	40347.5	33483.8	132375	183689	117291	127249	15.1163	15.9294	15.3002	15.0312	17.0143	17.4869	16.8397	16.9573	15.3443	-0.227934	0.585126	-0.0440879
1358	Pavir.J04551.1	Pavir.J04551.1	513	45077	34	34	3	3	11.3	53182	1	0	1	631.392	1260.77	2	1260.77	-0.0016	0	29.27	23	25	0.019	R	GILDTLLGR	K			File834 Spectrum187754 scans: 24209	24234.8	28959.8	28055.2	18895.7	130357	174447	92128.1	81462.1	14.5648	14.8218	14.776	14.2058	16.9921	17.4124	16.4914	16.3138	14.5921	-0.0272824	0.229686	0.183901
1358	Pavir.J04551.1	Pavir.J04551.1	513	45077	34	34	3	3	11.3	53174	1	0	1	631.392	1260.77	2	1260.77	-0.0019	0	37.23		25	0.0031	R	GILDTLLGR	K			File836 Spectrum237068 scans: 24064	13137.4	16839.5	13083.2	10766.6	93862.7	118430	65480.7	64151.7	13.6814	14.0396	13.6754	13.3943	16.5183	16.8537	15.9988	15.9692	13.6977	-0.0162731	0.341897	-0.0222334
1358	Pavir.J04551.1	Pavir.J04551.1	513	45077	34	34	3	3	11.3	53151	1	0	1	631.391	1260.77	2	1260.77	-0.003	0	27.94	19	25	0.026	R	GILDTLLGR	K			File835 Spectrum213005 scans: 23772	11705.2	12306.8	15576.3	13818.4	75792.6	101407	53193.2	49307.8	13.5149	13.5872	13.9271	13.7543	16.2098	16.6298	15.699	15.5895	13.6958	-0.180986	-0.108682	0.231215
1358	Pavir.J04551.1	Pavir.J04551.1	513	45077	34	34	3	3	11.3	53149	1	0	1	631.391	1260.77	2	1260.77	-0.0032	0	32.32	22	25	0.0096	R	GILDTLLGR	K			File827 Spectrum12713 scans: 16695	10831.5	18440.6	11969.7	9437.13	50006.7	61597.2	41688.9	32546.7	13.4029	14.1706	13.5471	13.2041	15.6098	15.9106	15.3474	14.9902	13.5812	-0.178249	0.589403	-0.034096
1358	Pavir.J04551.1	Pavir.J04551.1	513	45077	34	34	3	3	11.3	53171	1	0	1	631.392	1260.77	2	1260.77	-0.0021	0	38.19		25	0.0025	R	GILDTLLGR	K			File834 Spectrum188381 scans: 24878	10566.5	20771.5	13709	10614.4	54395.9	67724.6	41754.6	43152.7	13.3672	14.3423	13.7428	13.3737	15.7312	16.0474	15.3496	15.3972	13.7065	-0.339316	0.635795	0.0363057
1358	Pavir.J04551.1	Pavir.J04551.1	513	45077	34	34	3	3	11.3	261494	1	1	1	653.68	1958.02	3	1958.02	-0.0055	0	38.13	19	29	0.0073	K	QQEEELATGMAK	V	Oxidation (M)	0.000000000300.0	File829 Spectrum53395 scans: 7669	10520.4	19562.8	14481.3	16754.2	34106.8	36566.9	33127.3	36403.4	13.3609	14.2558	13.8219	14.0322	15.0578	15.1583	15.0157	15.1518	13.8677	-0.506811	0.388104	-0.045813
1358	Pavir.J04551.1	Pavir.J04551.1	513	45077	34	34	3	3	11.3	53144	1	0	1	631.391	1260.77	2	1260.77	-0.0035	0	35.39	22	25	0.0047	R	GILDTLLGR	K			File835 Spectrum213425 scans: 24220	8911.86	11743	8052.67	8907.48	27390.3	35431.9	24193.8	27882.8	13.1215	13.5195	12.9753	13.1208	14.7414	15.1128	14.5624	14.7671	13.1843	-0.0627581	0.335241	-0.209016
1358	Pavir.J04551.1	Pavir.J04551.1	513	45077	34	34	3	3	11.3	53152	1	0	1	631.391	1260.77	2	1260.77	-0.0028	0	39.69	24	25	0.0018	R	GILDTLLGR	K			File836 Spectrum237142 scans: 24143	8769.74	14116	11236	6473.09	54837.4	75199.9	45255.9	38757.8	13.0983	13.785	13.4558	12.6602	15.7429	16.1984	15.4658	15.2422	13.2499	-0.151544	0.535185	0.205981
1358	Pavir.J04551.1	Pavir.J04551.1	513	45077	34	34	3	3	11.3	281228	1	1	1	683.358	2047.05	3	2047.06	-0.0048	0	47.49	17	29	0.00084	K	IEDDAPPAPEEEK	K			File845 Spectrum428573 scans: 8830	7675.46	10829.8	6371.03	6573.63	17512.2	20398.7	18535.7	21469.8	12.906	13.4027	12.6373	12.6825	14.0961	14.3162	14.178	14.39	12.9071	-0.00109958	0.495587	-0.269826
[truncated: 916 more rows]
[truncated: 5 more columns]

## Sheet: Supplemental Table S3-2
Supplemental Table S3-2. The abundance value of peptides detected from significant expressed proteins in the ProteoMiner treated leaves of switchgrass
[truncated: 1,074 more rows]
[truncated: 5 more columns]
